# Supplementary material for: A Bibliometric Visualization Analysis on Vaccine Development of Coronavirus Disease 2019 (COVID-19)
Source: MDPI journal article supplement (doi:10.3390/vaccines11020295), 2023-01-29
Supplement: s1 [file s1]

## Supplementary Materials

|                    |                                                                                                                                               |
|--------------------|-----------------------------------------------------------------------------------------------------------------------------------------------|
| <b>Appendix S1</b> | Table S1: WHO approved 11 COVID-19 vaccines for the emergency use listing (EUL)                                                               |
| <b>Appendix S2</b> | Table S2: Data from WOS core collection database download published in 2019_87<br><br>Articles n=87                                           |
| <b>Appendix S3</b> | Table S3: Data from WOS core collection database download published in 2020_2400<br><br>Articles n=2400                                       |
| <b>Appendix S4</b> | Table S4: Data from WOS core collection database download published in 2021_10290<br><br>Articles n=10290                                     |
| <b>Appendix S5</b> | Table S5: Data from WOS core collection database download published in 2022_5508<br><br>Articles n=5508                                       |
| <b>Appendix S6</b> | Table S6: Summary from web of science core collection database.                                                                               |
| <b>Appendix S7</b> | Table S7: Publications on 11 WHO-approved COVID-19 vaccines for the emergency use listing                                                     |
| <b>Appendix S8</b> | Figure S1: The top-20 active journals and co-citation cited sources visualization map with in COVID-19 vaccine research by VOSviewer analysis |
| <b>Appendix S9</b> | Table S8: The retracted articles (n =10)                                                                                                      |

**Table S1 WHO approved 11 COVID-19 vaccines for the emergency use listing (EUL)**

| Vaccine type                                                                                 | Trade name  | WHO EUL Holder                                           | Country | Number of doses                        | First recommendation issued |
|----------------------------------------------------------------------------------------------|-------------|----------------------------------------------------------|---------|----------------------------------------|-----------------------------|
| <b>messenger-RNA (mRNA) vaccine</b><br>COVID-19 mRNA Vaccine (nucleoside modified)           | COMIRNATY®  | BioNTech Manufacturing GmbH                              | Germany | 6 doses of 0.3 mL (after dilution)     | 31 Dec 2020                 |
| <b>Recombinant adenovirus vector vaccine</b><br>COVID-19 Vaccine (ChAdOx1-S [recombinant])   | VAXZEVRIA   | AstraZeneca AB / SK Bioscience Co. Ltd<br>AstraZeneca AB | Sweden  | 8 doses (0.5 mL per dose) and 10 doses | 15 Feb 2021                 |
| <b>Recombinant adenovirus vector vaccine</b><br>COVID-19 Vaccine (ChAdOx1-S [recombinant])   | COVISHIELD™ | Serum Institute of India Pvt. Ltd                        | India   | 2 doses (0.5 mL per dose) and 10 doses | 15 Feb 2021                 |
| <b>Recombinant adenovirus vector vaccine</b><br>COVID-19 Vaccine (Ad26.COV2-S [recombinant]) | N/A         | Janssen–Cilag International NV                           | Belgium | 5 doses (0.5 mL per dose)              | 12 Mar 2021                 |
| <b>messenger-RNA (mRNA) vaccine</b>                                                          | SPIKEVAX    | Moderna Biotech                                          | Spain   | 10 doses (0.5                          | 30 Apr 2021                 |

|                                                                                                                      |                |                                                   |                |                                   |             |
|----------------------------------------------------------------------------------------------------------------------|----------------|---------------------------------------------------|----------------|-----------------------------------|-------------|
| COVID-19 mRNA Vaccine (nucleoside modified)                                                                          |                | ModernaTX, Inc                                    |                | mL per dose)                      |             |
| <b>Inactivated vaccine</b><br>Inactivated COVID-19 Vaccine (Vero Cell)                                               | Not applicable | Beijing Institute of Biological Products Co., Ltd | China          | 1, 2 and 5 doses                  | 07 May 2021 |
| <b>Inactivated vaccine</b><br>COVID-19 Vaccine (Vero Cell), Inactivated                                              | CoronaVac      | Sinovac Life Sciences Co., Ltd                    | China          | 1 dose and 2 doses of 0.5 mL each | 01 Jun 2021 |
| <b>Inactivated vaccine</b><br>Covid-19 vaccine (Whole Virion Inactivated Corona Virus vaccine)                       | COVAXIN®       | Bharat Biotech International Ltd                  | India          | 1, 5, 10 and 20 doses             | 03 Nov 2021 |
| <b>Recombinant S proteins subunit vaccine</b><br>COVID-19 vaccine (SARS-CoV-2 rS Protein Nanoparticle [Recombinant]) | COVOVAX™       | Serum Institute of India Pvt. Ltd                 | India          | 1 and 10 doses                    | 17 Dec 2021 |
| <b>Recombinant S proteins subunit vaccine</b><br>COVID-19 vaccine (SARS-CoV-2 rS [Recombinant, adjuvanted])          | NUVAXOVID™     | Novavax CZ a.s.                                   | Czech Republic | 10 doses (0.5 mL per dose)        | 20 Dec 2021 |
| <b>Recombinant adenovirus vector vaccine</b>                                                                         | CONVIDECIA     | CanSino Biologics Inc.                            | China          | 1 and 3 doses of                  | 19 May 2022 |

|                                                |  |  |  |        |  |
|------------------------------------------------|--|--|--|--------|--|
| COVID-19 Vaccine (Ad5-nCoV-S<br>[Recombinant]) |  |  |  | 0.5 mL |  |
|------------------------------------------------|--|--|--|--------|--|
