# Supplementary material for: A Bibliometric Visualization Analysis on Vaccine Development of Coronavirus Disease 2019 (COVID-19)
Source: MDPI journal article supplement (doi:10.3390/vaccines11020295), 2023-01-29
Supplement: s1 [file s1]

## Supplementary Materials

|                    |                                                                                                                                               |
|--------------------|-----------------------------------------------------------------------------------------------------------------------------------------------|
| <b>Appendix S1</b> | Table S1: WHO approved 11 COVID-19 vaccines for the emergency use listing (EUL)                                                               |
| <b>Appendix S2</b> | Table S2: Data from WOS core collection database download published in 2019_87<br><br>Articles n=87                                           |
| <b>Appendix S3</b> | Table S3: Data from WOS core collection database download published in 2020_2400<br><br>Articles n=2400                                       |
| <b>Appendix S4</b> | Table S4: Data from WOS core collection database download published in 2021_10290<br><br>Articles n=10290                                     |
| <b>Appendix S5</b> | Table S5: Data from WOS core collection database download published in 2022_5508<br><br>Articles n=5508                                       |
| <b>Appendix S6</b> | Table S6: Summary from web of science core collection database.                                                                               |
| <b>Appendix S7</b> | Table S7: Publications on 11 WHO-approved COVID-19 vaccines for the emergency use listing                                                     |
| <b>Appendix S8</b> | Figure S1: The top-20 active journals and co-citation cited sources visualization map with in COVID-19 vaccine research by VOSviewer analysis |
| <b>Appendix S9</b> | Table S8: The retracted articles (n =10)                                                                                                      |

**Table S7 Publications on 11 WHO-approved COVID-19 vaccines for the emergency use listing**

| Classification of vaccine                     | Vaccine type                                                                                                                                              | Number | Trade name                              | Publications    |
|-----------------------------------------------|-----------------------------------------------------------------------------------------------------------------------------------------------------------|--------|-----------------------------------------|-----------------|
| <b>messenger-RNA (mRNA) vaccine</b>           | COVID-19 mRNA Vaccine (nucleoside modified)<br>COVID-19 mRNA Vaccine (nucleoside modified)<br>COVID-19 Vaccine (Ad5-nCoV-S [Recombinant])                 | 3      | COMIRNATY®<br>SPIKEVAX<br>CONVIDECIA    | 1210<br>(63.2%) |
| <b>Recombinant adenovirus vector vaccine</b>  | COVID-19 Vaccine (ChAdOx1-S [recombinant])<br>COVID-19 Vaccine (ChAdOx1-S [recombinant])<br>COVID-19 Vaccine (Ad26.COV2-S [recombinant])                  | 3      | VAXZEVRIA<br>COVISHIELD™<br>N/A         | 397<br>(20.7%)  |
| <b>Inactivated vaccine</b>                    | Inactivated COVID-19 Vaccine (Vero Cell)<br>COVID-19 Vaccine (Vero Cell), Inactivated<br>Covid-19 vaccine (Whole Virion Inactivated Corona Virus vaccine) | 3      | Not applicable<br>CoronaVac<br>COVAXIN® | 231(12.1%)      |
| <b>Recombinant S proteins subunit vaccine</b> | COVID-19 vaccine (SARS-CoV-2 rS Protein Nanoparticle [Recombinant])<br>COVID-19 vaccine (SARS-CoV-2 rS [Recombinant, adjuvanted])                         | 2      | COVOVAX™<br>NUVAXOVID™                  | 76(4.0%)        |
