# Supplementary material for: A Bibliometric Visualization Analysis on Vaccine Development of Coronavirus Disease 2019 (COVID-19)
Source: Vaccines (Basel). 2023 Jan 29;11(2):295. doi: 10.3390/vaccines11020295 (PMC9959778; doi:10.3390/vaccines11020295)
Supplement: Supplementary file 1 [file vaccines-11-00295-s001.zip]

Archive with 9 entries (9 files):
- Appendix S1 WHO approved 11 COVID-19 vaccines for the emergency use listing.pdf
- Appendix S2 data from WOS core collection database download published in 2019_87.csv
- Appendix S3 data from WOS core collection database downloadpublished in 2020_2400.csv
- Appendix S4 data from WOS core collection database download published in 2021_10290.csv
- Appendix S5 data from WOS core collection database download published in 2022_5508.csv
- Appendix S6 summary from web of science core collection database.xlsx
- Appendix S7 Publications on 11 WHO-approved COVID-19 vaccines for the emergency use listing.pdf
- Appendix S8 the retracted articles.csv
- Figure S1. The top-20 active journals and co-citation cited sources.pdf
