# Supplementary material for: A Bibliometric Visualization Analysis on Vaccine Development of Coronavirus Disease 2019 (COVID-19)
Source: Vaccines (Basel). 2023 Jan 29;11(2):295. doi: 10.3390/vaccines11020295 (PMC9959778; doi:10.3390/vaccines11020295)
Supplement: Supplementary file 1 [file vaccines-11-00295-s001.zip › Appendix S2 data from WOS core collection database download published in 2019_87.csv]

Key	Item Type	Publication Year	Author	Title	Publication Title	ISBN	ISSN	DOI	Url	Abstract Note	Date	Date Added	Date Modified	Access Date	Pages	Num Pages	Issue	Volume	Number Of Volumes	Journal Abbreviation	Short Title	Series	Series Number	Series Text	Series Title	Publisher	Place	Language	Rights	Type	Archive	Archive Location	Library Catalog	Call Number	Extra	Notes	File Attachments	Link Attachments	Manual Tags	Automatic Tags	Editor	Series Editor	Translator	Contributor	Attorney Agent	Book Author	Cast Member	Commenter	Composer
QXDXI6S8	journalArticle	2019	Kim, Myung Hee; Kim, Hyun Jik; Chang, Jun	Superior immune responses induced by intranasal immunization with recombinant adenovirus-based vaccine expressing full-length Spike protein of Middle East respiratory syndrome coronavirus	Plos One		1932-6203	10.1371/journal.pone.0220196		Middle East respiratory syndrome coronavirus (MERS-CoV) causes an acute and severe lower respiratory illness as well as vomiting, diarrhea, and renal failure. Because no licensed MERS-CoV vaccines are currently available, preventive and therapeutic measures are urgently needed. The surface spike (S) glycoprotein of MERS-CoV, which binds to the cellular receptor dipeptidyl peptidase 4 (DPP4), is c…	2019/7/22	2022/9/19 6:52	2022/9/19 6:52		e0220196		7	14		PLoS One								English							Place: San Francisco Publisher: Public Library Science WOS:000484974100054				immunogenicity; infection; challenge; clinical-features; mers-cov; neutralizing antibodies; receptor-binding domain; t-cells
3L66KDB7	journalArticle	2019	Jo, Seri; Kim, Hyojin; Kim, Suwon; Shin, Dong Hae; Kim, Mi-Sun	Characteristics of flavonoids as potent MERS-CoV 3C-like protease inhibitors	Chemical Biology & Drug Design		1747-0277	10.1111/cbdd.13604		Middle East respiratory syndrome-coronavirus (MERS-CoV) is a zoonotic virus transmitted between animals and human beings. It causes MERS with high mortality rate. However, no vaccine or specific treatment is currently available. Since antiviral activity of some flavonoids is known, we applied a flavonoid library to probe inhibitory compounds against MERS-CoV 3C-like protease (3CLpro). Herbacetin,…	19-Dec	2022/9/19 6:52	2022/9/19 6:52		2023-2030		6	94		Chem. Biol. Drug Des.								English							Place: Hoboken Publisher: Wiley WOS:000486578100001				chalcone; dengue; flavonoid; fret; inhibitory compounds; insights; MERS-CoV; MERS-CoV 3CLpro; naringenin; replication; sars-cov
D75SQ5LN	journalArticle	2019	Abdirizak, Fatima; Lewis, Rayleen; Chowell, Gerardo	Evaluating the potential impact of targeted vaccination strategies against severe acute respiratory syndrome coronavirus (SARS-CoV) and Middle East respiratory syndrome coronavirus (MERS-CoV) outbreaks in the healthcare setting	Theoretical Biology and Medical Modelling			10.1186/s12976-019-0112-6		Background Severe Acute Respiratory Syndrome (SARS) and Middle East Respiratory Syndrome (MERS) are two coronaviruses with demonstrated potential to generate significant nosocomial outbreaks. In particular, MERS continues to pose a significant threat in the Middle East since 2012. Currently, no licensed vaccine or drug treatment is available to treat patients infected with either coronavirus. How…	2019/10/7	2022/9/19 6:52	2022/9/19 6:52		16		1	16		Theor. Biol. Med. Model.								English							Place: London Publisher: Bmc WOS:000489009400001				Vaccine; Coronavirus; infection; And infection control and prevention; ebola; Hospital transmission; mers; Middle East; Nosocomial; nosocomial outbreak; sars; saudi-arabia; South Korea; south-korea; Stochastic simulation; Vaccination strategy
WHV2SB85	journalArticle	2019	Ababneh, Mustafa; Alrwashdeh, Mu'men; Khalifeh, Mohammad	Recombinant adenoviral vaccine encoding the spike 1 subunit of the Middle East Respiratory Syndrome Coronavirus elicits strong humoral and cellular immune responses in mice	Veterinary World		0972-8988	10.14202/vetworld.2019.1554-1562		Background and Aim: Middle East respiratory syndrome coronavirus (MERS-CoV) has rapidly spread throughout the Middle East since its discovery in 2012. The virus poses a significant global public health threat with potentially devastating effects. In this study, a recombinant adenoviral-based vaccine encoding the spike 1 (S1) subunit of the MERS-CoV genome was constructed, and its humoral, and cel…	19-Oct	2022/9/19 6:52	2022/9/19 6:52		1554-1562		10	12		Vet. World								English							Place: Gujarat Publisher: Veterinary World WOS:000491059600007				immunogenicity; recombinant vaccine; Middle East respiratory syndrome; virus; mers-cov; receptor-binding domain; coronavirus; endogenous biotin; expression; immunization; intranasal; protective immunity; protein; spike protein
L2JRAZR5	journalArticle	2020	Zheng, Ke; Jiang, Fang-Fang; Su, Le; Wang, Xin; Chen, Yu-Xin; Chen, Huan-Chun; Liu, Zheng-Fei	Highly Efficient Base Editing in Viral Genome Based on Bacterial Artificial Chromosome Using a Cas9-Cytidine Deaminase Fused Protein	Virologica Sinica		1674-0769	10.1007/s12250-019-00175-4		Viruses evolve rapidly and continuously threaten animal health and economy, posing a great demand for rapid and efficient genome editing technologies to study virulence mechanism and develop effective vaccine. We present a highly efficient viral genome manipulation method using CRISPR-guided cytidine deaminase. We cloned pseudorabies virus genome into bacterial artificial chromosome, and used CRI…	20-Apr	2022/9/19 6:52	2022/9/19 6:52		191-199		2	35		Virol. Sin.								English							Place: New York Publisher: Springer WOS:000500011900001				coronavirus; Bacterial artificial chromosome (BAC); Base-editing; Cas9; china; crispr; crispr/cas9; dna; duck enteritis virus; generation; Genome editing; mutagenesis; nuclear-membrane; pseudorabies virus; Pseudorabies virus (PRV); transport
NH7YWFHX	journalArticle	2019	Li, Kai; Li, Hao; Bi, Zhen; Song, Deping; Zhang, Fanfan; Lei, Dan; Luo, Suxian; Li, Zhiquan; Gong, Wang; Huang, Dongyan; Ye, Yu; Tang, Yuxin	Significant inhibition of re-emerged and emerging swine enteric coronavirus in vitro using the multiple shRNA expression vector	Antiviral Research		0166-3542	10.1016/j.antiviral.2019.03.010		Swine enteric coronaviruses (SECoVs), including porcine epidemic diarrhea virus (PEDV), swine acute diarrhea syndrome coronavirus (SADS-CoV), and porcine deltacoronavirus (PDCoV) have emerged and been prevalent in pig populations in China for the last several years. However, current traditional inactivated and attenuated PEDV vaccines are of limited efficacy against circulating PEDV variants, and…	19-Jun	2022/9/19 6:52	2022/9/19 6:52		11月18日			166		Antiviral Res.								English							Place: Amsterdam Publisher: Elsevier WOS:000469522900002				prevalence; replication; protein; alphacoronavirus; china identification; discovery; epidemic diarrhea virus; Multi-resistance strategy; Multiple short hairpin RNAs; porcine deltacoronavirus; rna interference; sirna; Swine enteric coronavirus
FYC4SZBL	journalArticle	2019	Yezli, Saber; Alotaibi, Badriah; Al-Abdely, Hail; Balkhy, Hanan H.; Yassin, Yara; Mushi, Abdulaziz; Maashi, Fuad; Pezzi, Laura; Benkouiten, Samir; Charrel, Rerni; Raoult, Didier; Gautret, Philippe	Acquisition of respiratory and gastrointestinal pathogens among health care workers during the 2015 Hajj season	American Journal of Infection Control		0196-6553	10.1016/j.ajic.2019.02.033		Background: Data on the risk of transmission of infection to health care workers (HCWs) serving ill pilgrims during the Hajj is scarce. Methods: Two cohorts of HCWs, the first serving Hajj pilgrims in Mecca and the second serving patients in Al-Ahsa, were investigated for respiratory and gastrointestinal symptoms and pathogen carriage using multiplex polymerase chain reaction before and after the…	19-Sep	2022/9/19 6:52	2022/9/19 6:52		1071-1076		9	47		Am. J. Infect. Control								English							Place: New York Publisher: Mosby-Elsevier WOS:000482179200009				vaccine; prevalence; influenza; mers-cov; barriers; carriage; Carriage; Gastrointestinal; pilgrims; Respiratory; syndrome coronavirus; tract infections; viruses
P5TVPGX7	journalArticle	2019	Srivastava, Sukrit; Kamthania, Mohit; Pandey, Rajesh Kumar; Saxena, Ajay Kumar; Saxena, Vaishali; Singh, Santosh Kumar; Sharma, Rakesh Kumar; Sharma, Nishi	Design of novel multi-epitope vaccines against severe acute respiratory syndrome validated through multistage molecular interaction and dynamics	Journal of Biomolecular Structure & Dynamics		0739-1102	10.1080/07391102.2018.1548977		Severe acute respiratory syndrome (SARS) is endemic in South China and is continuing to spread worldwide since the 2003 outbreak, affecting human population of 37 countries till present. SARS is caused by the severe acute respiratory syndrome Coronavirus (SARS-CoV). In the present study, we have designed two multi-epitope vaccines (MEVs) composed of cytotoxic T lymphocyte (CTL), helper T lymphocy…	2019/11/2	2022/9/19 6:52	2022/9/19 6:52		4345-4360		16	37		J. Biomol. Struct. Dyn.								English							Place: Philadelphia Publisher: Taylor & Francis Inc WOS:000481870600021				fusion protein; sars-cov; coronavirus; epitope; helminth onchocerca-volvulus; human transporter associated with antigen processing; innate immunity; molecular docking; molecular dynamics simulation; multi-epitope vaccines; nucleocapsid protein; peptide; prediction; scoring function; Severe acute respiratory syndrome; severe acute respiratory syndrome coronavirus; tap transport; Toll-like receptors
KHP8ELMH	journalArticle	2019	Hou, Yixuan; Ke, Hanzhong; Kim, Jineui; Yoo, Dongwan; Su, Yunfang; Boley, Patricia; Chepngeno, Juliet; Vlasova, Anastasia N.; Saif, Linda J.; Wang, Qiuhong	Engineering a Live Attenuated Porcine Epidemic Diarrhea Virus Vaccine Candidate via Inactivation of the Viral 2 '-O-Methyltransferase and the Endocytosis Signal of the Spike Protein	Journal of Virology		0022-538X	10.1128/JVI.00406-19		Porcine epidemic diarrhea virus (PEDV) causes high mortality in neonatal piglets; however, effective and safe vaccines are still not available. We hypothesized that inactivation of the 2'-O-methyltransferase (2'-O-MTase) activity of nsp16 and the endocytosis signal of the spike protein attenuates PEDV yet retains its immunogenicity in pigs. We generated a recombinant PEDV, KDKE4A, with quadruple …	19-Aug	2022/9/19 6:52	2022/9/19 6:52		e00406-19		15	93		J. Virol.								English							Place: Washington Publisher: Amer Soc Microbiology WOS:000475793200010				vaccine; infection; pathogenesis; coronavirus; 2 '-O-methyltransferase; binding; coronaviruses; degradation; interferon-production; nsp16; pedv; rational design; strain; united-states
BYDKDRDS	journalArticle	2019	New, R. R. C.; Moore, B. D.; Butcher, W.; Mahood, R.; Lever, M. S.; Smither, S.; O'Brien, L.; Weller, S. A.; Bayliss, M.; Gibson, L. C. D.; Macleod, C.; Bogu, M.; Harvey, R.; Almond, N.; Williamson, E. D.	Antibody-mediated protection against MERS-CoV in the murine model	Vaccine		0264-410X	10.1016/j.vaccine.2019.05.074		Murine antisera with neutralising activity for the coronavirus causative of Middle East respiratory syndrome (MERS) were induced by immunisation of Balb/c mice with the receptor binding domain (RBD) of the viral Spike protein. The murine antisera induced were fully-neutralising in vitro for two separate clinical strains of the MERS coronavirus (MERS-CoV). To test the neutralising capacity of thes…	2019/7/9	2022/9/19 6:52	2022/9/19 6:52		4094-4102		30	37		Vaccine								English							Place: Oxford Publisher: Elsevier Sci Ltd WOS:000475995700031				Vaccination; Coronavirus; receptor-binding domain; mers; spike protein; fc-fusion proteins; immunity; middle-east; Mucosal immunity; Neutralising antibody; Novel vaccine formulation; Respiratory infection; Systemic immunity; vaccines
T6II37XF	journalArticle	2019	Wu, Qi; Lin, Zhixian; Qian, Kun; Shao, Hongxia; Ye, Jianqiang; Qin, Aijian	Peptides with 16R in S2 protein showed broad reactions with sera against different types of infectious bronchitis viruses	Veterinary Microbiology		0378-1135	10.1016/j.vetmic.2019.108391		Vaccination plays a vital role in controlling diseases caused by chicken infectious bronchitis virus (IBV). The continuously variant antigenicity of IBV limits the application of current vaccine strategies and serological diagnostic systems. S2 protein is an invariant that harbors broad neutralizing epitopes. However, little is known about the key amino acids that contribute to the broad-spectrum…	19-Sep	2022/9/19 6:52	2022/9/19 6:52		108391			236		Vet. Microbiol.								English							Place: Amsterdam Publisher: Elsevier WOS:000487571700011				Serology; coronavirus; 16r; antibodies; antigenic epitopes; gene; identification; Infectious bronchitis virus; n-protein; Peptide; protection; s1; S2 protein; structural proteins
ERC8G2YT	journalArticle	2019	Ghalyanchilangeroudi, Arash; Hosseini, Hossein; Mehrabadi, Mohammad Hossein Fallah; Ghafouri, Seyed Ali; Hamdan, Amir Modiri; Ziafati, Zahra; Dizaji, Reza Esmaeelzadeh; Mohammadi, Peyman	Genotyping of avian infectious bronchitis virus in Iran: Detection of D274 and changing in the genotypes rate	Comparative Immunology Microbiology and Infectious Diseases		0147-9571	10.1016/j.cimid.2019.05.011		The coronavirus avian Infectious bronchitis virus (IBV) poses economic threats to poultry farms worldwide, affecting the performance of both meat-type and egg-laying birds. To define the evolution of recent IBVs in Iran, a genetic analysis based on hypervariable nucleotide sequences of S1 gene was carried out. Tracheal swab samples were collected from 170 Broiler flocks during 2017. Ten tracheal …	19-Aug	2022/9/19 6:52	2022/9/19 6:52		110-115			65		Comp. Immunol. Microbiol. Infect. Dis.								English							Place: Oxford Publisher: Elsevier Sci Ltd WOS:000474577400018				epidemiology; vaccine; Spike; challenge; protection; Avian infectious bronchitis virus; broilers; chickens; d274; flocks; Iran; molecular characterization; pathogenicity; Phylogenetic analysis; strains
EWB3RHFD	journalArticle	2019	Khayale, Cedric; Kariuki, Linus; Chege, Geoffrey; Sibanda, Mxolisi; Mulama, Martin; Okita-Ouma, Benson; Amin, Rajan	Progress on the Kenya black rhino Action Plan (2017-2021)	Pachyderm		1026-2881			Kenya conserves 75% of the eastern black rhino sub species Diceros bicornis michaeli, which is listed as Critically Endangered by the International Union for Conservation of Nature (IUCN, Emslie 2020). The species gradual recovery has been guided by a series of national five-year conservation action plans or strategies, following its dramatic decline from around 20,000 animals in the early 1970s …	19-Jun	2022/9/19 6:52	2022/9/19 6:52		109-119		61			Pachyderm								English							Place: Rajagiriya Publisher: Iucn-Ssc Asian Elephant Specialist Group WOS:000581131900009				biological management; conservation; poaching; security
P54HPQFB	journalArticle	2019	Alharbi, Naif Khalaf; Qasim, Ibrahim; Almasoud, Abdulrahman; Aljami, Haya A.; Alenazi, Mohamed W.; Alhafufi, Ali; Aldibasi, Omar S.; Hashem, Anwar M.; Kasem, Samy; Albrahim, Raed; Aldubaib, Musaad; Almansour, Ali; Temperton, Nigel J.; Kupke, Alexandra; Becker, Stephan; Abu-obaidah, Ali; Alkarar, Ali; Yoon, In-Kyu; Azhar, Esam; Lambe, Teresa; Bayoumi, Faisal; Aldowerij, Ali; Ibrahim, Osman H.; Gil…	Humoral Immunogenicity and Efficacy of a Single Dose of ChAdOx1 MERS Vaccine Candidate in Dromedary Camels	Scientific Reports		2045-2322	10.1038/s41598-019-52730-4		MERS-CoV seronegative and seropositive camels received a single intramuscular dose of ChAdOx1 MERS, a replication-deficient adenoviral vectored vaccine expressing MERS-CoV spike protein, with further groups receiving control vaccinations. Infectious camels with active naturally acquired MERSCoV infection, were co-housed with the vaccinated camels at a ratio of 1:2 (infected:vaccinated); nasal dis…	2019/11/8	2022/9/19 6:52	2022/9/19 6:52		16292			9		Sci Rep								English							Place: London Publisher: Nature Publishing Group WOS:000495370500011				prevalence; africa; cov infection; neutralizing antibodies; receptor; respiratory syndrome coronavirus; transmission
CTIK3TI4	journalArticle	2019	Wrapp, Daniel; McLellan, Jason S.	The 3.1-Angstrom Cryo-electron Microscopy Structure of the Porcine Epidemic Diarrhea Virus Spike Protein in the Prefusion Conformation	Journal of Virology		0022-538X	10.1128/JVI.00923-19		Porcine epidemic diarrhea virus (PEDV) is an alphacoronavirus that has a significant agricultural and economic impact due to the high mortality rate associated with infection of neonatal piglets. Like other coronaviruses, PEDV makes use of a large, trimeric spike (S) glycoprotein to mediate membrane fusion and gain entry into host cells. Despite the importance of the spike protein in viral entry …	19-Dec	2022/9/19 6:52	2022/9/19 6:52		e00923-19		23	93		J. Virol.								English							Place: Washington Publisher: Amer Soc Microbiology WOS:000496916400008				fusion protein; mers-cov; pedv; receptor; alphacoronavirus spike; aminopeptidase-n; cell entry; cryo-EM; crystal-structure; respiratory coronavirus; s1-ctd
VXWQSXM2	journalArticle	2019	Wang, Nianshuang; Rosen, Osnat; Wang, Lingshu; Turner, Hannah L.; Stevens, Laura J.; Corbett, Kizzmekia S.; Bowman, Charles A.; Pallesen, Jesper; Shi, Wei; Zhang, Yi; Leung, Kwanyee; Kirchdoerfer, Robert N.; Becker, Michelle M.; Denison, Mark R.; Chappell, James D.; Ward, Andrew B.; Graham, Barney S.; McLellan, Jason S.	Structural Definition of a Neutralization-Sensitive Epitope on the MERS-CoV S1-NTD	Cell Reports		2211-1247	10.1016/j.celrep.2019.08.052		Middle East respiratory syndrome coronavirus (MERS-CoV) emerged into the human population in 2012 and has caused substantial morbidity and mortality. Potently neutralizing antibodies targeting the receptor-binding domain (RBD) on MERS-CoV spike (S) protein have been characterized, but much less is known about antibodies targeting non-RBD epitopes. Here, we report the structural and functional cha…	2019/9/24	2022/9/19 6:52	2022/9/19 6:52		3395-+		13	28		Cell Reports								English							Place: Cambridge Publisher: Cell Press WOS:000487587300010				receptor-binding domain; spike protein; identification; respiratory syndrome coronavirus; crystal-structure; bovine coronavirus; functional receptor; human monoclonal-antibody; s-protein; sialic-acid
ENEE3I84	journalArticle	2019	Alhazmi, Ali M.; Alshammari, Sulaiman A.; Alenazi, Hanan A.; Shaik, Shaffi A.; AlZaid, Hala M.; Almahmoud, Nouf S.; Alshammari, Hotoon S.	Community's compliance with measures for the prevention of respiratory infections in Riyadh, Saudi Arabia	Journal of Family and Community Medicine		2230-8229	10.4103/jfcm.JFCM_4_19		BACKGROUND: Acute respiratory tract infections are the most common causes of both morbidity and mortality worldwid, and the management and prevention of acute respiratory infections is a global problem, especially in developing countries. This study sought to assess the community's compliance and practice of measures for the prevention of respiratory infections and discover their source of health…	19-Dec	2022/9/19 6:52	2022/9/19 6:52		173-180		3	26		J. Fam. Community Med.								English							Place: Mumbai Publisher: Wolters Kluwer Medknow Publications WOS:000487708500003				attitudes; knowledge; infection control; influenza; coronavirus; Compliance; h1n1; pandemic flu; population; respiratory infection
UTS8FWUH	journalArticle	2019	Mettelman, Robert C.; O'Brien, Amornrat; Whittaker, Gary R.; Baker, Susan C.	Generating and evaluating type I interferon receptor-deficient and feline TMPRSS2-expressing cells for propagating serotype I feline infectious peritonitis virus	Virology		0042-6822	10.1016/j.virol.2019.08.030		Feline coronavirus infection can progress to a fatal infectious peritonitis, which is a widespread feline disease without an effective vaccine. Generating feline cells with reduced ability to respond to interferon (IFN) is an essential step facilitating isolation of new candidate vaccine strains. Here, we describe the use of Crispr/Cas technology to disrupt type I IFN signaling in two feline cell…	19-Nov	2022/9/19 6:52	2022/9/19 6:52		226-236			537		Virology								English							Place: San Diego Publisher: Academic Press Inc Elsevier Science WOS:000503913400025				pathogenesis; spike protein; 3c-like proteases; AK-D cells; antibody-dependent enhancement; cleavage; coronavirus infections; Crispr/Cas gene editing; Fcwf-4 CU cells; Feline coronavirus; fipv; IFN alpha R-deficient cells; inhibition; Interferon signaling-deficient cells; monoclonal-antibodies; respiratory syndrome; responses; TMPRSS2-expressing cells
72926234	journalArticle	2019	Oade, Michael S.; Keep, Sarah; Freimanis, Graham L.; Orton, Richard J.; Britton, Paul; Hammond, John A.; Bickerton, Erica	Attenuation of Infectious Bronchitis Virus in Eggs Results in Different Patterns of Genomic Variation across Multiple Replicates	Journal of Virology		0022-538X	10.1128/JVI.00492-19		The gammacoronavirus infectious bronchitis virus (IBV) causes an acute, highly contagious respiratory disease of poultry. Live attenuated vaccines are traditionally generated by serial passage of a virulent strain in embryonated chicken eggs; however, the molecular mechanism of attenuation is unknown. M41-CK, a virulent lab-adapted strain of IBV, was egg passaged over 100 times in four parallel i…	19-Jul	2022/9/19 6:52	2022/9/19 6:52		e00492-19		14	93		J. Virol.								English							Place: Washington Publisher: Amer Soc Microbiology WOS:000473273500016				coronavirus; strain; vaccines; attenuation; cultures; genetic diversity; genomic variation; high-throughput sequencing; infectious bronchitis virus; recombination; rna; selection; subpopulations
5RUWUTQF	journalArticle	2019	Li, Yize; Dong, Beihua; Wei, Zuzhang; Silverman, Robert H.; Weiss, Susan R.	Activation of RNase L in Egyptian Rousette Bat-Derived RoNi/7 Cells Is Dependent Primarily on OAS3 and Independent of MAVS Signaling	Mbio		2150-7511	10.1128/mBio.02414-19		Bats are reservoirs for many RNA viruses that are highly pathogenic in humans yet relatively apathogenic in the natural host. It has been suggested that differences in innate immunity are responsible. The antiviral OAS-RNase L pathway is well characterized in humans, but there is little known about its activation and antiviral activity in bats. During infection, OASs, upon sensing double-stranded…	19-Dec	2022/9/19 6:52	2022/9/19 6:52		e02414-19		6	10		mBio								English							Place: Washington Publisher: Amer Soc Microbiology WOS:000500484800031				interferon; virus; replication; expression; protein; bat innate immunity; cluster; dsRNA-induced pathways; Egyptian Rousette; fruit bat; mechanism; murine coronavirus; OAS-RNase; OAS-RNase L; reveals; Rousettus aegyptiacus
DQ82GZJL	journalArticle	2019	Zegpi, R. A.; Gulley, S. L.; van Santen, V. L.; Joiner, K. S.; Toro, H.	Infectious Bronchitis Virus Vaccination at Day 1 of Age Further Limits Cross Protection	Avian Diseases		0005-2086	10.1637/12009-120518-Reg.1		Cross-protection and immune responses elicited by infectious bronchitis virus (IBV) vaccination on Day 1 of age or at later rime points were examined. Specific-pathogen-free chickens were vaccinated with a Massachusetts-type vaccine and heterologous challenge was performed with an Arkansas (Ark) -type virulent strain. In Trial 1, chickens vaccinated on Day 1 or Day 10 of age were challenged 21 da…	19-Jun	2022/9/19 6:52	2022/9/19 6:52		302-309		2	63		Avian Dis.								English							Place: Athens Publisher: Amer Assoc Avian Pathologists WOS:000470322100005				antibody; infectious bronchitis virus; age of vaccination; avidity; cell immune response; cell responses; chicken; coronavirus ibv; cross protection; cytotoxic t-lymphocytes; harderian-gland; immune-responses; lacrimal fluid; level; lymphoid-tissues
AKUP8TCP	journalArticle	2019	Guzman, Miguel; Saenz, Leonardo; Hidalgo, Hector	Molecular and Antigenic Characterization of GI-13 and GI-16 Avian Infectious Bronchitis Virus Isolated in Chile from 2009 to 2017 Regarding 4/91 Vaccine Introduction	Animals		2076-2615	10.3390/ani9090656		Simple Summary The high adaptation and recombination abilities of infectious bronchitis virus (IB) have been proven. This study aims to verify the genetic and antigenic variation of eight field IB strains regarding the 4/91 strain vaccination in Chilean chickens. Phylogenetic, serologic and challenge studies were carried out to accomplish this goal. The genetic analyses indicate that all the viru…	19-Sep	2022/9/19 6:52	2022/9/19 6:52		656		9	9		Animals								English							Place: Basel Publisher: Mdpi WOS:000487978900076				coronavirus; spike protein; strains; recombination; 4; 91 vaccine; amino-acids; antigenic relationship; broiler-chickens; infectious bronchitis; neutralization; pathogen-free; phylogenetic classification; protection test; RT-qPCR; s1 gene; serotype
PP8E3D58	journalArticle	2019	Fontana, Lauren; Strasfeld, Lynne	Respiratory Virus Infections of the Stem Cell Transplant Recipient and the Hematologic Malignancy Patient	Infectious Disease Clinics of North America		0891-5520	10.1016/j.idc.2019.02.004		Respiratory virus infections in hematologic stem cell transplant recipients and patients with hematologic malignancies are increasingly recognized as a cause of significant morbidity and mortality. The often overlapping clinical presentation makes molecular diagnostic strategies imperative for rapid diagnosis and to inform understanding of the changing epidemiology of each of the respiratory viru…	19-Jun	2022/9/19 6:52	2022/9/19 6:52		523-+		2	33		Infect. Dis. Clin. North Am.								English							Place: Philadelphia Publisher: W B Saunders Co-Elsevier Inc WOS:000468857000012				Influenza; Coronavirus; influenza vaccination; Human metapneumovirus; adenovirus infections; aerosolized ribavirin; bronchoalveolar lavage samples; hematopoietic sct recipients; Hematopoietic stem cell transplant; human metapneumovirus infections; inhibitor laninamivir octanoate; Parainfluenza; Respiratory virus infection; Rhinovirus; rsv; sialidase fusion protein; syncytial virus; viral-rna dete…
GUU5RHVA	journalArticle	2019	Hoang, Van-Thuan; Ali-Salem, Saliha; Belhouchat, Khadidja; Meftah, Mohammed; Sow, Doudou; Dao, Thi-Loi; Ly, Tran Duc Anh; Drali, Tassadit; Ninove, Laetitia; Yezli, Saber; Alotaibi, Badriah; Raoult, Didier; Parola, Philippe; de Santi, Vincent Pommier; Gautret, Philippe	Respiratory tract infections among French Hajj pilgrims from 2014 to 2017	Scientific Reports		2045-2322	10.1038/s41598-019-54370-0		Respiratory tract infections (RTIs) are common among Hajj pilgrims, but risk factors for RTIs and respiratory pathogen acquisition during the Hajj are not clearly identified. Based on previous studies, most frequent pathogens acquired by Hajj pilgrims were investigated: rhinovirus, human coronaviruses, influenza viruses, Streptococcus pneumoniae, Staphylococcus aureus, Klebsiella pneumoniae and H…	2019/11/28	2022/9/19 6:52	2022/9/19 6:52		17771			9		Sci Rep								English							Place: London Publisher: Nature Publishing Group WOS:000499668200001				risk; prevalence; viruses; influenza-like illness; nasal carriage; surveillance
MFD2WQB8	journalArticle	2019	Hao, Xin-yan; Lv, Qi; Li, Feng-di; Xu, Yan-feng; Gao, Hong	The characteristics of hDPP4 transgenic mice subjected to aerosol MERS coronavirus infection via an animal nose-only exposure device	Animal Models and Experimental Medicine		2096-5451	10.1002/ame2.12088		BackgroundMiddle East respiratory syndrome coronavirus (MERS-CoV), which is not fully understood in regard to certain transmission routes and pathogenesis and lacks specific therapeutics and vaccines, poses a global threat to public health. MethodsTo simulate the clinical aerosol transmission route, hDPP4 transgenic mice were infected with MERS-CoV by an animal nose-only exposure device and compa…	19-Dec	2022/9/19 6:52	2022/9/19 6:52		269-281		4	2		Anim. Model. Exp. Med.								English							Place: Hoboken Publisher: Wiley WOS:000681665500005				animal nose-only exposure device; hDPP4 transgenic mice; intranasal instillation; MERS-CoV aerosol infection
DI3M8NKF	journalArticle	2019	Cheng, Jinlong; Zhao, Ye; Xu, Gang; Zhang, Keran; Jia, Wenfeng; Sun, Yali; Zhao, Jing; Xue, Jia; Hu, Yanxin; Zhang, Guozhong	The S2 Subunit of QX-type Infectious Bronchitis Coronavirus Spike Protein Is an Essential Determinant of Neurotropism	Viruses-Basel			10.3390/v11100972		Some coronaviruses (CoVs) have an extra furin cleavage site (RRKR/S, furin-S2' site) upstream of the fusion peptide in the spike protein, which plays roles in virion adsorption and fusion. Mutation of the S2' site of QX genotype (QX-type) infectious bronchitis virus (IBV) spike protein (S) in a recombinant virus background results in higher pathogenicity, pronounced neural symptoms and neurotropi…	19-Oct	2022/9/19 6:52	2022/9/19 6:52		972		10	11		Viruses-Basel								English							Place: Basel Publisher: Mdpi WOS:000498400400093				fusion protein; virus; coronavirus; strain; infectious bronchitis virus; avian coronavirus; cells; central-nervous-system; efficacy; encephalitis; furin-S2' site; neurotropism; oc43; pathogenicity differences; QX type; safety
ABV9NDNX	journalArticle	2019	Xu, Zhichao; Lin, Ying; Zou, Chuangchao; Peng, Peng; Wu, Yanan; Wei, Ying; Liu, Yuan; Gong, Lang; Cao, Yongchang; Xue, Chunyi	Attenuation and characterization of porcine enteric alphacoronavirus strain GDSO4 via serial cell passage	Veterinary Microbiology		0378-1135	10.1016/j.vetmic.2019.108489		Porcine enteric alphacoronavirus (PEAV) is a newly identified swine enteropathogenic coronavirus that causes watery diarrhea in newborn piglets. In this study, an original, highly virulent PEAV strain GDS04 was serially passaged in Vero cells. The virus titers and sizes of syncytia increased gradually with the cell passages. Newborn piglets were orally inoculated with PEAVP15,-P67 and P100-Compar…	19-Dec	2022/9/19 6:52	2022/9/19 6:52		108489			239		Vet. Microbiol.								English							Place: Amsterdam Publisher: Elsevier WOS:000504786700020				protein; epidemic diarrhea virus; Attenuation; Genomic analysis; isolate; Newborn piglets; Pathogenicity; Porcine enteric alphacoronavirus; swine-fever virus; transmissible gastroenteritis
JNR6LR2W	journalArticle	2019	Modjarrad, Kayvon; Roberts, Christine C.; Mills, Kristin T.; Castellano, Amy R.; Paolino, Kristopher; Muthumani, Kar; Reuschel, Emma L.; Robb, Merlin L.; Racine, Trina; Oh, Myoung-don; lamarre, Claude; Zaidi, Faraz I.; Boyer, Jean; Kudchodkar, Sagar B.; Jeong, Moonsup; Darden, Janice M.; Park, Young K.; Scott, Paul T.; Remigio, Celine; Parikh, Ajay P.; Wise, Megan C.; Patel, Ami; Duperret, Elizab…	Safety and immunogenicity of an anti-Middle East respiratory syndrome coronavirus DNA vaccine: a phase 1, open-label, single-arm, dose-escalation trial	Lancet Infectious Diseases		1473-3099	10.1016/S1473-3099(19)30266-X		Background Middle East respiratory syndrome (MERS) coronavirus causes a highly fatal lower-respiratory tract infection. There are as yet no licensed MERS vaccines or therapeutics. This study (WRAIR-2274) assessed the safety, tolerability, and immunogenicity of the GLS-5300 MERS coronavirus DNA vaccine in healthy adults. Methods This study was a phase 1, open-label, single-arm, dose-escalation stu…	19-Sep	2022/9/19 6:52	2022/9/19 6:52		1013-1022		9	19		Lancet Infect. Dis.								English							Place: Oxford Publisher: Elsevier Sci Ltd WOS:000484017800033				spike protein; antibodies; responses; efficacy
MQJMP4VG	journalArticle	2019	Lee, Jeong Yoon; Bae, Sojung; Myoung, Jinjong	Middle East respiratory syndrome coronavirus-encoded ORF8b strongly antagonizes IFN-beta promoter activation: its implication for vaccine design	Journal of Microbiology		1225-8873	10.1007/s12275-019-9272-7		Middle East respiratory syndrome coronavirus (MERS-CoV) is a causative agent of severe-to-fatal pneumonia especially in patients with pre-existing conditions, such as smoking and chronic obstructive pulmonary disease (COPD). MERS-CoV transmission continues to be reported in the Saudi Arabian Peninsula since its discovery in 2012. However, it has rarely been epidemic outside the area except one la…	19-Sep	2022/9/19 6:52	2022/9/19 6:52		803-811		9	57		J. Microbiol.								English							Place: Seoul Publisher: Microbiological Society Korea WOS:000482929400010				MERS-CoV; innate immunity; accessory protein; accessory proteins; binding protein; double-stranded-rna; i interferon-production; ikk-related kinases; infection models; interferon beta; messenger-rna; mouse hepatitis-virus; ORF8b; rig-i
IPNVQSPT	journalArticle	2019	Bayraktar, E.; Umar, S.; Yilmaz, A.; Turan, N.; Yilmaz, H.	Current scenario of viral diseases in Turkish poultry industry	Worlds Poultry Science Journal		0043-9339	10.1017/S0043933919000606		The Turkish poultry industry has rapidly developed in the last decade. Viral pathogens continue to threaten the industry, causing economic losses worldwide, including Turkey. At present, infectious bronchitis and infectious laryngotracheitis are major challenges, as are, to a lesser extent, avian metapneumovirus, infectious bursal disease, Marek's disease and chicken infectious anaemia. The preva…	19-Dec	2022/9/19 6:52	2022/9/19 6:52		515-533		4	75		Worlds Poult. Sci. J.								English							Place: Cambridge Publisher: Cambridge Univ Press WOS:000507341200003				epidemiology; influenza; virus; coronavirus; vaccines; chicken; 1st report; avian metapneumovirus ampv; disease; genotype; infectious-bronchitis virus; laryngotracheitis; poultry; Turkey; view 40 years
CFR3LE7L	journalArticle	2019	Lei, Xi-Mei; Yang, Yong-Le; He, Yong-Qiang; Peng, Lei; Zhao, Pengwei; Xu, Shu-Ya; Cao, Hongwei; Fang, Pengfei; Qiu, Wenying; Qin, Pan; Wang, Bin; Huang, Yao-Wei	Specific recombinant proteins of porcine epidemic diarrhea virus are immunogenic, revealing their potential use as diagnostic markers	Veterinary Microbiology		0378-1135	10.1016/j.vetmic.2019.108387		Given the highly contagious and acute nature of porcine epidemic diarrhea (PED), especially in piglets, there is an urgent need for the development of rapid and sensitive diagnostic assays. The diagnostic potentials of specific porcine epidemic diarrhea virus (PEDV) accessory and nonstructural proteins, if any, have not yet been investigated. In order to determine and compare which of the viral p…	19-Sep	2022/9/19 6:52	2022/9/19 6:52		108387			236		Vet. Microbiol.								English							Place: Amsterdam Publisher: Elsevier WOS:000487571700008				coronaviruses; pedv; antibodies; Antibodies; antigenic relationships; Diagnostic antigens; pigs; Porcine epidemic diarrhea virus; reactivity; Serological assay; serum
2XB65EAK	journalArticle	2019	Suryaman, G. K.; Soejoedono, R. D.; Setiyono, A.; Poetri, O. N.; Handharyani, E.	Isolation and characterization of avian coronavirus from healthy Eclectus parrots (Eclectus roratus) from Indonesia	Veterinary World		0972-8988	10.14202/vetworld.2019.1797-1805		Background and Aim: Avian coronavirus has a wide range of hosts, from chickens and turkeys to wild birds. This virus causes an economically and, possibly, environmentally, important loss in the poultry industry. Therefore, research into the avian coronavirus in various species of birds is required. The Eclectus parrot (Eclectus roratus) is an endemic bird to Indonesia and Northern Australia and o…	19-Nov	2022/9/19 6:52	2022/9/19 6:52		1797-1805		11	12		Vet. World								English							Place: Gujarat Publisher: Veterinary World WOS:000500712600010				influenza; identification; s1 gene; infectious-bronchitis virus; poultry; Avian coronavirus; birds; Eclectus parrot; Infectious bronchitis; spillover
WGY4BKZM	journalArticle	2019	Gu, Wen-yuan; Li, Yan; Liu, Bao-jing; Wang, Jing; Yuan, Guang-fu; Chen, Shao-jie; Zuo, Yu-Zhu; Fan, Jing-Hui	Short hairpin RNAs targeting M and N genes reduce replication of porcine deltacoronavirus in ST cells	Virus Genes		0920-8569	10.1007/s11262-019-01701-y		Porcine deltacoronavirus (PDCoV) is a recently identified coronavirus that causes intestinal diseases in neonatal piglets with diarrhea, vomiting, dehydration, and post-infection mortality of 50-100%. Currently, there are no effective treatments or vaccines available to control PDCoV. To study the potential of RNA interference (RNAi) as a strategy against PDCoV infection, two short hairpin RNA (s…	19-Dec	2022/9/19 6:52	2022/9/19 6:52		795-801		6	55		Virus Genes								English							Place: Dordrecht Publisher: Springer WOS:000494483500005				prevalence; diarrhea; infection; virus; nucleocapsid protein; identification; inhibition; pigs; Nucleocapsidgene; Porcine deltacoronavirus; RNA interference; Short hairpin RNA; Swine testicular cells
VCWZZDF4	journalArticle	2019	Luteijn, Rutger D.; van Diemen, Ferdy; Blomen, Vincent A.; Boer, Ingrid G. J.; Sadasivam, Saravanan Manikam; van Kuppevelt, Toin H.; Drexler, Ingo; Brummelkamp, Thijn R.; Lebbink, Robert Jan; Wiertz, Emmanuel J.	A Genome-Wide Haploid Genetic Screen Identifies Heparan Sulfate-Associated Genes and the Macropinocytosis Modulator TMED10 as Factors Supporting Vaccinia Virus Infection	Journal of Virology		0022-538X	10.1128/JVI.02160-18		Vaccinia virus is a promising viral vaccine and gene delivery candidate and has historically been used as a model to study poxvirus-host cell interactions. We employed a genome-wide insertional mutagenesis approach in human haploid cells to identify host factors crucial for vaccinia virus infection. A library of mutagenized HAP1 cells was exposed to modified vaccinia virus Ankara (MVA). Deep-sequ…	19-Jul	2022/9/19 6:52	2022/9/19 6:52		e02160-18		13	93		J. Virol.								English							Place: Washington Publisher: Amer Soc Microbiology WOS:000471760000035				protein; cell entry; ankara mva; apoptotic mimicry; binds; entry requires; genome-wide screen; heparan sulfate; in-vitro; intracellular mature virion; kinase-c; macropinocytosis; molecular-cloning; phosphatidylserine; poxvirus; tmed10; vaccinia virus
BTANVGBJ	journalArticle	2019	Giersing, Birgitte K.; Vekemans, Johan; Nava, Samantha; Koslow, David C.; Moorthy, Vasee; Abdulla, Salim; Bavdekar, Ashish; Cichutek, Klaus; Cravioto, Alejandro; Fritzell, Bernard; Graham, Barney S.; Karron, Ruth A.; Lanata, Claudio F.; Shao, Yiming; Smith, Peter G.	Report from the World Health Organization's third Product Development for Vaccines Advisory Committee (PDVAC) meeting, Geneva, 8-10th June 2016	Vaccine		0264-410X	10.1016/j.vaccine.2016.10.090		The third meeting of WHO's Product Development for Vaccines Advisory Committee (PDVAC) was held in June 2016, with a remit to revisit the pathogen areas for which significant progress has occurred since recommendations from the 2015 meeting, as well as to consider new advances in the development of vaccines against other pathogens. Since the previous meeting, significant progress has been made wi…	2019/11/28	2022/9/19 6:52	2022/9/19 6:52		7315-7327		50	37		Vaccine								English							Place: Oxford Publisher: Elsevier Sci Ltd WOS:000501402100005				Vaccine; mortality; immunogenicity; efficacy; safety; Bacterial; candidate; children; clostridium-difficile infection; enterovirus 71 vaccine; LMICs; pdvac; Product development; research-and-development; roadmap; sage; Viral
UREUMH32	journalArticle	2019	Castells, Matias; Giannitti, Federico; Caffarena, Ruben Dario; Casaux, Maria Laura; Schild, Carlos; Castells, Daniel; Riet-Correa, Franklin; Victoria, Matias; Parreno, Viviana; Colina, Rodney	Bovine coronavirus in Uruguay: genetic diversity, risk factors and transboundary introductions from neighboring countries	Archives of Virology		0304-8608	10.1007/s00705-019-04384-w		Bovine coronavirus (BCoV) is a recognized cause of severe neonatal calf diarrhea, with a negative impact on animal welfare, leading to economic losses to the livestock industry. Cattle production is one of the most important economic sectors in Uruguay. The aim of this study was to determine the frequency of BCoV infections and their genetic diversity in Uruguayan calves and to describe the evolu…	19-Nov	2022/9/19 6:52	2022/9/19 6:52		2715-2724		11	164		Arch. Virol.								English							Place: Wien Publisher: Springer Wien WOS:000488510500008				diarrhea; reveals; beef; calf; calves; cattle; dairy; etiology; morbidity; rotavirus
EV7UT77D	journalArticle	2019	Zhu, Tongjia; Du, Shuaishuai; Gao, Dongmei; Pei, Zhihua; Guo, Yanbing; Shao, Hongze; Wang, Haijun; Wang, Kai; Hu, Guixue	Isolation and identification of a variant subtype G 2b porcine epidemic diarrhea virus and S gene sequence characteristic	Infection Genetics and Evolution		1567-1348	10.1016/j.meegid.2019.03.015		Porcine epidemic diarrhea (PED) which is caused by porcine epidemic diarrhea virus (PEDV), is an intestinal communicable disease. In recent years, though pigs have been immunized with the vaccines in pig farms, PED still broke out and caused severe economic losses to the swine industry in the northeast China. In this study, the sample was positive for PEDV variant strains via the nano-nest PCR. T…	19-Jul	2022/9/19 6:52	2022/9/19 6:52		82-90			71		Infect. Genet. Evol.								English							Place: Amsterdam Publisher: Elsevier Science Bv WOS:000465457800014				infection; coronavirus; strain; pathogenicity; Genetic analysis; Identification; Isolation; outbreak; Porcine epidemic diarrhea virus (PEDV); propagation
IT42IBHV	journalArticle	2019	Hoffmann, Markus; Kaufmann, Svenja Victoria; Fischer, Carina; Maurer, Wiebke; Moldenhauer, Anna-Sophie; Poehlmann, Stefan	Analysis of Resistance of Ebola Virus Glycoprotein-Driven Entry Against MDL28170, An Inhibitor of Cysteine Cathepsins	Pathogens			10.3390/pathogens8040192		Ebola virus (EBOV) infection can cause severe and frequently fatal disease in human patients. The EBOV glycoprotein (GP) mediates viral entry into host cells. For this, GP depends on priming by the pH-dependent endolysosomal cysteine proteases cathepsin B (CatB) and, to a lesser degree, cathepsin L (CatL), at least in most cell culture systems. However, there is limited information on whether and…	19-Dec	2022/9/19 6:52	2022/9/19 6:52		192		4	8		Pathogens								English							Place: Basel Publisher: Mdpi WOS:000506652300035				vaccine; infection; respiratory syndrome coronavirus; cathepsin; cellular entry; dc-sign; Ebola; fusion; glycoprotein; macrophages; proteolysis; requires; small-molecule
KBSI3NMS	journalArticle	2019	Lin, Leon Chien-Wei; Huang, Chen-Yu; Yao, Bing-Yu; Lin, Jung-Chen; Agrawal, Anurodh; Algaissi, Abdullah; Peng, Bi-Hung; Liu, Yu-Han; Huang, Ping-Han; Juang, Rong-Huay; Chang, Yuan-Chih; Tseng, Chien-Te; Chen, Hui-Wen; Hu, Che-Ming Jack	Viromimetic STING Agonist-Loaded Hollow Polymeric Nanoparticles for Safe and Effective Vaccination against Middle East Respiratory Syndrome Coronavirus	Advanced Functional Materials		1616-301X	10.1002/adfm.201807616		The continued threat of emerging, highly lethal infectious pathogens such as Middle East respiratory syndrome coronavirus (MERS-CoV) calls for the development of novel vaccine technology that offers safe and effective prophylactic measures. Here, a novel nanoparticle vaccine is developed to deliver subunit viral antigens and STING agonists in a virus-like fashion. STING agonists are first encapsu…	19-Jul	2022/9/19 6:52	2022/9/19 6:52		1807616		28	29		Adv. Funct. Mater.								English							Place: Weinheim Publisher: Wiley-V C H Verlag Gmbh WOS:000478851700003				neutralizing antibodies; receptor-binding domain; spike protein; immune-responses; antigen presentation; cdGMP adjuvant; cyclic gmp-amp; dendritic cells; hollow nanoparticle; i interferon; Middle East respiratory syndrome coronavirus; mouse model; sting; t-cell responses; virus mimicry
5H9EME3R	journalArticle	2019	Xu, Jiuyang; Jia, Wenxu; Wang, Pengfei; Zhang, Senyan; Shi, Xuanling; Wang, Xinquan; Zhang, Linqi	Antibodies and vaccines against Middle East respiratory syndrome coronavirus	Emerging Microbes & Infections			10.1080/22221751.2019.1624482		The Middle East respiratory syndrome coronavirus (MERS-CoV) has spread through 27 countries and infected more than 2,200 people since its first outbreak in Saudi Arabia in 2012. The high fatality rate (35.4%) of this novel coronavirus and its persistent wide spread infectiousness in animal reservoirs have generated tremendous global public health concern. However, no licensed therapeutic agents o…	2019/6/6	2022/9/19 6:52	2022/9/19 6:52		841-856		1	8		Emerg. Microbes Infect.								English							Place: Abingdon Publisher: Taylor & Francis Ltd WOS:000473826700002				vaccine; Coronavirus; monoclonal antibody; mers-cov; receptor-binding domain; MERS-CoV; spike protein; immune-responses; mouse model; t-cell responses; dipeptidyl peptidase 4; human monoclonal-antibody; humanized neutralizing antibody; postexposure efficacy; spike glycoprotein
I5G6SE97	journalArticle	2019	Dina, Adam M.; Keep, Sarah; Bickerton, Erica; Britton, Paul; Firth, Andrew E.; Brierley, Ian	Comparative Analysis of Gene Expression in Virulent and Attenuated Strains of Infectious Bronchitis Virus at Subcodon Resolution	Journal of Virology		0022-538X	10.1128/JVI.00714-19		Like all coronaviruses, avian infectious bronchitis virus (IBV) possesses a long, single-stranded, positive-sense RNA genome (similar to 27 kb) and has a complex replication strategy that includes the production of a nested set of subgenomic mRNAs (sgmRNAs). Here, we used whole-transcriptome sequencing (RNASeq) and ribosome profiling (RiboSeq) to delineate gene expression in the IBV M41-CK and Be…	19-Sep	2022/9/19 6:52	2022/9/19 6:52		e00714-19		18	93		J. Virol.								English							Place: Washington Publisher: Amer Soc Microbiology WOS:000483427300018				replication; spike protein; identification; avian coronavirus; differential gene expression; genome; in-vivo; localization; ribosome profiling; RNA virus; RNASeq; sequence; subgenomic messenger-rna; translation
QVHXVIPA	journalArticle	2019	Shen, Zhou; Wang, Gang; Yang, Yiling; Shi, Jiale; Fang, Liurong; Li, Fang; Xiao, Shaobo; Fu, Zhen F.; Peng, Guiqing	A conserved region of nonstructural protein 1 from alphacoronaviruses inhibits host gene expression and is critical for viral virulence	Journal of Biological Chemistry		0021-9258	10.1074/jbc.RA119.009713		Coronaviruses are enveloped, single-stranded RNA viruses that are distributed worldwide. They include transmissible gastroenteritis virus (TGEV), porcine epidemic diarrhea virus (PEDV), and the human coronaviruses severe acute respiratory syndrome coronavirus (SARS-CoV) and Middle East respiratory syndrome coronavirus (MERS-CoV), many of which seriously endanger human health and well-being. Only …	2019/9/13	2022/9/19 6:52	2022/9/19 6:52		13606-13618		37	294		J. Biol. Chem.								English							Place: Rockville Publisher: Amer Soc Biochemistry Molecular Biology Inc WOS:000486418600008				pathogenesis; virus; replication; coronavirus; immunization; epidemic diarrhea virus; respiratory syndrome coronavirus; rna; binding protein; i interferon; crystal structure; host gene expression; immune evasion; nonstructural protein 1 (nsp1); nsp1 proteins; protein motif; rational design; transmissible gastroenteritis virus (TGEV); virulence factor
ZLFIKHLD	journalArticle	2019	Albratty, Mohammed; El-Sharkawy, Karam Ahmed; Alhazmi, Hassan Ahmed	Synthesis and evaluation of some new 1,3,4-oxadiazoles bearing thiophene, thiazole, coumarin, pyridine and pyridazine derivatives as antiviral agents	Acta Pharmaceutica		1330-0075			In an attempt to produce heterocyclic compounds based on 1,3,4-oxadiazole derivatives with potential antiviral activity, synthesis of compound 1 [2-(5-thioxo-4,5-dihydro-1,3,4-oxadiazol2-yl)acetonitrile] was performed through the reaction of cyanoacetic acid hydrazide with carbon disulfide in alcoholic potassium hydroxide. Compound 1 has an activating methylene group, so it was directed toward so…	19-Jun	2022/9/19 6:52	2022/9/19 6:52		261-276		2	69		Acta Pharm.								English							Place: Zagreb Publisher: Hrvatsko Farmaceutsko Drustov (hfd)-Croation Pharmaceutical Soc WOS:000463001400008				1,3,4-oxadiazole derivatives; anticancer; antiviral activity; biological evaluation; coumarin; design; inhibitors; moiety; molecular docking; pyrazole; pyridazine; pyridine; pyrimidine; thiazole; thiophene
SIUWJMHZ	journalArticle	2019	Rohaim, Mohammed A.; El Naggar, Rania F.; Hamoud, Mohamed M.; Bazid, Abdel-Hamid; Gamal, Abdulrhman M.; Laban, Samah E.; Abdel-Sabour, Mohammed A.; Nasr, Shimaa A. E.; Zaki, Manal M.; Shabbir, Muhammad Z.; Zahran, Osama K.; Munir, Muhammad	Emergence and genetic analysis of variant pathogenic 4/91 (serotype 793/B) infectious bronchitis virus in Egypt during 2019	Virus Genes		0920-8569	10.1007/s11262-019-01693-9		Infectious bronchitis virus (IBV) affects both vaccinated and unvaccinated flocks worldwide, with a significant impact on the poultry industry. The aim of the present study is to characterize an emerging variant pathogenic IBV originating from field outbreaks in vaccinated Egyptian layer flock. Samples were collected from disease-suspected flock with a history of administration of live and inacti…	19-Oct	2022/9/19 6:52	2022/9/19 6:52		720-725		5	55		Virus Genes								English							Place: Dordrecht Publisher: Springer WOS:000486222300017				coronavirus; Infectious bronchitis virus; molecular characterization; recombination; genotype; glycoprotein; sequence; broiler; Curling and dwarfism; Emergence; hypervariable region; Identity; Monitoring; proteins; Recombination; s1 spike
FKM8TRER	journalArticle	2019	Franzo, Giovanni; Legnardi, Matteo; Tucciarone, Claudia Maria; Drigo, Michele; Martini, Marco; Cecchinato, Mattia	Evolution of infectious bronchitis virus in the field after homologous vaccination introduction	Veterinary Research		0928-4249	10.1186/s13567-019-0713-4		Despite the fact that vaccine resistance has been typically considered a rare phenomenon, some episodes of vaccine failure have been reported with increasing frequency in intensively-raised livestock. Infectious bronchitis virus (IBV) is a widespread avian coronavirus, whose control relies mainly on extensive vaccine administration. Unfortunately, the continuous emergence of new vaccine-immunity …	2019/11/9	2022/9/19 6:52	2022/9/19 6:52		92		1	50		Vet. Res.								English							Place: London Publisher: Bmc WOS:000495694400001				epidemiology; protein; strain; vaccines; antigenic epitopes; identification; protection; efficacy; alignment; population-genetics
7BQG79SK	journalArticle	2019	Zhao, Ye; Xie, Deqiong; Zhang, Keran; Cheng, Jinlong; Xu, Gang; Zhang, Guozhong	Pathogenicity of a GI-22 genotype infectious bronchitis virus isolated in China and protection against it afforded by GI-19 vaccine	Virus Research		0168-1702	10.1016/j.virusres.2019.05.006		Avian infectious bronchitis (IB) is a globally circulating bird disease caused by infectious bronchitis virus (IBV). In China, the most prevalent IBV genotype is GI-19/QX-like because the protective efficiency of the classical IBV vaccine is low, and new GI-19 vaccines are under development. In 2018, a GI-22 genotype strain CK/CH/LGD/2018 (abbreviated 'LGD') was isolated in northern China, which …	2019/7/2	2022/9/19 6:52	2022/9/19 6:52		59-66			267		Virus Res.								English							Place: Amsterdam Publisher: Elsevier Science Bv WOS:000470943500009				coronavirus; Infectious bronchitis virus; strains; efficacy; safety; Pathogenicity; antigenicity; GI-22 genotype; Protective efficiency; qx-like
UAQZZNBI	journalArticle	2019	Pauly, Maude; Snoeck, Chantal J.; Phoutana, Vannaphone; Keosengthong, Amphone; Sausy, Aurelie; Khenkha, Latdavone; Nouanthong, Phonethipsavanh; Samountry, Bounthome; Jutavijittum, Prapan; Vilivong, Keooudomphone; Hubschen, Judith M.; Black, Antony P.; Pommasichan, Sisavath; Muller, Claude P.	Cross-species transmission of poultry pathogens in backyard farms: ducks as carriers of chicken viruses	Avian Pathology		0307-9457	10.1080/03079457.2019.1628919		In backyard farms of Lao People's Democratic Republic, mixed-species rearing of poultry is a breeding-ground for cross-species transmission. Here, the epidemiology of viruses circulating among backyard poultry in Vientiane Province was assessed to guide future control strategies. Oral/tracheal and cloacal swabs, collected from 605 poultry (308 ducks, 297 chickens) between 2011 and 2015, were scre…	2019/11/2	2022/9/19 6:52	2022/9/19 6:52		503-511		6	48		Avian Pathol.								English							Place: Abingdon Publisher: Taylor & Francis Ltd WOS:000478512600001				coronavirus; chicken; infectious-bronchitis virus; anemia virus; bird health; cav; duck; evolution; Laos; molecular epidemiology; Poultry diseases; sequence alignment; smallholders; tissues
A4HD4JGD	journalArticle	2020	Li, Yao-Tsun; Chen, Ting-Chih; Lin, Shu-Yi; Mase, Masaji; Murakami, Shin; Horimoto, Taisuke; Chen, Hui-Wen	Emerging lethal infectious bronchitis coronavirus variants with multiorgan tropism	Transboundary and Emerging Diseases		1865-1674	10.1111/tbed.13412		Infectious bronchitis virus (IBV) causes respiratory diseases in chickens and poses an economic threat to the poultry industry worldwide. Despite vaccine use, there have been field outbreaks of IBV in Taiwan. This study aimed to characterize the emerging IBV variants circulating in Taiwan. The analysis of the structural protein genes showed that these variants emerged through frequent recombinati…	20-Mar	2022/9/19 6:52	2022/9/19 6:52		884-893		2	67		Transbound. Emerg. Dis.								English							Place: Hoboken Publisher: Wiley WOS:000497264100001				virus; strain; identification; pathogenicity; infectious bronchitis virus; s1 gene; serotype; genotype; antigenicity; comparative genomics; japan; multiorgan tropism; pathotype; recombinant variants
VNKSF9Y5	journalArticle	2019	Lu, Dan; Liu, Kefang; Zhang, Di; Yue, Can; Lu, Qiong; Cheng, Hao; Wang, Liang; Chai, Yan; Qi, Jianxun; Wang, Lin-Fa; Gao, George F.; Liu, William J.	Peptide presentation by bat MHC class I provides new insight into the antiviral immunity of bats	Plos Biology		1544-9173	10.1371/journal.pbio.3000436		Bats harbor many zoonotic viruses, including highly pathogenic viruses of humans and other mammals, but they are typically asymptomatic in bats. To further understand the antiviral immunity of bats, we screened and identified a series of bat major histocompatibility complex (MHC) I Ptal-N*01:01-binding peptides derived from four different bat-borne viruses, i.e., Hendra virus (HeV), Ebola virus (…	19-Sep	2022/9/19 6:52	2022/9/19 6:52		e3000436		9	17		PLoS. Biol.								English							Place: San Francisco Publisher: Public Library Science WOS:000496470000005				virus; crystal-structure; population; sequence; evolution; epitopes; features; host; reservoirs; t-cell
IGCQ6UVL	journalArticle	2019	Kato, Tatsuya; Takami, Yoshihiro; Deo, Vipin Kumar; Park, Enoch Y.	Preparation of virus-like particle mimetic nanovesicles displaying the S protein of Middle East respiratory syndrome coronavirus using insect cells	Journal of Biotechnology		0168-1656	10.1016/j.jbiotec.2019.10.007		Middle East respiratory syndrome coronavirus (MERS-CoV) first emerged in 2012, and over 2000 infections and 800 deaths have been confirmed in 27 countries. However, to date, no commercial vaccine is available. In this study, structural proteins of MERS-CoV were expressed in silkworm larvae and Bm5 cells for the development of vaccine candidates against MERS-CoV and diagnostic methods. The spike (…	2019/12/20	2022/9/19 6:52	2022/9/19 6:52		177-184			306		J. Biotechnol.								English							Place: Amsterdam Publisher: Elsevier WOS:000496193800022				Vaccine; Coronavirus; Middle East respiratory syndrome; expression; Bm5 cell; delivery; nanoparticles; release; retrieval signal; silkworm; Silkworm; Virus-like particle
NZPMTGB5	journalArticle	2019	Park, Young-Jun; Walls, Alexandra C.; Wang, Zhaoqian; Sauer, Maximillian M.; Li, Wentao; Tortorici, M. Alejandra; Bosch, Berend-Jan; DiMaio, Frank; Veesler, David	Structures of MERS-CoV spike glycoprotein in complex with sialoside attachment receptors	Nature Structural & Molecular Biology		1545-9993	10.1038/s41594-019-0334-7		The Middle East respiratory syndrome coronavirus (MERS-CoV) causes severe and often lethal respiratory illness in humans, and no vaccines or specific treatments are available. Infections are initiated via binding of the MERS-CoV spike (S) glycoprotein to sialosides and dipeptidyl-peptidase 4 (the attachment and entry receptors, respectively). To understand MERS-CoV engagement of sialylated recept…	19-Dec	2022/9/19 6:52	2022/9/19 6:52		1151-+		12	26		Nat. Struct. Mol. Biol.								English							Place: New York Publisher: Nature Publishing Group WOS:000501349100012				infection; binding; respiratory syndrome coronavirus; entry; humans; influenza-virus; microscopy; model; susceptibility; validation
4F3UE7NI	journalArticle	2019	Zhai, Xiaofeng; Wang, Shilei; Zhu, Mengyan; He, Wei; Pan, Zhongzhou; Su, Shuo	Antiviral Effect of Lithium Chloride and Diammonium Glycyrrhizinate on Porcine Deltacoronavirus In Vitro	Pathogens			10.3390/pathogens8030144		Porcine deltacoronavirus (PDCoV) is an emerging global swine virus that has a propensity for interspecies transmission. It was identified in Hong Kong in 2012. Given that neither specific antiviral drugs nor vaccines are available for newly emerging porcine deltacoronavirus, searching for effective antiviral drugs is a high priority. In this study, lithium chloride (LiCl) and diammonium glycyrrhi…	19-Sep	2022/9/19 6:52	2022/9/19 6:52		144		3	8		Pathogens								English							Place: Basel Publisher: Mdpi WOS:000488003600028				ribavirin; replication; coronavirus; discovery; functional receptor; recombination; apoptosis; diammonium glycyrrhizinate; drugs; lithium chloride; mechanisms; PDCoV; virus-infection
42LTT8TD	journalArticle	2019	Fan, Wensheng; Tang, Ning; Dong, Zhihua; Chen, Jiming; Zhang, Wen; Zhao, Changrun; He, Yining; Li, Meng; Wu, Cuilan; Wei, Tianchao; Huang, Teng; Mo, Meilan; Wei, Ping	Genetic Analysis of Avian Coronavirus Infectious Bronchitis Virus in Yellow Chickens in Southern China over the Past Decade: Revealing the Changes of Genetic Diversity, Dominant Genotypes, and Selection Pressure	Viruses-Basel			10.3390/v11100898		The high mutation rates of infectious bronchitis virus (IBV) pose economic threats to the poultry industry. In order to track the genetic evolutionary of IBV isolates circulating in yellow chickens, we continued to conduct the genetic analyses of the structural genes S1, E, M, and N from 64 IBV isolates in southern China during 2009-2017. The results showed that the dominant genotypes based on th…	19-Oct	2022/9/19 6:52	2022/9/19 6:52		898		10	11		Viruses-Basel								English							Place: Basel Publisher: Mdpi WOS:000498400400019				spike; molecular characterization; infectious bronchitis virus; recombination; subpopulations; s1 gene; genotype; glycoprotein; qx-like; evolution; complete genome sequences; entropy; ibv qx; molecular evolutionary rate; recombinant; selection pressure
9VZ7M2DR	journalArticle	2019	Li, Entao; Chi, Hang; Huang, Pei; Yan, Feihu; Zhang, Ying; Liu, Chuanyu; Wang, Zhenshan; Li, Guohua; Zhang, Shengnan; Mo, Ruo; Jin, Hongli; Wang, Hualei; Feng, Na; Wang, Jianzhong; Bi, Yuhai; Wang, Tiecheng; Sun, Weiyang; Gao, Yuwei; Zhao, Yongkun; Yang, Songtao; Xia, Xianzhu	A Novel Bacterium-Like Particle Vaccine Displaying the MERS-CoV Receptor-Binding Domain Induces Specific Mucosal and Systemic Immune Responses in Mice	Viruses-Basel			10.3390/v11090799		Middle East respiratory syndrome coronavirus (MERS-CoV), a new coronavirus that has been causing severe and fatal acute respiratory illnesses in humans since its outbreak in 2012, has raised public fear worldwide. The development of prophylactics and therapeutics is urgently needed to prevent and control MERS-CoV infections. In this study, a bacterium (Lactococcus lactis)-like particle (BLP) vacc…	19-Sep	2022/9/19 6:52	2022/9/19 6:52		799		9	11		Viruses-Basel								English							Place: Basel Publisher: Mdpi WOS:000487962400030				immunogenicity; virus; MERS-CoV; coronavirus; immunization; intranasal; protective immunity; spike protein; candidate; bacterium-like particles; intranasal administration; lactococcus-lactis; lysm; mucosal immune; subunit vaccine
6U7BTXC8	journalArticle	2019	Kato, Hirofumi; Takayama-Ito, Mutsuyo; Iizuka-Shiota, Itoe; Fukushi, Shuetsu; Posadas-Herrera, Guillermo; Horiya, Madoka; Satoh, Masaaki; Yoshikawa, Tomoki; Yamada, Souichi; Harada, Shizuko; Fujii, Hikaru; Shibamura, Miho; Inagaki, Takuya; Morimoto, Kinjiro; Saijo, Masayuki; Lim, Chang-Kweng	Development of a recombinant replication-deficient rabies virus-based bivalent-vaccine against MERS-CoV and rabies virus and its humoral immunogenicity in mice	Plos One		1932-6203	10.1371/journal.pone.0223684		Middle East respiratory syndrome-coronavirus (MERS-CoV) is an emerging virus that causes severe disease with fatal outcomes; however, there are currently no approved vaccines or specific treatments against MERS-CoV. Here, we developed a novel bivalent vaccine against MERS-CoV and rabies virus (RV) using the replication-incompetent P-gene deficient RV (RV Delta P), which has been previously establ…	2019/10/7	2022/9/19 6:52	2022/9/19 6:52		e0223684		10	14		PLoS One								English							Place: San Francisco Publisher: Public Library Science WOS:000532427300035				neutralizing antibody; receptor-binding domain; respiratory syndrome coronavirus; s-protein; immune-responses; glycoprotein; dromedary camels; single immunization; spike protein; type-1 gag
CVZSIKN5	journalArticle	2019	Lin, Jian; Wang, Zhisheng; Wang, Jialu; Yang, Qian	Microarray analysis of infectious bronchitis virus infection of chicken primary dendritic cells	Bmc Genomics		1471-2164	10.1186/s12864-019-5940-6		BackgroundAvian infectious bronchitis virus (IBV) is a major respiratory disease-causing agent in birds that leads to significant losses. Dendritic cells (DCs) are specialised cells responsible for sampling antigens and presenting them to T cells, which also play an essential role in recognising and neutralising viruses. Recent studies have suggested that non-coding RNAs may regulate the function…	2019/7/8	2022/9/19 6:52	2022/9/19 6:52		557			20		BMC Genomics								English							Place: London Publisher: Bmc WOS:000475531900007				mRNA; replication; Infectious bronchitis virus; immune-responses; dc-sign; influenza-virus; avian coronavirus; bursal disease virus; Dendritic cells; genome characterization; innate; lncRNA; microRNA; micrornas; vaccine strains
CA8UXEA7	journalArticle	2019	Shi, Da; Wang, Xiaobo; Shi, Hongyan; Zhang, Jiyu; Han, Yuru; Chen, Jianfei; Zhang, Xin; Liu, Jianbo; Zhang, Jialin; Ji, Zhaoyang; Jing, Zhaoyang; Feng, Li	Significant Interference with Porcine Epidemic Diarrhea Virus Pandemic and Classical Strain Replication in Small-Intestine Epithelial Cells Using an shRNA Expression Vector	Vaccines			10.3390/vaccines7040173		Porcine epidemic diarrhea (PED) re-emerged in China in 2010 and is now widespread. Evidence indicates that highly virulent porcine epidemic diarrhea virus (PEDV) strains belonging to genotype G2 caused a large-scale outbreak of diarrhea. Currently, vaccines derived from PEDV classical strains do not effectively prevent infection by virulent PEDV strains, and no specific drug is available to treat…	19-Dec	2022/9/19 6:52	2022/9/19 6:52		173		4	7		Vaccines								English							Place: Basel Publisher: Mdpi WOS:000505709700036				nucleocapsid protein; rna; RNA interference; intestine epithelial cells; mice; N gene; porcine epidemic diarrhea virus; processivity factor; x-protein
7PE759GN	journalArticle	2019	Shehata, Mahmoud M.; Kandeil, Ahmed; Mostafa, Ahmed; Mahmoud, Sara H.; Gomaa, Mokhtar R.; El-Shesheny, Rabeh; Webby, Richard; Kayali, Ghazi; Ali, Mohamed A.	A Recombinant Influenza A/H1N1 Carrying A Short Immunogenic Peptide of MERS-CoV as Bivalent Vaccine in BALB/c Mice	Pathogens			10.3390/pathogens8040281		Middle East Respiratory Syndrome Coronavirus (MERS-CoV) became a global human health threat since its first documentation in humans in 2012. An efficient vaccine for the prophylaxis of humans in hotspots of the infection (e.g., Saudi Arabia) is necessary but no commercial vaccines are yet approved. In this study, a chimeric DNA construct was designed to encode an influenza A/H1N1 NA protein which…	19-Dec	2022/9/19 6:52	2022/9/19 6:52		281		4	8		Pathogens								English							Place: Basel Publisher: Mdpi WOS:000506652300124				antibody; influenza vaccine; receptor-binding domain; MERS-CoV; coronavirus; immunization; spike protein; generation; t-cell responses; a virus; egypt; H1N1pdm; reverse genetics; segment
4RPQZCGN	journalArticle	2019	Farsang, Attila; Bodi, Ildiko; Folker, Orsolya; Minko, Krisztina; Benyeda, Zsofia; Balint, Adam; Olah, Imre	AVIAN CORONAVIRUS INFECTION INDUCES MANNOSE-BINDING LECTIN PRODUCTION IN DENDRITIC CELL PRECURSORS OF CHICKEN LYMPHOID ORGANS	Acta Veterinaria Hungarica		0236-6290	10.1556/004.2019.020		The aim of this immunocytochemical study was to compare mannose-binding lectin (MBL) production induced by avian coronavirus in the spleen and caecal tonsil (CT). One-day-old specific-pathogen-free (SPF) chickens were experimentally infected with six QX field isolates and the H120 vaccine strain. In the negative control birds, the spleen was MBL negative, while the CT showed scattered MBL-positiv…	19-Jun	2022/9/19 6:52	2022/9/19 6:52		183-196		2	67		Acta Vet. Hung.								English							Place: Budapest Publisher: Akademiai Kiado Zrt WOS:000472993900003				pathogenesis; Avian coronavirus; susceptibility; bronchitis virus; caecal tonsil; cd83; lymphocytes; mannose-binding lectin; marker; maturation; mbl; migration; precursor of follicular dendritic cell; spleen
2B27LDMW	journalArticle	2019	Channappanavar, Rudragouda; Fehr, Anthony R.; Zheng, Jian; Wohlford-Lenane, Christine; Abrahante, Juan E.; Mack, Matthias; Sompallae, Ramakrishna; McCray, Paul B.; Meyerholz, David K.; Perlman, Stanley	IFN-I response timing relative to virus replication determines MERS coronavirus infection outcomes	Journal of Clinical Investigation		0021-9738	10.1172/JCI126363		Type 1 IFNs (IFN-I) generally protect mammalian hosts from virus infections, but in some cases, IFN-I is pathogenic. Because IFN-I is protective, it is commonly used to treat virus infections for which no specific approved drug or vaccine is available. The Middle East respiratory syndrome-coronavirus (MERS-CoV) is such an infection, yet little is known about the role of IFN-I in this setting. Her…	2019/9/3	2022/9/19 6:52	2022/9/19 6:52		3625-3639		9	129		J. Clin. Invest.								English							Place: Ann Arbor Publisher: Amer Soc Clinical Investigation Inc WOS:000484368600022				interferon; sars; expression; respiratory syndrome coronavirus; immune-responses; mouse hepatitis-virus; macrophages; clonal expansion; lung pathology; t-cell responses
KB6TXS3E	journalArticle	2019	Hui, David S. C.; Zumla, Alimuddin	Severe Acute Respiratory Syndrome Historical, Epidemiologic, and Clinical Features	Infectious Disease Clinics of North America		0891-5520	10.1016/j.idc.2019.07.001		Severe acute respiratory syndrome coronavirus (SARS-CoV), emerged from China and rapidly spread worldwide. Over 8098 people fell ill and 774 died before the epidemic ended in July 2003. Bats are likely an important reservoir for SARS-CoV. SARS-like CoVs have been detected in horseshoe bats and civet cats. The main mode of transmission of SARS-CoV is through inhalation of respiratory droplets. Fae…	19-Dec	2022/9/19 6:52	2022/9/19 6:52		869-+		4	33		Infect. Dis. Clin. North Am.								English							Place: Philadelphia Publisher: W B Saunders Co-Elsevier Inc WOS:000498311500002				Epidemiology; Coronavirus; Epidemic; Prevention; convalescent plasma; sars; functional receptor; cell responses; lung pathology; Clinical; disease severity; dna vaccine; genome sequence; hong-kong; sars coronavirus rna; viral load
YV54W9UM	journalArticle	2020	Sekimukai, Hanako; Iwata-Yoshikawa, Naoko; Fukushi, Shuetsu; Tani, Hideki; Kataoka, Michiyo; Suzuki, Tadaki; Hasegawa, Hideki; Niikura, Kenichi; Arai, Katsuhiko; Nagata, Noriyo	Gold nanoparticle-adjuvanted S protein induces a strong antigen-specific IgG response against severe acute respiratory syndrome-related coronavirus infection, but fails to induce protective antibodies and limit eosinophilic infiltration in lungs	Microbiology and Immunology		0385-5600	10.1111/1348-0421.12754		The spike (S) protein of coronavirus, which binds to cellular receptors and mediates membrane fusion for cell entry, is a candidate vaccine target for blocking coronavirus infection. However, some animal studies have suggested that inadequate immunization against severe acute respiratory syndrome coronavirus (SARS-CoV) induces a lung eosinophilic immunopathology upon infection. The present study …	20-Jan	2022/9/19 6:52	2022/9/19 6:52		33-51		1	64		Microbiol. Immunol.								English							Place: Hoboken Publisher: Wiley WOS:000496882400001				vaccine; adjuvant; neutralizing antibodies; receptor-binding domain; t-cells; coronavirus; spike protein; immunity; cov infection; monoclonal-antibodies; mouse model; mice; eosinophils; gold nanoparticles; immunopathology; syndrome sars coronavirus
XZN28PSS	journalArticle	2019	Shehata, Mahmoud M.; Mostafa, Ahmed; Teubner, Lisa; Mahmoud, Sara H.; Kandeil, Ahmed; Elshesheny, Rabeh; Boubak, Thamer A.; Frantz, Renate; La Pietra, Luigi; Pleschka, Stephan; Osman, Ahmed; Kayali, Ghazi; Chakraborty, Trinad; Ali, Mohamed A.; Abu Mraheil, Mobarak	Bacterial Outer Membrane Vesicles (OMVs)-Based Dual Vaccine for Influenza A H1N1 Virus and MERS-CoV	Vaccines			10.3390/vaccines7020046		Vaccination is the most functional medical intervention to prophylactically control severe diseases caused by human-to-human or animal-to-human transmissible viral pathogens. Annually, seasonal influenza epidemics attack human populations leading to 290-650 thousand deaths/year worldwide. Recently, a novel Middle East Respiratory Syndrome Coronavirus emerged. Together, those two viruses present a…	19-Jun	2022/9/19 6:52	2022/9/19 6:52		46		2	7		Vaccines								English							Place: Basel Publisher: Mdpi WOS:000474937000013				immunogenicity; influenza vaccine; challenge; receptor-binding domain; MERS-CoV; coronavirus; immunity; H1N1pdm; escherichia-coli; OMVs; origin; protect
7DGQWLHU	journalArticle	2019	Zhao, Ye; Cheng, Jinlong; Yan, Shihong; Jia, Wenfeng; Zhang, Keran; Zhang, Guozhong	S gene and 5a accessory gene are responsible for the attenuation of virulent infectious bronchitis coronavirus	Virology		0042-6822	10.1016/j.virol.2019.04.014		To explore the critical genes associated with infectious bronchitis virus (IBV) virulence, we compared the genome sequences of virulent YN strain and its attenuated strain aYN. Accumulation of mutations in the S gene and the accessory gene 5a were observed, suggesting a potential role in the loss of viral pathogenicity. Two recombinant IBVs (rIBVs) with replacement of the S gene or 5a with corres…	19-Jul	2022/9/19 6:52	2022/9/19 6:52		12月20日			533		Virology								English							Place: San Diego Publisher: Academic Press Inc Elsevier Science WOS:000474941300002				vaccine; identification; cultures; rna; amino-acids; serotype; reverse genetics; 5a gene; beaudette; deletion; ibv; Infections bronchitis virus; S gene; Virulence; virus-strain
7XTUUDA8	journalArticle	2019	Widagdo, W.; Okba, Nisreen M. A.; Li, Wentao; de Jong, Alwin; de Swart, Rik L.; Begeman, Lineke; van den Brand, Judith M. A.; Bosch, Berend-Jan; Haagmans, Bart L.	Species-Specific Colocalization of Middle East Respiratory Syndrome Coronavirus Attachment and Entry Receptors	Journal of Virology		0022-538X	10.1128/JVI.00107-19		Middle East respiratory syndrome coronavirus (MERS-CoV) uses the S1(B) domain of its spike protein to bind to dipeptidyl peptidase 4 (DPP4), its functional receptor, and its S1(A) domain to bind to sialic acids. The tissue localization of DPP4 in humans, bats, camelids, pigs, and rabbits generally correlates with MERS-CoV tropism, highlighting the role of DPP4 in virus pathogenesis and transmissi…	19-Aug	2022/9/19 6:52	2022/9/19 6:52		e00107-19		16	93		J. Virol.								English							Place: Washington Publisher: Amer Soc Microbiology WOS:000480711400001				Middle East respiratory syndrome coronavirus; replication; spike protein; aminopeptidase-n; cell entry; dipeptidyl peptidase 4; humans; dromedary camels; bat coronavirus; camels; common pipistrelle bats; mers-cov infection; region; S1(A) domain; usage
NTLN7YCN	journalArticle	2019	Gutierrez-Gonzalez, Luis H.; Santos-Mendoza, Teresa	Viral targeting of PDZ polarity proteins in the immune system as a potential evasion mechanism	Faseb Journal		0892-6638	10.1096/fj.201900518R		PDZ proteins are highly conserved through evolution; the principal function of this large family of proteins is to assemble protein complexes that are involved in many cellular processes, such as cell-cell junctions, cell polarity, recycling, or trafficking. Many PDZ proteins that have been identified as targets of viral pathogens by promoting viral replication and spread are also involved in epi…	19-Oct	2022/9/19 6:52	2022/9/19 6:52		10607-10617		10	33		Faseb J.								English							Place: Hoboken Publisher: Wiley WOS:000489166300004				immune evasion; binding motif; borne encephalitis-virus; helicobacter-pylori caga; human homolog; infected-cells; influenza-a virus; PDZ-binding motifs; scribble; syndrome-associated coronavirus; t-cell polarity; vaccinia virus; viral hijacking
UNQ2KCZK	journalArticle	2019	Naskalska, Antonina; Dabrowska, Agnieszka; Szczepanski, Artur; Milewska, Aleksandra; Jasik, Krzysztof Piotr; Pyrc, Krzysztof	Membrane Protein of Human Coronavirus NL63 Is Responsible for Interaction with the Adhesion Receptor	Journal of Virology		0022-538X	10.1128/JVI.00355-19		Human coronavirus NL63 (HCoV-NL63) is a common respiratory virus that causes moderately severe infections. We have previously shown that the virus uses heparan sulfate proteoglycans (HSPGs) as the initial attachment factors, facilitating viral entry into the cell. In the present study, we show that the membrane protein (M) of HCoV-NL63 mediates this attachment. Using viruslike particles lacking t…	19-Oct	2022/9/19 6:52	2022/9/19 6:52		e00355-19		19	93		J. Virol.								English							Place: Washington Publisher: Amer Soc Microbiology WOS:000485789300005				aminopeptidase-n; crystal-structure; murine coronavirus; amino-acids; spike protein; acetylated sialic-acid; attachment; binding domain; HCoV-NL63; hemagglutinin-esterase protein; heparan sulfate proteoglycans; heparan-sulfate proteoglycans; membrane protein; transmissible gastroenteritis coronavirus; viruslike particles
7S8IQFXP	journalArticle	2019	Leist, Sarah R.; Jensen, Kara L.; Baric, Ralph S.; Sheahan, Timothy P.	Increasing the translation of mouse models of MERS coronavirus pathogenesis through kinetic hematological analysis	Plos One		1932-6203	10.1371/journal.pone.0220126		Newly emerging viral pathogens pose a constant and unpredictable threat to human and animal health. Coronaviruses (CoVs) have a penchant for sudden emergence, as evidenced by severe acute respiratory syndrome coronavirus (SARS-CoV), Middle East respiratory syndrome CoV (MERS-CoV) and most recently, swine acute diarrhea syndrome coronavirus (SADS-CoV). Small animal models of emerging viral pathoge…	2019/7/24	2022/9/19 6:52	2022/9/19 6:52		e0220126		7	14		PLoS One								English							Place: San Francisco Publisher: Public Library Science WOS:000482335700056				respiratory syndrome coronavirus; disease; cov
V62TVY7Y	journalArticle	2019	Hu, Dan; Zhu, Zhongyu; Li, Shun; Deng, Yongqiang; Wu, Yanling; Zhang, Nana; Puri, Vinita; Wang, Chunyu; Zou, Peng; Lei, Cheng; Tian, Xiaolong; Wang, Yulu; Zhao, Qi; Li, Wei; Prabakaran, Ponraj; Feng, Yang; Cardosa, Jane; Qin, Chengfeng; Zhou, Xiaohui; Dimitrov, Dimiter S.; Ying, Tianlei	A broadly neutralizing germline-like human monoclonal antibody against dengue virus envelope domain III	Plos Pathogens		1553-7366	10.1371/journal.ppat.1007836		Dengue is the most widespread vector-borne viral disease caused by dengue virus (DENV) for which there are no safe, effective drugs approved for clinical use. Here, by using sequential antigen panning of a yeast antibody library derived from healthy donors against the DENV envelop protein domain III (DIII) combined with depletion by an entry defective DIII mutant, we identified a cross-reactive h…	19-Jun	2022/9/19 6:52	2022/9/19 6:52		e1007836		6	15		PLoS Pathog.								English							Place: San Francisco Publisher: Public Library Science WOS:000479154700034				fusion protein; infection; coronavirus; epitope; glycoprotein; binding-energy; hiv-1; potent neutralization; resistant; serotypes
2JDNTQHR	journalArticle	2019	Ul Qamar, Muhammad Tahir; Saleem, Saman; Ashfaq, Usman Ali; Bari, Amna; Anwar, Farooq; Alqahtani, Safar	Epitope-based peptide vaccine design and target site depiction against Middle East Respiratory Syndrome Coronavirus: an immune-informatics study	Journal of Translational Medicine			10.1186/s12967-019-2116-8		Background Middle East Respiratory Syndrome Coronavirus (MERS-COV) is the main cause of lung and kidney infections in developing countries such as Saudi Arabia and South Korea. This infectious single-stranded, positive (+) sense RNA virus enters the host by binding to dipeptidyl-peptide receptors. Since no vaccine is yet available for MERS-COV, rapid case identification, isolation, and infection …	2019/11/8	2022/9/19 6:52	2022/9/19 6:52		362		1	17		J. Transl. Med.								English							Place: London Publisher: Bmc WOS:000496128300002				mers-cov; sars; protein; prediction; Computational approaches; exposure; resource; server; Spike protein; T-and B-cell epitopes; Vaccine design
3BGI5ZIX	journalArticle	2019	Piewbang, Chutchai; Rungsipipat, Anudep; Poovorawan, Yong; Techangamsuwan, Somporn	Cross-sectional investigation and risk factor analysis of community-acquired and hospital-associated canine viral infectious respiratory disease complex	Heliyon			10.1016/j.heliyon.2019.e02726		Canine infectious respiratory disease complex (CIRDC) is associated with multiple factors. The possible transmission source can be via community-acquired infection (CAI) or hospital-associated infection (HAI), but the variable factors within these two routes are not well described. This study aimed to (i) investigate a cross-sectional incidence of canine respiratory viruses, including influenza (…	19-Nov	2022/9/19 6:52	2022/9/19 6:52		e02726		11	5		Heliyon								English							Place: Oxford Publisher: Elsevier Sci Ltd WOS:000500530100026				Clinical research; coronavirus; surveillance; etiology; outbreak; influenza-virus; bacterial; cirdc; Community-acquired; dogs; Dogs; emerging pathogens; Hospital association; Infectious disease; Respiratory system; Respiratory virus; symptoms; Thailand; Veterinary medicine; Zoology
PXR9E4BI	journalArticle	2019	Westerbeck, Jason W.; Machamer, Carolyn E.	The Infectious Bronchitis Coronavirus Envelope Protein Alters Golgi pH To Protect the Spike Protein and Promote the Release of Infectious Virus	Journal of Virology		0022-538X	10.1128/JVI.00015-19		Coronaviruses (CoVs) assemble by budding into the lumen of the early Golgi complex prior to exocytosis. The small CoV envelope (E) protein plays roles in assembly, virion release, and pathogenesis. CoV E has a single hydrophobic domain (HD), is targeted to Golgi membranes, and has cation channel activity in vitro. The E protein from avian infectious bronchitis virus (IBV) has dramatic effects on …	19-Jun	2022/9/19 6:52	2022/9/19 6:52		e00015-19		11	93		J. Virol.								English							Place: Washington Publisher: Amer Soc Microbiology WOS:000467925600001				coronavirus; transport; selection; mechanism; glycoprotein; influenza-virus; acidification; domain; E protein; forms; Golgi; hemagglutinin; ion-channel; oligomers; pH; viroporin
PJQDAX9E	journalArticle	2019	Di Francesco, Cristina E.; Smoglica, Camilla; Paoletti, Barbara; Angelucci, Simone; Innocenti, Marco; Antonucci, Antonio; Di Domenico, Giovanna; Marsilio, Fulvio	Detection of selected pathogens in Apennine wolf (Canis lupus italicus) by a non-invasive GPS-based telemetry sampling of two packs from Majella National Park, Italy	European Journal of Wildlife Research		1612-4642	10.1007/s10344-019-1326-y		In this study, a multi-pathogens survey was conducted to verify the sanitary status of two Italian wolf packs of Majella National Park. Twenty fecal samples (10/pack) were collected using a sampling protocol, based on the combining data from radio-collared wolves with geographic information system (GIS) analysis, allowing to mark off the home range of packs and to recover group-specific and high-…	19-Dec	2022/9/19 6:52	2022/9/19 6:52		84		6	65		Eur. J. Wildl. Res.								English							Place: New York Publisher: Springer WOS:000492591600001				dogs; adenovirus; angiostrongylus-vasorum; Canis lupus italicus; distemper; Fecal samples; foxes vulpes-vulpes; Global positioning system; infections; parasites; Parasites; parvovirus; Viruses; wild carnivores; wolves
U92JRE8Z	journalArticle	2019	Banerjee, Arinjay; Bald, Kaushal; Mossman, Karen	Molecular Pathogenesis of Middle East Respiratory Syndrome (MERS) Coronavirus	Current Clinical Microbiology Reports		2196-5471	10.1007/s40588-019-00122-7		Purpose of Review Middle East respiratory syndrome coronavirus (MERS-CoV) emerged in 2012 and is listed in the World Health Organization's blueprint of priority diseases that need immediate research. Camels are reservoirs of this virus, and the virus spills over into humans through direct contact with camels. Human-to-human transmission and travel-associated cases have been identified as well. Li…	19-Sep	2022/9/19 6:52	2022/9/19 6:52		139-147		3	6		Curr. Clin. Microbiol.								English							Place: New York Publisher: Springer WOS:000482218900007				Coronavirus; replication; mers; sars; functional receptor; recombination; rig-i; cov; 4a; bats; Pathogenesis; phosphorylation; rna-binding protein; Therapeutics
FRSA9YAQ	journalArticle	2019	Jeon, Jae-Hyun; Han, Minje; Chang, Ho-Eun; Park, Sung-Soo; Lee, Jae-Woong; Ahn, Young-Joon; Hong, Duck-Jin	Incidence and seasonality of respiratory viruses causing acute respiratory infections in the Northern United Arab Emirates	Journal of Medical Virology		0146-6615	10.1002/jmv.25464		Background The data on the seasonality of respiratory viruses helps to ensure the optimal vaccination period and to monitor the possible outbreaks of variant type. Objectives This study was designed to describe the molecular epidemiology and seasonality of acute respiratory infection (ARI)-related respiratory viruses in the United Arab Emirates (UAE). Methods Both upper and lower respiratory spec…	19-Aug	2022/9/19 6:52	2022/9/19 6:52		1378-1384		8	91		J. Med. Virol.								English							Place: Hoboken Publisher: Wiley WOS:000473215200003				epidemiology; hospitalization; tract infections; children; etiology; molecular epidemiology; burden; diagnosis; human influenza; infants; influenza-a; respiratory tract infections; seasons; United Arab Emirates (UAE); viral-infections
FT42YT6U	journalArticle	2019	Hassan, Mohamed S. H.; Ojkic, Davor; Coffin, Carla S.; Cork, Susan C.; van der Meer, Frank; Abdul-Careem, Mohamed Faizal	Delmarva (DMV/1639) Infectious Bronchitis Virus (IBV) Variants Isolated in Eastern Canada Show Evidence of Recombination	Viruses-Basel			10.3390/v11111054		Infectious bronchitis virus (IBV) infection in chickens can lead to an economically important disease, namely, infectious bronchitis (IB). New IBV variants are continuously emerging, which complicates vaccination-based IB control. In this study, five IBVs were isolated from clinical samples submitted to a diagnostic laboratory in Ontario, Canada, and subjected to detailed molecular characterizati…	19-Nov	2022/9/19 6:52	2022/9/19 6:52		1054		11	11		Viruses-Basel								English							Place: Basel Publisher: Mdpi WOS:000502292300082				Canada; coronavirus; vaccines; chickens; molecular characterization; strains; recombination; subpopulations; chicken; qx-like; complete genome sequence; genomic sequences; Infectious bronchitis virus (IBV); mutations; performance; phylogenetic analysis
MMSVH8XP	journalArticle	2019	Hashem, Anwar M.; Al-Subhi, Tagreed L.; Badroon, Nassrin A.; Hassan, Ahmed M.; Bajrai, Leena Hussein M.; Banassir, Talib M.; Alquthami, Khalid M.; Azhar, Esam I.	MERS-CoV, influenza and other respiratory viruses among symptomatic pilgrims during 2014 Hajj season	Journal of Medical Virology		0146-6615	10.1002/jmv.25424		More than two million Muslims visit Makkah, Saudi Arabia, annually to perform the religious rituals of Hajj where the risk of spreading respiratory infections is very common. The aim here was to screen symptomatic pilgrims for Middle East respiratory syndrome coronavirus (MERS-CoV) and other viral etiologies. Thus, 132 nasopharyngeal samples were collected from pilgrims presenting with acute resp…	19-Jun	2022/9/19 6:52	2022/9/19 6:52		911-917		6	91		J. Med. Virol.								English							Place: Hoboken Publisher: Wiley WOS:000465087100002				prevalence; influenza; pneumonia; syndrome coronavirus; viruses; middle-east; nasal carriage; surveillance; viral-infections; circulation; Hajj; Middle East respiratory syndrome-coronavirus; respiratory infections; returning hajj; Saudi Arabia; time
JPM9R8J6	journalArticle	2019	Pascual-Iglesias, Alejandro; Sanchez, Carlos M.; Penzes, Zoltan; Sola, Isabel; Enjuanes, Luis; Zuniga, Sonia	Recombinant Chimeric Transmissible Gastroenteritis Virus (TGEV)-Porcine Epidemic Diarrhea Virus (PEDV) Virus Provides Protection against Virulent PEDV	Viruses-Basel			10.3390/v11080682		Porcine epidemic diarrhea virus (PEDV) is an enteric coronavirus causing high morbidity and mortality in porcine herds worldwide. Although both inactivated and live attenuated vaccines have been extensively used, the emergence of highly virulent strains and the recurrent outbreaks even in vaccinated farms highlight the need of effective vaccines. Engineering of genetically defined live attenuated…	19-Aug	2022/9/19 6:52	2022/9/19 6:52		682		8	11		Viruses-Basel								English							Place: Basel Publisher: Mdpi WOS:000482993900062				vaccine; immunogenicity; infection; pedv; strain; united-states; protection; efficacy; attenuated virus; coronavirus spike protein; enteric virus; modified live-vaccine; porcine; s1 domain; swine enteric coronavirus
FZIR2Q8U	journalArticle	2019	Manuel, Oriol; Estabrook, Michele	RNA respiratory viral infections in solid organ transplant recipients: Guidelines from the American Society of Transplantation Infectious Diseases Community of Practice	Clinical Transplantation		0902-0063	10.1111/ctr.13511		These updated guidelines from the Infectious Diseases Community of Practice of the American Society of Transplantation review the diagnosis, prevention, and management of RNA respiratory viral infections in the pre- and post-transplant period. Viruses reviewed include influenza, respiratory syncytial virus (RSV), parainfluenza, rhinovirus, human metapneumovirus (hMPV), and coronavirus. Diagnosis …	19-Sep	2022/9/19 6:52	2022/9/19 6:52		e13511		9	33		Clin. Transplant.								English							Place: Hoboken Publisher: Wiley WOS:000489762300031				influenza; adult recipients; antibiotic; antibiotic prophylaxis; antiviral; bronchiolitis obliterans; double-blind; guidelines; human metapneumovirus; infection and infectious agents; influenza-a h1n1; lung; oral oseltamivir; palivizumab prophylaxis; syncytial virus-infection; viral; young-children
5V2LTATD	journalArticle	2019	Migault, C.; Kanagaratnam, L.; Hentzien, M.; Giltat, A.; Nguyen, Y.; Brunet, A.; Thibault, M.; Legall, A.; Drame, M.; Bani-Sadr, F.	Effectiveness of an education health programme about Middle East respiratory syndrome coronavirus tested during travel consultations	Public Health		0033-3506	10.1016/j.puhe.2019.05.017		Objective: We aimed to evaluate the level of knowledge of Middle East respiratory syndrome coronavirus (MERS-CoV) among Hajj pilgrims before and after an education health programme during international vaccine consultations in France. Study design: A cross-sectional study was performed in the consultation for travel medicine and international vaccination in Reims University Hospital between July …	19-Aug	2022/9/19 6:52	2022/9/19 6:52		29-32			173		Public Health								English							Place: London Publisher: W B Saunders Co Ltd WOS:000477708100007				epidemiology; knowledge; prevention; MERS-CoV; Education health programme; International travel; Middle east respiratory syndrome coronavirus; Pilgrims; saudi
ZBAUNJDU	journalArticle	2019	Singh, Gagandeep; Singh, Pankaj; Pillatzki, Angela; Nelson, Eric; Webb, Brett; Dillberger-Lawson, Steven; Ramamoorthy, Sheela	A Minimally Replicative Vaccine Protects Vaccinated Piglets Against Challenge With the Porcine Epidemic Diarrhea Virus	Frontiers in Veterinary Science			10.3389/fvets.2019.00347		Porcine epidemic diarrhea virus (PEDV), is an economically important enteric coronavirus, with over a 90% mortality rate in neonatal piglets. The virus emerged in the US in 2013, resulting in severe production losses. Effective vaccine development against PEDV is a challenge. Inactivated vaccines are of questionable efficacy. Attenuated vaccines, while more effective, require a relatively long le…	2019/10/22	2022/9/19 6:52	2022/9/19 6:52		347			6		Front. Vet. Sci.								English							Place: Lausanne Publisher: Frontiers Media Sa WOS:000494469000001				antibody; vaccine; spike; pedv; united-states; strains; responses; efficacy; porcine epidemic diarrhea virus; variant; virulent
GWN3ZB8C	journalArticle	2019	Zhao, Ye; Cheng, Jinlong; Xu, Gang; Thiel, Volker; Zhang, Guozhong	Successful establishment of a reverse genetic system for QX-type infectious bronchitis virus and technical improvement of the rescue procedure	Virus Research		0168-1702	10.1016/j.virusres.2019.197726		In this study, a pathogenic avian infectious bronchitis virus (IBV) QX-type strain YN was successfully rescued by vaccinia virus based reverse genetic technology. Ten fragments contiguously spanning the complete IBV genome were amplified and cloned into the vaccinia virus genome by homologous recombination. The full-length genomic cDNA was transcribed in vitro, and its transcript was transfected …	2019/10/15	2022/9/19 6:52	2022/9/19 6:52		197726			272		Virus Res.								English							Place: Amsterdam Publisher: Elsevier WOS:000487572900004				Coronavirus; coronavirus; generation; strain; pathogenicity; rna; selection; in-vitro; vaccinia virus; genome; ibv; virulent; QX-type; Reverse genetic system; Vaccinia virus
WVGCVWNE	journalArticle	2019	Chen, I.-Cheng Mark; Loh, Jin Phang; Chuah, Cheryl X. P.; Gao, Qiu Han Christine; Sun, Yinxiaohe; Ng, Sock Hoon; Koh, Wee-Hong Victor; Goh, Ee Hui; Zhao, Xiahong; Tambyah, Paul Anantharajah; Cook, Alex R.; Chng, Jeremiah; Pang, Junxiong; Tan, Boon-Huan; Lee, Vernon J.	Evidence for Cross-Protection Against Subsequent Febrile Respiratory Illness Episodes From Prior Infections by Different Viruses Among Singapore Military Recruits 2009-2014	Journal of Infectious Diseases		0022-1899	10.1093/infdis/jiz046		Background. Few studies have evaluated the relative cross-protection conferred by infection with different groups of viruses through studies of sequential infections in humans. We investigated the presence of short-lived relative cross-protection conferred by specific prior viral infections against subsequent febrile respiratory illness (FRI). Methods. Men enlisted in basic military training betw…	2019/6/15	2022/9/19 6:52	2022/9/19 6:52		1913-1923		12	219		J. Infect. Dis.								English							Place: Cary Publisher: Oxford Univ Press Inc WOS:000482350100008				serology; vaccine; influenza; surveillance; Antibodies; cell-mediated immunity; cohort studies; cross-protection; interference
8G3CNIFB	journalArticle	2019	Al-Tawfiq, Jaffar A.; Memish, Ziad A.	The Hajj 2019 Vaccine Requirements and Possible New Challenges	Journal of Epidemiology and Global Health		2210-6006	10.2991/jegh.k.190705.001		Each year millions of pilgrims perform the annual Hajj from more than 180 countries around the world. This is one of the largest mass gathering events and may result in the occurrence and spread of infectious diseases. As such, there are mandatory vaccinations for the pilgrims such as meningococcal vaccines. The 2019 annual Hajj will take place during August 8-13, 2019. Thus, we review the recomm…	19-Sep	2022/9/19 6:52	2022/9/19 6:52		147-152		3	9		J. Epidemiol. Glob. Health								English							Place: Paris Publisher: Atlantis Press WOS:000484417500001				mers-cov; syndrome coronavirus; middle-east; Hajj; Saudi Arabia; electrophoretic type-37; influenza-like illness; mass gathering; mass gatherings; measles outbreak; pilgrimage; serogroup w135; vaccine requirements; viral respiratory-infections; w135 meningococcal disease
8T6AZ49S	journalArticle	2019	Kumar, Prashant; Morawska, Lidia	Could fighting airborne transmission be the next line of defence against COVID-19 spread?	City and Environment Interactions		2590-2520	10.1016/j.cacint.2020.100033		The World Health Organization declared the infectious spread of SARS-CoV-2 (severe acute respiratory syndrome coronavirus 2) an epidemic during its initial outbreak in Wuhan (China) and has since declared it a pandemic and, more recently, an endemic infection that may remain in our communities. A vaccine for COVID-19 is expected to take several months, meaning that the spread may continue in futu…	19-Dec	2022/9/19 6:52	2022/9/19 6:52		100033			4		City Environ. Interact.								English							Place: Amsterdam Publisher: Elsevier WOS:000658303900008				Air transmission; COVID-19 pandemic; Facemasks; Hospitation admissions; Indoor ventilation; SARC-CoV-2 spread
IGFU2P8U	journalArticle	2019	Hashem, Anwar M.; Algaissi, Abdullah; Agrawal, Anurodh Shankar; Al-amri, Sawsan S.; Alhabbab, Rowa Y.; Sohrab, Sayed S.; Almasoud, Abdulrahman S.; Alharbi, Naif Khalaf; Peng, Bi-Hung; Russell, Marsha; Li, Xuguang; Tseng, Chien-Te K.	A Highly Immunogenic, Protective, and Safe Adenovirus-Based Vaccine Expressing Middle East Respiratory Syndrome Coronavirus S1-CD40L Fusion Protein in a Transgenic Human Dipeptidyl Peptidase 4 Mouse Model	Journal of Infectious Diseases		0022-1899	10.1093/infdis/jiz137		Background. Infection control measures have played a major role in limiting human/camel-to-human transmission of Middle East respiratory syndrome coronavirus (MERS-CoV); however, development of effective and safe human or camel vaccines is warranted. Methods. We extended and optimized our previous recombinant adenovirus 5 (rAd5)-based vaccine platform characterized by in vivo amplified and CD40-m…	2019/11/15	2022/9/19 6:52	2022/9/19 6:52		1558-1567		10	220		J. Infect. Dis.								English							Place: Cary Publisher: Oxford Univ Press Inc WOS:000491241900004				vaccine; virus; mers-cov; receptor-binding domain; MERS-CoV; sars-cov; neutralizing antibodies; dromedary camels; mice; immunopathology; adenovirus; cd40l; cellular immune-responses; cov spike protein; feline infectious peritonitis
QP5IWGIT	journalArticle	2019	Xu, Ke; Huo, Xiang; Zu, Rongqiang; Wang, Shenjiao; Qin, Yuanfang; Dai, Qigang; Qi, Xian; Yu, Huiyan; Chen, Lilin; Hong, Lei; Xu, Yangting; Yi, Qianhua; Wang, Weixiang; Wang, Xuan; Dai, Wenjun; Zha, Jie; Han, Weining; Bao, Changjun	Etiological characteristics of influenza-like illness in Jiangsu province from 2012 to 2016	Journal of Biomedical Research		1674-8301	10.7555/JBR.33.20180128		Influenza-like illness (ILI) is an acute respiratory infection caused by various pathogens. However, the epidemiologic characteristics of ILI pathogens in Jiangsu province are unclear. To better understand the ILI etiology, the characteristics of the pathogens from nasopharyngeal swab samples of patients with ILI collected from 2012 to 2016 in 6 hospitals in Jiangsu province were studied. The pat…	19-Nov	2022/9/19 6:52	2022/9/19 6:52		398-407		6	33		J. Biomed. Res.								English							Place: Nanjing Publisher: Nanjing Medical Univ WOS:000510145800005				epidemiology; pneumonia; infection; coronavirus; influenza-like illness; surveillance; disease; children; infants; co-infection; distribution; pathogens; respiratory syncytial virus
[truncated: 37 more columns]
