# Supplementary material for: A Bibliometric Visualization Analysis on Vaccine Development of Coronavirus Disease 2019 (COVID-19)
Source: Vaccines (Basel). 2023 Jan 29;11(2):295. doi: 10.3390/vaccines11020295 (PMC9959778; doi:10.3390/vaccines11020295)
Supplement: Supplementary file 1 [file vaccines-11-00295-s001.zip › Appendix S3 data from WOS core collection database downloadpublished in 2020_2400.csv]

Key	Item Type	Publication Year	Author	Title	Publication Title	ISBN	ISSN	DOI	Url	Abstract Note	Date	Date Added	Date Modified	Access Date	Pages	Num Pages	Issue	Volume	Number Of Volumes	Journal Abbreviation	Short Title	Series	Series Number	Series Text	Series Title	Publisher	Place	Language	Rights	Type	Archive	Archive Location	Library Catalog	Call Number	Extra	Notes	File Attachments	Link Attachments	Manual Tags	Automatic Tags	Editor	Series Editor	Translator	Contributor	Attorney Agent	Book Author	Cast Member	Commenter	Composer
C3QPMARP	journalArticle	2021	Demers-Mathieu, Veronique; Dung, M.; Mathijssen, Gabrielle B.; Sela, David A.; Seppo, Antti; Jarvinen, Kirsi M.; Medo, Elena	Difference in levels of SARS-CoV-2 S1 and S2 subunits- and nucleocapsid protein-reactive SIgM/IgM, IgG and SIgA/IgA antibodies in human milk	Journal of Perinatology		0743-8346	10.1038/s41372-020-00805-w		Objective This study evaluated the presence and the levels of antibodies reactive to SARS-CoV-2 S1 and S2 subunits (S1 + S2), and nucleocapsid protein. Study design The levels of SARS-CoV-2 S1 + S2- and nucleocapsid-reactive SIgM/IgM, IgG and SIgA/IgA were measured in human milk samples from 41 women during the COVID-19 pandemic (2020-HM) and from 16 women 2 years prior to the outbreak (2018-HM).…	21-Apr	2022/9/20 11:25	2022/9/20 11:25		850-859		4	41		J. Perinatol.								English							Place: London Publisher: Springernature WOS:000565614700003				pregnancy; vaccine; protection; sars; immunization; diphtheria; monomeric iga; polyreactive antibodies; tetanus
CL42PM72	journalArticle	2020	Radon, Katja; Saathoff, Elmar; Pritsch, Michael; Noller, Jessica Michelle Guggenbuehl; Kroidl, Inge; Olbrich, Laura; Thiel, Verena; Diefenbach, Max; Riess, Friedrich; Forster, Felix; Theis, Fabian; Wieser, Andreas; Hoelscher, Michael	Protocol of a population-based prospective COVID-19 cohort study Munich, Germany (KoCo19)	Bmc Public Health			10.1186/s12889-020-09164-9		BackgroundDue to the SARS-CoV-2 pandemic, public health interventions have been introduced globally in order to prevent the spread of the virus and avoid the overload of health care systems, especially for the most severely affected patients. Scientific studies to date have focused primarily on describing the clinical course of patients, identifying treatment options and developing vaccines. In G…	2020/6/30	2022/9/20 11:25	2022/9/20 11:25				1	20		BMC Public Health								English							Place: London Publisher: Bmc WOS:000546835600001				covid-19; epidemiology; Pandemics; Coronavirus infections; Stress; psychological; economic; Enzyme-linked Immunosorbent assay; Geographic information systems; Models; Panel study; Socio-economic factors; Spatial analysis
RXJII9VW	journalArticle	2020	Kasetsirikul, Surasak; Umer, Muhammad; Soda, Narshone; Sreejith, Kamalalayam Rajan; Shiddiky, Muhammad J. A.; Nguyen, Nam-Trung	Detection of the SARS-CoV-2 humanized antibody with paper-based ELISA	Analyst		0003-2654	10.1039/d0an01609h		This work reports the development of a rapid, simple and inexpensive colorimetric paper-based assay for the detection of the severe acute respiratory symptom coronavirus 2 (SARS-CoV-2) humanized antibody. The paper device was prepared with lamination for easy sample handling and coated with the recombinant SARS-CoV-2 nucleocapsid antigen. This assay employed a colorimetric reaction, which is foll…	2020/12/7	2022/9/20 11:25	2022/9/20 11:25		7680-7686		23	145		Analyst								English							Place: Cambridge Publisher: Royal Soc Chemistry WOS:000592315100021
UA2FH75L	journalArticle	2020	Haq, Faiz Ul; Roman, Muhammad; Ahnnad, Kashif; Rahman, Saeed Ur; Shah, Syed Murtaza Ali; Suleman, Naveed; Ullah, Sami; Ahnnad, Iftekhar; Ullah, Wajahat	Artemisia annua: Trials are needed for COVID-19	Phytotherapy Research		0951-418X	10.1002/ptr.6733		In December 2019, a number of pneumonia cases associated with 2019 novel coronavirus occurred in Wuhan, China. Later taxonomist name the virus SARS-CoV-2 and disease called COVID-19. No approved vaccine or treatment are available for this virus. Current technical guide is related to address therapeutic option for SARS-CoV-2. COVID-19 is great challenge for scientist across the globe. Bioactive co…	20-Oct	2022/9/20 11:25	2022/9/20 11:25		2423-2424		10	34		Phytother. Res.								English							Place: Hoboken Publisher: Wiley WOS:000535689800001				covid-19; SARS-CoV-2; coronavirus; antiviral agents; antioxidants; antiviral activities; Artemisia annua; bioactive compound
3SH7QN4N	journalArticle	2020	Weisblum, Yiska; Schmidt, Fabian; Zhang, Fengwen; DaSilva, Justin; Poston, Daniel; Lorenzi, Julio C. C.; Muecksch, Frauke; Rutkowska, Magdalena; Hoffmann, Hans-Heinrich; Michailidis, Eleftherios; Gaebler, Christian; Agudelo, Marianna; Cho, Alice; Wang, Zijun; Gazumyan, Anna; Cipolla, Melissa; Luchsinger, Larry; Hillyer, Christopher D.; Caskey, Marina; Robbiani, Davide F.; Rice, Charles M.; Nussen…	Escape from neutralizing antibodies by SARS-CoV-2 spike protein variants	Elife		2050-084X	10.7554/eLife.61312		Neutralizing antibodies elicited by prior infection or vaccination are likely to be key for future protection of individuals and populations against SARS-CoV-2. Moreover, passively administered antibodies are among the most promising therapeutic and prophylactic anti-SARSCoV-2 agents. However, the degree to which SARS-CoV-2 will adapt to evade neutralizing antibodies is unclear. Using a recombina…	2020/10/28	2022/9/20 11:25	2022/9/20 11:25		e61312			9		eLife								English							Place: Cambridge Publisher: eLIFE SCIENCES PUBL LTD WOS:000599224600001				viruses; error frequencies
DI6VV4KT	journalArticle	2020	Zhao, Yan; Qin, Ling; Zhang, Ping; Li, Kang; Liang, Lianchun; Sun, Jianping; Xu, Bin; Dai, Yanchao; Li, Xuemei; Zhang, Chi; Peng, Yanchun; Feng, Yingmei; Li, Ang; Hu, Zhongjie; Xiang, Haiping; Ogg, Graham; Ho, Ling-Pei; McMichael, Andrew; Jin, Ronghua; Knight, Julian C.; Dong, Tao; Zhang, Yonghong	Longitudinal COVID-19 profiling associates IL-1RA and IL-10 with disease severity and RANTES with mild disease	Jci Insight			10.1172/jci.insight.139834		BACKGROUND. Identifying immune correlates of COVID-19 disease severity is an urgent need for clinical management, vaccine evaluation, and drug development. Here, we present a temporal analysis of key immune mediators, cytokines, and chemokines in blood of hospitalized COVID-19 patients from serial sampling and follow-up over 4 weeks. METHODS. A total of 71 patients with laboratory-confirmed COVID…	2020/7/9	2022/9/20 11:25	2022/9/20 11:25		e139834		13	5		JCI Insight								English							Place: Ann Arbor Publisher: Amer Soc Clinical Investigation Inc WOS:000568804600001				protection; replication; immunity; coronaviruses; influenza-virus
JT4K9FFY	journalArticle	2020	Sarantis, Panagiotis; Koustas, Evangelos; Papavassiliou, Athanasios G.; Karamouzis, Michalis V.	Are cystic fibrosis mutation carriers a potentially highly vulnerable group to COVID-19?	Journal of Cellular and Molecular Medicine		1582-1838	10.1111/jcmm.15941		Undoubtedly, the new SARS-CoV-2 virus poses a grave health threat, plaguing the health and socio-economic sectors. COVID-19 disease must be treated quickly and effectively as soon as possible. The main axes in this direction are establishing vaccines, drugs, diagnostic tests, as well as identifying the most vulnerable groups. Probably, there is a correlation between COVID-19 and cystic fibrosis. …	20-Nov	2022/9/20 11:25	2022/9/20 11:25		13542-13545		22	24		J. Cell. Mol. Med.								English							Place: Hoboken Publisher: Wiley WOS:000574530600001				covid-19; SARS-CoV-2; disease; gene; expression; nf-kappa-b; ace-2; ctfr; cystic fibrosis
EFQCJKNV	journalArticle	2020	Van Norman, Gail A.	Update to Drugs, Devices, and the FDA How Recent Legislative Changes Have Impacted Approval of New Therapies	Jacc-Basic to Translational Science		2452-302X	10.1016/j.jacbts.2020.06.010		Two major legislative actions since 2015, the 21st Century Cures Act of 2016 and the U.S. Food and Drug Administration (FDA) Reauthorization Act of 2017, contain significant provisions that potentially streamline drug development times, and by extension, may reduce costs. Evidence suggests, however, that development times have already been significantly affected by previous legislation and FDA pr…	20-Aug	2022/9/20 11:25	2022/9/20 11:25		831-839		8	5		JACC-Basic Transl. Sci.								English							Place: New York Publisher: Elsevier Science Inc WOS:000601149000010				covid-19; pandemic; drug approval; drug legislation; emergency use; expanded access; vaccine approval
A9C32QT4	journalArticle	2020	Marinho, Emanuelle Machado; de Andrade Neto, Joao Batista; Silva, Jacilene; da Silva, Cecilia Rocha; Cavalcanti, Bruno Coelho; Marinho, Emmanuel Silva; Nobre Junior, Helio Vitoriano	Virtual screening based on molecular docking of possible inhibitors of Covid-19 main protease	Microbial Pathogenesis		0882-4010	10.1016/j.micpath.2020.104365		Coronavirus (COVID-19) is an enveloped RNA virus that is diversely found in humans and that has now been declared a global pandemic by the World Health Organization. Thus, there is an urgent need to develop effective therapies and vaccines against this disease. In this context, this study aimed to evaluate in silico the molecular interactions of drugs with therapeutic indications for treatment of…	20-Nov	2022/9/20 11:25	2022/9/20 11:25		104365			148		Microb. Pathog.								English							Place: London Publisher: Academic Press Ltd- Elsevier Science Ltd WOS:000592506700005				covid-19; Molecular docking; Inhibitors
8UETGQWP	journalArticle	2020	Forman, Lisa; Kohler, Jillian Clare	Global health and human rights in the time of COVID-19: Response, restrictions, and legitimacy	Journal of Human Rights		1475-4835	10.1080/14754835.2020.1818556		Policy responses to the COVID-19 pandemic have impacted a range of human rights, with the pandemic being used to justify police violence, authoritarian power grabs, and corruption. Health systems in high- and low-income countries have struggled to provide adequate COVID-19 testing, tracing, and treatment, with non-COVID-19 healthcare-restricted, vulnerable populations at high risk of infection an…	2020/10/19	2022/9/20 11:25	2022/9/20 11:25		547-556		5	19		J. Hum. Rights								English							Place: Abingdon Publisher: Routledge Journals, Taylor & Francis Ltd WOS:000588459000005
DNRSM4X6	journalArticle	2020	Santoro, Michael; Shanklin, Robert	Human rights obligations of drug companies	Journal of Human Rights		1475-4835	10.1080/14754835.2020.1820315		This article addresses the human rights obligations of pharmaceutical companies regarding access to vaccines and other drugs developed to prevent and treat COVID-19, and more broadly regarding access to essential medicines. We examine two United Nations guidelines-the Guiding Principles on Business and Human Rights and the Human Rights Guidelines for Pharmaceutical Companies in relation to Access…	2020/10/19	2022/9/20 11:25	2022/9/20 11:25		557-567		5	19		J. Hum. Rights								English							Place: Abingdon Publisher: Routledge Journals, Taylor & Francis Ltd WOS:000588459000006				business; ethics; access
DEMRVYA4	journalArticle		Yadav, Reena; Choudhury, Chinmayee; Kumar, Yashwant; Bhatia, Alka	Virtual repurposing of ursodeoxycholate and chenodeoxycholate as lead candidates against SARS-Cov2-Envelope protein: A molecular dynamics investigation	Journal of Biomolecular Structure & Dynamics		0739-1102	10.1080/07391102.2020.1868339		Drug repurposing is an apt choice to combat the currently prevailing global threat of COVID-19, caused by SARS-Cov2in absence of any specific medication/vaccine. The present work employs state of art computational methods like homology modelling, molecular docking and molecular dynamics simulations to evaluate the potential of two widely used surfactant drugs namely chenodeoxycholate(CDC) and urs…		2022/9/20 11:25	2022/9/20 11:25							J. Biomol. Struct. Dyn.								English							Place: Philadelphia Publisher: Taylor & Francis Inc WOS:000603830600001				molecular dynamics simulations; molecular docking; drug repurposing; Chenodeoxycholate; SARS-Cov2-E; ursodeoxycholate
3EVBE24N	journalArticle	2020	Fedotov, Ilya; Yi, Zhenhuan; Voronin, Aleksandr A.; Svidzinsky, Anatoly A.; Sower, Kyle; Liu, Xinghua; Vlasova, Ekaterina; Peng, Tao; Liu, Xiangpei; Moiseev, Sergey A.; Belousov, Vsevolod V.; Sokolov, Alexei; Scully, Marlan O.; Zheltikov, Aleksei M.	Light and corona: guided-wave readout for coronavirus spike protein-host-receptor binding	Optics Letters		0146-9592	10.1364/OL.402897		We show that waveguide sensors can enable a quantitative characterization of coronavirus spike glycoprotein-host-receptor binding-the process whereby coronaviruses enter human cells, causing disease. We demonstrate that such sensors can help quantify and eventually understand kinetic and thermodynamic properties of viruses that control their affinity to targeted cells, which is known to significa…	2020/10/1	2022/9/20 11:25	2022/9/20 11:25		5428-5431		19	45		Opt. Lett.								English							Place: Washington Publisher: Optical Soc Amer WOS:000577120500035				generation; nanoparticles; laser-pulses; single viruses
2J57LRHH	journalArticle	2020	Baruah, Vargab; Bose, Sujoy	Immunoinformatics-aided identification of T cell and B cell epitopes in the surface glycoprotein of 2019-nCoV	Journal of Medical Virology		0146-6615	10.1002/jmv.25698		The 2019 novel coronavirus (2019-nCoV) outbreak has caused a large number of deaths with thousands of confirmed cases worldwide, especially in East Asia. This study took an immunoinformatics approach to identify significant cytotoxic T lymphocyte (CTL) and B cell epitopes in the 2019-nCoV surface glycoprotein. Also, interactions between identified CTL epitopes and their corresponding major histoc…	20-May	2022/9/20 11:25	2022/9/20 11:25		495-500		5	92		J. Med. Virol.								English							Place: Hoboken Publisher: Wiley WOS:000517679900001				covid-19; SARS-CoV-2; prediction; coronavirus; protein; evolution; 2019-nCoV; epitope prediction; immunoinformatics
DR2S7Y8Y	journalArticle	2020	Park, Hojeong; Kim, Songhee H.	A Study on Herd Immunity of COVID-19 in South Korea: Using a Stochastic Economic-Epidemiological Model	Environmental & Resource Economics		0924-6460	10.1007/s10640-020-00439-8		Vaccination is an effective measure to control the diffusion of infectious disease such as COVID-19. This paper analyzes the basic reproduction number in South Korea which enables us to identify a necessary level of vaccine stockpile to achieve herd immunity. An susceptible-infected-susceptible model is adopted that allows a stochastic diffusion. The result shows that the basic reproduction numbe…	20-Aug	2022/9/20 11:25	2022/9/20 11:25		665-670		4	76		Environ. Resour. Econ.								English							Place: Dordrecht Publisher: Springer WOS:000548160400001				covid-19; sis; Stochastic disease; Vaccination stockpile
JR6H84EB	journalArticle	2020	Hedde, Per Niklas; Abram, Timothy J.; Jain, Aarti; Nakajima, Rie; de Assis, Rafael Ramiro; Pearce, Trevor; Jasinskas, Algis; Toosky, Melody N.; Khan, Saahir; Felgner, Philip L.; Gratton, Enrico; Zhao, Weian	A modular microarray imaging system for highly specific COVID-19 antibody testing	Lab on a Chip		1473-0197	10.1039/d0lc00547a		To detect the presence of antibodies in blood against SARS-CoV-2 in a highly sensitive and specific manner, here we describe a robust, inexpensive ($200), 3D-printable portable imaging platform (TinyArray imager) that can be deployed immediately in areas with minimal infrastructure to read coronavirus antigen microarrays (CoVAMs) that contain a panel of antigens from SARS-CoV-2, SARS-1, MERS, and…	2020/9/21	2022/9/20 11:25	2022/9/20 11:25		3302-3309		18	20		Lab Chip								English							Place: Cambridge Publisher: Royal Soc Chemistry WOS:000569507600021
FIWNDEFU	journalArticle	2020	Nie, Jianhui; Li, Qianqian; Wu, Jiajing; Zhao, Chenyan; Hao, Huan; Liu, Huan; Zhang, Li; Nie, Lingling; Qin, Haiyang; Wang, Meng; Lu, Qiong; Li, Xiaoyu; Sun, Qiyu; Liu, Junkai; Fan, Changfa; Huang, Weijin; Xu, Miao; Wang, Youchun	Establishment and validation of a pseudovirus neutralization assay for SARS-CoV-2	Emerging Microbes & Infections			10.1080/22221751.2020.1743767		Pseudoviruses are useful virological tools because of their safety and versatility, especially for emerging and re-emerging viruses. Due to its high pathogenicity and infectivity and the lack of effective vaccines and therapeutics, live SARS-CoV-2 has to be handled under biosafety level 3 conditions, which has hindered the development of vaccines and therapeutics. Based on a VSV pseudovirus produ…	2020/1/1	2022/9/20 11:25	2022/9/20 11:25		680-686		1	9		Emerg. Microbes Infect.								English							Place: Abingdon Publisher: Taylor & Francis Ltd WOS:000522100500001				covid-19; SARS-CoV-2; vaccine; antibodies; protein; neutralizing antibody; in-vitro; pseudovirus; imaging mouse model; neutralization assay; system enables evaluation
CD5XGUWA	journalArticle	2020	Kudo, Masatoshi; Kurosaki, Masayuki; Ikeda, Masafumi; Aikata, Hiroshi; Hiraoka, Atsushi; Torimura, Takuji; Sakamoto, Naoya	Treatment of hepatocellular carcinoma during the COVID-19 outbreak: The Working Group report of JAMTT-HCC	Hepatology Research		1386-6346	10.1111/hepr.13541		This contingency guide was formulated on the premise that delivering standard treatment for hepatocellular carcinoma (HCC) has come under strain due to the coronavirus (COVID-19) pandemic. Measures required are likely to vary largely across regions and individual institutions, depending on the level of the strain imposed by the pandemic (e.g., number of inpatients infected with COVID-19 and the a…	20-Sep	2022/9/20 11:25	2022/9/20 11:25		1004-1014		9	50		Hepatol. Res.								English							Place: Hoboken Publisher: Wiley WOS:000550450600001				covid-19; therapy; pneumonia; wuhan; subclassification; arterial infusion chemotherapy; hepatocellular carcinoma; JAMTT-HCC | liver dysfunction | systemic therapy | up-to-seven criteria; lenvatinib; sorafenib
UCSRZZUK	journalArticle	2020	Graham, Jessica B.; Swarts, Jessica L.; Menachery, Vineet D.; Gralinski, Lisa E.; Schafer, Alexandra; Plante, Kenneth S.; Morrison, Clayton R.; Voss, Kathleen M.; Green, Richard; Choonoo, Gabrielle; Jeng, Sophia; Miller, Darla R.; Mooney, Michael A.; McWeeney, Shannon K.; Ferris, Martin T.; de Villena, Fernando Pardo-Manuel; Gale, Michael; Heise, Mark T.; Baric, Ralph S.; Lund, Jennifer M.	Immune Predictors of Mortality After Ribonucleic Acid Virus Infection	Journal of Infectious Diseases		0022-1899	10.1093/infdis/jiz531		Background. Virus infections result in a range of clinical outcomes for the host, from asymptomatic to severe or even lethal disease. Despite global efforts to prevent and treat virus infections to limit morbidity and mortality, the continued emergence and re-emergence of new outbreaks as well as common infections such as influenza persist as a health threat. Challenges to the prevention of sever…	2020/3/15	2022/9/20 11:25	2022/9/20 11:25		882-889		6	221		J. Infect. Dis.								English							Place: Cary Publisher: Oxford Univ Press Inc WOS:000518552500006				innate; regulatory t-cells; architecture; collaborative cross; Collaborative Cross; homeostasis; icos; immune correlates of mortality; memory phenotype; neonatal mice; RNA virus infection
RPQ8D948	journalArticle	2020	Kierat, Wojciech; Augustyn, Weronika; Koper, Piotr; Pawlyta, Miroslawa; Chrusciel, Arkadiusz; Wyrwol, Bernard	The Use of UVC Irradiation to Sterilize Filtering Facepiece Masks Limiting Airborne Cross-Infection	International Journal of Environmental Research and Public Health			10.3390/ijerph17207396		In addition to looking for effective drugs and a vaccine, which are necessary to save and protect human health, it is also important to limit, or at least to slow, the spread of coronavirus. One important element in this action is the use of individual protective devices such as filtering facepiece masks. Currently, masks that use a mechanical filter, such as a HEPA (High Efficiency Particulate A…	20-Oct	2022/9/20 11:25	2022/9/20 11:25		7396		20	17		Int. J. Environ. Res. Public Health								English							Place: Basel Publisher: Mdpi WOS:000585511500001				SARS-CoV-2; efficacy; inactivation; decontamination; bacillus-atrophaeus; HEPA filter sterilization; ultraviolet germicidal irradiation; uvgi
D2HWVWIS	journalArticle	2020	Prasad, Ashish; Muthamilarasan, Mehanathan; Prasad, Manoj	Synergistic antiviral effects against SARS-CoV-2 by plant-based molecules	Plant Cell Reports		0721-7714	10.1007/s00299-020-02560-w		The exponential spread of Severe acute respiratory syndrome coronavirus 2 (SARS-CoV-2) emphasizes the immediate need for effective antiviral drugs and vaccines that could control and prevent the spread of this pandemic. Several new and repurposed drugs are being tested for their effectiveness in the treatment regime, and the development of vaccines is underway. The availability of genome sequence…	20-Sep	2022/9/20 11:25	2022/9/20 11:25		1109-1114		9	39		Plant Cell Reports								English							Place: New York Publisher: Springer WOS:000541305900001				SARS-CoV-2; identification; coronavirus; virus; sars; replication; prevention; spike protein; chinese medicine; Antiviral biomolecules; Plant-based vaccines; Plant-based drugs; Synergistic effect; Traditional medicine
8MXMSKMW	journalArticle	2020	Li, Zhiwei; Ma, Zhiqian; Li, Yang; Gao, Sheng; Xiao, Shuqi	Porcine epidemic diarrhea virus: Molecular mechanisms of attenuation and vaccines	Microbial Pathogenesis		0882-4010	10.1016/j.micpath.2020.104553		Porcine epidemic diarrhea virus (PEDV) causes an emerging and re-emerging coronavirus disease characterized by vomiting, acute diarrhea, dehydration, and up to 100% mortality in neonatal suckling piglets, leading to huge economic losses in the global swine industry. Vaccination remains the most promising and effective way to prevent and control PEDV. However, effective vaccines for PEDV are still…	20-Dec	2022/9/20 11:25	2022/9/20 11:25		104553			149		Microb. Pathog.								English							Place: London Publisher: Academic Press Ltd- Elsevier Science Ltd WOS:000599711400008				Vaccine; nf-kappa-b; respiratory syndrome-coronavirus; sars-coronavirus; messenger-rna vaccines; papain-like protease; transmissible gastroenteritis virus; infectious-bronchitis virus; Genetics; endoplasmic-reticulum stress; murine hepatitis-virus; Porcine epidemic diarrhea virus; prolongs s-phase; Virulence
N4JQB3G5	journalArticle	2020	Lu, Hongzhou	Drug treatment options for the 2019-new coronavirus (2019-nCoV)	Bioscience Trends		1881-7815	10.5582/bst.2020.01020		As of January 22, 2020, a total of 571 cases of the 2019-new coronavirus (2019-nCoV) have been reported in 25 provinces (districts and cities) in China. At present, there is no vaccine or antiviral treatment for human and animal coronavirus, so that identifying the drug treatment options as soon as possible is critical for the response to the 2019-nCoV outbreak. Three general methods, which inclu…	20-Feb	2022/9/20 11:25	2022/9/20 11:25		69-71		1	14		BioSci. Trends								English							Place: Tokyo Publisher: Irca-Bssa WOS:000519548300011				pneumonia; 2019-nCoV; respiratory syndrome coronavirus; Coronaviruses
FMWZD2YL	journalArticle	2020	Wang, Maopeng; Fu, Tingting; Hao, Jiayi; Li, Letian; Tian, Mingyao; Jin, Ningyi; Ren, Linzhu; Li, Chang	A recombinant Lactobacillus plantarum strain expressing the spike protein of SARS-CoV-2	International Journal of Biological Macromolecules		0141-8130	10.1016/j.ijbiomac.2020.05.239		Coronavirus disease 2019 (COVID-19), which is caused by severe acute respiratory syndrome coronavirus 2 (SARS-CoV-2), has become a global pandemic in the past four months and causes respiratory disease in humans of almost all ages. Although several drugs have been announced to be partially effective treatments for this disease, no approved vaccine is available. Here, we described the construction…	2020/10/1	2022/9/20 11:25	2022/9/20 11:25		736-740			160		Int. J. Biol. Macromol.								English							Place: Amsterdam Publisher: Elsevier WOS:000564753300006				coronavirus; mice; food; Severe acute respiratory syndrome coronavirus 2 (SARS-CoV-2); Coronavirus disease 2019 (COVID-19); Lactobacillus plantarum (L. plantarum); oral immunization
YWFALWP2	journalArticle	2020	Yu, Jie-Mei; Zhang, Li-Shu; Fu, Yuan-Hui; Ji, Feng-Min; Xu, Han-Li; Huang, Jia-Qiang; Peng, Xiang-Lei; Zheng, Yan-Peng; Zhang, Ying; He, Jin-Sheng	Analysis of Continuous Mutation and Evolution on Circulating SARS-CoV-2	Evolutionary Bioinformatics		1176-9343	10.1177/1176934320954870		Monitoring the mutation and evolution of the virus is important for tracing its ongoing transmission and facilitating effective vaccine development. A total of 342 complete genomic sequences of SARS-CoV-2 were analyzed in this study. Compared to the reference genome reported in December 2019, 465 mutations were found, among which, 347 occurred in only 1 sequence, while 26 occurred in more than 5 …	20-Sep	2022/9/20 11:25	2022/9/20 11:25		1.18E+15			16		Evol. Bioinform.								English							Place: London Publisher: Sage Publications Ltd WOS:000576366700001				SARS-CoV-2; evolution; clusters; mutation dynamics; snp
Y8GMUHMY	journalArticle	2020	Sahai, Alok Kumar; Rath, Namita; Sood, Vishal; Singh, Manvendra Pratap	ARIMA modelling & forecasting of COVID-19 in top five affected countries	Diabetes & Metabolic Syndrome-Clinical Research & Reviews		1871-4021	10.1016/j.dsx.2020.07.042		Background and aims: In a little over six months, the Corona virus epidemic has affected over ten million and killed over half a million people worldwide as on June 30, 2020. With no vaccine in sight, the spread of the virus is likely to continue unabated. This article aims to analyze the time series data for top five countries affected by the COVID-19 for forecasting the spread of the epidemic. …	20-Oct	2022/9/20 11:25	2022/9/20 11:25		1419-1427		5	14		Diabetes Metab. Syndr.-Clin. Res. Rev.								English							Place: Oxford Publisher: Elsevier Sci Ltd WOS:000582194300126				covid-19; surveillance; regression; pneumonia; Pandemic; infectious-disease outbreaks; arima; time-series; Forecasting; detecting aberrations; SARV-2 Cov; statistical-methods
WKHZTED4	journalArticle	2020	Davidson, Andrew D.; Williamson, Maia Kavanagh; Lewis, Sebastian; Shoemark, Deborah; Carroll, Miles W.; Heesom, Kate J.; Zambon, Maria; Ellis, Joanna; Lewis, Philip A.; Hiscox, Julian A.; Matthews, David A.	Characterisation of the transcriptome and proteome of SARS-CoV-2 reveals a cell passage induced in-frame deletion of the furin-like cleavage site from the spike glycoprotein	Genome Medicine		1756-994X	10.1186/s13073-020-00763-0		Background SARS-CoV-2 is a recently emerged respiratory pathogen that has significantly impacted global human health. We wanted to rapidly characterise the transcriptomic, proteomic and phosphoproteomic landscape of this novel coronavirus to provide a fundamental description of the virus's genomic and proteomic potential. Methods We used direct RNA sequencing to determine the transcriptome of SAR…	2020/7/28	2022/9/20 11:25	2022/9/20 11:25		68		1	12		Genome Med.								English							Place: London Publisher: Bmc WOS:000556651700001				activation; replication; sars-coronavirus; fusion protein; phosphorylation
7BGL9EJ3	journalArticle	2020	van Doremalen, Neeltje; Lambe, Teresa; Spencer, Alexandra; Belij-Rammerstorfer, Sandra; Purushotham, Jyothi N.; Port, Julia R.; Avanzato, Victoria A.; Bushmaker, Trenton; Flaxman, Amy; Ulaszewska, Marta; Feldmann, Friederike; Allen, Elizabeth R.; Sharpe, Hannah; Schulz, Jonathan; Holbrook, Myndi; Okumura, Atsushi; Meade-White, Kimberly; Perez-Perez, Lizzette; Edwards, Nick J.; Wright, Daniel; Bis…	ChAdOx1 nCoV-19 vaccine prevents SARS-CoV-2 pneumonia in rhesus macaques	Nature		0028-0836	10.1038/s41586-020-2608-y		The ChAdOx1 nCoV-19 vaccine against SARS-CoV-2 induces an immune response in rhesus macaques and leads to reduced SARS-CoV-2 viral loads in respiratory tissues and an absence of pneumonia, but not to a reduction in nasal virus shedding, compared with unvaccinated animals. Severe acute respiratory syndrome coronavirus 2 (SARS-CoV-2) emerged in December 2019(1,2)and is responsible for the coronavir…	2020/10/22	2022/9/20 11:25	2022/9/20 11:25		578-+		7830	586		Nature								English							Place: Berlin Publisher: Nature Portfolio WOS:000577298500001				immunization; acute respiratory syndrome; mice
B7GZV8LB	journalArticle	2022	Ayyagari, Vijaya Sai; Venkateswarulu, T. C.; Peele, Abraham K.; Srirama, Krupanidhi	Design of a multi-epitope-based vaccine targeting M-protein of SARS-CoV2: an immunoinformatics approach	Journal of Biomolecular Structure & Dynamics		0739-1102	10.1080/07391102.2020.1850357		In the present study, one of the targets present on the envelopes of coronaviruses, membrane glycoprotein (M) was chosen for the design of a multi-epitope vaccine by Immunoinformatics approach. The B-cell and T-cell epitopes used for the construction of vaccine were antigenic, nonallergic and nontoxic. An adjuvant, beta-defensin and PADRE sequence were included at the N-terminal end of the vaccin…	2022/5/3	2022/9/20 11:25	2022/9/20 11:25		2963-2977		7	40		J. Biomol. Struct. Dyn.								English							Place: Philadelphia Publisher: Taylor & Francis Inc WOS:000596968800001				covid-19; SARS-CoV2; immunoinformatics; membrane glycoprotein; multi-epitope vaccine
C5VI65C9	journalArticle	2020	Mercado, Noe B.; Zahn, Roland; Wegmann, Frank; Loos, Carolin; Chandrashekar, Abishek; Yu, Jingyou; Liu, Jinyan; Peter, Lauren; McMahan, Katherine; Tostanoski, Lisa H.; He, Xuan; Martinez, David R.; Rutten, Lucy; Bos, Rinke; van Manen, Danielle; Vellinga, Jort; Custers, Jerome; Langedijk, Johannes P.; Kwaks, Ted; Bakkers, Mark J. G.; Zuijdgeest, David; Rosendahl Huber, Sietske K.; Atyeo, Caroline;…	Single-shot Ad26 vaccine protects against SARS-CoV-2 in rhesus macaques	Nature		0028-0836	10.1038/s41586-020-2607-z		A safe and effective vaccine for severe acute respiratory syndrome coronavirus 2 (SARS-CoV-2) may be required to end the coronavirus disease 2019 (COVID-19) pandemic(1-8). For global deployment and pandemic control, a vaccine that requires only a single immunization would be optimal. Here we show the immunogenicity and protective efficacy of a single dose of adenovirus serotype 26 (Ad26) vector-b…	2020/10/22	2022/9/20 11:25	2022/9/20 11:25		583-+		7830	586		Nature								English							Place: Berlin Publisher: Nature Portfolio WOS:000577298500002				coronavirus; antibodies; spike; efficacy; immunogenicity; immunity; reverse genetics; length infectious cdna
6UDBDJTH	journalArticle	2020	Zimmermann, Petra; Curtis, Nigel	Coronavirus Infections in Children Including COVID-19 An Overview of the Epidemiology, Clinical Features, Diagnosis, Treatment and Prevention Options in Children	Pediatric Infectious Disease Journal		0891-3668	10.1097/INF.0000000000002660		Coronaviruses (CoVs) are a large family of enveloped, single-stranded, zoonotic RNA viruses. Four CoVs commonly circulate among humans: HCoV2-229E, -HKU1, -NL63 and -OC43. However, CoVs can rapidly mutate and recombine leading to novel CoVs that can spread from animals to humans. The novel CoVs severe acute respiratory syndrome coronavirus (SARS-CoV) emerged in 2002 and Middle East respiratory sy…	20-May	2022/9/20 11:25	2022/9/20 11:25		355-368		5	39		Pediatr. Infect. Dis. J.								English							Place: Philadelphia Publisher: Lippincott Williams & Wilkins WOS:000532237900005				SARS-CoV-2; vaccines; epidemiology; prevention; spike protein; receptor-binding domain; treatment; respiratory syndrome coronavirus; symptoms; sars-coronavirus; severe acute respiratory syndrome coronavirus 2; hong-kong; laboratory; MERS-CoV; SARS-CoV; saudi-arabia; dipeptidyl peptidase 4; health-care settings; imaging; mers-cov infection; Middle East respiratory syndrome coronavirus; papain-like…
WTH9FVXF	journalArticle	2020	Sarkar, Bidisa; Sarkar, Kamalesh; Sengupta, Paramita	COVID control strategy--is there any light at the end of the tunnel?	Journal of Family Medicine and Primary Care		2249-4863	10.4103/jfmpc.jfmpc_1379_20		Context: India has been witnessing a huge surge of COVID-19 cases, with increasing number of new cases and deaths daily. There is yet no effective vaccine, drug or strategy to combat this disease. Various models of COVID-19 trend and management have been put forward by different researchers, yet no prediction has yet turned out to be close to the reality. Aims: To find an effective public health …	20-Nov	2022/9/20 11:25	2022/9/20 11:25		5502-5505		11	9		J. Fam. Med. Prim. Care								English							Place: Mumbai Publisher: Wolters Kluwer Medknow Publications WOS:000648443300015				super-spreaders; infectivity; Ahmedabad model; COVID transmission; cycle threshold
L5JV57F8	journalArticle	2020	Liu, Wei; Guan, Wei-Jie; Zhong, Nan-Shan	Strategies and Advances in Combating COVID-19 in China	Engineering		2095-8099	10.1016/j.eng.2020.10.003		Coronavirus disease 2019 (COVID-19)-the third in a series of coronavirus infections-has caused a global public health event in the 21st century, resulting in substantial global morbidity and mortality. Building on its legacy of managing severe acute respiratory syndrome (SARS) and Middle East respiratory syndrome (MERS), China has played a key role in the scientific community by revealing the vir…	20-Oct	2022/9/20 11:25	2022/9/20 11:25		1076-1084		10	6		Engineering								English							Place: Amsterdam Publisher: Elsevier WOS:000616414700007				infection; Vaccine; epidemiology; sars-cov-2; diagnosis; Coronavirus disease 2019; open-label; coronavirus disease 2019; mers; Immune response; Treatment; Inflammation; Angiotensin-converting enzyme; Clinical characteristics
YZ22Z55G	journalArticle	2020	Kodchakorn, Kanchanok; Poovorawan, Yong; Suwannakarn, Kamol; Kongtawelert, Prachya	Molecular modelling investigation for drugs and nutraceuticals against protease of SARS-CoV-2	Journal of Molecular Graphics & Modelling		1093-3263	10.1016/j.jmgm.2020.107717		The widespread problem of a 2019-novel coronavirus (SARS-CoV-2) strain outbreak inWuhan, China has prompted a search for new drugs to protect against and treat this disease. It is necessary to immediately investigate this due to the mutation of the viral genome and there being no current protective vaccines or therapeutic drugs. Molecular modelling and molecular docking based on in silico screeni…	20-Dec	2022/9/20 11:25	2022/9/20 11:25		107717			101		J. Mol. Graph.								English							Place: New York Publisher: Elsevier Science Inc WOS:000583378100009				SARS-CoV-2; Molecular docking; amber; Molecular dynamics simulation; software; dynamics simulations; Herbal medicines; particle mesh ewald; Protease inhibitors
7GAP377R	journalArticle	2020	Leung, Elaine Lai-Han; Pan, Hu-Dan; Huang, Yu-Feng; Fan, Xing-Xing; Wang, Wan-Ying; He, Fang; Cai, Jun; Zhou, Hua; Liu, Liang	The Scientific Foundation of Chinese Herbal Medicine against COVID-19	Engineering		2095-8099	10.1016/j.eng.2020.08.009		The recent coronavirus disease 2019 (COVID-19) pandemic outbreak has caused a serious global health emergency. Supporting evidence shows that COVID-19 shares a genomic similarity with other coronaviruses, such as severe acute respiratory syndrome coronavirus (SARS-CoV) and Middle East respiratory syndrome coronavirus (MERS-CoV), and that the pathogenesis and treatment strategies that were applied…	20-Oct	2022/9/20 11:25	2022/9/20 11:25		1099-1107		10	6		Engineering								English							Place: Amsterdam Publisher: Elsevier WOS:000616414700009				infection; inflammation; activation; inhibition; virus; Cytokine storm; ace2; in-vivo; Coronavirus disease 2019; Antiviral; Severe acute respiratory syndrome coronavirus; acute lung injury; Chinese herbal medicine; fibroblasts; induced pulmonary-fibrosis; Lung fibrosis
MJTSFVKZ	journalArticle	2020	Pashaki, P. Abbasi; Roudkenar, M. Habibi; Rahim, F.; Ebrahimi, A.	From SARS-CoV to SARS-CoV2: a potentia guide to better understanding of pathophysiology of the disease and potential therapeutic modality	European Review for Medical and Pharmacological Sciences		1128-3602	10.26355/eurrev_202007_22286		Currently, the outbreak and spread of coronavirus disease 2019 (COVID-19) caused by Severe Acute Respiratory Syndrome Coronavirus 2 (SARS-CoV-2), are increasing worldwide. Furthermore, it has been considered as a major challenge, which threatens human beings and affects all aspects of their life. Understanding the cellular and molecular pathophysiology of the disease is currently under the focus …	2020	2022/9/20 11:25	2022/9/20 11:25		7816-7825		14	24		Eur. Rev. Med. Pharmacol. Sci.								English							Place: Rome Publisher: Verduci Publisher WOS:000555882500027				covid-19; infection; SARS-CoV2; coronavirus; pneumonia; cell entry; replication; ace2; spike protein; expression; nucleocapsid protein; in-vitro; pathogenesis; SARS-CoV
U6KCKEYR	journalArticle	2020	Allawadhi, Prince; Khurana, Amit; Allwadhi, Sachin; Navik, Uma Shanker; Joshi, Kamaldeep; Banothu, Anil Kumar; Bharani, Kala Kumar	Potential of electric stimulation for the management of COVID-19	Medical Hypotheses		0306-9877	10.1016/j.mehy.2020.110259		The COVID-19 pandemic is the most devastating health emergency that humans have seen over the past century. The war against the disease has been handicapped by unavailability of effective therapeutic options. Till date, there is no clinically approved vaccine or drug for the treatment of COVID-19, and the ongoing search to find a novel therapy is progressing at pandemic pace. Herein, we propose a…	20-Nov	2022/9/20 11:25	2022/9/20 11:25		110259			144		Med. Hypotheses								English							Place: Edinburgh Publisher: Churchill Livingstone WOS:000594638700011				covid-19; Immunity; Hypothesis; Electric stimulation; Respiratory function
49F5BTG2	journalArticle	2021	Sherman, Susan M.; Smith, Louise E.; Sim, Julius; Amlot, Richard; Cutts, Megan; Dasch, Hannah; Rubin, G. James; Sevdalis, Nick	COVID-19 vaccination intention in the UK: results from the COVID-19 vaccination acceptability study (CoVAccS), a nationally representative cross-sectional survey	Human Vaccines & Immunotherapeutics		2164-5515	10.1080/21645515.2020.1846397		To investigate factors associated with intention to be vaccinated against COVID-19 we conducted a cross-sectional survey of 1,500 UK adults, recruited from an existing online research panel. Data were collected between 14th and 17th July 2020. We used linear regression analyses to investigate associations between intention to be vaccinated for COVID-19 "when a vaccine becomes available to you" an…	2021/6/3	2022/9/20 11:25	2022/9/20 11:25		1612-1621		6	17		Human Vaccines Immunother.								English							Place: Philadelphia Publisher: Taylor & Francis Inc WOS:000592636100001				covid-19; vaccine; attitudes; beliefs; model; spread; barriers; Hesitancy
5NEAFCXJ	journalArticle	2022	Ghosh, Rajesh; Chakraborty, Ayon; Biswas, Ashis; Chowdhuri, Snehasis	Computer aided identification of potential SARS CoV-2 main protease inhibitors from diterpenoids and biflavonoids of Torreya nucifera leaves	Journal of Biomolecular Structure & Dynamics		0739-1102	10.1080/07391102.2020.1841680		SARS CoV-2 is the causative agent of the pandemic disease COVID-19. There is an urgent need for effective drugs or vaccines which can effectively combat this outbreak. The main protease (Mpro), a key component for the SARS CoV-2 replication, is considered to be one of the important drug targets for developing anti-COVID-19 drugs. This SARS CoV-2 Mpro/cysteine protease has high sequence similarity…	2022/4/13	2022/9/20 11:25	2022/9/20 11:25		2647-2662		6	40		J. Biomol. Struct. Dyn.								English							Place: Philadelphia Publisher: Taylor & Francis Inc WOS:000584069600001				covid-19; coronavirus; binding; molecular-dynamics; design; docking; resistance; antiviral activities; mechanism; amentoflavone; hiv-1 protease; molecular dynamics simulation; mutations v32i; SARS CoV-2 main protease; Torreya nucifera diterpenoids and biflavonoids
SJQ57ACF	journalArticle	2020	Li, Wei; Chen, Chuan; Drelich, Aleksandra; Martinez, David R.; Gralinski, Lisa E.; Sun, Zehua; Schaefer, Alexandra; Kulkarni, Swarali S.; Liu, Xianglei; Leist, Sarah R.; Zhelev, Doncho V.; Zhang, Liyong; Kim, Ye-Jin; Peterson, Eric C.; Conard, Alex; Mellors, John W.; Tseng, Chien-Te K.; Falzarano, Darryl; Baric, Ralph S.; Dimitrov, Dimiter S.	Rapid identification of a human antibody with high prophylactic and therapeutic efficacy in three animal models of SARS-CoV-2 infection	Proceedings of the National Academy of Sciences of the United States of America		0027-8424	10.1073/pnas.2010197117		Effective therapies are urgently needed for the SARS-CoV-2/COVID-19 pandemic. We identified panels of fully human monoclonal antibodies (mAbs) from large phage-displayed Fab, scFv, and VH libraries by panning against the receptor binding domain (RBD) of the SARS-CoV-2 spike (S) glycoprotein. A high-affinity Fab was selected from one of the libraries and converted to a full-size antibody, IgG1 ab1…	2020/11/24	2022/9/20 11:25	2022/9/20 11:25		29832-29838		47	117		Proc. Natl. Acad. Sci. U. S. A.								English							Place: Washington Publisher: Natl Acad Sciences WOS:000594737400005				SARS-CoV-2; domain; glycoprotein; viruses; coronaviruses; respiratory syndrome coronavirus; sars-coronavirus; therapeutic antibodies; potent neutralizing antibodies; animal models; cross-reactive neutralization; hendra; nipah
ZIF8MWJ7	journalArticle	2020	Klimek, Ludger; Jutel, Marek; Akdis, Cezmi; Bousquet, Jean; Akdis, Mubeccel; Bachert, Claus; Agache, Ioana; Ansotegui, Ignacio; Bedbrook, Anna; Bosnic-Anticevich, Sinthia; Canonica, G. Walter; Chivato, Tomas; Cruz, Alvaro A.; Czarlewski, Wienia; Del Giacco, Stefano; Du, Hui; Fonseca, Joao A.; Gao, Yadong; Haahtela, Tari; Hoffmann-Sommergruber, Karin; Ivancevich, Juan-Carlos; Khaltaev, Nikolai; Kn…	Handling of allergen immunotherapy in the COVID-19 pandemic: An ARIA-EAACI statement	Allergy		0105-4538	10.1111/all.14336		The current COVID-19 pandemic influences many aspects of personal and social interaction, including patient contacts with health care providers and the manner in which allergy care is provided and maintained. Allergen-specific immunotherapy (AIT) is one of the most important treatment options for IgE-mediated allergies and is based on inducing an appropriate immune response in the allergic patien…	20-Jul	2022/9/20 11:25	2022/9/20 11:25		1546-1554		7	75		Allergy								English							Place: Hoboken Publisher: Wiley WOS:000562838200001				coronavirus; vaccines; mechanisms; asthma; allergy treatment; clinical immunotherapy; immunotherapy vaccines and mechanisms; venom allergy
MVHGMJP3	journalArticle	2020	Fahlberg, M. D.; Blair, R. V.; Doyle-Meyers, L. A.; Midkiff, C. C.; Zenere, G.; Russell-Lodrigue, K. E.; Monjure, C. J.; Haupt, E. H.; Penney, T. P.; Lehmicke, G.; Threeton, B. M.; Golden, N.; Datta, P. K.; Roy, C. J.; Bohm, R. P.; Maness, N. J.; Fischer, T.; Rappaport, J.; Vaccari, M.	Cellular events of acute, resolving or progressive COVID-19 in SARS-CoV-2 infected non-human primates	Nature Communications			10.1038/s41467-020-19967-4		Understanding SARS-CoV-2 associated immune pathology is crucial to develop pan-effective vaccines and treatments. Here we investigate the immune events from the acute state up to four weeks post SARS-CoV-2 infection, in non-human primates (NHP) with heterogeneous pulmonary pathology. We show a robust migration of CD16 expressing monocytes to the lungs occurring during the acute phase, and we desc…	2020/12/27	2022/9/20 11:25	2022/9/20 11:25		6078		1	11		Nat. Commun.								English							Place: Berlin Publisher: Nature Portfolio WOS:000596477900001				activation; receptor; replication; expression; in-vivo; sars coronavirus; rhesus; lung inflammation; myeloid cells; neutrophils
DWLCG7DK	journalArticle	2020	Nutho, Bodee; Mahalapbutr, Panupong; Hengphasatporn, Kowit; Pattaranggoon, Nawanwat Chainuwong; Simanon, Nattapon; Shigeta, Yasuteru; Hannongbua, Supot; Rungrotmongkol, Thanyada	Why Are Lopinavir and Ritonavir Effective against the Newly Emerged Coronavirus 2019? Atomistic Insights into the Inhibitory Mechanisms	Biochemistry		0006-2960	10.1021/acs.biochem.0c00160		Since the emergence of a novel coronavirus disease 2019 (COVID-19) caused by severe acute respiratory syndrome coronavirus 2 (SARS-CoV-2) was first reported from Wuhan, China, neither a specific vaccine nor an antiviral drug against SARS-CoV-2 has become available. However, a combination of two HIV-1 protease inhibitors, lopinavir and ritonavir, has been found to be effective against SARS-CoV, an…	2020/5/12	2022/9/20 11:25	2022/9/20 11:25		1769-1779		18	59		Biochemistry								English							Place: Washington Publisher: Amer Chemical Soc WOS:000535232800009				binding; sars; molecular-dynamics; protease; design; susceptibility; discovery; simulations; lopinavir/ritonavir; main proteinase
7YHPEQGL	journalArticle	2020	Peirlinck, Mathias; Linka, Kevin; Sahli Costabal, Francisco; Kuhl, Ellen	Outbreak dynamics of COVID-19 in China and the United States	Biomechanics and Modeling in Mechanobiology		1617-7959	10.1007/s10237-020-01332-5		On March 11, 2020, the World Health Organization declared the coronavirus disease 2019, COVID-19, a global pandemic. In an unprecedented collective effort, massive amounts of data are now being collected worldwide to estimate the immediate and long-term impact of this pandemic on the health system and the global economy. However, the precise timeline of the disease, its transmissibility, and the …	20-Dec	2022/9/20 11:25	2022/9/20 11:25		2179-2193		6	19		Biomech. Model. Mechanobiol.								English							Place: Heidelberg Publisher: Springer Heidelberg WOS:000529117800001				covid-19; Coronavirus; SEIR model; Epidemiology modeling; Network model
FSDVKUNC	journalArticle	2020	Nuismer, Scott L.; Bull, James J.	Self-disseminating vaccines to suppress zoonoses	Nature Ecology & Evolution		2397-334X	10.1038/s41559-020-1254-y		The SARS-CoV-2 epidemic is merely the most recent demonstration that our current approach to emerging zoonotic infectious disease is ineffective. SARS, MERS, Ebola, Nipah and an array of arenavirus infections sporadically spillover into human populations and are often contained only as a result of their poor transmission in human hosts, coupled with intense public health control efforts in the ea…	20-Sep	2022/9/20 11:25	2022/9/20 11:25		1168-1173		9	4		Nat. Ecol. Evol.								English							Place: London Publisher: Nature Publishing Group WOS:000553640500003				virus; prevention; vectors; current state; lassa fever; mastomys-natalensis; myxomatosis; polioviruses; rabbit hemorrhagic-disease; reservoir hosts
S2J7567Y	journalArticle	2020	Lindholm, Paul F.; Ramsey, Glenn; Kwaan, Hau C.	Passive Immunity for Coronavirus Disease 2019: A Commentary on Therapeutic Aspects Including Convalescent Plasma	Seminars in Thrombosis and Hemostasis		0094-6176	10.1055/s-0040-1712157		In the ongoing pandemic of coronavirus disease 2019 (COVID-19), the novel virus SARS-CoV-2 (severe acute respiratory syndrome coronavirus 2) is infecting a naive population. The innate immunity of the infected patient is unable to mount an effective defense, resulting in a severe illness with substantial morbidity and mortality. As most treatment modalities including antivirals and anti-inflammat…	20-Oct	2022/9/20 11:25	2022/9/20 11:25		796-803		7	46		Semin. Thromb. Hemost.								English							Place: New York Publisher: Thieme Medical Publ Inc WOS:000581821700008				covid-19; virus-infection; neutralizing antibodies; pneumonia; sars; influenza; immunity; acute respiratory syndrome; spike protein; receptor-binding domain; convalescent plasma; monoclonal-antibodies; immunoglobulin; mers; sars coronavirus
GPJ36LAY	journalArticle	2020	Peng, Qi; Peng, Ruchao; Yuan, Bin; Zhao, Jingru; Wang, Min; Wang, Xixi; Wang, Qian; Sun, Yan; Fan, Zheng; Qi, Jianxun; Gao, George F.; Shi, Yi	Structural and Biochemical Characterization of the nsp12-nsp7-nsp8 Core Polymerase Complex from SARS-CoV-2	Cell Reports		2211-1247	10.1016/j.celrep.2020.107774		The ongoing global pandemic of coronavirus disease 2019 (COVID-19) has caused a huge number of human deaths. Currently, there are no specific drugs or vaccines available for this virus (SARS-CoV-2). The viral polymerase is a promising antiviral target. Here, we describe the near-atomic-resolution structure of the SARSCoV-2 polymerase complex consisting of the nsp12 catalytic subunit and nsp7-nsp8…	2020/6/16	2022/9/20 11:25	2022/9/20 11:25		107774		11	31		Cell Reports								English							Place: Cambridge Publisher: Cell Press WOS:000541973800017				coronavirus; pneumonia; virus; protein; sars; replication; crystal-structure; insights; dependent rna-polymerase
85RTQ444	journalArticle	2020	Tincati, Camilla; Cannizzo, E. Stefania; Giacomelli, Mauro; Badolato, Raffaele; D'Arminio Monforte, Antonella; Marchetti, Giulia	Heightened Circulating Interferon-Inducible Chemokines, and Activated Pro-Cytolytic Th1-Cell Phenotype Features Covid-19 Aggravation in the Second Week of Illness	Frontiers in Immunology		1664-3224	10.3389/fimmu.2020.580987		Covid-19 features a delayed onset of critical illness occurring approximately one week from the beginning of symptoms, which corresponds to the bridging of innate and adaptive immunity. We reasoned that the immune events occurring at the turning point of disease might mark the direction toward pathogenic versus protective inflammatory responses. Subjects with either severe (s; PaO2/FiO2 ratio <20…	2020/10/20	2022/9/20 11:25	2022/9/20 11:25		580987			11		Front. Immunol.								English							Place: Lausanne Publisher: Frontiers Media Sa WOS:000583810500001				SARS-CoV-2; infection; Covid-19; t-cell responses; immunity; s; immunopathology; innate; sars coronavirus; immune activation; m; N protein-reactive T-cells
CAKLVUWV	journalArticle	2020	Rath, Rama Shankar; Lohiya, Ayush; Ahamed, Farhad; Kathiresan, Jeyashree; Suliankatchi, Rizwan Abdulkader	Public health response to COVID-19 in selected countries - Hits and misses	Journal of Family Medicine and Primary Care		2249-4863	10.4103/jfmpc.jfmpc_1482_20		Background: Lack of a cure or vaccine of COVID-19 forced us to rely on public health interventions (PHIs) for combating the pandemic. The main objective of the study to assess the PHI in selected countries and relate the various factors related to the intervention with the case load of the country. Methods: An ecological analysis was conducted using secondary data on PHIs and disease burden extra…	20-Nov	2022/9/20 11:25	2022/9/20 11:25		5580-5587		11	9		J. Fam. Med. Prim. Care								English							Place: Mumbai Publisher: Wolters Kluwer Medknow Publications WOS:000648443300027				covid-19; pandemic; lessons; spread; sars; influenza; interventions; public health interventions
S3KVF73E	journalArticle	2020	Hajjo, Rima; Sabbah, Dima A.; Bardaweel, Sanaa K.	Chemocentric Informatics Analysis: Dexamethasone Versus Combination Therapy for COVID-19	Acs Omega		2470-1343	10.1021/acsomega.0c03597		COVID-19 is a biphasic infectious disease with no approved vaccine or pharmacotherapy. The first drug that has shown promise in reducing COVID-19 mortality in severely-ill patients is dexamethasone, a cheap, well-known anti-inflammatory glucocorticoid, approved for the treatment of inflammatory conditions including respiratory diseases such as asthma and tuberculosis. However, about 80% of COVID-…	2020/11/24	2022/9/20 11:25	2022/9/20 11:25		29765-29779		46	5		ACS Omega								English							Place: Washington Publisher: Amer Chemical Soc WOS:000595527600015				lung; gene-expression; respiratory-distress-syndrome; airway mucus; connectivity map; glucocorticoid-receptor; growth-factor; inhaled corticosteroids; p38 mapk; salmeterol
6HIZXTFJ	journalArticle	2020	Skowronski, Danuta M.; Zou, Macy; Clarke, Quinten; Chambers, Catharine; Dickinson, James A.; Sabaiduc, Suzana; Olsha, Romy; Gubbay, Jonathan B.; Drews, Steven J.; Charest, Hugues; Winter, Anne-Luise; Jassem, Agatha; Murti, Michelle; Krajden, Mel; De Serres, Gaston	Influenza Vaccine Does Not Increase the Risk of Coronavirus or Other Noninfluenza Respiratory Viruses: Retrospective Analysis From Canada, 2010-2011 to 2016-2017	Clinical Infectious Diseases		1058-4838	10.1093/cid/ciaa626		Influenza vaccine effectiveness against influenza and noninfluenza respiratory viruses (NIRVs) was assessed by test-negative design using historic datasets of the community-based Canadian Sentinel Practitioner Surveillance Network, spanning 2010-2011 to 2016-2017. Vaccine significantly reduced the risk of influenza illness by >40% with no effect on coronaviruses or other NIRV risk.	2020/10/15	2022/9/20 11:25	2022/9/20 11:25		2285-2288		16	71		Clin. Infect. Dis.								English							Place: Cary Publisher: Oxford Univ Press Inc WOS:000595479200051				coronavirus; infections; influenza; vaccine effectiveness; respiratory viruses; nonspecific immunity
8XG9WWCR	journalArticle	2020	Oliva, Margeaux; Hsu, Karen; Alsamarai, Sarah; de Chavez, Vincent; Ferrara, Lauren	Clinical improvement of severe COVID-19 pneumonia in a pregnant patient after caesarean delivery	Bmj Case Reports			10.1136/bcr-2020-236290		The clinical implications of COVID-19 in pregnancy remain unknown. While preliminary reports demonstrate that pregnant patients have a similar symptomatic presentation to the general population, the appropriate management and timing of delivery in these patients is still unclear, as pregnancy may impose additional risk factors and impede recovery in gravid patients. In this brief report, we prese…	20-Jul	2022/9/20 11:25	2022/9/20 11:25		e236290		7	13		BMJ Case Rep.								English							Place: London Publisher: Bmj Publishing Group WOS:000661533400099				infectious diseases; immunological products and vaccines; obstetrics and gynaecology; tocilizumab
RA8ZKE9M	journalArticle	2020	Song, Ki-Han; Choi, Solsaem	A Study on the Behavioral Change of Passengers on Sustainable Air Transport after COVID-19	Sustainability			10.3390/su12219207		From the perspective of the sustainability of aviation demand, we investigated passenger perceptions with regards to whether or not Korean people will resume the use of air transport after COVID-19. Based on five factors-the prevalence of COVID-19, requirements for self-isolation, circumstances at the destination, social atmosphere with regards to overseas travel, and level of preventative measur…	20-Nov	2022/9/20 11:25	2022/9/20 11:25		9207		21	12		Sustainability								English							Place: Basel Publisher: Mdpi WOS:000589404400001				drivers; models; decision; service; loyalty; taiwan; air transport sustainability; airline choice; airport choice; mixed logit; passenger behavior; structural equation modeling; travelers
5NSQNXPK	journalArticle	2020	Su, Yvonne C. F.; Anderson, Danielle E.; Young, Barnaby E.; Linster, Martin; Zhu, Feng; Jayakumar, Jayanthi; Zhuang, Yan; Kalimuddin, Shirin; Low, Jenny G. H.; Tan, Chee Wah; Chia, Wan Ni; Mak, Tze Minn; Octavia, Sophie; Chavatte, Jean-Marc; Lee, Raphael T. C.; Pada, Surinder; Tan, Seow Yen; Sun, Louisa; Yan, Gabriel Z.; Maurer-Stroh, Sebastian; Mendenhall, Ian H.; Leo, Yee-Sin; Lye, David Chien;…	Discovery and Genomic Characterization of a 382-Nucleotide Deletion in ORF7b and ORF8 during the Early Evolution of SARS-CoV-2	Mbio		2150-7511	10.1128/mBio.01610-20		To date, limited genetic changes in the severe acute respiratory syndrome coronavirus 2 (SARS-CoV-2) genome have been described. Here, we report a 382-nucleotide (nt) deletion in SARS-CoV-2 that truncates open reading frame 7b (ORF7b) and ORF8, removing the ORF8 transcription regulatory sequence (TRS) and eliminating ORF8 transcription. The earliest 382-nt deletion variant was detected in Singapo…	20-Aug	2022/9/20 11:25	2022/9/20 11:25		e01610-20		4	11		mBio								English							Place: Washington Publisher: Amer Soc Microbiology WOS:000572064700005				covid-19; vaccines; respiratory syndrome coronavirus; sars-coronavirus; phylogeny; bats; transcription; natural selection; orf8
ZLH9493C	journalArticle	2020	Rossi, Maxime; Piagnerelli, Michael; Van Meerhaeghe, Alain; Boudjeltia, Karim Zouaoui	Heme oxygenase-1 (HO-1) cytoprotective pathway: A potential treatment strategy against coronavirus disease 2019 (COVID-19)-induced cytokine storm syndrome	Medical Hypotheses		0306-9877	10.1016/j.mehy.2020.110242		The outbreak of coronavirus disease 2019 (COVID-19) requires urgent need for effective treatment. Severe COVID-19 is characterized by a cytokine storm syndrome with subsequent multiple organ failure (MOF) and acute respiratory distress syndrome (ARDS), which may lead to intensive care unit and increased risk of death. While awaiting a vaccine, targeting COVID-19-induced cytokine storm syndrome ap…	20-Nov	2022/9/20 11:25	2022/9/20 11:25		110242			144		Med. Hypotheses								English							Place: Edinburgh Publisher: Churchill Livingstone WOS:000593985800007				covid-19; SARS-CoV-2; Cytokine storm; induction; acute kidney injury; virus-replication; interleukin-10; Acute respiratory distress syndrome (ARDS); heme oxygenase-1 (HO-1); Hemin
9S7LSQLZ	journalArticle	2020	Zost, Seth J.; Gilchuk, Pavlo; Case, James Brett; Binshtein, Elad; Chen, Rita E.; Nkolola, Joseph P.; Schafer, Alexandra; Reidy, Joseph X.; Trivette, Andrew; Nargi, Rachel S.; Sutton, Rachel E.; Suryadevara, Naveenchandra; Martinez, David R.; Williamson, Lauren E.; Chen, Elaine C.; Jones, Taylor; Day, Samuel; Myers, Luke; Hassan, Ahmed O.; Kafai, Natasha M.; Winkler, Emma S.; Fox, Julie M.; Shrih…	Potently neutralizing and protective human antibodies against SARS-CoV-2	Nature		0028-0836	10.1038/s41586-020-2548-6		An analysis identifies human monoclonal antibodies that potently neutralize wild-type SARS-CoV-2 and protect animals from disease, including two that synergize in a cocktail, suggesting that these could be candidates for use as therapeutic agents for the treatment of COVID-19 in humans. The ongoing pandemic of coronavirus disease 2019 (COVID-19), which is caused by severe acute respiratory syndro…	2020/8/20	2022/9/20 11:25	2022/9/20 11:25		443-+		7821	584		Nature								English							Place: Berlin Publisher: Nature Portfolio WOS:000559167300001				mers-cov; spike; receptor; epitope; protein; respiratory syndrome coronavirus; sars coronavirus; human monoclonal-antibody; cryo-em structure; structural definition
FUVGYPTA	journalArticle	2020	Srivastava, A. K.; Dwivedi, N.; Dhand, C.; Khan, R.; Sathish, N.; Gupta, M. K.; Kumar, R.; Kumar, S.	Potential of graphene-based materials to combat COVID-19: properties, perspectives, and prospects	Materials Today Chemistry		2468-5194	10.1016/j.mtchem.2020.100385		Severe acute respiratory syndrome coronavirus 2 (SARS-CoV-2), a new virus in the coronavirus family that causes coronavirus disease (COVID-19), emerges as a big threat to the human race. To date, there is no medicine and vaccine available for COVID-19 treatment. While the development of medicines and vaccines are essentially and urgently required, what is also extremely important is the repurposi…	20-Dec	2022/9/20 11:25	2022/9/20 11:25		100385			18		Mater. Today Chem.								English							Place: Oxford Publisher: Elsevier Sci Ltd WOS:000599917000014				SARS-CoV-2; virus; technology; sensitive detection; sensor; Virus; biosensor; carbon; facile; Materials; Microbe; oxide; piezoelectric immunosensor; surface-plasmon resonance
K5WGQSWP	journalArticle	2020	Sumalapao, Derick Erl P.	Elucidation on the Physicochemical Properties of Potential and Clinically Approved Antiviral Drugs: A Search for Effective Therapies against SARS-CoV-2 Infection	Journal of Pure and Applied Microbiology		0973-7510	10.22207/JPAM.14.SPL1.41		COVID-19 has been confirmed in millions of individuals worldwide, rendering it a global medical emergency. In the absence of vaccines and the unavailability of effective drugs for the SARS-CoV-2 infection, vaccine development is being continuously explored and several antiviral compounds and immunotherapies are currently being investigated. Given the high similarity in genetic identity between SA…	20-May	2022/9/20 11:25	2022/9/20 11:25		1025-1034			14		J. Pure Appl. Microbiol.								English							Place: Bhopal Publisher: Dr M N Khan WOS:000538476900041				covid-19; virus; sars; replication; in-vitro; respiratory syndrome coronavirus; protease inhibitors; component; inhibitory potency; neuraminidase inhibitors; nucleoside analogues; principal component analysis; reverse transcriptase inhibitors
GH9XPB39	journalArticle	2021	Chatterjee, Shilpa; Maity, Arindam; Chowdhury, Suchana; Islam, Md Ataul; Muttinini, Ravi K.; Sen, Debanjan	In silico analysis and identification of promising hits against 2019 novel coronavirus 3C-like main protease enzyme	Journal of Biomolecular Structure & Dynamics		0739-1102	10.1080/07391102.2020.1787228		The recent outbreak of the 2019 novel coronavirus disease (COVID-19) has been proved as a global threat. No particular drug or vaccine has not yet been discovered which may act specifically against severe acute respiratory syndrome coronavirus-2 (SARS-CoV-2) and causes COVID-19. For this highly infectious virus, 3CL-like main protease (3CL(pro)) plays a key role in the virus life cycle and can be…	2021/9/22	2022/9/20 11:25	2022/9/20 11:25		5290-5303		14	39		J. Biomol. Struct. Dyn.								English							Place: Philadelphia Publisher: Taylor & Francis Inc WOS:000549632400001				covid-19; tool; design; inhibitors; cobicistat; drug hits; icatibant; ligand docking; main protease enzyme; nafarelin
X9AEI2DE	journalArticle	2020	Lei, Changhai; Qian, Kewen; Li, Tian; Zhang, Sheng; Fu, Wenyan; Ding, Min; Hu, Shi	Neutralization of SARS-CoV-2 spike pseudotyped virus by recombinant ACE2-Ig	Nature Communications			10.1038/s41467-020-16048-4		Severe acute respiratory syndrome coronavirus 2 (SARS-CoV-2) emerged in Wuhan, China, at the end of 2019, and there are currently no specific antiviral treatments or vaccines available. SARS-CoV-2 has been shown to use the same cell entry receptor as SARS-CoV, angiotensin-converting enzyme 2 (ACE2). In this report, we generate a recombinant protein by connecting the extracellular domain of human …	2020/4/24	2022/9/20 11:25	2022/9/20 11:25		2070		1	11		Nat. Commun.								English							Place: Berlin Publisher: Nature Portfolio WOS:000558640500001				coronavirus; receptor; angiotensin-converting enzyme; fibrosis
GNLVL7NR	journalArticle	2020	Alonso, Andres Mariano; Diambra, Luis	SARS-CoV-2 Codon Usage Bias Downregulates Host Expressed Genes With Similar Codon Usage	Frontiers in Cell and Developmental Biology		2296-634X	10.3389/fcell.2020.00831		Severe acute respiratory syndrome has spread quickly throughout the world and was declared a pandemic by the World Health Organization (WHO). The pathogenic agent is a new coronavirus (SARS-CoV-2) that infects pulmonary cells with great effectiveness. In this study we focus on the codon composition for the viral protein synthesis and its relationship with the protein synthesis of the host. Our an…	2020/8/20	2022/9/20 11:25	2022/9/20 11:25		831			8		Front. Cell. Dev. Biol.								English							Place: Lausanne Publisher: Frontiers Media Sa WOS:000567898000001				SARS-CoV-2; selection; virus; nucleocapsid protein; genome; complex; interferon-gamma; sars coronavirus; efficiency; translational control; codon optimality; codon usage bias; fibronectin; matrix gla protein; pathogeny; vaccine design
AK2HXLDB	journalArticle	2020	Shah, Chirag A.	Can roflumilast become steroid-sparing alternative in the treatment of COVID-19?	Medical Hypotheses		0306-9877	10.1016/j.mehy.2020.110246		According to WHO the worst of the COVID-19 pandemic is yet to come. Despite of the exceptional measures being undertaken by regulatory agencies to expedite vaccine development, we may be several months if not years away from an effective vaccine. In such unprecedented times, the only resort nations have at their disposal is to identify and repurpose existing drugs against COVID-19 based on their …	20-Nov	2022/9/20 11:25	2022/9/20 11:25		110246			144		Med. Hypotheses								English							Place: Edinburgh Publisher: Churchill Livingstone WOS:000594638700007				phosphodiesterase-4 inhibitor
X9CV3Y6Q	journalArticle	2020	Hassan, Mozan Osman; Osman, Asma Ahmed; Abd Elbasit, Hana Elsir; Hassan, Hanan Elsamani; Rufai, Hala; Satti, Maria M. M.; Elnegoumi, Musab; Idris, Roaa; Musa, Ashraf; Ali, Abdelhakam H.; Zroog, Susan Ali; Altayb, Abduelbagi D. A.; Khairy, Amna; Allam, Mushal; Abdelhalim, Asaad Tageldein Idris	Convalescent plasma as a treatment modality for coronavirus disease 2019 in Sudan	Transfusion and Apheresis Science		1473-0502	10.1016/j.transci.2020.102918		Coronavirus disease 2019 (COVID-19) is a disease spreading rapidly in Sudan, the rest of the African continent and the world with no known definitive treatment or vaccines. However, among many treatment interventions being tested globally, beneficial effects and clinical improvements have been reported when convalescent plasma is used for treating COVID-19 patients. We prepared a guiding protocol…	20-Dec	2022/9/20 11:25	2022/9/20 11:25		102918		6	59		Transfus. Apher. Sci.								English							Place: Oxford Publisher: Pergamon-Elsevier Science Ltd WOS:000619036900026				covid-19; SARS-CoV-2; infection; therapy; Treatment; Protocol; Convalescent plasma
XTIFLY25	journalArticle	2020	Bhadra, Abhi; Singh, Shweta; Chandrakar, Shaswat; Kumar, Vanshika; Sankhla, Sakshi; Raj, Sayuj T.; Selvarajan, E.	Current Clinical Trials and Vaccine Development Strategies for Corona Virus Disease (COVID-19)	Journal of Pure and Applied Microbiology		0973-7510	10.22207/JPAM.14.SPL1.36		Severe acute respiratory syndrome coronavirus 2 (SARS-CoV-2) has reached global epidemic status claiming more than 319K lives and affecting more than 4.81M people and counting worldwide. Considering the severity of the situation and low recovery rate many research institutions and pharmaceutical industries are rushing to learn more about this new virus and the morbid physiology of this disease wi…	20-May	2022/9/20 11:25	2022/9/20 11:25		979-988			14		J. Pure Appl. Microbiol.								English							Place: Bhopal Publisher: Dr M N Khan WOS:000538476900036				Cytokines; Remdesivir; Chloroquine; Hydroxychloroquine; Lopinavir; Ritonavir; Stem Cell Therapy
PZYRGQ32	journalArticle	2020	Kandeil, Ahmed; Gomaa, Mokhtar R.; El Taweel, Ahmed; Mostafa, Ahmed; Shehata, Mahmoud; Kayed, Ahmed E.; Kutkat, Omnia; Moatasim, Yassmin; Mahmoud, Sara H.; Kamel, Mina Nabil; Shama, Noura M. Abo; El Sayes, Mohamed; El-Shesheny, Rabeh; Yassien, Mahmoud A.; Webby, Richard J.; Kayali, Ghazi; Ali, Mohamed A.	Common childhood vaccines do not elicit a cross-reactive antibody response against SARS-CoV-2	Plos One		1932-6203	10.1371/journal.pone.0241471		Anecdotal evidence showed a negative correlation between Bacille Calmette-Guerin (BCG) vaccination and incidence of COVID-19. Incidence of the disease in children is much lower than in adults. It is hypothesized that BCG and other childhood vaccinations may provide some protection against SARS-CoV-2 infection through trained or adaptive immune responses. Here, we tested whether BCG, Pneumococcal,…	2020/10/28	2022/9/20 11:25	2022/9/20 11:25		e0241471		10	15		PLoS One								English							Place: San Francisco Publisher: Public Library Science WOS:000588374000069				infection; nonspecific protection; trained immunity; bcg vaccination
N73HVUX7	journalArticle	2021	Sturman, Daniel; Auton, Jaime C.; Thacker, Jemma	Knowledge of social distancing measures and adherence to restrictions during the COVID-19 pandemic	Health Promotion Journal of Australia		1036-1073	10.1002/hpja.443		Issue addressed With no efficacious treatments or vaccines available, social distancing measures remain the most effective approach for reducing the transmission of the COVID-19 virus. However, adherence to social distance measures presumably requires knowledge and understanding of the current social distancing restrictions. Methods A modified version of the Theory of Planned Behaviour examined t…	21-Apr	2022/9/20 11:25	2022/9/20 11:25		344-351		2	32		Health Promot. J. Aust.								English							Place: Hoboken Publisher: Wiley WOS:000598751300001				epidemiology; social determinants; planned behavior; behavioural theory; extended theory; local government; prevention measures; quantitative methods
J3ZZTKZB	journalArticle	2020	Subbaiyan, Anbazhagan; Ravichandran, Karthikeyan; Singh, Shiv Varan; Sankar, Muthu; Thomas, Prasad; Dhama, Kuldeep; Malik, Yashpal S.; Singh, Raj Kumar; Chaudhuri, Pallab	In silico Molecular Docking Analysis Targeting SARS-CoV-2 Spike Protein and Selected Herbal Constituents	Journal of Pure and Applied Microbiology		0973-7510	10.22207/JPAM.14.SPL1.37		In modern drug discovery, molecular docking analysis is routinely used to understand and predict the interaction between a drug molecule and a target protein from a microbe. Drugs identified in this way may inhibit the entry and replication of pathogens in host cells. The SARS-CoV-2 associated coronavirus disease, COVID-19, has become the most contagious and deadly pandemic disease in the world t…	20-May	2022/9/20 11:25	2022/9/20 11:25		989-998			14		J. Pure Appl. Microbiol.								English							Place: Bhopal Publisher: Dr M N Khan WOS:000538476900037				covid-19; SARS-CoV-2; virus; sars; spike protein; molecular docking; ligands; medicine; antiviral activity; herbal medicine; aloe-emodin; in-silico
JI3GSJM2	journalArticle	2020	Kharisma, Viol Dhea; Ansori, Arif Nur Muhammad	Construction of Epitope-Based Peptide Vaccine Against SARS-CoV-2: Immunoinformatics Study	Journal of Pure and Applied Microbiology		0973-7510	10.22207/JPAM.14.SPL1.38		Recently, a novel coronavirus (SARS-CoV-2) appeared which is conscientious for the current outbreak in China and rapidly spread worldwide. Unluckily, there is no approved vaccine found against SARS-CoV-2. Therefore, there is an urgent need for designing a suitable peptide vaccine constituent against the SARS-CoV-2. In this study, we characterized the spike glycoprotein of SARS-CoV-2 to obtain imm…	20-May	2022/9/20 11:25	2022/9/20 11:25		999-1005			14		J. Pure Appl. Microbiol.								English							Place: Bhopal Publisher: Dr M N Khan WOS:000538476900038				SARS-CoV-2; Coronavirus; Immunoinformatics; Epitope-based peptide vaccine
T8N8C26D	journalArticle	2020	Singh, Bhoj R.; Gandharva, Richa; Karthikeyan, R.; Singh, Shiv Varan; Yadav, Akanksha; Kumar, Vinodh O. R.; Sinha, Dharmendra K.; Jayakumar, Varsha; Dhama, Kuldeep; Kumar, Dharmender; Gandharava, Sumedha	Epidemiological Determinants of Acute Respiratory Syndrome Coronavirus-2 Disease Pandemic and The Role of the Bacille-Calmette-Guerin Vaccine in Reducing Morbidity and Mortality	Journal of Pure and Applied Microbiology		0973-7510	10.22207/JPAM.14.SPL1.39		This study analyzed the determinants of morbidity, mortality, and case fatality rate (CFR) of the ongoing pandemic of severe acute respiratory syndrome coronavirus-2 disease 2019 (COVID-19). Data for 210 countries and territories available in public domains were analyzed in relation to mandatory vaccination with Bacille-Calmette-Guerin (BCG), population density, median age of the country populati…	20-May	2022/9/20 11:25	2022/9/20 11:25		1007-1016			14		J. Pure Appl. Microbiol.								English							Place: Bhopal Publisher: Dr M N Khan WOS:000538476900039				covid-19; SARS-CoV-2; Epidemiology; tb; BCG vaccine; cvd; Effectors; Poverty; ppp
7JSTEVHM	journalArticle	2020	Robson, B.	The use of knowledge management tools in viroinformatics. Example study of a highly conserved sequence motif in Nsp3 of SARS-CoV-2 as a therapeutic target	Computers in Biology and Medicine		0010-4825	10.1016/j.compbiomed.2020.103963		Knowledge management tools that assist in systematic review and exploration of scientific knowledge generally are of obvious potential importance in evidence based medicine in general, but also to the design of therapeutics based on the protein subsequences and fold motifs of virus proteins as considered here. Rapid access to bundles (clusters) of related elements of knowledge gathered from diver…	20-Oct	2022/9/20 11:25	2022/9/20 11:25		103963			125		Comput. Biol. Med.								English							Place: Oxford Publisher: Pergamon-Elsevier Science Ltd WOS:000587354800007				covid-19; SARS-CoV-2; Coronavirus; domain; inhibition; protease; inference; respiratory syndrome coronavirus; complex; language; escape; Bioinformatics; Mutations; adp-ribose-1''-monophosphatase; Conservation; decision support.; Knowledge management; Macro domain; Therapeutic; X domain
JJXV47QN	journalArticle	2020	da Motta Reis, Jose Salvador; Silva, Fernanda De Oliveira; Espuny, Maximilian; Lescura Alexandre, Larah Giffoni; Ferreira Motta Barbosa, Luis Cesar; Munhoz Bonassa, Ana Claudia; Faria, Amanda Marcondes; de Souza Sampaio, Nilo Antonio; Santos, Gilberto; de Oliveira, Otavio Jose	THE RAPID ESCALATION OF PUBLICATIONS ON COVID-19: A SNAPSHOT OF TRENDS IN THE EARLY MONTHS TO OVERCOME THE PANDEMIC AND TO IMPROVE LIFE QUALITY	International Journal for Quality Research		1800-6450	10.24874/IJQR14.03-19		With it's rapid contagion, the new coronavirus is spreading more and more around the world. Studies point out that the difficulty in solving this pandemic lies in the lack of identification of those infected for their symptoms, which sometimes do not exist. The objectives of this work are to carry out a bibliometric study, identifying the main countries, authors, journals, institutions and keywor…	2020	2022/9/20 11:25	2022/9/20 11:25		951-967		3	14		Int. J. Qual. Res.								English							Place: Kragujevac Publisher: Fac Engineering, Univ Kragujevac WOS:000562287400019				coronavirus; pneumonia; Covid-19; Pandemic; Sars-Cov-2; Bibliometric Study
DKB4W23P	journalArticle	2020	Addie, Diane; Houe, Lene; Maitland, Kirsty; Passantino, Giuseppe; Decaro, Nicola	Effect of cat litters on feline coronavirus infection of cell culture and cats	Journal of Feline Medicine and Surgery		1098-612X	10.1177/1098612X19848167		Objectives Feline infectious peritonitis (FIP) is caused by infection with feline coronavirus (FCoV). FCoV is incredibly contagious and transmission is via the faecal-oral route. FCoV infection, and therefore FIP, is most common in breeder and rescue catteries, where many cats are kept indoors, using litter trays. Whether it is possible to break the cycle of FCoV infection and reinfection using c…	20-Apr	2022/9/20 11:25	2022/9/20 11:25		350-357		4	22		J. Feline Med. Surg.								English							Place: London Publisher: Sage Publications Ltd WOS:000523905000012				vaccine; safety; virus; efficacy; polymerase-chain-reaction; Bentonite; cat litter; Dr Elsey; FCoV infection; Feline coronavirus; feline infectious peritonitis; fip; Fuller's earth; peritonitis; reducing virus load; virus inhibition
9RFE9546	journalArticle	2020	Olson, Brian; Cruz, Anthony; Chen, Lieyang; Ghattas, Mossa; Ji, Yeonji; Huang, Kunhui; Ayoub, Steven; Luchko, Tyler; McKay, Daniel J.; Kurtzman, Tom	An online repository of solvation thermodynamic and structural maps of SARS-CoV-2 targets	Journal of Computer-Aided Molecular Design		0920-654X	10.1007/s10822-020-00341-x		SARS-CoV-2 recently jumped species and rapidly spread via human-to-human transmission to cause a global outbreak of COVID-19. The lack of effective vaccine combined with the severity of the disease necessitates attempts to develop small molecule drugs to combat the virus. COVID19_GIST_HSA is a freely available online repository to provide solvation thermodynamic maps of COVID-19-related protein s…	20-Dec	2022/9/20 11:25	2022/9/20 11:25		1219-1228		12	34		J. Comput.-Aided Mol. Des.								English							Place: Dordrecht Publisher: Springer WOS:000568465700001				covid-19; protein; molecular-dynamics; parameters; discovery; water; Virtual screening; Drug discovery; inhomogeneous fluid approach; Rational lead modification; Solvation thermodynamics
F8IR95N4	journalArticle	2020	Ansori, Arif Nur Muhammad; Kharisma, Viol Dhea; Muttaqin, Sahal Sabilil; Antonius, Yulanda; Parikesit, Arli Aditya	Genetic Variant of SARS-CoV-2 Isolates in Indonesia: Spike Glycoprotein Gene	Journal of Pure and Applied Microbiology		0973-7510	10.22207/JPAM.14.SPL1.35		Severe acute respiratory syndrome coronavirus-2 (SARS-CoV-2), a novel coronavirus and the primary causative agent of coronavirus disease 2019 (COVID-19), first occurred in China and rapidly spread worldwide. The government of the Republic of Indonesia confirmed its first two cases of COVID-19 in March 2020. COVID-19 is a serious illness with no efficacious antiviral medication or approved vaccine…	20-May	2022/9/20 11:25	2022/9/20 11:25		971-978			14		J. Pure Appl. Microbiol.								English							Place: Bhopal Publisher: Dr M N Khan WOS:000538476900035				covid-19; SARS-CoV-2; Coronavirus; coronavirus; Mutation; Genetic composition
RAMHR9AA	journalArticle	2020	Jung, Lindsey S.; Gund, Tamara M.; Narayan, Mahesh	Comparison of Binding Site of Remdesivir and Its Metabolites with NSP12-NSP7-NSP8, and NSP3 of SARS CoV-2 Virus and Alternative Potential Drugs for COVID-19 Treatment	Protein Journal		1572-3887	10.1007/s10930-020-09942-9		Remdesivir was approved by the U.S.A. Food and Drug administration for emergency use to interfere with the replication of SARS CoV-2 virus (the agent that causes COVID-19) in adults and children hospitalized with severe disease. The crystal structure of the metabolite of remdesivir (Monophosphate of GS-441524) and NSP12-NSP8-NSP7 of SARS CoV-2 virus was recently reported. The crystal structures o…	20-Dec	2022/9/20 11:25	2022/9/20 11:25		619-630		6	39		Protein J.								English							Place: New York Publisher: Springer WOS:000589470500001				molecular docking; hepatitis-b vaccination; Remdesivir; search; Non-structural protein 3 (NSP3) of SARS CoV-2 virus; Virtual screening
RFQLCDQA	journalArticle	2020	Nikoloudis, Dimitris; Kountouras, Dimitrios; Hiona, Asimina	The frequency of combined IFITM3 haplotype involving the reference alleles of both rs12252 and rs34481144 is in line with COVID-19 standardized mortality ratio of ethnic groups in England	Peerj		2167-8359	10.7717/peerj.10402		Evidence was brought forward in England and the USA that Black, Asian, Latino and Minority Ethnic people exhibit higher mortality risk from COVID-19 than White people. While socioeconomic factors were suggested to contribute to this trend, they arguably do not explain the range of the differences observed, allowing for possible genetic implications. Almost concurrently, the analysis of a cohort i…	2020/11/12	2022/9/20 11:25	2022/9/20 11:25		e10402			8		PeerJ								English							Place: London Publisher: Peerj Inc WOS:000588575300009				covid-19; SARS-CoV-2; infection; Coronavirus; Pandemic; Cytokine storm; proteins; Bame; Ethnic groups; genetic variant rs12252-c; ifitm3; rs12252; rs34481144; severe influenza
4UFY4VCB	journalArticle	2020	Oberemok, V. V.; Laikova, K.; Yurchenko, K. A.; Marochkin, N. A.; Fomochkina, I. I.; Kubyshkin, A.	SARS-CoV-2 will constantly sweep its tracks: a vaccine containing CpG motifs in 'lasso' for the multi-faced virus	Inflammation Research		1023-3830	10.1007/s00011-020-01377-3		During the current COVID-19 pandemic, the global ratio between the dead and the survivors is approximately 1 to 10, which has put humanity on high alert and provided strong motivation for the intensive search for vaccines and drugs. It is already clear that if we follow the most likely scenario, which is similar to that used to create seasonal influenza vaccines, then we will need to develop impr…	20-Sep	2022/9/20 11:25	2022/9/20 11:25		801-812		9	69		Inflamm. Res.								English							Place: Basel Publisher: Springer Basel Ag WOS:000547811700001				SARS-CoV-2; Vaccine; influenza vaccination; COVID-19 pandemic; broadly neutralizing antibodies; in-vitro; sars coronavirus; hepatitis-c-virus; antisense oligonucleotides; bacterial-dna; cellular immune-responses; CpG motif; hcv infection; human-cells; Phosphorothioate oligonucleotides
LWYMD4P8	journalArticle		Dansana, Debabrata; Kumar, Raghvendra; Bhattacharjee, Aishik; Hemanth, D. Jude; Gupta, Deepak; Khanna, Ashish; Castillo, Oscar	Early diagnosis of COVID-19-affected patients based on X-ray and computed tomography images using deep learning algorithm	Soft Computing		1432-7643	10.1007/s00500-020-05275-y		The novel coronavirus infection (COVID-19) that was first identified in China in December 2019 has spread across the globe rapidly infecting over ten million people. The World Health Organization (WHO) declared it as a pandemic on March 11, 2020. What makes it even more critical is the lack of vaccines available to control the disease, although many pharmaceutical companies and research instituti…		2022/9/20 11:25	2022/9/20 11:25							Soft Comput.								English							Place: New York Publisher: Springer WOS:000563797300005				covid-19; pneumonia; cnn; neural-networks; CT scan; Decision tree; fuzzy-systems; Inception_V2; vgg-16; X-ray images
E4A82XGD	journalArticle	2020	Manuel Lozano, Jose; Mary Salazar, Luz; Torres, Angela; Arevalo-Jamaica, Adriana; Franco-Munoz, Carlos; Mercado-Reyes, Marcela; Ancizar Aristizabal, Fabio	COVID-19 Infection Detection and Prevention by SARS-CoV-2 Active Antigens: A Synthetic Vaccine Approach	Vaccines			10.3390/vaccines8040692		COVID-19, a global pandemic causing to date more than 50 million cases and more than a million deaths, has to be controlled. SARS-CoV-2 (severe acute respiratory syndrome coronavirus 2) was identified as the causative agent. Controversy about this virus origin and infectious mechanism for adapting to humans remains a matter for discussion. Among all strategies for obtaining safe and potent vaccin…	20-Dec	2022/9/20 11:25	2022/9/20 11:25		692		4	8		Vaccines								English							Place: Basel Publisher: Mdpi WOS:000601839600001				covid-19; SARS-CoV-2; peptide; pep-fold; antigen design; synthetic-vaccine candidate
DUP95PZX	journalArticle	2020	Hanafi, Hafizul Fahri; Wahab, Mohd Helmy; Wong, Kung-Teck; Selamat, Abu Zarrin; Adnan, Muhamad Hariz Muhamad; Naning, Fatin Hana	Mobile Augmented Reality Hand Wash (MARHw): Mobile Application to guide community to ameliorate handwashing effectiveness to oppose Covid-19 disease	International Journal of Integrated Engineering		2229-838X	10.30880/ijie.2020.12.05.027		The global concern about a new pandemic associated with the insufficiency of vaccines has necessitated basic practices of handwashing to get prevention in Covid-19 disease in modern health issues. At this point, due to that, the researchers develop a simple mobile application engaging augmented reality to educate the urban and rural community on a notable effect of basic infection prevention prac…	2020	2022/9/20 11:25	2022/9/20 11:25		217-223		5	12		Int. J. Integr. Eng.								English							Place: Johor Publisher: Univ Tun Hussein Onn Malaysia WOS:000558700400026				behavior; augmented reality and education; Hand wash
9SFGIRGX	journalArticle	2020	Merow, Cory; Urban, Mark C.	Seasonality and uncertainty in global COVID-19 growth rates	Proceedings of the National Academy of Sciences of the United States of America		0027-8424	10.1073/pnas.2008590117		The virus causing COVID-19 has spread rapidly worldwide and threatens millions of lives. It remains unknown, as of April 2020, whether summer weather will reduce its spread, thereby alleviating strains on hospitals and providing time for vaccine development. Early insights from laboratory studies and research on related viruses predicted that COVID-19 would decline with higher temperatures, humid…	2020/11/3	2022/9/20 11:25	2022/9/20 11:25		27456-27464		44	117		Proc. Natl. Acad. Sci. U. S. A.								English							Place: Washington Publisher: Natl Acad Sciences WOS:000587503000055				pandemic; SARS-CoV-2; coronavirus; transmission; outbreak; temperature; inactivation; humidity; climate; absolute-humidity; UV light
ZBDEVTUW	journalArticle	2020	Saha, Sangeeta; Samanta, G. P.; Nieto, Juan J.	Epidemic model of COVID-19 outbreak by inducing behavioural response in population	Nonlinear Dynamics		0924-090X	10.1007/s11071-020-05896-w		COVID-19 has spread around the world since December 2019, creating one of the greatest pandemics ever witnessed. According to the current reports, this is a situation when people need to be more careful and take the precaution measures more seriously, unless the condition may become even worse. Maintaining social distances and proper hygiene, staying at isolation or adopting the self-quarantine m…	20-Sep	2022/9/20 11:25	2022/9/20 11:25		455-487		1	102		Nonlinear Dyn.								English							Place: Dordrecht Publisher: Springer WOS:000562674600001				covid-19; Optimal control; Epidemic model; infectious-diseases; Behavioural response
8PSRFVLE	journalArticle	2020	Ellenberg, Susan S.	Clinical trials in the time of a pandemic	Clinical Trials		1740-7745	10.1177/1740774520939871		The first rumblings about a new coronavirus spreading in China were heard in January 2020. By the end of that month, the World Health Organization, recognizing the severity of the disease and the potential for global spread, had declared a public health emergency. By February 2020, cases had been identified in multiple countries, clinical trials of treatments with some biological plausibility had…	20-Oct	2022/9/20 11:25	2022/9/20 11:25		467-471		5	17		Clin. Trials								English							Place: London Publisher: Sage Publications Ltd WOS:000548551000001				covid-19; pandemic; vaccines; treatment; design; Clinical trials
35P8AZPU	journalArticle	2020	Ragni, Pietro; Marino, Massimiliano; Formisano, Debora; Bisaccia, Eufemia; Scaltriti, Stefania; Bedeschi, Emanuela; Grilli, Roberto	Association between Exposure to Influenza Vaccination and COVID-19 Diagnosis and Outcomes	Vaccines			10.3390/vaccines8040675		We explored whether influenza vaccination (IV) affects susceptibility to SARS-CoV-2 infection and clinical outcomes in COVID-19 patients in 17,608 residents of the Italian province of Reggio Emilia undergoing a SARS-CoV-2 test. Exposure to IV was ascertained and the strength of the association with SARS-CoV-2 positivity expressed with odds ratios (OR). Rates of hospitalisations and death in those…	20-Dec	2022/9/20 11:25	2022/9/20 11:25		675		4	8		Vaccines								English							Place: Basel Publisher: Mdpi WOS:000601727100001				covid-19; influenza vaccine; SARS-Cov-2; case-negative study; retrospective cohort study
KYNSIY2G	journalArticle	2020	Ali, Elrazi; Ziglam, Hisham; Kohla, Samah; Ahmed, Mohanad; Yassin, Mohamed	A Case of Fulminant Liver Failure in a 24-Year-Old Man with Coinfection with Hepatitis B Virus and SARS-CoV-2	American Journal of Case Reports			10.12659/AJCR.925932		Objective: Unusual clinical course Background: Coronavirus disease 2019 (COVID-19) is a newly emerging disease that is still not fully characterized. It is caused by severe acute respiratory syndrome coronavirus 2 (SARS-CoV-2), a novel virus that can be transmitted easily from human to human mainly by the respiratory route. Currently, there is no specific treatment for COVID-19 or a vaccine for p…	2020/10/13	2022/9/20 11:25	2022/9/20 11:25		e925932			21		Am. J. Case Rep.								English							Place: Melville Publisher: Int Scientific Information, Inc WOS:000579686000001				covid-19; reactivation; injury; Hepatitis B; Acute; Hepatitis; Liver Failure
QBWP6VHR	journalArticle	2021	Aktas, Ahmet; Tuzun, Burak; Aslan, Rukiye; Sayin, Koray; Ataseven, Hilmi	New anti-viral drugs for the treatment of COVID-19 instead of favipiravir	Journal of Biomolecular Structure & Dynamics		0739-1102	10.1080/07391102.2020.1806112		The SARS-CoV-2 virus is a major problem in the world right now. Currently, all the attention of research centers and governments globally are focused on the investigation of vaccination studies and the discovery of small molecules that inhibit the SARS-CoV-2 virus in the treatment of patients. The goal of this study was to locate small molecules to be used against COVID19 instead of favipiravir. …	2021/12/12	2022/9/20 11:25	2022/9/20 11:25		7263-7273		18	39		J. Biomol. Struct. Dyn.								English							Place: Philadelphia Publisher: Taylor & Francis Inc WOS:000558956800001				mm-pbsa; expression; covid19; molecular docking; favipiravir; adme; glide; RNA polymerase; solubility
TWGAD5FF	journalArticle	2020	Chutiphimon, Hattaya; Thipsunate, Apinya; Cherdchim, Atigun; Boonyaphak, Bootsarakam; Vithayasirikul, Panat; Choothong, Patiphan; Vichathai, Swit; Ngamchaliew, Pitchayanont; Vichitkunakorn, Polathep	Effectiveness of Innovation Media for Improving Physical Distancing Compliance during the COVID-19 Pandemic: A Quasi-Experiment in Thailand	International Journal of Environmental Research and Public Health			10.3390/ijerph17228535		To flatten the curve of COVID-19 infections, with no effective pharmacological interventions or vaccine available in the imminent future, public health responses must continue to rely on non-pharmacological interventions. We developed three innovation media to promote physical distancing compliance (i.e., a fearful picture, a red one-way arrow sign, and a norm-speech sticker). This study aimed to…	20-Nov	2022/9/20 11:25	2022/9/20 11:25		8535		22	17		Int. J. Environ. Res. Public Health								English							Place: Basel Publisher: Mdpi WOS:000594150900001				covid-19; interventions; physical distancing; innovation media
CMMUP2DA	journalArticle	2020	Musinguzi, Geofrey; Asamoah, Benedict Oppong	The Science of Social Distancing and Total Lock Down: Does it Work? Whom does it Benefit?	Electronic Journal of General Medicine		2516-3507	10.29333/ejgm/7895		COVID-19 is spiralling like wild fire and has caused a global mayhem. Many lives have already been lost, and the global economy is at stake. In the absence of vaccine, social distancing and total lock down is the current mainstay in efforts to mitigate and flatten the epidemic curves. Several countries across the globe are currently implementing social distancing and total lock downs. However, wh…	20-Dec	2022/9/20 11:25	2022/9/20 11:25		em230		6	17		Electron. J. Gen. Med.								English							Place: London Publisher: Modestum Ltd WOS:000575918600004				covid-19; sars-cov-2; social distancing; china; total lock down
28ZJ8VCE	journalArticle	2020	Neiva, Mariane Barros; Carvalho, Isabelle; Costa Filho, Etevaldo dos Santos; Barbosa-Junior, Francisco; Bernardi, Filipe Andrade; Michelin Sanches, Tiago Lara; de Oliveira, Lariza Laura; Lima, Vinicius Costa; Brandao Miyoshi, Newton Shydeo; Alves, Domingos	Brazil: the emerging epicenter of COVID-19 pandemic	Revista Da Sociedade Brasileira De Medicina Tropical		0037-8682	10.1590/0037-8682-0550-2020		Introduction: Five months after the first confirmed case of COVID-19 in Brazil, the county has the second highest number of cases in the world. Without any scientifically proven drug or vaccine available combined with COVID-19's high transmissivity, slowing down the spread of the infection is a challenge. In an attempt to save the economy, the Brazilian government is slowly beginning to allow non…	2020	2022/9/20 11:25	2022/9/20 11:25		e20200550			53		Rev. Soc. Bras. Med. Trop.								English							Place: Brasilia Publisher: Soc Brasileira Medicina Tropical WOS:000586777400001				covid-19; Brazil; Pandemic; Sars-Cov-2
85GBPZHH	journalArticle	2021	Kumar, Sanjay; Kumar, Vineet; Awasthi, Uday; Vatsal, Manu; Singh, Sanjay Kumar	Modified SEIR model for prediction of COVID-19 outbreak trend in India with effectiveness of preventive care	Journal of Statistics and Management Systems		0972-0510	10.1080/09720510.2020.1833463		The outbreak of COVID 19 among community is a threat to society. The world is still looking for its vaccine in the market due to rapid growth in positive cases. The shutdown of essential service in global market due to COVID-19 has produced a threat to economic security and society growth. In present study, SEIR (Susceptible, Exposed, Infectious and Recovered) model using ode45 solver has been de…	2021/1/2	2022/9/20 11:25	2022/9/20 11:25		135-145		1	24		J. Stat. Manag. Syst.								English							Place: Abingdon Publisher: Taylor & Francis Ltd WOS:000597036800001				covid-19; Prediction; seir; Epidemic; Model; Ode45 solver
9MRGN6XF	journalArticle	2020	Doytchinova, Irini; Tchorbanov, Andrey	Design of Multi-Epitope Vaccine against SARS-CoV-2	Cybernetics and Information Technologies		1311-9702	10.2478/cait-2020-0072		The ongoing COVID-19 pandemic requires urgently specific therapeutics and approved vaccines. Here, the four structural proteins of the Severe Acute Respiratory Syndrome CoronaVirus 2 (SAES-CoV-2), the causative agent of COVID-19, are screened by in-house immunoinformatic tools to identify peptides acting as potential T-cell epitopes. In order to act as an epitope, the peptide should be processed …	2020	2022/9/20 11:25	2022/9/20 11:25		185-193		6	20		Cybern. Inf. Technol.								English							Place: Sofia Publisher: Inst Information & Communication Technologies-Bulgarian Acad Sciences WOS:000603117500018				covid-19; SARS-CoV-2; tool; spike; binding; association; antigen; gene; nucleocapsid protein; respiratory syndrome-coronavirus; susceptibility; mhc; SARS-CoV; multi-epitope vaccine; EpiDOCK; EpiJen; EpiTOP; high binders; HLA class I; HLA class II
RAAVESPP	journalArticle	2020	Borah, Rashmi	Every Minute Matters: Improving the Regulatory Response to Vaccine Development During a Public Health Emergency	Food and Drug Law Journal		1064-590X			In recent months, our lives have been turned upside down by the novel coronavirus (COVID-19) emergency. With no cure or vaccine in sight, millions of people have contracted the virus, and the death toll has surpassed that of World War I in a fraction of the time. In fact, the past decade has been marked by a series of highly publicized public health emergencies, including the devastating Ebola an…	2020	2022/9/20 11:25	2022/9/20 11:25		311-345		2	75		Food Drug Law J.								English							Place: Washington Publisher: Food Drug Law Inst WOS:000606626100008				ip-preparedness
7JV8ALK7	journalArticle	2020	Anonymous	Bacille Calmette-Guerin (BCG) vaccination and COVID-19. Scientific brief	Pediatria I Medycyna Rodzinna-Paediatrics and Family Medicine		1734-1531	10.15557/PiMR.2020.0025			2020	2022/9/20 11:25	2022/9/20 11:25		124-124		1	16		Pediatr. Med. Rodz.								English							Place: Warszawa Publisher: Medical Communications WOS:000549266900023
PD84FL5D	journalArticle	2020	Walls, Alexandra C.; Park, Young-Jun; Tortorici, M. Alejandra; Wall, Abigail; McGuire, Andrew T.; Veesler, David	Structure, Function, and Antigenicity of the SARS-CoV-2 Spike Glycoprotein	Cell		0092-8674	10.1016/j.cell.2020.02.058		The emergence of SARS-CoV-2 has resulted in >90,000 infections and >3,000 deaths. Coronavirus spike (S) glycoproteins promote entry into cells and are the main target of antibodies. We show that SARS-CoV-2 S uses ACE2 to enter cells and that the receptor-binding domains of SARS-CoV-2 S and SARS-CoV S bind with similar affinities to human ACE2, correlating with the efficient spread of SARS-CoV-2 a…	2020/4/16	2022/9/20 11:25	2022/9/20 11:25		281-+		2	181		Cell								English							Place: Cambridge Publisher: Cell Press WOS:000526184900012				mers-cov; cell entry; respiratory syndrome coronavirus; molecular evolution; human monoclonal-antibody; cryo-em structure; potent neutralization; bat coronavirus; syndrome sars coronavirus; to-human transmission
6T2IDSWW	journalArticle	2020	Sharif, Nadim; Dey, Shuvra K.	Phylogenetic and whole genome analysis of first seven SARS-CoV-2 isolates in Bangladesh	Future Virology		1746-0794	10.2217/fvl-2020-0201		Aim: Whole genome and peptide mutation analysis can specify effective vaccine and therapeutics against severe acute respiratory coronavirus-2 (SARS-CoV-2). Materials & methods: Whole genome similarity for Bangladeshi SARS-CoV-2 was determined using ClustalW and BLASTn. Phylogenetic analysis was conducted using neighbor-joining method. Results: 100% of isolates in Bangladesh were in the G clade. W…	20-Nov	2022/9/20 11:25	2022/9/20 11:25		735-746		11	15		Future Virol.								English							Place: London Publisher: Future Medicine Ltd WOS:000592404800001				SARS-CoV-2; vaccine; spike protein; mutation; Bangladesh; genome; therapeutics
7BC3VUPY	journalArticle	2020	Zafar, Nishat; Aslam, Muhammad Aamir; Ali, Ashiq; Khatoon, Aisha; Nazir, Abdul; Tanveer, Qaisar; Bilal, Muhammad; Kanwar, Rabia; Qadeer, Azka; Sikandar, Muhammad; Zafar, Abdullah	Probiotics: Helpful for the prevention of COVID-19?	Biomedical Research and Therapy		2198-4093	10.15419/bmrat.v7i11.646		Up to now, no vaccine has been developed for COVID-19 treatment. Although many scientists are working for the rapid development of a vaccine to control this pandemic, nonetheless, it will take time. If the vaccine will be developed soon, it will not be available to the entire world instantly since the mass production of the vaccine will take time. In this scenario, we will have to take alternativ…	2020	2022/9/20 11:25	2022/9/20 11:25		4086-4099		11	7		Biomed. Res. Ther.								English							Place: Ho Chi Minh Publisher: Biomedpress WOS:000602585900001				covid-19; risk; coronavirus; infections; sars; Immune stimulation; Probiotics
7BPE2PN5	journalArticle	2020	Oliveira, Sergio C.; de Magalhaes, Mariana T. Q.; Homan, E. Jane	Immunoinformatic Analysis of SARS-CoV-2 Nucleocapsid Protein and Identification of COVID-19 Vaccine Targets	Frontiers in Immunology		1664-3224	10.3389/fimmu.2020.587615		COVID-19 is a worldwide emergency; therefore, there is a critical need for foundational knowledge about B and T cell responses to SARS-CoV-2 essential for vaccine development. However, little information is available defining which determinants of SARS-CoV-2 other than the spike glycoprotein are recognized by the host immune system. In this study, we focus on the SARS-CoV-2 nucleocapsid protein a…	2020/10/28	2022/9/20 11:25	2022/9/20 11:25		587615			11		Front. Immunol.								English							Place: Lausanne Publisher: Frontiers Media Sa WOS:000588023700001				vaccine; coronavirus; virus; outbreak; immune-responses; B cells; peptides; acute respiratory syndrome; nucleocapsid; epitopes; t-cell; severe acute respiratory syndrome coronavirus 2; T cells; chimera; Coronavirus Disease 2019; rna-binding domain
YCT9ZW2S	journalArticle	2020	Catton, Howard	Nursing and health policy perspectives 2020-a year to remember or one to forget?	International Nursing Review		0020-8132	10.1111/inr.12647		2020 has certainly been a year of challenges for nurses and healthcare workers around the world with the relentless spread of COVID-19. These challenges are many, including countries and health systems not being prepared for a pandemic, shortages of personal protective equipment and acute shortages of nurses, poor communication from governments and the lack of accurate data regarding COVID-19 mor…	20-Dec	2022/9/20 11:25	2022/9/20 11:25		450-452		4	67		Int. Nurs. Rev.								English							Place: Hoboken Publisher: Wiley WOS:000607281100003				covid-19; Vaccination; Pandemic; Nurses; Personal Protective Equipment; Nursing Burnout; Psychological Distress
JF8IB2ZY	journalArticle	2020	Alzoughool, Foad; Alanagreh, Lo'ai	Coronavirus drugs: Using plasma from recovered patients as a treatment for COVID-19	International Journal of Risk & Safety in Medicine		0924-6479	10.3233/JRS-201017		The ongoing COVID-19 pandemic has infected nearly 3,582,233 individuals with 248,558 deaths since it was first identified in human populations in December 2019 in Wuhan, China. No antiviral therapies or vaccines are available for their treatment or prevention. Passive immunization PI through broadly neutralizing antibodies that bind to the specific antigens of SARS-CoV 2 might be a potential solu…	2020	2022/9/20 11:25	2022/9/20 11:25		47-51		2	31		Int. J. Risk Saf. Med.								English							Place: Amsterdam Publisher: Ios Press WOS:000541094800003				covid-19; sars; convalescent plasma; coronaviruses; bat; passive immunization
4AUMX6SG	journalArticle	2020	da Silva Oliveira, Luanda Mara; Tiyo, Bruna Tiaki; da Silva, Lais Teodoro; Marcondes Fonseca, Luiz Augusto; Rocha, Rosana Coura; dos Santos, Vera Aparecida; Ceneviva, Carina; Bedin, Anderson Aparecido; de Almeida, Alexandre; da Silva Duarte, Alberto Jose; Oshiro, Telma Miyuki	Prevalence of anti-SARS-CoV-2 antibodies in outpatients of a large public university hospital in Sao Paulo, Brazil	Revista Do Instituto De Medicina Tropical De Sao Paulo		0036-4665	10.1590/S1678-9946202062091		Coronavirus disease 19 (COVID-19) is caused by SARS-Cov-2 and the manifestations of this infection range from an absence of symptoms all the way up to severe disease leading to death. To estimate the prevalence of past infection in a population, the most readily available method is the detection of antibodies against the virus. This study has investigated the prevalence of anti-SARS-CoV-2 antibod…	2020	2022/9/20 11:25	2022/9/20 11:25		e91			62		Rev. Inst. Med. Trop. Sao Paulo								English							Place: Sao Paulo Publisher: Inst Medicina Tropical Sao Paulo WOS:000592881800005				covid-19; Anti-SARS-CoV-2 antibodies; Serological inquiry
XRPIAIWS	journalArticle	2020	Horecka, Kevin; Ratnayaka, Nipuni; Davis, Elizabeth A.	Changes in Mass Treatment of the Canine Parvovirus ICU Population in Relation to Public Policy Changes during the COVID-19 Pandemic	Viruses-Basel			10.3390/v12121419		Previous work has indicated that canine parvovirus (CPV) prevalence in the Central Texas region may follow yearly, periodic patterns. The peak in CPV infection rates occurs during the summer months of May and June, marking a distinct "CPV season". We hypothesized that human activity contributes to these seasonal changes in CPV infections. The COVID-19 pandemic resulted in drastic changes in human…	20-Dec	2022/9/20 11:25	2022/9/20 11:25		1419		12	12		Viruses-Basel								English							Place: Basel Publisher: Mdpi WOS:000602362000001				covid-19; infection; vaccination; efficacy; interference; risk-factors; protocol; duration; canine; canine parvovirus; dogs; enteritis; maternal antibody; veterinary epidemiology
LZIEXSJM	journalArticle	2020	Sheikh, Abdullah; Al-Taher, Abdulla; Al-Nazawi, Mohammed; Al-Mubarak, Abdullah; Kandeel, Mahmoud	Analysis of preferred codon usage in the coronavirus N genes and their implications for genome evolution and vaccine design	Journal of Virological Methods		0166-0934	10.1016/j.jviromet.2019.113806		The nucleocapsid (N) protein of a coronavirus plays a crucial role in virus assembly and in its RNA transcription. It is important to characterize a virus at the nucleotide level to discover the virus's genomic sequence variations and similarities relative to other viruses that could have an impact on the functions of its genes and proteins. This entails a comprehensive and comparative analysis o…	20-Mar	2022/9/20 11:25	2022/9/20 11:25		113806			277		J. Virol. Methods								English							Place: Amsterdam Publisher: Elsevier WOS:000514255500007				Coronavirus; virus; monoclonal-antibody; spike protein; nucleocapsid protein; purification; bias; patterns; pressure; Amino acid; bacterial genes; Codon bias; Nucleocapsid protein; Preferred nucleotides; sars-associated coronavirus
Y5VD4EHS	journalArticle	2020	Boonyaratanakornkit, Jim; Englund, Janet A.; Magaret, Amalia S.; Bu, Yunqi; Tielsch, James M.; Khatry, Subarna K.; Katz, Joanne; Kuypers, Jane; Shrestha, Laxman; LeClerq, Steven C.; Steinhoff, Mark C.; Chu, Helen Y.	Primary and Repeated Respiratory Viral Infections Among Infants in Rural Nepal	Journal of the Pediatric Infectious Diseases Society		2048-7193	10.1093/jpids/piy107		Background. Respiratory viruses cause significant morbidity and death in infants; 99% of such deaths occur in resource-limited settings. Risk factors for initial and repeated respiratory viral infections in young infants in resource-limited settings have not been well described. Methods. From 2011 to 2014, a birth cohort of infants in rural Nepal was enrolled and followed with weekly household-ba…	20-Mar	2022/9/20 11:25	2022/9/20 11:25		21-29		1	9		J. Pediatr. Infect. Dis. Soc.								English							Place: Oxford Publisher: Oxford Univ Press WOS:000559003800005				risk; coronavirus; epidemiology; reinfection; influenza virus; illness; infants; rhinovirus; patterns; rsv; parainfluenza virus; gestational-age; influenza immunization; pcr assays; respiratory viruses; syncytial virus-infection
QCDTHMT4	journalArticle	2020	Antunes de Brito, Carlos Alexandre; Andrade Lima, Petrus Moura; Moraes de Brito, Marina Coelho; de Oliveira, Daniela Barbosa	Second Episode of COVID-19 in Health Professionals: Report of Two Cases	International Medical Case Reports Journal		1179-142X	10.2147/IMCRJ.S277882		Although primary infection has been shown to prevent reinfection of SARS-CoV2 (severe acute respiratory syndrome coronavirus 2) in animal models, gaps in the understanding of the immune response to the virus have not been adequately addressed, and some cases of possible reinfection have been reported; however, the frequency, relevance and proof of these events have yet to be determined. We report…	2020	2022/9/20 11:25	2022/9/20 11:25		471-475			13		INT. MED. CASE REP. J.								English							Place: Albany Publisher: Dove Medical Press Ltd WOS:000575113900001				covid-19; SARS-CoV-2; antibody; reinfection
CMRHY5FC	journalArticle	2020	Geller, Anne; Yan, Jun	Could the Induction of Trained Immunity by beta-Glucan Serve as a Defense Against COVID-19?	Frontiers in Immunology		1664-3224	10.3389/fimmu.2020.01782		As the SARS-CoV-2 virus wreaks havoc on the populations, health care infrastructures and economies of nations around the world, finding ways to protect health care workers and bolster immune responses in the general population while we await an effective vaccine will be the difference between life and death for many people. Recent studies show that innate immune populations may possess a form of …	2020/7/14	2022/9/20 11:25	2022/9/20 11:25		1782			11		Front. Immunol.								English							Place: Lausanne Publisher: Frontiers Media Sa WOS:000556581400001				covid-19; SARS-CoV-2; double-blind; t-cell responses; cytokine storm; trained immunity; influenza-virus; interferon-gamma; innate immunity; dendritic cells; beta-glucan; candida-albicans; host-defense; low-virulence; yeast (1,3)-(1,6)-beta-glucan
7XU75DMD	journalArticle	2020	McGregor, Reuben; Whitcombe, Alana L.; Sheen, Campbell R.; Dickson, James M.; Day, Catherine L.; Carlton, Lauren H.; Sharma, Prachi; Lott, J. Shaun; Koch, Barbara; Bennett, Julie; Baker, Michael G.; Ritchie, Stephen R.; Fox-Lewis, Shivani; Morpeth, Susan C.; Taylor, Susan L.; Roberts, Sally A.; Webb, Rachel H.; Moreland, Nicole J.	Collaborative networks enable the rapid establishment of serological assays for SARS-CoV-2 during nationwide lockdown in New Zealand	Peerj		2167-8359	10.7717/peerj.9863		Background: Serological assays that detect antibodies to SARS-CoV-2 are critical for determining past infection and investigating immune responses in the COVID-19 pandemic. We established ELISA-based immunoassays using locally produced antigens when New Zealand went into a nationwide lockdown and the supply chain of diagnostic reagents was a widely held domestic concern. The relationship between …	2020/9/3	2022/9/20 11:25	2022/9/20 11:25		e9863			8		PeerJ								English							Place: London Publisher: Peerj Inc WOS:000565454500009				covid-19; SARS-CoV-2; Serology; Spike protein; Neutralising antibodies
7HXT9ECD	journalArticle	2021	Boopathi, Subramanian; Poma, Adolfo B.; Kolandaivel, Ponmalai	Novel 2019 coronavirus structure, mechanism of action, antiviral drug promises and rule out against its treatment	Journal of Biomolecular Structure & Dynamics		0739-1102	10.1080/07391102.2020.1758788		In the past two decades, the world has faced several infectious disease outbreaks. Ebola, Influenza A (H1N1), SARS, MERS, and Zika virus have had a massive global impact in terms of economic disruption, the strain on local and global public health. Most recently, the global outbreak of novel coronavirus 2019 (SARS-CoV-2) that causes COVID-19 is a newly discovered virus from the coronavirus family…	2021/6/13	2022/9/20 11:25	2022/9/20 11:25		3409-3418		9	39		J. Biomol. Struct. Dyn.								English							Place: Philadelphia Publisher: Taylor & Francis Inc WOS:000532152900001				covid-19; Coronavirus; spike; binding; sars; design; inhibitors; main protease; azithromycin; chloroquine; antiviral drugs; ion channels; ACE2 receptor; computational simulation; coronavirus Spike
QTQ22R82	journalArticle	2020	Panda, Pritam Kumar; Arul, Murugan Natarajan; Patel, Paritosh; Verma, Suresh K.; Luo, Wei; Rubahn, Horst-Gunter; Mishra, Yogendra Kumar; Suar, Mrutyunjay; Ahuja, Rajeev	Structure-based drug designing and immunoinformatics approach for SARS-CoV-2	Science Advances		2375-2548	10.1126/sciadv.abb8097		The prevalence of respiratory illness caused by the novel SARS-CoV-2 virus associated with multiple organ failures is spreading rapidly because of its contagious human-to-human transmission and inadequate globalhealth care systems. Pharmaceutical repurposing, an effective drug development technique using existing drugs, could shorten development time and reduce costs compared to those of de novo …	20-Jul	2022/9/20 11:25	2022/9/20 11:25		eabb8097		28	6		Sci. Adv.								English							Place: Washington Publisher: Amer Assoc Advancement Science WOS:000548735600037				spike; binding; gromacs; protein
QWRB5EV3	journalArticle	2020	Bakar, Osman	The Link between Coronavirus and Darwin according to Pervez Hoodbhoy: A Critical Response	Intellectual Discourse		0128-4878			This paper provides a critical response to Pervez Hoodbhoy's article that first appeared in Dawn, Pakistan's leading newspaper in April 2020. Hoodbhoy, a well-known physicist in the country and a former associate of the Nobel laureate Abdus Salam, titled the article 'Corona - Our Debt to Darwin.' The article's main contention is that coronavirus reaffirms the truth of Darwin's theory of organic e…	2020	2022/9/20 11:25	2022/9/20 11:25		365-386		2	28		Intellect. Discourse								English							Place: Kuala Lumpur Publisher: Int Islamic Univ Malaysia, Press Research Management Center WOS:000609244200002				coronavirus; natural selection; Evolutionary theory; rationalism; tradition
7FAZE4J2	journalArticle	2020	Oualla, Karima; Nouiakh, Lamiae; Acharfi, Nisrine; Amaadour, Iamiae; Benbrahim, Zineb; Arifi, Samia; Mellas, Nawfel	How Is Morocco Reacting to COVID-19 Crisis in Anticancer Centers?	Cancer Control		1073-2748	10.1177/1073274820941973		The world is facing the pandemic linked to COVID-19 virus infection that has rapidly spread worldwide, and severe complications have been reported to occur in around a third of patients. To date, there is no approved vaccine or specific therapy against COVID-19, but many trials are ongoing with some of them showing promising results. It has been shown recently that patients with cancer are at hig…	20-Jul	2022/9/20 11:25	2022/9/20 11:25		1.07E+15		3	27		Cancer Control								English							Place: Thousand Oaks Publisher: Sage Publications Inc WOS:000560051700001				covid-19; Cancer; challenges; Africa; Morocco
P3GJGLLD	journalArticle	2020	Akalu, Yonas; Ayelign, Birhanu; Molla, Meseret Derbew	Knowledge, Attitude and Practice Towards COVID-19 Among Chronic Disease Patients at Addis Zemen Hospital, Northwest Ethiopia	Infection and Drug Resistance		1178-6973	10.2147/IDR.S258736		Purpose: The recent outbreak of coronavirus disease 2019 (COVID-19) is the worst global crisis after the Second World War. Since no successful treatment and vaccine have been reported, efforts to enhance the knowledge, attitudes, and practice of the public, especially the high-risk groups, are critical to manage COVID-19 pandemic. Thus, this study aimed to assess knowledge, attitude, and practice…	2020	2022/9/20 11:25	2022/9/20 11:25		1949-1960			13		Infect. Drug Resistance								English							Place: Albany Publisher: Dove Medical Press Ltd WOS:000547457000021				covid-19; knowledge; health; attitude; Ethiopia; practice; chronic disease patients
8JYDAFAP	journalArticle	2020	Kumar, Yogesh; Singh, Harvijay; Patel, Chirag N.	In silico prediction of potential inhibitors for the Main protease of SARS-CoV-2 using molecular docking and dynamics simulation based drug-repurposing	Journal of Infection and Public Health		1876-0341	10.1016/j.jiph.2020.06.016		Background: The rapidly enlarging COVID-19 pandemic caused by the novel SARS-corona virus-2 is a global public health emergency of an unprecedented level. Unfortunately no treatment therapy or vaccine is yet available to counter the SARS-CoV-2 infection, which substantiates the need to expand research efforts in this direction. The indispensable function of the main protease in virus replication …	20-Sep	2022/9/20 11:25	2022/9/20 11:25		1210-1223		9	13		J. Infect. Public Health								English							Place: London Publisher: Elsevier Science London WOS:000568662900004				covid-19; SARS-CoV-2; Coronavirus; sars; design; Drug repurposing; Docking; approved drugs; screen
KDWIA4T4	journalArticle	2020	Mahapatra, Soumya Ranjan; Sahoo, Susrita; Dehury, Budheswar; Raina, Vishakha; Patro, Shubhransu; Misra, Namrata; Suar, Mrutyunjay	Designing an efficient multi-epitope vaccine displaying interactions with diverse HLA molecules for an efficient humoral and cellular immune response to prevent COVID-19 infection	Expert Review of Vaccines		1476-0584	10.1080/14760584.2020.1811091		Background The novel SARS-CoV-2 coronavirus, the causative agent of the ongoing pandemic COVID-19 disease continues to infect people globally and has infected millions of humans worldwide. However, no effective vaccine against this virus exists. Method Using Immunoinformatics, epitopic sequences from multiple glycoproteins that play crucial role in pathogenesis were identified. Particularly, epit…	2020/9/1	2022/9/20 11:25	2022/9/20 11:25		871-885		9	19		Expert Rev. Vaccines								English							Place: Abingdon Publisher: Taylor & Francis Ltd WOS:000572530500001				covid-19; SARS-CoV-2; antibodies; sars-cov-2; spike protein; receptor-binding domain; nucleocapsid protein; strategy; cov; respiratory syndrome coronavirus; neutralization; sars coronavirus; immunoinformatics; multi-epitopic vaccine
BPM8TJHL	journalArticle	2020	He, Jiahua; Tao, Huanyu; Yan, Yumeng; Huang, Sheng-You; Xiao, Yi	Molecular Mechanism of Evolution and Human Infection with SARS-CoV-2	Viruses-Basel			10.3390/v12040428		The outbreak of a novel coronavirus, which was later formally named the severe acute respiratory coronavirus 2 (SARS-CoV-2), has caused a worldwide public health crisis. Previous studies showed that SARS-CoV-2 is highly homologous to SARS-CoV and infects humans through the binding of the spike protein to ACE2. Here, we have systematically studied the molecular mechanisms of human infection with S…	20-Apr	2022/9/20 11:25	2022/9/20 11:25		428		4	12		Viruses-Basel								English							Place: Basel Publisher: Mdpi WOS:000539525300070				SARS-CoV-2; coronavirus; spike; pneumonia; dynamics; china; outbreak; sars; coronaviruses; wuhan; MD simulations; docking; SARS-CoV; protein-protein; human infection; molecular mechanism; protein docking
2EINL488	journalArticle	2020	Prencipe, Luigi; Barberis, Serena; Perelli, Tamara; Tonelli, Tiziana	Pump up the lung and be stronger against COVID-19	Minerva Pneumologica		0026-4954	10.23736/S0026-4954.20.01874-X		The pathogenic mechanisms at the base of the coronavirus SARS-CoV-2 disease have not yet been clarified. Also, the strategy against COVID-19 is still primary prevention, as both chemoprophylaxis and vaccine are still in the works. Most observations on COVID-19 in Italy have been shared in real time on social networks in closed groups of professionals. These talks have been crucial to evaluate the…	20-Jun	2022/9/20 11:25	2022/9/20 11:25		33-37		2	59		Minerva Pneumol.								English							Place: Turin Publisher: Edizioni Minerva Medica WOS:000573769600004				covid-19; Coronavirus; parameters; Prevention and control; rehabilitation; positive-expiratory-pressure; Respiratory therapy
N4J9CH7L	journalArticle	2020	Kendall, Michelle; Milsom, Luke; Abeler-Dorner, Lucie; Wymant, Chris; Ferretti, Luca; Briers, Mark; Holmes, Chris; Bonsall, David; Abeler, Johannes; Fraser, Christophe	Epidemiological changes on the Isle of Wight after the launch of the NHS Test and Trace programme: a preliminary analysis	Lancet Digital Health			10.1016/S2589-7500(20)30241-7		Background In May 2020, the UK National Health Service (NHS) Test and Trace programme was launched in England in response to the COVID-19 pandemic. The programme was first rolled out on the Isle of Wight and included version 1 of the NHS contact tracing app. The aim of the study was to make a preliminary assessment of the epidemiological impact of the Test and Trace programme using publicly avail…	20-Dec	2022/9/20 11:25	2022/9/20 11:25		E658-E666		12	2		Lancet Digit. Health								English							Place: Amsterdam Publisher: Elsevier WOS:000594484100008
47F5VRAF	journalArticle	2020	Habayeb, Salim J.	Epidemics and Pandemics: Coronavirus Disease in the United States, Lessons Learned and Way Forward	World Medical & Health Policy		1948-4682	10.1002/wmh3.354		In spite of presumed readiness to confront infectious disease outbreaks, the United States was unprepared for the advent of the novel Coronavirus disease (COVID-19) in the early months of 2020. The response was slow, mired in ad hoc responses, lack of planning, challenges in supply chains and human resources, and discord in balancing public health measures with economic considerations arising fro…	20-Sep	2022/9/20 11:25	2022/9/20 11:25		218-222		3	12		World Med. Health Policy								English							Place: Hoboken Publisher: Wiley WOS:000553143300001				covid-19; influenza; lessons learned; spread in USA
LKKFBKGS	journalArticle	2020	Alfayadh, Naba M.; Gowdie, Peter J.; Akikusa, Jonathan D.; Easton, Mee Lee; Buttery, Jim P.	Vaccinations Do Not Increase Arthritis Flares in Juvenile Idiopathic Arthritis: A Study of the Relationship between Routine Childhood Vaccinations on the Australian Immunisation Schedule and Arthritis Activity in Children with Juvenile Idiopathic Arthritis	International Journal of Rheumatology		1687-9260	10.1155/2020/1078914		Background. Juvenile idiopathic arthritis (JIA) is a collective term for a group of inflammatory conditions of uncertain origin, which causes chronic arthritis in one or more joints. The clinical course of JIA is characterised by episodes of increased activity, termed flares. Vaccinations have previously been proposed as a "trigger" for some flares, although evidence supporting this is scant. Obj…	2020/8/4	2022/9/20 11:25	2022/9/20 11:25		1078914			2020		Int. J. Rheumatol.								English							Place: London Publisher: Hindawi Ltd WOS:000561621500001				methotrexate; safety; efficacy; immunogenicity; measles; influenza vaccine; hpv vaccine; pneumococcal vaccine; case series analysis; rubella vaccination
NULZKTGN	journalArticle	2020	Danchin, Margie; Biezen, Ruby; Manski-Nankervis, Jo-Anne; Kaufman, Jessica; Leask, Julie	Preparing the public for COVID-19 vaccines How can general practitioners build vaccine confidence and optimise uptake for themselves and their patients?	Australian Journal of General Practice		2208-794X			Background The availability of a COVID-19 vaccine is being heralded as the solution to control the current COVID-19 pandemic, reduce the number of infections and deaths and facilitate resumption of our previous way of life. Objective The aim of this article is to provide a framework for primary care of what will be needed to optimise COVID-19 vaccine confidence and uptake in Australia once the va…	20-Oct	2022/9/20 11:25	2022/9/20 11:25		625-629		10	49		Aust. J. Gen. Pract.								English							Place: South Melbourne Publisher: Royal Australian College General Practitioners WOS:000576828500007
G2P36B89	journalArticle	2020	Efendiyeva, Emilya; Kara, Tugce Tural; Erat, Tugba; Yahsi, Aysun; Karbuz, Adem; Kocabas, Bilge Aldemir; Ozdemir, Halil; Karahan, Zeynep Ceren; Ince, Erdal; Ciftci, Ergin	The incidence and clinical effects of Bordetella pertussis in children hospitalized with acute bronchiolitis	Turkish Journal of Pediatrics		0041-4301	10.24953/turkjped.2020.05.003		Background. Pertussis is a disease leading to high morbidity and mortality in neonates and infants. Bronchiolitis is the most common cause of hospitalization especially in children <2 year-old. Although the clinical findings are different in these two diseases, it is sometimes difficult to make this distinction in partially or fully vaccinated children. This study aimed to identify the incidence,…	20-Oct	2022/9/20 11:25	2022/9/20 11:25		726-733		5	62		Turk. J. Pediatr.								English							Place: Ankara Publisher: Turkish J Pediatrics WOS:000582494600002				infection; prevalence; incidence; Bordetella pertussis; infants; acute bronchiolitis; hospitalized children; obliterans
AB4B3Y2K	journalArticle	2020	Bekelis, Kimon; Missios, Symeon; Ahmad, Javaad; Labropoulos, Nicos; Schirmer, Clemens M.; Calnan, Daniel R.; Skinner, Jonathan; MacKenzie, Todd A.	Ischemic Stroke Occurs Less Frequently in Patients With COVID-19 A Multicenter Cross-Sectional Study	Stroke		0039-2499	10.1161/STROKEAHA.120.031217		Background and Purpose: The impact of coronavirus disease 2019 (COVID-19) on the occurrence of ischemic stroke has been the subject of increased speculation but has not been confirmed in large observational studies. We investigated the association between COVID-19 and stroke. Methods: We performed a cross-sectional study involving patients discharged from a healthcare system in New York State, fr…	20-Dec	2022/9/20 11:25	2022/9/20 11:25		3570-3576		12	51		Stroke								English							Place: Philadelphia Publisher: Lippincott Williams & Wilkins WOS:000592045800035				covid-19; risk; infection; influenza vaccination; infections; complications; recommendations; coronavirus disease 2019; heart failure; coronary artery disease; propensity score; reduction
YTAZK8UZ	journalArticle	2020	Bello, Martiniano	Prediction of potential inhibitors of the dimeric SARS-CoV2 main proteinase through the MM/GBSA approach	Journal of Molecular Graphics & Modelling		1093-3263	10.1016/j.jmgm.2020.107762		Since the emergence of SARS-CoV2, to date, no effective antiviral drug has been approved to treat the disease, and no vaccine against SARS-CoV2 is available. Under this scenario, the combination of two HIV-1 protease inhibitors, lopinavir and ritonavir, has attracted attention since they have been previously employed against the SARS-CoV main proteinase (M-pro) and exhibited some signs of effecti…	20-Dec	2022/9/20 11:25	2022/9/20 11:25		107762			101		J. Mol. Graph.								English							Place: New York Publisher: Elsevier Science Inc WOS:000583378100044				SARS-CoV2; coronavirus; dynamics; MD simulations; proteases; simulations; Docking; SARS-CoV; Proteinase
ZDBHC7NH	journalArticle	2020	Kadkhoda, Kamran	COVID-19: an Immunopathological View	Msphere		2379-5042	10.1128/mSphere.00344-20		Since its emergence in December 2019, it took only a couple of months for an outbreak of the novel coronavirus disease 2019 (COVID-19) to be declared a pandemic by the World Health Organization (WHO). This along with the highly infectious nature of the disease and the associated mortality call for particular attention to the underlying (immuno)pathomechanism(s). The latter will inform case manage…	20-Apr	2022/9/20 11:25	2022/9/20 11:25		e00344-20		2	5		mSphere								English							Place: Washington Publisher: Amer Soc Microbiology WOS:000548543100011				covid-19; SARS-CoV-2; coronavirus; children; receptor; immunopathology; c-reactive protein
D9USHF63	journalArticle	2021	Aouidate, Adnane; Ghaleb, Adib; Chtita, Samir; Aarjane, Mohammed; Ousaa, Abdellah; Maghat, Hamid; Sbai, Abdelouahid; Choukrad, M'barek; Bouachrine, Mohammed; Lakhlifi, Tahar	Identification of a novel dual-target scaffold for 3CLpro and RdRp proteins of SARS-CoV-2 using 3D-similarity search, molecular docking, molecular dynamics and ADMET evaluation	Journal of Biomolecular Structure & Dynamics		0739-1102	10.1080/07391102.2020.1779130		The new SARS-CoV-2 coronavirus is the causative agent of the COVID-19 pandemic outbreak that affected whole the world with more than 6 million confirmed cases and over 370,000 deaths. At present, there are no effective treatments or vaccine for this disease, which constitutes a serious global health crisis. As the pandemic still spreading around the globe, it is of interest to use computational m…	2021/8/13	2022/9/20 11:25	2022/9/20 11:25		4522-4535		12	39		J. Biomol. Struct. Dyn.								English							Place: Philadelphia Publisher: Taylor & Francis Inc WOS:000545823800001				covid-19; main protease; molecular docking; polymerase; molecular dynamics; 2019-Novel Coronavirus
LJJ4QCB4	journalArticle	2020	Agrawal, Utkarsh; Katikireddi, Srinivasa Vittal; McCowan, Colin; Mulholland, Rachel H.; Azcoaga-Lorenzo, Amaya; Amele, Sarah; Fagbamigbe, Adeniyi Francis; Vasileiou, Eleftheria; Grange, Zoe; Shi, Ting; Kerr, Steven; Moore, Emily; Murray, Josephine L. K.; Shah, Syed Ahmar; Ritchie, Lewis; O'Reilly, Dermot; Stock, Sarah J.; Beggs, Jillian; Chuter, Antony; Torabi, Fatemah; Akbari, Ashley; Bedston, S…	COVID-19 hospital admissions and deaths after BNT162b2 and ChAdOx1 nCoV-19 vaccinations in 2middot57 million people in Scotland (EAVE II): a prospective cohort study	Lancet Respiratory Medicine		2213-2600	10.1016/S2213-2600(21)00380-5		Background The UK COVID-19 vaccination programme has prioritised vaccination of those at the highest risk of COVID-19 mortality and hospitalisation. The programme was rolled out in Scotland during winter 2020-21, when SARS-CoV-2 infection rates were at their highest since the pandemic started, despite social distancing measures being in place. We aimed to estimate the frequency of COVID-19 hospit…	20-Dec	2022/9/20 11:25	2022/9/20 11:25		1439-1449		12	9		Lancet Resp. Med.								English							Place: Oxford Publisher: Elsevier Sci Ltd WOS:000729806400003				vaccine
YXWCJQ6X	journalArticle	2020	Chakrawarty, Avinash; Ranjan, Piyush; Thrinath, Arnav; Aggarwal, Eishvauk; Isaac, Joshua A.; Berry, Parul; Baitha, Upendra; Upadhyay, Ashish D.; Chowdhury, Souradeep; Kumar, Arvind	Assessment of Preventive Practices Followed by General Public During COVID-19 Pandemic - A Cross-Sectional Survey From India	Cureus			10.7759/cureus.11274		Objectives COVID-19 has infected millions of people across the globe, leading to hundreds of thousands of deaths. Currently, there are no vaccines available for COVID-19, and the most effective way to curb its spread is to follow preventive practices. The present study aimed to assess the extent of adoption of preventive practices among the general population in India. Methods A web-based cross-s…	2020/10/31	2022/9/20 11:25	2022/9/20 11:25		e11274		10	12		Cureus								English							Place: Palo Alto Publisher: Cureus Inc WOS:000583187200005				outbreak; india; covid 19; cross-sectional survey; general population; preventive practices
QXHZQ4P2	journalArticle	2020	Anand, Rajesh; Biswal, Subham; Bhatt, Renu; Tiwary, Bhupendra N.	Computational perspectives revealed prospective vaccine candidates from five structural proteins of novel SARS corona virus 2019 (SARS-CoV-2)	Peerj		2167-8359	10.7717/peerj.9855		Background: The present pandemic COVID-19 is caused by SARS-CoV-2, a single-stranded positive-sense RNA virus from the Coronaviridae family. Due to a lack of antiviral drugs, vaccines against the virus are urgently required. Methods: In this study, validated computational approaches were used to identify peptide-based epitopes from six structural proteins having antigenic properties. The Net-CTL …	2020/9/29	2022/9/20 11:25	2022/9/20 11:25		e9855			8		PeerJ								English							Place: London Publisher: Peerj Inc WOS:000573344900008				covid-19; SARS-CoV-2; receptor; binding; immunogenicity; design; pep-fold; peptide vaccine; epitope prediction; class-i; Computational tools; Peptide epitopes; proteasomal cleavage; tap transport efficiency; Vaccine target
N25YK7IJ	journalArticle	2020	Calligari, Paolo; Bobone, Sara; Ricci, Giorgio; Bocedi, Alessio	Molecular Investigation of SARS-CoV-2 Proteins and Their Interactions with Antiviral Drugs	Viruses-Basel			10.3390/v12040445		A new Coronavirus strain, named SARS-CoV-2, suddenly emerged in early December 2019. SARS-CoV-2 resulted in being dramatically infectious, with thousands of people infected. In this scenario, and without effective vaccines available, the importance of an immediate tool to support patients and against viral diffusion becomes evident. In this study, we exploit the molecular docking approach to anal…	20-Apr	2022/9/20 11:25	2022/9/20 11:25		445		4	12		Viruses-Basel								English							Place: Basel Publisher: Mdpi WOS:000539525300087				covid-19; SARS-CoV-2; coronavirus; spike; binding; spike protein; docking; molecular docking; protease inhibitors; antiviral drug; molecular modeling; RNA-dependent RNA-polymerase; viral protease; viral protein N
Z76ENG72	journalArticle	2020	Calina, Daniela; Hartung, Thomas; Docea, Anca Oana; Spandidos, Demetrios A.; Egorov, Alex M.; Shtilman, Michael; Carvalho, Felix; Tsatsakis, Aristidis	COVID-19 vaccines: ethical framework concerning human challenge studies	Daru-Journal of Pharmaceutical Sciences			10.1007/s40199-020-00371-8		Background The pandemic associated with the new SARS-CoV-2 coronavirus continues to spread worldwide. The most favorable epidemic control scenario, which provides long-term protection against COVID-19 outbreak, is the development and distribution of an effective and safe vaccine. The need to develop a new COVID-19 vaccine is pressing; however, it is likely to take a long time, possibly several ye…	20-Dec	2022/9/20 11:25	2022/9/20 11:25		807-812		2	28		DARU								English							Place: Cham Publisher: Springer International Publishing Ag WOS:000562942300001				COVID-19 vaccines; healthy-volunteers; Human challenge studies; Randomized clinical trials; Risk taking
KWM886KM	journalArticle	2020	Chhetri, Abhijit; Brahman, Dhiraj	Molecular Docking Study of Some Nucleoside Analogs against Main Protease of SARS-CoV-2	Eurasian Journal of Medicine and Oncology			10.14744/ejmo.2020.94995		Objectives: The global pandemic outburst of SARS-CoV-2 in December 2019 infected a large number of people and hasclaimed a significant number of lives. Given the lack of proper therapeutic agents or vaccinefor this pandemic disease, the world is faced with a huge challenge of curingthe infected patients. Therefore, the development of potential therapeutic agents against COVID-19 is a dire need of…	2020	2022/9/20 11:25	2022/9/20 11:25		324-335		4	4		Eurasian J. Med. Oncol.								English							Place: Istanbul Publisher: Kare Publ WOS:000604257100008				covid-19; coronavirus; infections; drugs; derivatives; chloroquine; Binding energy; entecavir; lamivudine; Molecular Docking; nucleoside analog; SARS-CoV-2 protease; stavudine
IGTWQW5L	journalArticle	2020	Debnath, Bimal; Saha, Apu Kr; Bhaumik, Samhita; Debnath, Sudhan	In Silico Identification of Potential Inhibitors of the Main Protease of SARS-CoV-2 Using Combined Ligand-Based and Structure-Based Drug Design Approachc	Eurasian Journal of Medicine and Oncology			10.14744/ejmo.2020.91768		Objectives: The outbreak of coronavirus disease 2019 (COVID-19) caused by the severe acute respiratory syndrome coronavirus 2 (SARS- CoV-2) remains a serious global threat. At the time of writing, there are no specific therapeutic agents or vaccines to combat this disease. This study was designed to identify the SARS-CoV-2 main protease inhibitors using drug molecule information retrieved from Dr…	2020	2022/9/20 11:25	2022/9/20 11:25		336-348		4	4		Eurasian J. Med. Oncol.								English							Place: Istanbul Publisher: Kare Publ WOS:000604257100009				covid-19; SARS-CoV-2; phase; model; sars; perception; proteins; docking; molecular docking; virtual screening; molecular dynamics; glide; cov 3cl protease; DrugBank; pharmacophore
4LYDG3P9	journalArticle	2020	Branch, Andrea D.	How to Survive COVID-19 Even If the Vaccine Fails	Hepatology Communications			10.1002/hep4.1588		Coronavirus disease 2019 (COVID-19) has created an emergency of epic proportions. While a vaccine may be forthcoming, this is not guaranteed, as discussed herein. The potential problems and ominous signs include (1) lung injury that developed in animals given an experimental vaccine for the severe acute respiratory syndrome coronavirus (SARS-CoV)-1; (2) a perversion of adaptive immune responses c…	20-Dec	2022/9/20 11:25	2022/9/20 11:25		1864-1879		12	4		Hepatol. Commun.								English							Place: Chichester Publisher: John Wiley & Sons Ltd WOS:000590804800001				antibody; time; biology; acute respiratory syndrome; coronavirus infection; cell responses
UZZWJSLG	journalArticle	2020	Adhikari, Puja; Li, Neng; Shin, Matthew; Steinmetz, Nicole F.; Twarock, Reidun; Podgornik, Rudolf; Ching, Wai-Yim	Intra- and intermolecular atomic-scale interactions in the receptor binding domain of SARS-CoV-2 spike protein: implication for ACE2 receptor binding	Physical Chemistry Chemical Physics		1463-9076	10.1039/d0cp03145c		The COVID-19 pandemic poses a severe threat to human health with unprecedented social and economic disruption. Spike (S) glycoprotein in the SARS-CoV-2 virus is pivotal in understanding the virus anatomy, since it initiates the early contact with the ACE2 receptor in the human cell. The subunit S1 in chain A of S-protein has four structural domains: the receptor binding domain (RBD), the n-termin…	2020/9/7	2022/9/20 11:25	2022/9/20 11:25		18272-18283		33	22		Phys. Chem. Chem. Phys.								English							Place: Cambridge Publisher: Royal Soc Chemistry WOS:000565157900047				infection; charge-distribution; electronic-structure
I9FGB9KX	journalArticle	2022	Albohy, Amgad; Zahran, Eman Maher; Abdelmohsen, Usama Ramadan; Salem, M. Alaraby; Al-Warhi, Tarfah; Al-Sanea, Mohammad M.; Abelyan, Narek; Khalil, Hany Ezzat; Desoukey, Samar Yehia; Fouad, Mostafa Ahmed; Kamel, Mohamed Salah	Multitarget in silico studies of Ocimum menthiifolium, family Lamiaceae against SARS-CoV-2 supported by molecular dynamics simulation	Journal of Biomolecular Structure & Dynamics		0739-1102	10.1080/07391102.2020.1852964		The novel strain of human coronavirus, emerged in December 2019, which has been designated as SARS-CoV-2, causes a severe acute respiratory syndrome. Since then, it has arisen as a serious threat to the world public health. Since no approved vaccines or drugs has been found to efficiently stop the virulent spread of the virus, progressive inquiries targeting these viruses are urgently needed, esp…	2022/5/23	2022/9/20 11:25	2022/9/20 11:25		4062-4072		9	40		J. Biomol. Struct. Dyn.								English							Place: Philadelphia Publisher: Taylor & Francis Inc WOS:000598599500001				molecular dynamics; molecular docking; flavonoids; covid-2; Ocimum menthiifolium
Q3PWF45R	journalArticle	2020	Henderson, Rory; Edwards, Robert J.; Mansouri, Katayoun; Janowska, Katarzyna; Stalls, Victoria; Gobeil, Sophie M. C.; Kopp, Megan; Li, Dapeng; Parks, Rob; Hsu, Allen L.; Borgnia, Mario J.; Haynes, Barton F.; Acharya, Priyamvada	Controlling the SARS-CoV-2 spike glycoprotein conformation	Nature Structural & Molecular Biology		1545-9993	10.1038/s41594-020-0479-4		The coronavirus (CoV) spike (S) protein, involved in viral-host cell fusion, is the primary immunogenic target for virus neutralization and the current focus of many vaccine design efforts. The highly flexible S-protein, with its mobile domains, presents a moving target to the immune system. Here, to better understand S-protein mobility, we implemented a structure-based vector analysis of availab…	20-Oct	2022/9/20 11:25	2022/9/20 11:25		925-+		10	27		Nat. Struct. Mol. Biol.								English							Place: Berlin Publisher: Nature Portfolio WOS:000551363000001				coronavirus; visualization; immunogenicity; cryo-em structure; design; features; microscopy; env; hiv-1 envelope trimers
LS6Y7TLG	journalArticle	2021	Huang, Ping-Han; Tsai, Hsiao-Han; Liao, Bo-Hung; Lin, Yi-Ling; Jan, Jia-Tsrong; Tao, Mi-Hua; Chou, Yu-Chi; Hu, Che-Ming Jack; Chen, Hui-Wen	Neutralizing antibody response elicited by SARS-CoV-2 receptor-binding domain	Human Vaccines & Immunotherapeutics		2164-5515	10.1080/21645515.2020.1814098		A safe and effective vaccine candidate is urgently needed for the ongoing COVID-19 pandemic, caused by SARS-CoV-2. Here we report that recombinant SARS-CoV-2 RBD protein immunization in mice is able to elicit a strong antibody response and potent neutralizing capability as measured using live or pseudotyped SARS-CoV-2 neutralization assays.	2021/3/4	2022/9/20 11:25	2022/9/20 11:25		654-655		3	17		Human Vaccines Immunother.								English							Place: Philadelphia Publisher: Taylor & Francis Inc WOS:000573652300001				SARS-CoV-2; vaccine; neutralizing antibodies; receptor-binding domain
S3NNWC73	journalArticle	2020	Addetia, Amin; Crawford, Katharine H. D.; Dingens, Adam; Zhu, Haiying; Roychoudhury, Pavitra; Huang, Meei-Li; Jerome, Keith R.; Bloom, Jesse D.; Greninger, Alexander L.	Neutralizing Antibodies Correlate with Protection from SARS-CoV-2 in Humans during a Fishery Vessel Outbreak with a High Attack Rate	Journal of Clinical Microbiology		0095-1137	10.1128/JCM.02107-20		The development of vaccines against SARS-CoV-2 would be greatly facilitated by the identification of immunological correlates of protection in humans. However, to date, studies on protective immunity have been performed only in animal models and correlates of protection have not been established in humans. Here, we describe an outbreak of SARS-CoV-2 on a fishing vessel associated with a high atta…	20-Nov	2022/9/20 11:25	2022/9/20 11:25		e02107-20		11	58		J. Clin. Microbiol.								English							Place: Washington Publisher: Amer Soc Microbiology WOS:000582218400039				covid-19; SARS-CoV-2; neutralizing antibodies; protection; syndrome coronavirus 2; alignment; attack rate; boat; correlates; fishing; vessel
KMSW47DY	journalArticle	2021	Khan, Salman Ali; Zia, Komal; Ashraf, Sajda; Uddin, Reaz; Ul-Haq, Zaheer	Identification of chymotrypsin-like protease inhibitors of SARS-CoV-2viaintegrated computational approach	Journal of Biomolecular Structure & Dynamics		0739-1102	10.1080/07391102.2020.1751298		Recently, the world has witnessed outbreak of a novel Coronavirus (SARS-CoV-2), the virus which initially emerged in Wuhan, China has now made its way to a large part of the world, resulting in a public emergency of international concern. The functional importance of Chymotrypsin-like protease (3CL(pro)) in viral replication and maturation turns it into an attractive target for the development of…	2021/4/9	2022/9/20 11:25	2022/9/20 11:25		2607-2616		7	39		J. Biomol. Struct. Dyn.								English							Place: Philadelphia Publisher: Taylor & Francis Inc WOS:000558846800001				SARS-CoV-2; coronavirus; binding; insights; virtual screening; remdesivir; corona virus; drug repurposing; drug design; 3CL(pro); MD simulation
I3KPAN2J	journalArticle	2020	Awasthi, Mayanka; Gulati, Sahil; Sarkar, Debi P.; Tiwari, Swasti; Kateriya, Suneel; Ranjan, Peeyush; Verma, Santosh Kumar	The Sialoside-Binding Pocket of SARS-CoV-2 Spike Glycoprotein Structurally Resembles MERS-CoV	Viruses-Basel			10.3390/v12090909		COVID-19 novel coronavirus (CoV) disease caused by severe acquired respiratory syndrome (SARS)-CoV-2 manifests severe lethal respiratory illness in humans and has recently developed into a worldwide pandemic. The lack of effective treatment strategy and vaccines against the SARS-CoV-2 poses a threat to human health. An extremely high infection rate and multi-organ secondary infection within a sho…	20-Sep	2022/9/20 11:25	2022/9/20 11:25		909		9	12		Viruses-Basel								English							Place: Basel Publisher: Mdpi WOS:000582024100001				SARS-CoV-2; identification; prediction; coronavirus; ace2; spike glycoprotein; N-terminal domain; MERS-CoV
G9G3XEZP	journalArticle	2020	Li, Entao; Yan, Feihu; Huang, Pei; Chi, Hang; Xu, Shengnan; Li, Guohua; Liu, Chuanyu; Feng, Na; Wang, Hualei; Zhao, Yongkun; Yang, Songtao; Xia, Xianzhu	Characterization of the Immune Response of MERS-CoV Vaccine Candidates Derived from Two Different Vectors in Mice	Viruses-Basel			10.3390/v12010125		Middle East respiratory syndrome (MERS) is an acute, high-mortality-rate, severe infectious disease caused by an emerging MERS coronavirus (MERS-CoV) that causes severe respiratory diseases. The continuous spread and great pandemic potential of MERS-CoV make it necessarily important to develop effective vaccines. We previously demonstrated that the application of Gram-positive enhancer matrix (GE…	20-Jan	2022/9/20 11:25	2022/9/20 11:25		125		1	12		Viruses-Basel								English							Place: Basel Publisher: Mdpi WOS:000515930700104				coronavirus; neutralizing antibodies; immunogenicity; immunization; spike protein; receptor-binding domain; protective immunity; immune response; particles; MERS-CoV; bacterium-like particle; induce; rabies; recombinant rabies virus
HGKNTWNS	journalArticle	2020	Velazquez-Salinas, Lauro; Zarate, Selene; Eberl, Samantha; Gladue, Douglas P.; Novella, Isabel; Borca, Manuel	Positive Selection of ORF1ab, ORF3a, and ORF8 Genes Drives the Early Evolutionary Trends of SARS-CoV-2 During the 2020 COVID-19 Pandemic	Frontiers in Microbiology		1664-302X	10.3389/fmicb.2020.550674		In this study, we analyzed full-length SARS-CoV-2 genomes from multiple countries to determine early trends in the evolutionary dynamics of the novel COVID-19 pandemic. Results indicated SARS-CoV-2 evolved early into at least three phylogenetic groups, characterized by positive selection at specific residues of the accessory proteins ORF3a and ORF8. Also, we are reporting potential relevant sites…	2020/10/23	2022/9/20 11:25	2022/9/20 11:25		550674			11		Front. Microbiol.								English							Place: Lausanne Publisher: Frontiers Media Sa WOS:000585994400001				covid-19; SARS-CoV2; coronavirus; virus; evolution; mutation; virulence; inference; epistasis; network analysis; positive selection; mrbayes
JZ67MNUE	journalArticle	2020	Holm, Anja	New paths for sustainable solutions to tackle global and emerging infectious threats	Biologicals		1045-1056	10.1016/j.biologicals.2020.04.003		With the dramatic background of a newly emerged virus (SARS-CoV-2) spreading around the world, Coronavirus and other infectious health threats for the human and animal populations were illustrated and debated in excellent presentations at the IABS meeting 26-28 of February 2020. Historical evidence of pandemics and lessons learned from recent epidemics or epizootics caused by many pathogens (e.g.…	20-May	2022/9/20 11:25	2022/9/20 11:25		42-45			65		Biologicals								English							Place: London Publisher: Academic Press Ltd- Elsevier Science Ltd WOS:000534255800007
B3S6C4CN	journalArticle	2020	Zeng, Chunxi; Hou, Xucheng; Yan, Jingyue; Zhang, Chengxiang; Li, Wenqing; Zhao, Weiyu; Du, Shi; Dong, Yizhou	Leveraging mRNA Sequences and Nanoparticles to Deliver SARS-CoV-2 Antigens In Vivo	Advanced Materials		0935-9648	10.1002/adma.202004452		SARS-CoV-2 has become a pandemic worldwide; therefore, an effective vaccine is urgently needed. Recently, messenger RNAs (mRNAs) have emerged as a promising platform for vaccination. In this work, the untranslated regions (UTRs) of mRNAs are systematically engineered in order to enhance protein production. Through a comprehensive analysis of endogenous gene expression and de novo design of UTRs, …	20-Oct	2022/9/20 11:25	2022/9/20 11:25		2004452		40	32		Adv. Mater.								English							Place: Weinheim Publisher: Wiley-V C H Verlag Gmbh WOS:000567317300001				SARS-CoV-2; prediction; genes; vaccines; mRNA vaccines; protein; design; translation; stem; untranslated regions; codon; lipid-derived nanoparticles; mRNA engineering; regions
ZVC6M5MZ	journalArticle	2020	Maguire, Cole; Frohman, Teresa; Zamvil, Scott S.; Frohman, Elliot; Melamed, Esther	Should interferons take front stage as an essential MS disease-modifying therapy in the era of coronavirus disease 2019?	Neurology-Neuroimmunology & Neuroinflammation		2332-7812	10.1212/NXI.0000000000000811		In the unprecedented pandemic of the coronavirus disease 2019 (COVID-19) along with a limited clinical understanding on effective vaccines and therapies, there are currently many unknowns for patients with autoimmune conditions, such as MS, who require ongoing treatment with immunotherapies. As information is currently lacking on the immune effects of COVID-19 in the context of MS disease-modifyi…	20-Sep	2022/9/20 11:25	2022/9/20 11:25		e811		5	7		Neurol.-Neuroimmunol. Neuroinflammation								English							Place: Philadelphia Publisher: Lippincott Williams & Wilkins WOS:000571198600014
77IW8JB7	journalArticle	2020	Root-Bernstein, Robert	Possible Cross-Reactivity between SARS-CoV-2 Proteins, CRM197 and Proteins in Pneumococcal Vaccines May Protect Against Symptomatic SARS-CoV-2 Disease and Death	Vaccines			10.3390/vaccines8040559		Various studies indicate that vaccination, especially with pneumococcal vaccines, protects against symptomatic cases of SARS-CoV-2 infection and death. This paper explores the possibility that pneumococcal vaccines in particular, but perhaps other vaccines as well, contain antigens that might be cross-reactive with SARS-CoV-2 antigens. Comparison of the glycosylation structures of SARS-CoV-2 with…	20-Dec	2022/9/20 11:25	2022/9/20 11:25		559		4	8		Vaccines								English							Place: Basel Publisher: Mdpi WOS:000601828300001				covid-19; SARS-CoV-2; vaccination; vaccine; identification; antibodies; cross-reactivity; protection; immunization; immunity; antigens; self; molecular mimicry; bcg; Streptococcus pneumoniae; poliovirus; crm197; similarity; contaminants; diphtheria-tetanus-pertussis; measles-mumps-rubella; meningococcus; pneumococcal; PsaA; pspa; PspA; PspC
SEXXH92N	journalArticle	2020	Hussain, Saddam; Cheema, Muhammad Jehanzeb Masud; Motahhir, Saad; Iqbal, Muhammad Mazhar; Arshad, Arfan; Waqas, Muhammad Sohail; Khalid, Muhammad Usman; Malik, Saba	Proposed Design of Walk-Through Gate (WTG): Mitigating the Effect of COVID-19	Applied System Innovation			10.3390/asi3030041		The world is facing a new challenge to overcome the pandemic disease of Coronavirus (COVID-19). An outbreak of COVID-19 to more than 213 countries and territories caused damage to the economy of every country. The proper vaccine to combat this pandemic disease is not invented yet. Due to the lockdown situation, there is a shortage of daily used products globally. To overcome the issue of food sho…	20-Sep	2022/9/20 11:25	2022/9/20 11:25		41		3	3		Appl. Syst. Innov.								English							Place: Basel Publisher: Mdpi WOS:000697699800013				pandemic; china; disinfectant spray; hot air; sustainable society; walk-through gate
F6JM39AI	journalArticle	2020	Solbach, Werner; Schiffner, Julia; Backhaus, Insa; Burger, David; Staiger, Ralf; Tiemer, Bettina; Bobrowski, Andreas; Hutchings, Timothy; Mischnik, Alexander	Antibody Profiling of COVID-19 Patients in an Urban Low-Incidence Region in Northern Germany	Frontiers in Public Health			10.3389/fpubh.2020.570543		A vast majority of COVID-19 cases present with mild or moderate symptoms. The study region is in an urban and well-defined environment in a low-incidence region in Northern Germany. In the present study, we explored the dynamics of the antibody response with respect to onset, level and duration in patients with confirmed SARS-CoV-2 infection. Anti-SARS-CoV-2 IgG and IgA were detected by automated…	2020/9/22	2022/9/20 11:25	2022/9/20 11:25		570543			8		Front. Public Health								English							Place: Lausanne Publisher: Frontiers Media Sa WOS:000575148700001				covid-19; SARS-CoV-2; seroprevalence; epidemiology; IgG; immunoglobulin; IgA; herd immunity
DE9VKWHB	journalArticle	2020	Noor, Rashed	General awareness on hantavirus infection: A brief review	Biomedical and Biotechnology Research Journal		2588-9834	10.4103/bbrj.bbrj_110_20		Hantavirus is a negative, stranded RNA virus, largely known to be transmitted to humans, especially working in forestry from the rodents. The human-to-human transmission of this virus is still in obscure; however, upon transmission of this virus from the rodent fluids, its fatality is noticed mainly through the hyperinflammatory syndrome and the cardiopulmonary syndrome. Several reports revealed …	20-Dec	2022/9/20 11:25	2022/9/20 11:25		274-279		4	4		Biomed. Biotech. Res. J.								English							Place: Mumbai Publisher: Wolters Kluwer Medknow Publications WOS:000642265000002				mortality; immunity; Hantavirus; hemorrhagic-fever; renal syndrome; rodents
SZTT549E	journalArticle	2020	Guebre-Xabier, Mimi; Patel, Nita; Tian, Jing-Hui; Zhou, Bin; Maciejewski, Sonia; Lam, Kristal; Portnoff, Alyse D.; Massare, Michael J.; Frieman, Matthew B.; Piedra, Pedro A.; Ellingsworth, Larry; Glenn, Gregory; Smith, Gale	NVX-CoV2373 vaccine protects cynomolgus macaque upper and lower airways against SARS-CoV-2 challenge	Vaccine		0264-410X	10.1016/j.vaccine.2020.10.064		There is an urgent need for a safe and protective vaccine to control the global spread of SARS-CoV-2 and prevent COVID-19. Here, we report the immunogenicity and protective efficacy of a SARS-CoV-2 subunit vaccine (NVX-CoV2373) produced from the full-length SARS-CoV-2 spike (S) glycoprotein stabilized in the prefusion conformation. Cynomolgus macaques (Macaca fascicularis) immunized with NVX-CoV2…	2020/11/25	2022/9/20 11:25	2022/9/20 11:25		7892-7896		50	38		Vaccine								English							Place: Oxford Publisher: Elsevier Sci Ltd WOS:000594536100005				covid-19; SARS-CoV-2; Spike glycoprotein; Matrix-M adjuvant; Nonhuman primate; NVX-CoV2373 nanoparticles
6GPUWVY6	journalArticle	2020	Chen, Wen-Hsiang; Hotez, Peter J.; Bottazzi, Maria Elena	Potential for developing a SARS-CoV receptor-binding domain (RBD) recombinant protein as a heterologous human vaccine against coronavirus infectious disease (COVID)-19	Human Vaccines & Immunotherapeutics		2164-5515	10.1080/21645515.2020.1740560		A SARS-CoV receptor-binding domain (RBD) recombinant protein was developed and manufactured under current good manufacturing practices in 2016. The protein, known as RBD219-N1 when formulated on Alhydrogel (R), induced high-level neutralizing antibodies and protective immunity with minimal immunopathology in mice after a homologous virus challenge with SARS-CoV (MA15 strain). We examined publishe…	2020/6/2	2022/9/20 11:25	2022/9/20 11:25		1239-1242		6	16		Human Vaccines Immunother.								English							Place: Philadelphia Publisher: Taylor & Francis Inc WOS:000527167100001				covid-19; SARS-CoV-2; coronavirus; sars; spike protein; receptor-binding domain; subunit vaccine; neutralization; structural basis; human monoclonal-antibody; Heterologous vaccine
XCJ4HYJF	journalArticle	2020	Carreira, Helena; Strongman, Helen; Peppa, Maria; McDonald, Helen; dos-Santos-Silva, Isabel; Stanway, Susannah; Smeeth, Liam; Bhaskaran, Krishnan	Prevalence of COVID-19-related risk factors and risk of severe influenza outcomes in cancer survivors: A matched cohort study using linked English electronic health records data	Eclinicalmedicine			10.1016/j.eclinm.2020.100656		Background: People with active cancer are recognised as at risk of COVID-19 complications, but it is unclear whether the much larger population of cancer survivors is at elevated risk. We aimed to address this by comparing cancer survivors and cancer-free controls for (i) prevalence of comorbidities considered risk factors for COVID-19; and (ii) risk of severe influenza, as a marker of susceptibi…	20-Dec	2022/9/20 11:25	2022/9/20 11:25		100656			29-30		EClinicalMedicine								English							Place: Amsterdam Publisher: Elsevier WOS:000645901100036				vaccination; chemotherapy; mortality
9WXANLD8	journalArticle	2020	Qian, Shen; An, Jianghong; Qi, Furong; Ye, Ling; Chen, Qiong; Liu, Xunqi; Xie, Lixin; Li, Guobao	Tocilizumab exerts anti-inflammatory activity in six critically ill COVID-19 patients: a retrospective analysis	Annals of Translational Medicine		2305-5839	10.21037/atm-20-5080		Background: Coronavirus disease 2019 (COVID-19) has become a worldwide pandemic, affecting countries across the globe. With no current vaccine, treatment is still a critical intervention for minimizing morbidity and preventing disease-specific mortality. This study aimed to assess the clinical outcomes of critically ill COVID-19 patients using Tocilizumab treatment to provide recommendations for …	20-Jul	2022/9/20 11:25	2022/9/20 11:25		881		14	8		ANN. TRANSL. MED.								English							Place: Shatin Publisher: Ame Publ Co WOS:000554494600011				Coronavirus disease 2019 (COVID-19); il-6; Tocilizumab; inflammatory response; interleukin 6 (IL-6)
P56EH6GM	journalArticle	2020	Preskorn, Sheldon H.	Mental Health Care Providers Dealing With Coronavirus Disease 2019 (COVID-19): What Is the Definition of a Case, How Is That Changing, and What Kinds of Tests Are Available?	Journal of Psychiatric Practice		1527-4160	10.1097/PRA.0000000000000473		The goal of this column is to inform mental health care professionals about the evolving way the diagnosis of Coronavirus Disease 2019 (COVID-19) is being made, with emphasis on tests to assist in making the diagnosis and to determine the presence of antibodies to the virus. This column also provides some general information about the disease, its relative risks, and efforts to develop effective …	20-May	2022/9/20 11:25	2022/9/20 11:25		215-218		3	26		J. Psychiatr. Pract.								English							Place: Philadelphia Publisher: Lippincott Williams & Wilkins WOS:000536253600006				vaccines; immunity; tests; Coronavirus Disease 2019 (COVID-19); medications; mental health professionals; real time Reverse Transcriptase (RT)-Polymerase Chain Reaction (PCR) Diagnostics Panel (RT-PCR Panel); treatments
YQSGU69R	journalArticle	2020	Rao, Lang; Xia, Shuai; Xu, Wei; Tian, Rui; Yu, Guocan; Gu, Chenjian; Pan, Pan; Meng, Qian-Fang; Cai, Xia; Qu, Di; Lu, Lu; Xie, Youhua; Jiang, Shibo; Chen, Xiaoyuan	Decoy nanoparticles protect against COVID-19 by concurrently adsorbing viruses and inflammatory cytokines	Proceedings of the National Academy of Sciences of the United States of America		0027-8424	10.1073/pnas.2014352117		The COVID-19 pandemic, caused by severe acute respiratory syndrome coronavirus 2 (SARS-CoV-2), has highlighted the urgent need to rapidly develop therapeutic strategies for such emerging viruses without effective vaccines or drugs. Here, we report a decoy nanoparticle against COVID-19 through a powerful two-step neutralization approach: virus neutralization in the first step followed by cytokine …	2020/11/3	2022/9/20 11:25	2022/9/20 11:25		27141-27147		44	117		Proc. Natl. Acad. Sci. U. S. A.								English							Place: Washington Publisher: Natl Acad Sciences WOS:000587503000018				covid-19; SARS-CoV-2; coronavirus; outbreak; cytokine storm; delivery; zika virus; cell membrane vesicle; nanodecoy
4ZIAGMH7	journalArticle	2020	Aranda-Abreu, Gonzalo Emiliano; Aranda-Martinez, Jose D.; Araujo, Ramiro; Hernandez-Aguilar, Maria Elena; Herrera-Covarrubias, Deissy; Rojas-Duran, Fausto	Observational study of people infected with SARS-Cov-2, treated with amantadine	Pharmacological Reports		1734-1140	10.1007/s43440-020-00168-1		Background We conducted an observational study of 15 patients from a Southeastern area of Mexico with symptoms compatible with SARS-Cov-2, which were treated with the antiviral amantadine. Methodology In this study, data were collected from 15 individuals with clinical symptoms of COVID-19 infection, which were treated on an ambulatory basis with 100 mg of amantadine for a period of 14 days. Resu…	20-Dec	2022/9/20 11:25	2022/9/20 11:25		1538-1541		6	72		Pharmacol. Rep.								English							Place: Heidelberg Publisher: Springer Heidelberg WOS:000581965600001				Amantadine; Azithromycin; Celecoxib; SARS-cov-2
YMLRFR9T	journalArticle	2020	Minihan, E.; Gavin, B.; Kelly, B. D.; McNicholas, F.	COVID-19, mental health and psychological first aid	Irish Journal of Psychological Medicine		0790-9667	10.1017/ipm.2020.41		Crises such as the global pandemic of COVID-19 (coronavirus) elicit a range of responses from individuals and societies adversely affecting physical and emotional well-being. This article provides an overview of factors elicited in response to COVID-19 and their impact on immunity, physical health, mental health and well-being. Certain groups, such as individuals with mental illness, are especial…	20-Dec	2022/9/20 11:25	2022/9/20 11:25		259-263		4	37		Irish J. Psychol. Med.								English							Place: Cambridge Publisher: Cambridge Univ Press WOS:000598786100004				covid-19; pandemic; risk; vaccination; impact; coronavirus; sars; influenza; stress; quarantine; mental health; crisis; psychological first aid
33GEL8RI	journalArticle	2020	Chen, Wangxue	Promise and challenges in the development of COVID-19 vaccines	Human Vaccines & Immunotherapeutics		2164-5515	10.1080/21645515.2020.1787067		The pandemic outbreak of COVID-19, caused by coronavirus SARS-CoV-2, created an unprecedented challenge to global public health system and biomedical community. Vaccination is an effective way to prevent viral infection, stop its transmission, and develop herd immunity. Rapid progress and advances have been made to date in the development of COVID-19 vaccines. Currently, more than 115 vaccine can…	2020/11/1	2022/9/20 11:25	2022/9/20 11:25		2604-2608		11	16		Human Vaccines Immunother.								English							Place: Philadelphia Publisher: Taylor & Francis Inc WOS:000596867600007				covid-19; infection; vaccine; safety; spike; sars-cov-2; animal model; protective immunity; 2019-ncov
KPX9RWIE	journalArticle	2020	Preskorn, Sheldon H.	The 5% of the Population at High Risk for Severe COVID-19 Infection Is Identifiable and Needs to Be Taken Into Account When Reopening the Economy	Journal of Psychiatric Practice		1527-4160	10.1097/PRA.0000000000000475		The goal of this column is to help mental health care professionals understand coronavirus disease 2019 (COVID-19) so that they can better explain the complexities of the current crisis to their patients. The bottom-line of this column is that, while COVID-19 can infect virtually everyone in the human population, only about 5% are susceptible to severe infection requiring admission to an intensiv…	20-May	2022/9/20 11:25	2022/9/20 11:25		219-227		3	26		J. Psychiatr. Pract.								English							Place: Philadelphia Publisher: Lippincott Williams & Wilkins WOS:000536253600007				vaccines; antibodies; immunity; tests; coronavirus disease 2019 (COVID-19); medications; mental health professionals; treatments; risk stratification
MTMG48E8	journalArticle	2020	Tyagi, Ruchita; Gupta, Vivek; Kumar, Rajiv; Wander, G. S.	Traditional Indian practices: Time to revisit and re-adopt for a healthier lifestyle	Journal of Anaesthesiology Clinical Pharmacology		0970-9185	10.4103/joacp.JOACP_299_20		The COVID-19 pandemic has affected human life significantly. In spite of significant advancement of medical technology, management is still focused on preventive strategies due to non availability of vaccine or any definitive treatment. The preventive strategies include hand hygiene, social distancing, isolation/quarantine along with the methods for boosting immunity. The ancient literature and s…	20-Aug	2022/9/20 11:25	2022/9/20 11:25		S166-S171			36		J. Anaesth. Clin. Pharm.								English							Place: Mumbai Publisher: Wolters Kluwer Medknow Publications WOS:000581540400041				covid-19; impact; epidemic; viruses; antioxidant; quarantine; sars coronavirus; inactivation; pulmonary; hand hygiene; isolation; reduce; food habit; herbs and spices; traditional and cultural practices
56RMDEPD	journalArticle	2020	Jia, Jiwei; Ding, Jian; Liu, Siyu; Liao, Guidong; Li, Jingzhi; Duan, Ben; Wang, Guoqing; Zhang, Ran	MODELING THE CONTROL OF COVID-19: IMPACT OF POLICY INTERVENTIONS AND METEOROLOGICAL FACTORS	Electronic Journal of Differential Equations		1072-6691			In this article we propose a dynamical model with seven compartments to describe the transmission of COVID-19 in China. The home quarantine strategy has played a vital role in controlling the disease spread. Based on a Least-Squares procedure and officially published data, the estimation of parameters for the proposed model is obtained. The control reproduction number of most provinces in China a…	2020/3/16	2022/9/20 11:25	2022/9/20 11:25		23					Electron. J. Differ. Equ.								English							Place: San Marcos Publisher: Texas State Univ WOS:000524999200001				covid-19; transmission dynamics; vaccination strategy; dynamical model; isolation strategy; meteorological index
QG3SR43M	journalArticle	2020	Beck, Tyler C.; Beck, Kyle R.; Holloway, Calvin B.; Hemings, Richard A.; Dix, Thomas A.; Norris, Russell A.	The C-C Chemokine Receptor Type 4 Is an Immunomodulatory Target of Hydroxychloroquine	Frontiers in Pharmacology			10.3389/fphar.2020.01253		The emergence of a severe acute respiratory syndrome coronavirus 2 (SARS-CoV-2; COVID-19) in China, reported to the World Health Organization on December 31, 2019, has led to a large global pandemic and is a major public health issue. As a result, there are more than 200 clinical trials of COVID-19 treatments or vaccines that are either ongoing or recruiting patients. One potential therapy that h…	2020/8/28	2022/9/20 11:25	2022/9/20 11:25		1253			11		Front. Pharmacol.								English							Place: Lausanne Publisher: Frontiers Media Sa WOS:000570435100001				covid-19; SARS-CoV-2; therapy; inflammation; protein; t-cells; docking; rheumatoid-arthritis; bacterial; hydroxychloroquine; immunomodulation; chloroquine; ccr4; increased ccr4 expression; tnf-alpha
HB83PUKZ	journalArticle	2020	Wu, Jing; Yu, Wenzhou; Cao, Lei; Cao, Lingsheng; Rodewald, Lance; Ye, Jiakai; Song, Yifan; Li, Li; Liu, Xiaoxue; Wen, Ning; Wang, Fuzhen; Hao, Lixin; Li, Yixing; Zheng, Hui; Li, Keli; Ma, Chao; Wu, Dan; Liu, Yanmin; Zhang, Guomin; An, Zhijie; Wang, Huaqing; Yin, Zundong	Effectiveness of Catch-Up Vaccinations after COVID-19 Containment - China, 2020	China Cdc Weekly			10.46234/ccdcw2020.262		Introduction: In the early stages of the coronavirus disease 2019 (COVID-19) epidemic in China, the highest level of public health emergency response (Level 1 Response) was launched in all province-level administrative divisions (PLADs) across the country. Provision of vaccination services was selectively suspended due to the physical distancing and gathering restrictions required of the Level 1 …	2020/12/11	2022/9/20 11:25	2022/9/20 11:25		968-974		50	2		China CDC Weekly								English							Place: Changping District Publisher: Chinese Center for Disease Control and Prevention WOS:000677709300004
CD7DB6K3	journalArticle	2020	Patel, A.; Charani, E.; Ariyanayagam, D.; Abdulaal, A.; Denny, S. J.; Mughal, N.; Moore, L. S. P.	New-onset anosmia and ageusia in adult patients diagnosed with SARS-CoV-2 infection	Clinical Microbiology and Infection		1198-743X	10.1016/j.cmi.2020.05.026		Objectives: We investigated the prevalence of anosmia and ageusia in adult patients with a laboratory-confirmed diagnosis of infection with severe acute respiratory distress syndrome coronavirus-2 (SARSCoV-2). Methods: This was a retrospective observational analysis of patients infected with SARS-CoV-2 admitted to hospital or managed in the community and their household contacts across a London p…	20-Sep	2022/9/20 11:25	2022/9/20 11:25		1236-1241		9	26		Clin. Microbiol. Infect.								English							Place: Oxford Publisher: Elsevier Sci Ltd WOS:000560393000024				covid-19; SARS-CoV-2; Coronavirus; disorders; Ageusia; Anosmia; Ear nose and throat [MeSH]
NL67U2R9	journalArticle	2020	Antas, M.; Szczotka-Bochniarz, A.; Wozniakowski, G.	Effective inactivation of porcine epidemic diarrhea virus on contaminated surgery masks by low-concentrated sodium hypochlorite dispersion	Polish Journal of Veterinary Sciences		1505-1773	10.24425/pjvs.2020.135801		Coronaviruses present a considerable concern for humans and animals. The current world-wide pandemic of SARS-CoV-2 virus showed many gaps in understanding of coronaviruses spread and transmission. Because of lack of effective vaccine against SARS-CoV-2 the only preventive measures are represented by wearing protective masks and gloves thus limiting potential risk of contact with the airborne viru…	2020	2022/9/20 11:25	2022/9/20 11:25		647-650		4	23		Pol. J. Vet. Sci.								English							Place: Warszawa Publisher: Polska Akad Nauk, Polish Acad Sciences, Univ Warmia & Mazury Olsztyn WOS:000604955100021				pedv; coronaviruses; porcine epidemic diarrhea; disinfectants; dispersion; portable humidifier; SARS-CoV-2 disinfection; sodium hypochlorite; surgery/protective masks
9NUNVC5K	journalArticle	2020	Kabir, K. M. Ariful; Tanimoto, Jun	Evolutionary game theory modelling to represent the behavioural dynamics of economic shutdowns and shield immunity in the COVID-19 pandemic	Royal Society Open Science		2054-5703	10.1098/rsos.201095		The unprecedented global spread of COVID-19 has prompted dramatic public-health measures like strict stay-at-home orders and economic shutdowns. Some governments have resisted such measures in the hope that naturally acquired shield immunity could slow the spread of the virus. In the absence of empirical data about the effectiveness of these measures, policymakers must turn to epidemiological mod…	2020/9/30	2022/9/20 11:25	2022/9/20 11:25		201095		9	7		R. Soc. Open Sci.								English							Place: London Publisher: Royal Soc WOS:000576954500001				vaccination; disease; economic burden; evolutionary game theory; SARS-CoV-19; shield immunity; suppress
RFIG9UZ9	journalArticle	2020	Alosaimi, Bandar; Hamed, Maaweya E.; Naeem, Asif; Alsharef, Ali A.; AlQahtani, Saeed Y.; AlDosari, Kamel M.; Alamri, Aref A.; Al-Eisa, Kholoud; Khojah, Taghreed; Assiri, Abdullah M.; Enani, Mushira A.	MERS-CoV infection is associated with downregulation of genes encoding Th1 and Th2 cytokines/chemokines and elevated inflammatory innate immune response in the lower respiratory tract	Cytokine		1043-4666	10.1016/j.cyto.2019.154895		MERS-CoV, a highly pathogenic virus in humans, is associated with high morbidity and case fatality. Inflammatory responses have a significant impact on MERS-CoV pathogenesis and disease outcome. However, CD4 T-cell induced immune responses during acute MERS-CoV infection are barely detectable, with potent inhibition of effector T cells and downregulation of antigen presentation. The local pulmona…	20-Feb	2022/9/20 11:25	2022/9/20 11:25		154895			126		Cytokine								English							Place: London Publisher: Academic Press Ltd- Elsevier Science Ltd WOS:000509612400027				interferon; disease severity; sars; suppression; cytokines; expression; pathogenesis; syndrome coronavirus; induction; Cytokines; Gene expression; MERS-CoV; Chemokines; immunopathogenesis; Th1/Th2
XH5SXNT9	journalArticle	2020	Narain, Jai Prakash; Dawa, Natasha; Bhatia, Rajesh	Health System Response to COVID-19 and Future Pandemics	Journal of Health Management		0972-0634	10.1177/0972063420935538		The COVID-19 pandemic is a global health and economic crisis of a scale never witnessed before. Beginning in China, it has within a few months devastated many countries around the globe, requiring an unprecedented mobilisation of health systems. While the disease caused by this novel virus is generally mild and self-limiting, the risk of severe disease is disproportionately high among elderly and…	20-Jun	2022/9/20 11:25	2022/9/20 11:25		138-145		2	22		J. Health Manag.								English							Place: New Delhi Publisher: Sage Publications India Pvt Ltd WOS:000559617100001				covid-19; pandemic; public health; health system response
XRXQ76UZ	journalArticle	2020	Toyoshima, Yujiro; Nemoto, Kensaku; Matsumoto, Saki; Nakamura, Yusuke; Kiyotani, Kazuma	SARS-CoV-2 genomic variations associated with mortality rate of COVID-19	Journal of Human Genetics		1434-5161	10.1038/s10038-020-0808-9		The coronavirus disease 2019 (COVID-19) outbreak, caused by SARS-CoV-2, has rapidly expanded to a global pandemic. However, numbers of infected cases, deaths, and mortality rates related to COVID-19 vary from country to country. Although many studies were conducted, the reasons of these differences have not been clarified. In this study, we comprehensively investigated 12,343 SARS-CoV-2 genome se…	20-Dec	2022/9/20 11:25	2022/9/20 11:25		1075-1082		12	65		J. Hum. Genet.								English							Place: London Publisher: Springernature WOS:000551357400002				coronavirus; protein
WBUGDRXB	journalArticle	2020	Tal, Michal Caspi; Dulgeroff, Laughing Bear Torrez; Myers, Lara; Cham, Lamin B.; Mayer-Barber, Katrin D.; Bohrer, Andrea C.; Castro, Ehydel; Yiu, Ying Ying; Angel, Cesar Lopez; Pham, Ed; Carmody, Aaron B.; Messer, Ronald J.; Gars, Eric; Kortmann, Jens; Markovic, Maxim; Hasenkrug, Michaela; Peterson, Karin E.; Winkler, Clayton W.; Woods, Tyson A.; Hansen, Paige; Galloway, Sarah; Wagh, Dhananjay; F…	Upregulation of CD47 Is a Host Checkpoint Response to Pathogen Recognition	Mbio		2150-7511	10.1128/mBio.01293-20		It is well understood that the adaptive immune response to infectious agents includes a modulating suppressive component as well as an activating component. We now show that the very early innate response also has an immunosuppressive component. Infected cells upregulate the CD47 "don't eat me" signal, which slows the phagocytic uptake of dying and viable cells as well as downstream antigen-prese…	20-Jun	2022/9/20 11:25	2022/9/20 11:25		e01293-20		3	11		mBio								English							Place: Washington Publisher: Amer Soc Microbiology WOS:000572051800011				vaccination; cancer; antibodies; cells; activation; macrophages; innate immunity; target; alpha sirp-alpha; cd47; friend virus; host response; immune checkpoint; integrin-associated protein; pathogen recognition receptors
WNTW7MAG	journalArticle	2020	Herst, C.; Burkholz, S.; Sidney, J.; Sette, A.; Harris, P. E.; Massey, S.; Brasel, T.; Cunha-Neto, E.; Rosa, D. S.; Chao, W. C. H.; Carback, R.; Hodge, T.; Wang, L.; Ciotlos, S.; Lloyd, P.; Rubsamen, R.	An effective CTL peptide vaccine for Ebola Zaire Based on Survivors' CD8+targeting of a particular nucleocapsid protein epitope with potential implications for COVID-19 vaccine design	Vaccine		0264-410X	10.1016/j.vaccine.2020.04.034		The 2013-2016 West Africa EBOV epidemic was the biggest EBOV outbreak to date. An analysis of virus-specific CD8+ T-cell immunity in 30 survivors showed that 26 of those individuals had a CD8+ response to at least one EBOV protein. The dominant response (25/26 subjects) was specific to the EBOV nucleocapsid protein (NP). It has been suggested that epitopes on the EBOV NP could form an important p…	2020/6/9	2022/9/20 11:25	2022/9/20 11:25		4464-4475		28	38		Vaccine								English							Place: Oxford Publisher: Elsevier Sci Ltd WOS:000537316500015				covid-19; SARS-CoV-2; identification; receptor; binding; protection; t-cell epitopes; sars coronavirus; macaques; virus infection; neural-networks; Controller; CTL Vaccine; Ebola Zaire vaccine; Flow Focusing; lymphocyte responses; yqvnnleei
RCCA5MPG	journalArticle	2020	Daniell, Henry	From conception to COVID-19: an arduous journey of tribulations of racism and triumphs	Plant Biotechnology Journal		1467-7644	10.1111/pbi.13468		Growing up in a densely wooded tropical forest enhanced my curiosity in plants and reading biography of Marie Curie profoundly influenced pursuit of my research career. Early in my career, I developed in vitro functional chloroplasts, capable of expressing foreign genes and this laid the foundation for the chloroplast genetic engineering field. Four decades of research has advanced chloroplast bi…	20-Nov	2022/9/20 11:25	2022/9/20 11:25		2147-2154		11	18		Plant Biotechnol. J.								English							Place: Hoboken Publisher: Wiley WOS:000571307100001				vaccines; cells; generation; gene; expression; genome; genetic engineering; enzymes; overexpression; biopharmaceuticals; chloroplast; chloroplast genome; oral tolerance induction; protoplasts; tobacco; transformation
7CUS64YA	journalArticle	2020	Tscherning, Charlotte; Sizun, Jacques; Kuhn, Pierre	Promoting attachment between parents and neonates despite the COVID-19 pandemic	Acta Paediatrica		0803-5253	10.1111/apa.15455		Social distancing is the only option available during the COVID-19 pandemic until a vaccine is developed. However, this is having a major impact on human relationships and bonding between parents and neonates is a major concern. Separation during this health emergency could have lifelong consequences for offspring, and there are even greater concerns if newborn infants are sick or vulnerable and …	20-Oct	2022/9/20 11:25	2022/9/20 11:25		1937-1943		10	109		Acta Paediatr.								English							Place: Hoboken Publisher: Wiley WOS:000551335500001				covid-19; pandemic; separation; guidelines; bonding
JTUM2SA9	journalArticle	2020	Cloeckaert, Axel; Kuchler, Karl	Grand Challenges in Infectious Diseases: Are We Prepared for Worst-Case Scenarios?	Frontiers in Microbiology			10.3389/fmicb.2020.613383			2020/11/30	2022/9/20 11:25	2022/9/20 11:25		613383			11		Front. Microbiol.								English							Place: Lausanne Publisher: Frontiers Media Sa WOS:000598129700001				covid-19; mortality; vaccines; infectious diseases; host-pathogen interactions; antimicrobial multidrug resistance; polymicrobial disease; research strategies
ZQDXC5HU	journalArticle	2020	Kalita, Parismita; Padhi, Aditya K.; Zhang, Kam Y. J.; Tripathi, Timir	Design of a peptide-based subunit vaccine against novel coronavirus SARS-CoV-2	Microbial Pathogenesis		0882-4010	10.1016/j.micpath.2020.104236		Coronavirus disease 2019 (COVID-19) is an emerging infectious disease that was first reported in Wuhan, China, and has subsequently spread worldwide. In the absence of any antiviral or immunomodulatory therapies, the disease is spreading at an alarming rate. A possibility of a resurgence of COVID-19 in places where lockdowns have already worked is also developing. Thus, for controlling COVID-19, …	20-Aug	2022/9/20 11:25	2022/9/20 11:25		104236			145		Microb. Pathog.								English							Place: London Publisher: Academic Press Ltd- Elsevier Science Ltd WOS:000540835800026				covid-19; SARS-CoV-2; sars; Subunit vaccine; Peptide vaccine; Adjuvant; Immunogenic epitopes
V23KPKCD	journalArticle	2020	Bauer, Denis C.; Tay, Aidan P.; Wilson, Laurence O. W.; Reti, Daniel; Hosking, Cameron; McAuley, Alexander J.; Pharo, Elizabeth; Todd, Shawn; Stevens, Vicky; Neave, Matthew J.; Tachedjian, Mary; Drew, Trevor W.; Vasan, Seshadri S.	Supporting pandemic response using genomics and bioinformatics: A case study on the emergent SARS-CoV-2 outbreak	Transboundary and Emerging Diseases		1865-1674	10.1111/tbed.13588		Pre-clinical responses to fast-moving infectious disease outbreaks heavily depend on choosing the best isolates for animal models that inform diagnostics, vaccines and treatments. Current approaches are driven by practical considerations (e.g. first available virus isolate) rather than a detailed analysis of the characteristics of the virus strain chosen, which can lead to animal models that are …	20-Jul	2022/9/20 11:25	2022/9/20 11:25		1453-1462		4	67		Transbound. Emerg. Dis.								English							Place: Hoboken Publisher: Wiley WOS:000535069500001				covid-19; evolution; bioinformatics; sars-coronavirus; genomics; viral evolution; alignment-free phylogeny; pheic
J64F8SK4	journalArticle	2020	Liu, Cynthia; Zhou, Qiongqiong; Li, Yingzhu; Garner, Linda; Watkins, Steve P.; Carter, Linda J.; Smoot, Jeffrey; Gregg, Anne C.; Daniels, Angela D.; Jervey, Susan; Albaiu, Dana	Research and Development on Therapeutic Agents and Vaccines for COVID-19 and Related Human Coronavirus Diseases	Acs Central Science		2374-7943	10.1021/acscentsci.0c00272		Since the outbreak of the novel coronavirus disease COVID-19, caused by the SARS-CoV-2 virus, this disease has spread rapidly around the globe. Considering the potential threat of a pandemic, scientists and physicians have been racing to understand this new virus and the pathophysiology of this disease to uncover possible treatment regimens and discover effective therapeutic agents and vaccines. …	2020/3/25	2022/9/20 11:25	2022/9/20 11:25		315-331		3	6		ACS Central Sci.								English							Place: Washington Publisher: Amer Chemical Soc WOS:000521935600002				spike; inhibition; virus; protein; glycoprotein; cov; respiratory syndrome coronavirus
FWBD6LTX	journalArticle	2020	Etxeberria-Etxaniz, Malen; Alonso-Quesada, Santiago; De la Sen, Manuel	On an SEIR Epidemic Model with Vaccination of Newborns and Periodic Impulsive Vaccination with Eventual On-Line Adapted Vaccination Strategies to the Varying Levels of the Susceptible Subpopulation	Applied Sciences-Basel			10.3390/app10228296		This paper investigates a susceptible-exposed-infectious-recovered (SEIR) epidemic model with demography under two vaccination effort strategies. Firstly, the model is investigated under vaccination of newborns, which is fact in a direct action on the recruitment level of the model. Secondly, it is investigated under a periodic impulsive vaccination on the susceptible in the sense that the vaccin…	20-Nov	2022/9/20 11:25	2022/9/20 11:25		8296		22	10		Appl. Sci.-Basel								English							Place: Basel Publisher: Mdpi WOS:000594894800001				COVID-19 pandemic; dynamics; stability; equilibrium points; periodic impulsive vaccination; periodic solutions; SEIR epidemic model; vaccination of newborns
SVYN7HDX	journalArticle	2020	Schultheiss, Christoph; Paschold, Lisa; Simnica, Donjete; Mohme, Malte; Willscher, Edith; von Wenserski, Lisa; Scholz, Rebekka; Wieters, Imke; Dahlke, Christine; Tolosa, Eva; Sedding, Daniel G.; Ciesek, Sandra; Addo, Marylyn; Binder, Mascha	Next-Generation Sequencing of T and B Cell Receptor Repertoires from COVID-19 Patients Showed Signatures Associated with Severity of Disease	Immunity		1074-7613	10.1016/j.immuni.2020.06.024		We profiled adaptive immunity in COVID-19 patients with active infection or after recovery and created a repository of currently >14 million B and T cell receptor (BCR and TCR) sequences from the blood of these patients. The B cell response showed converging IGHV3-driven BCR clusters closely associated with SARS-CoV-2 antibodies. Clonality and skewing of TCR repertoires were associated with inter…	2020/8/18	2022/9/20 11:25	2022/9/20 11:25		442-+		2	53		Immunity								English							Place: Cambridge Publisher: Cell Press WOS:000561190600020				coronavirus; antibodies; pneumonia; system; heterogeneity; expression
AKW628WD	journalArticle	2020	Yu, Yuetian; Li, Yujie; Zhang, Zhongheng; Gu, Zhichun; Zhong, Han; Zha, Qiongfang; Yang, Luyu; Zhu, Cheng; Chen, Erzhen	A bibliometric analysis using VOSviewer of publications on COVID-19	Annals of Translational Medicine		2305-5839	10.21037/atm-20-4235		Background: As a global pandemic, COVID-19 has aroused great concern in the last few months and a growing number of related researches have been published. Therefore, a bibliometric analysis of these publications may provide a direction of hot topics and future research trends. Methods: The global literatures about COVID-19 published between 2019 and 2020 were scanned in the Web of Science collec…	20-Jul	2022/9/20 11:25	2022/9/20 11:25		816		13	8		ANN. TRANSL. MED.								English							Place: Shatin Publisher: Ame Publ Co WOS:000550036800009				SARS-CoV-2; trends; Bibliometric analysis; coronavirus disease 2019 (COVID-19); novel coronavirus
TVGWL7W7	journalArticle	2020	Lau, Siu-Ying; Wang, Pui; Mok, Bobo Wing-Yee; Zhang, Anna Jinxia; Chu, Hin; Lee, Andrew Chak-Yiu; Deng, Shaofeng; Chen, Pin; Chan, Kwok-Hung; Song, Wenjun; Chen, Zhiwei; To, Kelvin Kai-Wang; Chan, Jasper Fuk-Woo; Yuen, Kwok-Yung; Chen, Honglin	Attenuated SARS-CoV-2 variants with deletions at the S1/S2 junction	Emerging Microbes & Infections			10.1080/22221751.2020.1756700		The emergence of SARS-CoV-2 has led to the current global coronavirus pandemic and more than one million infections since December 2019. The exact origin of SARS-CoV-2 remains elusive, but the presence of a distinct motif in the S1/S2 junction region suggests the possible acquisition of cleavage site(s) in the spike protein that promoted cross-species transmission. Through plaque purification of …	2020/1/1	2022/9/20 11:25	2022/9/20 11:25		837-842		1	9		Emerg. Microbes Infect.								English							Place: Abingdon Publisher: Taylor & Francis Ltd WOS:000533625600001				covid-19; SARS-CoV-2; Coronavirus; coronavirus; S2 mutant; Spike mutant; Spike S1
AIDBTG33	journalArticle	2020	McAuley, Alexander J.; Kuiper, Michael J.; Durr, Peter A.; Bruce, Matthew P.; Barr, Jennifer; Todd, Shawn; Au, Gough G.; Blasdell, Kim; Tachedjian, Mary; Lowther, Sue; Marsh, Glenn A.; Edwards, Sarah; Poole, Timothy; Layton, Rachel; Riddell, Sarah-Jane; Drew, Trevor W.; Druce, Julian D.; Smith, Trevor R. F.; Broderick, Kate E.; Vasan, S. S.	Experimental and in silico evidence suggests vaccines are unlikely to be affected by D614G mutation in SARS-CoV-2 spike protein	Npj Vaccines			10.1038/s41541-020-00246-8		The 'D614G' mutation (Aspartate-to-Glycine change at position 614) of the SARS-CoV-2 spike protein has been speculated to adversely affect the efficacy of most vaccines and countermeasures that target this glycoprotein, necessitating frequent vaccine matching. Virus neutralisation assays were performed using sera from ferrets which received two doses of the INO-4800 COVID-19 vaccine, and Australi…	2020/10/8	2022/9/20 11:25	2022/9/20 11:25		96		1	5		npj Vaccines								English							Place: Berlin Publisher: Nature Portfolio WOS:000581670500001
KWC2UHNZ	journalArticle	2020	Shereen, Muhammad Adnan; Khan, Suliman; Kazmi, Abeer; Bashir, Nadia; Siddique, Rabeea	COVID-19 infection: Origin, transmission, and characteristics of human coronaviruses	Journal of Advanced Research		2090-1232	10.1016/j.jare.2020.03.005		The coronavirus disease 19 (COVID-19) is a highly transmittable and pathogenic viral infection caused by severe acute respiratory syndrome coronavirus 2 (SARS-CoV-2), which emerged in Wuhan, China and spread around the world. Genomic analysis revealed that SARS-CoV-2 is phylogenetically related to severe acute respiratory syndrome-like (SARS-like) bat viruses, therefore bats could be the possible…	20-Jul	2022/9/20 11:25	2022/9/20 11:25		91-98			24		J. Adv. Res.								English							Place: Amsterdam Publisher: Elsevier WOS:000550188100008				covid-19; vaccine; Outbreak; virus; immunization; acute respiratory syndrome; spike protein; cov; protective immunity; sars coronavirus; functional receptor; Coronaviruses; dipeptidyl peptidase 4; Origin; Spread
VIE4ZGZH	journalArticle	2020	Haider, Imran Ijaz; Tiwana, Farah; Tahir, Sania Mumtaz	Impact of the COVID-19 Pandemic on Adult Mental Health	Pakistan Journal of Medical Sciences		1682-024X	10.12669/pjms.36.COVID19-S4.2756		The outbreak of the Novel Coronavirus (COVID-19) in December 2019 has progressed to the status of a global pandemic, with countries across the seven continents adversely affected and the number of human cases exceeding two million. With no available vaccine, the treatment is primarily symptomatic for those affected and preventative for those at risk. Most countries have taken action to curtail th…	20-May	2022/9/20 11:25	2022/9/20 11:25		S90-S94		4	36		Pak. J. Med. Sci.								English							Place: Saddar Publisher: Professional Medical Publications WOS:000554459400018				covid-19; sars; influenza; resilience; stress; hong-kong; Mental Health; Pandemic Impact
SUSRTV27	journalArticle	2021	Yamaki, Jason; Peled, Harry; Mathews, Sajen; Park, David; Firoozi, Mina; Smith, Kim; Nguyen, Lee	Seroprevalence of Novel Coronavirus SARS-CoV-2 at a Community Hospital Emergency Department and Outpatient Laboratory in Northern Orange County, California	Journal of Racial and Ethnic Health Disparities		2197-3792	10.1007/s40615-020-00918-0		Introduction The severe acute respiratory syndrome related coronavirus 2 (SARS-CoV-2) has infected more than 20 million people worldwide, and the spread is most prevalent in the USA, where California had accounted over 240,000 cases in the initial 5 months of the pandemic. To estimate the number of infected persons in our community, we conducted a cross-sectional study to estimate seroprevalence …	21-Dec	2022/9/20 11:25	2022/9/20 11:25		1551-1555		6	8		J. Racial Ethn. Health Disparities								English							Place: Cham Publisher: Springer Int Publ Ag WOS:000592100500001				covid-19; SARS-CoV-2; Immunoglobulin G
HQJCNXD2	journalArticle	2020	Brown, Cortlyn; Noble, Jeanne; Coralic, Zlatan	Brief Summary of Potential SARS-CoV-2 Prophylactic and Treatment Drugs in the Emergency Department	Western Journal of Emergency Medicine		1936-900X	10.5811/westjem.2020.3.47328		As of March 30th, 2020 there were 161,807 total cases and 2,953 total deaths of SARS-CoV-2 in the United States, with the number of cases expected to rise. Other than supportive care, there are no SARS-CoV-2 specific treatments available for patients discharged from the emergency department (ED) or those admitted to the hospital. In addition, there are no vaccines available to protect our at-risk…	20-May	2022/9/20 11:25	2022/9/20 11:25		510-513		3	21		West. J. Emerg. Med.								English							Place: Orange Publisher: Westjem WOS:000551766000010
27CH43DT	journalArticle	2020	Sposato, Bruno; Scalese, Marco	Why do children seem to be more protected against COVID-19? A hypothesis	Medical Hypotheses		0306-9877	10.1016/j.mehy.2020.110151		Today it remains unclear why children seem to be less likely to get infected by COVID-19 or why they appear to be less symptomatic after infections. All individuals, especially children, are exposed to various viruses including human coronavirus (CoVs) that can generally lead to respiratory infections. We hypothesize that recurrent CoVs exposure may induce an effective antiviral B and T-cell-medi…	20-Oct	2022/9/20 11:25	2022/9/20 11:25		110151			143		Med. Hypotheses								English							Place: Edinburgh Publisher: Churchill Livingstone WOS:000577511800053				covid-19; Coronavirus; coronavirus; Children; receptor; protein; ace2; Infection
VPXTFDDF	journalArticle	2021	Al-Shar'i, Nizar A.	Tackling COVID-19: identification of potential main protease inhibitors via structural analysis, virtual screening, molecular docking and MM-PBSA calculations	Journal of Biomolecular Structure & Dynamics		0739-1102	10.1080/07391102.2020.1800514		The widespread of the COVID-19 disease, caused by the novel severe acute respiratory syndrome coronavirus (SARS-CoV-2), had severely affected the entire world. Unfortunately, no successful vaccines or antiviral drugs are currently available which leaves the scientific community under huge pressure to tackle this pandemic. Among the identified promising druggable targets, specific to this virus, i…	2021/11/22	2022/9/20 11:25	2022/9/20 11:25		6689-6704		17	39		J. Biomol. Struct. Dyn.								English							Place: Philadelphia Publisher: Taylor & Francis Inc WOS:000555217100001				covid-19; dynamics; docking; main protease; amber; key interacting residues; pharmacophore modeling
WFSPUATS	journalArticle	2020	Akachar, Jihane; Bouricha, El Mehdi; Hakmi, Mohammed; Belyamani, Lahcen; El Jaoudi, Rachid; Ibrahimi, Azeddine	Identifying epitopes for cluster of differentiation and design of new peptides inhibitors against human SARS-CoV-2 spike RBD by an in-silico approach	Heliyon		2405-8440	10.1016/j.heliyon.2020.e05739		The coronavirus disease 19 (COVID-19) is a highly contagious and rapidly spreading infection caused by the severe acute respiratory syndrome coronavirus 2 (SARS-CoV-2). In some cases, the disease can be fatal which resulted in more than one million deaths worldwide according the WHO. Currently, there is no effective vaccine or treatment for COVID-19, however many small-molecule inhibitors have sh…	20-Dec	2022/9/20 11:25	2022/9/20 11:25		e05739		12	6		Heliyon								English							Place: Oxford Publisher: Elsevier Sci Ltd WOS:000623242400017				Molecular docking; Spike protein; Molecular dynamics; Biological sciences; Chemistry; Cluster of differentiation; Computer science; Coronavirus 19; Engineering; Peptide-based drugs; Physics
3L2V7XIU	journalArticle	2020	Galson, Jacob D.; Schaetzle, Sebastian; Bashford-Rogers, Rachael J. M.; Raybould, Matthew I. J.; Kovaltsuk, Aleksandr; Kilpatrick, Gavin J.; Minter, Ralph; Finch, Donna K.; Dias, Jorge; James, Louisa K.; Thomas, Gavin; Lee, Wing-Yiu Jason; Betley, Jason; Cavlan, Olivia; Leech, Alex; Deane, Charlotte M.; Seoane, Joan; Caldas, Carlos; Pennington, Daniel J.; Pfeffer, Paul; Osbourn, Jane	Deep Sequencing of B Cell Receptor Repertoires From COVID-19 Patients Reveals Strong Convergent Immune Signatures	Frontiers in Immunology		1664-3224	10.3389/fimmu.2020.605170		Deep sequencing of B cell receptor (BCR) heavy chains from a cohort of 31 COVID-19 patients from the UK reveals a stereotypical naive immune response to SARS-CoV-2 which is consistent across patients. Clonal expansion of the B cell population is also observed and may be the result of memory bystander effects. There was a strong convergent sequence signature across patients, and we identified 1,25…	2020/12/15	2022/9/20 11:25	2022/9/20 11:25		605170			11		Front. Immunol.								English							Place: Lausanne Publisher: Frontiers Media Sa WOS:000603023500001				covid-19; SARS-CoV-2; infection; coronavirus; antibody; monoclonal-antibody; immunoglobulin; toolkit; B-cell repertoire; bcr; ade; convergence; gene segment
B9YDTP3D	journalArticle	2021	Unger, Jean-Pierre	Comparison of COVID-19 Health Risks With Other Viral Occupational Hazards	International Journal of Health Services		0020-7314	10.1177/0020731420946590		The European Commission periodically classifies viruses on their occupational hazards to define the level of protection that workers are entitled to claim. Viruses belonging to Groups 3 and 4 can cause severe human disease and hazard to workers, as well as a spreading risk to the community. However, there is no effective prophylaxis or treatment available for Group 4 viruses. European trade union…	21-Jan	2022/9/20 11:25	2022/9/20 11:25		37-49		1	51		Int. J. Health Serv.								English							Place: London Publisher: Sage Publications Ltd WOS:000558800000001				covid-19; epidemiology; virus; hepatitis; occupational health; burden of disease; case-fatality
BM4RJ7VQ	journalArticle	2020	De Giorgi, A.; Fabbian, F.; Di Simone, E.; Greco, S.; De Giorgio, R.; Zuliani, G.; Passaro, A.; Caselli, E.; Manfredini, R.	Morning vs. evening administration of ntiviral therapy in COVID-19 patients. A preliminary retrospective study in Ferrara, Italy	European Review for Medical and Pharmacological Sciences		1128-3602	10.26355/eurrev_202008_22511		OBJECTIVE: At the end of 2019, the Novel Severe Acute Respiratory Syndrome Coronavirus-2 (SARS-CoV-2), spread rapidly from China to the whole world. Circadian rhythms can play crucial role in the complex interplay between viruses and organisms, and temporized schedules (chronotherapy) have been positively tested in several medical diseases. We aimed to compare the possible effects of a morning vs…	2020	2022/9/20 11:25	2022/9/20 11:25		8219-8225		15	24		Eur. Rev. Med. Pharmacol. Sci.								English							Place: Rome Publisher: Verduci Publisher WOS:000557394400038				infection; vaccination; Hospitalization; innate; Inflammation; Antiviral drugs; Outcome; Severe Acute Respiratory Syndrome Coronavirus 2 (SARS-CoV-2); clock; lopinavir/ritonavir; Ritonavir; C-reactive protein; Chronobiology; Chronotherapy; circadian-rhythms; Darunavir
SB2I6JLY	journalArticle	2020	Baay, Marc; Lina, Bruno; Fontanet, Arnaud; Marchant, Arnaud; Saville, Melanie; Sabot, Philippe; Duclos, Philippe; Vandeputte, Joris; Neels, Pieter	SARS-CoV-2: Virology, epidemiology, immunology and vaccine development	Biologicals		1045-1056	10.1016/j.biologicals.2020.06.005		This first International Alliance for Biological Standardization Covid-19 webinar brought together a broad range of international stakeholders, including academia, regulators, funders and industry, with a considerable delegation from low- and middle-income countries, to discuss the virology, epidemiology and immunology of, and the vaccine development for SARS-CoV-2.	20-Jul	2022/9/20 11:25	2022/9/20 11:25		35-40			66		Biologicals								English							Place: London Publisher: Academic Press Ltd- Elsevier Science Ltd WOS:000551631600006				SARS-CoV-2; Epidemiology; Immunology; wave; Vaccine development; Virology
HWY48P5T	journalArticle	2020	Kousar, Kafila; Majeed, Arshia; Yasmin, Farkhanda; Hussain, Waqar; Rasool, Nouman	Phytochemicals from Selective Plants Have Promising Potential against SARS-CoV-2: Investigation and Corroboration through Molecular Docking, MD Simulations, and Quantum Computations	Biomed Research International		2314-6133	10.1155/2020/6237160		Coronaviruses have been reported previously due to their association with the severe acute respiratory syndrome (SARS). After SARS, these viruses were known to be causing Middle East respiratory syndrome (MERS) and caused 35% evanescence amid victims pursuing remedial care. Nowadays, beta coronaviruses, members of Coronaviridae, family order Nidovirales, have become subjects of great importance d…	2020/10/13	2022/9/20 11:25	2022/9/20 11:25		6237160			2020		Biomed Res. Int.								English							Place: London Publisher: Hindawi Ltd WOS:000588322800006				rna; coronavirus; antibodies; sars; inhibitors; dna; database; helicase; 229e; qsar
IABGVZ2Y	journalArticle	2020	Sharma, Nilesh Kumar; Sarode, Sachin C.; Sarode, Gargi; Patil, Shankargouda	Is a COVID-19 vaccine developed by nature already at work?	Medical Hypotheses		0306-9877	10.1016/j.mehy.2020.110335		The COVID-19 positive cases are increasing at an alarming rate across the world. On the contrary, the morbidity and mortality are showing decreasing trend as time progresses. The most intriguing part is the rise in asymptomatic Severe Acute Respiratory Syndrome Corona Virus 2 (SARS-CoV-2) positive cases in the population, which made us speculate some kind of gradual development of immunity in the…	20-Dec	2022/9/20 11:25	2022/9/20 11:25		110335			145		Med. Hypotheses								English							Place: Edinburgh Publisher: Churchill Livingstone WOS:000597282700015				covid-19; SARS-CoV-2; Coronavirus; Immunity; Vaccine; stability
VF85XYXL	journalArticle	2020	Tsay, Calvin; Lejarza, Fernando; Stadtherr, Mark A.; Baldea, Michael	Modeling, state estimation, and optimal control for the US COVID-19 outbreak	Scientific Reports		2045-2322	10.1038/s41598-020-67459-8		The novel coronavirus SARS-CoV-2 and resulting COVID-19 disease have had an unprecedented spread and continue to cause an increasing number of fatalities worldwide. While vaccines are still under development, social distancing, extensive testing, and quarantining of confirmed infected subjects remain the most effective measures to contain the pandemic. These measures carry a significant socioecon…	2020/7/1	2022/9/20 11:25	2022/9/20 11:25		10711		1	10		Sci Rep								English							Place: Berlin Publisher: Nature Portfolio WOS:000546550700025
33YL8C4R	journalArticle	2020	Garofalo, Mariangela; Staniszewska, Monika; Salmaso, Stefano; Caliceti, Paolo; Pancer, Katarzyna Wanda; Wieczorek, Magdalena; Kuryk, Lukasz	Prospects of Replication-Deficient Adenovirus Based Vaccine Development against SARS-CoV-2	Vaccines			10.3390/vaccines8020293		The current appearance of the new SARS coronavirus 2 (SARS-CoV-2) and it quickly spreading across the world poses a global health emergency. The serious outbreak position is affecting people worldwide and requires rapid measures to be taken by healthcare systems and governments. Vaccinations represent the most effective strategy to prevent the epidemic of the virus and to further reduce morbidity…	20-Jun	2022/9/20 11:25	2022/9/20 11:25		293		2	8		Vaccines								English							Place: Basel Publisher: Mdpi WOS:000553893000001				covid-19; SARS-CoV-2; vaccine; disease; receptor; efficacy; adjuvant; immune-responses; immunogenicity; immunization; adjuvants; innate immunity; vectors; adenovirus; gene-therapy
UG85HPID	journalArticle	2020	Abid, Muhammad Abbas; Nunley, Loren; Abid, Muhammad Bilal	Could Coronavirus Disease 2019 (COVID-19) Render Natural Immunity to Re-infections? A Spotlight on the Therapeutic Pipeline	Frontiers in Immunology		1664-3224	10.3389/fimmu.2020.01294			2020/6/5	2022/9/20 11:25	2022/9/20 11:25		1294			11		Front. Immunol.								English							Place: Lausanne Publisher: Frontiers Media Sa WOS:000543173300001				covid-19; antibodies; cells; acute respiratory syndrome; convalescent plasma; vaccine development; adaptive immunity; antibody-dependent enhancement (ADE)
LFR3672D	journalArticle	2020	Sut, Burcu Biterge	Molecular profiling of immune cell-enriched Severe Acute Respiratory Syndrome Coronavirus 2 (SARS-CoV-2) interacting protein USP13	Life Sciences		0024-3205	10.1016/j.lfs.2020.118170		Aims: Coronavirus disease 2019 (COVID-19), which is caused by Severe Acute Respiratory Syndrome Coronavirus 2 (SARS-CoV-2), is a major health concern worldwide. Due to the lack of specific medication and vaccination, drug-repurposing attempts has emerged as a promising approach and identified several human proteins interacting with the virus. This study aims to provide a comprehensive molecular p…	2020/10/1	2022/9/20 11:25	2022/9/20 11:25		118170			258		Life Sci.								English							Place: Oxford Publisher: Pergamon-Elsevier Science Ltd WOS:000575169900011				covid-19; Coronavirus; cancer; pathway; ligases; SARS-CoV-2 interacting proteins; targets; Ubiquitin Specific Peptidase 13; usp13
DDH4HELW	journalArticle	2021	Aronson, Jeffrey K.; Auker-Howlett, Daniel; Ghiara, Virginia; Kelly, Michael P.; Williamson, Jon	The use of mechanistic reasoning in assessing coronavirus interventions	Journal of Evaluation in Clinical Practice		1356-1294	10.1111/jep.13438		Rationale Evidence-based medicine (EBM), the dominant approach to assessing the effectiveness of clinical and public health interventions, focuses on the results of association studies. EBM+ is a development of EBM that systematically considers mechanistic studies alongside association studies. Aims and objectives To explore examples of the importance of mechanistic evidence to coronavirus resear…	21-Jun	2022/9/20 11:25	2022/9/20 11:25		684-693		3	27		J. Eval. Clin. Pract.								English							Place: Hoboken Publisher: Wiley WOS:000548413500001				infection; vaccine; coronavirus; mechanisms; replication; protease; respiratory syndrome coronavirus; mycophenolic-acid; models; evidence-based medicine; interferon-beta; mechanistic reasoning; ribavirin; synergistically inhibit
TMIQ6LKD	journalArticle	2021	McMahan, Katherine; Yu, Jingyou; Mercado, Noe B.; Loos, Carolin; Tostanoski, Lisa H.; Chandrashekar, Abishek; Liu, Jinyan; Peter, Lauren; Atyeo, Caroline; Zhu, Alex; Bondzie, Esther A.; Dagotto, Gabriel; Gebre, Makda S.; Jacob-Dolan, Catherine; Li, Zhenfeng; Nampanya, Felix; Patel, Shivani; Pessaint, Laurent; Van Ry, Alex; Blade, Kelvin; Yalley-Ogunro, Jake; Cabus, Mehtap; Brown, Renita; Cook, An…	Correlates of protection against SARS-CoV-2 in rhesus macaques	Nature		0028-0836	10.1038/s41586-020-03041-6		Adoptive transfer of purified IgG from convalescent macaques protects naive macaques against SARS-CoV-2 infection, and cellular immune responses contribute to protection against rechallenge with SARS-CoV-2. Recent studies have reported the protective efficacy of both natural(1) and vaccine-induced(2-7) immunity against challenge with severe acute respiratory syndrome coronavirus 2 (SARS-CoV-2) in…	2021/2/25	2022/9/20 11:25	2022/9/20 11:25				7847	590		Nature								English							Place: Berlin Publisher: Nature Portfolio WOS:000607491900001				immunity
5N5VLSK6	journalArticle	2020	Rahmadani, Firda; Lee, Hyunsoo	Hybrid Deep Learning-Based Epidemic Prediction Framework of COVID-19: South Korea Case	Applied Sciences-Basel			10.3390/app10238539		Featured Application The proposed framework is the hybrid deep learning framework using the meta-population model and LSTM. It is expected to contribute to the effective control of COVID-19 infection. The emergence of COVID-19 and the pandemic have changed and devastated every aspect of our lives. Before effective vaccines are widely used, it is important to predict the epidemic patterns of COVID…	20-Dec	2022/9/20 11:25	2022/9/20 11:25		8539		23	10		Appl. Sci.-Basel								English							Place: Basel Publisher: Mdpi WOS:000597737300001				covid-19; spread; human mobility; epidemic modeling; human mobility restrictions; hybrid deep learning; meta-population model
K79VCY3M	journalArticle	2020	Liu, Baoning; Liu, Siyu; Zhang, Siyuan; Bai, Liang; Liu, Enqi	Bioinformatic evaluation of the potential animal models for studying SARS-Cov-2	Heliyon		2405-8440	10.1016/j.heliyon.2020.e05725		Recently, the severe acute respiratory syndrome coronavirus 2 (SARS-Cov-2), a novel coronavirus, which results in corona virus disease 2019 (COVID-19), has caused over 40 millions of people infected and over 1 million fatalities, challenging the public health. The recognition of its functional receptor, angiotensin converting enzyme 2 (ACE2), have facilitated the antivirus drugs testing and vacci…	20-Dec	2022/9/20 11:25	2022/9/20 11:25		e05725		12	6		Heliyon								English							Place: Oxford Publisher: Elsevier Sci Ltd WOS:000623242400005				SARS-CoV-2; Covid-19; ace2; Bioinformatics; Genetics; Virology; Crab-eating monkey; Microbiology; Molecular biology
JIC8UZHM	journalArticle	2020	Shanmugaraj, Balamurugan; Rattanapisit, Kaewta; Manopwisedjaroen, Suwimon; Thitithanyanont, Arunee; Phoolcharoen, Waranyoo	Monoclonal Antibodies B38 and H4 Produced in Nicotiana benthamiana Neutralize SARS-CoV-2 in vitro	Frontiers in Plant Science		1664-462X	10.3389/fpls.2020.589995		The ongoing coronavirus disease 2019 (COVID-19) outbreak caused by novel zoonotic severe acute respiratory syndrome coronavirus 2 (SARS-CoV-2) was initially reported in Wuhan city, Hubei Province of China, in late December 2019. The rapid global spread of the virus calls for the urgent development of vaccines or therapeutics for human applications to combat the coronavirus infection. Monoclonal a…	2020/11/27	2022/9/20 11:25	2022/9/20 11:25		589995			11		Front. Plant Sci.								English							Place: Lausanne Publisher: Frontiers Media Sa WOS:000597298800001				covid-19; SARS-CoV-2; infection; vaccines; virus; glycosylation; expression; molecular farming; plants; potent; combination; sars coronavirus; agrobacterium; Nicotiana benthamiana; plant recombinant proteins; plant-produced monoclonal antibody; transient expression
8JLRXZ62	journalArticle	2020	Aksu, K.; Naziroglu, T.; Ozkan, P.	Factors determining COVID-19 pneumonia severity in a country with routine BCG vaccination	Clinical and Experimental Immunology		0009-9104	10.1111/cei.13507		Background The impact of countries' bacillus Calmette-Guerin (BCG) vaccination policies on the course of coronavirus disease (COVID-19) outbreak is a curiosity. In this study, the relationship between BCG vaccination status and severity of COVID-19 pneumonia and the factors affecting disease severity were investigated. Methods A retrospective cross-sectional study was conducted between March and …	20-Nov	2022/9/20 11:25	2022/9/20 11:25		220-225		2	202		Clin. Exp. Immunol.								English							Place: Oxford Publisher: Oxford Univ Press WOS:000569847300001				covid-19; SARS-CoV-2; severity; adults; hypertension; income; smoking; diabetes mellitus; bacillus Calmette-Guerin; clinical-outcomes
X6I526UH	journalArticle	2021	Zhang, Jian; Wu, Qian; Liu, Ziyan; Wang, Qijie; Wu, Jiajing; Hu, Yabin; Bai, Tingting; Xie, Ting; Huang, Mincheng; Wu, Tiantian; Peng, Danhong; Huang, Weijin; Jin, Kun; Niu, Ling; Guo, Wangyuan; Luo, Dixian; Lei, Dongzhu; Wu, Zhijian; Li, Guicheng; Huang, Renbin; Lin, Yingbiao; Xie, Xiangping; He, Shuangyan; Deng, Yunfan; Liu, Jianghua; Li, Weilang; Lu, Zhongyi; Chen, Haifu; Zeng, Ting; Luo, Qing…	Spike-specific circulating T follicular helper cell and cross-neutralizing antibody responses in COVID-19-convalescent individuals	Nature Microbiology		2058-5276	10.1038/s41564-020-00824-5		Coronavirus disease 2019 (COVID-19) is caused by infection with severe acute respiratory syndrome coronavirus 2 (SARS-CoV-2)(1-3) and individuals with COVID-19 have symptoms that can be asymptomatic, mild, moderate or severe(4,5). In the early phase of infection, T- and B-cell counts are substantially decreased(6,7); however, IgM(8-11) and IgG(12-14) are detectable within 14 d after symptom onset…	21-Jan	2022/9/20 11:25	2022/9/20 11:25		51-+		1	6		NAT. MICROBIOL								English							Place: Berlin Publisher: Nature Portfolio WOS:000590016400001				coronavirus; generation; assay; optimization; cxc chemokine receptor-5; interleukin-21; quantitation; sera
DP5DB8RS	journalArticle	2020	Palamenghi, Lorenzo; Barello, Serena; Boccia, Stefania; Graffigna, Guendalina	Mistrust in biomedical research and vaccine hesitancy: the forefront challenge in the battle against COVID-19 in Italy	European Journal of Epidemiology		0393-2990	10.1007/s10654-020-00675-8		Researchers have been working quickly and collaboratively for the development of vaccines against the COVID-19 virus. The effort of the scientific community in searching a vaccine for COVID-19 may be hampered by a diffused vaccine hesitancy. Two waves of data collection on representative samples of the Italian population (during the "first" and "second" phase of the Italian Covid-19 mitigation st…	20-Aug	2022/9/20 11:25	2022/9/20 11:25		785-788		8	35		Eur. J. Epidemiol.								English							Place: Dordrecht Publisher: Springer WOS:000560874900001				Covid-19; Vaccine hesitancy; Vaccine effectiveness; science; Trust in science; Trust in vaccine
DR34HICI	journalArticle	2020	Dicke, M.; Eilenberg, J.; Salles, J. Falcao; Jensen, A. B.; Lecocq, A.; Pijlman, G. P.; van Loon, J. J. A.; van Oers, M. M.	Edible insects unlikely to contribute to transmission of coronavirus SARS-CoV-2	Journal of Insects as Food and Feed			10.3920/JIFF2020.0039		In the context of food safety, edible insects are evaluated for biological hazards such as microbial pathogens according to regulations currently in place. When the European Food Safety Authority evaluated the hazards of edible insects as a potential source of pathogenic viruses for humans and livestock, the novel zoonotic coronavirus SARS-CoV-2 had not yet emerged but other pathogenic coronaviru…	2020	2022/9/20 11:25	2022/9/20 11:25		333-339		4	6		J. Insects Food Feed								English							Place: Wageningen Publisher: Wageningen Academic Publishers WOS:000562087000002				SARS-CoV-2; vaccine; coronavirus; virus; vector; ace2; respiratory syndrome coronavirus; diptera; food safety
B26QNTF9	journalArticle	2020	Oscar, Thomas P.	A multiple therapy hypothesis for treatment of COVID-19 patients	Medical Hypotheses		0306-9877	10.1016/j.mehy.2020.110353		The coronavirus disease 2019 (COVID-19) pandemic, which is caused by the severe acute respiratory syndrome coronavirus 2 (SARS-CoV-2), has killed more than one million people as of October 1, 2020. Consequently, a search is on for a treatment that can bring the pandemic to an end. However, treatments (vaccine, antiviral, plasma) that are directed at specific viral proteins (RNA polymerase, spike …	20-Dec	2022/9/20 11:25	2022/9/20 11:25		110353			145		Med. Hypotheses								English							Place: Edinburgh Publisher: Churchill Livingstone WOS:000597282700008				covid-19; SARS-CoV-2; Coronavirus; binding; temperature; Pandemic; receptors; strains; influenza-virus; surface; Cool air therapy; cultured-cells; Dose-response; dose-response model; human salmonellosis; Oxygen species cool air respirator; Purified air technology; risk-assessment model
ZI9N9SNL	journalArticle	2020	Dong, Dong; Xu, Richard Huan; Wong, Eliza Lai-yi; Hung, Chi-Tim; Feng, Da; Feng, Zhanchun; Yeoh, Eng-kiong; Wong, Samuel Yeung-shan	Public preference for COVID-19 vaccines in China: A discrete choice experiment	Health Expectations		1369-6513	10.1111/hex.13140		Background As the coronavirus disease 2019 (COVID-19) pandemic is sweeping across the globe, there is an urgent need to develop effective vaccines as the most powerful strategy to end the pandemic. This study aimed to examine how factors related to vaccine characteristics, their social normative influence and convenience of vaccination can affect the public's preference for the uptake of the COVI…	20-Dec	2022/9/20 11:25	2022/9/20 11:25		1543-1578		6	23		Health Expect.								English							Place: Hoboken Publisher: Wiley WOS:000575305500001				united-states; impact; vaccine; COVID-19 pandemic; willingness to pay; trends; Chinese public; validity; online; discrete choice experiment; seasonal influenza vaccine
8S3TQ6GC	journalArticle	2020	Ismail, Mohamad Bachar; Al Omari, Sarah; Rafei, Rayane; Dabboussi, Fouad; Hamze, Monzer	COVID-19 in children: Could pertussis vaccine play the protective role?	Medical Hypotheses		0306-9877	10.1016/j.mehy.2020.110305		While COVID-19 continues to spread across the globe, diligent efforts are made to understand its attributes and dynamics to help develop treatment and prevention measures. The paradox pertaining to children being the least affected by severe illness poses exciting opportunities to investigate potential protective factors. In this paper, we propose that childhood vaccination against pertussis (who…	20-Dec	2022/9/20 11:25	2022/9/20 11:25		110305			145		Med. Hypotheses								English							Place: Edinburgh Publisher: Churchill Livingstone WOS:000597282700004				covid-19; SARS-CoV-2; infection; mortality; antibodies; health; Children; cross-reactivity; immunization; persistence; respiratory syncytial virus; heterologous immunity; bcg vaccination; Cross-reactivity; Heterologous immunity; Non-specific effects; Pertussis vaccine
RGS627JW	journalArticle	2020	Walls, Alexandra C.; Fiala, Brooke; Schafer, Alexandra; Wrenn, Samuel; Pham, Minh N.; Murphy, Michael; Tse, Longping; Shehata, Laila; O'Connor, Megan A.; Chen, Chengbo; Navarro, Mary Jane; Miranda, Marcos C.; Pettie, Deleah; Ravichandran, Rashmi; Kraft, John C.; Ogohara, Cassandra; Palser, Anne; Chalk, Sara; Lee, E.-Chiang; Guerriero, Kathryn; Kepl, Elizabeth; Chow, Cameron M.; Sydeman, Claire; H…	Elicitation of Potent Neutralizing Antibody Responses by Designed Protein Nanoparticle Vaccines for SARS-CoV-2	Cell		0092-8674	10.1016/j.cell.2020.10.043		A safe, effective, and scalable vaccine is needed to halt the ongoing SARS-CoV-2 pandemic. We describe the structure-based design of self-assembling protein nanoparticle immunogens that elicit potent and protective antibody responses against SARS-CoV-2 in mice. The nanoparticle vaccines display 60 SARS-CoV-2 spike receptor-binding domains (RBDs) in a highly immunogenic array and induce neutralizi…	2020/11/25	2022/9/20 11:25	2022/9/20 11:25		1367-+		5	183		Cell								English							Place: Cambridge Publisher: Cell Press WOS:000593203800018				receptor; mutations; ace2; spike protein; coronaviruses; mers; human monoclonal-antibody; conformational-changes
RRNGFJDX	journalArticle	2020	McDonald, Helen; Tessier, Elise; White, Joanne M.; Woodruff, Matthew; Knowles, Charlotte; Bates, Chris; Parry, John; Walker, Jemma L.; Scott, J. Anthony; Smeeth, Liam; Yarwood, Joanne; Ramsay, Mary; Edelstein, Michael	Early impact of the coronavirus disease (COVID-19) pandemic and physical distancing measures on routine childhood vaccinations in England, January to April 2020	Eurosurveillance		1560-7917	10.2807/1560-7917.ES.2020.25.19.2000848		Using electronic health records, we assessed the early impact of coronavirus disease (COVID-19) on routine childhood vaccination in England by 26 April 2020. Measles-mumps-rubella vaccination counts fell from February 2020, and in the 3 weeks after introduction of physical distancing measures were 19.8% lower (95% confidence interval: -20.7 to -18.9) than the same period in 2019, before improving…	2020/5/14	2022/9/20 11:25	2022/9/20 11:25		7月12日		19	25		Eurosurveillance								English							Place: Stockholm Publisher: Eur Centre Dis Prevention & Control WOS:000533645200002
7RNJ3XPU	journalArticle	2020	Brown, Alistair S.; Ackerley, David F.; Calcott, Mark J.	High-Throughput Screening for Inhibitors of the SARS-CoV-2 Protease Using a FRET-Biosensor	Molecules			10.3390/molecules25204666		The global SARS-CoV-2 pandemic started late 2019 and currently continues unabated. The lag-time for developing vaccines means it is of paramount importance to be able to quickly develop and repurpose therapeutic drugs. Protein-based biosensors allow screening to be performed using routine molecular laboratory equipment without a need for expensive chemical reagents. Here we present a biosensor fo…	20-Oct	2022/9/20 11:25	2022/9/20 11:25		4666		20	25		Molecules								English							Place: Basel Publisher: Mdpi WOS:000585662100001				covid-19; SARS-CoV-2; hepatitis-c virus; 3CLPro; apomorphine; aporphine; cysteine protease; ebselen; pd 404,182; sars-cov 3cl(pro)
JPILUDEG	journalArticle	2020	Naveed, Muhammad; Baleanu, Dumitru; Rafiq, Muhammad; Raza, Ali; Soori, Atif Hassan; Ahmed, Nauman	Dynamical Behavior and Sensitivity Analysis of a Delayed Coronavirus Epidemic Model	Cmc-Computers Materials & Continua		1546-2218	10.32604/cmc.2020.011534		Mathematical delay modelling has a significant role in the different disciplines such as behavioural, social, physical, biological engineering, and bio-mathematical sciences. The present work describes mathematical formulation for the transmission mechanism of a novel coronavirus (COVID-19). Due to the unavailability of vaccines for the coronavirus worldwide, delay factors such as social distance…	2020	2022/9/20 11:25	2022/9/20 11:25		225-241		1	65		CMC-Comput. Mat. Contin.								English							Place: Henderson Publisher: Tech Science Press WOS:000552255300014				stability analysis; wuhan; reproduction number; mathematical-model; numerical-analysis; Coronavirus (COVID-19); delay mathematical model; sensitive analysis
HQY6F8NE	journalArticle	2020	Jackson, L. A.; Anderson, E. J.; Rouphael, N. G.; Roberts, P. C.; Makhene, M.; Coler, R. N.; McCullough, M. P.; Chappell, J. D.; Denison, M. R.; Stevens, L. J.; Pruijssers, A. J.; McDermott, A.; Flach, B.; Doria-Rose, N. A.; Corbett, K. S.; Morabito, K. M.; O'Dell, S.; Schmidt, S. D.; Swanson, P. A.; Padilla, M.; Mascola, J. R.; Neuzil, K. M.; Bennett, H.; Sun, W.; Peters, E.; Makowski, M.; Alber…	An mRNA Vaccine against SARS-CoV-2-Preliminary Report	New England Journal of Medicine		0028-4793	10.1056/NEJMoa2022483		BACKGROUND The severe acute respiratory syndrome coronavirus 2 (SARS-CoV-2) emerged in late 2019 and spread globally, prompting an international effort to accelerate development of a vaccine. The candidate vaccine mRNA-1273 encodes the stabilized prefusion SARS-CoV-2 spike protein. METHODS We conducted a phase 1, dose-escalation, open-label trial including 45 healthy adults, 18 to 55 years of age…	2020/11/12	2022/9/20 11:25	2022/9/20 11:25		1920-1931		20	383		N. Engl. J. Med.								English							Place: Waltham Publisher: Massachusetts Medical Soc WOS:000588782400009				coronavirus; spike; antibody-responses
2U4FSEI5	journalArticle	2020	Langdon-Embry, Marisa; Papadouka, Vikki; Cheng, Iris; Almashhadani, Mohammed; Ternier, Alexandra; Zucker, Jane R.	Rebound in Routine Childhood Vaccine Administration Following Decline During the COVID-19 Pandemic - New York City, March 1-June 27, 2020	Mmwr-Morbidity and Mortality Weekly Report		0149-2195	10.15585/mmwr.mm6930a3			2020/7/31	2022/9/20 11:25	2022/9/20 11:25		999-1001		30	69		MMWR-Morb. Mortal. Wkly. Rep.								English							Place: Atlanta Publisher: Centers Disease Control & Prevention WOS:000554866700004
NVA7FPTU	journalArticle	2020	Holm, Soren	Controlled human infection with SARS-CoV-2 to study COVID-19 vaccines and treatments: bioethics in Utopia	Journal of Medical Ethics		0306-6800	10.1136/medethics-2020-106476		A number of papers have appeared recently arguing for the conclusion that it is ethically acceptable to infect healthy volunteers with severe acute respiratory syndrome coronavirus 2 as part of research projects aimed at developing COVID-19 vaccines or treatments. This position has also been endorsed in a statement by a working group for the WHO. The papers generally argue that controlled human i…	20-Sep	2022/9/20 11:25	2022/9/20 11:25		569-573		9	46		J. Med. Ethics								English							Place: London Publisher: Bmj Publishing Group WOS:000566987200003				research ethics; research on special populations
Y83C8FAF	journalArticle	2020	Hosseini Rad S M, Ali; McLellan, Alexander D.	Implications of SARS-CoV-2 Mutations for Genomic RNA Structure and Host microRNA Targeting	International Journal of Molecular Sciences			10.3390/ijms21134807		The SARS-CoV-2 virus is a recently-emerged zoonotic pathogen already well adapted to transmission and replication in humans. Although the mutation rate is limited, recently introduced mutations in SARS-CoV-2 have the potential to alter viral fitness. In addition to amino acid changes, mutations could affect RNA secondary structure critical to viral life cycle, or interfere with sequences targeted…	20-Jul	2022/9/20 11:25	2022/9/20 11:25		4807		13	21		Int. J. Mol. Sci.								English							Place: Basel Publisher: Mdpi WOS:000550205600001				SARS-CoV-2; infection; messenger-rna; prediction; virus; replication; peptides; expression; strategy; miRNA; secondary structure; conserved mutation; RNA secondary structure; sequences
5LA9GQDQ	journalArticle	2020	Li, Hongyue; Zhao, Chaoyue; Zhang, Yuhang; Yuan, Fei; Zhang, Qi; Shi, Xuanling; Zhang, Linqi; Qin, Chengfeng; Zheng, Aihua	Establishment of replication-competent vesicular stomatitis virus-based recombinant viruses suitable for SARS-CoV-2 entry and neutralization assays	Emerging Microbes & Infections			10.1080/22221751.2020.1830715		Replication-competent vesicular stomatitis virus (VSV)-based recombinant viruses are useful tools for studying emerging and highly pathogenic enveloped viruses in level 2 biosafety facilities. Here, we used a replication-competent recombinant VSVs (rVSVs) encoding the spike (S) protein of SARS-CoV-2 in place of the original G glycoprotein (rVSV-eGFP-SARS-CoV-2) to develop a high-throughput entry …	2020/1/1	2022/9/20 11:25	2022/9/20 11:25		2269-2277		1	9		Emerg. Microbes Infect.								English							Place: Abingdon Publisher: Taylor & Francis Ltd WOS:000585746200001				SARS-CoV-2; entry; protein; glycoprotein; replication-competent; vsv; neutralization assay; pseudotyped virus; diarrhea-virus
26FZZT23	journalArticle	2021	Charan, Jaykaran; Bhardwaj, Pankaj; Dutta, Siddhartha; Kaur, Rimplejeet; Bist, Sunil Kumar; Detha, Mohan Dan; Kanchan, Tanuj; Yadav, Dharamveer; Mitra, Prasenjit; Sharma, Praveen	Use of Complementary and Alternative Medicine (CAM) and Home Remedies by COVID-19 Patients: A Telephonic Survey	Indian Journal of Clinical Biochemistry		0970-1915	10.1007/s12291-020-00931-4		COVID-19 is caused by a novel coronavirus which was first reported in Wuhan city, China. The pandemic has led to considerable mortality globally. India, at present has the second largest burden of COVID-19 cases globally. Clinical trials with new interventions, including new vaccine candidates are being explored in the scientific world. Countries like China and India, with a rich history of tradi…	21-Jan	2022/9/20 11:25	2022/9/20 11:25		108-111		1	36		Indian J. Clin. Biochem.								English							Place: New Delhi Publisher: Springer India WOS:000583146100001				covid-19; immune-system; curcumin; cam; Complimentary alternative medicine
S54TX22T	journalArticle	2020	Cintulova, Lucia Ludvigh; Budayova, Zuzana; Radkova, Libusa	ATTITUDES OF ROMA TOWARDS QUARANTINE AND RESTRICTIONS DUE TO SPREADING COVID-19 AND THEIR IMPACTS ON LIFE IN THE ROMA SETTLEMENT	Acta Missiologica					Background: The study analyses the perception of risks of pandemic due COVID-19 by Roma people living in Roma settlement Zehra and their attitudes to quarantine, emergency actions and vaccination against influenza and their willingness to get vaccinated with the forthcoming vaccine against COVID-19. Methods: We used quantitative research to collect data at the time of first wave of COVID-19 epide…	2020	2022/9/20 11:25	2022/9/20 11:25		152-169		2	14		Acta Missiol.								English							Place: Bratislava Publisher: St Elizabeth Univ Health & Social Work Bratislava WOS:000595546800014				covid-19; Attitudes to vaccination; Roma people; Social impacts of epidemic; Street work with Roma people
7TRWZV7P	journalArticle	2020	Smith, Emery; Davis-Gardner, Meredith E.; Garcia-Ordonez, Ruben D.; Nguyen, Tu-Trinh; Hull, Mitchell; Chen, Emily; Baillargeon, Pierre; Scampavia, Louis; Strutzenberg, Timothy; Griffin, Patrick R.; Farzan, Michael; Spicer, Timothy P.	High-Throughput Screening for Drugs That Inhibit Papain-Like Protease in SARS-CoV-2	Slas Discovery		2472-5552	10.1177/2472555220963667		The emergence of severe acute respiratory syndrome coronavirus 2 (SARS-CoV-2) in late 2019 has triggered an ongoing global pandemic whereby infection may result in a lethal severe pneumonia-like disease designated as coronavirus disease 2019 (COVID-19). To date, millions of confirmed cases and hundreds of thousands of deaths have been reported worldwide, and there are currently no medical counter…	20-Dec	2022/9/20 11:25	2022/9/20 11:25		1152-1161		10	25		SLAS Discov.								English							Place: New York Publisher: Elsevier Science Inc WOS:000581794100001				covid-19; PLpro; hts; cell-based
DRI72ZMG	journalArticle	2020	Khan, Mohd Imran; Khan, Zainul A.; Baig, Mohammad Hassan; Ahmad, Irfan; Farouk, Abd-ElAziem; Song, Young Goo; Dong, Jae-Jun	Comparative genome analysis of novel coronavirus (SARS-CoV-2) from different geographical locations and the effect of mutations on major target proteins: Anin silicoinsight	Plos One		1932-6203	10.1371/journal.pone.0238344		A novel severe acute respiratory syndrome-related coronavirus-2 (SARS-CoV-2) causing COVID-19 pandemic in humans, recently emerged and has exported in more than 200 countries as a result of rapid spread. In this study, we have made an attempt to investigate the SARS-CoV-2 genome reported from 13 different countries, identification of mutations in major coronavirus proteins of these different SARS…	2020/9/3	2022/9/20 11:25	2022/9/20 11:25		e0238344		9	15		PLoS One								English							Place: San Francisco Publisher: Public Library Science WOS:000571063300049				domain; receptor; stability; spike protein; cov; respiratory syndrome coronavirus; sars-coronavirus
MM5YNFF7	journalArticle	2020	Karamitros, Timokratis; Papadopoulou, Gethsimani; Bousali, Maria; Mexias, Anastasios; Tsiodras, Sotirios; Mentis, Andreas	SARS-CoV-2 exhibits intra-host genomic plasticity and low-frequency polymorphic quasispecies	Journal of Clinical Virology		1386-6532	10.1016/j.jcv.2020.104585		In December 2019, an outbreak of atypical pneumonia (Coronavirus disease 2019 -COVID-19) associated with a novel coronavirus (SARS-CoV-2) was reported in Wuhan city, Hubei province, China. The outbreak was traced to a seafood wholesale market and human to human transmission was confirmed. The rapid spread and the death toll of the new epidemic warrants immediate intervention. The intra-host genom…	20-Oct	2022/9/20 11:25	2022/9/20 11:25		104585			131		J. Clin. Virol.								English							Place: Amsterdam Publisher: Elsevier WOS:000571894100012				covid-19; SARS-CoV-2; pneumonia; sars; acute respiratory syndrome; alignment; recombination; COVID-19 epidemic; Quasispecies; human coronavirus; emergence; diversity; evolutionary epidemiology; Genomic rearrangements; Intra-host variability; Molecular diagnostics
F95WWTV8	journalArticle	2020	Yellapu, Nanda Kumar; Patel, Shachi; Zhang, Bo; Meier, Richard; Neums, Lisa; Pei, Dong; Xia, Qing; Rotich, Duncan; Zimmermann, Rosalyn C.; Nissen, Emily; Bell-Glenn, Shelby; Shae, Whitney; Hu, Jinxiang; Chalise, Prabhakar; Chollet-Hinton, Lynn; Koestler, Devin C.; Thompson, Jeffery A.	Evolutionary Analysis of Severe Acute Respiratory Syndrome Coronavirus 2 (SARS-CoV-2) Reveals Genomic Divergence with Implications for Universal Vaccine Efficacy	Vaccines			10.3390/vaccines8040591		Coronavirus disease (COVID-19), caused by severe acute respiratory syndrome coronavirus 2 (SARS-CoV-2), is one of the pressing contemporary public health challenges. Investigations into the genomic structure of SARS-CoV-2 may inform ongoing vaccine development efforts and/or provide insights into vaccine efficacy to fight against COVID-19. Evolutionary analysis of 540 genomes spanning 20 differen…	20-Dec	2022/9/20 11:25	2022/9/20 11:25		591		4	8		Vaccines								English							Place: Basel Publisher: Mdpi WOS:000601774000001				covid-19; SARS-CoV-2; impact; epidemiology; mutations; outbreak; pathogenesis; global health; phylogenetic analysis; vaccine development; diversity; region; targets; genomic divergence; substitutions
LNJT63VU	journalArticle	2020	Duran-Frigola, Miquel; Bertoni, Martino; Blanco, Roi; Martinez, Victor; Pauls, Eduardo; Alcalde, Victor; Turon, Gemma; Villegas, Nuria; Fernandez-Torras, Adria; Pons, Carles; Mateo, Lidia; Guitart-Pla, Oriol; Badia-i-Mompel, Pau; Gimeno, Aleix; Soler, Nicolas; Brun-Heath, Isabelle; Zaragoza, Hugo; Aloy, Patrick	Bioactivity Profile Similarities to Expand the Repertoire of COVID-19 Drugs	Journal of Chemical Information and Modeling		1549-9596	10.1021/acs.jcim.0c00420		Until a vaccine becomes available, the current repertoire of drugs is our only therapeutic asset to fight the SARS-CoV-2 outbreak. Indeed, emergency clinical trials have been launched to assess the effectiveness of many marketed drugs, tackling the decrease of viral load through several mechanisms. Here, we present an online resource, based on small-molecule bioactivity signatures and natural lan…	2020/12/28	2022/9/20 11:25	2022/9/20 11:25		5730-5734		12	60		J. Chem Inf. Model.								English							Place: Washington Publisher: Amer Chemical Soc WOS:000608875100011
4RZ9FBYC	journalArticle	2020	Sharp, Kumar; Dange, Shubhangi	Comparative Analysis of SARS-CoV2 with Special Emphasis on Genome Sequences	Journal of Pure and Applied Microbiology		0973-7510	10.22207/JPAM.14.SPL1.44		Coronavirus disease 2019 (COVID-19), caused by severe acute respiratory syndrome coronavirus - 2 (SARS-CoV-2), was declared a global pandemic on 11th March, 2020 by World Health Organization. As of now,27th May,2020, there are about 54,88,825 infected cases and 3,49,095 deaths globally. Coronavirus samples collected from all the countries have been sequenced for advanced studies in a bid to under…	20-May	2022/9/20 11:25	2022/9/20 11:25		1053-1064			14		J. Pure Appl. Microbiol.								English							Place: Bhopal Publisher: Dr M N Khan WOS:000538476900044				covid-19; Coronavirus; Phylogeny; Mutations; Genome Sequence
9K2DX5C7	journalArticle	2020	Ellis, John; Erickson, Nathan; Glow, Sheryl; West, Keith; Lacoste, Stacey; Godson, Dale	Infection of calves with in-vivo passaged bovine parainfluenza-3 virus, alone or in combination with bovine respiratory syncytial virus and bovine coronavirus	Canadian Journal of Veterinary Research-Revue Canadienne De Recherche Veterinaire					Bovine respiratory disease complex is etiologically complex and usually involves co-infection by several agents, including bovine parainfluenza virus-3 (BPIV-3), bovine respiratory syncytial virus (BRSV), and bovine coronavirus (BCoV). Traditionally, vaccines have been tested in seronegative calves infected with a single in vitro-passaged agent, often with little disease, resulting in unvaccinate…	20-Jul	2022/9/20 11:25	2022/9/20 11:25		163-171		3	84		Can. J. Vet. Res.-Rev. Can. Rech. Vet.								English							Place: Ottawa Publisher: Canadian Vet Med Assoc WOS:000607846600001				responses; vaccine; disease; antibodies; pneumonia; diarrhea; colostrum; duration; inoculation; feedlot cattle
T26CY7N3	journalArticle	2020	Kumar, Sumit; Sharma, Prem Prakash; Shankar, Uma; Kumar, Dhruv; Joshi, Sanjeev K.; Pena, Lindomar; Durvasula, Ravi; Kumar, Amit; Kempaiah, Prakasha; Poonam; Rathi, Brijesh	Discovery of New Hydroxyethylamine Analogs against 3CL(pro) Protein Target of SARS-CoV-2: Molecular Docking, Molecular Dynamics Simulation, and Structure-Activity Relationship Studies	Journal of Chemical Information and Modeling		1549-9596	10.1021/acs.jcim.0c00326		The novel coronavirus, SARS-CoV-2, has caused a recent pandemic called COVID-19 and a severe health threat around the world. In the current situation, the virus is rapidly spreading worldwide, and the discovery of a vaccine and potential therapeutics are critically essential. The crystal structure for the main protease (M-pro) of SARS-CoV-2, 3-chymotrypsin-like cysteine protease (3CL(pro)), was r…	2020/12/28	2022/9/20 11:25	2022/9/20 11:25		5754-5770		12	60		J. Chem Inf. Model.								English							Place: Washington Publisher: Amer Chemical Soc WOS:000608875100014				binding; coronavirus infection; inhibitors
3TVGD448	journalArticle	2022	Chirisa, Innocent; Mutambisi, Tafadzwa; Chivenge, Marcyline; Mabaso, Elias; Matamanda, Abraham R.; Ncube, Roselin	The urban penalty of COVID-19 lockdowns across the globe: manifestations and lessons for Anglophone sub-Saharan Africa	Geojournal		0343-2521	10.1007/s10708-020-10281-6		The paper contributes towards deciphering and decoding the misery of the urban poor in light of the COVID-19 scourge. The paper unpacks urban poverty in light of the corona virus. The emergence of the COVID-19 and the lack of any vaccines requires physical distancing as preventative measures to contain and reduce the spread of the virus. Governments across the world, including in Anglophone Sub S…	22-Apr	2022/9/20 11:25	2022/9/20 11:25		815-828		2	87		GeoJournal								English							Place: Dordrecht Publisher: Springer WOS:000565001800001				covid-19; health; Pandemic; Lockdown; poverty; Management; Poverty; Informality; slum; Urban policy; Urbanity
9CDRL68Q	journalArticle	2020	Johnson, Neil F.; Velasquez, Nicolas; Restrepo, Nicholas Johnson; Leahy, Rhys; Gabriel, Nicholas; El Oud, Sara; Minzhang, Zheng; Manrique, Pedro; Wuchty, Stefan; Lupu, Yonatan	The online competition between pro- and anti-vaccination views	Nature		0028-0836	10.1038/s41586-020-2281-1		Insights into the interactions between pro- and anti-vaccination clusters on Facebook can enable policies and approaches that attempt to interrupt the shift to anti-vaccination views and persuade undecided individuals to adopt a pro-vaccination stance. Distrust in scientific expertise(1-14) is dangerous. Opposition to vaccination with a future vaccine against SARS-CoV-2, the causal agent of COVID…	20-Jun	2022/9/20 11:25	2022/9/20 11:25		230-+		7811	582		Nature								English							Place: London Publisher: Nature Publishing Group WOS:000532688300006
HHTEUXHB	journalArticle	2020	Pieri, Massimo; Ciotti, Marco; Carlozzi, Nicoletta; Frassanito, Maria Loredana; Meloni, Arianna; Cistera, Alessandro; Turchetti, Giordano; Niscola, Silvia; Labate, Giuseppe; Calugi, Graziella; Bernardini, Sergio	SARS-CoV-2 infection serology validation of different methods: Usefulness of IgA in the early phase of infection	Clinica Chimica Acta		0009-8981	10.1016/j.cca.2020.09.033		Background and aims: A novel coronavirus (SARS-CoV-2) was isolated from the respiratory samples of patients with pneumonia as showed by the sequence analysis of the virus genomes obtained in Wuhan, China. The antibody response to SARS-CoV-2 is not well understood yet, but the availability of sensitive and specific serological assays will be crucial for the early diagnosis of infection, for epidem…	20-Dec	2022/9/20 11:25	2022/9/20 11:25		28-32			511		Clin. Chim. Acta								English							Place: Amsterdam Publisher: Elsevier WOS:000596438400005				SARS-CoV-2; CLIA assay; Covid-19 serological test; ECLIA assay; ELISA assay
W4NCX9VB	journalArticle	2020	Di Micco, Pierpaolo; Di Micco, Gianluca; Russo, Vincenzo; Poggiano, Maria Rita; Salzano, Ciro; Bosevski, Marijan; Imparato, Michele; Fontanella, Luca; Fontanella, Andrea	Blood Targets of Adjuvant Drugs Against COVID 19	Journal of Blood Medicine		1179-2736	10.2147/JBM.S256121		While waiting for the vaccine and/or the best treatment for COVID19, several drugs have been identified as potential adjuvant drugs to counteract the viral action. Several drugs, in fact, have been suggested for their ancillary antiviral role. Viral proteases and peptidases, may interact with well-known drugs such as anticoagulants, antihypertensives, antiserotoninergics and immunomodulants. We h…	2020	2022/9/20 11:25	2022/9/20 11:25		237-241			11		J. BLOOD MED.								English							Place: Albany Publisher: Dove Medical Press Ltd WOS:000546132800001				heparin; ace2; covid19; interleukin; ace-inhibitors; angiotensin receptor blockers; flavonoid
AJBKCA3V	journalArticle	2020	Cross, Ryan	Can adenoviral vectors overcome a checkered past to win the COVID-19 vaccine race?	Chemical & Engineering News		0009-2347				2020/5/18	2022/9/20 11:25	2022/9/20 11:25		20-23		20	98		Chem. Eng. News								English							Place: Washington Publisher: Amer Chemical Soc WOS:000534390600037
AIDH2E3C	journalArticle	2020	Hogan, Christopher; Atta, Massud; Anderson, Paul; Stead, Tej; Solomon, Matthew; Banerjee, Paul; Sleigh, Bryan; Shivdat, John; Webb McAdams, Amanda; Ganti, Latha	Knowledge and attitudes of us adults regarding COVID-19	International Journal of Emergency Medicine		1865-1372	10.1186/s12245-020-00309-6		This was a survey of the general non-healthcare-worker USA population regarding their knowledge and attitudes toward the COVID-19 pandemic. Almost everyone practiced social distancing. Women were significantly more likely to be worried about contracting the virus than men (65% vs. 43%, p = 0.0272). There was also a linear trend with age, with older Americans being more worried about contracting t…	2020/11/2	2022/9/20 11:25	2022/9/20 11:25		53		1	13		Int. J. Emergency Medicine								English							Place: London Publisher: Bmc WOS:000585613600001				covid-19; Vaccination; coronavirus; Attitudes; Social distancing
SB67NSGA	journalArticle	2020	Nguyen, Duc Duy; Gao, Kaifu; Chen, Jiahui; Wang, Rui; Wei, Guo-Wei	Unveiling the molecular mechanism of SARS-CoV-2 main protease inhibition from 137 crystal structures using algebraic topology and deep learning	Chemical Science		2041-6520	10.1039/d0sc04641h		Currently, there is neither effective antiviral drugs nor vaccine for coronavirus disease 2019 (COVID-19) caused by acute respiratory syndrome coronavirus 2 (SARS-CoV-2). Due to its high conservativeness and low similarity with human genes, SARS-CoV-2 main protease (M-pro) is one of the most favorable drug targets. However, the current understanding of the molecular mechanism of M-pro inhibition …	2020/11/28	2022/9/20 11:25	2022/9/20 11:25		12036-12046		44	11		Chem. Sci.								English							Place: Cambridge Publisher: Royal Soc Chemistry WOS:000590392400004				prediction; coronavirus; design; docking; antiviral activity
JIWV5WCK	journalArticle	2020	Ramos e Corte, Ana Carolina; Grava de Sousa, Joaquim Paulo; Grava de Sousa, Ivan Furlan; Garcia, Raquel Muarrek; Stancati, Julio	COVID-19 SAFETY RECOMMENDATIONS FOR THE REOPENING OF THE DR. JOAQUIM GRAVA CORINTHIANS TRAINING FACILITY	Revista Brasileira De Medicina Do Esporte		1517-8692	10.1590/1517-8692202026052019_0044		Since December 2019, the world has been fighting the SARS-CoV2 virus (severe acute respiratory syndrome coronavirus 2). Little is known about vaccines and forms of treatment at this point. However, the importance of preventing transmission is very clear, and one of the main measures is social isolation. Major sports tournaments, including soccer championships, have been suspended or cancelled due…	20-Oct	2022/9/20 11:25	2022/9/20 11:25		382-385		5	26		Rev. Bras. Med. Esporte								English							Place: Sao Paulo Sp Publisher: Soc Brasileira Med Esporte WOS:000579058700016				covid-19; SARS-CoV-2; injuries; Soccer
92MCREUC	journalArticle	2020	Allen, Mary Beth; Mirsaeidi, Mehdi	Health and Economy in COVID-19 Era: A Plan for Reconstituting Long-Term Economic Security	Frontiers in Public Health			10.3389/fpubh.2020.00235		COVID-19 is a rapidly evolving pandemic, which represents a multifaceted global threat. Given the economic consequences, most researchers agree that social distancing measures are an effective strategy relative to the cost. Previous studies indicate that community size as well as viral population risk groups should be considered in forming an effective targeted social distancing strategy. The res…	2020/5/27	2022/9/20 11:25	2022/9/20 11:25		235			8		Front. Public Health								English							Place: Lausanne Publisher: Frontiers Media Sa WOS:000540994500001				covid-19; pandemic; health; economy; immunity
VZPA67Z5	journalArticle	2020	Abu-Farha, Rana K.; Alzoubi, Karem H.; Khabour, Omar F.	Public Willingness to Participate in COVID-19 Vaccine Clinical Trials: A Study from Jordan	Patient Preference and Adherence		1177-889X	10.2147/PPA.S284385		Purpose: The development and production of novel vaccine to prevent COVID-19 is an international imperative to human lives. For that purpose, clinical trials have to be carried out as per international ethical standards. The current study was undertaken to examine the willingness to participate in COVID-19 vaccine clinical trials and to determine factors that might affect their decision to partic…	2020	2022/9/20 11:25	2022/9/20 11:25		2451-2458			14		Patient Prefer. Adherence								English							Place: Albany Publisher: Dove Medical Press Ltd WOS:000600624700002				covid-19; willingness; barriers; participation; Jordan; clinical trials
DUXQQ2D3	journalArticle	2020	Wang, Rui; Hozumi, Yuta; Yin, Changchuan; Wei, Guo-Wei	Decoding SARS-CoV-2 Transmission and Evolution and Ramifications for COVID-19 Diagnosis, Vaccine, and Medicine	Journal of Chemical Information and Modeling		1549-9596	10.1021/acs.jcim.0c00501		Tremendous effort has been given to the development of diagnostic tests, preventive vaccines, and therapeutic medicines for coronavirus disease 2019 (COVID-19) caused by severe acute respiratory syndrome coronavirus 2 (SARS-CoV-2). Much of this development has been based on the reference genome collected on January 5, 2020. Based on the genotyping of 15 140 genome samples collected up to June 1, …	2020/12/28	2022/9/20 11:25	2022/9/20 11:25		5853-5865		12	60		J. Chem Inf. Model.								English							Place: Washington Publisher: Amer Chemical Soc WOS:000608875100021				coronavirus; glycoprotein
LQR6A4SX	journalArticle	2020	Gupta, Amit Kumar; Khan, Md Shoaib; Choudhury, Shubham; Mukhopadhyay, Adhip; Sakshi; Rastogi, Amber; Thakur, Anamika; Kumari, Pallawi; Kaur, Manmeet; Shalu; Saini, Chanchal; Sapehia, Vandna; Barkha; Patel, Pradeep Kumar; Bhamare, Kailash T.; Kumar, Manoj	CoronaVR: A Computational Resource and Analysis of Epitopes and Therapeutics for Severe Acute Respiratory Syndrome Coronavirus-2	Frontiers in Microbiology			10.3389/fmicb.2020.01858		In December 2019, the Chinese city of Wuhan was the center of origin of a pneumonia-like disease outbreak with an unknown causative pathogen. The CDC, China, managed to track the source of infection to a novel coronavirus (2019-nCoV; SARS-CoV-2) that shares approximately 79.6% of its genome with SARS-CoV. The World Health Organization (WHO) initially declared COVID-19 as a Public Health Emergency…	2020/7/31	2022/9/20 11:25	2022/9/20 11:25		1858			11		Front. Microbiol.								English							Place: Lausanne Publisher: Frontiers Media Sa WOS:000561676600001				covid-19; SARS-CoV-2; vaccine; identification; prediction; immune-responses; sars; spike protein; nucleocapsid protein; 2019-nCoV; epitopes; global health; therapeutics; 2019-ncov; codon usage; primers
WYESET66	journalArticle	2020	Kasi, Srinivas G.; Dhir, Shashi Kant; Verma, Sanjay; Pemde, Harish Kumar; Balasubramanian, S.; Agarwalla, Sunil; Shah, Abhay K.; Shivananda, S.; Marathe, Sanjay; Chatarjee, Kripasindhu; Srirampur, Sanjay; Kalyani, Srinivas; Parekh, Bakul J.; Basavaraja, G. V.; Gupta, Piyush	Immunization During the COVID-19 Pandemic: Recommendations From Indian Academy of Pediatrics Advisory Committee on Vaccines and Immunization Practices	Indian Pediatrics		0019-6061	10.1007/s13312-020-2071-8		During the severe acute respiratory syndrome Coronavirus 2 (SARS-CoV-2) pandemic, immunization practices of all age groups, especially routine childhood vaccines, have been interrupted. Immunization is considered an essential health activity, which needs to be resumed as early as possible. This pandemic has created several unique issues related to routine immunization of individual children at cl…	20-Dec	2022/9/20 11:25	2022/9/20 11:25		1147-1152		12	57		Indian Pediatrics								English							Place: New Delhi Publisher: Springer India WOS:000604955800012				covid-19; risk; Guidelines; Missed Vaccination; Routine immunization
I7BRDYND	journalArticle	2020	Santana, Harrson S.; de Souza, Marcos R. P.; Lopes, Mariana G. M.; Souza, Johmar; Silva, Renan R. O.; Palma, Mauri S. A.; Nakano, Wilson L.; Lima, Giovanni A. S.; Munhoz, Guadalupe; Noriler, Dirceu; Taranto, Osvaldir P.; Silva Jr, Joao L.	How chemical engineers can contribute to fight the COVID-19	Journal of the Taiwan Institute of Chemical Engineers		1876-1070	10.1016/j.jtice.2020.11.024		The SARS-CoV-2 virus, promoter of COVID-19, already infected millions of people around the world, resulting in thousands of fatal victims. Facing this unprecedented crisis in human history, several research groups, industrial companies and governments have been spending efforts to develop vaccines and medications. People from distinct knowledge fields are doing their part in order to overcome thi…	20-Nov	2022/9/20 11:25	2022/9/20 11:25		67-80			116		J. Taiwan Inst. Chem. Eng.								English							Place: Amsterdam Publisher: Elsevier WOS:000599318600009				SARS-CoV-2; Vaccine; transmission; spread; covid19; design; flow; 3d; Artificial intelligence; Fluid dynamics; Microfluidics
RWAJ82XT	journalArticle	2020	Forsyth, Donelson R.	Group-Level Resistance to Health Mandates During the COVID-19 Pandemic: A Groupthink Approach	Group Dynamics-Theory Research and Practice		1089-2699	10.1037/gdn0000132		Public health interventions, such as mandated vaccinating or quarantining during an epidemic, are necessary to limit the spread of communicable diseases, but in many cases, certain groups resist these initiatives. For example, during the COVID-19 pandemic of 2020, antiquarantine groups protested the mandate to socially distance and remain at home, claiming these directives violated their right to…	20-Sep	2022/9/20 11:25	2022/9/20 11:25		139-152		3	24		Group Dyn.-Theory Res. Pract.								English							Place: Washington Publisher: Educational Publishing Foundation-American Psychological Assoc WOS:000572854200003				covid-19; behavior; rejection; public health; decision-making; care; maintenance; quality; leadership; social identity; extremism; conformity; group cohesion; groupthink
LCGUDPQU	journalArticle	2020	Khairkhah, Niloofar; Aghasadeghi, Mohammad Reza; Namvar, Ali; Bolhassani, Azam	Design of novel multiepitope constructs-based peptide vaccine against the structural S, N and M proteins of human COVID-19 using immunoinformatics analysis	Plos One		1932-6203	10.1371/journal.pone.0240577		The causative agent of severe acute respiratory syndrome (SARS) reported by the Chinese Center for Disease Control (China CDC) has been identified as a novelBetacoronavirus(SARS-CoV-2). A computational approach was adopted to identify multiepitope vaccine candidates against SARS-CoV-2 based on S, N and M proteins being able to elicit both humoral and cellular immune responses. In this study, the …	2020/10/15	2022/9/20 11:25	2022/9/20 11:25		e0240577		10	15		PLoS One								English							Place: San Francisco Publisher: Public Library Science WOS:000581814700078				prediction; receptor; determinants; binding; immune-responses; spike protein; sars-coronavirus
Q722I65N	journalArticle	2020	Lyu, Jinglu; Miao, Tianyu; Dong, Jiajia; Cao, Ranran; Li, Yan; Chen, Qianming	Reflection on lower rates of COVID-19 in children: Does childhood immunizations offer unexpected protection?	Medical Hypotheses		0306-9877	10.1016/j.mehy.2020.109842		The incidence of COVID-19 in children and teenagers is only about 2% in China. Children had mild symptoms and hardly infected other children or adults. It is worth considering that children are the most vulnerable to respiratory pathogens, but fatal SARS-like virus had not caused severe cases among them. According to the pathological studies of COVID-19 and SARS, a sharp decrease in T lymphocytes…	20-Oct	2022/9/20 11:25	2022/9/20 11:25		109842			143		Med. Hypotheses								English							Place: Edinburgh Publisher: Churchill Livingstone WOS:000577511800014				covid-19; memory; t-cells; sars; acute respiratory syndrome; Childhood immunization; Immune fitness; Mild symptom in children; Trained immunity
5GWPZSWP	journalArticle	2020	Lv, Chenfei; Shi, Tingting; Zhu, Pengpeng; Peng, Xing; Cao, Shangshang; Yan, Yan; Ojha, Nishant Kumar; Liao, Min; Zhou, Jiyong	Construction of an infectious bronchitis virus vaccine strain carrying chimeric S1 gene of a virulent isolate and its pathogenicity analysis	Applied Microbiology and Biotechnology		0175-7598	10.1007/s00253-020-10834-2		Infectious bronchitis virus (IBV) is a member of genus gamma-coronavirus in the familyCoronaviridae, causing serious economic losses to the poultry industry. Reverse genetics is a common technique to study the biological characteristics of viruses. So far, there is no BAC reverse genetic system available for rescue of IBV infectious clone. In the present study, a new strategy for the construction…	20-Oct	2022/9/20 11:25	2022/9/20 11:25		8427-8437		19	104		Appl. Microbiol. Biotechnol.								English							Place: New York Publisher: Springer WOS:000560984400002				rna; system; spike protein; genome; tropism; Infectious bronchitis virus; Pathogenicity; reverse genetics; cdna; Chimeric S1 gene; Reverse genetics
WLI6JFWW	journalArticle	2020	Whitelaw, Sera; Mamas, Mamas A.; Topol, Eric; Van Spall, Harriette G. C.	Applications of digital technology in COVID-19 pandemic planning and response	Lancet Digital Health			10.1016/S2589-7500(20)30142-4		With high transmissibility and no effective vaccine or therapy, COVID-19 is now a global pandemic. Government-coordinated efforts across the globe have focused on containment and mitigation, with varying degrees of success. Countries that have maintained low COVID-19 per-capita mortality rates appear to share strategies that include early surveillance, testing, contact tracing, and strict quarant…	20-Aug	2022/9/20 11:25	2022/9/20 11:25		E435-E440		8	2		Lancet Digit. Health								English							Place: Amsterdam Publisher: Elsevier WOS:000562799500013
87TJU92H	journalArticle	2020	Hakmi, Mohammed; Bouricha, El Mehdi; Kandoussi, Ilham; El Harti, Jaouad; Ibrahimi, Azeddine	Repurposing of known anti-virals as potential inhibitors for SARS-CoV-2 main protease using molecular docking analysis	Bioinformation		0973-8894	10.6026/97320630016301		The new SARS-CoV-2 coronavirus is the causative agent of the COVID-19 pandemic outbreak that affected more than 190 countries worldwide with more than 292,000 confirmed cases and over 12,700 deaths. There is at the moment no vaccine or effective treatment for this disease which constitutes a serious global health problem. It is of interest to use a structure based virtual screening approach for t…	20-Apr	2022/9/20 11:25	2022/9/20 11:25		301-305		4	16		Bioinformation								English							Place: Tamil Nadu Publisher: Biomedical Informatics WOS:000528190800004				covid-19; protease; inhibitors; virtual screening; SARS-Cov-2
NEGEV3DM	journalArticle	2020	Phadke, Mrudula; Saunik, Sujata	COVID-19 treatment by repurposing drugs until the vaccine is in sight	Drug Development Research		0272-4391	10.1002/ddr.21666		Corona virus disease (COVID-19) has created pandemic in the world as declared by WHO on March 12, 2020. It is a viral disease caused by SARS-CoV 2 virus and has affected large populations in over 120 countries. There is no specific treatment available and management is empirical. Until such time that an effective vaccine is available for COVID-19 viral infection, one can repurpose known therapeut…	20-Aug	2022/9/20 11:25	2022/9/20 11:25		541-543		5	81		Drug Dev. Res.								English							Place: Hoboken Publisher: Wiley WOS:000522071500001
8PIHTF9P	journalArticle	2020	Sewda, Anshuman; Dutt Gupta, Shiv	Genetics of Severe Acute Respiratory Syndrome Coronavirus-2 and Diagnosis of Coronavirus Disease-2019: An Overview	Journal of Health Management		0972-0634	10.1177/0972063420935548		Severe acute respiratory syndrome coronavirus-2 (SARS-CoV-2) is a positive sense, single-stranded RNA virus, responsible for the 'coronavirus disease-2019' (COVID-19) pandemic. SARS-CoV-2 belongs to the sarbecovirus (lineage-B) sub-genus within the betacoronavirus genus of the coronaviridae family. SARS-CoV-2 shares similarities with SARS-CoV, which was responsible for the 2003 SARS epidemic. SAR…	20-Jun	2022/9/20 11:25	2022/9/20 11:25		236-247		2	22		J. Health Manag.								English							Place: New Delhi Publisher: Sage Publications India Pvt Ltd WOS:000558728700001				covid-19; SARS-CoV-2; rna; coronavirus; diagnosis; genetics; rt-pcr; sars coronavirus
78R2T6V3	journalArticle	2020	Morris, K. C.; Thomas, Douglas S.	Measuring Manufacturing's Significance in the USA	Smart and Sustainable Manufacturing Systems		2520-6478	10.1520/SSMS20200054		Economic value added is a primary metric for measuring manufacturing activity; however, this metric and others exclude approximately half of the economic activity necessary for producing manufactured goods. With the recent disruption in the supply of goods and services by the coronavirus disease pandemic, the criticality of these supply chains to production has become more apparent. Measuring and…	20-Dec	2022/9/20 11:25	2022/9/20 11:25		289-293		3	4		Smart Sustain. Manuf. Syst.								English							Place: W Conshohocken Publisher: Amer Soc Testing Materials WOS:000598077200010				economics; economic impact; input-output analysis; manufacturing impact; manufacturing metrics; value added
U3SRY428	journalArticle	2020	Abdelhafiz, Ahmed Samir; Mohammed, Zeinab; Ibrahim, Maha Emad; Ziady, Hany H.; Alorabi, Mohamed; Ayyad, Mohamed; Sultan, Eman A.	Knowledge, Perceptions, and Attitude of Egyptians Towards the Novel Coronavirus Disease (COVID-19)	Journal of Community Health		0094-5145	10.1007/s10900-020-00827-7		Coronavirus disease 2019 (COVID-19) has been recognized as a pandemic by the World Health Organization. Global efforts have been exerted to prevent the spreading of the disease through political decisions together with personal behaviors, which depend on awareness of the public. The goal of this study is to assess the knowledge, perceptions and attitude of the Egyptian public towards the COVID-19…	20-Oct	2022/9/20 11:25	2022/9/20 11:25		881-890		5	45		J. Community Health								English							Place: New York Publisher: Springer WOS:000528135100001				covid-19; epidemic; Attitude; Perceptions; Knowledge; Egypt
63UF9A5Q	journalArticle	2020	Scully, Eileen P.; Haverfield, Jenna; Ursin, Rebecca L.; Tannenbaum, Cara; Klein, Sabra L.	Considering how biological sex impacts immune responses and COVID-19 outcomes	Nature Reviews Immunology		1474-1733	10.1038/s41577-020-0348-8		Why are males more susceptible to severe COVID-19 than females? In this Perspective, Sabra Klein and colleagues consider the sex differences in the immune system that may contribute to this sex bias. A male bias in mortality has emerged in the COVID-19 pandemic, which is consistent with the pathogenesis of other viral infections. Biological sex differences may manifest themselves in susceptibilit…	20-Jul	2022/9/20 11:25	2022/9/20 11:25		442-447		7	20		Nat. Rev. Immunol.								English							Place: Berlin Publisher: Nature Portfolio WOS:000539814700001				sars-cov-2; t-cells; influenza; respiratory syndrome coronavirus; gender; susceptibility; chromosome; ifn-alpha production; mediated response; plasmacytoid dendritic cells
UYSDPYF4	journalArticle	2020	Ghorbani, A.; Zare, F.; Sazegari, S.; Afsharifar, A.; Eskandari, M. H.; Pormohammad, A.	Development of a novel platform of virus-like particle (VLP)-based vaccine against COVID-19 by exposing epitopes: an immunoinformatics approach	New Microbes and New Infections			10.1016/j.nmni.2020.100786		The emergence of a rapidly spreading and highly infectious coronavirus disease 2019 (COVID-19) outbreak by a novel coronavirus, severe acute respiratory syndrome coronavirus 2 (SARS-CoV-2), has caused a global pandemic with unprecedented social and economic dimensions. Therefore, the development of effective strategies is urgent to control the COVID-19 outbreak. According to recent investigations…	20-Nov	2022/9/20 11:25	2022/9/20 11:25		100786			38		New Microbes New Infect.								English							Place: Oxford Publisher: Elsevier Sci Ltd WOS:000613716400032				covid-19; vaccine; virus-like particles; severe acute respiratory syndrome coronavirus 2; coronavirus spike protein; epitope prediction; immunoinformatics
266I6BTG	journalArticle	2020	Wang, Xiaoli; Guo, Xianghua; Xin, Qianqian; Pan, Yang; Hu, Yaling; Li, Jing; Chu, Yanhui; Feng, Yingmei; Wang, Quanyi	Neutralizing Antibody Responses to Severe Acute Respiratory Syndrome Coronavirus 2 in Coronavirus Disease 2019 Inpatients and Convalescent Patients	Clinical Infectious Diseases		1058-4838	10.1093/cid/ciaa721		Background. Coronavirus disease 2019 (COVID-19) is a pandemic with no specific antiviral treatments or vaccines. There is an urgent need for exploring the neutralizing antibodies from patients with different clinical characteristics. Methods. A total of 117 blood samples were collected from 70 COVID-19 inpatients and convalescent patients. Antibodies were determined with a modified cytopathogenic…	2020/11/15	2022/9/20 11:25	2022/9/20 11:25		2688-2694		10	71		Clin. Infect. Dis.								English							Place: Cary Publisher: Oxford Univ Press Inc WOS:000606534600045				covid-19; SARS-CoV-2; sars; neutralizing antibody; convalescent patient
HWIP2AR3	journalArticle	2020	Lockyer, S.	Effects of diets, foods and nutrients on immunity: Implications for COVID-19?	Nutrition Bulletin		1471-9827	10.1111/nbu.12470		The COVID-19 pandemic has sparked an increase in claims that particular food and drink products and nutritional supplements are able to 'boost' immunity. The immune system is highly complex, consisting of many different cell types and processes, and nutritional adequacy is undoubtedly required to support its function. Specific roles have been established for several micronutrients including vitam…	20-Dec	2022/9/20 11:25	2022/9/20 11:25		456-473		4	45		Nutr. Bull.								English							Place: Hoboken Publisher: Wiley WOS:000597631800010				covid-19; inflammation; health; immunity; consensus statement; bmi; micronutrients; gut microbiota; atherosclerotic plaques; deficiencies; fatty-acids; influenza vaccination; international scientific association; long-chain omega-3 fatty acids; prebiotics
ZNFPMKW2	journalArticle	2020	Sy, C. L.; Aviso, K. B.; Cayamanda, C. D.; Chiu, A. S. F.; Lucas, R. I. G.; Promentilla, M. A. B.; Razon, L. F.; Tan, R. R.; Tapia, J. F. D.; Torneo, A. R.; Ubando, A. T.; Yu, D. E. C.	Process integration for emerging challenges: optimal allocation of antivirals under resource constraints	Clean Technologies and Environmental Policy		1618-954X	10.1007/s10098-020-01876-1		The global scientific community has intensified efforts to develop, test, and commercialize pharmaceutical products to deal with the COVID-19 pandemic. Trials for both antivirals and vaccines are in progress; candidates include existing repurposed drugs that were originally developed for other ailments. Once these are shown to be effective, their production will need to be ramped up rapidly to ke…	20-Aug	2022/9/20 11:25	2022/9/20 11:25		1359-1370		6	22		Clean Technol. Environ. Policy								English							Place: New York Publisher: Springer WOS:000542844000003				covid-19; disaster; Sustainable Development Goals; Resource allocation; Disease outbreak; Mathematical programming; Pharmaceutical shortage
54S8ZQWN	journalArticle	2020	Khatri, Indu; Staal, Frank J. T.; van Dongen, Jacques J. M.	Blocking of the High-Affinity Interaction-Synapse Between SARS-CoV-2 Spike and Human ACE2 Proteins Likely Requires Multiple High-Affinity Antibodies: An Immune Perspective	Frontiers in Immunology		1664-3224	10.3389/fimmu.2020.570018		The pandemic of Coronavirus Disease 2019 (COVID-19) caused by SARS-CoV-2 has induced global eagerness to develop vaccines and therapeutics for treating COVID-19, including neutralizing antibodies. To develop effective therapeutic antibodies against SARS-CoV-2, it is critical to understand the interaction between viral and host's proteins. The human ACE2 ((h)ACE2) protein is the crucial target for…	2020/9/17	2022/9/20 11:25	2022/9/20 11:25		570018			11		Front. Immunol.								English							Place: Lausanne Publisher: Frontiers Media Sa WOS:000576360300001				infection; therapy; antibody; virus; ace2; receptor-binding domain; cov; sars coronavirus; SARS-CoV; cats; binding-affinity; felines; hydrogen-bonds; IgA dimer; interaction-synapse; interface
GRXKXQWH	journalArticle	2020	Huang, Mengjiao; Zou, Chuangchao; Liu, Yuan; Han, Zhenling; Xue, Chunyi; Cao, Yongchang	A novel low virulent respiratory infectious bronchitis virus originating from the recombination of QX, TW and 4/91 genotype strains in China	Veterinary Microbiology		0378-1135	10.1016/j.vetmic.2020.108579		In China, variants of infectious bronchitis virus (IBV) evolve continually and diverse recombinant strains have been reported. Here, an IBV strain, designated as ck/CH/LJX/2017/07 (referred as JX17) was isolated from chicken vaccinated with H120 and 4/91 in Jiangxi, China, in 2017. Sequence analysis reveals of the S1 gene of JX17 the highest nucleotide identity of 98.15% with that of GI-7 genotyp…	20-Mar	2022/9/20 11:25	2022/9/20 11:25		108579			242		Vet. Microbiol.								English							Place: Amsterdam Publisher: Elsevier WOS:000521515200013				spike; genome; site; sequence; Infectious bronchitis virus; Recombination; serotypes; s1 gene; coronavirus ibv; 4/91 genotype; QX genotype; TW genotype
NR2TFKKV	journalArticle	2020	Kennedy, David A.; Read, Andrew F.	Monitor for COVID-19 vaccine resistance evolution during clinical trials	Plos Biology		1544-9173	10.1371/journal.pbio.3001000		Although less common than the evolution of antimicrobial drug resistance, vaccine resistance can and has evolved. How likely is it that COVID-19 vaccines currently in development will be undermined by viral evolution? We argue that this can be determined by repurposing samples that are already being collected as part of clinical trials. Such information would be useful for prioritizing investment…	20-Nov	2022/9/20 11:25	2022/9/20 11:25		e3001000		11	18		PLoS. Biol.								English							Place: San Francisco Publisher: Public Library Science WOS:000591833700002
LWR5LHWH	journalArticle	2020	Dalmann, Anja; Reimann, Ilona; Wernike, Kerstin; Beer, Martin	Autonomously Replicating RNAs of Bungowannah Pestivirus: E-RNS Is Not Essential for the Generation of Infectious Particles	Journal of Virology		0022-538X	10.1128/JVI.00436-20		Autonomously replicating subgenomic Bungowannah virus (BuPV) RNAs (BuPV replicons) with deletions of the genome regions encoding the structural proteins C, E-RNS, E1, and E2 were constructed on the basis of an infectious cDNA clone of BuPV. Nanoluciferase (Nluc) insertion was used to compare the replication efficiencies of all constructs after electroporation of in vitro-transcribed RNA from the …	20-Jul	2022/9/20 11:25	2022/9/20 11:25		e00436-20		14	94		J. Virol.								English							Place: Washington Publisher: Amer Soc Microbiology WOS:000550190300008				viral vector; gene-expression; swine-fever virus; replicon; Bungowannah virus; cell-surface; e-rns; foreign gene expression; glycoprotein e-rns; hog-cholera virus; molecular-biology; n-pro; pestivirus; replicon particles; sindbis virus; viral-diarrhea-virus; virus replicon particles
NV9TMEWN	journalArticle	2020	Urban, Szabolcs; Paragi, Gabor; Burian, Katalin; McLean, Gary R.; Virok, Dezso P.	Identification of similar epitopes between severe acute respiratory syndrome coronavirus-2 and Bacillus Calmette-Guerin: potential for cross-reactive adaptive immunity	Clinical & Translational Immunology			10.1002/cti2.1227		Objectives. Bacillus Calmette-Guerin (BCG) vaccination has been implicated in protection against severe acute respiratory syndrome coronavirus-2 (SARS-CoV-2) and as a non-specific immunisation method against the virus. We therefore decided to investigate T-cell and B-cell epitopes within the BCG-Pasteur strain proteome for similarity to immunogenic peptides of SARS-CoV-2. Methods. We used NetMHC …	2020	2022/9/20 11:25	2022/9/20 11:25		e1227		12	9		Clin. Transl. Immunol.								English							Place: Hoboken Publisher: Wiley WOS:000603074000010				covid-19; SARS-CoV-2; 2019-nCoV; bcg; Bacillus Calmette-Guerin
AK8Z7GGJ	journalArticle	2020	Batista, Berlinda; Dickenson, Drew; Gurski, Katharine; Kebe, Malick; Rankin, Naomi	Minimizing disease spread on a quarantined cruise ship: A model of COVID-19 with asymptomatic infections	Mathematical Biosciences		0025-5564	10.1016/j.mbs.2020.108442		On February 5 the Japanese government ordered the passengers and crew on the Diamond Princess to start a two week quarantine after a former passenger tested positive for COVID-19. During the quarantine the virus spread rapidly throughout the ship. By February 20, there were 651 cases. We model this quarantine with a SEIR model including asymptomatic infections with differentiated shipboard roles …	20-Nov	2022/9/20 11:25	2022/9/20 11:25		108442			329		Math. Biosci.								English							Place: New York Publisher: Elsevier Science Inc WOS:000579496700001				covid-19; Reproduction number; transmission; outbreak; influenza; Isolation; respiratory syndrome coronavirus; Quarantine; seir; Asymptomatic; Cruise ship; Flu; Sensitivity
Z85TGDNZ	journalArticle	2020	Nundoochan, Ajoy	Improving public hospital efficiency and fiscal space implications: the case of Mauritius	International Journal for Equity in Health			10.1186/s12939-020-01262-9		Background General Government Health Expenditure (GGHE) in Mauritius accounted for only 10% of General Government Expenditure for the fiscal year 2018. This is less than the pledge taken under the Abuja 2001 Declaration to allocate at least 15% of national budget to the health sector. The latest National Health Accounts also urged for an expansion in the fiscal space for health. As public hospita…	2020/9/4	2022/9/20 11:25	2022/9/20 11:25		152		1	19		Int. J. Equity Health								English							Place: London Publisher: Bmc WOS:000569781500002				health-care; Fiscal space; stochastic frontier analysis; Stochastic frontier analysis; technical efficiency; Technical efficiency
I9K8CF5Y	journalArticle	2020	Bersanelli, Melissa; Zielli, Teresa; Perrone, Fabiana; Casartelli, Chiara; Prattico, Fabiana; Rapacchi, Elena; Camisa, Roberta; Tognetto, Michele; Clemente, Alberto; Giannarelli, Diana; Rebuzzi, Sara Elena; Leonetti, Alessandro; Bordi, Paola; Tiseo, Marcello; Buti, Sebastiano	Clinical impact of COVID-19 in a single-center cohort of a prospective study in cancer patients receiving immunotherapy	Immunotherapy		1750-743X	10.2217/imt-2020-0211		Aim:Evaluating the incidence and course of COVID-19 in cancer patients treated with immunotherapy.Patients & methods:We reported the influenza-like illness events with diagnosis of COVID-19 within the patient cohort enrolled in the prospective observational multicenter INVIDIa-2 study in the single center of Parma.Results:Among 53 patients, eight experienced influenza-like illness during the infl…	20-Oct	2022/9/20 11:25	2022/9/20 11:25		1139-1148		15	12		Immunotherapy								English							Place: London Publisher: Future Medicine Ltd WOS:000569363600001				covid-19; SARS-CoV2; immunotherapy; influenza vaccine; cancer patients; immune checkpoint inhibitors; anti-PD-1; interstitial pneumonia
DY6FNMR7	journalArticle	2020	Wu, Xinxin; Lu, Wei; Guo, Quan; Cao, Min; Zhang, Wen; Liu, Changya; Qu, Yao; Peng, Wei; Che, Jinhua; Fang, Bangjiang; Zhou, Shuang	Novel coronavirus pneumonia (COVID-19) combined with Chinese and Western medicine based on "Internal and External Relieving -Truncated Torsion" strategy	Medicine		0025-7974	10.1097/MD.0000000000023874		Introduction: The outbreak of novel coronavirus disease 2019 (COVID-19) has caused a global pandemic since December 2020. It has not only associated with physiological disorder but also with psychological distress and symptoms of mental illness. Whether the vaccines and antivirals can provide protects remains unknown. Traditional Chinese medicine (TCM) is recommended as an alternative and signifi…	2020/12/18	2022/9/20 11:25	2022/9/20 11:25		e23874		51	99		Medicine (Baltimore)								English							Place: Philadelphia Publisher: Lippincott Williams & Wilkins WOS:000612839600123				covid-19; exterior and interior solutions; prospective cohort study; traditional Chinese medicine; truncated torsion
8Y23ZTR6	journalArticle	2020	Bao, Linlin; Deng, Wei; Huang, Baoying; Gao, Hong; Liu, Jiangning; Ren, Lili; Wei, Qiang; Yu, Pin; Xu, Yanfeng; Qi, Feifei; Qu, Yajin; Li, Fengdi; Lv, Qi; Wang, Wenling; Xue, Jing; Gong, Shuran; Liu, Mingya; Wang, Guanpeng; Wang, Shunyi; Song, Zhiqi; Zhao, Linna; Liu, Peipei; Zhao, Li; Ye, Fei; Wang, Huijuan; Zhou, Weimin; Zhu, Na; Zhen, Wei; Yu, Haisheng; Zhang, Xiaojuan; Guo, Li; Chen, Lan; Wan…	The pathogenicity of SARS-CoV-2 in hACE2 transgenic mice	Nature		0028-0836	10.1038/s41586-020-2312-y		Severe acute respiratory syndrome coronavirus 2 (SARS-CoV-2) is the cause of coronavirus disease 2019 (COVID-19), which has become a public health emergency of international concern(1). Angiotensin-converting enzyme 2 (ACE2) is the cell-entry receptor for severe acute respiratory syndrome coronavirus (SARS-CoV)(2). Here we infected transgenic mice that express human ACE2 (hereafter, hACE2 mice) w…	2020/7/30	2022/9/20 11:25	2022/9/20 11:25		830-+		7818	583		Nature								English							Place: Berlin Publisher: Nature Portfolio WOS:000551400800001				coronavirus; sars
6B8TVD45	journalArticle	2020	Andreato, Leonardo V.; Coimbra, Danilo R.; Andrade, Alexandro	Challenges to Athletes During the Home Confinement Caused by the COVID-19 Pandemic	Strength and Conditioning Journal		1524-1602	10.1519/SSC.0000000000000563		The world is currently facing a serious coronavirus pandemic (COVID-19). This novel coronavirus is a new virus for which effective drugs and vaccines have not yet been developed. Amateur and professional athletic events around the world have been stopped, and teams and athletes have had to adopt social withdrawal measures, interrupting their training and preparation routines for competitions. Giv…	20-Jun	2022/9/20 11:25	2022/9/20 11:25		1月5日		3	42		Strength Cond. J.								English							Place: Philadelphia Publisher: Lippincott Williams & Wilkins WOS:000538877200001				behavior; strategies; health; decision-making; prevention; skills; performance; exercise; physical fitness; sports science
PYZ3HXR7	journalArticle		Sharifi, Hamid; Jahani, Yunes; Mirzazadeh, Ali; Gohari, Milad Ahmadi; Nakhaeizadeh, Mehran; Shokoohi, Mostafa; Eybpoosh, Sana; Tohidinik, Hamid Reza; Mostafavi, Ehsan; Khalili, Davood; Nazari, Seyed Saeed Hashemi; Karamouzian, Mohammad; Haghdoost, Ali Akbar	Estimating COVID-19-Related Infections, Deaths, and Hospitalizations in Iran Under Different Physical Distancing and Isolation Scenarios	International Journal of Health Policy and Management			10.34172/ijhpm.2020.134		Background: Iran is one of the first few countries that was hit hard with the coronavirus disease 2019 (COVID-19) pandemic. We aimed to estimate the total number of COVID-19 related infections, deaths, and hospitalizations in Iran under different physical distancing and isolation scenarios. Methods: We developed a susceptible-exposed-infected/infectious-recovered/removed (SEIR) model, parameteriz…		2022/9/20 11:25	2022/9/20 11:25							Int. J. Health Policy Manag.								English							Place: Kerman Publisher: Kerman Univ Medical Sciences WOS:000720065200001				covid-19; Iran; Isolation; Modeling; Physical Distancing
5EQYEZQX	journalArticle	2020	Nailescu, Corina; Khalid, Myda; Wilson, Amy C.; Amanat, Fatima; Arregui, Samuel; Canas, Jorge; Hooks, Jenaya; Krammer, Florian; Schwaderer, Andrew L.; Hains, David S.	Assessment of Seroconversion to SARS-CoV-2 in a Cohort of Pediatric Kidney Transplant Recipients	Frontiers in Pediatrics		2296-2360	10.3389/fped.2020.601327		Background: The occurrence of the severe acute respiratory syndrome coronavirus 2 (SARS-CoV-2) and the associated coronavirus disease 2019 (COVID-19) have profoundly affected adult kidney disease patients. In contrast, pediatric solid organ transplant recipients, including pediatric kidney transplant (KT) recipients, do not seem to be at particularly higher risk for SARS-CoV-2 infection or for se…	2020/10/30	2022/9/20 11:25	2022/9/20 11:25		601327			8		Front. Pediatr.								English							Place: Lausanne Publisher: Frontiers Media Sa WOS:000588670600001				covid-19; pandemic; SARS-CoV-2; infection; pediatric; seroconversion; coronavirus; children; transplant; kidney
9HQSSF7C	journalArticle	2020	Imai, Masaki; Iwatsuki-Horimoto, Kiyoko; Hatta, Masato; Loeber, Samantha; Halfmann, Peter J.; Nakajima, Noriko; Watanabe, Tokiko; Ujie, Michiko; Takahashi, Kenta; Ito, Mutsumi; Yamada, Shinya; Fan, Shufang; Chiba, Shiho; Kuroda, Makoto; Guan, Lizheng; Takada, Kosuke; Armbrust, Tammy; Balogh, Aaron; Furusawa, Yuri; Okuda, Moe; Ueki, Hiroshi; Yasuhara, Atsuhiro; Sakai-Tagawa, Yuko; Lopes, Tiago J. …	Syrian hamsters as a small animal model for SARS-CoV-2 infection and countermeasure development	Proceedings of the National Academy of Sciences of the United States of America		0027-8424	10.1073/pnas.2009799117		At the end of 2019, a novel coronavirus (severe acute respiratory syndrome coronavirus 2; SARS-CoV-2) was detected in Wuhan, China, that spread rapidly around the world, with severe conse-quences for human health and the global economy. Here, we assessed the replicative ability and pathogenesis of SARS-CoV-2 isolates in Syrian hamsters. SARS-CoV-2 isolates replicated effi-ciently in the lungs of …	2020/7/14	2022/9/20 11:25	2022/9/20 11:25		16587-16595		28	117		Proc. Natl. Acad. Sci. U. S. A.								English							Place: Washington Publisher: Natl Acad Sciences WOS:000553288300012				covid-19; SARS-CoV-2; infection; sars; replication; ace2; respiratory syndrome coronavirus; countermeasure; Syrian hamsters
L5C6BVZX	journalArticle	2020	Vieira de Souza, Claudia Teresa; de Santana, Clarke Silva; Ferreira, Patricia; Nunes, Joao Arriscado; Benamor Teixeira, Maria de Lourdes; Fragoso da Silveira Gouvea, Maria Isabel	Caring in the age of COVID-19: lessons from science and society	Cadernos De Saude Publica		0102-311X	10.1590/0102-311X00115020		This paper focuses on our research and intervention in health promotion with patients and communities affected by various infectious diseases, in the project Knowledge-Sharing Platform. This project is developed at the National Institute of Infectious Diseases Evandro Chagas in the Oswaldo Cruz Foundation, Rio de Janeiro, Brazil, and promotes the continuing involvement of health researchers and p…	2020	2022/9/20 11:25	2022/9/20 11:25		e00115020		6	36		Cad. Saude Publica								English							Place: Rio De Janiero Publisher: Cadernos Saude Publica WOS:000546649700001				covid-19; Citizen Participation in Science and Technology; Health Promotion; Social Isolation
PHB9TKEE	journalArticle	2020	Aktug, Zait Burak; Demir, Nazlim Aktug	An Exercise Prescription for COVID-19 Pandemic	Pakistan Journal of Medical Sciences		1682-024X	10.12669/pjms.36.7.2929		COVID-19 is an alarming public health concern worldwide. COVID-19 is highly contagious and has no approved treatment or vaccine yet. Therefore, the best strategy is prevention. Studies have shown that a healthy lifestyle, regular exercise, balanced eating, and quality sleep are the key elements for protection from this disease. We are going through a distressful period as a nation and as the huma…	20-Dec	2022/9/20 11:25	2022/9/20 11:25		1732-1736		7	36		Pak. J. Med. Sci.								English							Place: Saddar Publisher: Professional Medical Publications WOS:000580048400054				covid-19; impact; metaanalysis; prevention; anxiety; depression; hypertension; Health; physical-activity; cardiorespiratory fitness; Exercise prescription; moderate-intensity exercise
GI5RGGI9	journalArticle	2020	Nemchand, Priyanka; Tahir, Hassan; Mediwake, Rapti; Lee, Jeffrey	Cytokine storm and use of anakinra in a patient with COVID-19	Bmj Case Reports			10.1136/bcr-2020-237525		We present a case of a 50-year-old man with COVID-19 infection and acute respiratory distress syndrome as a result of a cytokine storm and use of anakinra, an interleukin 1-receptor antagonist that is normally used in the treatment of autoinflammatory disorders in adult patients. We saw a reduction in oxygen requirement and improvements in inflammatory markers and ferritin. Although we cannot det…	20-Sep	2022/9/20 11:25	2022/9/20 11:25		e237525		9	13		BMJ Case Rep.								English							Place: London Publisher: Bmj Publishing Group WOS:000661540300175				infectious diseases; infections; immunological products and vaccines; immunology; interleukin-1; musculoskeletal and joint disorders
FBNA4SWN	journalArticle	2020	Robbiani, Davide F.; Gaebler, Christian; Muecksch, Frauke; Lorenzi, Julio C. C.; Wang, Zijun; Cho, Alice; Agudelo, Marianna; Barnes, Christopher O.; Gazumyan, Anna; Finkin, Shlomo; Hagglof, Thomas; Oliveira, Thiago Y.; Viant, Charlotte; Hurley, Arlene; Hoffmann, Hans-Heinrich; Millard, Katrina G.; Kost, Rhonda G.; Cipolla, Melissa; Gordon, Kristie; Bianchini, Filippo; Chen, Spencer T.; Ramos, Vic…	Convergent antibody responses to SARS-CoV-2 in convalescent individuals	Nature		0028-0836	10.1038/s41586-020-2456-9		During the coronavirus disease-2019 (COVID-19) pandemic, severe acute respiratory syndrome-related coronavirus-2 (SARS-CoV-2) has led to the infection of millions of people and has claimed hundreds of thousands of lives. The entry of the virus into cells depends on the receptor-binding domain (RBD) of the spike (S) protein of SARS-CoV-2. Although there is currently no vaccine, it is likely that a…	2020/8/20	2022/9/20 11:25	2022/9/20 11:25		437-+		7821	584		Nature								English							Place: Berlin Publisher: Nature Portfolio WOS:000556238800001				neutralizing antibodies; sars coronavirus; broad; b-cells
I7KMSB84	journalArticle	2020	Ling, Chen; Wen, Xianjie	Community grid management is an important measure to contain the spread of novel coronavirus pneumonia (COVID-19)	Epidemiology and Infection		0950-2688	10.1017/S0950268820001739		The outbreak of novel coronavirus pneumonia (coronavirus disease 2019 (COVID-19)), declared as a 'global pandemic' by the World Health Organization (WHO), is a public health emergency of international concern (PHEIC). The outbreak in multiple locations shows a trend of accelerating spread around the world. China has taken a series of powerful measures to contain the spread of the novel coronaviru…	2020	2022/9/20 11:25	2022/9/20 11:25		e167			148		Epidemiol. Infect.								English							Place: New York Publisher: Cambridge Univ Press WOS:000568069700001				covid-19
Y5YJNY2S	journalArticle	2020	Aghababaeian, Hamidreza; Hamdanieh, Lara; Ostadtaghizadeh, Abbas	Alcohol intake in an attempt to fight COVID-19: A medical myth in Iran	Alcohol		0741-8329	10.1016/j.alcohol.2020.07.006		The coronavirus disease 2019 (COVID-19) spread rapidly worldwide and led to the deaths of thousands of people. To date, there is not any vaccine or specific antiviral medicine that can prevent or treat this virus. This caused panic among people who try their best to prevent being infected. In Iran, methanol poisoning was reported and led to the death of hundreds of people in several provinces. Th…	20-Nov	2022/9/20 11:25	2022/9/20 11:25		29-32			88		Alcohol								English							Place: New York Publisher: Elsevier Science Inc WOS:000571479200003				covid-19; Iran; Alcohol poisoning; Methanol
B7PG5QKR	journalArticle	2020	Choudhry, Namrta; Zhao, Xin; Xu, Dan; Zanin, Mark; Chen, Weisan; Yang, Zifeng; Chen, Jianxin	Chinese Therapeutic Strategy for Fighting COVID-19 and Potential Small-Molecule Inhibitors against Severe Acute Respiratory Syndrome Coronavirus 2 (SARS-CoV-2)	Journal of Medicinal Chemistry		0022-2623	10.1021/acs.jmedchem.0c00626		The coronavirus disease 2019 (COVID-19) caused by severe acute respiratory syndrome coronavirus 2 (SARS-CoV-2) has led to more than 20 million people infected worldwide with an average mortality rate of 3.6%. This virus poses major challenges to public health, as it not only is highly contagious but also can be transmitted by asymptomatic infected individuals. COVID-19 is clinically difficult to …	2020/11/25	2022/9/20 11:25	2022/9/20 11:25		13205-13227		22	63		J. Med. Chem.								English							Place: Washington Publisher: Amer Chemical Soc WOS:000595545900002				identification; virus-infection; replication; ebola-virus; cov; papain-like protease; sars coronavirus; natural compounds; antiviral activity; traditional chinese
28WJ52CT	journalArticle	2021	Caruso, Arnaldo; Caccuri, Francesca; Bugatti, Antonella; Zani, Alberto; Vanoni, Marco; Bonfanti, Paolo; Cazzaniga, Marina E.; Perno, Carlo F.; Messa, Cristina; Alberghina, Lilia	Methotrexate inhibits SARS-CoV-2 virus replication "in vitro"	Journal of Medical Virology		0146-6615	10.1002/jmv.26512		In early 2020 the new respiratory syndrome COVID-19 (caused by the zoonotic SARS-CoV-2 virus) spread like a pandemic, starting from Wuhan, China, causing severe economic depression. Despite some advances in drug treatments of medical complications in the later stages of the disease, the pandemic's death toll is tragic, as no vaccine or specific antiviral treatment is currently available. By using…	21-Mar	2022/9/20 11:25	2022/9/20 11:25		1780-1785		3	93		J. Med. Virol.								English							Place: Hoboken Publisher: Wiley WOS:000573059100001				covid-19; methotrexate; drug repurposing; purine biosynthesis inhibition
YW2FZESF	journalArticle	2020	Poran, Asaf; Harjanto, Dewi; Malloy, Matthew; Arieta, Christina M.; Rothenberg, Daniel A.; Lenkala, Divya; van Buuren, Marit M.; Addona, Terri A.; Rooney, Michael S.; Srinivasan, Lakshmi; Gaynor, Richard B.	Sequence-based prediction of SARS-CoV-2 vaccine targets using a mass spectrometry-based bioinformatics predictor identifies immunogenic T cell epitopes	Genome Medicine		1756-994X	10.1186/s13073-020-00767-w		Background The ongoing COVID-19 pandemic has created an urgency to identify novel vaccine targets for protective immunity against SARS-CoV-2. Early reports identify protective roles for both humoral and cell-mediated immunity for SARS-CoV-2. Methods We leveraged our bioinformatics binding prediction tools for human leukocyte antigen (HLA)-I and HLA-II alleles that were developed using mass spectr…	2020/8/13	2022/9/20 11:25	2022/9/20 11:25		70		1	12		Genome Med.								English							Place: London Publisher: Bmc WOS:000562817700001				covid-19; responses; antibodies; pneumonia; protein; model; acute respiratory syndrome; protective immunity; sars coronavirus; Computational biology; HLA-I binding prediction; HLA-II binding prediction; SARS-CoV-2 T cell epitopes; T cell assay; Vaccine design
R4L36I4C	journalArticle	2020	Mullbacher, Arno; Pardo, Julian; Furuya, Yoichi	SARS-CoV-2 Vaccines: Inactivation by Gamma Irradiation for T and B Cell Immunity	Pathogens			10.3390/pathogens9110928		Despite accumulating preclinical data demonstrating a crucial role of cytotoxic T cell immunity during viral infections, ongoing efforts on developing COVID-19 vaccines are mostly focused on antibodies. In this commentary article, we discuss potential benefits of cytotoxic T cells in providing long-term protection against COVID-19. Further, we propose that gamma-ray irradiation, which is a previo…	20-Nov	2022/9/20 11:25	2022/9/20 11:25		928		11	9		Pathogens								English							Place: Basel Publisher: Mdpi WOS:000594411900001				covid-19; SARS-CoV-2; safety; virus; dna vaccine; Gamma-ray irradiated vaccine
V8PMPLIG	journalArticle	2020	Sun, Shi-Hui; Chen, Qi; Gu, Hong-Jing; Yang, Guan; Wang, Yan-Xiao; Huang, Xing-Yao; Liu, Su-Su; Zhang, Na-Na; Li, Xiao-Feng; Xiong, Rui; Guo, Yan; Deng, Yong-Qiang; Huang, Wei-Jin; Liu, Quan; Liu, Quan-Ming; Shen, Yue-Lei; Zhou, Yong; Yang, Xiao; Zhao, Tong-Yan; Fan, Chang-Fa; Zhou, Yu-Sen; Qin, Cheng-Feng; Wang, You-Chun	A Mouse Model of SARS-CoV-2 Infection and Pathogenesis	Cell Host & Microbe		1931-3128	10.1016/j.chom.2020.05.020		Since December 2019, a novel coronavirus SARS-CoV-2 has emerged and rapidly spread throughout the world, resulting in a global public health emergency. The lack of vaccine and antivirals has brought an urgent need for an animal model. Human angiotensin-converting enzyme II (ACE2) has been identified as a functional receptor for SARS-CoV-2. In this study, we generated a mouse model expressing huma…	2020/7/8	2022/9/20 11:25	2022/9/20 11:25		124-+		1	28		Cell Host Microbe								English							Place: Cambridge Publisher: Cell Press WOS:000548935100016				transmission; pneumonia; virus; wuhan; syndrome coronavirus infection
U84JX845	journalArticle	2020	Graham, Simon P.; McLean, Rebecca K.; Spencer, Alexandra J.; Belij-Rammerstorfer, Sandra; Wright, Daniel; Ulaszewska, Marta; Edwards, Jane C.; Hayes, Jack W. P.; Martini, Veronica; Thakur, Nazia; Conceicao, Carina; Dietrich, Isabelle; Shelton, Holly; Waters, Ryan; Ludi, Anna; Wilsden, Ginette; Browning, Clare; Bialy, Dagmara; Bhat, Sushant; Stevenson-Leggett, Phoebe; Hollinghurst, Philippa; Gilbr…	Evaluation of the immunogenicity of prime-boost vaccination with the replication-deficient viral vectored COVID-19 vaccine candidate ChAdOx1 nCoV-19	Npj Vaccines			10.1038/s41541-020-00221-3		Clinical development of the COVID-19 vaccine candidate ChAdOx1 nCoV-19, a replication-deficient simian adenoviral vector expressing the full-length SARS-CoV-2 spike (S) protein was initiated in April 2020 following non-human primate studies using a single immunisation. Here, we compared the immunogenicity of one or two doses of ChAdOx1 nCoV-19 in both mice and pigs. Whilst a single dose induced a…	2020/7/27	2022/9/20 11:25	2022/9/20 11:25		69		1	5		npj Vaccines								English							Place: Berlin Publisher: Nature Research WOS:000552727000001				models
UV6JYJ94	journalArticle	2020	Geier, Mark R.; Geier, David A.	Respiratory conditions in coronavirus disease 2019 (COVID-19): Important considerations regarding novel treatment strategies to reduce mortality	Medical Hypotheses		0306-9877	10.1016/j.mehy.2020.109760		A novel virus named 2019 novel coronavirus (2019-nCoV/SARS-CoV-2) causes symptoms that are classified as coronavirus disease (COVID-19). Respiratory conditions are extensively described among more serious cases of COVID-19, and the onset of acute respiratory distress syndrome (ARDS) is one of the hallmark features of critical COVID-19 cases. ARDS can be directly life-threatening because it is ass…	20-Jul	2022/9/20 11:25	2022/9/20 11:25		109760			140		Med. Hypotheses								English							Place: Edinburgh Publisher: Churchill Livingstone WOS:000540720800053				SARS-CoV-2; blood; transfusion; 2019-nCoV; Pulmonary; epo; erythropoietin; oxygenation; tissue
7T4LUNL8	journalArticle	2020	Oti, Victor Baba; Ioannou, Marina	Traveler's Infections: Understanding SARS-CoV-2 as a Potential Agent	Kesmas-National Public Health Journal		1907-7505	10.21109/kesmas.v15i2.3974		Coronavirus disease 2019 (COVID-19) has become a major, global, public health challenge. Over 1,051,635 confirmed cases have been reported worldwide, and both local and international travelers are considered to represent populations at high risk of acquiring the infection. Many factors are involved in the spread of this viral agent, including travel to and from endemic areas, a history of contact…	2020	2022/9/20 11:25	2022/9/20 11:25		63-68		2	15		Kesmas								English							Place: Depok Publisher: Univ Indonesia WOS:000557024200013				covid-19; coronavirus; spike; outbreak; incidence rate ratio; social restriction; time series analysis
SLVS4PUF	journalArticle	2020	Ergonenc, Tolga; Hacibekiroglu, Tuba	New coronavirus disease (COVID-19): A perspective from Turkey	Anaesthesia Pain & Intensive Care		1607-8322	10.35975/apic.v24i2.1250		The new coronavirus (COVID-19), which causes severe respiratory diseases such as pneumonia and lung failure, is spreading Since December 2019, across the globe from China rapidly. While global institutions and companies have focused on developing vaccines for the prevention of COVID-19, no specific vaccine has yet been found. In this perspective review, we highlight the current status of epidemio…	20-Apr	2022/9/20 11:25	2022/9/20 11:25		132-137		2	24		Anaesth. Pain Intensive Care								English							Place: Islamabad Publisher: Anaesthesia Pain & Intensive Care WOS:000543514500003				covid-19; Coronavirus; pneumonia; outbreak; convalescent plasma; wuhan; respiratory syndrome coronavirus
PP3DFAZD	journalArticle	2020	Pratomo, Hadi	From Social Distancing to Physical Distancing: A Challenge for Evaluating Public Health Intervention against COVID-19	Kesmas-National Public Health Journal		1907-7505	10.21109/kesmas.v15i2.4010		The coronavirus disease 2019 (COVID-19) pandemic has affected every country. Currently, no suitable vaccine or treatment has been identified; therefore, each country has attempted to issue appropriate policies, designed to reduce and prevent increases in the numbers of extreme cases. Transmission can be prevented by implementing social restrictions, also known as social distancing. The World Heal…	2020	2022/9/20 11:25	2022/9/20 11:25		60-62		2	15		Kesmas								English							Place: Depok Publisher: Univ Indonesia WOS:000557024200012				covid-19; social distance; physical distance
CXMJ8GSS	journalArticle	2020	Mishra, Pushpendra Mani; Uversky, Vladimir N.; Nandi, Chayan K.	Serum albumin-mediated strategy for the effective targeting of SARS-CoV-2	Medical Hypotheses		0306-9877	10.1016/j.mehy.2020.109790		Novel coronavirus (NCoV-19), also known as SARS CoV-2, is a pathogen causing an emerging infection that rapidly increases in incidence and geographic range, is associated with the ever-increasing morbidity and mortality rates, and shows sever economic impact worldwide. The WHO declares the NCoV-19 infection disease (COVID-19) a Public Health Emergency of International Concern on 30 January 2020 a…	20-Jul	2022/9/20 11:25	2022/9/20 11:25		109790			140		Med. Hypotheses								English							Place: Edinburgh Publisher: Churchill Livingstone WOS:000540720800055				covid-19; virus-infection; SARS CoV-2; curcumin; Antiviral drug; Treatment strategy
2QI2LRU5	journalArticle	2020	Kim, Wooil; Lee, Hyubjin; Chung, Yon Dohn	Safe contact tracing for COVID-19: A method without privacy breach using functional encryption techniques based-on spatio-temporal trajectory data	Plos One		1932-6203	10.1371/journal.pone.0242758		The COVID-19 pandemic has spread all over the globe. In the absence of a vaccine, a small number of countries have managed to control the diffusion of viruses by early detection and early quarantine. South Korea, one of the countries which have kept the epidemics well-controlled, has opened the infected patients' trajectory to the public. Such a reaction has been regarded as an effective method, …	2020/12/11	2022/9/20 11:25	2022/9/20 11:25		e0242758		12	15		PLoS One								English							Place: San Francisco Publisher: Public Library Science WOS:000600144200071
GZNKCAPU	journalArticle	2020	Thangaraju, Pugazhenthan; Gurunthalingam, Meenalotchini; Varthya, Shobanbabu; Venkatesan, Sajitha; Thangaraju, Eswaran	COVID-19: Older drugs for a novel disease-Chloroquine, hydroxychloroquine, and possible Pentoxifylline-set to start the second innings?	Journal of Family Medicine and Primary Care		2249-4863	10.4103/jfmpc.jfmpc_422_20		Currently no drug is approved for the prophylaxis and management of COVID 19. Lots of activities on vaccine and trials with drugs are underway. Some evidence have shown positive results using older established drug in the management of severe cases. We are also of same view and opinion to adopt some emergency measure by pharmacological intervention till a newer drug available in the market.	20-May	2022/9/20 11:25	2022/9/20 11:25		2172-2175		5	9		J. Fam. Med. Prim. Care								English							Place: Mumbai Publisher: Wolters Kluwer Medknow Publications WOS:000648436300005				covid-19; coronavirus; virus-infection; in-vitro; antiviral activity; Chloroquine; oseltamavir; pentoxifylline
RIQLEGL9	journalArticle	2021	Kraaijeveld, Steven R.	COVID-19: Against a Lockdown Approach	Asian Bioethics Review		1793-8759	10.1007/s41649-020-00154-y		Governments around the world have faced the challenge of how to respond to the recent outbreak of a novel coronavirus disease (COVID-19). Some have reacted by greatly restricting the freedom of citizens, while others have opted for less drastic policies. In this paper, I draw a parallel with vaccination ethics to conceptualize two distinct approaches to COVID-19 that I call altruistic and lockdow…	21-Jun	2022/9/20 11:25	2022/9/20 11:25		195-212		2	13		Asian Bioeth. Rev.								English							Place: New York Publisher: Springer WOS:000592627800001				covid-19; behavior; Lockdown; Altruism; Public health ethics; Freedom; Justice; meaningful life
CI4D5DSU	journalArticle	2020	Kar, Tamalika; Narsaria, Utkarsh; Basak, Srijita; Deb, Debashrito; Castiglione, Filippo; Mueller, David M.; Srivastava, Anurag P.	A candidate multi-epitope vaccine against SARS-CoV-2	Scientific Reports		2045-2322	10.1038/s41598-020-67749-1		In the past two decades, 7 coronaviruses have infected the human population, with two major outbreaks caused by SARS-CoV and MERS-CoV in the year 2002 and 2012, respectively. Currently, the entire world is facing a pandemic of another coronavirus, SARS-CoV-2, with a high fatality rate. The spike glycoprotein of SARS-CoV-2 mediates entry of virus into the host cell and is one of the most important…	2020/7/2	2022/9/20 11:25	2022/9/20 11:25				1	10		Sci Rep								English							Place: Berlin Publisher: Nature Research WOS:000550002500003				coronavirus; t-cells; protein-structure; web server; peptide vaccine; recent insights; toll-like receptors; toxin-b-subunit; harnessing bioinformatics; i-tasser
UQP872H7	journalArticle	2020	Ray, Isha	Viewpoint - Handwashing and COVID-19: Simple, right there ... ?	World Development		0305-750X	10.1016/j.worlddev.2020.105086		COVID-19 is a disease with no proven pharmaceutical intervention and no proven vaccine. In such circumstances, prevention is all we have. The role of handwashing in the prevention of communicable diseases has been known for over a century, yet it remains severely neglected as a public health investment, to be periodically re-discovered during pandemic-scale infections. Over 26% of the global popu…	20-Nov	2022/9/20 11:25	2022/9/20 11:25		105086			135		World Dev.								English							Place: Oxford Publisher: Pergamon-Elsevier Science Ltd WOS:000564711800026				health; water
SEYZYAZ8	journalArticle	2020	Lu, Maolin; Uchil, Pradeep D.; Li, Wenwei; Zheng, Desheng; Terry, Daniel S.; Gorman, Jason; Shi, Wei; Zhang, Baoshan; Zhou, Tongqing; Ding, Shilei; Gasser, Romain; Prevost, Jeremie; Beaudoin-Bussieres, Guillaume; Anand, Sai Priya; Laumaea, Annemarie; Grover, Jonathan R.; Liu, Lihong; Ho, David D.; Mascola, John R.; Finzi, Andres; Kwong, Peter D.; Blanchard, Scott C.; Mothes, Walther	Real-Time Conformational Dynamics of SARS-CoV-2 Spikes on Virus Particles	Cell Host & Microbe		1931-3128	10.1016/j.chom.2020.11.001		The severe acute respiratory syndrome coronavirus 2 (SARS-CoV-2) spike (S) mediates viral entry into cells and is critical for vaccine development against coronavirus disease 2019 (COVID-19). Structural studies have revealed distinct conformations of S, but real-time information that connects these structures is lacking. Here we apply single-molecule fluorescence (Forster) resonance energy transf…	2020/12/9	2022/9/20 11:25	2022/9/20 11:25		880-+		6	28		Cell Host Microbe								English							Place: Cambridge Publisher: Cell Press WOS:000597360400014				site; respiratory syndrome coronavirus; proteins; surface; molecule
JCDD7598	journalArticle	2020	Seghatchian, Jerard; Acker, Jason P.; Putter, Jeffery S.	Update on newer approaches to prevent or treat COVID-19 infection: What we all need the most right now!!	Transfusion and Apheresis Science		1473-0502	10.1016/j.transci.2020.102933		COVID-19 convalescent plasma (CCP) therapy involves the use of circulating antibodies administration from recovered COVID 19 patients as a practical strategy to provide immediate passive immunity in susceptible recipients in need. Global concern over the potential for "second" or "third" waves of infection to occur before effective vaccines or drug therapies are available has many looking at othe…	20-Oct	2022/9/20 11:25	2022/9/20 11:25		102933		5	59		Transfus. Apher. Sci.								English							Place: Oxford Publisher: Pergamon-Elsevier Science Ltd WOS:000594183900033				covid-19; SARS-CoV-2; Neutralizing antibodies; Convalescent plasma
JHDZ4TJ2	journalArticle	2020	Asandei, Alina; Mereuta, Loredana; Schiopu, Irina; Park, Jonggwan; Seo, Chang Ho; Park, Yoonkyung; Luchian, Tudor	Non-Receptor-Mediated Lipid Membrane Permeabilization by the SARS-CoV-2 Spike Protein S1 Subunit	Acs Applied Materials & Interfaces		1944-8244	10.1021/acsami.0c17044		Due to the pressing need to generate specific drugs or vaccines for COVID-19 and management of its outbreak, detailed knowledge regarding the SARS-CoV-2 entry into host cells and timely, cheap, and easy-to-use detection methods are of critical importance for containing the SARS-CoV-2 epidemic. Through electrophysiology and fluorescence spectroscopy experiments, we show that even in the absence of…	2020/12/16	2022/9/20 11:25	2022/9/20 11:25		55649-55658		50	12		ACS Appl. Mater. Interfaces								English							Place: Washington Publisher: Amer Chemical Soc WOS:000600202300011				antibody; neutralizing antibodies; binding; ace2; rapid detection; complexes; translocation; alpha-hemolysin; analog; electrophysiology; lipid membranes; molecules; nanopore; nanopore detection; receptor-binding subunit; SARS-CoV-2 S1
FFULI9EI	journalArticle	2021	Jain, Rachna; Gupta, Meenu; Taneja, Soham; Hemanth, D. Jude	Deep learning based detection and analysis of COVID-19 on chest X-ray images	Applied Intelligence		0924-669X	10.1007/s10489-020-01902-1		Covid-19 is a rapidly spreading viral disease that infects not only humans, but animals are also infected because of this disease. The daily life of human beings, their health, and the economy of a country are affected due to this deadly viral disease. Covid-19 is a common spreading disease, and till now, not a single country can prepare a vaccine for COVID-19. A clinical study of COVID-19 infect…	21-Mar	2022/9/20 11:25	2022/9/20 11:25		1690-1700		3	51		Appl. Intell.								English							Place: Dordrecht Publisher: Springer WOS:000578400200001				infection; pneumonia; china; Covid-19; acute respiratory syndrome; ct; cnn; Chest X-ray images; Deep-learning; Inception net 3; ResNeXt; XCeption
99H8WUPK	journalArticle	2020	Guan, Xueting; Li, Hua; Han, Meijing; Jia, Shuo; Feng, Baohua; Gao, Xuwen; Wang, Zhuo; Jiang, Yanping; Cui, Wen; Wang, Li; Xu, Yigang	Epidemiological investigation of feline infectious peritonitis in cats living in Harbin, Northeast China from 2017 to 2019 using a combination of an EvaGreen-based real-time RT-PCR and serum chemistry assays	Molecular and Cellular Probes		0890-8508	10.1016/j.mcp.2019.101495		Feline infectious peritonitis (FIP) is caused by the FIP virus (FIPV), a highly virulent mutant form of feline coronavirus (FCoV). This disease is one of the most important infectious diseases in cats, and it is associated with high mortality, particularly among younger cats. In this study, we isolated a wild-type FIPV HRB-17 epidemic strain from the blood sample of household pet cat exhibiting t…	20-Feb	2022/9/20 11:25	2022/9/20 11:25		101495			49		Mol. Cell. Probes								English							Place: London Publisher: Academic Press Ltd- Elsevier Science Ltd WOS:000510110100016				coronavirus; virus; strains; update; tissues; Epidemiological survey; EvaGreen-based real-time 12T-PCR; Feline infectious peritonitis virus; Hyperglobulinemia; N gene
A3X7U9RC	journalArticle	2020	Pereira, Marcos; Paixao, Enny; Trajman, Anete; de Souza, Ramon Andrade; da Natividade, Marcio Santos; Pescarini, Julia M.; Pereira, Susan Martins; Barreto, Florisneide Rodrigues; Ximenes, Ricardo; Dalcomo, Margareth; Ichihara, Maria Yury; Nunes, Ceuci; Barral-Netto, Manoel; Barreto, Mauricio L.	The need for fast-track, high-quality and low-cost studies about the role of the BCG vaccine in the fight against COVID-19	Respiratory Research			10.1186/s12931-020-01439-4		Bacillus Calmette-Guerin (BCG) vaccination is routine and near-universal in many low- and middle-income countries (LMIC). It has been suggested that BCG can have a protective effect on COVID-19 morbidity and mortality. This commentary discusses the limitations of the evidence around BCG and COVID-19. We argue that higher-quality evidence is necessary to understand the protective effect of the BCG…	2020/7/11	2022/9/20 11:25	2022/9/20 11:25		178		1	21		Respir. Res.								English							Place: London Publisher: Bmc WOS:000552046800001				infection
NZRKK2MB	journalArticle	2020	Good, Michael F.; Hawkes, Michael T.	The Interaction of Natural and Vaccine-Induced Immunity with Social Distancing Predicts the Evolution of the COVID-19 Pandemic	Mbio		2150-7511	10.1128/mBio.02617-20		The existence and nature of immunity to severe acute respiratory syndrome coronavirus 2 (SARS-CoV-2) are currently unknown; however, neutralizing antibodies are thought to play the major role and data from studying other coronaviruses suggest that partial clinical immunity lasting up to 1 year will occur postinfection. We show how immunity, depending on its durability, may work with current socia…	20-Oct	2022/9/20 11:25	2022/9/20 11:25		e02617-20		5	11		mBio								English							Place: Washington Publisher: Amer Soc Microbiology WOS:000680958400013				covid-19; SARS-CoV-2; responses; coronavirus; disease; vaccines; public health; model; immunity; wuhan
HFWR2Z9X	journalArticle	2020	Ali, Khawla F.; Whitebridge, Simon; Jamal, Mohammad H.; Alsafy, Mohammad; Atkin, Stephen L.	Perceptions, Knowledge, and Behaviors Related to COVID-19 Among Social Media Users: Cross-Sectional Study	Journal of Medical Internet Research		1438-8871	10.2196/19913		Background: Social media is one of the most rapid and impactful ways of obtaining and delivering information in the modern era. Objective: The aim of this study was to rapidly obtain information on public perceptions, knowledge, and behaviors related to COVID-19 in order to identify deficiencies in key areas of public education. Methods: Using a cross-sectional study design, a survey web link was…	2020/9/8	2022/9/20 11:25	2022/9/20 11:25		e19913		9	22		J. Med. Internet Res.								English							Place: Toronto Publisher: Jmir Publications, Inc WOS:000599142300001				covid-19; knowledge; public health; virus; social media; perception; health information; health education
QNMZZ2DB	journalArticle	2021	Rothan, Hussin A.; Byrareddy, Siddappa N.	The potential threat of multisystem inflammatory syndrome in children during the COVID-19 pandemic	Pediatric Allergy and Immunology		0905-6157	10.1111/pai.13361		Multisystem inflammatory syndrome in children (MIS-C) during the COVID-19 pandemic raised a global alert from the Centers for Disease Control and Prevention's Health Alert Network. The main manifestations of MIS-C (also known as pediatric MIS (PMTS)) in the setting of a severe inflammatory state include fever, diarrhea, shock, and variable presence of rash, conjunctivitis, extremity edema, and mu…	21-Jan	2022/9/20 11:25	2022/9/20 11:25		17-22		1	32		Pediatr. Allergy Immunol.								English							Place: Hoboken Publisher: Wiley WOS:000578709300001				covid-19; SARS-CoV-2; infection; coronavirus; antibodies; cells; challenge; pathogenesis; antibody-dependent enhancement; Kawasaki syndrome; multisystem inflammatory syndrome
2FIYYB5U	journalArticle	2020	Zhou, Mei; Xiong, Xianzhi	COVID-19 Diagnosed by Serological Antibody Test: A Case Report	Signa Vitae		1334-5605	10.22514/sv.2020.16.0060		The new coronavirus, severe acute respiratory syndrome coronavirus 2 (SARS-CoV-2), first reported in Wuhan, China, is causing a pandemic. With an increased understanding of the disease, the diagnosis and treatment guidelines are being updated and improved. In addition to nucleic acid detection, antibody detection kits are also being developed and approved. A medical worker suspected of having COV…	20-Oct	2022/9/20 11:25	2022/9/20 11:25		195-198		2	16		Signa Vitae								English							Place: Singapore Publisher: Mre Press WOS:000583292400028				covid-19; Case report; Serological antibody test
L6B6BR5D	journalArticle	2020	Mihalopoulos, Meredith; Levine, Alice C.; Marayati, Naoum Fares; Chubak, Barbara M.; Archer, Maddison; Badani, Ketan K.; Tewari, Ashutosh K.; Mohamed, Nihal; Ferrer, Fernando; Kyprianou, Natasha	The Resilient Child: Sex-Steroid Hormones and COVID-19 Incidence in Pediatric Patients	Journal of the Endocrine Society			10.1210/jendso/bvaa106		Coronavirus disease 2019 (COVID-19), a disease caused by Severe Respiratory Syndrome Coronavirus 2 (SARS-CoV-2) infection, has become an unprecedented global health emergency, with fatal outcomes among adults of all ages in the United States, and the highest incidence and mortality in adult men. As the pandemic evolves there is limited understanding of a potential association between symptomatic …	20-Sep	2022/9/20 11:25	2022/9/20 11:25		bvaa106		9	4		J. Endocr. Soc.								English							Place: Washington Publisher: Endocrine Soc WOS:000577507800018				united-states; children; virus; cell entry; expression; polymorphisms; disparities; tmprss2; psychological stress; androgens; immune system; adrenarche; estrogens; prostate-cancer; puberty
43CY3U8Z	journalArticle	2020	Makhoul, Monia; Ayoub, Houssein H.; Chemaitelly, Hiam; Seedat, Shaheen; Mumtaz, Ghina R.; Al-Omari, Sarah; Abu-Raddad, Laith J.	Epidemiological Impact of SARS-CoV-2 Vaccination: Mathematical Modeling Analyses	Vaccines			10.3390/vaccines8040668		This study aims to inform SARS-CoV-2 vaccine development/licensure/decision-making/implementation, using mathematical modeling, by determining key preferred vaccine product characteristics and associated population-level impacts of a vaccine eliciting long-term protection. A prophylactic vaccine with efficacy against acquisition (VES) >= 70% can eliminate the infection. A vaccine with VES <70% ma…	20-Dec	2022/9/20 11:25	2022/9/20 11:25		668		4	8		Vaccines								English							Place: Basel Publisher: Mdpi WOS:000601676700001				covid-19; SARS-CoV-2; vaccine; coronavirus; epidemiology; efficacy; mathematical model; hiv vaccine; risk behavior-change
SK8NJ2KA	journalArticle	2022	Hakmi, Mohammed; Bouricha, E. L. Mehdi; Akachar, Jihane; Lmimouni, Badreddine; El Harti, Jaouad; Belyamani, Lahcen; Ibrahimi, Azeddine	In silico exploration of small-molecule alpha-helix mimetics as inhibitors of SARS-COV-2 attachment to ACE2	Journal of Biomolecular Structure & Dynamics		0739-1102	10.1080/07391102.2020.1830175		The novel coronavirus, SARS-CoV-2, has infected more than 10 million people and caused more than 502,539 deaths worldwide as of June 2020. The explosive spread of the virus and the rapid increase in the number of cases require the immediate development of effective therapies and vaccines as well as accurate diagnosis tools. The pathogenesis of the disease is triggered by the entry of SARS-CoV-2 v…	2022/3/4	2022/9/20 11:25	2022/9/20 11:25		1546-1557		4	40		J. Biomol. Struct. Dyn.								English							Place: Philadelphia Publisher: Taylor & Francis Inc WOS:000575598200001				covid-19; Coronavirus; identification; coronavirus; lessons; spike; sars-cov-2; binding; protein; ace2; treatment; sequence; discovery; virtual screening; MD simulation; energy; alpha-helix mimetics; prody; screening libraries
PLNGWUZ4	journalArticle	2020	Rogers, Thomas F.; Zhao, Fangzhu; Huang, Deli; Beutler, Nathan; Burns, Alison; He, Wan-Ting; Limbo, Oliver; Smith, Chloe; Song, Ge; Woehl, Jordan; Yang, Linlin; Abbott, Robert K.; Callaghan, Sean; Garcia, Elijah; Hurtado, Jonathan; Parren, Mara; Peng, Linghang; Ramirez, Sydney; Ricketts, James; Ricciardi, Michael J.; Rawlings, Stephen A.; Wu, Nicholas C.; Yuan, Meng; Smith, Davey M.; Nemazee, Dav…	Isolation of potent SARS-CoV-2 neutralizing antibodies and protection from disease in a small animal model	Science		0036-8075	10.1126/science.abc7520		Countermeasures to prevent and treat coronavirus disease 2019 (COVID-19) are a global health priority. We enrolled a cohort of severe acute respiratory syndrome coronavirus 2 (SARS-CoV-2)-recovered participants, developed neutralization assays to investigate antibody responses, adapted our high-throughput antibody generation pipeline to rapidly screen more than 1800 antibodies, and established an…	2020/8/21	2022/9/20 11:25	2022/9/20 11:25		956-+		6506	369		Science								English							Place: Washington Publisher: Amer Assoc Advancement Science WOS:000562436800044				virus-infection; spike; monoclonal-antibodies; design
U2GRRW7N	journalArticle	2020	Clipper, Bonnie	The Influence of the COVID-19 Pandemic on Technology: Adoption in Health Care	Nurse Leader		1541-4612	10.1016/j.mnl.2020.06.008		SARS- CoV-2 (coronavirus disease 2019 [COVID-19]) has affected nearly every aspect of our lives. It has certainly changed how we deliver health care. In part, it has accelerated the development and use of technology solutions in health care. These technology tools were originally identified as mechanisms that would make future care easier or better; however, these tech solutions amidst COVID-19 a…	20-Oct	2022/9/20 11:25	2022/9/20 11:25		500-503		5	18		Nurse Lead.								English							Place: New York Publisher: Elsevier Science Inc WOS:000581771000019
54NAJNHR	journalArticle	2020	Nguyen, Hoang Linh; Thai, Nguyen Quoc; Truong, Duc Toan; Li, Mai Suan	Remdesivir Strongly Binds to Both RNA-Dependent RNA Polymerase and Main Protease of SARS-CoV-2: Evidence from Molecular Simulations	Journal of Physical Chemistry B		1520-6106	10.1021/acs.jpcb.0c07312		The outbreak of a new coronavirus SARS-CoV-2 (severe acute respiratory syndrome-coronavirus 2) has caused a global COVID-19 (coronavirus disease 2019) pandemic, resulting in millions of infections and thousands of deaths around the world. There is currently no drug or vaccine for COVID-19, but it has been revealed that some commercially available drugs are promising, at least for treating symptom…	2020/12/17	2022/9/20 11:25	2022/9/20 11:25		11337-11348		50	124		J. Phys. Chem. B								English							Place: Washington Publisher: Amer Chemical Soc WOS:000608855200004				covid-19; virus; complex; affinity; ligand; force; potentials
626UBQ3W	journalArticle	2020	Torkian, Pooya; Ramezani, Naghi; Kiani, Pejman; Bax, Michael R.; Akhlaghpoor, Shahram	Common CT Findings of Novel Coronavirus Disease 2019 (COVID-19): A Case Series	Cureus			10.7759/cureus.7434		Given the highly infectious nature of the coronavirus disease 2019 (COVID-19) virus and the lack of proven specific therapeutic drugs and licensed vaccines effective against it, early diagnosis of the disease is of paramount importance. The common chest CT imaging of confirmed COVID-19 cases is discussed here, which shows ground-glass opacity, crazy paving, and consolidation.	2020/3/27	2022/9/20 11:25	2022/9/20 11:25		e7434		3	12		Cureus								English							Place: Palo Alto Publisher: Cureus Inc WOS:000522247600005				covid-19; chest ct; novel coronavirus; case series; consolidation; crazy paving; ground-glass opacity; radiology; respiratory disease
38RFHWN9	journalArticle	2020	Palmer, Carl L.; Peterson, Rolfe D.	Toxic Mask-ulinity: The Link between Masculine Toughness and Affective Reactions to Mask Wearing in the COVID-19 Era	Politics & Gender		1743-923X	10.1017/S1743923X20000422		The COVID-19 pandemic has altered numerous elements of social, political, and economic life. Mask wearing is arguably an essential component of the new normal until substantial progress is made on a vaccine. However, though evidence suggests the practice is a positive for public health and limiting the transmission of COVID-19, there is variation in attitudes toward and practices of mask wearing.…	20-Dec	2022/9/20 11:25	2022/9/20 11:25		1044-1051		4	16		Polit. Gend.								English							Place: New York Publisher: Cambridge Univ Press WOS:000603966800015				covid-19; norms; affect; masculinity; Sex
MFDKAIPZ	journalArticle	2020	Harrison, Emily A.; Wu, Julia W.	Vaccine confidence in the time of COVID-19	European Journal of Epidemiology		0393-2990	10.1007/s10654-020-00634-3		In the early months of the COVID-19 epidemic, some have wondered if the force of this global experience will solve the problem of vaccine refusal that has vexed and preoccupied the global public health community for the last several decades. Drawing on historical and epidemiological analyses, we critique contemporary approaches to reducing vaccine hesitancy and articulate our notion of vaccine co…	20-Apr	2022/9/20 11:25	2022/9/20 11:25		325-330		4	35		Eur. J. Epidemiol.								English							Place: Dordrecht Publisher: Springer WOS:000528087600001				covid-19; measles; Vaccine hesitancy; public-health; tuberculosis; Vaccine confidence; Culture; Historical; modernization; Vaccine safety regulation
U6KBKDH3	journalArticle	2020	Mondal, Sayantan; Mukherjee, Saumyak; Bagchi, Biman	Mathematical modeling and cellular automata simulation of infectious disease dynamics: Applications to the understanding of herd immunity	Journal of Chemical Physics		0021-9606	10.1063/5.0018807		The complexity associated with an epidemic defies any quantitatively reliable predictive theoretical scheme. Here, we pursue a generalized mathematical model and cellular automata simulations to study the dynamics of infectious diseases and apply it in the context of the COVID-19 spread. Our model is inspired by the theory of coupled chemical reactions to treat multiple parallel reaction pathways…	2020/9/21	2022/9/20 11:25	2022/9/20 11:25		114119		11	153		J. Chem. Phys.								English							Place: Melville Publisher: AIP Publishing WOS:000574548000001				covid-19; vaccination; outbreak; spread; epidemics; networks
HSMBT2IH	journalArticle	2020	Vankadari, Naveen; Jeyasankar, Nandhini Nisha; Lopes, Wilma Jerom	Structure of the SARS-CoV-2 Nsp1/5 '-Untranslated Region Complex and Implications for Potential Therapeutic Targets, a Vaccine, and Virulence	Journal of Physical Chemistry Letters		1948-7185	10.1021/acs.jpclett.0c02818		SARS-CoV-2 is the cause of the ongoing Coronavirus disease 19 (COVID-19) pandemic around the world causing pneumonia and lower respiratory tract infections. In understanding the SARS-CoV-2 pathogenicity and mechanism of action, it is essential to depict the full repertoire of expressed viral proteins. The recent biological studies have highlighted the leader protein Nsp1 of SARS-CoV-2 importance …	2020/11/19	2022/9/20 11:25	2022/9/20 11:25		9659-9668		22	11		J. Phys. Chem. Lett.								English							Place: Washington Publisher: Amer Chemical Soc WOS:000592959100020				nsp1; efficient propagation; host gene-expression
KBAY3FDM	journalArticle	2022	Singh, Jitender; Malik, Deepti; Raina, Ashvinder	Computational investigation for identification of potential phytochemicals and antiviral drugs as potential inhibitors for RNA-dependent RNA polymerase of COVID-19	Journal of Biomolecular Structure & Dynamics		0739-1102	10.1080/07391102.2020.1847688		Since the SARS/MERS epidemic, scientists across the world have been racing to identify the novel-CoVs as it has been predicted that next epidemic can very well be a result from a new mutation of CoV, for which hundred mutations have already been discovered, and the same fear has come true with world facing a raging pandemic due to COVID-19, an infectious disease caused by a newly discovered coron…	2022/5/24	2022/9/20 11:25	2022/9/20 11:25		3492-3507		8	40		J. Biomol. Struct. Dyn.								English							Place: Philadelphia Publisher: Taylor & Francis Inc WOS:000590282600001				prediction; pharmacokinetics; molecular docking; flavonoids; antiviral drugs; multiple sequence alignment; binding pocket; enzyme 2; Phytochemicals; structural activity relationship
8EYK7C3C	journalArticle	2020	Singh, Praveen Kumar; Kulsum, Umay; Rufai, Syed Beenish; Mudliar, S. Rashmi; Singh, Sarman	Mutations in SARS-CoV-2 Leading to Antigenic Variations in Spike Protein: A Challenge in Vaccine Development	Journal of Laboratory Physicians		0974-2727	10.1055/s-0040-1715790		Objectives The spread of severe acute respiratory syndrome coronavirus-2 (SARS-CoV-2) virus has been unprecedentedly fast, spreading to more than 180 countries within 3 months with variable severity. One of the major reasons attributed to this variation is genetic mutation. Therefore, we aimed to predict the mutations in the spike protein (S) of the SARS-CoV-2 genomes available worldwide and anal…	20-Aug	2022/9/20 11:25	2022/9/20 11:25		154-160		2	12		J. Lab. Phys.								English							Place: New York Publisher: Thieme Medical Publ Inc WOS:000565250500003				SARS-CoV-2; coronavirus; fusion; mutations; spike protein; epitopes; antigenicity
T26HUSVY	journalArticle	2020	Ohe, Masashi; Shida, Haruki; Jodo, Satoshi; Kusunoki, Yoshihiro; Seki, Masahide; Furuya, Ken; Goudarzi, Houman	Macrolide treatment for COVID-19: Will this be the way forward?	Bioscience Trends		1881-7815	10.5582/bst.2020.03058		The severe acute respiratory syndrome coronavirus 2 (SARS-CoV-2) pandemic that has developed in late 2019 and 2020 is a serious threat to human health. With no vaccines or drugs approved for prevention and treatment until now, all efforts at drug design and/or clinical trials of already approved drugs are worthy and creditable. Using structure-based drug selection for identification of SARS-CoV-2…	20-Apr	2022/9/20 11:25	2022/9/20 11:25		159-160		2	14		BioSci. Trends								English							Place: Tokyo Publisher: Irca-Bssa WOS:000541534200012				covid-19; SARS-CoV-2; macrolide
XIW6RRWX	journalArticle	2020	Wang, Zhilin; Li, Xuerui; Shang, Youjun; Wu, Jinyan; Dong, Zhen; Cao, Xiaoan; Liu, Yongsheng; Lan, Xi	Rapid differentiation of PEDV wild-type strains and classical attenuated vaccine strains by fluorescent probe-based reverse transcription recombinase polymerase amplification assay	Bmc Veterinary Research			10.1186/s12917-020-02424-1		BackgroundPorcine epidemic diarrhea virus (PEDV), an intestinal coronavirus that causes acute diarrhea and high mortality in suckling piglets, can result in high economic losses in the swine industry. In recent years, despite the use of China's current vaccine immunization strategy, multiple types of PEDV strains were still found in immunized swine herds. Our research aims to explore a new rapid …	2020/6/22	2022/9/20 11:25	2022/9/20 11:25				1	16		BMC Vet. Res.								English							Place: London Publisher: Bmc WOS:000544933800003				variant; protein; outbreak; gene; pcr; province; Porcine epidemic diarrhea virus; complete genome sequence; Differentiate; field strains; orf1; porcine-epidemic-diarrhea; Recombinase polymerase amplification; virus-strain
W3PPW84Y	journalArticle	2020	Long, Elisa F.; Chen, M. Keith; Rohla, Ryne	Political storms: Emergent partisan skepticism of hurricane risks	Science Advances		2375-2548	10.1126/sciadv.abb7906		Mistrust of scientific evidence and government-issued guidelines is increasingly correlated with political affiliation. Survey evidence has documented skepticism in a diverse set of issues including climate change, vaccine hesitancy, and, most recently, COVID-19 risks. Less well understood is whether these beliefs alter high-stakes behavior. Combining GPS data for 2.7 million smartphone users in …	20-Sep	2022/9/20 11:25	2022/9/20 11:25		eabb7906		37	6		Sci. Adv.								English							Place: Washington Publisher: Amer Assoc Advancement Science WOS:000571356100026				science literacy
HIR5DEQX	journalArticle	2020	Okuhara, Tsuyoshi; Okada, Hiroko; Kiuchi, Takahiro	Examining persuasive message type to encourage staying at home during the COVID-19 pandemic and social lockdown: A randomized controlled study in Japan	Patient Education and Counseling		0738-3991	10.1016/j.pec.2020.08.016		Objective: Behavioral change is the only prevention against the COVID-19 pandemic until vaccines become available. This is the first study to examine the most persuasive message type in terms of narrator difference in encouraging people to stay at home during the COVID-19 pandemic and social lockdown. Methods: Participants (n = 1,980) were randomly assigned to five intervention messages (from a g…	20-Dec	2022/9/20 11:25	2022/9/20 11:25		2588-2593		12	103		Patient Educ. Couns.								English							Place: Clare Publisher: Elsevier Ireland Ltd WOS:000589750600027				covid-19; Health communication; fear appeals; protection motivation; Persuasion; Novel coronavirus; Protection motivation theory; Social lockdown
RH5DRWJG	journalArticle	2020	Elgendy, Marwa O.; El-Gendy, Ahmed O.; Abdelrahim, Mohamed E. A.	Public awareness in Egypt about COVID-19 spread in the early phase of the pandemic	Patient Education and Counseling		0738-3991	10.1016/j.pec.2020.09.002		Objective: This study aimed to evaluate public awareness in Egypt related to the coronavirus. Methods: An online structured survey was conducted during March and April 2020 to assess coronavirus knowledge. The questionnaire was divided into 6 parts consisting of 39 questions for a total possible score of 0 to 39; to assess the participants' general knowledge [10 items]; symptoms knowledge [2 item…	20-Dec	2022/9/20 11:25	2022/9/20 11:25		2598-2601		12	103		Patient Educ. Couns.								English							Place: Clare Publisher: Elsevier Ireland Ltd WOS:000589750600029				covid-19; syndrome coronavirus; who; Egypt; east respiratory syndrome; Public awareness
93WNNH43	journalArticle	2020	Cerofolini, Linda; Fragai, Marco; Luchinat, Claudio; Ravera, Enrico	Orientation of immobilized antigens on common surfaces by a simple computational model: Exposition of SARS-CoV-2 Spike protein RBD epitopes	Biophysical Chemistry		0301-4622	10.1016/j.bpc.2020.106441		The possibility of immobilizing a protein with antigenic properties on a solid support offers significant possibilities in the development of immunosensors and vaccine formulations. For both applications, the orientation of the antigen should ensure ready accessibility of the antibodies to the epitope. However, an experimental assessment of the orientational preferences necessarily proceeds throu…	20-Oct	2022/9/20 11:25	2022/9/20 11:25		106441			265		Biophys. Chem.								English							Place: Amsterdam Publisher: Elsevier WOS:000566472600008				prediction; antibodies; adsorption; nanoparticles; simulation; conformation; Bioconjugation; Immunosensing; molecular alignment; monolayers; Protein-surface interaction; rationalization; solid-state nmr; United residue model
7HNXWL7H	bookSection	2020	Fehr, Anthony R.	Bacterial Artificial Chromosome-Based Lambda Red Recombination with the I-SceI Homing Endonuclease for Genetic Alteration of MERS-CoV	Mers Coronavirus: Methods and Protocols	978-1-07-160211-9 978-1-07-160210-2				Over the past two decades, several coronavirus (CoV) infectious clones have been engineered, allowing for the manipulation of their large viral genomes (similar to 30 kb) using unique reverse genetic systems. These reverse genetic systems include targeted recombination, in vitro ligation, vaccinia virus vectors, and bacterial artificial chromosomes (BACs). Quickly after the identification of Midd…	2020	2022/9/20 11:25	2022/9/20 11:25		53-68			2099								Humana Press Inc	Totowa	English							DOI: 10.1007/978-1-0716-0211-9_5 ISSN: 1064-3745 Journal Abbreviation: Methods Mol. Biol. WOS:000664344500006				Coronavirus; rna; coronavirus; MERS-CoV; length infectious cdna; Reverse genetics; Bacterial artificial chromosome (BAC); bacteriophage-lambda; Infectious clone; Lambda red recombination		Vijay, R.
S4XULS2V	journalArticle	2021	Tau, Noam; Yahav, Dafna; Shepshelovich, Daniel	Vaccine safety - is the SARS-CoV-2 vaccine any different?	Human Vaccines & Immunotherapeutics		2164-5515	10.1080/21645515.2020.1829414		Vaccines have changed modern medicine, and are a mainstay in reducing morbidity and mortality from infections. Our research group recently published a study in which we found that vaccines approved by the US Food and Drugs Administration were safe with few clinically important post-approval adverse effects. The current COVID-19 pandemic presents regulators with the unprecedented challenge of bala…	2021/5/4	2022/9/20 11:25	2022/9/20 11:25		1322-1325		5	17		Human Vaccines Immunother.								English							Place: Philadelphia Publisher: Taylor & Francis Inc WOS:000596297400001				covid-19; SARS-CoV-2; safety; Vaccine; vaers; fda
W8PPLQE3	journalArticle	2020	Yousuf, Hamza; Corbin, Jonathan; Sweep, Govert; Hofstra, Martijn; Scherder, Erik; van Gorp, Eric; Zwetsloot, Peter Paul; Zhao, Jiayu; van Rossum, Bert; Jiang, Ting; Lindemans, Jan-Willem; Narula, Jagat; Hofstra, Leonard	Association of a Public Health Campaign About Coronavirus Disease 2019 Promoted by News Media and a Social Influencer With Self-reported Personal Hygiene and Physical Distancing in the Netherlands	Jama Network Open		2574-3805	10.1001/jamanetworkopen.2020.14323		Importance In the absence of a vaccine and therapeutic agent, personal hygiene and physical distancing are essential measures to contain the coronavirus disease 2019 pandemic. Objective To determine whether a social media campaign, targeted at the gaps in behavior on personal hygiene and physical distancing and distributed nationwide via digital news media, may be an effective method to improve b…	2020/7/8	2022/9/20 11:25	2022/9/20 11:25		e2014323		7	3		JAMA Netw. Open								English							Place: Chicago Publisher: Amer Medical Assoc WOS:000552096900007				behavior
V46NRKSM	journalArticle	2020	Brochot, Etienne; Demey, Baptiste; Touze, Antoine; Belouzard, Sandrine; Dubuisson, Jean; Schmit, Jean-Luc; Duverlie, Gilles; Francois, Catherine; Castelain, Sandrine; Helle, Francois	Anti-spike, Anti-nucleocapsid and Neutralizing Antibodies in SARS-CoV-2 Inpatients and Asymptomatic Individuals	Frontiers in Microbiology			10.3389/fmicb.2020.584251		A better understanding of the anti-SARS-CoV-2 immune response is necessary to finely evaluate commercial serological assays but also to predict protection against reinfection and to help the development of vaccines. For this reason, we monitored the anti-SARS-CoV-2 antibody response in infected patients. In order to assess the time of seroconversion, we used 151 samples from 30 COVID-19 inpatient…	2020/10/19	2022/9/20 11:25	2022/9/20 11:25		584251			11		Front. Microbiol.								English							Place: Lausanne Publisher: Frontiers Media Sa WOS:000583267400001				covid-19; SARS-CoV-2; vaccine; neutralizing antibodies; spike; convalescent plasma therapy; nucleocapsid
CH9MVCF8	journalArticle	2020	Li, Jiacheng; Ma, Xiaoliang; Guo, Shuai; Hou, Chengyu; Shi, Liping; Zhang, Hongchi; Zheng, Bing; Liao, Chenchen; Yang, Lin; Ye, Lin; He, Xiaodong	A Hydrophobic-Interaction-Based Mechanism Triggers Docking between the SARS-CoV-2 Spike and Angiotensin-Converting Enzyme 2	Global Challenges			10.1002/gch2.202000067		A recent experimental study found that the binding affinity between the cellular receptor human angiotensin-converting enzyme 2 (ACE2) and receptor-binding domain (RBD) in the spike (S) protein of novel severe acute respiratory syndrome coronavirus 2 (SARS-CoV-2) is more than tenfold higher than that of the original severe acute respiratory syndrome coronavirus (SARS-CoV). However, main chain str…	20-Dec	2022/9/20 11:25	2022/9/20 11:25		2000067		12	4		Glob. Chall.								English							Place: Weinheim Publisher: Wiley-V C H Verlag Gmbh WOS:000577697000001				covid-19; SARS-CoV-2; coronavirus; binding; protein; compensation; molecular-dynamics; docking; angiotensin-converting enzyme 2; hydrophobic interactions; scoring functions
VFEXRVAC	journalArticle	2020	Oehmke, James Francis; Oehmke, Theresa B.; Singh, Lauren Nadya; Post, Lori Ann	Dynamic Panel Estimate-Based Health Surveillance of SARS-CoV-2 Infection Rates to Inform Public Health Policy: Model Development and Validation	Journal of Medical Internet Research		1438-8871	10.2196/20924		Background: SARS-CoV-2, the novel coronavirus that causes COVID-19, is a global pandemic with higher mortality and morbidity than any other virus in the last 100 years. Without public health surveillance, policy makers cannot know where and how the disease is accelerating, decelerating, and shifting. Unfortunately, existing models of COVID-19 contagion rely on parameters such as the basic reprodu…	2020/9/22	2022/9/20 11:25	2022/9/20 11:25		e20924		9	22		J. Med. Internet Res.								English							Place: Toronto Publisher: Jmir Publications, Inc WOS:000599147600008				covid-19; surveillance; coronavirus; specification; tests; models; covid-19 outbreak; infectious disease modeling; COVID-19 guidelines; COVID-19 health policy; COVID-19 surveillance system; dynamic panel data; generalized-method; moments; reopening America
24D32PNG	journalArticle	2020	Lee, Chloe H.; Pinho, Mariana Pereira; Buckley, Paul R.; Woodhouse, Isaac B.; Ogg, Graham; Simmons, Alison; Napolitani, Giorgio; Koohy, Hashem	Potential CD8+T Cell Cross-Reactivity Against SARS-CoV-2 Conferred by Other Coronavirus Strains	Frontiers in Immunology		1664-3224	10.3389/fimmu.2020.579480		While individuals infected with coronavirus disease 2019 (COVID-19) manifested a broad range in susceptibility and severity to the disease, the pre-existing immune memory to related pathogens cross-reactive against SARS-CoV-2 can influence the disease outcome in COVID-19. Here, we investigated the potential extent of T cell cross-reactivity against severe acute respiratory syndrome coronavirus 2 …	2020/11/5	2022/9/20 11:25	2022/9/20 11:25		579480			11		Front. Immunol.								English							Place: Lausanne Publisher: Frontiers Media Sa WOS:000590255600001				covid-19; SARS-CoV-2; cross-reactivity; epitopes; antigen presentation; CD8+T cell recognition; predict immunogenicity
LMPFJM9A	journalArticle	2020	Jin, Zhenming; Du, Xiaoyu; Xu, Yechun; Deng, Yongqiang; Liu, Meiqin; Zhao, Yao; Zhang, Bing; Li, Xiaofeng; Zhang, Leike; Peng, Chao; Duan, Yinkai; Yu, Jing; Wang, Lin; Yang, Kailin; Liu, Fengjiang; Jiang, Rendi; Yang, Xinglou; You, Tian; Liu, Xiaoce; Yang, Xiuna; Bai, Fang; Liu, Hong; Liu, Xiang; Guddat, Luke W.; Xu, Wenqing; Xiao, Gengfu; Qin, Chengfeng; Shi, Zhengli; Jiang, Hualiang; Rao, Zihe;…	Structure of M-pro from SARS-CoV-2 and discovery of its inhibitors	Nature		0028-0836	10.1038/s41586-020-2223-y		A programme of structure-assisted drug design and high-throughput screening identifies six compounds that inhibit the main protease of SARS-CoV-2, demonstrating the ability of this strategy to isolate drug leads with clinical potential. A new coronavirus, known as severe acute respiratory syndrome coronavirus 2 (SARS-CoV-2), is the aetiological agent responsible for the 2019-2020 viral pneumonia …	20-Jun	2022/9/20 11:25	2022/9/20 11:25		289-+		7811	582		Nature								English							Place: Berlin Publisher: Nature Portfolio WOS:000537932300001				binding; sars; prevention; respiratory syndrome-coronavirus; complex; docking; ebselen; proteinase; specificities; virus main protease
6GMKUU6V	bookSection	2020	Li, Kun; McCray, Paul B.	Development of a Mouse-Adapted MERS Coronavirus	Mers Coronavirus: Methods and Protocols	978-1-07-160211-9 978-1-07-160210-2				First identified in 2012, Middle East respiratory syndrome coronavirus (MERS-CoV) is a novel virus that can cause acute respiratory distress syndrome (ARDS), multiorgan failure, and death, with a case fatality rate of similar to 35%. An animal model that supports MERS-CoV infection and causes severe lung disease is useful to study pathogenesis and evaluate therapies and vaccines. The murine dipep…	2020	2022/9/20 11:25	2022/9/20 11:25		161-171			2099								Humana Press Inc	Totowa	English							DOI: 10.1007/978-1-0716-0211-9_13 ISSN: 1064-3745 Journal Abbreviation: Methods Mol. Biol. WOS:000664344500014				infection; disease; model; spread; generation; mice; cov; respiratory syndrome coronavirus; dipeptidyl peptidase 4; functional receptor; Mouse model; Mouse-adapted virus; Serial passage; Virus clone isolation		Vijay, R.
MUVLA8J9	journalArticle	2022	Ogidigo, Joyce Oloaigbe; Iwuchukwu, Emmanuel A.; Ibeji, Collins U.; Okpalefe, Okiemute; Soliman, Mahmoud E. S.	Natural phyto, compounds as possible noncovalent inhibitors against SARS-CoV2 protease: computational approach	Journal of Biomolecular Structure & Dynamics		0739-1102	10.1080/07391102.2020.1837681		At present, there is no cure or vaccine for the devastating new highly infectious severe acute respiratory syndrome coronavirus 2 (SARS-CoV-2) that has affected people globally. Herein, we identified potent phytocompounds from two antiviral plants Momordica charantia L. and Azadirachta indica used locally for the treatment of viral and parasitic infections. Structure-based virtual screening and m…	2022/3/24	2022/9/20 11:25	2022/9/20 11:25		2284-2301		5	40		J. Biomol. Struct. Dyn.								English							Place: Philadelphia Publisher: Taylor & Francis Inc WOS:000583907900001				SARS-CoV-2; binding; dynamics; model; design; drugs; solubility; bioavailability; mmgba; molecular dynamics simulations; molecular-properties; natural phytocompounds; permeability; polar surface-area
YF3RGMRM	journalArticle	2020	Liu, Chao; Dun, Yaoshan; Liu, Ping; You, Baiyang; Shu, Kongliang; Luo, Huijun; Ripley-Gonzalez, Jeffrey W.; Liu, Suixin; Liu, Jiyang; Li, Bo	Associations of medications used during hospitalization and immunological changes in patients with COVID-19 during 3-month follow-up	International Immunopharmacology		1567-5769	10.1016/j.intimp.2020.107121		Background: Understanding the immunological responses in COVID-19 patients during their recovery period is essential to the development of a vaccine and herd immunity. Methods: This retrospective cohort study screened 233 patients admitted to the First Hospital of Changsha, China with COVID-19 from January 17th to February 29th, 2020. After completion of SARS-CoV2-specific immunoglobulins, and T …	20-Dec	2022/9/20 11:25	2022/9/20 11:25		107121			89		Int. Immunopharmacol.								English							Patent Number: A Place: Amsterdam Publisher: Elsevier WOS:000598898800009				covid-19; responses; memory; vaccines; Immunological response; Medication
KGTCUD2F	bookSection	2020	Leist, Sarah R.; Cockrell, Adam S.	Genetically Engineering a Susceptible Mouse Model for MERS-CoV-Induced Acute Respiratory Distress Syndrome	Mers Coronavirus: Methods and Protocols	978-1-07-160211-9 978-1-07-160210-2				Since 2012, monthly cases of Middle East respiratory syndrome coronavirus (MERS-CoV) continue to cause severe respiratory disease that is fatal in similar to 35% of diagnosed individuals. The ongoing threat to global public health and the need for novel therapeutic countermeasures have driven the development of animal models that can reproducibly replicate the pathology associated with MERS-CoV i…	2020	2022/9/20 11:25	2022/9/20 11:25		137-159			2099								Humana Press Inc	Totowa	English							DOI: 10.1007/978-1-0716-0211-9_12 ISSN: 1064-3745 Journal Abbreviation: Methods Mol. Biol. WOS:000664344500013				disease; transmission; mechanisms; monoclonal-antibody; generation; mice; functional receptor; syndrome coronavirus infection; dipeptidyl peptidase 4; adenosine-deaminase; Cas9; Clustered regularly interspaced short palindromic repeats; Middle East respiratory syndrome coronavirus; Mouse; Pathogenesis		Vijay, R.
ZCMI2IIR	journalArticle	2020	Bell, Sadie; Clarke, Richard; Mounier-Jack, Sandra; Walker, Jemma L.; Paterson, Pauline	Parents' and guardians' views on the acceptability of a future COVID-19 vaccine: A multi-methods study in England	Vaccine		0264-410X	10.1016/j.vaccine.2020.10.027		Background: The availability of a COVID-19 vaccine has been heralded as key to controlling the COVID-19 pandemic. COVID-19 vaccination programme success will rely on public willingness to be vaccinated. Methods: We used a multi-methods approach - involving an online cross-sectional survey and semi-structured interviews - to investigate parents' and guardians' views on the acceptability of a futur…	2020/11/17	2022/9/20 11:25	2022/9/20 11:25		7789-7798		49	38		Vaccine								English							Place: Oxford Publisher: Elsevier Sci Ltd WOS:000588128100012				covid-19; Coronavirus; Vaccine; Acceptance; Child
2FWTYNSH	journalArticle	2020	Zakirulla, M.; AiQarni, Turki Saeed F.; Alshehri, Raad Abdullah S.; Ismail, Abdulrahman Ahmed M.; Alawwad, Sami M.; Abdullah, Safar Mohammed; Assiri, Moath Nasser M.; Jathmi, Majed Ali A.; Alshahrani, Abdullah Mohammed A.; Almotheby, Fand Hassan S.; Alshehri, Abdulrahman Mohammed A.; Alhasanyyah, Abduraheem Raqi Ali; Alharbi, Abdulbari Abdullah S.; Assiri, Abdullah Mohammed Ali	Novel Coronavirus (COVID-19) Knowledge and Perceptions: A Survey of Dental students in King Khalid University, Abha, Saudi Arabia	Journal of Research in Medical and Dental Science		2347-2545			Background: This study was to investigate to evaluate the knowledge and perceptions among dental students about novel COVID-19 infection in the College of Dentistry, King Khalid University. Materials and Methods: The current cross-sectional study consists of Sample of 400 (248 males and 152 females) dental students and interns in College of Dentistry King Khalid University, Abha, Saudi Arabia. Wr…	2020	2022/9/20 11:25	2022/9/20 11:25		225-231		6	8		J. Res. Med. Dent. Sci.								English							Place: Gujarat Publisher: Amber Publication WOS:000582802600034				Coronavirus; outbreak; Saudi Arabia; Transmission; Dental students; Viral infection; Questionnaire
SIKYV8ZH	journalArticle	2020	Maciel, Vladimir Fernandes; Ruiz de Gamboa, Ulisses Monteiro	The landscape for vaccine candidates of COVID-19: is there any relationship between innovation and the business environment of countries?	Revista Do Servico Publico		0034-9240	10.21874/rsp.v71i4.5066		The insurgency of the new coronavirus (SARS-COV-2) has attracted the attention of the public, authorities and academics. To date, no chemical treatment has proven efficient in clinical tests to combat the virus. The hope for the reopening of socioeconomic activities is found in the discovery of vaccines that can immunize people on a large scale. According to the World Health Organization, there a…	20-Dec	2022/9/20 11:25	2022/9/20 11:25		725-745		4	71		Rev. Serv. Publico								English							Place: Brasilia Publisher: Escola Nacl Adm Publica-Enap WOS:000603665200002				covid-19; vaccines; panel-data; tests; innovation; economic freedom
NVADIVDQ	journalArticle	2020	Zhang, Haiping; Yang, Yang; Li, Junxin; Wang, Min; Saravanan, Konda Mani; Wei, Jinli; Ng, Justin Tze-Yang; Hossain, Md Tofazzal; Liu, Maoxuan; Zhang, Huiling; Ren, Xiaohu; Pan, Yi; Peng, Yin; Shi, Yi; Wan, Xiaochun; Liu, Yingxia; Wei, Yanjie	A novel virtual screening procedure identifies Pralatrexate as inhibitor of SARS-CoV-2 RdRp and it reduces viral replication in vitro	Plos Computational Biology		1553-734X	10.1371/journal.pcbi.1008489		The spread of severe acute respiratory syndrome coronavirus 2 (SARS-CoV-2) virus poses serious threats to the global public health and leads to worldwide crisis. No effective drug or vaccine is readily available. The viral RNA-dependent RNA polymerase (RdRp) is a promising therapeutic target. A hybrid drug screening procedure was proposed and applied to identify potential drug candidates targetin…	20-Dec	2022/9/20 11:25	2022/9/20 11:25		e1008489		12	16		PLoS Comput. Biol.								English							Place: San Francisco Publisher: Public Library Science WOS:000605330800002				state; algorithms; efficient
GA7ADDZQ	journalArticle	2020	Atluri, Sairam; Manchikanti, Laxmaiah; Hirsch, Joshua A.	Expanded Umbilical Cord Mesenchymal Stem Cells (UC-MSCs) as a Therapeutic Strategy In Managing Critically Ill COVID-19 Patients: The Case for Compassionate Use	Pain Physician		1533-3159			COVID-19 has affected the United States leading to a national emergency with health care and economic impact, propelling the country into a recession with disrupted lifestyles not seen in recent history. COVID-19 is a serious illness leading to multiple deaths in various countries including the United States. Several million Americans satisfy the Center for Disease Control and Prevention (CDC) cr…	20-Apr	2022/9/20 11:25	2022/9/20 11:25		E71-E83		2	23		Pain Physician								English							Place: Paducah Publisher: Am Soc Interventional Pain Physicians WOS:000521753300001				covid-19; Coronavirus; pneumonia; efficacy; protein; outbreak; cytokine storm; peptides; ace2; sars coronavirus; functional receptor; transplantation; expanded umbilical cord mesenchymal stem cells; low-back-pain; multiorgan failure
7CKASQQT	journalArticle	2020	Scemama, Pascal; Farah, Fadi; Mann, Glen; Margulis, Roman; Gritsenko, Karina; Shaparin, Naum	Considerations for Epidural Blood Patch and Other Postdural Puncture Headache Treatments in Patients with COVID-19	Pain Physician		1533-3159			Background: A primary concern in the use of EBP in these patients is the possibility of seeding the virus in the CNS. Another important concern is related to the known hypercoagulable state in COVID-19 positive patients and associated organ dysfunction that may alter the metabolism of anticoagulants. The safety of the providers performing the EBP, the position of the patient and choices for image…	20-Aug	2022/9/20 11:25	2022/9/20 11:25		S305-S310		4	23		Pain Physician								English							Place: Paducah Publisher: Am Soc Interventional Pain Physicians WOS:000590262800009				covid-19; block; Epidural Blood Patch; neuraxial anesthesia; parturients; pdph; Post-dural Puncture Headache; regional anesthesia
34H972AS	journalArticle	2020	Saletti, Giulietta; Gerlach, Thomas; Jansen, Janina M.; Molle, Antonia; Elbahesh, Husni; Ludlow, Martin; Li, Wentao; Bosch, Berend-Jan; Osterhaus, Albert D. M. E.; Rimmelzwaan, Guus F.	Older adults lack SARS CoV-2 cross-reactive T lymphocytes directed to human coronaviruses OC43 and NL63	Scientific Reports		2045-2322	10.1038/s41598-020-78506-9		Currently, infections with SARS-Coronavirus-2 (SARS-CoV-2), the causative agent of the COVID-19 pandemic, are responsible for substantial morbidity and mortality worldwide. Older adults subjects>60 years of age account for>95% of the over one million fatal cases reported to date. It is unclear why in this age group SARS-CoV-2 infection causes more severe disease than in young adults. We hypothesi…	2020/12/8	2022/9/20 11:25	2022/9/20 11:25		21447		1	10		Sci Rep								English							Place: Berlin Publisher: Nature Portfolio WOS:000600132400051				disease; vaccines; protection; acute respiratory syndrome; spike protein; correlate; immune-response; zika virus; cell responses; clearance
XSWTW27S	journalArticle	2020	Chatterjee, Pranam; Ponnapati, Manvitha; Kramme, Christian; Plesa, Alexandru M.; Church, George M.; Jacobson, Joseph M.	Targeted intracellular degradation of SARS-CoV-2 via computationally optimized peptide fusions	Communications Biology			10.1038/s42003-020-01470-7		The COVID-19 pandemic, caused by the novel coronavirus SARS-CoV-2, has elicited a global health crisis of catastrophic proportions. With only a few vaccines approved for early or limited use, there is a critical need for effective antiviral strategies. In this study, we report a unique antiviral platform, through computational design of ACE2-derived peptides which both target the viral spike prot…	2020/11/23	2022/9/20 11:25	2022/9/20 11:25		715		1	3		Commun. Biol.								English							Place: Berlin Publisher: Nature Portfolio WOS:000595719900001				coronavirus; protein; sars-cov; specificity; crispr; ubiquitination
FYFMLUSB	journalArticle	2020	Hosoki, Koa; Chakraborty, Abhijit; Sur, Sanjiv	Molecular mechanisms and epidemiology of COVID-19 from an allergist's perspective	Journal of Allergy and Clinical Immunology		0091-6749	10.1016/j.jaci.2020.05.033		The global pandemic caused by the newly described severe acute respiratory syndrome coronavirus 2 (SARS-CoV-2) has caused worldwide suffering and death of unimaginable magnitude from coronavirus disease 2019 (COVID-19). The virus is transmitted through aerosol droplets, and causes severe acute respiratory syndrome. SARS-CoV-2 uses the receptor-binding domain of its spike protein S1 to attach to t…	20-Aug	2022/9/20 11:25	2022/9/20 11:25		285-299		2	146		J. Allergy Clin. Immunol.								English							Place: New York Publisher: Mosby-Elsevier WOS:000558835000013				covid-19; acute respiratory syndrome; ace2; receptor-binding domain; transmission dynamics; angiotensin-converting enzyme-2; asthma; sars-coronavirus; tmprss2; severe acute respiratory syndrome coronavirus 2; coronavirus spike protein; allergic rhinitis; induced asthma exacerbations; kawasaki-like disease; proteolytic activation; syncytial virus; tract infections
HYGGPVHN	journalArticle	2020	Li, Fei; Zeng, Yubing; Zhang, Rubo; Peng, Kenan; Jiang, Chaoyuan; Xu, Zhiwen; Zhu, Ling	Genetic variations in S gene of porcine epidemic diarrhoea virus from 2018 in Sichuan Province, China	Veterinary Medicine and Science			10.1002/vms3.326		Porcine epidemic diarrhoea virus (PEDV) belongs to the family Coronavirus, a genus of coronavirus, a highly contact-infectious intestinal disease pathogen. In this study, we downloaded 62 PEDV S gene sequences uploaded to GenBank, including 10 uploaded by our laboratory from 2018, and constructed a PEDV S gene evolution tree using MEGA V7.0 software. Phylogenetic tree analysis indicated that the …	20-Nov	2022/9/20 11:25	2022/9/20 11:25		910-918		4	6		Vet. Med. Sci.								English							Place: Hoboken Publisher: Wiley WOS:000565716100001				vaccine; efficacy; pedv; strains; sequence; phylogenetic analysis; genetic evolution; genogroup
2ZY7V3Q4	journalArticle	2020	Al-Motawa, Maryam S.; Abbas, Hafsa; Wijten, Patrick; de la Fuente, Alberto; Xue, Mingzhan; Rabbani, Naila; Thornalley, Paul J.	Vulnerabilities of the SARS-CoV-2 Virus to Proteotoxicity-Opportunity for Repurposed Chemotherapy of COVID-19 Infection	Frontiers in Pharmacology			10.3389/fphar.2020.585408		The global pandemic of COVID-19 disease caused by infection with the SARS-CoV-2 coronavirus, has produced an urgent requirement and search for improved treatments while effective vaccines are developed. A strategy for improved drug therapy is to increase levels of endogenous reactive metabolites for selective toxicity to SARS-CoV-2 by preferential damage to the viral proteome. Key reactive metabo…	2020/10/9	2022/9/20 11:25	2022/9/20 11:25		585408			11		Front. Pharmacol.								English							Place: Lausanne Publisher: Frontiers Media Sa WOS:000581102200001				covid-19; cancer; coronavirus; inhibition; replication; bioinformatics; doxorubicin; proteomics; antiviral activity; bromobenzylglutathione cyclopentyl diester; dicarbonyl stress; glyoxalase; glyoxalase i; human serum; methylglyoxal; paclitaxel; vitro
TCXFP6TI	journalArticle	2020	Sifat, Ali Ehsan; Nozohouri, Saeideh; Villalba, Heidi; Vaidya, Bhuvaneshwar; Abbruscato, Thomas J.	The Role of Smoking and Nicotine in the Transmission and Pathogenesis of COVID-19	Journal of Pharmacology and Experimental Therapeutics		0022-3565	10.1124/jpet.120.000170		Coronavirus disease 2019 (COVID-19), caused by the severe acute respiratory syndrome coronavirus 2 virus, is turning out to be one of the most devastating global pandemics in the history of humankind. There is a shortage of effective therapeutic strategies or preventative vaccines for this disease to date. A rigorous investigation is needed for identifying and developing more effective therapeuti…	2020/12/1	2022/9/20 11:25	2022/9/20 11:25		498-509		3	375		J. Pharmacol. Exp. Ther.								English							Place: Bethesda Publisher: Amer Soc Pharmacology Experimental Therapeutics WOS:000607657100011				cells; in-vitro; sars-cov; angiotensin-converting enzyme; respiratory-syndrome coronavirus; lung injury; brain; potential role; 2 ace2; e-cigarette use
U9Z2ZUQI	journalArticle	2020	Wehenkel, Christian	Positive association between COVID-19 deaths and influenza vaccination rates in elderly people worldwide	Peerj		2167-8359	10.7717/peerj.10112		Background: The coronavirus disease 2019 (COVID-19) pandemic, caused by severe acute respiratory syndrome coronavirus 2 (SARS-CoV-2), is an ongoing global health crisis, directly and indirectly impacting all spheres of human life. Some pharmacological measures have been proposed to prevent COVID-19 or reduce its severity, such as vaccinations. Previous reports indicate that influenza vaccination …	2020/10/1	2022/9/20 11:25	2022/9/20 11:25		e10112			8		PeerJ								English							Place: London Publisher: Peerj Inc WOS:000574775200004				SARS-CoV-2; virus; interference; Lockdown; Risk factors; Face mask use; Geographical longitude; Global health crisis; Virus interference
EKFQNBSR	journalArticle	2020	McCaffery, Kirsten J.; Dodd, Rachael H.; Cvejic, Erin; Batcup, Carys; Ayre, Julie; Isautier, Jennifer M. J.; Copp, Tessa; Bonner, Carissa; Pickles, Kristen; Nickel, Brooke; Dakin, Thomas; Cornell, Samuel; Wolf, Michael S.	Health literacy and disparities in COVID-19-related knowledge, attitudes, beliefs and behaviours in Australia	Public Health Research & Practice		2204-2091	10.17061/phrp30342012		Objectives: To explore the variation in understanding of, attitudes towards, and uptake of, health advice on coronavirus disease 2019 (COVID-19) during the 2020 pandemic stage 3 restrictions ('lockdown') by health literacy in the Australian population. Study design: National cross-sectional community survey. Setting: Australian general public. Participants: Adults aged over 18 years (N = 4362). M…	20-Dec	2022/9/20 11:25	2022/9/20 11:25		30342012		4	30		Public Health Res. Pract.								English							Place: Ultimo Publisher: Sax Inst WOS:000599243800002				validation
P2HATT2B	journalArticle		Kumari, Anchala; Rajput, Vikrant Singh; Nagpal, Priya; Kukrety, Himanshi; Grover, Sonam; Grover, Abhinav	Dual inhibition of SARS-CoV-2 spike and main protease through a repurposed drug, rutin	Journal of Biomolecular Structure & Dynamics		0739-1102	10.1080/07391102.2020.1864476		The global health emergency caused by the severe acute respiratory syndrome coronavirus 2 (SARS-CoV-2) has led to alarming numbers of fatalities across the world. So far the researchers worldwide have not been able to discover a breakthrough in the form of a potent drug or an effective vaccine. Therefore, it is imperative to discover drugs to curb the ongoing menace. In silico approaches using FD…		2022/9/20 11:25	2022/9/20 11:25							J. Biomol. Struct. Dyn.								English							Place: Philadelphia Publisher: Taylor & Francis Inc WOS:000603849200001				SARS-CoV-2; spike protein; main protease; drug repurposing; MD simulation; rutin
3FJ3CBGQ	journalArticle	2020	Idda, Maria Laura; Soru, Dorian; Floris, Matteo	Overview of the First 6 Months of Clinical Trials for COVID-19 Pharmacotherapy: The Most Studied Drugs	Frontiers in Public Health			10.3389/fpubh.2020.00497		SARS-CoV-2 rapidly spread from China until it was defined a pandemic by WHO in March 2020. Related scientific papers have rapidly extended information regarding the diagnosis, treatment and epidemiology of COVID-19 infection. To date, no vaccine or definitive treatment is available to defeat the virus and therapies are mainly based on existing drugs used to treat other conditions. Existing therap…	2020/8/21	2022/9/20 11:25	2022/9/20 11:25		497			8		Front. Public Health								English							Place: Lausanne Publisher: Frontiers Media Sa WOS:000568278000001				covid-19; coronavirus; pneumonia; COVID-19 infection; 172); clinical trial (2; coronavirus (2019-nCoV); COVID-19 (condition)
3K7489PL	journalArticle	2020	Vila-Corcoles, Angel; Ochoa-Gondar, Olga; Satue-Gracia, Eva M.; Torrente-Fraga, Cristina; Gomez-Bertomeu, Frederic; Vila-Rovira, Angel; Hospital-Guardiola, Immaculada; de Diego-Cabanes, Cinta; Bejarano-Romero, Ferran; Basora-Gallisa, Josep	Influence of prior comorbidities and chronic medications use on the risk of COVID-19 in adults: a population-based cohort study in Tarragona, Spain	Bmj Open		2044-6055	10.1136/bmjopen-2020-041577		Objective To investigate possible relationships between pre-existing medical conditions (including common comorbidities and chronic medications) and risk for suffering COVID-19 disease in middle-aged and older adults. Design Population-based retrospective cohort study. Setting Twelve primary care centres (PCCs) in Tarragona (Spain). Participants 79 083 people (77 676 community-dwelling and 1407 n…	2020	2022/9/20 11:25	2022/9/20 11:25		e041577		12	10		BMJ Open								English							Place: London Publisher: Bmj Publishing Group WOS:000600203600037				public health; epidemiology; primary care
S89ICB46	journalArticle	2020	Fidel, Paul L.; Noverr, Mairi C.	Could an Unrelated Live Attenuated Vaccine Serve as a Preventive Measure To Dampen Septic Inflammation Associated with COVID-19 Infection?	Mbio		2150-7511	10.1128/mBio.00907-20		We propose the concept that administration of an unrelated live attenuated vaccine, such as MMR (measles, mumps, rubella), could serve as a preventive measure against the worst sequelae of coronavirus disease 2019 (COVID-19). There is mounting evidence that live attenuated vaccines provide nonspecific protection against lethal infections unrelated to the target pathogen of the vaccine by inducing…	20-Jun	2022/9/20 11:25	2022/9/20 11:25		e00907-20		3	11		mBio								English							Place: Washington Publisher: Amer Soc Microbiology WOS:000572050700009				covid-19; inflammation; sepsis; clinical trial; mmr; live attenuated vaccines; myeloid-derived suppressor cells; trained innate immunity
VIN6SDB7	journalArticle	2020	Kandeel, Mahmoud; Kitade, Yukio; Almubarak, Abdullah	Repurposing FDA-approved phytomedicines, natural products, antivirals and cell protectives against SARS-Cov-2 (COVID-19) RNA-dependent RNA polymerase	Peerj		2167-8359	10.7717/peerj.10480		Following the recent emergence of SARS-CoV-2 or coronavirus disease 2019 (COVID-19), drug discovery and vaccine design to combat this fatal infection are critical. In this study, an essential enzyme in the SARS-CoV-2 replication machinery, RNA-dependent RNA polymerase (RDRP), is targeted in a virtual screening assay using a set of 1,664 FDA-approved drugs, including sets of botanical and syntheti…	2020/11/30	2022/9/20 11:25	2022/9/20 11:25		e10480			8		PeerJ								English							Place: London Publisher: Peerj Inc WOS:000594095800005				covid-19; SARS-CoV-2; docetaxel; Virtual screening; lopinavir/ritonavir; glide; accurate docking; Polymerase
JCCGCGEG	journalArticle	2020	Alamdari, Daryoush Hamidi; Moghaddam, Ahmad Bagheri; Amini, Shahram; Alamdari, Aida Hamidi; Damsaz, Mohammadamin; Yarahmadi, Amir	The Application of a Reduced Dye Used in Orthopedics as a Novel Treatment against Coronavirus (COVID-19): A Suggested Therapeutic Protocol	Archives of Bone and Joint Surgery-Abjs		2345-4644	10.22038/abjs.2020.47745.2349		The severe acute respiratory syndrome caused by COVID-19 is now a global catastrophic event. Currently there is no approved drug or vaccine for the disease. Methylene blue (MB, oxidized form, blue color) has been used in many different areas of clinical medicine, ranging from malaria to orthopedics. Leucomethylene Blue (reduced form of MB, colorless) may be applied for the treatment of COVID-19 a…	20-Apr	2022/9/20 11:25	2022/9/20 11:25		291-294			8		Arch. Bone Jt. Surg.-ABJS								English							Place: Mashhad Publisher: Mashhad Univ Med Sciences WOS:000527384200015				covid-19; Coronavirus; methylene-blue; Leucomethylene blue; Methylene blue
3LLRUCMP	journalArticle	2020	Muraoka, Daisuke; Situo, Deng; Sawada, Shin-ichi; Akiyoshi, Kazunari; Harada, Naozumi; Ikeda, Hiroaki	Identification of a dominant CD8(+) CTL epitope in the SARS-associated coronavirus 2 spike protein	Vaccine		0264-410X	10.1016/j.vaccine.2020.10.039		Coronavirus disease 2019 (COVID-19), which is caused by SARS-CoV-2, has been spreading throughout the world. To date, there are still no approved human vaccines for this disease. To develop an effective vaccine, the establishment of animal models for evaluating post-vaccination immune responses is necessary. In this study, we have identified a CTL epitope in the SARS-CoV-2 spike (S) protein that …	2020/11/17	2022/9/20 11:25	2022/9/20 11:25		7697-7701		49	38		Vaccine								English							Place: Oxford Publisher: Elsevier Sci Ltd WOS:000588128100001				covid-19; SARS-CoV-2; t-cell responses; Spike protein; CTL epitope
PERZTC8K	journalArticle	2020	Mobasheri, Ali	COVID-19, Companion Animals, Comparative Medicine, and One Health	Frontiers in Veterinary Science			10.3389/fvets.2020.00522		The COVID-19 pandemic in 2020 has stimulated open collaboration between different scientific and clinical disciplines like never before. Public and private partnerships continue to form in order to tackle this unprecedented global challenge. This paper highlights the importance of open collaboration and cooperation between the disciplines of medicine, veterinary medicine, and animal health scienc…	2020/8/14	2022/9/20 11:25	2022/9/20 11:25		522			7		Front. Vet. Sci.								English							Place: Lausanne Publisher: Frontiers Media Sa WOS:000566081500001				covid-19; SARS-CoV2; companion animal; One Health; canine coronavirus; comparative medicine; gs-5734); Remdesivir (RDV; zoo animal
G2Q6SP4R	journalArticle	2020	Robson, B.	COVID-19 Coronavirus spike protein analysis for synthetic vaccines, a peptidomimetic antagonist, and therapeutic drugs, and analysis of a proposed achilles' heel conserved region to minimize probability of escape mutations and drug resistance	Computers in Biology and Medicine		0010-4825	10.1016/j.compbiomed.2020.103749		This paper continues a recent study of the spike protein sequence of the COVID-19 virus (SARS-CoV-2). It is also in part an introductory review to relevant computational techniques for tackling viral threats, using COVID-19 as an example. Q-UEL tools for facilitating access to knowledge and bioinformatics tools were again used for efficiency, but the focus in this paper is even more on the virus.…	20-Jun	2022/9/20 11:25	2022/9/20 11:25		103749			121		Comput. Biol. Med.								English							Place: Oxford Publisher: Pergamon-Elsevier Science Ltd WOS:000542187300002				covid-19; SARS-CoV-2; Coronavirus; entry; 2019-nCoV; networks; inhibitors; sars coronavirus; 11-beta-hydroxysteroid dehydrogenase type-1; Bionformatics; expert system; inference language; novo molecular design; Peptidomimetic; pro-ligand; Q-UEL language; Retroinverso; Synthetic vaccine; universal exchange; Wuhan seafood market coronavirus
HN46IQD2	journalArticle	2020	McClung, Nancy; Chamberland, Mary; Kinlaw, Kathy; Matthew, Dayna Bowen; Wallace, Megan; Bell, Beth P.; Lee, Grace M.; Talbot, H. Keipp; Romero, Jose R.; Oliver, Sara E.; Dooling, Kathleen	The Advisory Committee on Immunization Practices' Ethica Principles for Allocating Initial Supplies of COVID-19 Vaccine - United States, 2020	Mmwr-Morbidity and Mortality Weekly Report		0149-2195				2020/11/27	2022/9/20 11:25	2022/9/20 11:25		1782-1786		47	69		MMWR-Morb. Mortal. Wkly. Rep.								English							Place: Atlanta Publisher: Centers Disease Control & Prevention WOS:000596482400006				recommendations
NYEUHSV4	journalArticle	2020	Hoque, M. Nazmul; Chaudhury, Abed; Akanda, Md Abdul Mannan; Hossain, M. Anwar; Islam, Md Tofazzal	Genomic diversity and evolution, diagnosis, prevention, and therapeutics of the pandemic COVID-19 disease	Peerj		2167-8359	10.7717/peerj.9689		The coronavirus disease 19 (COVID-19) is a highly transmittable and pathogenic viral infection caused by a novel evolutionarily divergent RNA virus, the severe acute respiratory syndrome coronavirus 2 (SARS-CoV-2). The virus first emerged in Wuhan, China in December 2019, and subsequently spreaded around the world. Genomic analyses revealed that this zoonotic virus may be evolved naturally but no…	2020/9/1	2022/9/20 11:25	2022/9/20 11:25		e9689			8		PeerJ								English							Place: London Publisher: Peerj Inc WOS:000564476600002				SARS-CoV-2; mers-cov; neutralizing antibodies; sars-cov-2; transmission; binding; sars; acute respiratory syndrome; Vaccines; spike protein; Therapeutics; Diagnostics; Genetic diversity; Genome evolution; pneumonia outbreak; syndrome coronavirus
LQ52NHAB	journalArticle	2020	Wec, Anna Z.; Wrapp, Daniel; Herbert, Andrew S.; Maurer, Daniel P.; Haslwanter, Denise; Sakharkar, Mrunal; Jangra, Rohit K.; Dieterle, M. Eugenia; Lilov, Asparouh; Huang, Deli; Tse, Longping; Johnson, Nicole; Hsieh, Ching-Lin; Wang, Nianshuang; Nett, Juergen H.; Champney, Elizabeth; Burnina, Irina; Brown, Michael; Lin, Shu; Sinclair, Melanie; Johnson, Carl; Pudi, Sarat; Bortz, Robert; Wirchniansk…	Broad neutralization of SARS-related viruses by human monoclonal antibodies	Science		0036-8075	10.1126/science.abc7424		Broadly protective vaccines against known and preemergent human coronaviruses (HCoVs) are urgently needed. To gain a deeper understanding of cross-neutralizing antibody responses, we mined the memory B cell repertoire of a convalescent severe acute respiratory syndrome (SARS) donor and identified 200 SARS coronavirus 2 (SARS-CoV-2) binding antibodies that target multiple conserved sites on the sp…	2020/8/7	2022/9/20 11:25	2022/9/20 11:25		731-+		6504	369		Science								English							Place: Washington Publisher: Amer Assoc Advancement Science WOS:000559184400053				spike; sars-cov-2
FCBL6TBV	journalArticle	2020	Santibanez-Moran, Marisa G.; Lopez-Lopez, Edgar; Prieto-Martinez, Fernando D.; Sanchez-Cruz, Norberto; Medina-Franco, Jose L.	Consensus virtual screening of dark chemical matter and food chemicals uncover potential inhibitors of SARS-CoV-2 main protease	Rsc Advances			10.1039/d0ra04922k		The pandemic caused by SARS-CoV-2 (COVID-19 disease) has claimed more than 500 000 lives worldwide, and more than nine million people are infected. Unfortunately, an effective drug or vaccine for its treatment is yet to be found. The increasing information available on critical molecular targets of SARS-CoV-2 and active compounds against related coronaviruses facilitates the proposal (or repurpos…	2020/7/2	2022/9/20 11:25	2022/9/20 11:25		25089-25099		42	10		RSC Adv.								English							Place: Cambridge Publisher: Royal Soc Chemistry WOS:000545357500029				fusion; sars; docking; combination
HKFGCWVZ	journalArticle	2020	Chi, Xiangyang; Yan, Renhong; Zhang, Jun; Zhang, Guanying; Zhang, Yuanyuan; Hao, Meng; Zhang, Zhe; Fan, Pengfei; Dong, Yunzhu; Yang, Yilong; Chen, Zhengshan; Guo, Yingying; Zhang, Jinlong; Li, Yaning; Song, Xiaohong; Chen, Yi; Xia, Lu; Fu, Ling; Hou, Lihua; Xu, Junjie; Yu, Changming; Li, Jianmin; Zhou, Qiang; Chen, Wei	A neutralizing human antibody binds to the N-terminal domain of the Spike protein of SARS-CoV-2	Science		0036-8075	10.1126/science.abc6952		Developing therapeutics against severe acute respiratory syndrome coronavirus 2 (SARS-CoV-2) could be guided by the distribution of epitopes, not only on the receptor binding domain (RBD) of the Spike (S) protein but also across the full Spike (S) protein. We isolated and characterized monoclonal antibodies (mAbs) from 10 convalescent COVID-19 patients. Three mAbs showed neutralizing activities a…	2020/8/7	2022/9/20 11:25	2022/9/20 11:25		650-+		6504	369		Science								English							Place: Washington Publisher: Amer Assoc Advancement Science WOS:000559184400038				coronavirus; vaccines; pneumonia; activation; entry; cryo-em structure; ace2; functional receptor; features; phylogenies
LTVM9KGS	journalArticle	2020	Noh, Ji Yun; Seong, Hye; Yoon, Jin Gu; Song, Joon Young; Cheong, Hee Jin; Kim, Woo Joo	Social Distancing against COVID-19: Implication for the Control of Influenza	Journal of Korean Medical Science		1011-8934	10.3346/jkms.2020.35.e182		Social distancing has been adopted as one of basic protective measures against coronavirus disease 2019 (COVID-19). During 2019-2020 season, influenza epidemic period was exceptionally short and epidemic peak was low in comparison with previous seasons in Korea. Influenza epidemic pattern was bimodal in 2016-2017 and 2018-2019 seasons, however, influenza viruses have rarely been circulating in sp…	2020/5/18	2022/9/20 11:25	2022/9/20 11:25		e182		19	35		J. Korean Med. Sci.								English							Place: Seoul Publisher: Korean Acad Medical Sciences WOS:000534590700007				Influenza; Coronavirus Disease 2019; Social Distancing
MWHTCADC	journalArticle	2020	Pult, Heiko	COVID-19 Pandemic: Survey of future use of personal protective equipment in optometric practice	Contact Lens & Anterior Eye		1367-0484	10.1016/j.clae.2020.04.006		Purpose: The aim of this project was to evaluate which personal protective equipment (PPE) eye care practitioners (ECP) will use during the next months and also what they will ask the patient to use in clinical practice. Methods: A social-media survey was carried out, asking 257 optometrists and opticians in Germany, Austria and Switzerland (i) which PPE they intended to use in the future (after …	20-Jun	2022/9/20 11:25	2022/9/20 11:25		208-210		3	43		Contact Lens Anterior Eye								English							Place: Amsterdam Publisher: Elsevier WOS:000536577600004				covid-19; Survey; Personal protective equipment; Eye care practitioners
GW6UIV4I	journalArticle	2020	Grech, Victor; Borg, Michael	Influenza vaccination in the COVID-19 era	Early Human Development		0378-3782	10.1016/j.earlhumdev.2020.105116		Influenza spreads globally annually with significant paediatric and adult attack rates and considerable morbidity, mortality and the exacerbation of extant chronic disease. In the northern and southern hemispheres, outbreaks occur mainly in the respective winter seasons. Influenza vaccination is available but only partially effective. In the absence of a vaccine, in winter, novel coronavirus COVI…	20-Sep	2022/9/20 11:25	2022/9/20 11:25		105116			148		Early Hum. Dev.								English							Place: Clare Publisher: Elsevier Ireland Ltd WOS:000556727000008				mortality
LUX6EV4Z	journalArticle	2020	Brouwer, Philip J. M.; Caniels, Tom G.; van der Straten, Karlijn; Snitselaar, Jonne L.; Aldon, Yoann; Bangaru, Sandhya; Torres, Jonathan L.; Okba, Nisreen M. A.; Claireaux, Mathieu; Kerster, Gius; Bentlage, Arthur E. H.; van Haaren, Marlies M.; Guerra, Denise; Burger, Judith A.; Schermer, Edith E.; Verheul, Kirsten D.; van der Velde, Niels; van der Kooi, Alex; van Schooten, Jelle; van Breemen, Ma…	Potent neutralizing antibodies from COVID-19 patients define multiple targets of vulnerability	Science		0036-8075	10.1126/science.abc5902		The rapid spread of severe acute respiratory syndrome coronavirus 2 (SARS-CoV-2) has had a large impact on global health, travel, and economy. Therefore, preventative and therapeutic measures are urgently needed. Here, we isolated monoclonal antibodies from three convalescent coronavirus disease 2019 (COVID-19) patients using a SARS-CoV-2 stabilized prefusion spike protein. These antibodies had l…	2020/8/7	2022/9/20 11:25	2022/9/20 11:25		643-+		6504	369		Science								English							Place: Washington Publisher: Amer Assoc Advancement Science WOS:000559184400037				therapy; mers-cov; spike; monoclonal-antibody; binding; immunogenicity; cryo-em structure; system; sars coronavirus
LWLBMNQ6	journalArticle	2020	Larsen, Frederik T.; Guldbrandtsen, Bernt; Christensen, Dennis; Pitcovski, Jacob; Kjaerup, Rikke B.; Dalgaard, Tina S.	Pustulan Activates Chicken Bone Marrow-Derived Dendritic Cells In Vitro and Promotes Ex Vivo CD4(+)T Cell Recall Response to Infectious Bronchitis Virus	Vaccines			10.3390/vaccines8020226		Infectious bronchitis virus (IBV) is a highly contagious avian coronavirus. IBV causes substantial worldwide economic losses in the poultry industry. Vaccination with live-attenuated viral vaccines, therefore, are of critical importance. Live-attenuated viral vaccines, however, exhibit the potential for reversion to virulence and recombination with virulent field strains. Therefore, alternatives …	20-Jun	2022/9/20 11:25	2022/9/20 11:25		226		2	8		Vaccines								English							Place: Basel Publisher: Mdpi WOS:000550922800001				vaccination; adjuvant; maturation; immune-response; recognition; beta-glucans; APC-targeting; avian influenza-virus; bm-dc; chicken; cytokine production; dc-sign; dectin-1; ibv; lectin receptors; pustulan; subunit vaccination
BJ2N6AMB	journalArticle	2020	Di Cosimo, Serena; Malfettone, Andrea; Perez-Garcia, Jose M.; Llombart-Cussac, Antonio; Miceli, Rosalba; Curigliano, Giuseppe; Cortes, Javier	Immune checkpoint inhibitors: a physiology-driven approach to the treatment of coronavirus disease 2019	European Journal of Cancer		0959-8049	10.1016/j.ejca.2020.05.026		While confirmed cases of the deadly coronavirus disease 2019 (COVID-19) have exceeded 4.7 million globally, scientists are pushing forward with efforts to develop vaccines and treatments in an attempt to slow the pandemic and lessen the disease's damage. Although no proven effective therapies for treating patients with COVID-19 or for managing their complications currently exist, the rapidly expa…	20-Aug	2022/9/20 11:25	2022/9/20 11:25		62-65			135		Eur. J. Cancer								English							Place: Oxford Publisher: Elsevier Sci Ltd WOS:000550136400010				covid-19; SARS-CoV-2; Cytokine storm; Tocilizumab; blockade; AntieIL-6R; AntiePD-1; Pembrolizumab
XIAUYBYX	journalArticle	2021	Mveang Nzoghe, Amandine; Essone, Paulin N.; Leboueny, Marielle; Maloupazoa Siawaya, Anicet Christel; Bongho, Eliode Cyrien; Mvoundza Ndjindji, Ofilia; Avome Houechenou, Rotimi Myrabelle; Agnandji, Selidji Todagbe; Djoba Siawaya, Joel Fleury	Evidence and implications of pre-existing humoral cross-reactive immunity to SARS-CoV-2	Immunity Inflammation and Disease			10.1002/iid3.367		Background: Severe acute respiratory syndrome coronavirus 2 (SARS-CoV-2) has emerged throughout the world. Building knowledge around Covid-19 is crucial to devise facts based approaches to respond efficiently against this pandemic. Aim: We aimed to investigate pre-existing humoral cross-reactive immunity to SARS-CoV-2. Method: We have tested the reactivity against SARS-CoV-2 nucleocapsid (N) anti…	21-Mar	2022/9/20 11:25	2022/9/20 11:25		128-133		1	9		IMMUN. INFLAMM. DIS.								English							Place: Hoboken Publisher: Wiley WOS:000598627100001
YKIVCSAK	journalArticle	2020	Kreps, Sarah; Prasad, Sandip; Brownstein, John S.; Hswen, Yulin; Garibaldi, Brian T.; Zhang, Baobao; Kriner, Douglas L.	Factors Associated With US Adults' Likelihood of Accepting COVID-19 Vaccination	Jama Network Open		2574-3805	10.1001/jamanetworkopen.2020.25594		Importance The development of a coronavirus disease 2019 (COVID-19) vaccine has progressed at unprecedented speed. Widespread public uptake of the vaccine is crucial to stem the pandemic. Objective To examine the factors associated with survey participants' self-reported likelihood of selecting and receiving a hypothetical COVID-19 vaccine. Design, Setting, and Participants A survey study of a no…	2020/10/20	2022/9/20 11:25	2022/9/20 11:25		e2025594		10	3		JAMA Netw. Open								English							Place: Chicago Publisher: Amer Medical Assoc WOS:000586431300007				risk; children; influenza; discrete-choice experiments; preferences; sample-size
LBX3A3YI	journalArticle	2020	Seong, Jin-Taek	Group Testing-Based Robust Algorithm for Diagnosis of COVID-19	Diagnostics			10.3390/diagnostics10060396		At the time of writing, the COVID-19 infection is spreading rapidly. Currently, there is no vaccine or treatment, and researchers around the world are attempting to fight the infection. In this paper, we consider a diagnosis method for COVID-19, which is characterized by a very rapid rate of infection and is widespread. A possible method for avoiding severe infections is to stop the spread of the…	20-Jun	2022/9/20 11:25	2022/9/20 11:25		396		6	10		Diagnostics								English							Place: Basel Publisher: Mdpi WOS:000551260400001				covid-19; diagnosis; bounds; codes; group testing; posterior probability; robust algorithm
UQNWH6XL	journalArticle	2020	Banik, Arindam; Nag, Tirthankar; Chowdhury, Sahana Roy; Chatterjee, Rajashri	Why Do COVID-19 Fatality Rates Differ Across Countries? An Explorative Cross-country Study Based on Select Indicators	Global Business Review		0972-1509	10.1177/0972150920929897		In this article, we analyse the factors that determine the fatality rates across 29 economies spread across both the developing and developed world. Recent emerging literature and expert opinions in popular media have indicated various factors that may explain cross-country difference in fatality rates. These factors range from access to public health infrastructure, BCG vaccination policies, dem…	20-Jun	2022/9/20 11:25	2022/9/20 11:25		607-625		3	21		Glob. Bus. Rev.								English							Place: London Publisher: Sage Publications Ltd WOS:000533114100001				covid-19; public health; China; Germany; Europe; South Korea; fatality rate; usa; aged population; BCG vaccination policy
QHLILY28	journalArticle	2020	Castel, Amanda D.; Wilbourn, Brittany; Magnus, Manya; Greenberg, Alan E.	SARS-CoV-2 and HIV: Epidemiology, Treatment, and Lessons Learned from HIV	Aids Reviews		1139-6121	10.24875/AIDSRev.20000070		Severe acute respiratory syndrome coronavirus 2 (SARS-CoV-2), the cause of COVID-19, was first detected in China in December 2019 and has rapidly spread throughout the world. Globally, the impact of COVID-19 has been severe with more than half a million deaths over 6 months; in contrast, the HIV pandemic has resulted in over 32 million deaths worldwide over 40 years. This paper reviews the curren…	20-Sep	2022/9/20 11:25	2022/9/20 11:25		133-142		3	22		Aids Rev.								English							Place: Barcelona Publisher: Permanyer Publ WOS:000734204200002				covid-19; SARS-CoV-2; infection; Epidemiology; Pandemic; hiv; disease 2019 covid-19
I6EAEW9Z	journalArticle	2020	Alharbi, Naif Khalaf; Ibrahim, Osman H.; Alhafufi, Ali; Kasem, Samy; Aldowerij, Ali; Albrahim, Raed; Abu-obaidah, Ali; Alkarar, Ali; Bayoumi, Faisal Altaib; Almansour, Ali Mohammed; Aldubaib, Musaad; Al-Abdely, Hail; Balkhy, Hanan H.; Qasim, Ibrahim	Challenge infection model for MERS-CoV based on naturally infected camels	Virology Journal			10.1186/s12985-020-01347-5		Background Middle East Respiratory Syndrome coronavirus (MERS-CoV) is an emerging virus that infects humans and camels with no approved antiviral therapy or vaccine. Some vaccines are in development for camels as a one-health intervention where vaccinating camels is proposed to reduce human viral exposure. This intervention will require an understanding of the prior exposure of camels to the viru…	2020/6/17	2022/9/20 11:25	2022/9/20 11:25		77		1	17		Virol. J.								English							Place: London Publisher: Bmc WOS:000542872900001				antibodies; Saudi Arabia; replication; respiratory syndrome coronavirus; Seroprevalence; dromedary camels; MERS-CoV; Vaccine efficacy; Challenge model; Dromedary camels
WE3QVKRF	journalArticle	2020	King, Andy J.; Burke, Louise M.; Halson, Shona L.; Hawley, John A.	The Challenge of Maintaining Metabolic Health During a Global Pandemic	Sports Medicine		0112-1642	10.1007/s40279-020-01295-8		The ongoing global pandemic brought on by the spread of the novel coronavirus SARS-CoV-2 is having profound effects on human health and well-being. With no viable vaccine presently available and the virus being rapidly transmitted, governments and national health authorities have acted swiftly, recommending 'lockdown' policies and/or various levels of social restriction/isolation to attenuate the…	20-Jul	2022/9/20 11:25	2022/9/20 11:25		1233-1241		7	50		Sports Med.								English							Place: Northcote Publisher: Adis Int Ltd WOS:000535155100001				time; adults; sleep; physical-activity; exercise; appetite; high-fat; intraindividual variability; meals; physiological adaptations
K87YCZNX	journalArticle	2020	Mohammed, Ali Haider; Blebil, Ali; Dujaili, Juman; Rasool-Hassan, Bassam A.	The Risk and Impact of COVID-19 Pandemic on Immunosuppressed Patients: Cancer, HIV, and Solid Organ Transplant Recipients	Aids Reviews		1139-6121	10.24875/AIDSRev.20000052		Toward the end of the year 2019, there was the eruption of an acute respiratory syndrome, which is widely referred as coronavirus disease (COVID-19) from Wuhan, Hubei Province. The disease causes a range of respiratory illnesses, which are fatal. The COVID-19 disease has spread globally and has significantly impacted the health delivery systems, travel regulations, and economic activities and has…	20-Sep	2022/9/20 11:25	2022/9/20 11:25		151-157		3	22		Aids Rev.								English							Place: Barcelona Publisher: Permanyer Publ WOS:000734204200005				covid-19; Cancer; hiv; Solid organ transplants
9MQFJ7AP	journalArticle	2020	Baby, Krishnaprasad; Maity, Swastika; Mehta, Chetan; Suresh, Akhil; Nayak, Usha Y.; Nayak, Yogendra	In Silico Drug Repurposing of Penicillins to Target Main Protease M-pr(o) SARS-CoV-2	Pharmaceutical Sciences		1735-403X	10.34172/PS.2020.44		Background: SARS coronavirus-2 (SARS-CoV-2) infection causes Novel Coronavirus Disease (COVID-19). It is a respiratory tract infection and currently becoming pandemic worldwide affecting more than 50 lakh people. As of now, there is no treatment or vaccine developed for disease management. The main protease, M-pro in SARS-CoV-2 is a druggable target explored by many scientists. We targeted this w…	20-Nov	2022/9/20 11:25	2022/9/20 11:25		S52-S62			26		Pharm. Sci.								English							Place: Tabriz Publisher: Tabriz Univ Medical Sciences, Fac Pharmacy WOS:000605230500007				covid-19; SARS-CoV-2; coronavirus; inhibitors; M-pro; Virtual screening; glide; accurate docking; Beta-lactams; Viral protease
EFE9BHFT	journalArticle	2020	Morse, Jared S.; Lalonde, Tyler; Xu, Shiqing; Liu, Wenshe Ray	Learning from the Past: Possible Urgent Prevention and Treatment Options for Severe Acute Respiratory Infections Caused by 2019-nCoV	Chembiochem		1439-4227	10.1002/cbic.202000047		With the current trajectory of the 2019-nCoV outbreak unknown, public health and medicinal measures will both be needed to contain spreading of the virus and to optimize patient outcomes. Although little is known about the virus, an examination of the genome sequence shows strong homology with its better-studied cousin, SARS-CoV. The spike protein used for host cell infection shows key nonsynonym…	2020/3/2	2022/9/20 11:25	2022/9/20 11:25		730-738		5	21		ChemBioChem								English							Place: Weinheim Publisher: Wiley-V C H Verlag Gmbh WOS:000515400100001				vaccine; identification; coronavirus; sars; spike protein; receptor-binding domain; 2019-nCoV; cov; antiviral agents; potent; sars-coronavirus; papain-like protease; RdRp; 3CLpro; ribavirin; aurintricarboxylic acid; spike proteins
S5TDYIWN	journalArticle	2020	Wakefield, Jonathan; Okonek, Taylor; Pedersen, Jon	Small Area Estimation for Disease Prevalence Mapping	International Statistical Review		0306-7734	10.1111/insr.12400		Small area estimation (SAE) entails estimating characteristics of interest for domains, often geographical areas, in which there may be few or no samples available. SAE has a long history and a wide variety of methods have been suggested, from a bewildering range of philosophical standpoints. We describe design-based and model-based approaches and models that are specified at the area level and a…	20-Aug	2022/9/20 11:25	2022/9/20 11:25		398-418		2	88		Int. Stat. Rev.								English							Place: Hoboken Publisher: Wiley WOS:000551471600001				mortality; model; africa; design; inference; vaccination coverage; income; area-level models; Bayesian methods; complex survey data; complex surveys; design-based inference; direct estimation; indirect estimation; model-based inference; spatial smoothing; under-5; unit-level models; weighting
EK3Q22Q9	journalArticle	2020	Loes, Andrea N.; Gentles, Lauren E.; Greaney, Allison J.; Crawford, Katharine H. D.; Bloom, Jesse D.	Attenuated Influenza Virions Expressing the SARS-CoV-2 Receptor-Binding Domain Induce Neutralizing Antibodies in Mice	Viruses-Basel			10.3390/v12090987		An effective vaccine is essential for controlling the spread of the SARS-CoV-2 virus. Here, we describe an influenza virus-based vaccine for SARS-CoV-2. We incorporated a membrane-anchored form of the SARS-CoV-2 spike receptor binding domain (RBD) in place of the neuraminidase (NA) coding sequence in an influenza virus also possessing a mutation that reduces the affinity of hemagglutinin for its …	20-Sep	2022/9/20 11:25	2022/9/20 11:25		987		9	12		Viruses-Basel								English							Place: Basel Publisher: Mdpi WOS:000580342700001				SARS-CoV-2; vaccination; spike; protection; model; immunization; influenza; generation; rbd; cell; intranasal; live; a virus; neuraminidase; live attenuated vaccine; mutant
D3IVIVXP	journalArticle	2020	Jain, S. Lochlann	The WetNet: What the Oral Polio Vaccine Hypothesis Exposes about Globalized Interspecies Fluid Bonds	Medical Anthropology Quarterly		0745-5194	10.1111/maq.12587		The author analyzes the aftermath of Edward Hooper's suggestion that the trial of an oral polio vaccine (OPV) in the Belgian colonies of Africa engendered the pandemic form of the AIDS virus, HIV-1. In response to Hooper's book, The River(1999), the Royal Society in London held a conference to debate the origins of HIV. Examination of the quick dismissal of the OPV theory opens a space for legiti…	20-Dec	2022/9/20 11:25	2022/9/20 11:25		504-524		4	34		Med. Anthropol. Q.								English							Place: Hoboken Publisher: Wiley WOS:000541183100001				Africa; origin; zoonosis; hiv/aids; attenuated poliomyelitis virus; congo; experimentality; HIV origins; sv40; The WetNet
6RDLSSHF	journalArticle	2020	Ong, Edison; Huang, Xiaoqiang; Pearce, Robin; Zhang, Yang; He, Yongqun	Computational design of SARS-CoV-2 spike glycoproteins to increase immunogenicity by T cell epitope engineering	Computational and Structural Biotechnology Journal		2001-0370	10.1016/j.csbj.2020.12.039		The development of effective and safe vaccines is the ultimate way to efficiently stop the ongoing COVID19 pandemic, which is caused by severe acute respiratory syndrome coronavirus 2 (SARS-CoV-2). Built on the fact that SARS-CoV-2 utilizes the association of its Spike (S) protein with the human angiotensinconverting enzyme 2 (ACE2) receptor to invade host cells, we computationally redesigned the…	2020	2022/9/20 11:25	2022/9/20 11:25		518-529			19		Comp. Struct. Biotechnol. J..								English							Place: Amsterdam Publisher: Elsevier WOS:000684852600004				covid-19; responses; vaccine; Vaccine; domain; protein; alignment; neutralization; sars coronavirus; Spike glycoprotein; interface; Epitope engineering; EvoDesign; Structural vaccinology
DV4IJJ64	journalArticle	2020	Polack, Fernando P.; Thomas, Stephen J.; Kitchin, Nicholas; Absalon, Judith; Gurtman, Alejandra; Lockhart, Stephen; Perez, John L.; Perez Marc, Gonzalo; Moreira, Edson D.; Zerbini, Cristiano; Bailey, Ruth; Swanson, Kena A.; Roychoudhury, Satrajit; Koury, Kenneth; Li, Ping; Kalina, Warren V.; Cooper, David; Frenck, Robert W.; Hammitt, Laura L.; Tureci, Ozlem; Nell, Haylene; Schaefer, Axel; Unal, S…	Safety and Efficacy of the BNT162b2 mRNA Covid-19 Vaccine	New England Journal of Medicine		0028-4793	10.1056/NEJMoa2034577		BACKGROUND Severe acute respiratory syndrome coronavirus 2 (SARS-CoV-2) infection and the resulting coronavirus disease 2019 (Covid-19) have afflicted tens of millions of people in a worldwide pandemic. Safe and effective vaccines are needed urgently. METHODS In an ongoing multinational, placebo-controlled, observer-blinded, pivotal efficacy trial, we randomly assigned persons 16 years of age or …	2020/12/31	2022/9/20 11:25	2022/9/20 11:25		2603-2615		27	383		N. Engl. J. Med.								English							Place: Waltham Publisher: Massachusetts Medical Soc WOS:000605648000010
2BDHA2SR	journalArticle	2020	Ku, Keun Bon; Shin, Hye Jin; Kim, Hae Soo; Kim, Bum-Tae; Kim, Seong-Jun; Kim, Chonsaeng	Repurposing Screens of FDA-Approved Drugs Identify 29 Inhibitors of SARS-CoV-2	Journal of Microbiology and Biotechnology		1017-7825	10.4014/jmb.2009.09009		COVID-19, caused by the novel coronavirus SARS-CoV-2, has spread globally and caused serious social and economic problems. The WHO has declared this outbreak a pandemic. Currently, there are no approved vaccines or antiviral drugs that prevent SARS-CoV-2 infection. Drugs already approved for clinical use would be ideal candidates for rapid development as COVID-19 treatments. In this work, we scre…	20-Dec	2022/9/20 11:25	2022/9/20 11:25		1843-1853		12	30		J. Microbiol. Biotechnol.								English							Place: Seoul Publisher: Korean Soc Microbiology & Biotechnology WOS:000604389200007				covid-19; SARS-CoV-2; mortality; coronavirus; virus; FDA-approved drugs; flunarizine; micafungin; prophylactic drug; repurposing screens
55IMW5ZL	journalArticle	2020	Saunders, Nell; Planas, Delphine; Bolland, William H.; Rodriguez, Christophe; Fourati, Slim; Buchrieser, Julian; Planchais, Cyril; Prot, Matthieu; Staropoli, Isabelle; Guivel-Benhassine, Florence; Porrot, Francoise; Veyer, David; Pere, Helene; Robillard, Nicolas; Saliba, Madelina; Baidaliuk, Artem; Seve, Aymeric; Hocqueloux, Laurent; Prazuck, Thierry; Rey, Felix A.; Mouquet, Hugo; Simon-Loriere, …	Fusogenicity and neutralization sensitivity of the SARS-CoV-2 Delta sublineage AY.4.2	Ebiomedicine		2352-3964	10.1016/j.ebiom.2022.103934		Background SARS-CoV-2 lineages are continuously evolving. As of December 2021, the AY.4.2 Delta sub-lineage represented 20 % of sequenced strains in the UK and had been detected in dozens of countries. It has since then been supplanted by Omicron. The AY.4.2 spike displays three additional mutations (T95I, Y145H and A222V) in the N-terminal domain when compared to the original Delta variant (B.1.…	20-Mar	2022/9/20 11:25	2022/9/20 11:25		103934			77		EBioMedicine								English							Place: Amsterdam Publisher: Elsevier WOS:000795937400001				Delta; Neutralization; Vaccines; <p>SARS-CoV-2</p>; ay.4.2; Fusogenicity
VN8DK3R9	journalArticle	2020	Griffith, Evan F.; Pius, Loupa; Manzano, Pablo; Jost, Christine C.	COVID-19 in pastoral contexts in the greater Horn of Africa: Implications and recommendations	Pastoralism-Research Policy and Practice		2041-7136	10.1186/s13570-020-00178-x		COVID-19 is a global pandemic that continues to spread around the world, including to Africa where cases are steadily increasing. The African Centres for Disease Control and Prevention is leading the pandemic response in Africa, with direction from the World Health Organization guidelines for critical preparedness, readiness, and response actions. These are written for national governments, lacki…	2020/10/13	2022/9/20 11:25	2022/9/20 11:25		22		1	10		Pastoralism								English							Place: New York Publisher: Springer WOS:000578224300001				covid-19; surveillance; vaccination; Public health; h5n1; Gender; camel milk; Community one health teams; Food security; Greater horn of Africa; Livelihood security; pathogenic avian influenza
M2PQMUT6	journalArticle	2020	Arora, Gulhima; Arora, Sandeep; Talathi, Abhay; Kandhari, Rajat; Joshi, Vineeta; Langar, Sonali; Nagpal, Smita; Shetty, Vinma H.; Nair, Rakhee V.; Sharma, Divya; Sharma, Rashmi; Sondhi, Prateek	Safer practice of aesthetic dermatology during the COVID-19 pandemic: Recommendations by SIG aesthetics (IADVL Academy)	Indian Dermatology Online Journal		2229-5178	10.4103/idoj.IDOJ_328_20		The COVID-19 pandemic caused by the SARS-CoV-2 virus, has changed the homeostasis of the medical world. In this critical phase, in addition to the general recommendations issued by World Health Organization (WHO) for medical practitioners and health care givers, certain other precautions and safe care practices need to be emphasized which are unique to each branch of medicine. Aesthetic dermatolo…	20-Aug	2022/9/20 11:25	2022/9/20 11:25		534-539		4	11		Indian Dermatol. Online J.								English							Place: Mumbai Publisher: Wolters Kluwer Medknow Publications WOS:000641188200007				covid-19; recommendations; patient; Aesthetic dermatology; teledermatology
4ZUEE74Z	journalArticle	2020	Tsallis, Constantino; Tirnakli, Ugur	Predicting COVID-19 Peaks Around the World	Frontiers in Physics		2296-424X	10.3389/fphy.2020.00217		The official data for the time evolution of active cases of COVID-19 pandemics around the world are available online. For all countries, a peak has been either observed (China and South Korea) or is expected in the near future. The approximate dates and heights of those peaks have important epidemiological implications. Inspired by similar complex behavior of volumes of transactions of stocks at …	2020/5/29	2022/9/20 11:25	2022/9/20 11:25		217			8		Front. Physics								English							Place: Lausanne Publisher: Frontiers Media Sa WOS:000542220300001				covid-19; epidemiology; pandemics; distributions; complex systems; non-extensive statistical mechanics; weibull
RY8QTUND	journalArticle	2020	Aburas, Wejdan; Alshammari, Thamir M.	Pharmacists' roles in emergency and disasters: COVID-19 as an example	Saudi Pharmaceutical Journal		1319-0164	10.1016/j.jsps.2020.11.006		Background: Emergencies and disasters are major threats to health care systems. Coronavirus Disease 2019 (COVID-19) is at the center of a recent emergency situation that requires increased attention from health care professionals, including pharmacists. This study was aimed at providing an overview of pharmacists' roles in disasters and formulating a definition of expected roles and tasks through…	20-Dec	2022/9/20 11:25	2022/9/20 11:25		1797-1816		12	28		Saudi Pharm. J.								English							Place: Amsterdam Publisher: Elsevier WOS:000605479700005				covid-19; vaccination; sars; Emergency; Disasters; Pharmacist; pprr
S9ELVH74	journalArticle	2020	Alrabiaah, Abdulkarim A.; Alshaer, Ahmed H.; Estrella, Stephanie Mae C.; Inclan, Kathrine Ann S.; Aljammaz, Hadeel A.; Almoosa, Khalid M.; Alshuraym, Nawaf F.; Temsah, Mohamad-Hani A.; Alsohime, Fahad M.; Alsubaie, Sara S.; Bukhari, Elham E.; Somily, Ali M.; Alzamil, Fahad A.	Effects of the Coronavirus disease 2019 pandemic on routine pediatric immunization coverage rates at the main University Hospital in Saudi Arabia	Saudi Medical Journal		0379-5284	10.15537/smj.2020.11.25457		Objectives: To investigate whether the coronavirus disease-2019 pandemic has had any effects on pediatric vaccination rates at the main university hospital in Saudi Arabia. Methods: A retrospective study conducted at King Saud University Medical City, Riyadh, Saudi Arabia using electronic health records. The vaccination statuses of all children who were scheduled for vaccinations at birth and at …	20-Nov	2022/9/20 11:25	2022/9/20 11:25		1197-1203		11	41		Saudi Med. J.								English							Place: Riyadh Publisher: Saudi Med J WOS:000597153100005				covid-19; vaccination; childhood
7JQUEQ4E	journalArticle	2020	Lv, Huibin; Wu, Nicholas C.; Tsang, Owen Tak-Yin; Yuan, Meng; Perera, Ranawaka A. P. M.; Leung, Wai Shing; So, Ray T. Y.; Chan, Jacky Man Chun; Yip, Garrick K.; Chik, Thomas Shiu Hong; Wang, Yiquan; Choi, Chris Yau Chung; Lin, Yihan; Ng, Wilson W.; Zhao, Jincun; Poon, Leo L. M.; Peiris, J. S. Malik; Wilson, Ian A.; Mok, Chris K. P.	Cross-reactive Antibody Response between SARS-CoV-2 and SARS-CoV Infections	Cell Reports		2211-1247	10.1016/j.celrep.2020.107725		The World Health Organization has declared the ongoing outbreak of COVID-19, which is caused by a novel coronavirus SARS-CoV-2, a pandemic. There is currently a lack of knowledge about the antibody response elicited from SARS-CoV-2 infection. One major immunological question concerns antigenic differences between SARS-CoV-2 and SARS-CoV. We address this question by analyzing plasma from patients …	2020/6/2	2022/9/20 11:25	2022/9/20 11:25		107725		9	31		Cell Reports								English							Place: Cambridge Publisher: Cell Press WOS:000538168300021				vaccine; coronavirus; receptor; epitope; binding; spike glycoprotein; protect
B78R6NWT	journalArticle	2020	Pavel, Shaikh Terkis Islam; Yetiskin, Hazel; Aydin, Gunsu; Holyavkin, Can; Uygut, Muhammet Ali; Dursun, Zehra Bestepe; Celik, Ilhami; Cevik, Ceren; Ozdarendeli, Aykut	Isolation and characterization of severe acute respiratory syndrome coronavirus 2 in Turkey	Plos One		1932-6203	10.1371/journal.pone.0238614		Coronavirus disease 2019 (COVID-19) caused by severe acute respiratory syndrome coronavirus 2 (SARS-CoV-2) and associated with severe respiratory illness emerged in Wuhan, China, in late 2019. The virus has been able to spread promptly across all continents in the world. The current pandemic has posed a great threat to public health concern and safety. Currently, there are no specific treatments …	2020/9/16	2022/9/20 11:25	2022/9/20 11:25		e0238614		9	15		PLoS One								English							Place: San Francisco Publisher: Public Library Science WOS:000573658000011				sars; alignment
43X9BUQL	journalArticle	2021	Anjum, Faisal Rasheed; Anam, Sidra; Abbas, Ghazanfar; Mahmood, Muhammad Shahid; Rahman, Sajjad Ur; Goraya, Mohsan Ullah; Abdullah, Rana Muhammad; Luqman, Muhammad; Ali, Ashiq; Akram, Muhammad Kamran; Chaudhry, Tamoor Hamid	Type I IFNs: A Blessing in Disguise or Partner in Crime in MERS-CoV-, SARS-CoV-, and SARS-CoV-2-Induced Pathology and Potential Use of Type I IFNs in Synergism with IFN-gamma as a Novel Antiviral Approach Against COVID-19	Viral Immunology		0882-8245	10.1089/vim.2020.0085		Since the end of 2019, the emergence of novel coronavirus disease 2019 (COVID-19) caused by severe acute respiratory syndrome coronavirus 2 (SARS-CoV-2) has accelerated the research on host immune responses toward the coronaviruses. When there is no approved drug or vaccine to use against these culprits, host immunity is the major strategy to fight such infections. Type I interferons are an integ…	2021/6/1	2022/9/20 11:25	2022/9/20 11:25		321-329		5	34		Viral Immunol.								English							Place: New Rochelle Publisher: Mary Ann Liebert, Inc WOS:000590911400001				covid-19; replication; acute respiratory syndrome; mouse hepatitis-virus; double-stranded-rna; antiviral therapy; interferon-beta; syndrome coronavirus; adaptive immune-responses; alpha-interferons; ifn-&#947; immunopathogenic; innate lymphoid-cells; rational design; type I IFNs
5BHJFF5L	journalArticle	2020	Hedayatipour, Ava; Mcfarlane, Nicole	Wearables for the Next Pandemic	Ieee Access		2169-3536	10.1109/ACCESS.2020.3029130		This paper reviews the current state of the art in wearable sensors, including current challenges, that can alleviate the loads on hospitals and medical centers. During the COVID-19 Pandemic in 2020, healthcare systems were overwhelmed by people with mild to severe symptoms needing care. A careful study of pandemics and their symptoms in the past 100 years reveals common traits that should be mon…	2020	2022/9/20 11:25	2022/9/20 11:25		184457-184474			8		IEEE Access								English							Place: Piscataway Publisher: Ieee-Inst Electrical Electronics Engineers Inc WOS:000583566300001				covid-19; pandemic; influenza; Vaccines; health-care; networks; Temperature sensors; wearable devices; energy; Lung; Diseases; iot; device; Bioimpedance; Biomedical monitoring; circuits and systems; cmos temperature sensor; pulse oximetry; sensors; soc; temperature sensor; ultra-low-power; Viruses (medical)
GF4DWDXA	journalArticle	2020	Peng, Sha; Cao, Fengqiang; Xia, Yufei; Gao, Xiao-Dong; Dai, Lianpan; Yan, Jinghua; Ma, Guanghui	Particulate Alum via Pickering Emulsion for an Enhanced COVID-19 Vaccine Adjuvant	Advanced Materials		0935-9648	10.1002/adma.202004210		For rapid response against the prevailing COVID-19 (coronavirus disease 19), it is a global imperative to exploit the immunogenicity of existing formulations for safe and efficient vaccines. As the most accessible adjuvant, aluminum hydroxide (alum) is still the sole employed adjuvant in most countries. However, alum tends to attach on the membrane rather than entering the dendritic cells (DCs), …	20-Oct	2022/9/20 11:25	2022/9/20 11:25		2004210		40	32		Adv. Mater.								English							Place: Weinheim Publisher: Wiley-V C H Verlag Gmbh WOS:000564582700001				SARS-CoV-2; virus; t-cells; design; mers; clearance; alum; cellular immune responses; COVID-19 vaccine adjuvant; microgels; Pickering emulsion
[truncated: 2,004 more rows]
[truncated: 37 more columns]
