# Supplementary material for: A Bibliometric Visualization Analysis on Vaccine Development of Coronavirus Disease 2019 (COVID-19)
Source: Vaccines (Basel). 2023 Jan 29;11(2):295. doi: 10.3390/vaccines11020295 (PMC9959778; doi:10.3390/vaccines11020295)
Supplement: Supplementary file 1 [file vaccines-11-00295-s001.zip › Appendix S4 data from WOS core collection database download published in 2021_10290.csv]

Key	Item Type	Publication Year	Author	Title	Publication Title	ISBN	ISSN	DOI	Url	Abstract Note	Date	Date Added	Date Modified	Access Date	Pages	Num Pages	Issue	Volume	Number Of Volumes	Journal Abbreviation	Short Title	Series	Series Number	Series Text	Series Title	Publisher	Place	Language	Rights	Type	Archive	Archive Location	Library Catalog	Call Number	Extra	Notes	File Attachments	Link Attachments	Manual Tags	Automatic Tags	Editor	Series Editor	Translator	Contributor	Attorney Agent	Book Author	Cast Member	Commenter	Composer
BJYESZUP	journalArticle	2021	Lam, Chun Sing; Koon, Ho Kee; Chung, Vincent Chi-Ho; Cheung, Yin Ting	A public survey of traditional, complementary and integrative medicine use during the COVID-19 outbreak in Hong Kong	Plos One		1932-6203	10.1371/journal.pone.0253890		Background During COVID-19, the public actively sought non-pharmacological and self-management approaches to prevent infection. Little is known on the use of traditional, complementary and integrative medicine (TCIM) by the public as preventive measures. This study investigated the prevalence and patterns of TCIM use during the pandemic, and identified factors associated with its use among the ge…	2021	2022/9/20 10:55	2022/9/20 10:55		e0253890		7	16		PLoS One								English							Place: San Francisco Publisher: Public Library Science WOS:000668791400080				alternative medicine
WN85ACBT	journalArticle	2021	Blakney, Anna K.; McKay, Paul F.; Bouton, Clement R.; Hu, Kai; Samnuan, Karnyart; Shattock, Robin J.	Innate Inhibiting Proteins Enhance Expression and Immunogenicity of Self-Amplifying RNA	Molecular Therapy		1525-0016	10.1016/j.ymthe.2020.11.011		Self-amplifying RNA (saRNA) is a cutting-edge platform for both nucleic acid vaccines and therapeutics. saRNA is self-adjuvanting, as it activates types I and III interferon (IFN), which enhances the immunogenicity of RNA vaccines but can also lead to inhibition of translation. In this study, we screened a library of saRNA constructs with cis-encoded innate inhibiting proteins (IIPs) and determin…	2021/3/3	2022/9/20 10:55	2022/9/20 10:55		1174-1185		3	29		Mol. Ther.								English							Place: Cambridge Publisher: Cell Press WOS:000632041800003
B3P6KYAT	journalArticle	2021	Khan, Adnan; Ali, Mohsin; Iqbal, Wizda; Imran, Mudassar	Effect of high and low risk susceptibles in the transmission dynamics of COVID-19 and control strategies	Plos One		1932-6203	10.1371/journal.pone.0257354		In this study, we formulate and analyze a deterministic model for the transmission of COVID-19 and evaluate control strategies for the epidemic. It has been well documented that the severity of the disease and disease related mortality is strongly correlated with age and the presence of co-morbidities. We incorporate this in our model by considering two susceptible classes, a high risk, and a low…	2021/9/15	2022/9/20 10:55	2022/9/20 10:55		e0257354		9	16		PLoS One								English							Place: San Francisco Publisher: Public Library Science WOS:000707084400032				model
W6VV56V6	journalArticle	2021	Kroeger, M.; Schlickeiser, R.	Verification of the accuracy of the SIR model in forecasting based on the improved SIR model with a constant ratio of recovery to infection rate by comparing with monitored second wave data	Royal Society Open Science		2054-5703	10.1098/rsos.211379		The temporal evolution of second and subsequent waves of epidemics such as Covid-19 is investigated. Analytic expressions for the peak time and asymptotic behaviours, early doubling time, late half decay time, and a half-early peak law, characterizing the dynamical evolution of number of cases and fatalities, are derived, where the pandemic evolution exhibiting multiple waves is described by the …	2021/9/22	2022/9/20 10:55	2022/9/20 10:55		211379		9	8		R. Soc. Open Sci.								English							Place: London Publisher: Royal Soc WOS:000697644700010				approximate solution; Coronavirus; covid-19; disease; epidemic model; extrapolation; pandemic spreading; parameter estimation; predictions; spread; statistical analysis
V5AV8G6L	journalArticle	2022	Coccia, Mario	Preparedness of countries to face COVID-19 pandemic crisis: Strategic positioning and factors supporting effective strategies of prevention of pandemic threats	Environmental Research		0013-9351	10.1016/j.envres.2021.111678		The Coronavirus Disease 2019 (COVID-19) continues to generate a constant pandemic threat with new mutations of the viral agent (SARS-CoV-2) that create socioeconomic issues. One of the fundamental problems is the evaluation of the preparedness of countries to cope with COVID-19 pandemic crisis to detect and support factors associated with the reduction of mortality and the growth of vaccinations …	Jan-22	2022/9/20 10:55	2022/9/20 10:55		111678			203		Environ. Res.								English							Place: San Diego Publisher: Academic Press Inc Elsevier Science WOS:000704706500002				covid-19; acceptance; advisory-committee; Biological security; Coronavirus infections; Country monitoring; COVID-19 vaccine uptake; Crisis management; Governance; Health systems; Health systems resilience; Healthcare sector; Pandemic response; Population size; practices interim recommendation; Preparedness; Preventing transmission; Public health; Public health capacity; Risk assessment; SARS-CoV-…
QH2H25WR	journalArticle	2021	Pradenas, Edwards; Trinite, Benjamin; Urrea, Victor; Marfil, Silvia; Avila-Nieto, Carlos; Rodriguez de la Concepcion, Maria Luisa; Tarres-Freixas, Ferran; Perez-Yanes, Silvia; Rovirosa, Carla; Ainsua-Enrich, Erola; Rodon, Jordi; Vergara-Alert, Julia; Segales, Joaquim; Guallar, Victor; Valencia, Alfonso; Izquierdo-Useros, Nuria; Paredes, Roger; Mateu, Lourdes; Chamorro, Anna; Massanella, Marta; Ca…	Stable neutralizing antibody levels 6 months after mild and severe COVID-19 episodes	Med		2666-6340	10.1016/j.medj.2021.01.005		Background: Understanding mid-term kinetics of immunity to SARS-CoV-2 is the cornerstone for public health control of the pandemic and vaccine development. However, current evidence is rather based on limited measurements, losing sight of the temporal pattern of these changes. Methods: We conducted a longitudinal analysis on a prospective cohort of COVID-19 patients followed up for >6 months. Neu…	2021/3/12	2022/9/20 10:55	2022/9/20 10:55		313-+		3	2		Med								English							Place: Amsterdam Publisher: Elsevier WOS:000658575700010				sars-cov-2
4MKUL48B	journalArticle	2021	Bartsch, Sarah M.; O'Shea, Kelly J.; Wedlock, Patrick T.; Strych, Ulrich; Ferguson, Marie C.; Bottazzi, Maria Elena; Randall, Samuel L.; Siegmund, Sheryl S.; Cox, Sarah N.; Hotez, Peter J.; Lee, Bruce Y.	The Benefits of Vaccinating With the First Available COVID-19 Coronavirus Vaccine	American Journal of Preventive Medicine		0749-3797	10.1016/j.amepre.2021.01.001		Introduction: During a pandemic, there are many situations in which the first available vaccines may not have as high effectiveness as vaccines that are still under development or vaccines that are not yet ready for distribution, raising the question of whether it is better to go with what is available now or wait. Methods: In 2020, the team developed a computational model that represents the U.S…	May-21	2022/9/20 10:55	2022/9/20 10:55		605-613		5	60		Am. J. Prev. Med.								English							Place: New York Publisher: Elsevier Science Inc WOS:000641993000008
G9WI923J	journalArticle	2021	Uras, Ibrahim Seyda; Ebada, Sherif S.; Korinek, Michal; Albohy, Amgad; Abdulrazik, Basma S.; Wang, Yi-Hsuan; Chen, Bing-Hung; Horng, Jim-Tong; Lin, Wenhan; Hwang, Tsong-Long; Konuklugil, Belma	Anti-Inflammatory, Antiallergic, and COVID-19 Main Protease (M-pro) Inhibitory Activities of Butenolides from a Marine-Derived Fungus Aspergillus terreus	Molecules			10.3390/molecules26113354		In December 2020, the U.K. authorities reported to the World Health Organization (WHO) that a new COVID-19 variant, considered to be a variant under investigation from December 2020 (VUI-202012/01), was identified through viral genomic sequencing. Although several other mutants were previously reported, VUI-202012/01 proved to be about 70% more transmissible. Hence, the usefulness and effectivene…	Jun-21	2022/9/20 10:55	2022/9/20 10:55		3354		11	26		Molecules								English							Place: Basel Publisher: Mdpi WOS:000660416400001				antiallergic; Aspergillus terreus; biosynthesis; butenolides; butyrolactone derivatives; COVID-19 M-pro; elastase; metabolic products; neutrophil; strain; versicolor
AUVM7ILE	journalArticle	2022	Peng, Yanchun; Felce, Suet Ling; Dong, Danning; Penkava, Frank; Mentzer, Alexander J.; Yao, Xuan; Liu, Guihai; Yin, Zixi; Chen, Ji-Li; Lu, Yongxu; Wellington, Dannielle; Wing, Peter A. C.; Dominey-Foy, Delaney C. C.; Jin, Chen; Wang, Wenbo; Abd Hamid, Megat; Fernandes, Ricardo A.; Wang, Beibei; Fries, Anastasia; Zhuang, Xiaodong; Ashley, Neil; Rostron, Timothy; Waugh, Craig; Sopp, Paul; Hublitz, …	An immunodominant NP105-113-B*07:02 cytotoxic T cell response controls viral replication and is associated with less severe COVID-19 disease	Nature Immunology		1529-2908	10.1038/s41590-021-01084-z		NP105-113-B*07:02-specific CD8(+) T cell responses are considered among the most dominant in SARS-CoV-2-infected individuals. We found strong association of this response with mild disease. Analysis of NP105-113-B*07:02-specific T cell clones and single-cell sequencing were performed concurrently, with functional avidity and antiviral efficacy assessed using an in vitro SARS-CoV-2 infection syste…	Jan-22	2022/9/20 10:55	2022/9/20 10:55		50-+		1	23		Nat. Immunol.								English							Place: Berlin Publisher: Nature Portfolio WOS:000724647800001				sars-cov-2; recombinant; rna-seq
383M77XK	journalArticle	2021	Guan, Lidong; Yu, Yuanling; Wu, Xiaohong; Nie, Jianhui; Zhang, Jun; Wang, Zejun; Li, Na; Shi, Rui; Zhao, Hui; Chen, Hongbo; Luo, Chunxia; Hu, Yaling; Wang, Youchun; Huang, Weijin; Xu, Miao; Hou, Jifeng	The first Chinese national standards for SARS-CoV-2 neutralizing antibody	Vaccine		0264-410X	10.1016/j.vaccine.2021.05.047		In order to meet the domestic urgent needs of evaluating the immunogenicity of vaccines and the potency testing of therapeutic antibody products against coronavirus disease 2019 (COVID-19), the first Chinese national standards for SARS-CoV-2 neutralizing antibody were established. The potency and stability of the candidate standards were determined by neutralization assay and accelerated degradat…	2021/6/23	2022/9/20 10:55	2022/9/20 10:55		3724-3730		28	39		Vaccine								English							Place: Oxford Publisher: Elsevier Sci Ltd WOS:000661420000009				covid-19; SARS-CoV-2; Neutralization assay; Neutralizing antibody; Standard
MDXMB33P	journalArticle		Vierstraete, Maaike; Sabbe, Toon	Aortic thrombosis and acute limb ischemia after ChAdOx1 nCov-19 (Oxford-AstraZeneca) vaccination: a case of vaccine-induced thrombocytopenia and thrombosis (VITT)	Acta Chirurgica Belgica		0001-5458	10.1080/00015458.2021.2017600		Introduction Vaccine-induced thrombocytopenia and thrombosis (VITT) is a rare but devastating adverse event associated with the ChAdOx1 nCoV-19 (Oxford-AstraZeneca) adenoviral vaccine against the Severe Acute Respiratory Syndrome CoronaVirus-2 (SARS-CoV-2). Methods A 49-year-old man presented to the emergency department with acute right limb ischemia (Rutherford IIB) nine days after his ChAdOx1 n…		2022/9/20 10:55	2022/9/20 10:55							Acta Chir. Belg.								English							Place: Abingdon Publisher: Taylor & Francis Ltd WOS:000737790400001				ChAdOx1 nCov-19 (Oxford-AstraZeneca); coronavirus disease 2019 (COVID-19); severe acute respiratory syndrome coronavirus-2 (SARS-CoV-2); Vaccine-induced thrombocytopenia and thrombosis (VITT)
82XMDNEK	journalArticle	2021	Haneef, Kabeer; Memon, Abdul Ghaffar; Saleem, Rabia; Batool, Farwa; Sadeeq, Mohd	B cell receptor (BCR) guided mechanotransduction: Critical hypothesis to instruct SARS-CoV-2 specific B cells to trigger proximal signalling and antibody reshaping	Medical Hypotheses		0306-9877	10.1016/j.mehy.2021.110640		Severe acute respiratory syndrome coronavirus 2 (SARS-CoV-2), which causes COVID-19, has spread around the globe with remarkable consequences for the health of millions of people. Despite the approval of mRNA vaccines to prevent the spread of infection, long-term immunity must still be monitored. Targeting and modifying virus receptor binding regions to activate B cell receptors (BCRs) is a promi…	Aug-21	2022/9/20 10:55	2022/9/20 10:55		110640			153		Med. Hypotheses								English							Place: Edinburgh Publisher: Churchill Livingstone WOS:000686220600003				SARS-CoV-2; activation; Antibody production; bcr; BCR dynamics; BCR spatiotemporal dynamics; Mechanotransduction; nanoscale; organization; responses; Vaccine entanglements
GR2QCAT6	journalArticle	2021	Brown, Catherine M.; Vostok, Johanna; Johnson, Hillary; Burns, Meagan; Gharpure, Radhika; Sami, Samira; Sabo, Rebecca T.; Hall, Noemi; Foreman, Anne; Schubert, Petra L.; Gallagher, Glen R.; Fink, Timelia; Madoff, Lawrence C.; Gabriel, Stacey B.; MacInnis, Bronwyn; Park, Daniel J.; Siddle, Katherine J.; Harik, Vaira; Arvidson, Deirdre; Brock-Fisher, Taylor; Dunn, Molly; Kearns, Amanda; Laney, A. S…	Outbreak of SARS-CoV-2 Infections, Including COVID-19 Vaccine Breakthrough Infections, Associated with Large Public Gatherings - Barnstable County, Massachusetts, July 2021	Mmwr-Morbidity and Mortality Weekly Report		0149-2195				2021/8/6	2022/9/20 10:55	2022/9/20 10:55		1059-1062		31	70		MMWR-Morb. Mortal. Wkly. Rep.								English							Place: Atlanta Publisher: Centers Disease Control & Prevention WOS:000682958000002
KZ8G3QGQ	journalArticle	2021	Hause, Anne M.; Gee, Julianne; Baggs, James; Abara, Winston E.; Marquez, Paige; Thompson, Deborah; Su, John R.; Licata, Charles; Rosenblum, Hannah G.; Myers, Tanya R.; Shimabukuro, Tom T.; Shay, David K.	COVID-19 Vaccine Safety in Adolescents Aged 12-17 Years - United States, December 14, 2020-July 16, 2021	Mmwr-Morbidity and Mortality Weekly Report		0149-2195				2021/8/6	2022/9/20 10:55	2022/9/20 10:55		1053-1058		31	70		MMWR-Morb. Mortal. Wkly. Rep.								English							Place: Atlanta Publisher: Centers Disease Control & Prevention WOS:000682958000001
98WHU3EE	journalArticle		Evans, Charlesnika T.; DeYoung, Benjamin J.; Gray, Elizabeth L.; Wallia, Amisha; Ho, Joyce; Carnethon, Mercedes; Zembower, Teresa R.; Hirschhorn, Lisa R.; Wilkins, John T.	Coronavirus disease 2019 (COVID-19) vaccine intentions and uptake in a tertiary-care healthcare system: A longitudinal study	Infection Control and Hospital Epidemiology		0899-823X	10.1017/ice.2021.523		Objectives: Healthcare workers (HCWs) are a high-priority group for coronavirus disease 2019 (COVID-19) vaccination and serve as sources for public information. In this analysis, we assessed vaccine intentions, factors associated with intentions, and change in uptake over time in HCWs. Methods: A prospective cohort study of COVID-19 seroprevalence was conducted with HCWs in a large healthcare sys…		2022/9/20 10:55	2022/9/20 10:55		PII S0899823X21005237					Infect. Control Hosp. Epidemiol.								English							Place: New York Publisher: Cambridge Univ Press WOS:000742208200001				united-states; barriers; influenza vaccination; willingness
4ZKBJHZT	journalArticle	2022	Coccia, Mario	Optimal levels of vaccination to reduce COVID-19 infected individuals and deaths: A global analysis	Environmental Research		0013-9351	10.1016/j.envres.2021.112314		Coronavirus disease 2019 (COVID-19) continues to be a pandemic threat that is generating a constant state of alert in manifold countries. One of the strategies of defense against infectious diseases (e.g., COVID-19) is the vaccinations that decrease the numbers of infected individuals and deaths. In this context, the optimal level of vaccination for COVID-19 is a basic point to control this pande…	Mar-22	2022/9/20 10:55	2022/9/20 10:55		112314			204		Environ. Res.								English							Patent Number: C Place: San Diego Publisher: Academic Press Inc Elsevier Science WOS:000730783800014				advisory-committee; practices interim recommendation; Public health; united-states; sars-cov-2; COVID-19 vaccine; Crisis management; Herd immunity; herd-immunity; Vaccination campaign
B7HV6TKV	journalArticle	2021	Malik, Asmara; Malik, Jahanzeb; Ishaq, Uzma	Acceptance of COVID-19 vaccine in Pakistan among health care workers	Plos One		1932-6203	10.1371/journal.pone.0257237		Objective Acceptance of the COVID-19 vaccine will impart a pivotal role in eradicating the virus. In Pakistan, health care workers (HCWs) are the first group to receive vaccination. This survey aimed at the level of acceptance to the COVID-19 vaccine and predictors of non-acceptance in HCWs. Method This was a cross-sectional study design and data were collected through 3rd December 2020 and Febru…	2021/9/15	2022/9/20 10:55	2022/9/20 10:55		e0257237		9	16		PLoS One								English							Place: San Francisco Publisher: Public Library Science WOS:000707084400028				determinants; hesitancy
6Z2FPHR8	journalArticle	2021	Hussain, Saba; Ali, Farheen; Salahuddin, Nawal; Karim, Musa; Naz, Shakeela; Khawaja, Rizwan A.; Rifaz, Sadaf	Perceptions Regarding COVID-19 Vaccination Among a Representative Pakistani Population Coming to Tertiary Care Cardiac Hospital	Cureus			10.7759/cureus.18654		Background: The deleterious effects caused by coronavirus disease 2019 (COVID-19) infection have been compounded by COVID-19 vaccine hesitancy throughout the world, including Pakistan. We are lacking representative national data regarding the COVID-19 vaccine acceptance. This study aims to determine COVID-19 vaccination acceptance rates and predictors of its acceptance and hesitancy among a repre…	2021/10/11	2022/9/20 10:55	2022/9/20 10:55		e18654		10	13		Cureus								English							Place: Palo Alto Publisher: Cureus Inc WOS:000707204900031				covid-19; acceptance; vaccine; hesitancy; pakistan
RFQQG2HJ	journalArticle	2021	Mitrev, Ludmil; Banerjee, Annesha; Van Helmond, Noud	Correlation of Country Characteristics and Government Response Measures With COVID-19 Mortality During the First Phase of the Global COVID-19 Pandemic: A Worldwide Ecological Study	Cureus			10.7759/cureus.18689		Introduction It is valuable to know if country demographic, educational, healthcare and other socioeconomic factors were correlated with the COVID-19 mortality rate during the initial phase of the coronavirus disease 2019 (COVID-19) worldwide pandemic (January 1st - August 31st, 2020). Similarly, it is worthwhile understanding whether a country's geographic location or the measures instituted by …	2021/10/11	2022/9/20 10:55	2022/9/20 10:55		e18689		10	13		Cureus								English							Place: Palo Alto Publisher: Cureus Inc WOS:000707204900032				covid-19; mortality; pandemic; public health; socioeconomic determinants of healthcare
9E55REX7	journalArticle	2021	Shim, Eunha	Optimal Allocation of the Limited COVID-19 Vaccine Supply in South Korea	Journal of Clinical Medicine			10.3390/jcm10040591		Initial supply of the coronavirus disease (COVID-19) vaccine may be limited, necessitating its effective use. Herein, an age-structured model of COVID-19 spread in South Korea is parameterized to understand the epidemiological characteristics of COVID-19. The model determines optimal vaccine allocation for minimizing infections, deaths, and years of life lost while accounting for population facto…	Feb-21	2022/9/20 10:55	2022/9/20 10:55		591		4	10		J. Clin. Med.								English							Place: Basel Publisher: Mdpi WOS:000624063300001				covid-19; SARS-CoV-2; vaccine; influenza vaccination; contacts; Korea; mathematical model; optimal strategy; strategies; transmission; vaccine allocation strategy
CMLGDTPR	journalArticle	2021	Giusti, Massimo; Maio, Agostino	Acute thyroid swelling with severe hypothyroid myxoedema after COVID-19 vaccination	Clinical Case Reports		2050-0904	10.1002/ccr3.5217		The SARS-CoV-2 virus can trigger thyroid dysfunction. Thyroid dysfunctions after COVID-19 vaccination have been rarely reported. We report the case of overt hypothyroidism in a 61-year-old woman seen after BNT162b2-mRNA vaccination. This case underlines the fact that thyroid function should also be monitored after COVID-19 vaccination, especially in at-risk subjects.	Dec-21	2022/9/20 10:55	2022/9/20 10:55		e05217		12	9		Clin. Case Rep.								English							Place: Hoboken Publisher: Wiley WOS:000734482100106				covid-19; levothyroxine; myxedema; thyroid; vaccination overt hypothyroidism
AQP63GMQ	journalArticle	2021	Geana, Mugur V.; Anderson, Sherri; Ramaswamy, Megha	COVID-19 vaccine hesitancy among women leaving jails: A qualitative study	Public Health Nursing		0737-1209	10.1111/phn.12922		In many correctional facilities across the United States, COVID-19 vaccine refusal rates are as high as 50%. Most women leaving jails have low SES, health literacy, and mistrust of governmental institutions, thus exacerbating existing health disparities and making women leaving jail vulnerable. Data from 25 interviews with recently released women suggest that interventions to promote vaccines to …	Sep-21	2022/9/20 10:55	2022/9/20 10:55		892-896		5	38		Public Health Nurs.								English							Place: Hoboken Publisher: Wiley WOS:000648863000001				covid-19; vaccine; health literacy; literacy; vaccine hesitancy; women leaving jails
GNXQRDAX	journalArticle	2021	Miles, David K.; Heald, Adrian H.; Stedman, Michael	How fast should social restrictions be eased in England as COVID-19 vaccinations are rolled out?	International Journal of Clinical Practice		1368-5031	10.1111/ijcp.14191		Introduction Vaccination against the COVID-19 virus began in December 2020 in the UK and into Spring 2021 has been running at 5% population/week. High levels of social restrictions were implemented for the third time in January 2021 to control the second wave and resulting increases in hospitalisations and deaths. Easing those restrictions must balance multiple challenging priorities, weighing th…	Jul-21	2022/9/20 10:55	2022/9/20 10:55		e14191		7	75		Int. J. Clin. Pract.								English							Place: Hoboken Publisher: Wiley WOS:000646725400001
ZDL3R2LQ	journalArticle	2021	Mahil, Satveer K.; Bechman, Katie; Raharja, Antony; Domingo-Vila, Clara; Baudry, David; Brown, Matthew A.; Cope, Andrew P.; Dasandi, Tejus; Graham, Carl; Lechmere, Thomas; Malim, Michael H.; Meynell, Freya; Pollock, Emily; Seow, Jeffery; Sychowska, Kamila; Barker, Jonathan N.; Norton, Sam; Galloway, James B.; Doores, Katie J.; Tree, Timothy I. M.; Smith, Catherine H.	The effect of methotrexate and targeted immunosuppression on humoral and cellular immune responses to the COVID-19 vaccine BNT162b2: a cohort study	Lancet Rheumatology		2665-9913	10.1016/S2665-9913(21)00212-5		Background Patients on therapeutic immunosuppressants for immune-mediated inflammatory diseases were excluded from COVID-19 vaccine trials. We therefore aimed to evaluate humoral and cellular immune responses to COVID-19 vaccine BNT162b2 (Pfizer-BioNTech) in patients taking methotrexate and commonly used targeted biological therapies, compared with healthy controls. Given the roll-out of extended…	Sep-21	2022/9/20 10:55	2022/9/20 10:55		E627-E637		9	3		Lancet Rheumatol.								English							Place: Amsterdam Publisher: Elsevier WOS:000690385000011				influenza; protection; rheumatoid-arthritis
MK6FMGE8	journalArticle	2021	Xiaojie, Shi; Yu, Li; Lei, Yan; Guang, Yang; Min, Qiang	Neutralizing antibodies targeting SARS-CoV-2 spike protein	Stem Cell Research		1873-5061	10.1016/j.scr.2020.102125		SARS-CoV-2 causing the worldwide pandemic has changed people's life in multiple aspects dramatically since it's first identified in Wuhan, China at the end of 2019. While the numbers of infected patients and death toll keep vigorous increasing, curbing the progression of the pandemic is an urgent goal. Efforts have been made to search for prophylactic and therapeutic approaches including neutrali…	Jan-21	2022/9/20 10:55	2022/9/20 10:55		102125			50		Stem Cell Res.								English							Place: Amsterdam Publisher: Elsevier WOS:000614260000017				covid-19; SARS-CoV-2; Antibody germline; coronavirus; Spike RBD; structural basis; Therapeutic antibody
BK3V7ESB	journalArticle	2021	Jester, Dylan J.; Peterson, Lindsay J.; Dosa, David M.; Hyer, Kathryn	Infection Control Citations in Nursing Homes: Compliance and Geographic Variability	Journal of the American Medical Directors Association		1525-8610	10.1016/j.jamda.2020.11.010		Objectives: To report the initial compliance with new infection control regulations and geographic disparities in nursing homes (NHs) in the United States. Design: Retrospective cohort study from November 27, 2017 to November 27, 2019. Setting and Participants: In total, 14,894 NHs in the continental United States comprising 26,201 inspections and 176,841 deficiencies. Methods: We measured the cu…	Jun-21	2022/9/20 10:55	2022/9/20 10:55		1317-+		6	22		J. Am. Med. Dir. Assoc.								English							Place: New York Publisher: Elsevier Science Inc WOS:000659464600034				influenza vaccination; care; control programs; deficiencies; facilities; geographic disparities; Infection prevention; prevention; quality
EZI6A72D	journalArticle	2021	Silvestris, Nicola; Brunetti, Oronzo; Bernardini, Renato; Cinieri, Saverio	COVID Vaccination in Cancer Patients: What Vaccination Priority Strategies Should There Be?	Frontiers in Oncology		2234-943X	10.3389/fonc.2021.641388			2021/2/4	2022/9/20 10:55	2022/9/20 10:55		641388			11		Front. Oncol.								English							Place: Lausanne Publisher: Frontiers Media Sa WOS:000619002100001				covid-19; SARS-CoV-2; vaccine; cancer patients; chemotherapy
H9I8H8VC	journalArticle	2022	Huang, Yan; Liu, Wenlin	Promoting COVID-19 Vaccination: The Interplay of Message Framing, Psychological Uncertainty, and Public Agency as a Message Source	Science Communication		1075-5470	10.1177/10755470211048192		The study examines how framing, psychological uncertainty, and agency type influence campaign effectiveness in promoting coronavirus disease 2019 (COVID-19) vaccines. A 2 (gain vs. loss frame) x 2 (high vs. low uncertainty) x 2 (national vs. local agency) between-subjects experiment was conducted among Houston residents (N = 382). Findings revealed that a loss frame was more effective among parti…	Feb-22	2022/9/20 10:55	2022/9/20 10:55		3月29日		1	44		Sci. Commun.								English							Place: Thousand Oaks Publisher: Sage Publications Inc WOS:000704030300001				COVID-19 vaccination; framing; gain; impact; information; intentions; loss-framed messages; management; mediating role; metaanalysis; public agency; reactance; relative persuasiveness; uncertainty
BKABN6ZE	journalArticle	2021	Jakhmola, Shweta; Baral, Budhadev; Jha, Hem Chandra	A comparative analysis of COVID-19 outbreak on age groups and both the sexes of population from India and other countries	Journal of Infection in Developing Countries		1972-2680	10.3855/jidc.13698		Introduction: The study of epidemiological outcomes of COVID-19 in the affected countries needs to be conducted to implement an effective strategy. Methodology: Our study included age and sex-based analysis of epidemiological data of infected and deceased patients from various countries. The patient data was graphically depicted with the slope's calculation to describe a gradual or steep spread o…	Mar-21	2022/9/20 10:55	2022/9/20 10:55		333-+		3	15		J. Infect. Dev. Ctries.								English							Place: Tramaniglio Publisher: J Infection Developing Countries WOS:000698685600004				covid-19; SARS-CoV-2; age-group; bcg vaccination; epidemiology; immunization; India
PWYBNRV9	journalArticle	2021	Lippi, Giuseppe; Henry, Brandon Michael; Plebani, Mario	Anti-SARS-CoV-2 Antibodies Testing in Recipients of COVID-19 Vaccination: Why, When, and How?	Diagnostics			10.3390/diagnostics11060941		Although universal vaccination is one of the most important healthcare strategies for limiting SARS-CoV-2 (severe acute respiratory syndrome coronavirus 2) circulation and averting the huge number of hospitalizations and deaths due to coronavirus disease 2019 (COVID-19), significant inter-individual variability of COVID-19 vaccines' efficacies has been described, mostly due to heterogeneous immun…	Jun-21	2022/9/20 10:55	2022/9/20 10:55		941		6	11		Diagnostics								English							Place: Basel Publisher: Mdpi WOS:000665297500001				covid-19; SARS-CoV-2; immunoassays; monitoring; sars-cov-2 antibodies; vaccination
47GIM9YE	journalArticle	2021	Gianfredi, Vincenza; Filia, Antonietta; Rota, Maria Cristina; Croci, Roberto; Bellini, Lorenzo; Odone, Anna; Signorelli, Carlo	Vaccine Procurement: A Conceptual Framework Based on Literature Review	Vaccines			10.3390/vaccines9121434		Ensuring timely access to affordable vaccines has been acknowledged as a global public health priority, as also recently testified by the debate sparked during the COVID-19 pandemic. Effective vaccine procurement strategies are essential to reach this goal. Nevertheless, this is still a neglected research topic. A narrative literature review on vaccine procurement was conducted, by retrieving art…	Dec-21	2022/9/20 10:55	2022/9/20 10:55		1434		12	9		Vaccines								English							Place: Basel Publisher: Mdpi WOS:000737467900001				vaccine; quality; immunization; Europe; future; progress; review; vaccine procurement; world
BWVJPX93	journalArticle	2021	Botwin, Gregory J.; Li, Dalin; Figueiredo, Jane; Cheng, Susan; Braun, Jonathan; McGovern, Dermot P. B.; Melmed, Gil Y.	Adverse Events After SARS-CoV-2 mRNA Vaccination Among Patients With Inflammatory Bowel Disease	American Journal of Gastroenterology		0002-9270	10.14309/ajg.0000000000001342		INTRODUCTION: Patients with immune-mediated inflammatory diseases such as inflammatory bowel disease (IBD) on immunosuppressive and biologic therapies were largely excluded from severe acute respiratory syndrome coronavirus-2 messenger RNA vaccine trials. METHODS: We evaluated adverse events (AE) after messenger RNA vaccination in 246 adults with IBD participating in a longitudinal vaccine regist…	Aug-21	2022/9/20 10:55	2022/9/20 10:55		1746-1751		8	116		Am. J. Gastroenterol.								English							Place: Philadelphia Publisher: Lippincott Williams & Wilkins WOS:000703895200030
LADZA6BF	journalArticle	2021	Chen, Albert Tian; Altschuler, Kevin; Zhan, Shing Hei; Chan, Yujia Alina; Deverman, Benjamin E.	COVID-19 CG enables SARS-CoV-2 mutation and lineage tracking by locations and dates of interest	Elife		2050-084X	10.7554/eLife.63409		COVID-19 CG (covidcg.org) is an open resource for tracking SARS-CoV-2 single-nucleotide variations (SNVs), lineages, and clades using the virus genomes on the GISAID database while filtering by location, date, gene, and mutation of interest. COVID-19 CG provides significant time, labor, and cost-saving utility to projects on SARS-CoV-2 transmission, evolution, diagnostics, therapeutics, vaccines,…	2021/2/23	2022/9/20 10:55	2022/9/20 10:55		e63409			10		eLife								English							Place: Cambridge Publisher: eLIFE SCIENCES PUBL LTD WOS:000621687800001
YB29B2S3	journalArticle	2021	Chen, Musha; Li, Yanjun; Chen, Jiaoshan; Wen, Ziyu; Feng, Fengling; Zou, Huachun; Fu, Chuanxi; Chen, Ling; Shu, Yuelong; Sun, Caijun	An online survey of the attitude and willingness of Chinese adults to receive COVID-19 vaccination	Human Vaccines & Immunotherapeutics		2164-5515	10.1080/21645515.2020.1853449		Background: A safe and effective vaccine against COVID-19 has become a public health priority. However, little is known about the public willingness to accept a future COVID-19 vaccine in China. This study aimed to understand the willingness and determinants for the acceptance of a COVID-19 vaccine among Chinese adults. Methods: A cross-sectional survey using an online questionnaire was conducted…	2021/7/3	2022/9/20 10:55	2022/9/20 10:55		2279-2288		7	17		Human Vaccines Immunother.								English							Place: Philadelphia Publisher: Taylor & Francis Inc WOS:000613376800001				covid-19; SARS-CoV-2; vaccine; willingness; attitude
WRQ3QYPC	journalArticle	2021	Cadegiani, Flavio A.; Zimerman, Ricardo A.; de Souza, Bruno Campello; McCoy, John; Pereira e Costa, Rute Alves; Wambier, Carlos Gustavo; Goren, Andy	The AndroCoV Clinical Scoring for COVID-19 Diagnosis: A Prompt, Feasible, Costless, and Highly Sensitive Diagnostic Tool for COVID-19 Based on a 1757-Patient Cohort	Cureus Journal of Medical Science			10.7759/cureus.12565		Introduction A major barrier for successful therapeutic approaches for COVID-19 is the inability to diagnose COVID-19 during the viral replication stage, when drugs with potential antiviral activity could demonstrate efficacy and preclude progression to more severe stages. Reasons that hamper an earlier diagnosis of COV1D-19 include the unspecific and mild symptoms during the first stage, the del…	2021/1/7	2022/9/20 10:55	2022/9/20 10:55		e12565		1	13		Cureus J Med Sci								English							Place: Palo Alto Publisher: Cureus Inc WOS:000606245900024				covid-19; sars-cov-2; pandemic; ageusia; anosmia; clinical diagnosis of covid-19; covid-19 diagnosis; diagnosis; rtpcr; rtpcr-sars-cov-2
PJWZTFJ3	journalArticle	2021	Ullah, Rooh; Rana, Muhammad Suleman; Qadir, Mehmood; Usman, Muhammad; Ahmed, Niaz	Coronavirus Pandemic: a major public health crisis for the developed and developing world	Journal of Infection in Developing Countries		1972-2680	10.3855/jidc.12995		Pandemic of novel Severe Acute Respiratory Syndrome Coronavirus 2 (SARS-CoV-2) infections in China is now become global public health crisis. At present 87.64% of the world is infected by this deadly illness. The risk from this epidemic depends on the nature of the virus, including how well it transmits from person to person, and the complications resulting from this current illness. The novel co…	Mar-21	2022/9/20 10:55	2022/9/20 10:55		366-369		3	15		J. Infect. Dev. Ctries.								English							Place: Tramaniglio Publisher: J Infection Developing Countries WOS:000698685600009				covid-19; pandemic; transmission; pcr; public health crisis
IPN533S7	journalArticle	2021	Schulte, Bianca; Marx, Benjamin; Korencak, Marek; Emmert, Dorian; Aldabbagh, Souhaib; Eis-Huebinger, Anna Maria; Streeck, Hendrik	Case Report: Infection With SARS-CoV-2 in the Presence of High Levels of Vaccine-Induced Neutralizing Antibody Responses	Frontiers in Medicine			10.3389/fmed.2021.704719		We present a case of SARS-CoV-2 B.1. 525 infection in a healthcare worker despite the presence of highly neutralizing, multivariant-specific antibodies 7 weeks after full vaccination with the mRNA vaccine BNT162b2. We show that the virus replicated to high levels in the upper respiratory tract over the course of several days in the presence of strong antibody responses. The virus was readily prop…	2021/7/23	2022/9/20 10:55	2022/9/20 10:55		704719			8		Front. Med.								English							Place: Lausanne Publisher: Frontiers Media Sa WOS:000681638100001				SARS-CoV-2; b.1.1.7; breakthrough infection; mRNA vaccines; neutralizing antibodies; virus variants
3IXDJWZA	journalArticle	2021	Suo, Luodan; Ma, Rui; Wang, Zhongzhan; Tang, Tian; Wang, Haihong; Liu, Fang; Tang, Jinfeng; Peng, Xinghui; Guo, Xue; Lu, Li; Pang, Xinghuo	Perception of the COVID-19 Epidemic and Acceptance of Vaccination Among Healthcare Workers Prior to Vaccine Licensure - Beijing Municipality, China, May July 2020	China Cdc Weekly			10.46234/ccdcw2021.130		What is already known about this topic? The coronavirus disease 2019 (COVID-19) vaccine development has been progressing, hut acceptance of the new vaccines by healthcare workers (HCWs) was not well known prior to approval of COVID-19 vaccines in China. What is added by this report? This study found that before vaccine approval. Beijing HCWs expressed moderate willingness to stet vaccinated. Fact…	2021/7/2	2022/9/20 10:55	2022/9/20 10:55		569-575		27	3		China CDC Weekly								English							Place: Changping District Publisher: Chinese Center for Disease Control and Prevention WOS:000670040000001
IKS7TUCM	journalArticle	2021	Nag, Kakon; Baray, Juwel Chandra; Khan, Maksudur Rahman; Mahmud, Asif; Islam, Jikrul; Myti, Sanat; Ali, Rostum; Sarker, Enamul Haq; Kumar, Samir; Chowdhury, Mobarak Hossain; Roy, Rony; Islam, Faqrul; Barman, Uttam; Khan, Habiba; Chakraborty, Sourav; Badsha, Alam; Hossain, Manik; Ahammad, Shamim; Chowdhury, Mashfiqur Rahman; Ghosh, Polash; Shimul, Rayhanul Islam; Ahmmed, Ronzu; Bhuiya, Eleus Hussa…	An mRNA-based vaccine candidate against SARS-CoV-2 elicits stable immuno-response with single dose	Vaccine		0264-410X	10.1016/j.vaccine.2021.05.035		D614G genotype of SARS-CoV-2 virus is highly infectious and responsible for almost all infection for 2nd wave. However, there are currently no reports with D614G as vaccine candidate. Here we report the development of an mRNA-LNP vaccine with D614G variant and characterization in animal model. We have used special mRNA-architecture and formulation that provides suitable response of the product. T…	2021/6/23	2022/9/20 10:55	2022/9/20 10:55		3745-3755		28	39		Vaccine								English							Place: Oxford Publisher: Elsevier Sci Ltd WOS:000661420000012				Coronavirus; covid; d614g; era; Immunization; Lipid nanoparticle; lnp; nanoparticles; spike protein; Vaccination
T97GKM6H	journalArticle	2021	Alamri, Osama; Alnagar, Dalia; Abdulrahman, Alanazi Talal; Alharbi, Randa	THE RATE OF SAUDI SOCIETY'S ACCEPTANCE OF THE COVID 19 VACCINATIONS: MULTIVARIATE ANALYSIS	Jp Journal of Biostatistics		0973-5143	10.17654/JB018030337		The World Health Organisation lists vaccination hesitancy as the 10th greatest health threat worldwide. Vaccination hesitancy is a phenomenon ranging from an individual's indifference to vehement opposition to any vaccination, and this study explores the risk profiles of a sample of the Saudi population in early 2021 contemplating their COVID-19 (Coronavirus disease of 2019) vaccination decisions…	Dec-21	2022/9/20 10:55	2022/9/20 10:55		337-356		3	18		JP J Biostat.								English							Place: Allahabad Publisher: Pushpa Publishing House WOS:000750871500003				vaccine; arabia; COVID-19 vaccination acceptance; predictors; Saudi Arabia
4V6SFQAB	journalArticle	2021	Cook, T. M.; Roberts, J.	Impact of vaccination by priority group on UK deaths, hospital admissions and intensive care admissions from COVID-19	Anaesthesia		0003-2409	10.1111/anae.15442		National (and global) vaccination provides an opportunity to control the COVID-19 pandemic, which disease suppression by societal lockdown and individual behavioural changes will not. We modelled how vaccination through the UK's vaccine priority groups impacts deaths, hospital and ICU admissions from COVID-19. We used the UK COVID-19 vaccines delivery plan and publicly available data to estimate …	May-21	2022/9/20 10:55	2022/9/20 10:55		608-616		5	76		Anaesthesia								English							Place: Hoboken Publisher: Wiley WOS:000617028700001				covid-19; vaccine; pandemic; modelling
RNU3VA6C	journalArticle	2021	Narasimhan, Madhusudhanan; Mahimainathan, Lenin; Araj, Ellen; Clark, Andrew E.; Wilkinson, Kathleen; Yekkaluri, Sruthi; Tiro, Jasmin; Lee, Francesca M.; Balani, Jyoti; Sarode, Ravi; Singal, Amit G.; Muthukumar, Alagarraju	Expanding COVID-19 Vaccine Availability: Role for Combined Orthogonal Serology Testing (COST)	Vaccines			10.3390/vaccines9040376		Background: The persisting Coronavirus disease 2019 (COVID-19) pandemic and limited vaccine supply has led to a shift in global health priorities to expand vaccine coverage. Relying on severe acute respiratory syndrome coronavirus 2 (SARS-CoV-2) molecular testing alone cannot reveal the infection proportion, which could play a critical role in vaccination prioritization. We evaluated the utility …	Apr-21	2022/9/20 10:55	2022/9/20 10:55		376		4	9		Vaccines								English							Place: Basel Publisher: Mdpi WOS:000643776500001				covid-19; SARS-CoV-2; vaccine; IgG; IgM; nucleocapsid; orthogonal antibody testing; spike; vaccine prioritization
ESG4C8PC	journalArticle	2021	Monetti, Marcello; Pozzetto, Bruno; Plotton, Catherine; Gocko, Xavier	The Sars-CoV-2 and its variants	Exercer-La Revue Francophone De Medecine Generale		0998-3953			During the month of February 2021, Covid-19 pandemic raises new concerns to caregivers and healthcare users. Most issues relate to Sars-CoV-2 variants. What do we know about the virus? What is a variant? Do these variants have a higher transmission potential? Can they cause more severe infections? Can people with previous Covid-19 infection become reinfected by the news variants? Three vaccines a…	Mar-21	2022/9/20 10:55	2022/9/20 10:55		118-127		171			Exercer								English							Place: Montreuil Sous Bois Publisher: Coll Natl Generalistes Enseignants WOS:000652208200006				covid-19; spike protein; antibodies; Covid-19; mutation; Sars-CoV-2; vaccines
UPZJNCY6	journalArticle	2021	Pouchain, Denis; Le Roux, Gerard; Boussageon, Remy	Analysis of published data on AstraZeneca AZD1222 vaccine to prevent Covid-19	Exercer-La Revue Francophone De Medecine Generale		0998-3953			The AstraZeneca AZD1222 vaccine against Covid-19 is the third to be granted conditional marketing authorization in Europe. This decision by the regulators is based on data from a study published in The Lancet which presented the results of an interim analysis of 4 very heterogeneous randomized trials. This analysis shows that this vaccine reduces the relative risk of developing symptomatic, mostl…	Mar-21	2022/9/20 10:55	2022/9/20 10:55		128-132		171			Exercer								English							Place: Montreuil Sous Bois Publisher: Coll Natl Generalistes Enseignants WOS:000652208200007				Covid-19; vaccines; shared decision making
KFCCLW73	journalArticle	2021	Ljungman, Per	Infectious complications and vaccines	Hematology-American Society of Hematology Education Program		1520-4391	10.1182/hematology.2021000294		Infections are a major cause of morbidity and can result in mortality in long-term survivors after allogeneic hematopoietic cell transplantation. Chronic graft-versus-host disease and delayed immune reconstitution are recognized risk factors. Different strategies must be utilized depending on the individual patient's situation but include prolonged antimicrobial prophylaxis and vaccination. Some …	2021/12/10	2022/9/20 10:55	2022/9/20 10:55		587-591		1			Hematol.-Am. Soc. Hematol. Educ. Program								English							Place: Washington Publisher: Amer Soc Hematology WOS:000731207900075				european conference; guidelines; measles; recipients; stem-cell transplantation; zoster vaccine
ZRVV2W59	journalArticle	2021	Deng, Jieping; Pan, Junping; Qiu, Minghui; Mao, Lipeng; Wang, Zhigang; Zhu, Guodong; Gao, Lijuan; Su, Jun; Hu, Yutian; Luo, Oscar Junhong; Chen, Guobing; Wang, Pengcheng	Identification of HLA-A2 restricted CD8(+) T cell epitopes in SARS-CoV-2 structural proteins	Journal of Leukocyte Biology		0741-5400	10.1002/JLB.4MA0621-020R		The outbreak of coronavirus disease 2019 (COVID-19) has now become a pandemic, and the etiologic agent is the severe acute respiratory syndrome-coronavirus 2 (SARS-CoV-2). T cell mediated immune responses play an important role in virus controlling; however, the understanding of the viral protein immunogenicity and the mechanisms of the induced responses are still limited. So, identification of s…	Dec-21	2022/9/20 10:55	2022/9/20 10:55		1171-1180		6	110		J. Leukoc. Biol.								English							Place: Hoboken Publisher: Wiley WOS:000670297300001				SARS-CoV-2; responses; coronavirus; CD8+T cells; epitope; mechanisms; receptor; structural protein
Z34LEWVE	journalArticle	2021	Gerber, Gloria F.; Chaturvedi, Shruti	How to recognize and manage COVID-19-associated coagulopathy	Hematology-American Society of Hematology Education Program		1520-4391	10.1182/hematology.2021000297		COVID-19 is frequently associated with abnormalities on coagulation testing and a coagulopathy driven by inflammation, intravascular coagulation activation, and microvascular thrombosis. Elevated D-dimer is the most common finding and is a predictor of adverse outcomes including thrombosis, critical illness, and death. Although COVID-19-associated coagulopathy has some similarities to disseminate…	2021/12/10	2022/9/20 10:55	2022/9/20 10:55		614-620		1			Hematol.-Am. Soc. Hematol. Educ. Program								English							Place: Washington Publisher: Amer Soc Hematology WOS:000731207900079				covid-19; thrombocytopenia
Z97KNF25	journalArticle	2021	Kim, Namhee; Minn, Dohsik; Park, Seungman; Roh, Eun Youn; Yoon, Jong Hyun; Park, Hyunwoong; Shin, Sue	Positivity of SARS-CoV-2 Antibodies among Korean Healthy Healthcare Workers 1 and 2 Weeks after Second Dose of Pfizer-BioNTech Vaccination	Journal of Korean Medical Science		1011-8934	10.3346/jkms.2021.36.e158		The antibody titer of the severe acute respiratory syndrome coronavirus 2 (SARS-CoV-2) was observed in 289 healthy healthcare workers who had completed the second dose of the Pfizer-BioNTech coronavirus disease 2019 (COVID-19) vaccine. Antibody tests were performed using both the automated electrochemiluminescence immunoassay (ECLIA) and the chromatographic lateral flow immunoassay (LFIA). All su…	2021/5/31	2022/9/20 10:55	2022/9/20 10:55		e158		21	36		J. Korean Med. Sci.								English							Place: Seoul Publisher: Korean Acad Medical Sciences WOS:000657483000008				covid-19; SARS-CoV-2; Antibody Formation; elisa; Immunoassay; Korean; mRNA Vaccine
QWIKUTG5	journalArticle	2021	Ryu, Dong-Kyun; Song, Rina; Kim, Minsoo; Kim, Young-Il; Kim, Cheolmin; Kim, Jong-In; Kwon, Ki-Sung; Tijsma, Aloys SL; Nuijten, Patricia M.; van Baalen, Carel A.; Hermanus, Tandile; Kgagudi, Prudence; Moyo-Gwete, Thandeka; Moore, Penny L.; Choi, Young Ki; Lee, Soo-Young	Therapeutic effect of CT-P59 against SARS-CoV-2 South African variant	Biochemical and Biophysical Research Communications		0006-291X	10.1016/j.bbrc.2021.06.016		The global circulation of newly emerging variants of SARS-CoV-2 is a new threat to public health due to their increased transmissibility and immune evasion. Moreover, currently available vaccines and therapeutic antibodies were shown to be less effective against new variants, in particular, the South African (SA) variant, termed 501Y.V2 or B.1.351. To assess the efficacy of the CT-P59 monoclonal …	2021/8/20	2022/9/20 10:55	2022/9/20 10:55		135-140			566		Biochem. Biophys. Res. Commun.								English							Place: San Diego Publisher: Academic Press Inc Elsevier Science WOS:000660487500007				1; 351; b; ct-p59; microneutralization assay; Regdanvimab; SARS-CoV-2 virus; Therapeutic antibody; Variant
E3CJZC5D	journalArticle	2021	Seong, Hye; Hong, Jin-Wook; Hyun, Hak-Jun; Yoon, Jin-Gu; Noh, Ji-Yun; Cheong, Hee-Jin; Kim, Woo-Joo; Jung, Jae-Hun; Song, Joon-Young	Correlation between the Level of Social Distancing and Activity of Influenza Epidemic or COVID-19 Pandemic: A Subway Use-Based Assessment	Journal of Clinical Medicine			10.3390/jcm10153369		Social distancing is an effective measure to mitigate the spread of novel viral infections in the absence of antiviral agents and insufficient vaccine supplies. Subway utilization density may reflect social activity and the degree of social distancing in the general population.; This study aimed to evaluate the correlations between subway use density and the activity of the influenza epidemic or …	Aug-21	2022/9/20 10:55	2022/9/20 10:55		3369		15	10		J. Clin. Med.								English							Place: Basel Publisher: Mdpi WOS:000682079700001				covid-19; public health; seroprevalence; severe acute respiratory syndrome coronavirus 2; social distancing; subway
EGJACJVW	journalArticle	2021	Chiarucci, Martina; Paolasini, Sara; Isidori, Alessandro; Guiducci, Barbara; Loscocco, Federica; Capalbo, Maria; Visani, Giuseppe	Immunological Response Against SARS-COV-2 After BNT162b2 Vaccine Administration Is Impaired in Allogeneic but Not in Autologous Stem Cell Transplant Recipients	Frontiers in Oncology		2234-943X	10.3389/fonc.2021.737300		The efficacy of Covid-19 vaccine in hematopoietic stem cell transplantation (HSCT) recipients is still unknown. We planned a prospective study to evaluate the immune response after the administration of Covid-19 vaccine in HSCT recipients. Fifty patients previously submitted to HSCT (38 autologous and 12 allogeneic) received the mRNA-based SARS-CoV-2 vaccine BNT162b2 (Pfizer-BioNTech). Serum samp…	2021/9/6	2022/9/20 10:55	2022/9/20 10:55		737300			11		Front. Oncol.								English							Place: Lausanne Publisher: Frontiers Media Sa WOS:000697314000001				vaccine; allogeneic; autologous; immune response; sars-cov2; transplant
2CJKDRTK	journalArticle	2021	Bhochhibhoya, Amir; Branscum, Paul; Thapaliya, Rashmi; Ghimire, Pragya Sharma; Wharton, Holisa	Applying the Health Belief Model for Investigating the Impact of Political Affiliation on COVID-19 Vaccine Uptake	American Journal of Health Education		1932-5037	10.1080/19325037.2021.1955231		Background Vaccination is likely the most effective approach to protect people from COVID-19. However, partisan differences have persisted for COVID-19 vaccine uptake. Purpose The purpose of this study is to understand different health beliefs related to COVID-19 vaccine uptake based on Health Belief Model (HBM) constructs among individuals with different political affiliations. Methods The study…	2021/9/3	2022/9/20 10:55	2022/9/20 10:55		241-250		5	52		Am. J. Health Educ.								English							Place: Abingdon Publisher: Routledge Journals, Taylor & Francis Ltd WOS:000683210300001				amazons mechanical turk; influenza vaccine
PEK8WYBH	journalArticle	2021	Beh, C. C.; Zulkufli, N. S.; Loh, L. M.; Cheng, K. W.; Choo, L. M.; Cheah, M. W.; Siow, L. K.; Yon, R.	SARS-CoV-2 seroprevalence and antibody trends in vaccinated, multi-ethnic healthcare employees	Tropical Biomedicine		0127-5720	10.47665/tb.38.4.098		Understanding of antibody kinetics against SARS-CoV-2 and its vaccines is rapidly evolving. This study aims to (1) determine post-vaccination seroprevalence; (2) compare antibody levels between vaccine types and various clinical/demographic determinants; and (3) determine post-vaccination antibody concentrations against time. This is a retrospective cross-sectional study involving 148 healthcare …	Dec-21	2022/9/20 10:55	2022/9/20 10:55		552-560		4	38		Trop. Biomed.								English							Place: Kuala Lumpur Publisher: Malaysian Soc Parasitology Tropical Medicine WOS:000784181400001				covid-19; SARS-CoV-2; vaccine; antibodies; seroprevalence
EECM6J3J	journalArticle	2021	Dubey, Ashutosh Kumar; Narang, Sushil; Kumar, Abhishek; Sasubilli, Satya Murthy; Garcia-Diaz, Vicente	Performance Estimation of Machine Learning Algorithms in the Factor Analysis of COVID-19 Dataset	Cmc-Computers Materials & Continua		1546-2218	10.32604/cmc.2020.012151		Novel Coronavirus Disease (COVID-19) is a communicable disease that originated during December 2019, when China officially informed the World Health Organization (WHO) regarding the constellation of cases of the disease in the city of Wuhan. Subsequently, the disease started spreading to the rest of the world. Until this point in time, no specific vaccine or medicine is available for the preventi…	2021	2022/9/20 10:55	2022/9/20 10:55		1921-1936		2	66		CMC-Comput. Mat. Contin.								English							Place: Henderson Publisher: Tech Science Press WOS:000594856200004				covid-19; dt; knn; linear and logistic regression; logistic-regression; svm; SVM with grid search
B9EHQGZ5	journalArticle	2021	Hughes, Katarina; Gogineni, Vinaya; Lewis, Chandani; Deshpande, Abhishek	Considerations for fair prioritization of COVID-19 vaccine and its mandate among healthcare personnel	Current Medical Research and Opinion		0300-7995	10.1080/03007995.2021.1908245		With current COVID-19 vaccine demand outweighing supply and the emergency authorization/rollout of three novel vaccines in the United States, discussions continue regarding fair prioritization among various groups for this scarce resource. The US federal government's recommended vaccination schedule, meant to assist states with vaccine allocation, demonstrates fair ethical considerations; however…	2021/6/3	2022/9/20 10:55	2022/9/20 10:55		907-909		6	37		Curr. Med. Res. Opin.								English							Place: Abingdon Publisher: Taylor & Francis Ltd WOS:000638585100001				COVID-19 vaccine; fair prioritization; healthcare personnel; vaccine mandate
NZNQW8X6	journalArticle	2021	Lee, Yun Woo; Lim, So Yun; Lee, Ji-Hyang; Lim, Joon Seo; Kim, Miseo; Kwon, Seonhee; Joo, Jiyeon; Kwak, Sun Hee; Kim, Eun Ok; Jung, Jiwon; Kwon, Hyouk-Soo; Kim, Tae-Bum; Kim, Sung-Han; Bae, Seongman	Adverse Reactions of the Second Dose of the BNT162b2 mRNA COVID-19 Vaccine in Healthcare Workers in Korea	Journal of Korean Medical Science		1011-8934	10.3346/jkms.2021.36.e153		We conducted a prospective, mobile-based survey on the self-reported adverse reactions in healthcare workers (HCWs) who received both doses of the BNT162b2 mRNA vaccine. Of the 342 HCWs who completed the two-dose vaccination, 265 (77.5%) responded to the survey at least once. Overall, the rates of adverse reactions were higher after the second dose compared with the first dose (89.1% vs. 80.1%, P…	2021/5/31	2022/9/20 10:55	2022/9/20 10:55		e153		21	36		J. Korean Med. Sci.								English							Place: Seoul Publisher: Korean Acad Medical Sciences WOS:000657483000006				covid-19; Vaccination; Adverse Reaction; BNT162b2
CBRIB784	journalArticle		Robilotti, Elizabeth; Whiting, Karissa; Lucca, Anabella; Poon, Chester; Guest, Rebecca; McMillen, Tracy; Jani, Krupa; Solovyov, Alexander; Kelson, Suzanne; Browne, Kevin; Freeswick, Scott; Hohl, Tobias M.; Korenstein, Deborah; Ruchnewitz, Denis; Lassig, Michael; Luksza, Marta; Greenbaum, Benjamin; Seshan, Venkatraman E.; Babady, N. Esther; Kamboj, Mini	Clinical and Genomic Characterization of Severe Acute Respiratory Syndrome Coronavirus 2 (SARS CoV-2) Infections in mRNA Vaccinated Health Care Personnel in New York City	Clinical Infectious Diseases		1058-4838	10.1093/cid/ciab886		Background Vaccine-induced clinical protection against severe acute respiratory syndrome coronavirus 2 (SARS CoV-2) variants is an evolving target. There are limited genomic level data on SARS CoV-2 breakthrough infections and vaccine effectiveness (VE) since the global spread of the B.1.617.2 (Delta) variant. Methods In a retrospective study from 1 November 2020 to 31 August 2021, divided as pre…		2022/9/20 10:55	2022/9/20 10:55							Clin. Infect. Dis.								English							Place: Cary Publisher: Oxford Univ Press Inc WOS:000789285800001				SARS-CoV-2; 8 us locations; breakthrough infections; covid-19 vaccines; frontline workers; preventing sars-cov-2 infection; vaccine effectiveness; variant
TE6TAL5X	journalArticle	2022	Zychlinsky Scharff, Anna; Paulsen, Mira; Schaefer, Paula; Tanisik, Fatma; Sugianto, Rizky Indrameikha; Stanislawski, Nils; Blume, Holger; Schmidt, Bernhard M. W.; Heiden, Stefanie; Stiesch, Meike; Melk, Anette	Students' age and parental level of education influence COVID-19 vaccination hesitancy	European Journal of Pediatrics		0340-6199	10.1007/s00431-021-04343-1		Widespread vaccination in pursuit of herd immunity has been recognized as the most promising approach to ending the global pandemic of coronavirus disease 19 (COVID-19). The vaccination of children and adolescents has been extensively debated and the first COVID-19 vaccine is now approved in European countries for children aged > 12 years of age. Our study investigates vaccination hesitancy in a …	Apr-22	2022/9/20 10:55	2022/9/20 10:55		1757-1762		4	181		Eur. J. Pediatr.								English							Place: New York Publisher: Springer WOS:000732505900001				covid-19; Vaccination; Adolescents; Children; Vaccine hesitancy
UISHP5EE	journalArticle	2021	Jalloh, Mohamed F.; Nur, Aasli A.; Nur, Sophia A.; Winters, Maike; Bedson, Jamie; Pedi, Danielle; Prybylski, Dimitri; Namageyo-Funa, Apophia; Hageman, Kathy M.; Baker, Brian J.; Jalloh, Mohammad B.; Eng, Eugenia; Nordenstedt, Helena; Hakim, Avi J.	Behaviour adoption approaches during public health emergencies: implications for the COVID-19 pandemic and beyond	Bmj Global Health		2059-7908	10.1136/bmjgh-2020-004450		Human behaviour will continue to play an important role as the world grapples with public health threats. In this paper, we draw from the emerging evidence on behaviour adoption during diverse public health emergencies to develop a framework that contextualises behaviour adoption vis-a-vis a combination of top-down, intermediary and bottom-up approaches. Using the COVID-19 pandemic as a case stud…	2021	2022/9/20 10:55	2022/9/20 10:55		e004450		1	6		BMJ Glob. Health								English							Place: London Publisher: Bmj Publishing Group WOS:000616721900008				covid-19; responses; public health; contacts; transmission; impact; epidemiology; community; control strategies; ebola-virus; epidemic; outbreak; prevention strategies; sierra-leone; social mobilization
RALKLP69	journalArticle	2022	Park, Sungwook; Kim, Hojun; Woo, Kyungmin; Kim, Jeong-Min; Jo, Hye-Jun; Jeong, Youngdo; Lee, Kwan Hyi	SARS-CoV-2 Variant Screening Using a Virus-Receptor-Based Electrical Biosensor	Nano Letters		1530-6984	10.1021/acs.nanolett.1c03108		SARS-CoV-2 variants are of particular interest because they can potentially increase the transmissibility and virulence of COVID-19 or reduce the effectiveness of available vaccines. However, screening SARS-CoV-2 variants is a challenge because biosensors target viral components that can mutate. One promising strategy is to screen variants via angiotensin-converting enzyme 2 (ACE2), a virus recep…	2022/1/12	2022/9/20 10:55	2022/9/20 10:55		50-57		1	22		Nano Lett.								English							Place: Washington Publisher: Amer Chemical Soc WOS:000737851900001				covid-19; SARS-CoV-2; coronavirus; diagnosis; spike; ace2; biosensor; sensor; variant screening; virus receptor
AYLL88NR	journalArticle	2021	Scarpati, Giuliana; Piazza, Ornella; Pagliano, Pasquale; Rizzo, Francesca	COVID-19: a confirmed case of reinfection in a nurse	Bmj Case Reports			10.1136/bcr-2021-244507		We describe the case of a 63-year-old man who is reported to have the first confirmed case of COVID-19 reinfection in Campania Region, Italy. We found that the two episodes were caused by virus strains with clearly different genome sequences. The patient, a retired nurse, had a very low level of antibodies IgG directed against the spike protein 14 days after his first Pfizer/BioNTek vaccine shot.	Jul-21	2022/9/20 10:55	2022/9/20 10:55		e244507		7	14		BMJ Case Rep.								English							Place: London Publisher: Bmj Publishing Group WOS:000674647000006				covid-19; adult intensive care; immunological products and vaccines; pneumonia (infectious disease)
VQKFAMCF	journalArticle		Klein, Matthew N.; Wang, Elizabeth Wenqian; Zimand, Paul; Beauchamp, Heather; Donis, Caitlin; Ward, Matthew D.; Martinez-Hernandez, Aidaelis; Tabatabai, Ali; Baddley, John W.; Bloch, Evan M.; Mullins, Kristin E.; Fontaine, Magali J.	Kinetics of SARS-CoV-2 antibody responses pre-COVID-19 and post-COVID-19 convalescent plasma transfusion in patients with severe respiratory failure: an observational case-control study	Journal of Clinical Pathology		0021-9746	10.1136/jclinpath-2020-207356		Aims While the SARS-CoV-2 pandemic may be contained through vaccination, transfusion of convalescent plasma (CCP) from individuals who recovered from COVID-19 (CCP) is considered an alternative treatment. We investigate if CCP transfusion in patients with severe respiratory failure increases plasma titres of SARS-CoV-2 antibodies and improves clinical outcomes. Methods Patients with COVID-19 (n=3…		2022/9/20 10:55	2022/9/20 10:55							J. Clin. Pathol.								English							Place: London Publisher: Bmj Publishing Group WOS:000727500400001				covid-19; antibodies; blood transfusion
KZ2RT3TA	journalArticle	2021	Khalis, Mohamed; Boucham, Mouna; Luo, Amy; Marfak, Abdelghafour; Saad, Soukaina; Mariama Aboubacar, Camara; Ait El Haj, Soukaina; Jallal, Manar; Aazi, Fatima-Zahra; Charaka, Hafida; Nejjari, Chakib	COVID-19 Vaccination Acceptance among Health Science Students in Morocco: A Cross-Sectional Study	Vaccines			10.3390/vaccines9121451		While students in the health sciences occupy pivotal roles in the Moroccan COVID-19 response and vaccination campaigns, factors associated with COVID-19 vaccine acceptability among students have not been reported. This study aimed to determine the willingness and identify predictive attitudes and beliefs of COVID-19 vaccine acceptance among health science students in Morocco. A cross-sectional, s…	Dec-21	2022/9/20 10:55	2022/9/20 10:55		1451		12	9		Vaccines								English							Place: Basel Publisher: Mdpi WOS:000737861600001				COVID-19 vaccine acceptance; decision making; Middle East and North Africa; Morocco; public health; risk perception
3HD844BU	journalArticle	2021	Barnert, Elizabeth; Kwan, Ada; Williams, Brie	Ten Urgent Priorities Based on Lessons Learned From More Than a Half Million Known COVID-19 Cases in US Prisons	American Journal of Public Health		0090-0036	10.2105/AJPH.2021.306221		COVID-19 is ravaging US prisons. Prison residents and staff must be prioritized for vaccination, but a rapidly mutating virus and high rates of continued spread require an urgent, coordinated public health response. Based on knowledge accumulated from the pandemic thus far, we have identified 10 pressing public health priorities for responding to COVID-19 in prisons: (1) accelerate population red…	Jun-21	2022/9/20 10:55	2022/9/20 10:55		1099-1105		6	111		Am. J. Public Health								English							Place: Washington Publisher: Amer Public Health Assoc Inc WOS:000647616800033
87TK9GJH	journalArticle	2021	Choi, Angela; Koch, Matthew; Wu, Kai; Dixon, Groves; Oestreicher, Judy; Legault, Holly; Stewart-Jones, Guillaume B. E.; Colpitts, Tonya; Pajon, Rolando; Bennett, Hamilton; Carfi, Andrea; Edwards, Darin K.	Serum Neutralizing Activity of mRNA-1273 against SARS-CoV-2 Variants	Journal of Virology		0022-538X	10.1128/JVI.01313-21		The emergence of severe acute respiratory syndrome coronavirus 2 (SARSCoV-2) variants has led to growing concerns over increased transmissibility and the ability of some variants to partially escape immunity. Sera from participants immunized on a prime-boost schedule with the mRNA-1273 COVID-19 vaccine were tested for neutralizing activity against several SARS-CoV-2 variants, including variants o…	Dec-21	2022/9/20 10:55	2022/9/20 10:55		e01313-21		23	95		J. Virol.								English							Place: Washington Publisher: Amer Soc Microbiology WOS:000718332100008				covid-19; mRNA-1273; neutralization; SARS-CoV-2 variants of concern
MREIR8CZ	journalArticle	2022	Tam, Cheuk Chi; Qiao, Shan; Li, Xiaoming	Factors associated with decision making on COVID-19 vaccine acceptance among college students in South Carolina	Psychology Health & Medicine		1354-8506	10.1080/13548506.2021.1983185		COVID-19 vaccination could be a promising approach in controlling the pandemic, but its success relies on the vaccine acceptance among various populations including young adults who are vulnerable to COVID-19 due to active lifestyle and perceived invulnerability. Vaccine acceptance decisions can be influenced by multiple factors and people may weigh these factors differently in decision making. T…	2022/1/2	2022/9/20 10:55	2022/9/20 10:55		150-161		1	27		Psychol. Health Med.								English							Place: Abingdon Publisher: Routledge Journals, Taylor & Francis Ltd WOS:000700376200001				covid-19; hesitancy; college students; vaccination decision making; vaccine acceptance
U2PMVNY8	journalArticle	2021	Nilsson-Payant, Benjamin E.; Uhl, Skyler; Grimont, Adrien; Doane, Ashley S.; Cohen, Phillip; Patel, Roosheel S.; Higgins, Christina A.; Acklin, Joshua A.; Bram, Yaron; Chandar, Vasuretha; Blanco-Melo, Daniel; Panis, Maryline; Lim, Jean K.; Elemento, Olivier; Schwartz, Robert E.; Rosenberg, Brad R.; Chandwani, Rohit; TenOever, Benjamin R.	The NF-kappa B Transcriptional Footprint Is Essential for SARS-CoV-2 Replication	Journal of Virology		0022-538X	10.1128/JVI.01257-21		SARS-CoV-2, the etiological agent of COVID-19, is characterized by a delay in type I interferon (IFN-I)-mediated antiviral defenses alongside robust cytokine production. Here, we investigate the underlying molecular basis for this imbalance and implicate virus-mediated activation of NF-kappa B in the absence of other canonical IFN-I-related transcription factors. Epigenetic and single-cell transc…	Dec-21	2022/9/20 10:55	2022/9/20 10:55		e01257		23	95		J. Virol.								English							Place: Washington Publisher: Amer Soc Microbiology WOS:000718332100005				SARS-CoV-2; activation; chromatin; immunity; induction; inflammation; influenza-virus propagation; inhibition; innate; NF-kappa B; protease cleaves nemo; proteins
ITANXKYI	journalArticle	2021	Hammer, Charlotte C.; Cristea, Veronica; Dub, Timothee; Sivela, Jonas	High but slightly declining COVID-19 vaccine acceptance and reasons for vaccine acceptance, Finland April to December 2020	Epidemiology and Infection		0950-2688	10.1017/S0950268821001114		We investigated likelihood to vaccinate and reasons for and against accepting a coronavirus disease 2019 (COVID-19) vaccine among adult residents of Finland. Vaccine acceptance declined from 70% in April to 64% in December 2020. Complacency and worry about side effects were main reasons against vaccination while concern about severe disease was a strong motive for vaccination. Convenience of vacc…	2021/5/11	2022/9/20 10:55	2022/9/20 10:55		e123			149		Epidemiol. Infect.								English							Place: New York Publisher: Cambridge Univ Press WOS:000651076600001				covid-19; vaccine hesitancy; vaccine acceptance; KAP study
DCAW2N9Z	journalArticle	2021	Chin, Justin; Zhou, YaQun; Chen, Chijen L.; Lomiguen, Christine M.; McClelland, Suzanne; Lee-Wong, Mary	Influenza Vaccination Quality Improvement as a Model for COVID-19 Prophylaxis	Cureus			10.7759/cureus.12549		Introduction: Many comparisons have been made on the effect and impact of COVID-19 on influenza pandemics of history. Therefore, it is reasonable to infer that the strategies utilized by healthcare providers to improve influenza vaccination rates can similarly be applied to the administration of a COVID-19 vaccine. The purpose of this study was to determine the rationale of low influenza vaccinat…	2021/1/7	2022/9/20 10:55	2022/9/20 10:55		e12549		1	13		Cureus								English							Place: Palo Alto Publisher: Cureus Inc WOS:000606245900008				covid-19; vaccine; hesitancy; strategies; vaccine hesitancy; influenza; impact; immunization; influenza vaccine; coronavirus disease; covid-19 vaccine; flu; quality improvement; subcutaneous immunotherapy
7Z723QRH	journalArticle	2021	Huang, Y. Hanna; Huang, Jong T.	Use of chlorhexidine to eradicate oropharyngeal SARS-CoV-2 in COVID-19 patients	Journal of Medical Virology		0146-6615	10.1002/jmv.26954		As public distribution of vaccines against severe acute respiratory syndrome coronavirus 2 (SARS-CoV-2) is underway, prevention of coronavirus disease 2019 (COVID-19) relies on minimizing spread. In this study, chlorhexidine gluconate was investigated as a topical antimicrobial agent against SARS-CoV-2. This was a randomized, prospective cohort study using chlorhexidine as an oral rinse and poste…	Jul-21	2022/9/20 10:55	2022/9/20 10:55		4370-4373		7	93		J. Med. Virol.								English							Place: Hoboken Publisher: Wiley WOS:000635695200001				covid-19; SARS-CoV-2; coronavirus; epidemiology; antiviral agents; disinfectants; dissemination; shedding
VH2QLTVF	journalArticle	2021	Zhao, Yi-Miao; Liu, Lin; Sun, Jie; Yan, Wei; Yuan, Kai; Zheng, Yong-Bo; Lu, Zheng-An; Liu, Lin; Ni, Shu-Yu; Su, Si-Zhen; Zhu, Xi-Mei; Zeng, Na; Gong, Yi-Miao; Wu, Ping; Ran, Mao-Sheng; Leng, Yue; Shi, Jie; Shi, Le; Lu, Lin; Bao, Yan-Ping	Public Willingness and Determinants of COVID-19 Vaccination at the Initial Stage of Mass Vaccination in China	Vaccines			10.3390/vaccines9101172		The present study assessed the willingness of the general population to receive COVID-19 vaccines and identified factors that influence vaccine hesitancy and resistance. A national online survey was conducted from 29 January 2021 to 26 April 2021 in China. Multinomial logistic regression analyses were conducted to identify factors that influence vaccine hesitancy and resistance. Of the 34,041 par…	Oct-21	2022/9/20 10:55	2022/9/20 10:55		1172		10	9		Vaccines								English							Place: Basel Publisher: Mdpi WOS:000714550100001				COVID-19 vaccine; determinants; hesitancy; vaccine hesitancy; vaccines; vaccine resistance
9T3BU9YU	journalArticle	2022	Chang, Ching-Yi; Hwang, Gwo-Jen; Gau, Meei-Ling	Promoting students' learning achievement and self-efficacy: A mobile chatbot approach for nursing training	British Journal of Educational Technology		0007-1013	10.1111/bjet.13158		The aims of nursing training include not only mastering skills but also fostering the competence to make decisions for problem solving. In prenatal education, cultivating nurses' knowledge and competence of vaccine administration is a crucial issue for protecting pregnant women and newborns from infection. Therefore, obstetric vaccination knowledge has become a basic and essential training progra…	Jan-22	2022/9/20 10:55	2022/9/20 10:55		171-188		1	53		Br. J. Educ. Technol.								English							Place: Hoboken Publisher: Wiley WOS:000687026400001				impact; artificial-intelligence; chatbot; COVID-19 pandemic; design; education; machine; mobile learning; nursing education; professional training; support; vaccine administration
QCE67AVF	journalArticle	2021	Walach, Harald; Klement, Rainer J.; Aukema, Wouter	RETRACTED: The Safety of COVID-19 Vaccinations-We Should Rethink the Policy (Publication with Expression of Concern. See vol. 9, 2021) (Retracted article. See vol. 9, 2021)	Vaccines			10.3390/vaccines9070693		Background: COVID-19 vaccines have had expedited reviews without sufficient safety data. We wanted to compare risks and benefits. Method: We calculated the number needed to vaccinate (NNTV) from a large Israeli field study to prevent one death. We accessed the Adverse Drug Reactions (ADR) database of the European Medicines Agency and of the Dutch National Register (lareb.nl) to extract the number…	Jul-21	2022/9/20 10:55	2022/9/20 10:55		693		7	9		Vaccines								English							Place: Basel Publisher: Mdpi WOS:000677145400001				covid-19; vaccination; adverse drug reaction; ema; fatal side effects; mRNA-vaccine; number needed to vaccinate; safety; SARS-CoV2; side effects
4NZJNCNR	journalArticle	2021	Abou Leila, Rabih; Salamah, Mustafa; El-Nigoumi, Sarah	Reducing COVID-19 Vaccine Hesitancy by Implementing Organizational Intervention in a Primary Care Setting in Bahrain	Cureus Journal of Medical Science			10.7759/cureus.19282		Background: Refusal to receive the COVID-19 vaccine or hesitancy is a global threat. Hence, reducing vaccine hesitancy is the next challenge for policymakers and the healthcare system. However, people trust healthcare professionals more than any other source of information. Accordingly, planning for an effective process and competent healthcare professional to elicit and address the patient's con…	2021/11/5	2022/9/20 10:55	2022/9/20 10:55		e19282		11	13		Cureus J Med Sci								English							Place: Palo Alto Publisher: Cureus Inc WOS:000717969800027				vaccine hesitancy; quality; covid-19 vaccine; herd immunity; patient counseling; patient education
VMGKR3XU	journalArticle	2021	Bayarri-Olmos, Rafael; Jarlhelt, Ida; Johnsen, Laust Bruun; Hansen, Cecilie Bo; Helgstrand, Charlotte; Bjelke, Jais Rose; Matthiesen, Finn; Nielsen, Susanne Dam; Iversen, Kasper Karmark; Ostrowski, Sisse Rye; Bundgaard, Henning; Frikke-Schmidt, Ruth; Garred, Peter; Skjoedt, Mikkel-Ole	Functional Effects of Receptor-Binding Domain Mutations of SARS-CoV-2 B.1.351 and P.1 Variants	Frontiers in Immunology		1664-3224	10.3389/fimmu.2021.757197		The recent identification and rise to dominance of the P.1 and B.1.351 SARS-CoV-2 variants have brought international concern because they may confer fitness advantages. The same three positions in the receptor-binding domain (RBD) are affected in both variants, but where the 417 substitution differs, the E484K/N501Y have co-evolved by convergent evolution. Here we characterize the functional and…	2021/10/7	2022/9/20 10:55	2022/9/20 10:55		757197			12		Front. Immunol.								English							Place: Lausanne Publisher: Frontiers Media Sa WOS:000710781000001				SARS-CoV-2; 1; 351; b; ace2; ace-2; e484k; n501y; p; rbd; variant of concern
NFVV3IPI	journalArticle	2021	Hacisuleyman, Ezgi; Hale, Caryn; Saito, Yuhki; Blachere, Nathalie E.; Bergh, Marissa; Conlon, Erin G.; Schaefer-Babajew, Dennis J.; DaSilva, Justin; Muecksch, Frauke; Gaebler, Christian; Lifton, Richard; Nussenzweig, Michel C.; Hatziioannou, Theodora; Bieniasz, Paul D.; Darnell, Robert B.	Vaccine Breakthrough Infections with SARS-CoV-2 Variants	New England Journal of Medicine		0028-4793	10.1056/NEJMoa2105000		Emerging variants of severe acute respiratory syndrome coronavirus 2 (SARS-CoV-2) are of clinical concern. In a cohort of 417 persons who had received the second dose of BNT162b2 (Pfizer-BioNTech) or mRNA-1273 (Moderna) vaccine at least 2 weeks previously, we identified 2 women with vaccine breakthrough infection. Despite evidence of vaccine efficacy in both women, symptoms of coronavirus disease…	2021/6/10	2022/9/20 10:55	2022/9/20 10:55		2212-2218		23	384		N. Engl. J. Med.								English							Place: Waltham Publisher: Massachusetts Medical Soc WOS:000642260700001
X7D2Z3A7	journalArticle	2021	Fenwick, Craig; Turelli, Priscilla; Pellaton, Celine; Farina, Alex; Campos, Jeremy; Raclot, Charlene; Pojer, Florence; Cagno, Valeria; Nussle, Semira Gonseth; D'Acremont, Valerie; Fehr, Jan; Puhan, Milo; Pantaleo, Giuseppe; Trono, Didier	A high-throughput cell- and virus-free assay shows reduced neutralization of SARS-CoV-2 variants by COVID-19 convalescent plasma	Science Translational Medicine		1946-6234	10.1126/scitranslmed.abi8452		The detection of severe acute respiratory syndrome coronavirus 2 (SARS-CoV-2)-specific antibodies in the serum of an individual indicates previous infection or vaccination. However, it provides limited insight into the protective nature of this immune response. Neutralizing antibodies recognizing the viral spike protein are more revealing, yet their measurement traditionally requires virus- and c…	2021/8/4	2022/9/20 10:55	2022/9/20 10:55		eabi8452		605	13		Sci. Transl. Med.								English							Place: Washington Publisher: Amer Assoc Advancement Science WOS:000682265600001				protection; coronavirus; impact; spike; binding; mutations
PVURFE5C	journalArticle	2021	Li, Xue; Chong, Man Yui; Chan, Ching Yui; Chan, Vindy Wing Sun; Tong, Xinning	COVID-19 vaccine preferences among university students in Hong Kong: a discrete choice experiment	Bmc Research Notes			10.1186/s13104-021-05841-z		Objective To promote public health and resume university activities, COVID-19 vaccination has been mandated from an increasing number of universities worldwide. The objective of the study is to understand the factors that impact preference and willingness to take the vaccine among university students in Hong Kong universities utilizing an online questionnaire. The findings will be imperative for …	2021/11/22	2022/9/20 10:55	2022/9/20 10:55		421		1	14		BMC Res. Notes								English							Place: London Publisher: Springernature WOS:000721965700001				COVID-19 vaccine; Discrete choice experiment; Preference and vaccination decision
6KWVHLAD	journalArticle	2021	Schoellhorn, Anna; Schuhmacher, Juliane; Besedovsky, Luciana; Fendel, Rolf; Jensen, Anja T. R.; Steyanovic, Stefan; Lange, Tanja; Rammensee, Hans-Georg; Born, Jan; Gouttefangeas, Cecile; Dimitrov, Stoyan	Integrin Activation Enables Sensitive Detection of Functional CD4(+) and CD8(+) T Cells: Application to Characterize SARS-CoV-2 Immunity	Frontiers in Immunology		1664-3224	10.3389/fimmu.2021.626308		We have previously shown that conformational change in the beta(2)-integrin is a very early activation marker that can be detected with fluorescent multimers of its ligand intercellular adhesion molecule (ICAM)-1 for rapid assessment of antigen-specific CD8(+) T cells. In this study, we describe a modified protocol of this assay for sensitive detection of functional antigen-specific CD4(+) T cell…	2021/3/29	2022/9/20 10:55	2022/9/20 10:55		626308			12		Front. Immunol.								English							Place: Lausanne Publisher: Frontiers Media Sa WOS:000639244300001				SARS-CoV-2; antigen specificity; CD4(+) T cells; CD8(+) T cells; integrin activation
KA26YR7G	journalArticle	2021	Kostaki, Evangelia Georgia; Pavlopoulos, Georgios A.; Verrou, Kleio-Maria; Ampatziadis-Michailidis, Giannis; Harokopos, Vaggelis; Hatzis, Pantelis; Moulos, Panagiotis; Siafakas, Nikolaos; Pournaras, Spyridon; Hadjichristodoulou, Christos; Chatzopoulou, Fani; Chatzidimitriou, Dimitrios; Panagopoulos, Periklis; Lourida, Panagiota; Argyraki, Aikaterini; Lytras, Theodoros; Sapounas, Spyros; Gerolymat…	Molecular Epidemiology of SARS-CoV-2 in Greece Reveals Low Rates of Onward Virus Transmission after Lifting of Travel Restrictions Based on Risk Assessment during Summer 2020	Msphere			10.1128/mSphere.00180-21		The novel coronavirus severe acute respiratory syndrome coronavirus 2 (SARS-CoV-2) spread rapidly during the first months of 2020 and continues to expand in multiple areas across the globe. Molecular epidemiology has provided an added value to traditional public health tools by identifying SARS-CoV-2 clusters or providing evidence that clusters based on virus sequences and contact tracing are hig…	Jun-21	2022/9/20 10:55	2022/9/20 10:55		e00180-21		3	6		mSphere								English							Place: Washington Publisher: Amer Soc Microbiology WOS:000718043400005				SARS-CoV-2; public health; accurate; alignment; molecular epidemiology; phylogeography; travel restrictions
VP9TS2CR	journalArticle	2021	Xu, Binyue; Zhang, Yi; Chen, Lei; Yu, Linling; Li, Lanxin; Wang, Qing	The influence of social network on COVID-19 vaccine hesitancy among healthcare workers: a cross-sectional survey in Chongqing, China	Human Vaccines & Immunotherapeutics		2164-5515	10.1080/21645515.2021.2004837		The factors that lead to coronavirus disease 2019 (COVID-19) vaccine hesitancy among health-care workers (HCWs) are unclear. We aimed to identify the factors that influence HCWs' hesitancy, especially the influence of their social network. Using an online platform, we surveyed HCWs in Chongqing, China, in January 2021 to understand the factors that influence the COVID-19 vaccine hesitancy among H…	2021/12/2	2022/9/20 10:55	2022/9/20 10:55		5048-5062		12	17		Human Vaccines Immunother.								English							Place: Philadelphia Publisher: Taylor & Francis Inc WOS:000738562100001				covid-19; acceptance; vaccine; willingness; determinants; vaccine hesitancy; coronavirus; epidemic; healthcare worker (HCW); intention; social network analysis (SNA)
XDVNCXG3	journalArticle	2021	Knezevic, Ivana; Liu, Margaret A.; Peden, Keith; Zhou, Tiequn; Kang, Hye-Na	Development of mRNA Vaccines: Scientific and Regulatory Issues	Vaccines			10.3390/vaccines9020081		The global research and development of mRNA vaccines have been prodigious over the past decade, and the work in this field has been stimulated by the urgent need for rapid development of vaccines in response to an emergent disease such as the current COVID-19 pandemic. Nevertheless, there remain gaps in our understanding of the mechanism of action of mRNA vaccines, as well as their long-term perf…	Feb-21	2022/9/20 10:55	2022/9/20 10:55		81		2	9		Vaccines								English							Place: Basel Publisher: Mdpi WOS:000623289400001				mRNA vaccines; prophylactic vaccines; regulatory considerations; system; vaccine development; WHO standards
YXEG8AKY	journalArticle	2021	Rao, Praveen P. N.; Pham, Amy Trinh; Shakeri, Arash; El Shatshat, Amna; Zhao, Yusheng; Karuturi, Rahul C.; Hefny, Ahmed A.	Drug Repurposing: Dipeptidyl Peptidase IV (DPP4) Inhibitors as Potential Agents to Treat SARS-CoV-2 (2019-nCoV) Infection	Pharmaceuticals			10.3390/ph14010044		The current outbreak of severe acute respiratory distress syndrome (SARS) or nCOVID-19 pandemic, caused by the coronavirus-2 (CoV-2), continues to wreak havoc globally. As novel vaccines are being discovered and developed, small molecule drugs still constitute a viable treatment option for SARS-CoV-2 infections due to their advantages such as superior patient compliance for oral therapies, reduce…	Jan-21	2022/9/20 10:55	2022/9/20 10:55		44		1	14		Pharmaceuticals								English							Place: Basel Publisher: Mdpi WOS:000610699000001				mechanisms; cysteine proteases; dipeptidyl peptidase IV inhibitors; drug repurposing; MERS-CoV CLpro; molecular docking; protease; SARS-CoV-2 infection; SARS-CoV-2 M-pro dimer; SARS-CoV-2 M-pro protomer; serine proteases; type-2 diabetes; vildagliptin
27QIXQ9W	journalArticle	2022	Qiao, Shan; Tam, Cheuk Chi; Li, Xiaoming	Risk Exposures, Risk Perceptions, Negative Attitudes Toward General Vaccination, and COVID-19 Vaccine Acceptance Among College Students in south Carolina	American Journal of Health Promotion		0890-1171	10.1177/08901171211028407		Purpose: The current study investigated how risk exposures, risk perceptions of COVID-19, and negative attitudes toward general vaccination were related to COVID vaccine acceptance among college students. Design: Cross-sectional study. Setting: Data was collected by online survey using RedCap among college students in South Carolina between September 2020 and October 2020. Sample: 1062 college st…	Jan-22	2022/9/20 10:55	2022/9/20 10:55		175-179		1	36		Am. J. Health Promot.								English							Place: Thousand Oaks Publisher: Sage Publications Inc WOS:000666607800001				covid-19; college students; vaccine acceptance; risk exposures; risk perceptions
NT6SJJQE	journalArticle	2021	Winter, John D.; Fletcher, Camille L.; Margolis, Greg	Vaccine-Related Liability: Past Approaches, Current Challenges, and Proposals for Encouraging Future Innovation and More Widespread Vaccine Use	Food and Drug Law Journal		1064-590X			Scientists, governments, and pharmaceutical companies face significant obstacles to global adoption of COVID-19 vaccines. Chief among these challenges are public fear of vaccine-related injury and manufacturers' fears of liability arising from those injuries. Through the lens of the COVID-19 pandemic, we explore the history and current landscape of liability related to vaccines, and we propose po…	2021	2022/9/20 10:55	2022/9/20 10:55		270-317		2	76		Food Drug Law J.								English							Place: Washington Publisher: Food Drug Law Inst WOS:000711577100004
W9PRPJCY	journalArticle	2021	Cevasco, Kevin E.; Roess, Amira A.; North, Hayley M.; Zeitoun, Sheryne A.; Wofford, Rachel N.; Matulis, Graham A.; Gregory, Abigail F.; Hassan, Maha H.; Abdo, Aya D.; von Fricken, Michael E.	Survival analysis of factors affecting the timing of COVID-19 non-pharmaceutical interventions by US universities	Bmc Public Health			10.1186/s12889-021-12035-6		Background During March of 2020 the Centers for Disease Control and Prevention (CDC) announced non-pharmaceutical intervention (NPI) guidance as the primary mitigation strategy against growing COVID-19 community spread due to the absence of a vaccine or effective treatment at that time. CDC guidance states that NPIs are most effective when instituted in an early, targeted, and layered fashion. NP…	2021/11/2	2022/9/20 10:55	2022/9/20 10:55		1985		1	21		BMC Public Health								English							Place: London Publisher: Bmc WOS:000714019800008				covid-19; united-states; influenza; community; Non-pharmaceutical interventions; Pandemic response; s; Timing; u; universities; workplace
8MQX6CGR	journalArticle	2021	Girardelli, Serena; Mullins, Edward; Lees, Christoph C.	COVID-19 and pregnancy: Lessons from 2020	Early Human Development		0378-3782	10.1016/j.earlhumdev.2021.105460		The outbreak and spread of the coronavirus disease 2019 pandemic has led to an unprecedented wealth of literature on the impact of human coronaviruses on pregnancy. The number of case studies and publications alone are several orders of magnitude larger than those published in all previous human coronavirus outbreaks combined, enabling robust conclusions to be drawn from observations for the firs…	Nov-21	2022/9/20 10:55	2022/9/20 10:55		105460			162		Early Hum. Dev.								English							Place: Clare Publisher: Elsevier Ireland Ltd WOS:000712870800007				Coronavirus; SARS-CoV-2; ability; east respiratory syndrome; Fetal; Maternal; Morbidity; Mortality; neonatal immune-response; Perinatal; Transmission; Vaccine; women
EMVVTV6A	journalArticle	2021	Iwry, Jonathan L.	FDA Emergency Use Authorization From 9/11 to COVID-19: Historical Lessons and Ethical Challenges	Food and Drug Law Journal		1064-590X			Emergency use authorization (EUA) is a power granted by Congress to FDA to expedite the availability and distribution of medical countermeasures during public health emergencies. This Article reviews the history of FDA's EUA authority from its inception in the post-9/11 era to its present-day use in response to COVID-19 in order to better understand and anticipate the limitations, potential, and …	2021	2022/9/20 10:55	2022/9/20 10:55		337-380		2	76		Food Drug Law J.								English							Place: Washington Publisher: Food Drug Law Inst WOS:000711577100006
HGTUF5B6	journalArticle	2021	Pavel, Shaikh Terkis Islam; Yetiskin, Hazel; Uygut, Muhammet Ali; Aslan, Ahmet Furkan; Aydin, Gunsu; Inan, Oznur; Kaplan, Busra; Ozdarendeli, Aykut	Development of an Inactivated Vaccine against SARS CoV-2	Vaccines			10.3390/vaccines9111266		The rapid spread of SARS-CoV-2 with its mutating strains has posed a global threat to safety during this COVID-19 pandemic. Thus far, there are 123 candidate vaccines in human clinical trials and more than 190 candidates in preclinical development worldwide as per the WHO on 1 October 2021. The various types of vaccines that are currently approved for emergency use include viral vectors (e.g., ad…	Nov-21	2022/9/20 10:55	2022/9/20 10:55		1266		11	9		Vaccines								English							Place: Basel Publisher: Mdpi WOS:000725837600001				SARS-CoV-2; vaccine; sars-cov-2; COVID-19 vaccine; efficacy; ERUCoV-VAC; immunogenicity; inactivated vaccine; infection; models; turkovac
9KXQENIQ	journalArticle	2021	Lustig, Yaniv; Zuckerman, Neta; Nemet, Ital; Atari, Nofar; Kliker, Limor; Regev-Yochay, Gili; Sapir, Einav; Mor, Orna; Alroy-Preis, Sharon; Mendelson, Ella; Mandelboim, Michal	Neutralising capacity against Delta (B.1.617.2) and other variants of concern following Comirnaty (BNT162b2, BioNTech/Pfizer) vaccination in health care workers, Israel	Eurosurveillance		1025-496X	10.2807/1560-7917.ES.2021.26.26.2100557		SARS-CoV-2 Delta (B.1.617.2) variant of concern (VOC) and other VOCs are spreading in Europe. Micro-neutralisation assays with sera obtained after Comirnaty (BNT162b2, BioNTech/Pfizer) vaccination in 36 healthcare workers (31 female) demonstrated significant fold change reduction in neutralising titres compared with the original virus: Gamma (P.1) 2.3, Beta (B.1.351) 10.4, Delta 2.1 and 2.6. The …	2021/7/1	2022/9/20 10:55	2022/9/20 10:55		2100557		26	26		Eurosurveillance								English							Place: Stockholm Publisher: Eur Centre Dis Prevention & Control WOS:000669020300002
NW4KBCUY	journalArticle	2021	Kiem, Cecile Tran; Andronico, Alessio; Bosetti, Paolo; Paireau, Juliette; Alter, Lise; Boelle, Pierre-Yves; Fontanet, Arnaud; Levy-Bruhl, Daniel; Cauchemez, Simon	Benefits and risks associated with different uses of the COVID-19 vaccine Vaxzevria: a modelling study, France, May to September 2021	Eurosurveillance		1025-496X	10.2807/1560-7917.ES.2021.26.26.2100533		Thrombosis with thrombocytopenia (TTS) has been identified as a rare adverse event following COVID-19 vaccination with Vaxzevria. We modelled the benefits and risks of Vaxzevria distribution from May to September 2021 in metropolitan France where other vaccines are available, considering French hospitalisation data and European data on TTS. Across different scenarios, benefits of Vaxzevria distri…	2021/7/1	2022/9/20 10:55	2022/9/20 10:55		2100533		26	26		Eurosurveillance								English							Place: Stockholm Publisher: Eur Centre Dis Prevention & Control WOS:000669020300001
6QKV82QF	journalArticle	2021	Bardenheier, Barbara H.; Gravenstein, Stefan; Blackman, Carolyn; Gutman, Roee; Sarkar, Indra Neil; Feifer, Richard A.; White, Elizabeth M.; McConeghy, Kevin; Nanda, Aman; Mor, Vincent	Adverse events following mRNA SARS-CoV-2 vaccination among US nursing home residents	Vaccine		0264-410X	10.1016/j.vaccine.2021.05.088		Background: The devastating impact of the SARS-CoV-2 pandemic prompted the development and emergency use authorization of two mRNA vaccines in early 2020. Vaccine trials excluded nursing home (NH) residents, limiting adverse event data that directly apply to this population. Methods: To prospectively monitor for potential adverse events associated with vaccination, we used Electronic Health Recor…	2021/6/29	2022/9/20 10:55	2022/9/20 10:55		3844-3851		29	39		Vaccine								English							Place: Oxford Publisher: Elsevier Sci Ltd WOS:000663773600010				safety; SARS-CoV-2 mRNA vaccines; Skilled nursing facilities; Vaccine safety monitoring
5AXSMRMX	journalArticle	2021	Hategeka, Celestin; Carter, Simone E.; Chenge, Faustin Mukalenge; Katanga, Eric Nyambu; Lurton, Gregoire; Mayaka, Serge Ma-Nitu; Mwamba, Dieudonne Kazadi; van Kleef, Esther; Vanlerberghe, Veerle; Grepin, Karen Ann	Impact of the COVID-19 pandemic and response on the utilisation of health services in public facilities during the first wave in Kinshasa, the Democratic Republic of the Congo	Bmj Global Health		2059-7908	10.1136/bmjgh-2021-005955		Introduction Health service use among the public can decline during outbreaks and had been predicted among low and middle-income countries during the COVID-19 pandemic. In March 2020, the government of the Democratic Republic of the Congo (DRC) started implementing public health measures across Kinshasa, including strict lockdown measures in the Gombe health zone. Methods Using monthly time serie…	2021	2022/9/20 10:55	2022/9/20 10:55		e005955		7	6		BMJ Glob. Health								English							Place: London Publisher: Bmj Publishing Group WOS:000691869200001				covid-19; epidemic; diseases; disorders; ebola; guinea; health policy; health services research; health systems; infections; injuries
JSU8QS7N	journalArticle	2021	Zuercher, Kathrin; Mugglin, Catrina; Egger, Matthias; Mueller, Sandro; Fluri, Michael; Bolick, Laurence; Piso, Rein Jan; Hoffmann, Matthias; Fenner, Lukas	Vaccination willingness for COVID-19 among healthcare workers: a cross-sectional survey in a Swiss canton	Swiss Medical Weekly		1424-7860	10.4414/SMW.2021.w30061		AIMS OF THE STUDY: Vaccination is regarded as the most promising response to the COVID-19 pandemic. We assessed opinions about COVID-19 vaccination, willingness to be vaccinated, and reasons for vaccination hesitancy among healthcare workers. METHODS: We conducted a cross-sectional, web-based survey among 3,793 healthcare workers in December 2020 in the Canton of Solothurn, Switzerland, before th…	2021/9/15	2022/9/20 10:55	2022/9/20 10:55		w30061			151		Swiss Med. Wkly.								English							Place: Muttenz Publisher: E M H Swiss Medical Publishers Ltd WOS:000752047800001				disease; hesitancy; infection; attitudes; knowledge; trust
JJV8Y49S	journalArticle		Rountree, Claire; Prentice, Garry	Segmentation of intentions towards COVID-19 vaccine acceptance through political and health behaviour explanatory models	Irish Journal of Medical Science		0021-1265	10.1007/s11845-021-02852-4		Background Management of the COVID-19 pandemic has been plagued by an online 'infodemic', not least on the topic of vaccine safety. Failure to vaccinate is often addressed with corrective, factually based information. However, this may be overly simplistic. European vaccine hesitancy levels correlate closely with popularity of populist parties while scientific populism refers specifically to popu…		2022/9/20 10:55	2022/9/20 10:55							Irish J. Med. Sci.								English							Place: London Publisher: Springer London Ltd WOS:000722795600001				determinants; efficacy; trust; adults; anticipated regret; beliefs; Health belief model; Populism; Segmentation; Theory of planned behaviour; Vaccines
8B94VI7Z	journalArticle	2021	Scoccimarro, Daniele; Panichi, Lorenzo; Ragghianti, Benedetta; Silverii, Antonio; Mannucci, Edoardo; Monami, Matteo	Sars-CoV2 vaccine hesitancy in Italy: A survey on subjects with diabetes	Nutrition Metabolism and Cardiovascular Diseases		0939-4753	10.1016/j.numecd.2021.09.002		Background and aims: Vaccine Hesitancy (VH) is a relevant obstacle for the COVID-19 vaccination campaign. The aim of this study is to assess the proportion of subjects unwilling to vaccinate among patients with type 1 (T1DM) and 2 (T2DM) diabetes, exploring factors associated with VH. Methods and results: A purposely created interview was delivered from physicians to a consecutive series of adult…	2021/10/28	2022/9/20 10:55	2022/9/20 10:55		3243-3246		11	31		Nutr. Metab. Carbiovasc. Dis.								English							Place: Oxford Publisher: Elsevier Sci Ltd WOS:000711988700029				Covid-19; Vaccine hesitancy; Diabetes; Obesity
N2JHUF94	journalArticle	2021	Geerling, Elizabeth; Stone, E. Taylor; Steffen, Tara L.; Hassert, Mariah; Brien, James D.; Pinto, Amelia K.	Obesity Enhances Disease Severity in Female Mice Following West Nile Virus Infection	Frontiers in Immunology		1664-3224	10.3389/fimmu.2021.739025		A rise in adiposity in the United States has resulted in more than 70% of adults being overweight or obese, and global obesity rates have tripled since 1975. Following the 2009 H1N1 pandemic, obesity was characterized as a risk factor that could predict severe infection outcomes to viral infection. Amidst the SARS-CoV-2 pandemic, obesity has remained a significant risk factor for severe viral dis…	2021/8/31	2022/9/20 10:55	2022/9/20 10:55		739025			12		Front. Immunol.								English							Place: Lausanne Publisher: Frontiers Media Sa WOS:000697977200001				mortality; influenza; vaccination; outbreak; immunity; efficacy; antibody prophylaxis; cd8(+) t-cells; chronic inflammation; diet-induced obesity; encephalitis; neutralizing antibody; obesity; risk-factors; sex difference; viral infection; West Nile virus
AAJMU6GQ	journalArticle	2021	Mburu, C. N.; Ojal, J.; Chebet, R.; Akech, D.; Karia, B.; Tuju, J.; Sigilai, A.; Abbas, K.; Jit, M.; Funk, S.; Smits, G.; van Gageldonk, P. G. M.; van der Klis, F. R. M.; Tabu, C.; Nokes, D. J.; Scott, J. A. G.; Flasche, S.; Adetifa, I. M. O.	The importance of supplementary immunisation activities to prevent measles outbreaks during the COVID-19 pandemic in Kenya	Bmc Medicine		1741-7015	10.1186/s12916-021-01906-9		BackgroundThe COVID-19 pandemic has disrupted routine measles immunisation and supplementary immunisation activities (SIAs) in most countries including Kenya. We assessed the risk of measles outbreaks during the pandemic in Kenya as a case study for the African Region.MethodsCombining measles serological data, local contact patterns, and vaccination coverage into a cohort model, we predicted the …	2021/2/3	2022/9/20 10:55	2022/9/20 10:55		35		1	19		BMC Med.								English							Place: London Publisher: Bmc WOS:000616609000001				covid-19; vaccination; health; igg; Measles; Outbreak; risk; Supplementary immunisation activities; Vaccination coverage
YN6UNB4C	journalArticle	2022	Ripabelli, Giancarlo; Tamburro, Manuela; Buccieri, Nicandro; Adesso, Carmen; Caggiano, Valeria; Cannizzaro, Fabio; Di Palma, Michela Anna; Mantuano, Gloria; Montemitro, Valeria Giovanna; Natale, Anna; Rodio, Leonardo; Sammarco, Michela Lucia	Active Surveillance of Adverse Events in Healthcare Workers Recipients After Vaccination with COVID-19 BNT162b2 Vaccine (Pfizer-BioNTech, Comirnaty): A Cross-Sectional Study	Journal of Community Health		0094-5145	10.1007/s10900-021-01039-3		In this cross-sectional study, adverse events after the first and second dose of BNT162b2 mRNA (Pfizer-BioNTech, Comirnaty) vaccine against coronavirus disease 2019 were investigated among employees of clinics in central Italy. A 42-items questionnaire was administrated to vaccine recipients. Adverse events were classified based on severity and occurrence as reported in the literature. A descript…	Apr-22	2022/9/20 10:55	2022/9/20 10:55		211-225		2	47		J. Community Health								English							Place: New York Publisher: Springer WOS:000705786900001				responses; infections; BNT162b2 mRNA vaccine; First dose; Safety; Second dose; sex; Sex differences; Younger adults
HTWRWUXZ	journalArticle	2021	Xing, Xiaofan; Xiong, Yuankang; Yang, Ruipu; Wang, Rong; Wang, Weibing; Kan, Haidong; Lu, Tun; Li, Dongsheng; Cao, Junji; Penuelas, Josep; Ciais, Philippe; Bauer, Nico; Boucher, Olivier; Balkanski, Yves; Hauglustaine, Didier; Brasseur, Guy; Morawska, Lidia; Janssens, Ivan A.; Wang, Xiangrong; Sardans, Jordi; Wang, Yijing; Deng, Yifei; Wang, Lin; Chen, Jianmin; Tang, Xu; Zhang, Renhe	Predicting the effect of confinement on the COVID-19 spread using machine learning enriched with satellite air pollution observations	Proceedings of the National Academy of Sciences of the United States of America		0027-8424	10.1073/pnas.2109098118		The real-time monitoring of reductions of economic activity by containment measures and its effect on the transmission of the coronavirus (COVID-19) is a critical unanswered question. We inferred 5,642 weekly activity anomalies from the meteorology-adjusted differences in spaceborne tropospheric NO2 column concentrations after the 2020 COVID-19 outbreak relative to the baseline from 2016 to 2019.…	2021/8/17	2022/9/20 10:55	2022/9/20 10:55		e2109098118		33	118		Proc. Natl. Acad. Sci. U. S. A.								English							Place: Washington Publisher: Natl Acad Sciences WOS:000689727700005				covid-19; infection; air pollution; china; error; machine learning; no2; pandemic management; satellite observation; time
BX2NAYDL	journalArticle	2022	Nath, Sandy Simcha; Yadav, Nandini Umesh; Derkach, Andriy; Perez-Johnston, Rocio; Tachiki, Lisa; Maguire, Kelsey; Babar, Afia; Maloy, Molly A.; Klotz, Adam; Jee, Justin; Taur, Ying; Chawla, Sanjay; Babady, Esther; Khaki, Ali Raza; Madeleine, Margaret M.; Grivas, Petros; Henning, Daniel J.; Aaltonen, Laura; Lyman, Gary H.; Groeger, Jeffrey	Outcomes of Patients with COVID-19 from a Specialized Cancer Care Emergency Room	Cancer Investigation		0735-7907	10.1080/07357907.2021.1985134		Purpose Our goal was to identify discrete clinical characteristics associated with safe discharge from an emergency department/urgent care for patients with a history of cancer and concurrent COVID-19 infection during the SARS-CoV-2 pandemic and prior to widespread vaccination. Patients and Methods We retrospectively analyzed 255 adult patients with a history of cancer who presented to Memorial S…	2022/1/2	2022/9/20 10:55	2022/9/20 10:55		17-25		1	40		Cancer Invest.								English							Place: Philadelphia Publisher: Taylor & Francis Inc WOS:000712123800001				covid-19; biostatistics; decision analysis outcomes; medical utilization
H4CV9FEF	journalArticle	2021	Kracov, Daniel A.	Preparing for Disease X: History, Legislative Innovation, and Future Pandemics	Food and Drug Law Journal		1064-590X			Given the uncertain attributes of future pathogens, the next pandemic (or bioterror) threat may place an even greater premium on the availability of effective diagnostics, prophylactics, and treatments-at large scale-at the earliest stage of a pandemic, before hundreds of thousands have died and our economy is devastated. This Article traces the mixed history of our efforts to support and incenti…	2021	2022/9/20 10:55	2022/9/20 10:55		177-199		2	76		Food Drug Law J.								English							Place: Washington Publisher: Food Drug Law Inst WOS:000711577100001				implementation; market
UMPSHMVF	journalArticle	2021	Liu, Zi-Han; Bai, Wei; Cai, Hong; Liu, Shou; Chen, Xu; Qi, Han; Liu, Rui; Cheung, Teris; Su, Zhaohui; Jackson, Todd; Sha, Sha; Xiang, Yu-Tao	Body Appreciation as a Factor Associated with College Students' Willingness to Receive Future COVID-19 Vaccines	Vaccines			10.3390/vaccines9111285		Background: Following the initial manufacture of COVID-19 vaccines, numerous studies have investigated factors that influence people's vaccination intentions. However, no studies have examined links of vaccination attitudes with body-related attitudes, especially body appreciation. To address this gap in the literature, we conducted this study to disentangle the relationship between college stude…	Nov-21	2022/9/20 10:55	2022/9/20 10:55		1285		11	9		Vaccines								English							Place: Basel Publisher: Mdpi WOS:000723347300001				COVID-19 vaccine; attitudes; health; body appreciation; college student; image; vaccination intentions
LKW8UJPB	journalArticle	2021	Evangelista de Araujo, Telma Maria; Calixto de Carvalho, Ayla Maria; Fronteira, Ines; de Sena Silva, Andreia Alves; Rodrigues, Karoline Alencar; Queiroz, Gessica Soares; de Abrantes Carcara, Lorena Rocha	COVID-19 vaccine acceptance among the public diagnosed with the flu-like syndrome	Acta Paulista De Enfermagem		0103-2100	10.37689/acta-ape/2021AO000086		Objective: To analyze COVID-19 vaccine acceptance among people diagnosed with flu-like illness. Methods: This is a cross-sectional study with a random sample consisting of 454 participants. Data were collected from March to August 2020, in two stages: in the first, data available in the information systems were collected, using an instrument adapted from the investigation form of flu-like illness…	2021	2022/9/20 10:55	2022/9/20 10:55		eAPE000086			34		Acta Paul. Enferm.								English							Place: Sao Paulo Publisher: Univ Fed Sao Paulo, Dept Enfermagen WOS:000749756500008				covid-19; Coronavirus infections; Public health; Vaccines; Adult; Medication adherence
JLSXAATX	journalArticle	2021	Tegegne, Alemnew Wale; Gidafie, Aychew Kassie; Mamo, Desalegn Girma; Wassie, Semahegn Tilahun; Mengie, Zinie Abita	Immunization Status and Challenges During COVID-19 and Associated Factors Among Children Aged 10-23 Months in South Region, Ethiopia 2020	Pediatric Health Medicine and Therapeutics			10.2147/PHMT.S294739		Background: The worldwide COVID-19 pandemic is overstressing health systems and Essential health services and vaccination services are disrupted. Immunization is a confirmed gizmo for governing and even eliminating communicable diseases. Objective: This study aims to assess the challenge and status of immunization during COVID-19 and associated factors among children aged 10-23 months south Natio…	2021	2022/9/20 10:55	2022/9/20 10:55		101-109			12		Pediatr. Health Med. Ther.								English							Place: Albany Publisher: Dove Medical Press Ltd WOS:000630373300001				challenge; children 12-23-month-old; immunization status; southwest Ethiopia
7DP7HWI2	journalArticle	2021	Stuurman, Anke L.; Biccler, Jorne; Carmona, Antonio; Descamps, Alexandre; Diez-Domingo, Javier; Quiles, Cintia Munoz; Nohynek, Hanna; Rizzo, Caterina; Riera-Montes, Margarita	Brand-specific influenza vaccine effectiveness estimates during 2019/20 season in Europe - Results from the DRIVE EU study platform	Vaccine		0264-410X	10.1016/j.vaccine.2021.05.059		DRIVE (Development of Robust and Innovative Vaccine Effectiveness) is an IMI funded public-private platform that aims to annually estimate brand-specific influenza vaccine effectiveness (IVE), for public health and regulatory purposes. IVE analyses and reporting are conducted by public partners in the consortium. In 2019/20, four primary care-based test-negative design (TND) studies (Austria, Eng…	2021/6/29	2022/9/20 10:55	2022/9/20 10:55		3964-3973		29	39		Vaccine								English							Place: Oxford Publisher: Elsevier Sci Ltd WOS:000663773600023				Europe; Influenza; Public-private partnership; sensitivity; Test-negative design; Vaccine effectiveness
PBGGW7LD	journalArticle	2021	Thilagar, Bright; Beidoun, Mohammad; Rhoades, Ruben; Kaatz, Scott	COVID-19 and thrombosis: searching for evidence	Hematology-American Society of Hematology Education Program		1520-4391	10.1182/hematology.2021000298		Early in the pandemic, COVID-19-related increases in rates of venous and arterial thromboembolism were seen. Many observational studies suggested a benefit of prophylactic anticoagulation for hospitalized patients using various dosing strategies. Randomized trials were initiated to compare the efficacy of these different options in acutely ill and critically ill inpatients as the concept of immun…	2021/12/10	2022/9/20 10:55	2022/9/20 10:55		621-627		1			Hematol.-Am. Soc. Hematol. Educ. Program								English							Place: Washington Publisher: Amer Soc Hematology WOS:000731207900080				complications
8MGAHA35	journalArticle		Sarkar, Bishajit; Ullah, Md Asad; Araf, Yusha; Islam, Nafisa Nawal; Zohora, Umme Salma	Immunoinformatics-guided designing and in silico analysis of epitope-based polyvalent vaccines against multiple strains of human coronavirus (HCoV)	Expert Review of Vaccines		1476-0584	10.1080/14760584.2021.1874925		Objectives: The group of human coronaviruses (HCoVs) consists of some highly pathogenic viruses that have caused several outbreaks in the past. The newly emerged strain of HCoV, the SARS-CoV-2 is responsible for the recent global pandemic that has already caused the death of hundreds of thousands of people due to the lack of effective therapeutic options. Methods: In this study, immunoinformatics…		2022/9/20 10:55	2022/9/20 10:55							Expert Rev. Vaccines								English							Place: Abingdon Publisher: Taylor & Francis Ltd WOS:000629084300001				vaccines; alignment; cells; Coronaviruses; identification; immunoinformatics; mers-CoV; peptide; prediction; protein; sars-CoV; sars-CoV-2; server; toll-like receptors
GAKGIWTN	journalArticle	2021	Zhang, Nan; Chan, Pak-To Jack; Jia, Wei; Dung, Chung-Hin; Zhao, Pengcheng; Lei, Hao; Su, Boni; Xue, Peng; Zhang, Weirong; Xie, Jingchao; Li, Yuguo	Analysis of efficacy of intervention strategies for COVID-19 transmission: A case study of Hong Kong	Environment International		0160-4120	10.1016/j.envint.2021.106723		By the end of February 2021, COVID-19 had spread to over 230 countries, with more than 100 million confirmed cases and 2.5 million deaths. To control infection spread with the least disruption to economic and societal activities, it is crucial to implement the various interventions effectively. In this study, we developed an agentbased SEIR model, using real demographic and geographic data from H…	Nov-21	2022/9/20 10:55	2022/9/20 10:55		106723			156		Environ. Int.								English							Place: Oxford Publisher: Pergamon-Elsevier Science Ltd WOS:000686786000011				covid-19; disease; influenza; coronavirus; impact; Vaccine; china; Close contact; epidemics; Mask; SEIR model; Temperature screening; trend
C5R3INSS	journalArticle	2021	Aizawa, Yuta; Katsuta, Tomohiro; Sakiyama, Hiroshi; Tanaka-Taya, Keiko; Moriuchi, Hiroyuki; Saitoh, Akihiko	Changes in childhood vaccination during the coronavirus disease 2019 pandemic in Japan	Vaccine		0264-410X	10.1016/j.vaccine.2021.05.050		Background: The coronavirus disease 2019 (COVID-19) pandemic has greatly affected daily life. COVID-19 often causes asymptomatic or mild disease in children; however, delayed routine childhood immuniza-tion is a concern, as it could increase the risk of vaccine-preventable disease. No study has evaluated the status of childhood vaccinations in Japan during the COVID-19 pandemic. Methods: This ret…	2021/6/29	2022/9/20 10:55	2022/9/20 10:55		4006-4012		29	39		Vaccine								English							Place: Oxford Publisher: Elsevier Sci Ltd WOS:000663773600028				covid-19; impact; Vaccination; Children; children; Infants; measles outbreak; Pandemic; registry; Routine immunization
IX56QFTC	journalArticle	2021	Essler, Jennifer L.; Kane, Sarah A.; Nolan, Pat; Akaho, Elikplim H.; Berna, Amalia Z.; DeAngelo, Annemarie; Berk, Richard A.; Kaynaroglu, Patricia; Plymouth, Victoria L.; Frank, Ian D.; Weiss, Susan R.; John, Audrey R. Odom; Otto, Cynthia M.	Discrimination of SARS-CoV-2 infected patient samples by detection dogs: A proof of concept study	Plos One		1932-6203	10.1371/journal.pone.0250158		While the world awaits a widely available COVID-19 vaccine, availability of testing is limited in many regions and can be further compounded by shortages of reagents, prolonged processing time and delayed results. One approach to rapid testing is to leverage the volatile organic compound (VOC) signature of SARS-CoV-2 infection. Detection dogs, a biological sensor of VOCs, were utilized to investi…	2021/4/14	2022/9/20 10:55	2022/9/20 10:55		e0250158		4	16		PLoS One								English							Place: San Francisco Publisher: Public Library Science WOS:000640604500041
66I2I5XA	journalArticle	2021	Park, Kathleen Marshall	Navigating the digital revolution and crisis times: humanitarian and innovation-inspired leadership through the pandemic	Journal of Strategy and Management		1755-425X	10.1108/JSMA-01-2021-0021		Purpose - This article examines the leadership vision, values and vigilance of an emerging markets logistics firm in managing customer and humanitarian concerns and critical supply chains during the COVID-19 pandemic. The study explores how an emerging markets firm has contributed to global supply chain mobility and vaccine distribution in the pandemic - keeping cargo moving - drawing on vision, …	2021/10/16	2022/9/20 10:55	2022/9/20 10:55		360-377		3	14		J. Strategy Manag.								English							Place: Bingley Publisher: Emerald Group Publishing Ltd WOS:000670704000001				covid-19; Pandemic; Agility; Digital revolution; Digital disruptions; Digital supply chains; foreignness; gcc/mena; Humanitarian partnerships; Innovation; Leadership; liability; Logistics; Middle East; program
W9WSWNT2	journalArticle	2021	Kubota, So	The macroeconomics of COVID-19 exit strategy: the case of Japan	Japanese Economic Review		1352-4739	10.1007/s42973-021-00091-x		In this paper, I use a simple SIR Macro model to examine Japan's soft lockdown policies in 2021 under the COVID-19 crisis. As real-time research, this paper consists of two parts written during two different research periods. The first part, which was originally reported in February 2021, studies the Japan's second soft lockdown policy (state of emergency declaration) from January to March 2021. …	Oct-21	2022/9/20 10:55	2022/9/20 10:55		651-682		4	72		Jpn. Econ. Rev.								English							Place: Heidelberg Publisher: Springer Heidelberg WOS:000687934500001				covid-19; Vaccine; Japan; Lockdown; Macroeconomics; sir
S4GXD2XJ	journalArticle	2021	Bano, Fehmida; Badugama, Buddikha; Chandra, Deepak	Thrombosis and thrombocytopaenia after ChAdOx1 nCoV-19 vaccination: a single UK centre experience	Bmj Case Reports			10.1136/bcr-2021-243894		We report clinical findings of three patients presenting with thrombosis and thrombocytopaenia 10-16 days following the first dose of the ChAdOx1 nCoV-19 vaccine against SARS-CoV-2. All patients presented to a major university teaching hospital in the UK over a 5-day period and were found to have high-titre antibodies against platelet factor 4 (PF4) without previous exposure to heparin. All three…	Jul-21	2022/9/20 10:55	2022/9/20 10:55		e243894		7	14		BMJ Case Rep.								English							Place: London Publisher: Bmj Publishing Group WOS:000674647000015				vaccination; immunisation; venous thromboembolism
MZSLPWTU	journalArticle	2022	Uddin, Reaz; Jalal, Khurshid; Khan, Kanwal; Ul-Haq, Zaheer	Re-purposing of hepatitis C virus FDA approved direct acting antivirals as potential SARS-CoV-2 protease inhibitors	Journal of Molecular Structure		0022-2860	10.1016/j.molstruc.2021.131920		A new coronavirus strain called as SARS-CoV-2 has emerged from Wuhan, China in late 2019 and it caused a worldwide pandemic in a few months. After the Second World War, it is the biggest calamity observed as there is no specific US Food and Drugs Administration (USFDA) approved drug or vaccine available globally for the treatment. Several clinical trials are ongoing for therapeutic alternatives, …	2022/2/15	2022/9/20 10:55	2022/9/20 10:55		131920			1250		J. Mol. Struct.								English							Patent Number: 3 Place: Amsterdam Publisher: Elsevier WOS:000744666800008				SARS-CoV-2; design; Direct Acting Antivirals (DAAs); Drug re-purposing; Hepatitis C Virus; Mpro protease; Protease inhibitors
V4S8UL6D	journalArticle	2021	Ameme, Donne Kofi; Odikro, Magdalene Akos; Baidoo, Abraham; Dsane-Aidoo, Paul; Nuvey, Francis Sena; Jackson, Dikena Garmonyou; Mohammed, Abdul Gafaru; Alemna, Felicia; Tender, Emmanuel Kwame; Ghartey, Georgia Naa Korkoi; Wullar, Oxygen Gershion; Maximore, Leroy; Asamoah, Yaw Karikari; Kenu, Ernest	Hand hygiene and face mask wearing practices for COVID-19 prevention: a non-intrusive observation of patrons of community convenience shops in Accra, Ghana	Pan African Medical Journal			10.11604/pamj.2021.40.195.26195		Introduction: in the absence of a vaccine and definitive treatment, non-pharmacological measures of physical distancing, regular hand hygiene and wearing of face covering remain the mainstays of mitigating coronavirus disease 2019 (COVID-19). In Ghana, these measures are mandatory in public places and underpin COVID-19 infection prevention and control (IPC). We assessed adherence and appropriate …	2021/12/1	2022/9/20 10:55	2022/9/20 10:55		195			40		Pan Afr. Med. J.								English							Place: Kampala Publisher: African Field Epidemiology Network-Afenet WOS:000790817500003				covid-19; Adherence; behavior; face covering; handwashing; infection prevention
Q4LQD5DU	journalArticle	2021	Li, Junjiang; Giabbanelli, Philippe	Returning to a Normal Life via COVID-19 Vaccines in the United States: A Large-scale Agent-Based Simulation Study	Jmir Medical Informatics			10.2196/27419		Background: In 2020, COVID-19 has claimed more than 300,000 deaths in the United States alone. Although nonpharmaceutical interventions were implemented by federal and state governments in the United States, these efforts have failed to contain the virus. Following the Food and Drug Administration's approval of two COVID-19 vaccines, however, the hope for the return to normalcy has been renewed. …	Apr-21	2022/9/20 10:55	2022/9/20 10:55		e27419		4	9		JMIR Med. Inf.								English							Place: Toronto Publisher: Jmir Publications, Inc WOS:000646051700025				model; covid-19; vaccine; willingness; impact; epidemic; agent-based; agent-based model; capacity; cloud-based simulations; dynamics; effective; interaction; intervention; large-scale simulations; outcome; plan; scenario; seir; simulation; strategy; United States
H78JH9DQ	journalArticle	2021	Gong, Lejun; Zhang, Xingxing; Zhang, Li; Gao, Zhihong	Predicting Genotype Information Related to COVID-19 for Molecular Mechanism Based on Computational Methods	Cmes-Computer Modeling in Engineering & Sciences		1526-1492	10.32604/cmes.2021.016622		Novel coronavirus disease 2019 (COVID-19) is an ongoing health emergency. Several studies are related to COVID-19. However, its molecular mechanism remains unclear. The rapid publication of COVID-19 provides a new way to elucidate its mechanism through computational methods. This paper proposes a prediction method for mining genotype information related to COVID-19 from the perspective of molecul…	2021	2022/9/20 10:55	2022/9/20 10:55		31-45		1	129		CMES-Comp. Model. Eng. Sci.								English							Place: Henderson Publisher: Tech Science Press WOS:000688417500002				covid-19; SARS-CoV-2; vaccines; machine learning; bioinformatics; computational method; genes; genotype; papain-like protease; pathways; sars; semantic similarity
ER8JIN88	journalArticle	2021	Alhassan, Robert Kaba; Owusu-Agyei, Seth; Ansah, Evelyn Korkor; Gyapong, Margaret	COVID-19 vaccine uptake among health care workers in Ghana: a case for targeted vaccine deployment campaigns in the global south	Human Resources for Health			10.1186/s12960-021-00657-1		Background Health care workers (HCWs) are among the high-risk groups in contracting and dying from COVID-19. World Health Organization estimates that over 10,000 HCWs in Africa have been infected with COVID-19 making it a significant occupational health hazard to HCWs. In Ghana, over 100 HCWs have already been infected and dozen others died from the virus. Acceptability and uptake of the COVID-19…	2021/11/6	2022/9/20 10:55	2022/9/20 10:55		136		1	19		Hum. Resour. Health								English							Place: London Publisher: Bmc WOS:000715023400001				Vaccine; Coronavirus disease 2019 (COVID-19); Ghana; Health care workers; Trial; Uptake; Willingness
ZY92PA6R	journalArticle	2022	Thorpe, Kenneth E.; Joski, Peter J.	SARS-CoV-2 Outcomes: The Role of Patient Characteristics and Chronic Disease Comorbidities	Population Health Management		1942-7891	10.1089/pop.2021.0116		Several patient demographics such as race/ethnicity and comorbid chronic conditions are associated with severity of illness among COVID-19 patients. This study examines national data of COVID-19 patients to estimate the likelihood that these characteristics are associated with a hospital admission, admission to an intensive care unit (ICU), and length of hospital stay. Using logistic regressions,…	2022/2/1	2022/9/20 10:55	2022/9/20 10:55		86-90		1	25		Popul. Health Manag.								English							Place: New Rochelle Publisher: Mary Ann Liebert, Inc WOS:000695244300001				covid-19; chronic disease; hospital use
A2UCZ49U	journalArticle	2021	Rose, Deja R.; Mahadeen, Khmad Z.; Carlson, Alise K.; Planchon, Sarah M.; Sedlak, Jennifer; Husak, Scott; Bermel, Robert A.; Cohen, Jeffrey A.; Moss, Brandon P.	Clinical features and outcomes of COVID-19 despite SARS-CoV-2 vaccination in people with multiple sclerosis	Multiple Sclerosis Journal-Experimental Translational and Clinical			10.1177/20552173211057110		Background: Several studies have demonstrated reduced serological response to vaccines in patients treated with anti-CD20 agents. However, limited data exist surrounding the clinical effect of disease modifying therapy (DMT) use on vaccine efficacy. Objectives: To investigate breakthrough coronavirus disease 2019 (COVID-19) in vaccinated people with multiple sclerosis (PwMS) on DMT. Methods: PwMS…	Oct-21	2022/9/20 10:55	2022/9/20 10:55		2.05522E+16		4	7		Mult. Scler. J. Exp. Transl. Clin.								English							Place: Thousand Oaks Publisher: Sage Publications Inc WOS:000724554700001				covid-19; disease-modifying therapy; multiple sclerosis
3Q4QZH6U	journalArticle	2021	Pirnay, Jean-Paul; Selhorst, Philippe; Hong, Samuel L.; Cochez, Christel; Potter, Barney; Maes, Piet; Petrillo, Mauro; Dudas, Gytis; Claes, Vincent; Van der Beken, Yolien; Verbeken, Gilbert; Degueldre, Julie; Dellicour, Simon; Cuypers, Lize; T'Sas, France; Van den Eede, Guy; Verhasselt, Bruno; Weuts, Wouter; Smets, Cedric; Mertens, Jan; Geeraerts, Philippe; Arien, Kevin K.; Andre, Emmanuel; Neiri…	Variant Analysis of SARS-CoV-2 Genomes from Belgian Military Personnel Engaged in Overseas Missions and Operations	Viruses-Basel			10.3390/v13071359		More than a year after the first identification of severe acute respiratory syndrome coronavirus 2 (SARS-CoV-2) as the causative agent of the 2019 coronavirus disease (COVID-19) in China, the emergence and spread of genomic variants of this virus through travel raise concerns regarding the introduction of lineages in previously unaffected regions, requiring adequate containment strategies. Concom…	Jul-21	2022/9/20 10:55	2022/9/20 10:55		1359		7	13		Viruses-Basel								English							Place: Basel Publisher: Mdpi WOS:000677138900001				covid-19; SARS-CoV-2; outbreak; genomic epidemiology; military; variants
XPNB6WPT	journalArticle	2021	Harrison, Jill; Berry, Sarah; Mor, Vince; Gifford, David	"Somebody Like Me": Understanding COVID-19 Vaccine Hesitancy among Staff in Skilled Nursing Facilities	Journal of the American Medical Directors Association		1525-8610	10.1016/j.jamda.2021.03.0121525-8610/		Objective: The vaccination of skilled nursing facility (SNF) staff is a critical component in the battle against COVID-19. Together, residents and staff constitute the single most vulnerable population in the pandemic. The health of these workers is completely entangled with the health of those they care for. Vaccination of SNF staff is key to increasing uptake of the vaccine, reducing health dis…	Jun-21	2022/9/20 10:55	2022/9/20 10:55		1133-1137		6	22		J. Am. Med. Dir. Assoc.								English							Place: New York Publisher: Elsevier Science Inc WOS:000659464600005				covid-19; vaccination; skilled nursing facilities
NS5JWZ35	journalArticle	2021	Yang, Yang; Yang, Peng; Huang, Cong; Wu, Yuming; Zhou, Zhe; Wang, Xuejun; Wang, Shengqi	Inhibitory effect on SARS-CoV-2 infection of neferine by blocking Ca2+-dependent membrane fusion	Journal of Medical Virology		0146-6615	10.1002/jmv.27117		The coronavirus disease 2019 (COVID-19) pandemic has focused attention on the need to develop effective therapeutics against the causative pathogen, severe acute respiratory syndrome coronavirus 2 (SARS-CoV-2), and also against other pathogenic coronaviruses. In this study, we report on a kind of bisbenzylisoquinoline alkaloid, neferine, as a pan-coronavirus entry inhibitor. Neferine effectively …	Oct-21	2022/9/20 10:55	2022/9/20 10:55		5825-5832		10	93		J. Med. Virol.								English							Place: Hoboken Publisher: Wiley WOS:000659244600001				SARS-CoV-2; vaccine; determinants; spike protein; Ca2+-dependency; cov; entry; entry inhibitor; functional receptor; host; membrane fusion; neferine; virus
A6ER5P73	journalArticle	2021	Pastorino, Roberta; Villani, Leonardo; La Milia, Daniele Ignazio; Ieraci, Roberto; Chini, Francesco; Volpe, Enrico; Barca, Alessandra; Fusco, Danilo; Laurenti, Patrizia; Ricciardi, Walter; Boccia, Stefania	Influenza and pneumococcal vaccinations are not associated to COVID-19 outcomes among patients admitted to a university hospital	Vaccine		0264-410X	10.1016/j.vaccine.2021.05.015		In order to reduce the burden on healthcare systems and to support differential diagnosis with COVID-19, influenza and pneumococcal vaccinations were strongly recommended during the COVID-19 pandemic, especially in vulnerable groups. However, no univocal and conclusive evidence on the relationship between influenza and pneumococcal vaccinations and COVID-19 outcomes exists. We evaluated the assoc…	2021/6/11	2022/9/20 10:55	2022/9/20 10:55		3493-3497		26	39		Vaccine								English							Place: Oxford Publisher: Elsevier Sci Ltd WOS:000658397000007				covid-19; impact; bcg vaccination; Flu vaccination; Health outcomes; Pneumococcal vaccination; reduce; seasonal influenza
LT6BW4VS	journalArticle	2021	Ackerson, Bradley K.; Sy, Lina S.; Glenn, Sungching C.; Qian, Lei; Park, Claire H.; Riewerts, Robert J.; Jacobsen, Steven J.	Pediatric Vaccination During the COVID-19 Pandemic	Pediatrics		0031-4005	10.1542/peds.2020-047092		OBJECTIVES The impact of the coronavirus disease 2019 pandemic on vaccination coverage, critical to preventing vaccine-preventable diseases, has not been assessed during the reopening period. METHODS Vaccine uptake and vaccination coverage for recommended vaccines and for measles-containing vaccines at milestone ages were assessed in a large cohort of children aged 0 to 18 years in Southern Calif…	Jul-21	2022/9/20 10:55	2022/9/20 10:55		e2020047092		1	148		Pediatrics								English							Place: Elk Grove Village Publisher: Amer Acad Pediatrics WOS:000677676000026				united-states; measles; coverage; decline
H45K8WZJ	journalArticle	2021	Curtis, Jeffrey R.; Johnson, Sindhu R.; Anthony, Donald D.; Arasaratnam, Reuben J.; Baden, Lindsey R.; Bass, Anne R.; Calabrese, Cassandra; Gravallese, Ellen M.; Harpaz, Rafael; Kroger, Andrew; Sadun, Rebecca E.; Turner, Amy S.; Williams, Eleanor Anderson; Mikuls, Ted R.	American College of Rheumatology Guidance for COVID-19 Vaccination in Patients With Rheumatic and Musculoskeletal Diseases: Version 3	Arthritis & Rheumatology		2326-5191	10.1002/art.41928		Objective To provide guidance to rheumatology providers on the use of coronavirus disease 2019 (COVID-19) vaccines for patients with rheumatic and musculoskeletal diseases (RMDs). Methods A task force was assembled that included 9 rheumatologists/immunologists, 2 infectious disease specialists, and 2 public health physicians. After agreeing on scoping questions, an evidence report was created tha…	Oct-21	2022/9/20 10:55	2022/9/20 10:55		E60-E75		10	73		Arthritis Rheumatol.								English							Place: Hoboken Publisher: Wiley WOS:000680820100001				influenza vaccine; a/h1n1 vaccination; antibody-response; herpes-zoster; humoral immune-response; methotrexate discontinuation; modifying antirheumatic drugs; randomized controlled-trial; systemic-lupus-erythematosus; transplant recipients
YFE9ZGK6	journalArticle	2021	Lee, Hyuk-Chae; Jeong, Sol; Cho, Andrew Y.; Kim, Kyu-Jik; Kim, Jun-Young; Park, Dam-Hee; Kim, Hyun-Jin; Kwon, Jung-Hoon; Song, Chang-Seon	Genomic Analysis of Avian Infectious Bronchitis Viruses Recently Isolated in South Korea Reveals Multiple Introductions of GI-19 Lineage (QX Genotype)	Viruses-Basel			10.3390/v13061045		Infectious bronchitis virus (IBV) was first identified in the 1930s and it imposes a major economic burden on the poultry industry. In particular, GI-19 lineage has spread globally and has evolved constantly since it was first detected in China. In this study, we analyzed S1 gene sequences from 60 IBVs isolated in South Korea. Two IBV lineages, GI-15 and GI-19, were identified in South Korea. Phy…	Jun-21	2022/9/20 10:55	2022/9/20 10:55		1045		6	13		Viruses-Basel								English							Place: Basel Publisher: Mdpi WOS:000666480500001				vaccine; avian coronavirus; coronaviruses; genetic diversity; ibv; multiple introductions; phylogenetic analysis; phylogenetic inference; poultry; South Korea; surveillance
I83Z425Q	journalArticle	2021	Liu, Jinxuan; Xu, Jian; Wu, Zhicai; Cheng, Yuru; Gou, Yuxin; Ridolfo, Jesse	Soundscape Preference of Urban Residents in China in the Post-pandemic Era	Frontiers in Psychology		1664-1078	10.3389/fpsyg.2021.750421		This research aims to explore the reality of the soundscape preferences of Chinese urban residents in general public landscape in the post-pandemic era, and then to propose design recommendations to meet the practical needs of people's preferences for landscape-especially soundscapes-in the post-pandemic era. In this study, we utilized the subjective evaluation method to conduct an online questio…	2021/12/22	2022/9/20 10:55	2022/9/20 10:55		750421			12		Front. Psychol.								English							Place: Lausanne Publisher: Frontiers Media Sa WOS:000742039900001				covid-19; China urban; music; post-pandemic era; public landscape; soundscape preference; spaces; survey
LLCUK2U9	journalArticle	2021	Feldman, Sarah; Haas, Jennifer S.	How the Coronavirus Disease-2019 May Improve Care: Rethinking Cervical Cancer Prevention	Jnci-Journal of the National Cancer Institute		0027-8874	10.1093/jnci/djaa089		These past months of the coronavirus disease-2019 (COVID-2019) pandemic have given us ample opportunity to reflect on the US health-care system. Despite overwhelming tragedy, it is an opportunity for us to learn and to change. As we postpone routine visits because of the pandemic, we worry about risks for patients who delay cancer screening. We use cervical cancer screening and prevention as an e…	Jun-21	2022/9/20 10:55	2022/9/20 10:55		662-664		6	113		JNCI-J. Natl. Cancer Inst.								English							Place: Cary Publisher: Oxford Univ Press Inc WOS:000734337200009
QIZRI3IJ	journalArticle	2021	Kuhn, Randall; Henwood, Benjamin; Lawton, Alexander; Kleva, Mary; Murali, Karthik; King, Coley; Gelberg, Lillian	COVID-19 vaccine access and attitudes among people experiencing homelessness from pilot mobile phone survey in Los Angeles, CA	Plos One		1932-6203	10.1371/journal.pone.0255246		People experiencing homelessness (PEH) are at high risk for COVID-19 complications and fatality, and have been prioritized for vaccination in many areas. Yet little is known about vaccine acceptance in this population. The objective of this study was to determine the level of vaccine hesitancy among PEH in Los Angeles, CA and to understand the covariates of hesitancy in relation to COVID-19 risk,…	2021/7/30	2022/9/20 10:55	2022/9/20 10:55		e0255246		7	16		PLoS One								English							Place: San Francisco Publisher: Public Library Science WOS:000685248600031				health
BYHSJDBK	journalArticle		Noe, Sebastian; Ochana, Nino; Wiese, Carmen; Schabaz, Farhad; Von Krosigk, Ariane; Heldwein, Silke; Rasshofer, Rudolf; Wolf, Eva; Jonsson-Oldenbuettel, Celia	Humoral response to SARS-CoV-2 vaccines in people living with HIV	Infection		0300-8126	10.1007/s15010-021-01721-7		Purpose To describe the humoral immune response to COVID-19 vaccines in people living with HIV and identify factors associated with the magnitude of anti-SARS-CoV-2 antibody concentrations. Methods Retrospective analysis of electronic patient files in a big single HIV center in Munich, Germany. Non-parametric methods were used for descriptive and comparative statistics. Generalized linear models …		2022/9/20 10:55	2022/9/20 10:55							Infection								English							Place: Heidelberg Publisher: Springer Heidelberg WOS:000710874100001				covid-19; SARS-CoV-2; infection; cd4; COVID-19 vaccines; hiv
686BBV97	journalArticle	2021	Shankar, Mythri; Narasimhappa, Shashikala; MuddeGowda, Mythri Kuthagale; Siddappa, Madhura Navule; Ramprasad, Kowsalya; Lingaraj, Umesha	Coronavirus Disease 2019 and Chronic Kidney Disease - A Clinical Observational Study	Saudi Journal of Kidney Diseases and Transplantation		1319-2442	10.4103/1319-2442.336770		People with comorbidities are more prone to severe coronavirus disease 19 (COVID-19) infection. Chronic kidney disease (CKD) patients are commonly associated with other comorbidities such as diabetes mellitus, hypertension, or cardiovascular disease. However, there are limited data about the clinical features and laboratory parameters of COVID-19 in CKD patients. The primary objective was to stud…	Jun-21	2022/9/20 10:55	2022/9/20 10:55		744-753		3	32		Saudi J. Kidney Dis. Transplant.								English							Place: Mumbai Publisher: Wolters Kluwer Medknow Publications WOS:000756186400015				covid-19; inflammation; infection
AICLLD6R	journalArticle	2021	Sim, Marcus; Cockcroft, Christopher; Darby, Denise; Ellis, Clare R.; Heaps, Adrian; Scargill, Jonathan; Garcez, Tomaz	Paired sensitivity analysis of four SARS-CoV-2 serological immunoassays in a longitudinal cohort of convalescent hospital staff	Annals of Clinical Biochemistry		0004-5632	10.1177/00045632211030957		Background SARS-CoV-2 serological testing has seen extensive academic and clinical use from investigating correlates of immunity to seroprevalence, convalescent plasma and vaccine trials. Interpretation of these studies will depend on robust validation of the longitudinal sensitivities of these assays, especially in the context of mild disease which makes up the majority of the Coronavirus Diseas…	Nov-21	2022/9/20 10:55	2022/9/20 10:55		646-649		6	58		Ann. Clin. Biochem.								English							Place: Thousand Oaks Publisher: Sage Publications Inc WOS:000675702400001				sensitivity; Coronavirus disease 2019; hospital staff; immunoassay; longitudinal cohort; quality assurance and control; serology
L6XPBNJK	journalArticle	2021	McFadden, Kathleen; Heywood, Anita; Dyda, Amalie; Kaufman, Jessica; Seale, Holly	Minimising missed opportunities to promote and deliver immunization services to middle and older age adults: Can hospital-based programs be a solution?	Vaccine		0264-410X	10.1016/j.vaccine.2021.05.027		Background: There has been a recent recognized shift towards a whole-of-life or life-course approach to immunisation. However, coverage amongst at-risk adults for recommended vaccines continues to be sub -optimal. This study examined the perceptions of middle and older aged Australian adults towards hospital-based immunization programs and their previous exposures to receiving vaccines via tertia…	2021/6/11	2022/9/20 10:55	2022/9/20 10:55		3467-3472		26	39		Vaccine								English							Place: Oxford Publisher: Elsevier Sci Ltd WOS:000658397000003				Immunization; Vaccination; quality improvement; Influenza; coverage; Acceptance; Adults; australia; elderly-people; Hesitancy; Hospital; influenza vaccination rates; Pneumococcal; pneumococcal vaccination; reminders; standing orders
VK8XYZHF	journalArticle	2021	Shi, Yuejun; Shi, Jiale; Sun, Limeng; Tan, Yubei; Wang, Gang; Guo, Fenglin; Hu, Guangli; Fu, Yanan; Fu, Zhen F.; Xiao, Shaobo; Peng, Guiqing	Insight into Vaccine Development for Alphacoronaviruses Based on Structural and Immunological Analyses of Spike Proteins	Journal of Virology		0022-538X	10.1128/JVI.02284-20		Coronaviruses that infect humans belong to the Alphacoronavirus (including HCoV-229E) and Betacoronavirus (including SARS-CoV and SARS-CoV-2) genera. In particular, SARS-CoV-2 is currently a major threat to public health worldwide. The spike (S) homotrimers bind to their receptors via the receptor-binding domain (RBD), which is a major target to block viral entry. In this study, we selected Alpha…	Apr-21	2022/9/20 10:55	2022/9/20 10:55		e02284-20		7	95		J. Virol.								English							Place: Washington Publisher: Amer Soc Microbiology WOS:000632680600003				coronavirus; spike protein; neutralizing antibody; crystal-structure; mers-cov; protective immunity; receptor-binding domain; reveals; sars-cov; structural analysis
CBJVW4QN	journalArticle	2021	Afifi, Tracie O.; Salmon, Samantha; Taillieu, Tamara; Stewart-Tufescu, Ashley; Fortier, Janique; Driedger, S. Michelle	Older adolescents and young adults willingness to receive the COVID-19 vaccine: Implications for informing public health strategies	Vaccine		0264-410X	10.1016/j.vaccine.2021.05.026		Importance: The success in ending the COVID-19 pandemic rests partly on the mass uptake of the COVID-19 vaccine. Little work has been done to understand vaccine willingness among older adolescents and young adults. This is important since this age group may be less likely to adhere to public health guide-lines. Objective: To understand willingness of getting a vaccine and reasons for vaccine hesi…	2021/6/11	2022/9/20 10:55	2022/9/20 10:55		3473-3479		26	39		Vaccine								English							Place: Oxford Publisher: Elsevier Sci Ltd WOS:000658397000004				covid-19; Public health; Adolescents; Vaccine hesitancy; abuse; adverse childhood experiences; care utilization; parents; Young adults
AGZGI6GS	journalArticle	2022	Maniscalco, Giorgia Teresa; Manzo, Valentino; Ferrara, Anne Lise; Perrella, Alessandro; Di Battista, Mariaelena; Salvatore, Simona; Graziano, Daniela; Viola, Assunta; Amato, Gerardino; Moreggia, Ornella; Cesare, Daniele Di Giulio; Barbato, Stefano; Servillo, Giovanna; Longo, Katia; Di Giovanni, Mario; Scarpati, Barbara; Muggianu, Simona Maria; Longo, Giuseppe; Russo, Giuseppe; Andreone, Vincenzo;…	Interferon Beta-1a treatment promotes SARS-CoV-2 mRNA vaccine response in multiple sclerosis subjects	Multiple Sclerosis and Related Disorders		2211-0348	10.1016/j.msard.2021.103455		Background: Several concerns exist on the immunogenicity of SARS-CoV-2 vaccines in multiple sclerosis (MS) subjects due to their immunomodulating disease modifying therapies (DMTs). Here we report a comparison of the humoral response to BNT162b2-mRNA coronavirus (COVID)-19 vaccine and the immunological phenotype in a cohort of 125 MS subjects undergoing different DMTs, with no history of SARS-CoV…	Feb-22	2022/9/20 10:55	2022/9/20 10:55		103455			58		Mult. Scler. Relat. Disord.								English							Place: Oxford Publisher: Elsevier Sci Ltd WOS:000734438900006				BNT162b2-mRNA coronavirus-19 vaccine; Disease modifying therapies; Humoral response; Multiple sclerosis; SARS-CoV-2 spike protein
BJ8B8SNC	journalArticle	2021	Walach, Harald; Ruof, Viviane; Hellweg, Raffaele	Opinion of German Immunologists on SARS-CoV- 2: Results of an Online Survey	Cureus			10.7759/cureus.19393		Background Little is known about the opinion of professional academic immunologists regarding the severe acute respiratory syndrome coronavirus 2 (SARS-CoV-2) pandemic. Methodology In this study, we designed an online survey to determine the opinion of immunologically competent academics on SARS-CoV-2 compared with seasonal flu (the infection fatality rate, infectivity, the challenge to the healt…	2021/11/9	2022/9/20 10:55	2022/9/20 10:55		e19393		11	13		Cureus								English							Place: Palo Alto Publisher: Cureus Inc WOS:000718988800018				responses; host; covid-19 vaccination; host factors; immune system; immunology covid-19; innate immune system; primary survey; scale validation
NKHLTUKZ	journalArticle	2021	Tan, Joshua T. C.; Tan, Clive; Teoh, Jeremy; Wahab, M. T.; Tan, Guan Zhong; Chin, Reon Yew Zhou; Lee, Anne; Mutalib, Adeliza; Lim, Poh Lian	Adverse reactions and safety profile of the mRNA COVID-19 vaccines among Asian military personnel	Annals Academy of Medicine Singapore		0304-4602	10.47102/annals-acadmedsg.2021345		Introduction: The use of novel mRNA platforms for COVID-19 vaccines raised concern about vaccine safety, especially in Asian populations that made up less than 10% of study populations in the pivotal vaccine trials used for emergency use authorisation. Vaccine safety issues also remain a concern in assessing the clinical risks and benefits of vaccine boosters, particularly in specific age groups …	Nov-21	2022/9/20 10:55	2022/9/20 10:55		2021345		11	50		Ann. Acad. Med. Singap.								English							Place: Republic Singapore Publisher: Acad Medicine Singapore WOS:000734398600001				covid-19; vaccine; public health; impact; knowledge; health; mRNA vaccine; singapore; vaccine safety
BEHII888	journalArticle	2022	Krug, Allison; Appleby, Richard; Pizzini, Robert; Hoeg, Tracy Beth	Youth ice hockey COVID-19 protocols and prevention of sport-related transmission	British Journal of Sports Medicine		0306-3674	10.1136/bjsports-2021-104363		Objectives This observational study evaluated the impact of return-to-play protocols to prevent transmission of SARS-CoV-2 in a youth ice hockey programme in Virginia Beach, Virginia. Methods Following an outbreak of SARS-CoV-2 in November 2020, a COVID-19 Response Team evaluated the epidemiological data to identify transmission dynamics and develop enhanced protocols to prevent transmission. Dur…	Jan-22	2022/9/20 10:55	2022/9/20 10:55		29-34		1	56		Br. J. Sports Med.								English							Place: London Publisher: Bmj Publishing Group WOS:000723310000001				covid-19; public health; infection; florida; ice hockey; indoor
LWS7XRVR	journalArticle	2021	Granata, Vincenza; Fusco, Roberta; Setola, Sergio Venanzio; Galdiero, Roberta; Picone, Carmine; Izzo, Francesco; D'Aniello, Roberta; Miele, Vittorio; Grassi, Roberta; Grassi, Roberto; Petrillo, Antonella	Lymphadenopathy after BNT162b2 Covid-19 Vaccine: Preliminary Ultrasound Findings	Biology-Basel			10.3390/biology10030214		Simple Summary Eccentric cortical thickening with wide echogenic hilum and oval shape, asymmetric eccentric cortical thickening with wide echogenic hilum and oval shape, concentric cortical thickening with reduction in the width of the echogenic hilum and oval shape, and huge reduction and displacement of the echogenic hilum and round shape are the features that we found in post BNT162b2 Covid-19…	Mar-21	2022/9/20 10:55	2022/9/20 10:55		214		3	10		Biology-Basel								English							Place: Basel Publisher: Mdpi WOS:000633324700001				vaccine; COVID-19 infection; lymphadenopathy; ultrasound
JHHA5BWU	journalArticle	2021	Zhao, Jing; Sun, Lu; Zhao, Ye; Feng, Delan; Cheng, Jinlong; Zhang, Guozhong	Coronavirus Endoribonuclease Ensures Efficient Viral Replication and Prevents Protein Kinase R Activation	Journal of Virology		0022-538X	10.1128/JVI.02103-20		Coronavirus (CoV) nsp15 is an endoribonuclease conserved throughout the CoV family. The enzymatic activity and crystal structure of infectious bronchitis virus (IBV) nsp15 are undefined, and the protein's role in replication remains unclear. We verified the uridylate-specific endoribonuclease (EndoU) activity of IBV and found that the EndoU active sites were located in the C terminus of nsp15 and…	Apr-21	2022/9/20 10:55	2022/9/20 10:55		e02103-20		7	95		J. Virol.								English							Place: Washington Publisher: Amer Soc Microbiology WOS:000632680600009				gamma-coronavirus; infectious bronchitis virus; nonstructural protein 15 (nsp15); protein kinase R; uridylate-specific endoribonuclease (EndoU)
FKLHBMJ3	journalArticle	2021	Leineweber, Fabius Vieira; Zepeda Bermudez, Jorge Antonio	The influence of the US response to COVID-19 in Global Health	Ciencia & Saude Coletiva		1413-8123	10.1590/1413-81232021263.38042020		The American response to the pandemic involves a prominent volume of federal resources, especially for developing and acquiring products for internal use, such as diagnostics or vaccines. Investment mechanisms and historical aspects justify this expenditure. Thus, the social construction of nationalism in American society hinders access to health technologies. The review of such aspects shows how…	Mar-21	2022/9/20 10:55	2022/9/20 10:55		1001-1012		3	26		Cienc. Saude Coletiva								English							Place: Rio De Janeiro Publisher: Abrasco-Assoc Brasileira Pos-Graduacao & Saude Coletiva WOS:000629018900021				covid-19; vaccines; Access to Technological Innovation; Government Agencies; Health Sciences; Technology, and Innovation Management
CZBRJE2Z	journalArticle	2021	Bose, Tungadri; Pant, Namrata; Pinna, Nishal Kumar; Bhar, Subhrajit; Dutta, Anirban; Mande, Sharmila S.	Does immune recognition of SARS-CoV2 epitopes vary between different ethnic groups?	Virus Research		0168-1702	10.1016/j.virusres.2021.198579		The SARS-CoV2 mediated Covid-19 pandemic has impacted humankind at an unprecedented scale. While substantial research efforts have focused towards understanding the mechanisms of viral infection and developing vaccines/ therapeutics, factors affecting the susceptibility to SARS-CoV2 infection and manifestation of Covid-19 remain less explored. Given that the Human Leukocyte Antigen (HLA) system i…	Nov-21	2022/9/20 10:55	2022/9/20 10:55		198579			305		Virus Res.								English							Place: Amsterdam Publisher: Elsevier WOS:000706007200008				disease; SARS-CoV2; prediction; antigen presentation; Epitope; Ethnic variations; HLA system; Immune response; MHC alleles
Q3QTLRXI	journalArticle	2021	Eberle, Raphael J.; Olivier, Danilo S.; Amaral, Marcos S.; Gering, Ian; Willbold, Dieter; Arni, Raghuvir K.; Coronado, Monika A.	The Repurposed Drugs Suramin and Quinacrine Cooperatively Inhibit SARS-CoV-2 3CL(pro) In Vitro	Viruses-Basel			10.3390/v13050873		Since the first report of a new pneumonia disease in December 2019 (Wuhan, China) the WHO reported more than 148 million confirmed cases and 3.1 million losses globally up to now. The causative agent of COVID-19 (SARS-CoV-2) has spread worldwide, resulting in a pandemic of unprecedented magnitude. To date, several clinically safe and efficient vaccines (e.g., Pfizer-BioNTech, Moderna, Johnson & J…	May-21	2022/9/20 10:55	2022/9/20 10:55		873		5	13		Viruses-Basel								English							Place: Basel Publisher: Mdpi WOS:000654617600001				model; covid-19; SARS-CoV-2; 3cl protease inhibitors; 3CL(pro); assay; main protease; malaria; quinacrine; repurposing approved drugs; suramin
32PMCMF8	journalArticle	2021	Bonet-Esteve, Anna; Munoz-Miralles, Raquel; Gonzalez-Claramunt, Carla; Rufas, Ana M.; Cruz, Xavier Pelegrin; Vidal-Alaball, Josep	Influenza vaccination during the coronavirus pandemic: intention to vaccinate among the at-risk population in the Central Catalonia Health Region (VAGCOVID)	Bmc Family Practice			10.1186/s12875-021-01434-8		Background Influenza is a major public health issue, with the primary preventive measure being an annual influenza vaccination. Nevertheless, vaccination coverage among the at-risk population is low. Our understanding of the behaviour of the influenza virus during the SARS-CoV-2 coronavirus pandemic is limited, meaning influenza vaccination is still recommended for individuals at risk for severe …	2021/5/1	2022/9/20 10:55	2022/9/20 10:55		84		1	22		BMC Fam. Pract.								English							Place: London Publisher: Bmc WOS:000647629700001				covid-19; Attitudes; Health Knowledge; Human influenza; Influenza vaccines; Intention; Practice; Vaccination coverage; Vaccination refusal
TQIDC6TU	journalArticle	2021	Lee, Haewon; Punt, Jennifer A.; Miller, David C.; Nagpal, Ameet; Smith, Clark C.; Sayeed, Yusef; Patel, Jaymin; Stojanovic, Milan P.; Popescu, Adrian; McCormick, Zachary L.	Do Corticosteroid Injections for the Treatment of Pain Influence the Efficacy of mRNA COVID-19 Vaccines?	Pain Medicine		1526-2375	10.1093/pm/pnab063		Myth: Corticosteroid injection for the treatment of pain and inflammation is known to decrease the efficacy of the messenger ribonucleic acid (mRNA) vaccines for coronavirus disease 2019 (COVID-19). Fact: There is currently no direct evidence to suggest that a corticosteroid injection before or after the administration of an mRNA COVID-19 vaccine decreases the efficacy of the vaccine. However, ba…	Apr-21	2022/9/20 10:55	2022/9/20 10:55		994-1000		4	22		Pain Med.								English							Place: Oxford Publisher: Oxford Univ Press WOS:000649350700022				responses; vaccination; knee; pituitary-adrenal axis
ZXRW6T8C	journalArticle	2021	Oyebode, Oladapo; Ndulue, Chinenye; Adib, Ashfaq; Mulchandani, Dinesh; Suruliraj, Banuchitra; Orji, Fidelia Anulika; Chambers, Christine T.; Meier, Sandra; Orji, Rita	Health, Psychosocial, and Social Issues Emanating From the COVID-19 Pandemic Based on Social Media Comments: Text Mining and Thematic Analysis Approach	Jmir Medical Informatics			10.2196/22734		Background: The COVID-19 pandemic has caused a global health crisis that affects many aspects of human lives. In the absence of vaccines and antivirals, several behavioral change and policy initiatives such as physical distancing have been implemented to control the spread of COVID-19. Social media data can reveal public perceptions toward how governments and health agencies worldwide are handlin…	Apr-21	2022/9/20 10:55	2022/9/20 10:55		e22734		4	9		JMIR Med. Inf.								English							Place: Toronto Publisher: Jmir Publications, Inc WOS:000646051700010				covid-19; coronavirus; health issues; infodemiology; infoveillance; interventions; natural language processing; psychosocial issues; social issues; social media; text mining; thematic analysis
P8XRQMAE	journalArticle	2021	Malik, Hira Ahmed; Faraz, Aisha; Bhatty, Afreen; Mumtaz, Tayyaba; Zafar, Urooj; Khurram, Samreen	Prevalence of Adverse Reactions to Different COVID-19 Vaccinations among Karachi Residents	Journal of Pharmaceutical Research International		2456-9119	10.9734/JPRI/2021/v33i47A33023		Background: Coronavirus disease 2019 (COVID-19) pandemic emerged in Karachi and rapidly spread throughout Pakistan Since February 26, 2020. Objectives: Vaccination is currently one of the most effective COVID-19 eradication approach. The purpose of this study was to gather data on the adverse effects of the COVID-19 vaccine. Methodology: It was an observational study that was carried out between …	2021	2022/9/20 10:55	2022/9/20 10:55		379-386		47A	33		J. Pharm. Res. Int.								English							Place: Gurgaon Publisher: Sciencedomain Int WOS:000714741700040				Covid-19; astrazeneca; cansino; covax; Covid-19 vaccination; pakvac; sinopharm; sinovac; sputnik; vaccination adverse effects
8Z8NI94H	journalArticle	2021	Pan, Ting; Chen, Ran; He, Xin; Yuan, Yaochang; Deng, Xiaohui; Li, Rong; Yan, Haiping; Yan, Shumei; Liu, Jun; Zhang, Yiwen; Zhang, Xiantao; Yu, Fei; Zhou, Mo; Ke, Changwen; Ma, Xiancai; Zhang, Hui	Infection of wild-type mice by SARS-CoV-2 B.1.351 variant indicates a possible novel cross-species transmission route	Signal Transduction and Targeted Therapy		2095-9907	10.1038/s41392-021-00848-1		COVID-19 is identified as a zoonotic disease caused by SARS-CoV-2, which also can cross-transmit to many animals but not mice. Genetic modifications of SARS-CoV-2 or mice enable the mice susceptible to viral infection. Although neither is the natural situation, they are currently utilized to establish mouse infection models. Here we report a direct contact transmission of SARS-CoV-2 variant B.1.3…	2021/12/14	2022/9/20 10:55	2022/9/20 10:55		420		1	6		Signal Transduct. Target. Ther.								English							Place: London Publisher: Springernature WOS:000730200800001				ace2; receptor-binding domain; deer; replication
TXLDH9XC	journalArticle	2021	Yu, Zhuo; Wang, Gang; Goldman, Emanuel; Zangerl, Barbara; Xie, Ning; Cao, Yanhong; Chen, Jingyu; Day, Sara W.; Howard, Scott C.; Maida, Marcello; Ray, Kunal; Jablonski, Monica M.; Ji, Jiafu; Postlethwaite, Arnold; Gu, Weikuan; Sun, Dianjun; Aleya, Lotfi	COVID-19 vaccine: Call for employees in international transportation industries and international travelers as the first priority in global distribution	Open Medicine		2391-5463	10.1515/med-2021-0210		While countries are in a hurry to obtain SARS-CoV-2 vaccine, we are concerned with the availability of vaccine and whether a vaccine will be available to all in need. We predicted three possible scenarios for vaccine distributions and urge an international united action on the worldwide equitable access. In case the international community does not reach a consensus on how to distribute the vacci…	2021	2022/9/20 10:55	2022/9/20 10:55		134-138		1	16		Open Med.								English							Place: Warsaw Publisher: De Gruyter Poland Sp Z O O WOS:000609216700001				covid-19; vaccine; international transportation; international collaboration; priority
95F2RTRX	journalArticle	2021	Surina, Sanita; Martinsone, Kristine; Perepjolkina, Viktorija; Kolesnikova, Jelena; Vainik, Uku; Ruza, Aleksejs; Vrublevska, Jelena; Smirnova, Daria; Fountoulakis, Konstantinos N.; Rancans, Elmars	Factors Related to COVID-19 Preventive Behaviors: A Structural Equation Model	Frontiers in Psychology		1664-1078	10.3389/fpsyg.2021.676521		Background: While COVID-19 has rapidly spread around the world, and vaccines are not widely available to the general population, the World Health Organization outlines preventive behavior as the most effective way to limit the rapid spread of the virus. Preventive behavior is associated with a number of factors that both encourage and discourage prevention. Aim: The aim of this research was to st…	2021/7/5	2022/9/20 10:55	2022/9/20 10:55		676521			12		Front. Psychol.								English							Place: Lausanne Publisher: Frontiers Media Sa WOS:000674377000001				covid-19; trust; anxiety; conspiracy beliefs; fear; preventive behavior; protection motivation theory; threat; threat appraisals; trust in information sources
WX8882VI	journalArticle	2021	Hod, Tammy; Ben-David, Aharon; Olmer, Liraz; Levy, Itzchak; Ghinea, Ronen; Mor, Eytan; Lustig, Yaniv; Rahav, Galia	Humoral Response of Renal Transplant Recipients to the BNT162b2 SARS-CoV-2 mRNA Vaccine Using Both RBD IgG and Neutralizing Antibodies	Transplantation		0041-1337	10.1097/TP.0000000000003889		Background. Data about SARS-CoV-2 vaccines efficacy in renal transplant recipients (RTR) are lacking. Methods. To reveal predictors for humoral response to BNT162b2 vaccine among RTR, patients were divided into positive (N = 42) and negative (N = 78) response groups based on receptor-binding domain (RBD) immunoglobulin G (IgG) >= 1.1 and neutralizing antibodies (NA) >= 16 dilution versus RBD IgG …	Nov-21	2022/9/20 10:55	2022/9/20 10:55		E234-E243		11	105		Transplantation								English							Place: Philadelphia Publisher: Lippincott Williams & Wilkins WOS:000711141800009				covid-19; influenza vaccination; immunization; safety; immunogenicity; immune-response; liver; mycophenolic-acid
KN5F4DP5	journalArticle	2021	Haskin, Orly; Ashkenazi-Hoffnung, Liat; Ziv, Noa; Borovitz, Yael; Dagan, Amit; Levi, Shelly; Koren, Gili; Hamdani, Gilad; Levi-Erez, Daniella; Landau, Daniel; Alfandary, Hadas	Serological Response to the BNT162b2 COVID-19 mRNA Vaccine in Adolescent and Young Adult Kidney Transplant Recipients	Transplantation		0041-1337	10.1097/TP.0000000000003922		Background. Initial reports in adult kidney transplant recipients (KTR) indicate low immunogenicity after 2 doses of the BNT162b2 COVID-19 mRNA vaccine. We describe the immunogenicity of this vaccine compared to the serologic response in naturally infected COVID-19 positive adolescent and young adult KTR. Methods. For this prospective observational study, the study group included 38 KTR who recei…	Nov-21	2022/9/20 10:55	2022/9/20 10:55		E226-E233		11	105		Transplantation								English							Place: Philadelphia Publisher: Lippincott Williams & Wilkins WOS:000711141800008
VJ3JUDER	journalArticle	2021	Du, Zhanwei; Pandey, Abhishek; Bai, Yuan; Fitzpatrick, Meagan C.; Chinazzi, Matteo; Pastore y Piontti, Ana; Lachmann, Michael; Vespignani, Alessandro; Cowling, Benjamin J.; Galvani, Alison P.; Meyers, Lauren Ancel	Comparative cost-effectiveness of SARS-CoV-2 testing strategies in the USA: a modelling study	Lancet Public Health		2468-2667	10.1016/S2468-2667(21)00002-5		Background To mitigate the COVID-19 pandemic, countries worldwide have enacted unprecedented movement restrictions, physical distancing measures, and face mask requirements. Until safe and efficacious vaccines or antiviral drugs become widely available, viral testing remains the primary mitigation measure for rapid identification and isolation of infected individuals. We aimed to assess the econo…	Mar-21	2022/9/20 10:55	2022/9/20 10:55		E184-E191		3	6		Lancet Public Health								English							Place: Oxford Publisher: Elsevier Sci Ltd WOS:000624898000011
PCFN4L7W	journalArticle	2021	Taye, Birhan Tsegaw; Amogne, Fetene Kasahun; Demisse, Tesfanesh Lemma; Zerihun, Mulualem Silesh; Kitaw, Tebabere Moltot; Tiguh, Agumas Eskezia; Mihret, Muhabaw Shumye; Kebede, Azmeraw Ambachew	Coronavirus disease 2019 vaccine acceptance and perceived barriers among university students in northeast Ethiopia: A cross-sectional study	Clinical Epidemiology and Global Health		2452-0918	10.1016/j.cegh.2021.100848		Background: Universities are places where students live and study in close contact to each other. Nowadays, the foundations of this particular group have been affected significantly by the rapid spread of the coronavirus disease 2019. The severity of the COVID-19 pandemic has demanded the emergency use of COVID-19 vaccines. However, there is still limited evidence in COVID-19 vaccine acceptabilit…	Dec-21	2022/9/20 10:55	2022/9/20 10:55		100848			12		Clin. Epidemiol. Glob. Health								English							Place: New Delhi Publisher: Elsevier - Division Reed Elsevier India Pvt Ltd WOS:000704764700026				united-states; COVID-19 vaccine; hesitancy; covid-19 vaccine; intention; adults; Acceptance; Ethiopia; Perceived barriers; University students
Y847JMXZ	journalArticle	2021	Arturo Molina-Mora, Jose; Cordero-Laurent, Estela; Godinez, Adriana; Calderon-Osorno, Melany; Brenes, Hebleen; Soto-Garita, Claudio; Perez-Corrales, Cristian; Felix Drexler, Jan; Moreira-Soto, Andres; Corrales-Aguilar, Eugenia; Duarte-Martinez, Francisco	SARS-CoV-2 genomic surveillance in Costa Rica: Evidence of a divergent population and an increased detection of a spike T1117I mutation	Infection Genetics and Evolution		1567-1348	10.1016/j.meegid.2021.104872		Genome sequencing is a key strategy in the surveillance of SARS-CoV-2, the virus responsible for the COVID-19 pandemic. Latin America is the hardest-hit region of the world, accumulating almost 20% of COVID-19 cases worldwide. In Costa Rica, from the first detected case on March 6th to December 31st almost 170,000 cases have been reported. We analyzed the genomic variability during the SARS-CoV-2…	Aug-21	2022/9/20 10:55	2022/9/20 10:55		104872			92		Infect. Genet. Evol.								English							Place: Amsterdam Publisher: Elsevier WOS:000733833000010				covid-19; SARS-CoV-2; alignment; protein; Pandemic; program; Costa Rica; Genomic surveillance
BQG4K6YR	journalArticle	2021	Inglis, Timothy J. J.; McFadden, Benjamin; Macali, Anthony	Estimating COVID Risk During a Period of Pandemic Decline	Frontiers in Public Health			10.3389/fpubh.2021.744819		Background: Many parts of the world that succeeded in suppressing epidemic coronavirus spread in 2020 have been caught out by recent changes in the transmission dynamics of SARS-CoV-2. Australia's early success in suppressing COVID-19 resulted in lengthy periods without community transmission. However, a slow vaccine rollout leaves this geographically isolated population vulnerable to leakage of …	2021/12/17	2022/9/20 10:55	2022/9/20 10:55		744819			9		Front. Public Health								English							Place: Lausanne Publisher: Frontiers Media Sa WOS:000738817000001				covid-19; SARS-CoV-2; community transmission; delta variant; epidemic risk; health intelligence; health threat assessment
8G37A882	journalArticle	2021	Kiesslich, Sascha; Kim, Gyoung N.; Shen, Chun F.; Kang, C. Yong; Kamen, Amine A.	Bioreactor production of rVSV-based vectors in Vero cell suspension cultures	Biotechnology and Bioengineering		0006-3592	10.1002/bit.27785		The Vero cell line is the most used continuous cell line in viral vaccine manufacturing. This adherent cell culture platform requires the use of surfaces to support cell growth, typically roller bottles, or microcarriers. We have recently compared the production of rVSV-ZEBOV on Vero cells between microcarrier and fixed-bed bioreactors. However, suspension cultures are considered superior with re…	Jul-21	2022/9/20 10:55	2022/9/20 10:55		2649-2659		7	118		Biotechnol. Bioeng.								English							Place: Hoboken Publisher: Wiley WOS:000647230000001				covid-19; vaccine; bioreactor production; rVSV-ZEBOV; Vero suspension culture; vesicular stomatitis-virus; viral vaccine bioprocess
GFH42LMB	journalArticle	2021	Kurita, Junko; Sugawara, Tamie; Ohkusa, Yasushi	Paper: Excess Mortality Probably Attributable to COVID-19 in Tokyo, Japan During August and October 2020	Journal of Disaster Research		1881-2473	10.20965/jdr.2021.p0890		Background: By March, 2021, the COVID-19 out-break had reached its highest peak at the end of December, 2020. Nevertheless, no remarkable excess mortality attributable to COVID-19 has been observed. Object: We sought to quantify excess mortality in April using the National Institute of Infectious Diseases (NIID) model. Method: We applied the NIID model to deaths of all causes from 1987 through Fe…	Aug-21	2022/9/20 10:55	2022/9/20 10:55		890-894		5	16		J. Disaster Res.								English							Place: Tokyo Publisher: Fuji Technology Press Ltd WOS:000680753900007				covid-19; influenza vaccination; risk; all cause death; association; excess mortality; NIID model; stochastic frontier estimation
SLIXD4PD	journalArticle	2022	Smith, Clare; Odd, David; Harwood, Rachel; Ward, Joseph; Linney, Mike; Clark, Matthew; Hargreaves, Dougal; Ladhani, Shamez N.; Draper, Elizabeth; Davis, Peter J.; Kenny, Simon E.; Whittaker, Elizabeth; Luyt, Karen; Viner, Russell; Fraser, Lorna K.	Deaths in children and young people in England after SARS-CoV-2 infection during the first pandemic year	Nature Medicine		1078-8956	10.1038/s41591-021-01578-1		Severe acute respiratory syndrome coronavirus 2 (SARS-CoV-2) infection is rarely fatal in children and young people (CYP, <18 years old), but quantifying the risk of death is challenging because CYP are often infected with SARS-CoV-2 exhibiting no or minimal symptoms. To distinguish between CYP who died as a result of SARS-CoV-2 infection and those who died of another cause but were coincidentall…	Jan-22	2022/9/20 10:55	2022/9/20 10:55		185-+		1	28		Nat. Med.								English							Place: Berlin Publisher: Nature Portfolio WOS:000717406200009				epidemiology
H4JH2KYQ	journalArticle	2021	Paulson, Katherine R.; Kamath, Aruna M.; Alam, Tahiya; Bienhoff, Kelly; Abady, Gdiom Gebreheat; Abbas, Jaffar; Abbasi-Kangevari, Mohsen; Abbastabar, Hedayat; Abd-Allah, Foad; Abd-Elsalam, Sherief M.; Abdoli, Amir; Abedi, Aidin; Abolhassani, Hassan; Abreu, Lucas Guimaraes; Abu-Gharbieh, Eman; Abu-Rmeileh, Niveen M. E.; Abushouk, Abdelrahman; Adamu, Aishatu L.; Adebayo, Oladimeji M.; Adegbosin, Ade…	Global, regional, and national progress towards Sustainable Development Goal 3.2 for neonatal and child health: all-cause and cause-specific mortality findings from the Global Burden of Disease Study 2019	Lancet		0140-6736	10.1016/S0140-6736(21)01207-1		Background Sustainable Development Goal 3.2 has targeted elimination of preventable child mortality, reduction of neonatal death to less than 12 per 1000 livebirths, and reduction of death of children younger than 5 years to less than 25 per 1000 livebirths, for each country by 2030. To understand current rates, recent trends, and potential trajectories of child mortality for the next decade, we …	2021/9/4	2022/9/20 10:55	2022/9/20 10:55		870-905		10303	398		Lancet								English							Place: New York Publisher: Elsevier Science Inc WOS:000692628000023				countries; deaths; infant; inform; stillbirths; systematic analysis; trends; under-5 mortality
L5LHTPV6	journalArticle	2021	Liu, Xinxue; Shaw, Robert H.; Stuart, Arabella S. V.; Greenland, Melanie; Aley, Parvinder K.; Andrews, Nick J.; Cameron, J. Claire; Charlton, Sue; Clutterbuck, Elizabeth A.; Collins, Andrea M.; Dinesh, Tanya; England, Anna; Faust, Saul N.; Ferreira, Daniela M.; Finn, Adam; Green, Christopher A.; Hallis, Bassam; Heath, Paul T.; Hill, Helen; Lambe, Teresa; Lazarus, Rajeka; Libri, Vincenzo; Long, Fe…	Safety and immunogenicity of heterologous versus homologous prime-boost schedules with an adenoviral vectored and mRNA COVID-19 vaccine (Com-COV): a single-blind, randomised, non-inferiority trial	Lancet		0140-6736	10.1016/S0140-6736(21)01694-9		Background Use of heterologous prime-boost COVID-19 vaccine schedules could facilitate mass COVID-19 immunisation. However, we have previously reported that heterologous schedules incorporating an adenoviral vectored vaccine (ChAdOx1 nCoV-19, AstraZeneca; hereafter referred to as ChAd) and an mRNA vaccine (BNT162b2, Pfizer-BioNTech; hereafter referred to as BNT) at a 4-week interval are more reac…	2021/9/4	2022/9/20 10:55	2022/9/20 10:55		856-869		10303	398		Lancet								English							Place: New York Publisher: Elsevier Science Inc WOS:000692628000022				efficacy; reactogenicity
YIUUTR6P	journalArticle	2021	Yang, Feng; Li, Xiaofan; Su, Xiaoting; Xiao, Tingting; Wang, Yang; Hu, Ping; Li, Han; Guan, Jing; Tian, Haizhen; Wang, Peng; Wang, Wencheng	A study on willingness and influencing factors to receive COVID-19 vaccination among Qingdao residents	Human Vaccines & Immunotherapeutics		2164-5515	10.1080/21645515.2020.1817712		This study investigated the willingness of Qingdao residents to receive COVID-19 vaccination in 2020 and any factors that might influence them. All data were collected by telephone questionnaires and were utilized for analyzing the potential factors of willingness to be vaccinated through descriptive analysis and logistic regression analysis. Of the 2,802 respondents, 2,284 (81.5%) said they woul…	2021/2/1	2022/9/20 10:55	2022/9/20 10:55		408-413		2	17		Human Vaccines Immunother.								English							Place: Philadelphia Publisher: Taylor & Francis Inc WOS:000619677500014				willingness; COVID-19 vaccine; free vaccination; influencing factors
QK3WK6CS	journalArticle	2021	An, Pham Le; Nguyen, Han Thi Ngoc; Nguyen, Dung Dang; Vo, Lan Y.; Huynh, Giao	The intention to get a COVID-19 vaccine among the students of health science in Vietnam	Human Vaccines & Immunotherapeutics		2164-5515	10.1080/21645515.2021.1981726		This study determines factors related to the intention to vaccinate against COVID-19 for health science students in Ho Chi Minh City (HCMC), using both the Health Belief Model (HBM) and the Theory of Planned Behavior (TPB) model. A cross-sectional survey was considered in April 2021, using a self-administered questionnaire to all health sciences students of the University of Medicine and Pharmacy…	2021/12/2	2022/9/20 10:55	2022/9/20 10:55		4823-4828		12	17		Human Vaccines Immunother.								English							Place: Philadelphia Publisher: Taylor & Francis Inc WOS:000705416000001				covid-19; vaccination; chi minh city; health belief model; theory of planned behavior; Vietnam
R8UXKX77	journalArticle	2021	Yates, Thomas; Zaccardi, Francesco; Islam, Nazrul; Razieh, Cameron; Gillies, Clare L.; Lawson, Claire A.; Chudasama, Yogini; Rowlands, Alex; Davies, Melanie J.; Docherty, Annemarie B.; Openshaw, Peter J. M.; Baillie, J. Kenneth; Semple, Malcolm G.; Khunti, Kamlesh	Obesity, chronic disease, age, and in-hospital mortality in patients with covid-19: analysis of ISARIC clinical characterisation protocol UK cohort	Bmc Infectious Diseases			10.1186/s12879-021-06466-0		Background Although age, obesity and pre-existing chronic diseases are established risk factors for COVID-19 outcomes, their interactions have not been well researched. Methods We used data from the Clinical Characterisation Protocol UK (CCP-UK) for Severe Emerging Infection developed by the International Severe Acute Respiratory and emerging Infections Consortium (ISARIC). Patients admitted to h…	2021/7/31	2022/9/20 10:55	2022/9/20 10:55		717		1	21		BMC Infect. Dis.								English							Place: London Publisher: Bmc WOS:000679717300001				covid-19; Obesity; Ageing; Chronic disease
52P4ZI7I	journalArticle	2021	Kosarkova, Alice; Malinakova, Klara; van Dijk, Jitse P.; Tavel, Peter	Vaccine Refusal in the Czech Republic Is Associated with Being Spiritual but Not Religiously Affiliated	Vaccines			10.3390/vaccines9101157		A strong reduction in the deleterious effects of the COVID-19 pandemic can be achieved by vaccination. Religiosity and spirituality (R/S) may play an important role in vaccine acceptance. However, evidence is lacking for the associations with religious conspiracy theories (RCT) in a non-religious environment. This study investigated the associations between R/S and RCT about COVID-19 vaccination …	Oct-21	2022/9/20 10:55	2022/9/20 10:55		1157		10	9		Vaccines								English							Place: Basel Publisher: Mdpi WOS:000712648600001				COVID-19 vaccine; hesitancy; vaccination; belief; conspiracy theories; fundamentalism; religiosity; religious conspiracy beliefs; spirituality
6ZH7VRPW	journalArticle	2021	Li, Zhizhen; Wu, Jianping; Zhou, Ji; Yuan, Baoshi; Chen, Jiqiao; Wu, Wanchen; Mo, Lian; Qu, Zhipeng; Zhou, Fei; Dong, Yingying; Huang, Kai; Liu, Zhiwei; Wang, Tao; Symmes, Deebie; Gu, Jingliang; Sho, Eiketsu; Zhang, Jingping; Chen, Ruihuan; Xu, Ying	A Vimentin-Targeting Oral Compound with Host-Directed Antiviral and Anti-Inflammatory Actions Addresses Multiple Features of COVID-19 and Related Diseases	Mbio		2150-7511	10.1128/mBio.02542-21		Damage in COVID-19 results from both the SARS-CoV-2 virus and its triggered overactive host immune responses. Therapeutic agents that focus solely on reducing viral load or hyperinflammation fail to provide satisfying outcomes in all cases. Although viral and cellular factors have been extensively profiled to identify potential anti-COVID-19 targets, new drugs with significant efficacy remain to …	Oct-21	2022/9/20 10:55	2022/9/20 10:55		e02542-21		5	12		mBio								English							Place: Washington Publisher: Amer Soc Microbiology WOS:000735255900005				covid-19; anti-inflammation; filaments; host-directed antiviral; regulatory t-cells; small molecule; vimentin
9EE626DT	journalArticle	2021	Alonso, Ricardo; Chertcoff, Anibal; Leguizamon, Felisa del; Goiry, Lorna Galleguillos; Eizaguirre, Maria B.; Rodriguez, Roberto; Sosa, Marta; Carballido, Susana; Cruchet, Veronica; De Jong-Martis, Agnes; Giachello, Susana; Henestroza, Paula; Ferrandina, Flavia; Bauer, Johana; Carra, Adriana; Silva, Berenice A.	Evaluation of short-term safety of COVID-19 vaccines in patients with multiple sclerosis from Latin America	Multiple Sclerosis Journal-Experimental Translational and Clinical			10.1177/20552173211061543		Background To date, there are no data available on the safety of COVID-19 vaccines in Latin American patients with Multiple Sclerosis (MS). Objective Characterize safety of COVID-19 vaccines in Latin American (LATAM) patients with Multiple Sclerosis (pwMS). Methods A cross-sectional study between February 1, 2021, and April 30, 2021. Individuals with MS from LATAM countries were invited to partic…	Oct-21	2022/9/20 10:55	2022/9/20 10:55		2.05522E+16		4	7		Mult. Scler. J. Exp. Transl. Clin.								English							Place: Thousand Oaks Publisher: Sage Publications Inc WOS:000724552200001				covid-19; vaccination; vaccines; safety; Multiple sclerosis; relapse
VW6G7WJC	journalArticle	2021	Loubet, Paul; Rouviere, Jalini; Merceron, Adeline; Launay, Odile; Sotto, Albert	Patients' Perception and Knowledge about Influenza and Pneumococcal Vaccination during the COVID-19 Pandemic: An Online Survey in Patients at Risk of Infections	Vaccines			10.3390/vaccines9111372		Introduction: The objective of our study was to assess, in an at-risk population, perception and knowledge about influenza and pneumococcal vaccinations. Methods: An anonymous web-based survey was submitted to patients recruited in France, from both an Ipsos internal panel and AVNIR patient associations. The study was conducted between July and October 2020, in the context of the COVID-19 pandemi…	Nov-21	2022/9/20 10:55	2022/9/20 10:55		1372		11	9		Vaccines								English							Place: Basel Publisher: Mdpi WOS:000725189700001				immunization; vaccination; COVID-19 vaccines; immunocompromised; pneumococcal vaccines; pneumonia; seasonal influenza vaccines; vaccination coverage
CYPKWMVM	journalArticle	2021	Yadav, Reetika Malik; Pate, Archana; Shankarkumar, Aruna; Athalye, Shreyasi; Shinde, Shweta; Bargir, Umair Ahmed; Pate, Mangesh; Ganpule, Makarand; Pruthi, Meena; Patil, Hemant; Madkaikar, Manisha Rajan	Serosurvey for Health-Care Workers Provides Supportive Evidence for the Effectiveness of Hydroxychloroquine Prophylaxis against SARS-CoV-2 Infection	Journal of Epidemiology and Global Health		2210-6006	10.2991/jegh.k.210518.001		Background: The Severe Acute Respiratory Syndrome Coronavirus 2 (SARS-CoV-2) pandemic has resulted in occupational exposure among Healthcare Workers (HCWs) and a high risk of nosocomial transmission. Asymptomatic infection and transmission of infection before the development of symptoms are well-recognized factors contributing to the spread of infection. We conducted a cross-sectional observation…	Sep-21	2022/9/20 10:55	2022/9/20 10:55		283-288		3	11		J. Epidemiol. Glob. Health								English							Place: London Publisher: Springernature WOS:000698567700007				covid-19; SARS-CoV-2; healthcare workers; hydroxychloroquine; prophylaxis; Sero-surveillance; wuhan
ILA32VYH	journalArticle	2021	Oehmke, Theresa B.; Post, Lori A.; Moss, Charles B.; Issa, Tariq Z.; Boctor, Michael J.; Welch, Sarah B.; Oehmke, James F.	Dynamic Panel Data Modeling and Surveillance of COVID-19 in Metropolitan Areas in the United States: Longitudinal Trend Analysis	Journal of Medical Internet Research		1438-8871	10.2196/26081		Background: The COVID-19 pandemic has had profound and differential impacts on metropolitan areas across the United States and around the world. Within the United States, metropolitan areas that were hit earliest with the pandemic and reacted with scientifically based health policy were able to contain the virus by late spring. For other areas that kept businesses open, the first wave in the Unit…	2021/2/9	2022/9/20 10:55	2022/9/20 10:55		e26081		2	23		J. Med. Internet Res.								English							Place: Toronto Publisher: Jmir Publications, Inc WOS:000616405900005				covid-19; spread; SARS-CoV-2; sars-cov-2; coronavirus; Arellano-Bond estimator; Atlanta; Baltimore; Boston; Charlotte; Chicago; COVID-19 7-day lag; COVID-19 cities; COVID-19 metropolitan areas; COVID-19 transmission jerk; COVID-19 transmission deceleration; Dallas; dc; Denver; Detroit; dynamic panel data; generalized method of moments; generalized method of the moments; global COVID-19 surveillan…
E37AEY2M	journalArticle	2021	Li, Mengyuan; Guo, Xiaonan; Wang, Xiaosheng	Retrospective prediction of the epidemic trend of COVID-19 in Wuhan at four phases	Journal of Medical Virology		0146-6615	10.1002/jmv.26781		The coronavirus disease 2019 (COVID-19) outbreak caused by severe acute respiratory syndrome coronavirus 2 (SARS-CoV-2) began in December 2019 and was basically under control in April 2020 in Wuhan. To explore the impact of intervention measures on the COVID-19 epidemic, we established susceptible-exposed-infectious-recovered (SEIR) models to predict the epidemic characteristics of COVID-19 at fo…	Apr-21	2022/9/20 10:55	2022/9/20 10:55		2493-2498		4	93		J. Med. Virol.								English							Place: Hoboken Publisher: Wiley WOS:000609912000001				SEIR model; COVID-19 epidemic; infection rate; interventional measures; reproduction number
NB7DNPD5	journalArticle	2021	Trougakos, Ioannis P.; Terpos, Evangelos; Zirou, Christina; Sklirou, Aimilia D.; Apostolakou, Filia; Gumeni, Sentiljana; Charitaki, Ioanna; Papanagnou, Eleni-Dimitra; Bagratuni, Tina; Liacos, Christine-Ivy; Scorilas, Andreas; Korompoki, Eleni; Papassotiriou, Ioannis; Kastritis, Efstathios; Dimopoulos, Meletios A.	Comparative kinetics of SARS-CoV-2 anti-spike protein RBD IgGs and neutralizing antibodies in convalescent and naive recipients of the BNT162b2 mRNA vaccine versus COVID-19 patients	Bmc Medicine		1741-7015	10.1186/s12916-021-02090-6		Background: Coronavirus SARS-CoV-2, the causative agent of COVID-19, has caused a still evolving global pandemic. Given the worldwide vaccination campaign, the understanding of the vaccine-induced versus COVID-19-induced immunity will contribute to adjusting vaccine dosing strategies and speeding-up vaccination efforts. Methods: Anti-spike-RBD IgGs and neutralizing antibodies (NAbs) titers were m…	2021/8/23	2022/9/20 10:55	2022/9/20 10:55		208		1	19		BMC Med.								English							Place: London Publisher: Bmc WOS:000687154000001				covid-19; SARS-CoV-2; immunity; infection; Anti-S-RBD IgGs; BNT162b2 vaccine; Neutralizing antibodies; Viral infection
UISZYSCC	journalArticle	2021	Macedo-Ojeda, Gabriela; Francisco Munoz-Valle, Jose; Yokogawa-Teraoka, Patricia; Carolina Machado-Sulbaran, Andrea; Guadalupe Loza-Rojas, Maria; Citlally Garcia-Arredondo, Atziri; Tejeda-Constantini, Rafael; Natali Vega-Magana, Alejandra; Gonzalez-Estevez, Guillermo; Garcia-Chagollan, Mariel; Sergio Zepeda-Nuno, Jose; Hernandez-Bello, Jorge	COVID-19 Screening by Anti-SARS-CoV-2 Antibody Seropositivity: Clinical and Epidemiological Characteristics, Comorbidities, and Food Intake Quality	International Journal of Environmental Research and Public Health			10.3390/ijerph18178995		Developing countries have reported lower molecular diagnostic testing levels due to a lack of resources. Therefore, antibody tests represent an alternative to detect exposure to SARS-CoV-2 and analyze possible risk factors. We aimed to describe and compare the clinical-epidemiological characteristics and the quality of food intake in Mexican individuals with a positive or negative test to antibod…	Sep-21	2022/9/20 10:55	2022/9/20 10:55		8995		17	18		Int. J. Environ. Res. Public Health								English							Place: Basel Publisher: Mdpi WOS:000694112800001				covid-19; clinical characteristics; food intake quality; serological testing
EHHIAMKD	journalArticle	2021	Embi, Peter J.; Levy, Matthew E.; Naleway, Allison L.; Patel, Palak; Gaglani, Manjusha; Natarajan, Karthik; Dascomb, Kristin; Ong, Toan C.; Klein, Nicola P.; Liao, I.-Chia; Grannis, Shaun J.; Han, Jungmi; Stenehjem, Edward; Dunne, Margaret M.; Lewis, Ned; Irving, Stephanie A.; Rao, Suchitra; McEvoy, Charlene; Bozio, Catherine H.; Murthy, Kempapura; Dixon, Brian E.; Grisel, Nancy; Yang, Duck-Hye; …	Effectiveness of 2-Dose Vaccination with mRNA COVID-19 Vaccines Against COVID-19-Associated Hospitalizations Among Immunocompromised Adults - Nine States, January-September 2021	Mmwr-Morbidity and Mortality Weekly Report		0149-2195				2021/11/5	2022/9/20 10:55	2022/9/20 10:55		1553-1559		44	70		MMWR-Morb. Mortal. Wkly. Rep.								English							Place: Atlanta Publisher: Centers Disease Control & Prevention WOS:000717047000001
E6QEXKD8	journalArticle	2021	Resnicow, Ken; Bacon, Elizabeth; Yang, Penny; Hawley, Sarah; Van Horn, M. Lee; An, Lawrence	Novel Predictors of COVID-19 Protective Behaviors Among US Adults: Cross-sectional Survey	Journal of Medical Internet Research		1438-8871	10.2196/23488		Background: A central component of the public health strategy to control the COVID-19 pandemic involves encouraging mask wearing and social distancing to protect individuals from acquiring and transmitting the virus. Objective: This study aims to understand the psychological factors that drive adoption or rejection of these protective behaviors, which can inform public health interventions to con…	2021/4/20	2022/9/20 10:55	2022/9/20 10:55		e23488		4	23		J. Med. Internet Res.								English							Place: Toronto Publisher: Jmir Publications, Inc WOS:000642263900003				covid-19; public health; protection; reactance; behavior; conspiracy beliefs; communication; health communication; hiv/aids; protective behavior; psychological predictors; psychological reactance; psychology
JMMNJQL3	journalArticle	2022	Luca, Antonina; Squillaci, Raffaele; Terravecchia, Claudio; Contrafatto, Federico; Reggio, Ester; Nicoletti, Alessandra; Zappia, Mario	Pure sensitive chronic inflammatory axonal polyneuropathy following Pfizer COVID-19 vaccine	Neurological Sciences		1590-1874	10.1007/s10072-021-05696-z		Background During the worldwide mass vaccination campaign against SARS-CoV-2, multiple side effects have been observed. We described the case of a patient who developed pure sensitive chronic inflammatory axonal polyneuropathy (CIAP) in a close temporal relationship with the administration of the BNT162b2 (Pfizer (R)) vaccine. Case report An 82-year-old woman developed lower limb sensory loss and…	Feb-22	2022/9/20 10:55	2022/9/20 10:55		1431-1433		2	43		Neurol. Sci.								English							Place: Milan Publisher: Springer-Verlag Italia Srl WOS:000714315000001				covid-19; Vaccination; ciap; Polyneuropathy
GA2HY7C2	journalArticle	2021	Ramonfaur, Diego; Hinojosa-Gonzalez, David Eugenio; Rodriguez-Gomez, Gloria Paulina; Iruegas-Nunez, David Alejandro; Flores-Villalba, Eduardo	COVID-19 vaccine hesitancy and acceptance in Mexico: a web-based nationwide survey	Revista Panamericana De Salud Publica-Pan American Journal of Public Health		1020-4989	10.26633/RPSP.2021.133		Objective. To identify factors associated with COVID-19 vaccine hesitancy and acceptance among the Mexican population. Methods. In a web-based nationwide survey in early December 2020, respondents were inquired about their sociodemographic characteristics and their willingness to accept a hypothetical COVID-19 vaccine given a 50% or 90% effectiveness. A logistic regression model was used to ident…	2021	2022/9/20 10:55	2022/9/20 10:55		e133			45		Rev. Panam. Salud Publica								English							Place: Washington Publisher: Pan Amer Health Organization WOS:000728712100001				covid-19; anti-vaccination movement; mass vaccination; Mexico; surveys and questionnaires; vaccination refusal
EWP865HY	journalArticle	2021	Eguia, Hans; Vinciarelli, Franco; Bosque-Prous, Marina; Kristensen, Troels; Saigi-Rubio, Francesc	Spain's Hesitation at the Gates of a COVID-19 Vaccine	Vaccines			10.3390/vaccines9020170		(1) Background: This study aims to delineate a pattern on vaccine hesitancy in a sample of the Spanish population, considering age groups and status as healthcare workers. (2) Methods: Participants were recruited using Twitter (R) as a dissemination tool to reach as many respondents as possible in different parts of the Spanish territory. The participants were recruited in a cross-sectional study…	Feb-21	2022/9/20 10:55	2022/9/20 10:55		170		2	9		Vaccines								English							Place: Basel Publisher: Mdpi WOS:000623264300001				covid-19; hesitancy; perception; socio-cultural factors; vaccination hesitancy
Q6VKUZWE	journalArticle	2021	Jasuja, Guneet K.; Meterko, Mark; Bradshaw, Ledjona D.; Carbonaro, Richard; Clayman, Marla L.; LoBrutto, Lara; Miano, Danielle; Maguire, Elizabeth M.; Midboe, Amanda M.; Asch, Steven M.; Gifford, Allen L.; McInnes, D. Keith; Elwy, A. Rani	Attitudes and Intentions of US Veterans Regarding COVID-19 Vaccination	Jama Network Open		2574-3805	10.1001/jamanetworkopen.2021.32548		IMPORTANCE Compared with the general population, veterans are at high risk for COVID-19 and have a complex relationship with the government. This potentially affects their attitudes toward receiving COVID-19 vaccines. OBJECTIVE To assess veterans' attitudes toward and intentions to receive COVID-19 vaccines. DESIGN, SETTING, AND PARTICIPANTS This cross-sectional web-based survey study used data f…	2021/11/3	2022/9/20 10:55	2022/9/20 10:55		e2132548		11	4		JAMA Netw. Open								English							Place: Chicago Publisher: Amer Medical Assoc WOS:000714704700004				hesitancy; care
HC955AI2	journalArticle	2021	Yuen, Kit-San; Ye, Zi-Wei; Fung, Sin-Yee; Cheung, Pak-Hin Hinson; Chan, Chi-Ping; Jin, Dong-Yan	SARS-CoV-2 and COVID-19: revisiting the most important research questions	Cell and Bioscience			10.1186/s13578-021-00730-1		In February 2020, we highlighted the top nine important research questions on SARS-CoV-2 and COVID-19 concerning virus transmission, asymptomatic and presymptomatic virus shedding, diagnosis, treatment, vaccine development, origin of virus and viral pathogenesis. These and related questions are revisited at the end of 2021 to shed light on the roadmap of bringing an end to the pandemic.	2021/12/18	2022/9/20 10:55	2022/9/20 10:55		215		1	11		Cell Biosci.								English							Place: London Publisher: Bmc WOS:000731390500002				covid-19; SARS-CoV-2; Vaccines; Pandemic; Antivirals; Endemic
XIILGCLB	journalArticle	2021	Sun, Qisi; Fathy, Ramie; McMahon, Devon E.; Freeman, Esther E.	COVID-19 Vaccines and the Skin The Landscape of Cutaneous Vaccine Reactions Worldwide	Dermatologic Clinics		0733-8635	10.1016/j.det.2021.05.016			Oct-21	2022/9/20 10:55	2022/9/20 10:55		653-673		4	39		Dermatol. Clin.								English							Place: Philadelphia Publisher: W B Saunders Co-Elsevier Inc WOS:000701699300016				covid-19; Vaccines; Adverse; Cutaneous; Moderna; Reactions; sex-differences; Side effects; Urticaria
NBGKPGLU	journalArticle	2022	Butter, Sarah; McGlinchey, Emily; Berry, Emma; Armour, Cherie	Psychological, social, and situational factors associated with COVID-19 vaccination intentions: A study of UK key workers and non-key workers	British Journal of Health Psychology		1359-107X	10.1111/bjhp.12530		Objectives Vaccine hesitancy is a growing concern and threat to public health. This research will begin to examine the relative influence of relevant psychological, social, and situational factors on intent to engage with a hypothetical COVID-19 vaccine among key workers and non-key workers. Design Cross-sectional. Methods The study utilized a sample of UK adults who completed the 1-month follow-…	Feb-22	2022/9/20 10:55	2022/9/20 10:55		13-29		1	27		Br. J. Health Psychol.								English							Place: Hoboken Publisher: Wiley WOS:000646970200001				covid-19; vaccine; hesitancy; coronavirus; vaccines; behavior; health behaviours; perceived risk; symptom severity
4R3DQNBU	journalArticle	2022	Wang, Jiahao; Zhu, He; Lai, Xiaozhen; Zhang, Haijun; Huang, Yingzhe; Feng, Huangyufei; Lyu, Yun; Jing, Rize; Guo, Jia; Fang, Hai	From COVID-19 Vaccination Intention to Actual Vaccine Uptake: A Longitudinal Study Among Chinese Adults After Six Months of a National Vaccination Campaign	Expert Review of Vaccines		1476-0584	10.1080/14760584.2022.2021076		Background Mass COVID-19 vaccination campaigns have been launched globally, but the translation from vaccination intention to actual vaccine uptake by the public remains unknown, hindering the evaluation of present promotion strategies. Methods Six months after the national vaccination campaign in China, a longitudinal study was conducted among the Chinese adult population, whose vaccination inte…	2022/3/4	2022/9/20 10:55	2022/9/20 10:55		385-395		3	21		Expert Rev. Vaccines								English							Place: Abingdon Publisher: Taylor & Francis Ltd WOS:000737043400001				covid-19; SARS-CoV-2; hesitancy; coverage; China; longitudinal study; pandemic influenza; vaccination intention; vaccine uptake
QU95UR2B	journalArticle	2021	Che, Yanchun; Liu, Xiaoqiang; Pu, Yi; Zhou, Meijian; Zhao, Zhimei; Jiang, Ruiju; Yin, Zhifang; Xu, Mingjue; Yin, Qiongzhou; Wang, Jianfeng; Pu, Jing; Zhao, Heng; Zhang, Ying; Wang, Lichun; Jiang, Ya; Lei, Jin; Zheng, Yan; Liao, Yun; Long, Runxiang; Yu, Li; Cui, Pingfang; Yang, Huijuan; Zhang, Yuehui; Li, Jingyu; Chen, Weiwu; He, Zhanlong; Ma, Kaili; Hong, Chao; Li, Dandan; Jiang, Guorun; Liu, Don…	Randomized, Double-Blinded, Placebo-Controlled Phase 2 Trial of an Inactivated Severe Acute Respiratory Syndrome Coronavirus 2 Vaccine in Healthy Adults	Clinical Infectious Diseases		1058-4838	10.1093/cid/ciaa1703		Background. We evaluated an inactivated severe acute respiratory syndrome coronavirus 2 (SARS-CoV-2) vaccine for immunogenicity and safety in adults aged 18-59 years. Methods. In this randomized, double-blinded, controlled trial, healthy adults received a medium dose (MD) or a high dose (HD) of the vaccine at an interval of either 14 days or 28 days. Neutralizing antibody (NAb) and anti-S and ant…	2021/12/1	2022/9/20 10:55	2022/9/20 10:55		E3949-E3955		11	73		Clin. Infect. Dis.								English							Place: Cary Publisher: Oxford Univ Press Inc WOS:000735309500048				safety; immunogenicity; inactivated SARS-CoV-2 vaccine; phase 2 trial
27ECU28N	journalArticle	2021	Fu, Yu; Chen, Fang; Cui, Lifen; Zhao, Yue; Zhang, Henan; Fu, Shuang; Zhang, Jihong	Immunological Analysis of People in Northeast China after SARS-CoV-2 Inactivated Vaccine Injection	Vaccines			10.3390/vaccines9091028		Clarifying changes in the immune microenvironment caused by vaccination is crucial for the development and application of vaccines. In this study, we analyzed seroconversion of antibodies, 12 key cytokines, and 34 lymphocyte subsets at three time points (D-1, D14, and D42) around vaccination and differences between two inactivated vaccines (Sinopharm and Sinovas) to understand the immune response…	Sep-21	2022/9/20 10:55	2022/9/20 10:55		1028		9	9		Vaccines								English							Place: Basel Publisher: Mdpi WOS:000702085300001				covid-19; SARS-CoV-2; neutralizing antibodies; immunity; cytokines; inactivated vaccines; lessons; lymphocyte subsets
T8QN6SSP	journalArticle	2021	Jamison, Dean T.; Wu, Kin Bing	The East-West Divide in Response to COVID-19	Engineering		2095-8099	10.1016/j.eng.2021.05.008		Coronavirus disease 2019 (COVID-19) deaths per million population in the countries of the West had often exceeded those in the countries of the East by factor of 100 by May 2021. In this paper, we refer to the West as represented by the United States plus the five most populous countries of Western Europe (France, Germany, Italy, Spain, and the United Kingdom), and the East as the 15 countries in…	Jul-21	2022/9/20 10:55	2022/9/20 10:55		936-947		7	7		Engineering								English							Place: Amsterdam Publisher: Elsevier WOS:000711220200010				sars-cov-2; Vaccination; Non-pharmaceutical interventions; china; Pandemic; Coronavirus disease 2019; Isolation
TBD7JV9C	journalArticle	2022	Yu, Jian; Sun, Shanshan; Tang, Qianqian; Wang, Chengzhuo; Yu, Liangchen; Ren, Lulu; Li, Jun; Zhang, Zhenhua	Establishing reference sequences for each clade of SARS-CoV-2 to provide a basis for virus variation and function research	Journal of Medical Virology		0146-6615	10.1002/jmv.27476		Coronavirus disease 2019 (COVID-19) is a severe respiratory disease caused by the highly infectious severe acute respiratory syndrome coronavirus 2 (SARS-CoV-2). As the COVID-19 pandemic continues, mutations of SARS-CoV-2 accumulate. These mutations may not only make the virus spread faster, but also render current vaccines less effective. In this study, we established a reference sequence for ea…	Apr-22	2022/9/20 10:55	2022/9/20 10:55		1494-1501		4	94		J. Med. Virol.								English							Place: Hoboken Publisher: Wiley WOS:000724634900001				SARS-CoV-2; coronavirus; characterizing mutation; high-frequency mutation; reference sequence; variation analyses
B58PLIXG	journalArticle	2021	Hanke, Wojciech; Pietrzak, Patrycja	BIOLOGICAL SECURITY OF THE SARS-COV-2 (COVID-19) INFECTION IN LARGE WORKPLACES OUTSIDE THE HEALTHCARE SECTOR - AN EPIDEMIOLOGIST'S POINT OF VIEW	Medycyna Pracy		0465-5893	10.13075/mp.5893.01036		Populations in large workplaces are particularly susceptible to the risk of severe acute respiratory syndrome coronavirus 2 (SARS-CoV-2) infection. In the following article, an attempt has been made to identify main problems regarding the biological security in large workplaces outside the healthcare sector, while simultaneously pointing out the possible solutions to these problems. In this artic…	2021	2022/9/20 10:55	2022/9/20 10:55		89-97		1	72		Med. Pr.								English							Place: Lodz Publisher: Nofer Inst Occupational Medicine, Sw WOS:000619655600009				covid-19; prevention; workplace; viral infection; biological security; workers
4S6DTLSC	journalArticle	2021	Selby, Laura M.; Hewlett, Angela L.; Cawcutt, Kelly A.; Wood, Macy G.; Balfour, Teresa L.; Rupp, Mark E.; Starlin, Richard C.	Effect of severe acute respiratory coronavirus virus 2 (SARS-CoV-2 ) mRNA vaccination in healthcare workers with high-risk coronavirus disease 2019 (COVID-19) exposure	Infection Control and Hospital Epidemiology		0899-823X	10.1017/ice.2021.193			Oct-21	2022/9/20 10:55	2022/9/20 10:55		1281-1282		10	42		Infect. Control Hosp. Epidemiol.								English							Place: New York Publisher: Cambridge Univ Press WOS:000721253200022
W2WJ37P6	journalArticle	2022	Burns, Veronica M.; Castillo, Fritz M.; Coldren, Rodney L.; Prosser, Trisha; Howell, Renee L.; Kabbur, Mahendra B.	Perceptions of Seasonal Influenza Vaccine Among US Army Civilians and Dependents in the Kaiserslautern Military Community: A Mixed-Methods Survey	Military Medicine		0026-4075	10.1093/milmed/usaa572		Introduction Influenza is a globally occurring viral respiratory infection that can lead to hospitalizations and death. An influenza outbreak can interfere with combat readiness in a military setting, as the infection can incapacitate soldiers. Vaccination remains the most effective tool to prevent and mitigate seasonal influenza. Although influenza vaccinations for U.S. Army soldiers can be moni…	2022/3/28	2022/9/20 10:55	2022/9/20 10:55		E394-E403		3月4日	187		Milit. Med.								English							Place: Oxford Publisher: Oxford Univ Press WOS:000764373400001				beliefs; experience
RA9CUI57	journalArticle	2021	Rice, Adrian; Verma, Mohit; Shin, Annie; Zakin, Lise; Sieling, Peter; Tanaka, Shiho; Balint, Joseph; Dinkins, Kyle; Adisetiyo, Helty; Morimoto, Brett; Higashide, Wendy; Olson, C. Anders; Mody, Shivani; Spilman, Patricia; Gabitzsch, Elizabeth; Safrit, Jeffrey T.; Rabizadeh, Shahrooz; Niazi, Kayvan; Soon-Shiong, Patrick	Intranasal plus subcutaneous prime vaccination with a dual antigen COVID-19 vaccine elicits T-cell and antibody responses in mice	Scientific Reports		2045-2322	10.1038/s41598-021-94364-5		We have developed a COVID-19 vaccine, hAd5 S-Fusion + N-ETSD, that expresses SARS-CoV-2 spike (S) and nucleocapsid (N) proteins with modifications to increase immune responses delivered using a human adenovirus serotype 5 (hAd5) platform. Here, we demonstrate subcutaneous (SC) prime and SC boost vaccination of CD-1 mice with this dual-antigen vaccine elicits T-helper cell 1 (Th1) biased T-cell an…	2021/7/21	2022/9/20 10:55	2022/9/20 10:55		14917		1	11		Sci Rep								English							Place: Berlin Publisher: Nature Portfolio WOS:000687318300020				protection; replication; adenovirus; e1; immune-responses; memory; n protein; polymerase; sars coronavirus; vectors
9SJ95ZY9	journalArticle	2021	Mahto, Mala; Banerjee, Ayan; Biswas, Bijit; Kumar, Sushil; Agarwal, Neeraj; Singh, Prabhat Kumar	Seroprevalence of IgG against SARS-CoV-2 and its determinants among healthcare workers of a COVID-19 dedicated hospital of India	American Journal of Blood Research		2160-1992			Healthcare workers (HCWs) due to their job profile are at utmost risk of contracting severe acute respiratory syndrome coronavirus-2 (SARS-CoV-2) infection. Serological survey is an useful tool for vulnerability mapping in an infectious disease pandemic. The aim of the current study was to assess seroprevalence of IgG against SARS-CoV-2 and its determinants among HCWs of a tertiary healthcare fac…	2021	2022/9/20 10:55	2022/9/20 10:55		44-52		1	11		Am. J. Blood Res.								English							Place: Madison Publisher: E-Century Publishing Corp WOS:000626826800003				covid-19; infection; anemia; epidemiologic factors; health personnel; immunoglobulin G; seroepidemiologic studies
5QZMI5FM	journalArticle	2021	Yang, Tzu-Jing; Yu, Pei-Yu; Chang, Yuan-Chih; Hsu, Shang-Te Danny	D614G mutation in the SARS-CoV-2 spike protein enhances viral fitness by desensitizing it to temperature-dependent denaturation	Journal of Biological Chemistry			10.1016/j.jbc.2021.101238		The D614G mutation in the spike protein of SARS-CoV-2 alters the fitness of the virus, leading to the dominant form observed in the COVID-19 pandemic. However, the molecular basis of the mechanism by which this mutation enhances fitness is not clear. Here we demonstrated by cryo-electron microscopy that the D614G mutation resulted in increased propensity of multiple receptor-binding domains (RBDs…	Oct-21	2022/9/20 10:55	2022/9/20 10:55		101238		4	297		J. Biol. Chem.								English							Place: Amsterdam Publisher: Elsevier WOS:000713100100008				cryo-em structure; visualization
USUFSUAX	journalArticle	2021	Zhang, Ting; Wang, Qing; Leng, Zhiwei; Yang, Yuan; Yang, Jin; Chen, Fangyuan; Jia, Mengmeng; Zhang, Xingxing; Qi, Weiran; Xu, Yunshao; Chen, Siya; Dai, Peixi; Ma, Libing; Feng, Luzhao; Yang, Weizhong	A Scenario-Based Evaluation of COVID-19-Related Essential Clinical Resource Demands in China	Engineering		2095-8099	10.1016/j.eng.2021.03.0202095-8099		The coronavirus disease 2019 (COVID-19) pandemic is a global crisis, and medical systems in many countries are overwhelmed with supply shortages and increasing demands to treat patients due to the surge in cases and severe illnesses. This study aimed to assess COVID-19-related essential clinical resource demands in China, based on different scenarios involving COVID-19 spreads and interventions. …	Jul-21	2022/9/20 10:55	2022/9/20 10:55		948-957		7	7		Engineering								English							Place: Amsterdam Publisher: Elsevier WOS:000711220200011				covid-19; impact; Vaccination; epidemic; time; Clinical resource demands; Transmission dynamics model
DSQ2NLD3	journalArticle	2021	Nazaruk, Paulina; Monticolo, Marta; Jedrzejczak, Anna Maria; Krata, Natalia; Moszczuk, Barbara; Sanko-Resmer, Joanna; Pilecki, Tomasz; Urbanowicz, Arkadiusz; Florczak, Michal; Paczek, Leszek; Foroncewicz, Bartosz; Mucha, Krzysztof	Unexpectedly High Efficacy of SARS-CoV-2 BNT162b2 Vaccine in Liver versus Kidney Transplant Recipients-Is It Related to Immunosuppression Only?	Vaccines			10.3390/vaccines9121454		The BNT162b2 vaccine is reportedly effective in preventing severe disease in more than 90% of the general population, but its efficacy in transplant recipients remains controversial. We aimed to determine the immune response to the BNT162b2 vaccine in kidney (KTRs) and liver transplant recipients (LTRs). In this retrospective cohort study, we included randomly 65 KTRs and 65 LTRs, who received tw…	Dec-21	2022/9/20 10:55	2022/9/20 10:55		1454		12	9		Vaccines								English							Place: Basel Publisher: Mdpi WOS:000742885800001				covid-19; SARS-CoV-2; vaccination; covid-19 vaccine; BNT162b2 mRNA; h1n1 vaccine; kidney transplantation; liver transplantation; sot
NSU7ILP2	journalArticle	2021	Patel, Muhammad Haris; Akhtar, Jamshed; Taqvi, Syed Muhammad Raees Hussain; Batool, Tayyaba	Analysis of challenges faced and the scientific content of a hybrid pediatric surgical conference arranged during the COVID-19 pandemic	Annals of Pediatric Surgery		1687-4137	10.1186/s43159-021-00135-2		Background Scientific conferences which are considered as an important event for dissemination of research and related academic activities were badly affected during the COVID-19 pandemic. Virtual format for interaction was used as an alternative method to continue such academic discourse. However, this did not provide the same level of communication and interest as that of in-person meetings. Wi…	2021/10/6	2022/9/20 10:55	2022/9/20 10:55		67		1	17		Ann. Pediatr. Surg.								English							Place: New York Publisher: Springer WOS:000704786600001				COVID-19 pandemic; Annual scientific meeting; Education; Hybrid scientific conference; Virtual conference
7FUTZDX7	journalArticle	2021	Desterke, Christophe; Turhan, Ali G.; Bennaceur-Griscelli, Annelise; Griscelli, Frank	HLA-dependent heterogeneity and macrophage immunoproteasome activation during lung COVID-19 disease	Journal of Translational Medicine			10.1186/s12967-021-02965-5		Background The worldwide pandemic caused by the SARS-CoV-2 virus is characterized by significant and unpredictable heterogeneity in symptoms that remains poorly understood. Methods Transcriptome and single cell transcriptome of COVID19 lung were integrated with deeplearning analysis of MHC class I immunopeptidome against SARS-COV2 proteome. Results An analysis of the transcriptomes of lung sample…	2021/7/5	2022/9/20 10:55	2022/9/20 10:55		290		1	19		J. Transl. Med.								English							Place: London Publisher: Bmc WOS:000669882300001				covid-19; responses; coronavirus; outbreak; dynamics; alveolar macrophages; Antigen presentation; diversity; enrichment analysis; expression; hla; Immunoproteasome; integration; Integrative analysis; Macrophage; MHC class-I; peptidome; Peptidome; Transcriptome
KRUV75EN	journalArticle		Gebremeskel, Teferi Gebru; Kiros, Kalayu; Gesesew, Hailay Abrha; Ward, Paul R.	Awareness, perceptions, and preventive practices of COVID-19 among health workers in Tigray, North Ethiopia	Journal of Public Health-Heidelberg		2198-1833	10.1007/s10389-021-01595-x		Background Despite measures to reduce the spread of COVID-19 in the world, it is increasing day by day. Countries that implement good prevention strategies are less likely to be infected with COVID-19 than those that do not. Therefore, the aim of this study was to assess knowledge, attitude, and preventive practices toward COVID-19 early in the outbreak among health workers in Northern Ethiopia. …		2022/9/20 10:55	2022/9/20 10:55							J. Public Health-Heidelberg								English							Place: Heidelberg Publisher: Springer Heidelberg WOS:000673249400001				covid-19; outbreak; knowledge; Practice; sex-differences; Awareness; Health care worker; Perception; risk-taking behavior
WZQ8K8FX	journalArticle	2021	Gray, William K.; Navaratnam, Annakan; Day, Jamie; Wendon, Julia; Briggs, Tim W. R.	Changes in COVID-19 in-hospital mortality in hospitalised adults in England over the first seven months of the pandemic: An observational study using administrative data	Lancet Regional Health-Europe		2666-7762	10.1016/j.lanepe.2021.100104		Background: Previous research by our team identified factors associated with in-hospital mortality in patients with a diagnosis of COVID-19 in England between March and May 2020. The aim of the current paper was to investigate the changing role of demographics and co-morbidity, with a particular focus on ethnicity, as risk factors for in-hospital mortality over an extended period. Methods: This w…	Jun-21	2022/9/20 10:55	2022/9/20 10:55		100104			5		Lancet Reg. Health-Eur.								English							Place: Amsterdam Publisher: Elsevier WOS:000661887600009				Coronavirus; covid-19; Mortality; risk; Ethnicity; Risk factors
JRHZLUCB	journalArticle	2021	Khan, Amir; Zarin, Rahat; Humphries, Usa Wannasingha; Akgul, Ali; Saeed, Anwar; Gul, Taza	Fractional optimal control of COVID-19 pandemic model with generalized Mittag-Leffler function	Advances in Difference Equations		1687-1847	10.1186/s13662-021-03546-y		In this paper, we consider a fractional COVID-19 epidemic model with a convex incidence rate. The Atangana-Baleanu fractional operator in the Caputo sense is taken into account. We establish the equilibrium points, basic reproduction number, and local stability at both the equilibrium points. The existence and uniqueness of the solution are proved by using Banach and Leray-Schauder alternative ty…	2021/8/19	2022/9/20 10:55	2022/9/20 10:55		387		1	2021		Adv. Differ. Equ.								English							Place: New York Publisher: Springer WOS:000686781700002				transmission; vaccination; infection; global stability; hepatitis-b-virus; Mittag-Leffler function; nonlinear incidence; Numerical simulations; Optimal control; Pandemic model; Sensitivity analysis; stability analysis; Stability analysis
75K8T3VP	journalArticle	2021	Radtke, Thomas; Haile, Sarah R.; Dressel, Holger; Benden, Christian	COVID-19 pandemic restrictions continuously impact on physical activity in adults with cystic fibrosis	Plos One		1932-6203	10.1371/journal.pone.0257852		Background We have recently reported reduced physical activity (PA) in people with cystic fibrosis (pwCF) with and without lung transplantation (LTX) during a 6-week stringent lockdown in Switzerland. This follow-up study explores the impact of coronavirus-2019 disease (COVID-19) related pandemic restrictions on individuals' therapy regimens and health-related aspects in pwCF. Methods We conducte…	2021/9/23	2022/9/20 10:55	2022/9/20 10:55		e0257852		9	16		PLoS One								English							Place: San Francisco Publisher: Public Library Science WOS:000725694500083				health
FNT65MUA	journalArticle	2021	Butler, Savannah E.; Crowley, Andrew R.; Natarajan, Harini; Xu, Shiwei; Weiner, Joshua A.; Bobak, Carly A.; Mattox, Daniel E.; Lee, Jiwon; Wieland-Alter, Wendy; Connor, Ruth; Wright, Peter F.; Ackerman, Margaret E.	Distinct Features and Functions of Systemic and Mucosal Humoral Immunity Among SARS-CoV-2 Convalescent Individuals	Frontiers in Immunology		1664-3224	10.3389/fimmu.2020.618685		Understanding humoral immune responses to SARS-CoV-2 infection will play a critical role in the development of vaccines and antibody-based interventions. We report systemic and mucosal antibody responses in convalescent individuals who experienced varying severity of disease. Whereas assessment of neutralization and antibody-mediated effector functions revealed polyfunctional antibody responses i…	2021/1/28	2022/9/20 10:55	2022/9/20 10:55		618685			11		Front. Immunol.								English							Place: Lausanne Publisher: Frontiers Media Sa WOS:000616810000001				covid-19; SARS-CoV-2; IgG; neutralization; sars coronavirus; antibody; IgA; mucosal immunity; phagocytic-activity; systems serology
6XFMZM87	journalArticle	2022	Connolly, Caoilfhionn M.; Ruddy, Jake A.; Boyarsky, Brian J.; Barbur, Iulia; Werbel, William A.; Geetha, Duvuru; Garonzik-Wang, Jacqueline M.; Segev, Dorry L.; Christopher-Stine, Lisa; Paik, Julie J.	Disease Flare and Reactogenicity in Patients With Rheumatic and Musculoskeletal Diseases Following Two-Dose SARS-CoV-2 Messenger RNA Vaccination	Arthritis & Rheumatology		2326-5191	10.1002/art.41924		Objective To evaluate disease flare and postvaccination reactions (reactogenicity) in patients with rheumatic and musculoskeletal diseases (RMDs) following 2-dose SARS-CoV-2 messenger RNA (mRNA) vaccination. Methods RMD patients (n = 1,377) who received 2-dose SARS-CoV-2 mRNA vaccination between December 16, 2020 and April 15, 2021 completed questionnaires detailing local and systemic reactions e…	Jan-22	2022/9/20 10:55	2022/9/20 10:55		28-32		1	74		Arthritis Rheumatol.								English							Place: Hoboken Publisher: Wiley WOS:000725468700001
FWJUJJ9J	journalArticle	2022	Cserep, Gabor; Morrow, David; Latchford, Karen; Jesset, Rachael; Dosa, Agnes; Kirmizis, Dimitrios	The effect of a single dose of BNT162b2 vaccine on the incidence of severe COVID-19 infection in patients on chronic hemodialysis: a single-centre study	Clinical and Experimental Nephrology		1342-1751	10.1007/s10157-021-02118-4		Introduction In this single-centre retrospective observational study, the 8-week safety and the efficiency of a single dose of BNT162b2 vaccine was studied in 83 HD patients. Methods All clinically stable adult ESRD patients on chronic HD for at least 4 weeks were screened for participation in the study. Exclusion criteria for enrollment in the study included a medical history of COVID-19 infecti…	Jan-22	2022/9/20 10:55	2022/9/20 10:55		54-58		1	26		Clin. Exp. Nephrol.								English							Place: New York Publisher: Springer WOS:000679276500001				covid-19; mortality; registry; BNT162b2 vaccine; Hemodialysis; kidney-transplant recipients
2M9DNPS7	journalArticle	2021	Sharma, Pawan; McAlinden, Kielan D.; Ghavami, Saeid; Deshpande, Deepak A.	Chloroquine: Autophagy inhibitor, antimalarial, bitter taste receptor agonist in fight against COVID-19, a reality check?	European Journal of Pharmacology		0014-2999	10.1016/j.ejphar.2021.173928		The recent SARS-CoV-2 pandemic poses one of the greatest challenges to modern medicine. Therefore, identification of new therapeutic strategies seems essential either based on novel vaccines or drugs or simply repurposing existing drugs. Notably, due to their known safety profile, repurposing of existing drugs is the fastest and highly efficient approach to bring a therapeutic to a clinic for any…	2021/4/15	2022/9/20 10:55	2022/9/20 10:55		173928			897		Eur. J. Pharmacol.								English							Place: Amsterdam Publisher: Elsevier WOS:000628752700006				covid-19; SARS-CoV2; infection; cells; replication; hydroxychloroquine; sars coronavirus; asthma; Bitter taste receptor; cancer; Chloroquine; glycosylation; old drug; relaxation
M3BRNEAQ	journalArticle	2021	Torun, Serife; Ozkaya, Sevket; Sen, Nazan; Kanat, Fikret; Karaman, Irem; Yosunkaya, Sebnem; Sengoren Dikis, Ozlem; Asan, Ali; Aydogan Eroglu, Selma; Semih Atal, Sefa; Ayten, Omer; Aksel, Nimet; Ermis, Hilal; Ozcelik, Neslihan; Demirelli, Meryem; Kara, Iskender; Sumer, Sua; Marakoglu, Kamile; Uzer, Fatih; Uyar, Yasin; Cicek, Tuba; Unsal, Zuhal E.; Vatansev, Husamettin; Botan Yildirim, Berna; Kuruo…	The Relationship between COVID-19 Severity and Bacillus Calmette-Guerin (BCG)/ Mycobacterium tuberculosis exposure history in healthcare workers: a multi-center study	Pathogens and Global Health		2047-7724	10.1080/20477724.2021.1927605		The COVID-19 pandemic has brought countries' health services into sharp focus. It was drawn to our group's attention that healthcare workers (HCWs) had a lower mortality rate against higher COVID-19 incidence compared to the general population in Turkey. Since risk of exposure to tuberculosis bacillus among healthcare workers are higher than the population, we aimed to investigate if there is a r…	2021/8/18	2022/9/20 10:55	2022/9/20 10:55		405-411		6	115		Pathog. Glob. Health								English							Place: Abingdon Publisher: Taylor & Francis Ltd WOS:000652371400001				covid-19; mortality; impact; bcg vaccination; immunity; pneumonia; healthcare workers; bcg; tuberculosis
6S8VEGU8	journalArticle	2021	Xiang, Yong; Wong, Kenneth Chi-Yin; So, Hon-Cheong	Exploring Drugs and Vaccines Associated with Altered Risks and Severity of COVID-19: A UK Biobank Cohort Study of All ATC Level-4 Drug Categories Reveals Repositioning Opportunities	Pharmaceutics			10.3390/pharmaceutics13091514		Effective therapies for COVID-19 are still lacking, and drug repositioning is a promising approach to address this problem. Here, we adopted a medical informatics approach to repositioning. We leveraged a large prospective cohort, the UK-Biobank (UKBB, N similar to 397,000), and studied associations of prior use of all level-4 ATC drug categories (N = 819, including vaccines) with COVID-19 diagno…	Sep-21	2022/9/20 10:55	2022/9/20 10:55		1514		9	13		Pharmaceutics								English							Place: Basel Publisher: Mdpi WOS:000701442000001				covid-19; disease; vaccine; design; drug repositioning; inhibitors; prostate-cancer; statins; tmprss2; UK Biobank
2U6A2XQ9	journalArticle	2021	Nasti, Tahseen H.; Eberhardt, Christiane S.	Vaccination against Cancer or Infectious Agents during Checkpoint Inhibitor Therapy	Vaccines			10.3390/vaccines9121396		The use of immune checkpoint inhibitors (ICI) has substantially increased the overall survival of cancer patients and has revolutionized the therapeutic situation in oncology. However, not all patients and cancer types respond to ICI, or become resistant over time. Combining ICIs with therapeutic cancer vaccines is a promising option as vaccination may help to overcome resistance to immunotherapi…	Dec-21	2022/9/20 10:55	2022/9/20 10:55		1396		12	9		Vaccines								English							Place: Basel Publisher: Mdpi WOS:000737322400001				influenza; safety; prostate-cancer; blockade; cancer vaccines; combination immunotherapy; COVID vaccines; dendritic cell vaccines; dose-escalation; ipilimumab; pd-1; preventive vaccines; t-cells; therapeutic vaccines; trial
8QIAT74C	journalArticle	2021	Stein, Mary Lyn; Park, Raymond S.; Afshari, Arash; Disma, Nicola; Fiadjoe, John E.; Matava, Clyde T.; McNarry, Alistair F.; von Ungern-Sternberg, Britta S.; Kovatsis, Pete G.; Peyton, James M.	Lessons from COVID-19: A reflection on the strengths and weakness of early consensus recommendations for pediatric difficult airway management during a respiratory viral pandemic using a modified Delphi method	Pediatric Anesthesia		1155-5645	10.1111/pan.14272		Background The authors recognized a gap in existing guidelines and convened a modified Delphi process to address novel issues in pediatric difficult airway management raised by the COVID-19 pandemic. Methods The Pediatric Difficult Intubation Collaborative, a working group of the Society for Pediatric Anesthesia, assembled an international panel to reach consensus recommendations on pediatric dif…	Oct-21	2022/9/20 10:55	2022/9/20 10:55		1074-1088		10	31		Pediatr. Anesth.								English							Place: Hoboken Publisher: Wiley WOS:000688452000001				covid-19; pandemic; children; airway management; difficult intubation; intubation; pediatric
WNISPZ4I	journalArticle	2021	Emes, David; Huls, Anke; Baumer, Nicole; Dierssen, Mara; Puri, Shiela; Russell, Lauren; Sherman, Stephanie L.; Strydom, Andre; Bargagna, Stefania; Brandao, Ana Claudia; Costa, Alberto C. S.; Feany, Patrick T.; Chicoine, Brian Allen; Ghosh, Sujay; Rebillat, Anne-Sophie; Sgandurra, Giuseppina; Valentini, Diletta; Rohrer, Tilman R.; Levin, Johannes; Lakhanpaul, Monica	COVID-19 in Children with Down Syndrome: Data from the Trisomy 21 Research Society Survey	Journal of Clinical Medicine			10.3390/jcm10215125		Adults with Down Syndrome (DS) are at higher risk for severe outcomes of coronavirus disease 2019 (COVID-19) than the general population, but evidence is required to understand the risks for children with DS, which is necessary to inform COVID-19 shielding advice and vaccination priorities. We aimed to determine the epidemiological and clinical characteristics of COVID-19 in children with DS. Usi…	Nov-21	2022/9/20 10:55	2022/9/20 10:55		5125		21	10		J. Clin. Med.								English							Place: Basel Publisher: Mdpi WOS:000719459600001				covid-19; vaccination; Down Syndrome; memory b-cells; paediatrics
GVT2CPW7	journalArticle	2021	Roczo-Farkas, Susie; Thomas, Sarah; Donato, Celeste M.; Bogdanovic-Sakran, Nada; Bines, Julie E.	Australian Rotavirus Surveillance Program: Annual Report, 2020	Communicable Diseases Intelligence		0725-3141	10.33321/cdi.2021.45.64		This report from the Australian Rotavirus Surveillance Network describes the circulating rotavirus genotypes identified in children and adults during the period 1 January - 31 December 2020. During this period, 229 faecal specimens were referred for rotavirus G- and P- genotype analysis, including 189 samples that were confirmed as rotavirus positive. Of these, 98/189 were wildtype rotavirus stra…	2021/11/30	2022/9/20 10:55	2022/9/20 10:55					45		Commun. Dis. Intell.								English							Place: Canberra Publisher: Australian Government, Dept Health & Ageing WOS:000725195500001				covid-19; vaccine; identification; genotype; surveillance; diversity; acid; Australia; diagnostic; gastroenteritis; notifiable; polymerase-chain-reaction; Rotarix; rotavirus; strains
CH2DLF46	journalArticle	2022	Augusto, Gilles; Mohsen, Mona O.; Zinkhan, Simon; Liu, Xuelan; Vogel, Monique; Bachmann, Martin F.	In vitro data suggest that Indian delta variant B.1.617 of SARS-CoV-2 escapes neutralization by both receptor affinity and immune evasion	Allergy		0105-4538	10.1111/all.15065		Background Emerged mutations can be attributed to increased transmissibility of the B.1.617 and B.1.36 Indian delta variants of SARS-CoV-2, most notably substitutions L452R/E484Q and N440K, respectively, which occur in the receptor-binding domain (RBD) of the Spike (S) fusion glycoprotein. Objective We aimed to assess the effects of mutations L452R/E484Q and N440K (as well as the previously studi…	Jan-22	2022/9/20 10:55	2022/9/20 10:55		111-117		1	77		Allergy								English							Place: Hoboken Publisher: Wiley WOS:000695502100001				SARS-CoV-2; vaccine; neutralization; rbd; affinity
I2G6DY7F	journalArticle	2021	Lai, Shengjie; Ruktanonchai, Nick W.; Carioli, Alessandra; Ruktanonchai, Corrine W.; Floyd, Jessica R.; Prosper, Olivia; Zhang, Chi; Du, Xiangjun; Yang, Weizhong; Tatem, Andrew J.	Assessing the Effect of Global Travel and Contact Restrictions on Mitigating the COVID-19 Pandemic	Engineering		2095-8099	10.1016/j.eng.2021.03.017		Travel restrictions and physical distancing have been implemented across the world to mitigate the coronavirus disease 2019 (COVID-19) pandemic, but studies are needed to understand their effectiveness across regions and time. Based on the population mobility metrics derived from mobile phone geolocation data across 135 countries or territories during the first wave of the pandemic in 2020, we bu…	Jul-21	2022/9/20 10:55	2022/9/20 10:55		914-923		7	7		Engineering								English							Place: Amsterdam Publisher: Elsevier WOS:000711220200008				covid-19; transmission; influenza; china; Pandemic; wuhan; Physical distancing; Population mobility; Travel restriction
P68EEV94	journalArticle	2021	Jensen, Eric Allen; Pfleger, Axel; Herbig, Lisa; Wagoner, Brady; Lorenz, Lars; Watzlawik, Meike	What Drives Belief in Vaccination Conspiracy Theories in Germany?	Frontiers in Communication			10.3389/fcomm.2021.678335		In the midst of a pandemic, the efficacy of official measures to mitigate the COVID-19 crisis largely depends on public attitudes towards them, where conspiracy beliefs represent potential threats to the efficacy of measures such as vaccination. Here, we present predictors and outcomes associated with a COVID-19 vaccination conspiracy belief. In a representative survey of Germany, sociodemographi…	2021/5/25	2022/9/20 10:55	2022/9/20 10:55		678335			6		Front. Commun.								English							Place: Lausanne Publisher: Frontiers Media Sa WOS:000659090000001				covid-19; vaccination; conspiracy theories; crisis communication; health communciation; mentality; science
T26T2FPA	journalArticle	2021	Buja, Alessandra; Manfredi, Mariagiovanna; De Luca, Giuseppe; Zampieri, Chiara; Zanovello, Sofia; Perkovic, Davor; Scotton, Francesca; Minnicelli, Anil; De Polo, Anna; Cristofori, Vittorio; Biasi, Laura; Baldovin, Tatjana; Bertoncello, Chiara; Cocchio, Silvia; Baldo, Vincenzo	Using Failure Mode, Effect and Criticality Analysis to Improve Safety in the COVID Mass Vaccination Campaign	Vaccines			10.3390/vaccines9080866		Vaccination against SARS-CoV-2 will likely be the most promising way to combat the pandemic. Even if mass vaccination is urgent, it should still always be supported by appropriate patient safety management. The aim of this study, based on failure mode, effects and criticality analysis (FMECA), was to identify possible failures and highlight measures that can be adopted to prevent their occurrence…	Aug-21	2022/9/20 10:55	2022/9/20 10:55		866		8	9		Vaccines								English							Place: Basel Publisher: Mdpi WOS:000689942000001				sars-cov-2; errors; patient safety; proactive management; vaccination campaign
4499JFDR	journalArticle	2021	Lanphier, Elizabeth; Fyfe, Shannon	Pediatric Off-Label Use of Covid-19 Vaccines: Ethical and Legal Considerations	Hastings Center Report		0093-0334	10.1002/hast.1296			Nov-21	2022/9/20 10:55	2022/9/20 10:55		27-32		6	51		Hastings Cent. Rep.								English							Place: Hoboken Publisher: Wiley WOS:000715894400001
EQCKM6X2	journalArticle	2021	Ferranna, Maddalena; Cadarette, Daniel; Bloom, David E.	COVID-19 Vaccine Allocation: Modeling Health Outcomes and Equity Implications of Alternative Strategies	Engineering		2095-8099	10.1016/j.eng.2021.03.014		Given the scarcity of safe and effective COVID-19 vaccines, a chief policy question is how to allocate them among different sociodemographic groups. This paper evaluates COVID-19 vaccine prioritization strategies proposed to date, focusing on their stated goals; the mechanisms through which the selected allocations affect the course and burden of the pandemic; and the main epidemiological, econom…	Jul-21	2022/9/20 10:55	2022/9/20 10:55		924-935		7	7		Engineering								English							Place: Amsterdam Publisher: Elsevier WOS:000711220200009				covid-19; SEIR model; Equity; public-health; Vaccine allocation
NT2BBV78	journalArticle	2021	Lu, Tianchi	K-Nearest Robust Active Learning on Big Data and Application in Epitope Prediction	Wireless Communications & Mobile Computing		1530-8669	10.1155/2021/8752022		B-cells that induce antigen-specific immune responses in vivo produce large numbers of antigen-specific antibodies by recognizing subregions (epitopes) of antigenic proteins, in which they can inhibit the function of antigen protein. Epitope region prediction facilitates the design and development of vaccines that induce the production of antigen-specific antibodies. There are many diseases which…	2021/11/11	2022/9/20 10:55	2022/9/20 10:55		8752022			2021		Wirel. Commun. Mob. Comput.								English							Place: London Publisher: Wiley-Hindawi WOS:000780927500004
VJPZBIB9	journalArticle	2021	Wong, Brian L. H.; Green, Manfred S.; Reid, John; Martin-Moreno, Jose M.; Davidovitch, Nadav; Chambaud, Laurent; Leighton, Lore; Sheek-Hussein, Mohamud; Dhonkal, Ranjeet; Otok, Robert; Middleton, John D.	Toward 'Vaccine Internationalism': The Need for an Equitable and Coordinated Global Vaccination Approach to Effectively Combat COVID-19	International Journal of Public Health		1661-8556	10.3389/ijph.2021.1604077			2021/4/14	2022/9/20 10:55	2022/9/20 10:55		1604077			66		Int. J. Public Health								English							Place: Lausanne Publisher: Frontiers Media Sa WOS:000644701800001				covid-19; vaccination; equity; global governance; global health; policy; vaccine distribution; vaccine policy
7C8LEW37	journalArticle	2021	Bunch, Lauren	A Tale of Two Crises: Addressing Covid-19 Vaccine Hesitancy as Promoting Racial Justice	Hec Forum		0956-2737	10.1007/s10730-021-09440-0		The year 2020 has yielded twin crises in the United States: a global pandemic and a public reckoning with racism brought about by a series of publicized instances of police violence toward Black men and women. Current data indicate that nationally, Black Americans are three times more likely than White Americans to contract Covid-19 (with further variance by state), a pattern that underscores the…	Jun-21	2022/9/20 10:55	2022/9/20 10:55		143-154		1月2日	33		HEC Forum								English							Place: Dordrecht Publisher: Springer WOS:000608932500001				Covid-19; Vaccine hesitancy; Racial disparities; Trust
Q94D4EKM	journalArticle	2022	Wijesinghe, Millawage Supun Dilara; Ariyaratne, Vinya S.; Gunawardana, Balangoda Muhamdiramlage Indika; Rajapaksha, R. M. Nayani Umesha; Weerasinghe, W. M. Prasad Chathuranga; Gomez, Praveen; Chandraratna, Sahani; Suveendran, Thirupathy; Karunapema, R. P. Palitha	Role of Religious Leaders in COVID-19 Prevention: A Community-Level Prevention Model in Sri Lanka	Journal of Religion & Health		0022-4197	10.1007/s10943-021-01463-8		The COVID-19 pandemic has affected all countries irrespective of their state of development. In countries with traditional societies, religious leaders have been acknowledged as key stakeholders in community engagement activities, including disease prevention. A community-level prevention model was established in 2020 by the Health Promotion Bureau (HPB), Sri Lanka, which incorporated mobilisatio…	Feb-22	2022/9/20 10:55	2022/9/20 10:55		687-702		1	61		J. Relig. Health								English							Place: New York Publisher: Springer WOS:000721642900001				covid-19; Public health; Community networks; Community engagement; Community health planning; Community-level prevention model; health-promotion; Religious leaders
WNYXK6KK	journalArticle	2021	Racine-Brzostek, Sabrina E.; Yee, Jim K.; Sukhu, Ashley; Qiu, Yuqing; Rand, Sophie; Barone, Paul D.; Hao, Ying; Yang, He S.; Meng, Qing H.; Apple, Fred S.; Shi, Yuanyuan; Chadburn, Amy; Golden, Encouse; Formenti, Silvia C.; Cushing, Melissa M.; Zhao, Zhen	Rapid, robust, and sustainable antibody responses to mRNA COVID-19 vaccine in convalescent COVID-19 individuals	Jci Insight			10.1172/jci.insight.151477		Longitudinal studies are needed to evaluate the SARS-CoV-2 mRNA vaccine antibody response under real-world conditions. This longitudinal study investigated the quantity and quality of SARS-CoV-2 antibody response in 846 specimens from 350 patients, comparing BNT162b2vaccinated individuals (19 previously diagnosed with COVID-19, termed RecoVax; and 49 never diagnosed, termed NaiveVax) with 122 hos…	2021/10/22	2022/9/20 10:55	2022/9/20 10:55		e151477		20	6		JCI Insight								English							Place: Ann Arbor Publisher: Amer Soc Clinical Investigation Inc WOS:000710669500001
42UZVVU3	journalArticle	2021	Alhazmi, Abdulaziz; Alamer, Edrous; Daws, Dalia; Hakami, Mashael; Darraj, Majid; Abdelwahab, Siddig; Maghfuri, Amani; Algaissi, Abdullah	Evaluation of Side Effects Associated with COVID-19 Vaccines in Saudi Arabia	Vaccines			10.3390/vaccines9060674		Background: Pfizer-BioNTech and Oxford-AstraZeneca are recently introduced vaccines to combat COVID-19 pandemic. During clinical trials, mild to moderate side effects have been associated with these vaccines. Thus, we aimed to evaluate short-term post-vaccination side effects. Methods: Cross-sectional, retrospective study using an online questionnaire was conducted among COVID-19 vaccines recipie…	Jun-21	2022/9/20 10:55	2022/9/20 10:55		674		6	9		Vaccines								English							Place: Basel Publisher: Mdpi WOS:000666960800001				covid-19; SARS-CoV-2; vaccine; side effects
DFJFKEBG	journalArticle	2021	Khurana, Amit; Allawadhi, Prince; Khurana, Isha; Allwadhi, Sachin; Weiskirchen, Ralf; Banothu, Anil Kumar; Chhabra, Deepak; Joshi, Kamaldeep; Bharani, Kala Kumar	Role of nanotechnology behind the success of mRNA vaccines for COVID-19	Nano Today		1748-0132	10.1016/j.nantod.2021.101142		The emergency use authorization (EUA) by the US-FDA for two mRNA-based vaccines BNT162b2 (Pfizer-BioNTech) and mRNA-1273 (Moderna) has brought hope of addressing the COVID-19 pandemic which has killed more than two million people globally. Nanotechnology has played a significant role in the success of these vaccines. Nanoparticles (NPs) aid in improving stability by protecting the encapsulated mR…	Jun-21	2022/9/20 10:55	2022/9/20 10:55		101142			38		Nano Today								English							Place: Oxford Publisher: Elsevier Sci Ltd WOS:000670248100003				covid-19; BNT162b2; mRNA-1273; controlled drug-delivery; in-vivo; Lipid nanoparticles; mRNA; nanomedicine; recognition; sln; solid lipid nanoparticles; suppression; therapeutic applications
2YSN4KSR	journalArticle	2021	Wang, Yaling; Xie, Yuping; Luo, Jia; Guo, Mengyu; Hu, Xuhao; Chen, Xi; Chen, Ziwei; Lu, Xinyi; Mao, Lichun; Zhang, Kai; Wei, Liangnian; Ma, Yunfei; Wang, Ruixin; Zhou, Jia; He, Chunyan; Zhang, Yufang; Zhang, Ye; Chen, Sisi; Shen, Lijuan; Chen, Yun; Qiu, Nasha; Liu, Ying; Cui, Yanyan; Liao, Guoyang; Liu, Ye; Chen, Chunying	Engineering a self-navigated MnARK nanovaccine for inducing potent protective immunity against novel coronavirus	Nano Today		1748-0132	10.1016/j.nantod.2021.101139		Effective vaccines are vital to fight against the COVID-19 global pandemic. As a critical component of a subunit vaccine, the adjuvant is responsible for strengthening the antigen-induced immune responses. Here, we present a new nanovaccine that comprising the Receptor-Binding Domain (RBD) of spike protein and the manganese nanoadjuvant (MnARK), which induces humoral and cellular responses. Notab…	Jun-21	2022/9/20 10:55	2022/9/20 10:55		101139			38		Nano Today								English							Place: Oxford Publisher: Elsevier Sci Ltd WOS:000670248100002				vaccination; cells; defense; dna; pathway
6QFKQ9R3	journalArticle	2021	Narasimha, Prathvi Thumbe; Jena, Pradyot Ranjan; Majhi, Ritanjali	Impact of COVID-19 on the Indian seaport transportation and maritime supply chain	Transport Policy		0967-070X	10.1016/j.tranpol.2021.05.011		Impacts of COVID-19 in maritime transportation and its related policy measures have been investigated by more and more organizations and researchers across the world. This paper aims to examine the impacts of COVID-19 on seaport transportation and the maritime supply chain field and its related issues in India. Secondary data are used to analyze the performance indicators of major seaports in Ind…	Sep-21	2022/9/20 10:55	2022/9/20 10:55		191-203			110		Transp. Policy								English							Place: Oxford Publisher: Elsevier Sci Ltd WOS:000679368900004				covid-19; India; Maritime; Seaports; Stakeholders; Supply chain; Sustainability
TRZT3Y8L	journalArticle	2021	Walti, Carla S.; Loes, Andrea N.; Shuey, Kiel; Krantz, Elizabeth M.; Boonyaratanakornkit, Jim; Keane-Candib, Jacob; Loeffelholz, Tillie; Wolf, Caitlin R.; Taylor, Justin J.; Gardner, Rebecca A.; Green, Damian J.; Cowan, Andrew J.; Maloney, David G.; Turtle, Cameron J.; Pergam, Steven A.; Chu, Helen Y.; Bloom, Jesse D.; Hill, Joshua A.	Humoral immunogenicity of the seasonal influenza vaccine before and after CAR-T-cell therapy: a prospective observational study	Journal for Immunotherapy of Cancer			10.1136/jitc-2021-003428		Recipients of chimeric antigen receptor-modified T (CAR-T) cell therapies for B cell malignancies have profound and prolonged immunodeficiencies and are at risk for serious infections, including respiratory virus infections. Vaccination may be important for infection prevention, but there are limited data on vaccine immunogenicity in this population. We conducted a prospective observational study…	Oct-21	2022/9/20 10:55	2022/9/20 10:55		e003428		10	9		J. Immunother. Cancer								English							Place: London Publisher: Bmj Publishing Group WOS:000711981900003				vaccine; immunity; immunogenicity; antibody formation; antigen; chimeric antigen; hematologic neoplasms; humoral; infectious complications; receptors
QY2Q93JS	journalArticle	2021	Mou, Kejie; Mukhtar, Farwa; Khan, Muhammad Tahir; Darwish, Doaa B.; Peng, Shaoliang; Muhammad, Shabbir; Al-Sehemi, Abdullah G.; Wei, Dong-Qing	Emerging Mutations in Nsp1 of SARS-CoV-2 and Their Effect on the Structural Stability	Pathogens			10.3390/pathogens10101285		The genome of severe acute respiratory syndrome coronavirus 2 (SARS-CoV-2) encodes 16 non-structural (Nsp) and 4 structural proteins. Among the Nsps, Nsp1 inhibits host gene expression and also evades the immune system. This protein has been proposed as a target for vaccine development and also for drug design. Owing to its important role, the current study aimed to identify mutations in Nsp1 and…	Oct-21	2022/9/20 10:55	2022/9/20 10:55		1285		10	10		Pathogens								English							Place: Basel Publisher: Mdpi WOS:000717082600001				SARS-CoV-2; binding; mutations; protein; genome; host gene-expression; i interferon; Nsp1
FQA7LBM5	journalArticle	2022	Gesualdo, Francesco; Bucci, Lucie M.; Rizzo, Caterina; Tozzi, Alberto E.	Digital tools, multidisciplinarity and innovation for communicating vaccine safety in the COVID-19 era	Human Vaccines & Immunotherapeutics		2164-5515	10.1080/21645515.2020.1865048		The research on the anti-SARS-CoV-2 vaccines and their commercialization is an opportunity to test and consolidate the current knowledge along with the diverse available tools related to vaccine communication. In this paper we explore the value of a multidisciplinary approach in this field: vaccine communication activities can be combined with insights from data science, risk communication, behav…	2022/12/31	2022/9/20 10:55	2022/9/20 10:55				1	18		Human Vaccines Immunother.								English							Place: Philadelphia Publisher: Taylor & Francis Inc WOS:000632715500001				vaccine safety; human-centered design; infodemic; innovation; social media listening; Vaccine communication; vaccine safety net
A6RD3A8W	journalArticle		Balidis, Miltiadis; Mikropoulos, Dimitrios; Gatzioufas, Zisis; de Politis, Penelope B.; Sidiropoulos, Georgios; Vassiliadis, Vassilios	Acute corneal graft rejection after anti-severe acute respiratory syndrome-coronavirus-2 vaccination: A report of four cases	European Journal of Ophthalmology		1120-6721	10.1177/11206721211064033		Purpose This study intends to add to previous reports on acute corneal graft rejection following anti-severe acute respiratory syndrome-coronavirus-2 vaccination, providing data to corroborate a possible causative relationship between anti-COVID-19 immunization and corneal graft rejection, regardless of vaccine or graft type. Methods and Results This report describes 4 cases of acute-onset reject…		2022/9/20 10:55	2022/9/20 10:55		1.12067E+16					Eur. J. Ophthalmol.								English							Place: London Publisher: Sage Publications Ltd WOS:000726639800001				covid-19; vaccination; anti-severe acute respiratory syndrome-coronavirus-2; Cornea; graft; rejection
N6G4YA7B	journalArticle	2021	Wu, Jian; Li, Quanman; Silver Tarimo, Clifford; Wang, Meiyun; Gu, Jianqin; Wei, Wei; Ma, Mingze; Zhao, Lipei; Mu, Zihan; Miao, Yudong	COVID-19 Vaccine Hesitancy Among Chinese Population: A Large-Scale National Study	Frontiers in Immunology		1664-3224	10.3389/fimmu.2021.781161		Globally, vaccine hesitancy is a growing public health problem. It is detrimental to the consolidation of immunization program achievements and elimination of vaccine-targeted diseases. The objective of this study was to estimate the prevalence of COVID-19 vaccine hesitancy in China and explore its contributing factors. A national cross-sectional online survey among Chinese adults (>= 18 years ol…	2021/11/29	2022/9/20 10:55	2022/9/20 10:55		781161			12		Front. Immunol.								English							Place: Lausanne Publisher: Frontiers Media Sa WOS:000732735600001				health; risk; China; booster vaccination; contextual factors); COVID-19 vaccine hesitancy; factors (individual factors; primary vaccination
VDX5Q353	journalArticle	2021	Yu, Xiang; Li, Na; Dong, Yupeng	Observation on China's Strategies to Prevent the Resurgence of the COVID-19 Epidemic	Risk Management and Healthcare Policy			10.2147/RMHP.S305413		After the first wave of the COVID-19 pandemic that began in early 2020 was brought under control, there have been some regional and small-scale cases of new infections in China. In order to prevent the resurgence of the epidemic, the Chinese government has continued the use of effective prevention and control measures in key epidemic areas. New prevention and control measures have also been devel…	2021	2022/9/20 10:55	2022/9/20 10:55		2011-2019			14		RISK MANAG. HEALTHC. POLICY								English							Place: Albany Publisher: Dove Medical Press Ltd WOS:000655702100001				covid-19; coronavirus; collaboration; health information; risk management; virus test
FMV2YL6Z	journalArticle		Espindola, Juan; Vaca, Moises	On the morality of vaccination tourism	Bioethics		0269-9702	10.1111/bioe.12950		Vaccination tourism (whereby citizens of one nation travel to a different, usually more developed nation to receive a vaccine unavailable or with little availability at home) during the COVID pandemic raises a host of moral issues and is usually met with criticism. From the perspective of the society of origin, the criticism is that those who use their socio-economic privileges to go abroad and r…		2022/9/20 10:55	2022/9/20 10:55							Bioethics								English							Place: Hoboken Publisher: Wiley WOS:000696337700001				covid-19; priority; equality; global justice; levelling down objection; solidarity; vaccination tourism
TJ8IDMQC	journalArticle	2021	Zheng, Bin; Peng, Wenchang; Guo, Mingming; Huang, Mengqian; Gu, Yuxuan; Wang, Tao; Ni, Guangjian; Ming, Dong	Inhalable nanovaccine with biomimetic coronavirus structure to trigger mucosal immunity of respiratory tract against COVID-19	Chemical Engineering Journal		1385-8947	10.1016/j.cej.2021.129392		The COVID-19 pandemic caused by SARS-CoV-2 seriously threatens global public health. It has previously been confirmed that SARS-CoV-2 is mainly transmitted between people through "respiratory droplets". Therefore, the respiratory tract mucosa is the first barrier to prevent virus invasion. It is very important to stimulate mucosal immunity to protect the body from respiratory virus infection. Ins…	2021/8/15	2022/9/20 10:55	2022/9/20 10:55		129392			418		Chem. Eng. J.								English							Place: Lausanne Publisher: Elsevier Science Sa WOS:000655660700003				covid-19; SARS-CoV-2; united-states; progress; induction; sars; Bionic coronavirus structure; delivery; Inhalable nanovaccine; Respiratory mucosal immunity; rna-based vaccines
37YQEMU8	journalArticle	2021	Russo, Rocco; Bozzola, Elena; Palma, Paolo; Corsello, Giovanni; Villani, Alberto	Pediatric routine vaccinations in the COVID 19 lockdown period: the survey of the Italian Pediatric Society	Italian Journal of Pediatrics		1720-8424	10.1186/s13052-021-01023-6		Background COVID-19 pandemic was responsible for disrupting routine immunization activities all over the world. Aim of the study was to investigate the reduced adherence to the national children vaccination schedule during the lockdown period in Italy. Materials and methods Through social channels, the Italian Pediatric Society conducted a survey among Italian families on children vaccination dur…	2021/3/24	2022/9/20 10:55	2022/9/20 10:55		72		1	47		Ital. J. Pediatr.								English							Place: London Publisher: Bmc WOS:000634831200002				covid; Immunization; Children; Vaccine
NFNFSLZI	journalArticle	2021	Zhai, Shidong; Luo, Guoqiang; Huang, Tao; Wang, Xin; Tao, Junli; Zhou, Ping	Vaccination control of an epidemic model with time delay and its application to COVID-19	Nonlinear Dynamics		0924-090X	10.1007/s11071-021-06533-w		This paper studies an SEIR-type epidemic model with time delay and vaccination control. The vaccination control is applied when the basic reproduction number R-0 > 1. The vaccination strategy is expressed as a state delayed feedback which is related to the current and previous state of the epidemic model, and makes the model become a linear system in new coordinates. For the presence and absence …	Oct-21	2022/9/20 10:55	2022/9/20 10:55		1279-1292		2	106		Nonlinear Dyn.								English							Place: Dordrecht Publisher: Springer WOS:000655807400001				Vaccination; china; dynamics; seir; Epidemic model; impulsive vaccination; pulse vaccination; State delayed feedback; Time delay
GWIHJA3F	journalArticle	2021	Moremada, Charuka; Sandeepa, Chamara; Dissanayaka, Nadeeka; Gamage, Tharindu; Liyanage, Madhusanka	Energy Efficient Contact Tracing and Social Interaction based Patient Prediction System for COVID-19 Pandemic	Journal of Communications and Networks		1229-2370	10.23919/JCN.2021.000037		to the spread of Coronavirus disease 2019 (COVID-19), the world has encountered an ongoing pandemic to date. It is a highly contagious disease. In addition to the vaccination, social distancing and isolation of patients are proven to be one of the commonly used strategies to reduce the spread of disease. For efficient social distancing, contact tracing is a critical requirement in the incubation …	Oct-21	2022/9/20 10:55	2022/9/20 10:55		390-407		5	23		J. Commun. Netw.								English							Place: Seoul Publisher: Korean Inst Communications Sciences (k I C S) WOS:000716438900007				covid-19; SARS-CoV-2; Blutooth Low Energy; contact trac-ing algorithm; energy efficiency; infection prediction; Internet of things; social interaction tracing
WWNSPHRG	journalArticle	2021	Nguyen, Van Tap; Nguyen, Minh Quan; Le, Ngoc Thi; Nguyen, Thi Ngoc Han; Huynh, Giao	Predictors of Intention to Get a COVID-19 Vaccine of Health Science Students: A Cross-Sectional Study	Risk Management and Healthcare Policy			10.2147/RMHP.S328665		Background: Vaccination is one of the interventions that can be employed to control coronavirus disease (COVID-19). The aim of this study is to identify factors that affect vaccination intention among health science students, by using the health belief model (HBM) as a theoretical framework. Methods: This study was undertaken in April 2021 using a convenience sample strategy among health science …	2021	2022/9/20 10:55	2022/9/20 10:55		4023-4030			14		RISK MANAG. HEALTHC. POLICY								English							Place: Albany Publisher: Dove Medical Press Ltd WOS:000703445500006				COVID-19 vaccine; intention; knowledge; chi minh city; Vietnam; health science; student
VBQKE5P9	journalArticle	2021	Barreiro, N. L.; Govezensky, T.; Bolcatto, P. G.; Barrio, R. A.	Detecting infected asymptomatic cases in a stochastic model for spread of Covid-19: the case of Argentina	Scientific Reports		2045-2322	10.1038/s41598-021-89517-5		We have studied the dynamic evolution of the Covid-19 pandemic in Argentina. The marked heterogeneity in population density and the very extensive geography of the country becomes a challenge itself. Standard compartment models fail when they are implemented in the Argentina case. We extended a previous successful model to describe the geographical spread of the AH1N1 influenza epidemic of 2009 i…	2021/5/11	2022/9/20 10:55	2022/9/20 10:55		10024		1	11		Sci Rep								English							Place: Berlin Publisher: Nature Portfolio WOS:000658810900033				quarantine
JI5JR8UH	journalArticle	2021	Islam, S. M. Didar-Ul; Mondal, Prantor Kumar; Ojong, Nathanael; Bodrud-Doza, Md; Siddique, Md Abu Bakar; Hossain, Moazzem; Mamun, Mohammed A.	Water, sanitation, hygiene and waste disposal practices as COVID-19 response strategy: insights from Bangladesh	Environment Development and Sustainability		1387-585X	10.1007/s10668-020-01151-9		The COVID-19 pandemic has caused a global emergence, and the absence of a proven vaccine or medicine has led to the implementation of measures to prevent and control the spread of the virus. Wearing protective equipment like mask and gloves, washing hands via soap, frequent use of antiseptic solution and maintaining social distance are being applied globally to reduce the transmission rate. There…	Aug-21	2022/9/20 10:55	2022/9/20 10:55		11953-11974		8	23		Environ. Dev. Sustain.								English							Place: Dordrecht Publisher: Springer WOS:000604170500003				Public health; COVID-19 pandemic; area; child health; dhaka city; Environmental pollution; gis; Waste disposal; Water sanitation hygiene (WASH)
724WK45M	journalArticle	2021	Bordoloi, Devivasha; Xu, Ziyang; Ho, Michelle; Purwar, Mansi; Bhojnagarwala, Pratik; Cassel, Joel; Giron, Leila B.; Walker, Susanne; Kulkarni, Abhijeet J.; Ruiz, Edgar Tello; Choi, Jihae; Zaidi, Faraz; Wu, Yuanhan; Wang, Shaoying; Patel, Ami; Ramos, Stephanie; Smith, Trevor; Kulp, Daniel; Ugen, Kenneth E.; Srinivasan, Alagarsamy; Abdel-Mohsen, Mohamed; Humeau, Laurent; Weiner, David B.; Muthumani…	Identification of Novel Neutralizing Monoclonal Antibodies against SARS-CoV-2 Spike Glycoprotein	Acs Pharmacology & Translational Science			10.1021/acsptsci.1c00058		Coronavirus disease 2019 (COVID-19) is caused by the newly emerged human coronavirus, severe acute respiratory syndrome coronavirus 2 (SARS-CoV-2). Due to the highly contagious nature of SARS-CoV-2, it has infected more than 137 million individuals and caused more than 2.9 million deaths globally as of April 13, 2021. There is an urgent need to develop effective novel therapeutic strategies to tr…	2021/8/13	2022/9/20 10:55	2022/9/20 10:55		1349-1361		4	4		ACS Pharmacol. Transl. Sci.								English							Place: Washington Publisher: Amer Chemical Soc WOS:000686103400010				covid-19; affinity; adcc; dependent cellular cytotoxicity; effector functions; glycoforms; increase; mAbs; neutralizing antibodies; SARS-CoV-2/Spike/RBD; synthetic DNA
ETHI9G8N	journalArticle	2021	Schmidt, Tina; Klemis, Verena; Schub, David; Schneitler, Sophie; Reichert, Matthias C.; Wilkens, Heinrike; Sester, Urban; Sester, Martina; Mihm, Janine	Cellular immunity predominates over humoral immunity after homologous and heterologous mRNA and vector-based COVID-19 vaccine regimens in solid organ transplant recipients	American Journal of Transplantation		1600-6135	10.1111/ajt.16818		Knowledge on the immunogenicity of vector-based and mRNA-vaccines in solid organ transplant recipients is limited. Therefore, SARS-CoV-2-specific T cells and antibodies were analyzed in 40 transplant recipients and 70 controls after homologous or heterologous vaccine-regimens. Plasmablasts and SARS-CoV-2-specific CD4 and CD8 T cells were quantified using flow cytometry. Specific antibodies were a…	Dec-21	2022/9/20 10:55	2022/9/20 10:55		3990-4002		12	21		Am. J. Transplant.								English							Place: Hoboken Publisher: Wiley WOS:000692727200001				vaccine; clinical research; flow cytometry; infection and infectious agents; infectious disease; practice; T cell biology; viral
XM7UXWSL	journalArticle	2021	Gabutti, Giovanni; d'Anchera, Erica; De Motoli, Francesco; Savio, Marta; Stefanati, Armando	Human Papilloma Virus Vaccination: Focus on the Italian Situation	Vaccines			10.3390/vaccines9121374		Human papilloma virus (HPV) is a viral agent whose transmission occurs mainly by sexual means. It causes different pathological conditions in both males and females, ranging from benign pathologies up to cancers. The introduction of vaccination has certainly had a major impact in terms of reducing the incidence of both HPV infections and diseases but in the European Union and the European Economi…	Dec-21	2022/9/20 10:55	2022/9/20 10:55		1374		12	9		Vaccines								English							Place: Basel Publisher: Mdpi WOS:000737277000001				covid-19; vaccines; adolescents; cervical cancer; genital warts; hpv; HPV vaccination; infectious diseases; papilloma virus
4QR46ZLK	journalArticle	2021	Song, Jinzhao; El-Tholoth, Mohamed; Li, Yize; Graham-Wooten, Jevon; Liang, Yining; Li, Juan; Li, Weijian; Weiss, Susan R.; Collman, Ronald G.; Bau, Haim H.	Single- and Two-Stage, Closed-Tube, Point-of-Care, Molecular Detection of SARS-CoV-2	Analytical Chemistry		0003-2700	10.1021/acs.analchem.1c03016		Short of a vaccine, frequent and rapid testing, preferably at home, is the most effective strategy to contain the COVID-19 pandemic. Herein, we report on single-stage and two-stage molecular diagnostic tests that can be carried out with simple or no instrumentation. Our single-stage amplification is reverse transcription-loop mediated isothermal amplification (RT-LAMP) with custom-designed primer…	2021/9/28	2022/9/20 10:55	2022/9/20 10:55		13063-13071		38	93		Anal. Chem.								English							Place: Washington Publisher: Amer Chemical Soc WOS:000703526400033				epidemiology; 229e; amplification; hku1; nl63; oc43
GXWVHI93	journalArticle	2021	Mathew, Carol; Zumberg, Marc	Clots in unusual places: lots of stress, limited data, critical decisions	Hematology-American Society of Hematology Education Program		1520-4391	10.1182/hematology.2021000237		Although much less common than deep vein thrombosis of the lower extremities or lungs, clots in unusual locations, including the splanchnic, cerebral, retinal, upper-extremity, and renal locations, present with significant morbidity and mortality. In the last 2 decades, treatment of clots in these unusual locations is primarily managed medically, with interventional and surgical approaches reserv…	2021/12/10	2022/9/20 10:55	2022/9/20 10:55		92-99		1			Hematol.-Am. Soc. Hematol. Educ. Program								English							Place: Washington Publisher: Amer Soc Hematology WOS:000731207900013				diagnosis; anticoagulation; cerebral venous thrombosis; long-term outcomes; molecular-weight heparin; splanchnic vein-thrombosis; thrombolysis
X8PH4D4G	journalArticle	2021	Miotto, Mattia; Di Rienzo, Lorenzo; Bo, Leonardo; Boffi, Alberto; Ruocco, Giancarlo; Milanetti, Edoardo	Molecular Mechanisms Behind Anti SARS-CoV-2 Action of Lactoferrin	Frontiers in Molecular Biosciences			10.3389/fmolb.2021.607443		Despite the huge effort to contain the infection, the novel SARS-CoV-2 coronavirus has rapidly become pandemic, mainly due to its extremely high human-to-human transmission capability, and a surprisingly high viral charge of symptom-less people. While the seek for a vaccine is still ongoing, promising results have been obtained with antiviral compounds. In particular, lactoferrin is regarded to h…	2021/2/15	2022/9/20 10:55	2022/9/20 10:55		607443			8		Front. Mol. Biosci.								English							Place: Lausanne Publisher: Frontiers Media Sa WOS:000623215100001				SARS-CoV-2; coronavirus; receptor; inhibition; binding; bovine lactoferrin; human cytomegalovirus; human-immunodeficiency-virus; lactoferrin; molecular dynamics simulation; protein-structure; shape complementarity; sialic acid; sialic-acid; spike (S) glycoprotein; spike glycoprotein
MMCM9SYN	journalArticle	2021	May, Jori E.; Moll, Stephan	Unexplained arterial thrombosis: approach to diagnosis and treatment	Hematology-American Society of Hematology Education Program		1520-4391	10.1182/hematology.2021000235		Arterial thrombotic events in younger patients without a readily apparent etiology present significant diagnostic and management challenges. We present a structured approach to diagnosis with consideration of common causes, including atherosclerosis and embolism, as well as uncommon causes, including medications and substances, vascular and anatomic abnormalities, systemic disorders, and thrombop…	2021/12/10	2022/9/20 10:55	2022/9/20 10:55		76-84		1			Hematol.-Am. Soc. Hematol. Educ. Program								English							Place: Washington Publisher: Amer Soc Hematology WOS:000731207900011				prevention; management; american-college; guideline; myocardial-infarction; patent foramen ovale; stroke; task-force; therapy; undetermined source
X8PC9LFA	journalArticle	2021	Kouamou, Vinie; Matarise, Richard; Dos Santos, Elizabeth; Elose, Nyasha; Manasa, Justen	SARS-CoV-2 in Zimbabwe: milestones and challenges faced towards achieving the expected 60% herd immunity	Pan African Medical Journal			10.11604/pamj.2021.39.255.30331		In response to COVID-19 pandemic, the Zimbabwe government put in place various rigorous measures to curb the spread of the virus. Although roll-out and access to COVID-19 vaccines in Africa have been slow, the World Health Organization (WHO)-led COVID-19 Vaccines Global Access (COVAX) consortium and the African vaccine acquisition task team are striving to provide 720 million doses of COVID-19 va…	2021/8/20	2022/9/20 10:55	2022/9/20 10:55		255			39		Pan Afr. Med. J.								English							Place: Kampala Publisher: African Field Epidemiology Network-Afenet WOS:000721732800004				covid-19; Vaccine; Zimbabwe
RFXLT65W	journalArticle	2021	Chung, Jae-Ho; Sohn, Sung-Min; Yoo, Hyun-Joon; Yoon, Eul-Sik; Park, Seung-Ha	Transient lower extremity lymphedema following COVID-19 vaccination A case report	Medicine		0025-7974	10.1097/MD.0000000000028092		Rationale: Complications from COVID-19 vaccines have yet to be sufficiently analyzed because they are rapidly approved without long-term data. In particular, there are no case reports of lymphedema in a healthy patient following vaccination. Herein, we report a patient who underwent transient lymphedema after vaccination with BNT16b2. Patient concerns: A 79-year-old woman with pitting edema in bo…	2021/12/3	2022/9/20 10:55	2022/9/20 10:55		e28092		48	100		Medicine (Baltimore)								English							Place: Philadelphia Publisher: Lippincott Williams & Wilkins WOS:000725722600047				covid-19; vaccination; lymphedema
GW822234	journalArticle	2021	Wells, Joshua; Grant, Robert; Chang, John; Kayyali, Reem	Evaluating the usability and acceptability of a geographical information system (GIS) prototype to visualise socio-economic and public health data	Bmc Public Health			10.1186/s12889-021-12072-1		Background Understanding the impact of socio-economic inequality on health outcomes is arguably more relevant than ever before given the global repercussions of Covid-19. With limited resources, innovative methods to track disease, population needs, and current health and social service provision are essential. To best make use of currently available data, there is an increasing reliance on techn…	2021/11/24	2022/9/20 10:55	2022/9/20 10:55		2151		1	21		BMC Public Health								English							Place: London Publisher: Bmc WOS:000722224800010				acceptance; science; aging population; burden; hospital readmission; Mapping; nhs; Prevention; Public health data; sus; technology; Technology; uk; Usability
L374RW8M	journalArticle	2021	Dong, Xuefang; Chen, Cheng; Yan, Jingyu; Zhang, Xiaofei; Li, Xiuling; Liang, Xinmiao	Comprehensive O-Glycosylation Analysis of the SARS-CoV-2 Spike Protein with Biomimetic Trp-Arg Materials	Analytical Chemistry		0003-2700	10.1021/acs.analchem.0c04634		The COVID-19 pandemic caused by severe acute respiratory syndrome coronavirus-2 (SARS-CoV-2) is a serious public health threat. Most vaccines against SARS-CoV-2 target the highly glycosylated spike protein (S). A good knowledge of the glycosylation profile of this protein is key to successful vaccine development. Unlike the 22 confirmed N-glycosylation sites on SARS-CoV-2 S, only a few O-glycosyl…	2021/8/3	2022/9/20 10:55	2022/9/20 10:55		10444-10452		30	93		Anal. Chem.								English							Place: Washington Publisher: Amer Chemical Soc WOS:000683353300009				carbohydrate; envelope; lectins
2C5TINYU	journalArticle	2021	Polyiam, Kanokporn; Phoolcharoen, Waranyoo; Butkhot, Namphueng; Srisaowakarn, Chanya; Thitithanyanont, Arunee; Auewarakul, Prasert; Hoonsuwan, Tawatchai; Ruengjitchatchawalya, Marasri; Mekvichitsaeng, Phenjun; Roshorm, Yaowaluck Maprang	Immunodominant linear B cell epitopes in the spike and membrane proteins of SARS-CoV-2 identified by immunoinformatics prediction and immunoassay	Scientific Reports		2045-2322	10.1038/s41598-021-99642-w		SARS-CoV-2 continues to infect an ever-expanding number of people, resulting in an increase in the number of deaths globally. With the emergence of new variants, there is a corresponding decrease in the currently available vaccine efficacy, highlighting the need for greater insights into the viral epitope profile for both vaccine design and assessment. In this study, three immunodominant linear B…	2021/10/14	2022/9/20 10:55	2022/9/20 10:55		20383		1	11		Sci Rep								English							Place: Berlin Publisher: Nature Portfolio WOS:000707419500010				coronavirus; antibody; 2019-ncov; variant p.1
BRXMJKNB	journalArticle	2021	Li, Lu; Wang, Jian; Nicholas, Stephen; Maitland, Elizabeth; Leng, Anli; Liu, Rugang	The Intention to Receive the COVID-19 Vaccine in China: Insights from Protection Motivation Theory	Vaccines			10.3390/vaccines9050445		(1) Background: More coronavirus disease 2019 (COVID-19) vaccines are gradually being developed and marketed. Improving the vaccination intention will be the key to increasing the vaccination rate in the future; (2) Methods: A self-designed questionnaire was used to collect data on COVID-19 vaccination intentions, protection motivation and control variables. Pearson Chi-square test and multivaria…	May-21	2022/9/20 10:55	2022/9/20 10:55		445		5	9		Vaccines								English							Place: Basel Publisher: Mdpi WOS:000654569000001				covid-19; acceptance; vaccination; intention; protection motivation theory; adolescents; acceptability; determinant; hepatitis-b-vaccine; migrant workers
DMB65QH2	journalArticle	2021	Emanuel, Ezekiel J.; Boyle, Connor W.	Assessment of Length and Readability of Informed Consent Documents for COVID-19 Vaccine Trials	Jama Network Open		2574-3805	10.1001/jamanetworkopen.2021.10843		Importance Informed consent is a fundamental element of research ethics. The COVID-19 vaccine trials are high profile trials that have enrolled more than 100 000 participants. Consent documents must be succinct and understandable to ensure informed voluntary participation. Objective To assess how well informed consent documents of the COVID-19 vaccine trials achieve the ideal of being succinct an…	2021/4/28	2022/9/20 10:55	2022/9/20 10:55		e2110843		4	4		JAMA Netw. Open								English							Place: Chicago Publisher: Amer Medical Assoc WOS:000645614000007
PU2FC5YI	journalArticle	2021	Gonullu, Erdem; Soysal, Ahmet; Atici, Serkan; Engin, Mesut; Yesilbas, Osman; Kasap, Tuba; Fedakar, Atiye; Bilgic, Emre; Tavil, Emine Betul; Tutak, Ercan; Yildiz, Ismail; Akcay, Teoman; Agladioglu, Sebahat Yilmaz; Tunc, Turan; Can, Ilkay; Karabocuoglu, Metin; Karabayir, Nalan	Pediatricians' COVID-19 experiences and views on the willingness to receive COVID-19 vaccines: a cross-sectional survey in Turkey	Human Vaccines & Immunotherapeutics		2164-5515	10.1080/21645515.2021.1896319		Developing an effective and safe vaccine against Covid-19 will facilitate return to normal. Due to hesitation toward the vaccine, it is crucial to explore the acceptability of the COVID-19 vaccine to the public and healthcare workers. In this cross-sectional survey, we invited 2251 pediatricians and 506 (22%) of them responded survey and 424 (84%) gave either nasopharyngeal swap or antibody assay…	2021/8/3	2022/9/20 10:55	2022/9/20 10:55		2389-2396		8	17		Human Vaccines Immunother.								English							Place: Philadelphia Publisher: Taylor & Francis Inc WOS:000641347700001				covid-19; influenza vaccination; vaccine acceptance; knowledge; healthcare workers; pediatricians; Turkey; vaccine hesitancy
SL9N2Z8W	journalArticle	2021	Syan, Sabrina K.; Gohari, Mahmood R.; Levitt, Emily E.; Belisario, Kyla; Gillard, Jessica; DeJesus, Jane; MacKillop, James	COVID-19 Vaccine Perceptions and Differences by Sex, Age, and Education in 1,367 Community Adults in Ontario	Frontiers in Public Health			10.3389/fpubh.2021.719665		Background: COVID-19 is a global pandemic and vaccination efforts may be impeded by vaccine hesitancy. The present study examined willingness to receive a COVID-19 vaccine, the associated reasons for willingness/unwillingness, and vaccine safety perceptions in a cross-sectional assessment of community adults in Ontario. Methods: One thousand three hundred sixty seven individuals (60.6% female, me…	2021/9/22	2022/9/20 10:55	2022/9/20 10:55		719665			9		Front. Public Health								English							Place: Lausanne Publisher: Frontiers Media Sa WOS:000704126600001				covid-19; vaccine; willingness; hesitancy; pandemic; attitudes; receive; time-preferences
P5TIVCNS	journalArticle	2021	Saibene, Alberto Maria; Allevi, Fabiana; Ayad, Tareck; Baudoin, Tomislav; Bernal-Sprekelsen, Manuel; Briganti, Giovanni; Carrie, Sean; Caye-Thomasen, Per; Dahman Saidi, Sara; Dauby, Nicolas; Fenton, John; Golusinski, Wojciech; Klimek, Ludger; Leclerc, Andree-Anne; Longtin, Yves; Mannelli, Giuditta; Mayo-Yanez, Miguel; Meco, Cem; Metwaly, Osama; Mouawad, Francois; Niemczyk, Kazimierz; Pedersen, Ul…	Appropriateness for SARS-CoV-2 vaccination for otolaryngologist and head and neck surgeons in case of pregnancy, breastfeeding, or childbearing potential: Yo-IFOS and CEORL-HNS joint clinical consensus statement	European Archives of Oto-Rhino-Laryngology		0937-4477	10.1007/s00405-021-06794-6		Purpose SARS-CoV-2 vaccines are a key step in fighting the pandemic. Nevertheless, their rapid development did not allow for testing among specific population subgroups such as pregnant and breastfeeding women, or elaborating specific guidelines for healthcare personnel working in high infection risk specialties, such as otolaryngology (ORL). This clinical consensus statement (CCS) aims to offer …	Oct-21	2022/9/20 10:55	2022/9/20 10:55		4091-4099		10	278		Eur. Arch. Oto-Rhino-Laryn.								English							Place: New York Publisher: Springer WOS:000640145700001				covid-19; Coronavirus infections; coronavirus; Covid-19; vaccines; Vaccine; infection; Breastfeeding; Health planning guidelines; Healthcare workers; Pregnancy
CUFVSFTJ	journalArticle	2022	Sacconi, Riccardo; Simona, Filippo; Forte, Paolo; Querques, Giuseppe	Retinal Vein Occlusion Following Two Doses of mRNA-1237 (Moderna) Immunization for SARS-Cov-2: A Case Report	Ophthalmology and Therapy		2193-8245	10.1007/s40123-021-00441-3		Introduction Published data on possible ocular adverse events potentially associated with vaccination with the SARS-Cov-2 mRNA-1237 vaccine are scarce. In this report, we describe the case of a patient who had a hemispheric retinal vein occlusion potentially associated with being vaccinated with the second dose of the SARS-Cov-2 mRNA-1237 vaccine. Methods Case report including a discussion on mul…	Feb-22	2022/9/20 10:55	2022/9/20 10:55		453-458		1	11		OPHTHALMOL. THER.								English							Place: Cham Publisher: Springer Int Publ Ag WOS:000728777400001				diagnosis; covid; Vaccination; Retinal vein occlusion; rvo
IK7VWBVA	journalArticle	2021	Yamaguchi, Yoshitaka; Kimihira, Luna; Nagasawa, Hikaru; Seo, Kyoichi; Wada, Manabu	Cerebral Venous Sinus Thrombosis After BNT162b2 mRNA COVID-19 Vaccination	Cureus			10.7759/cureus.18775		W present a rare case of cerebral venous sinus thrombosis after the BNT162b2 mRNA COVID-19 vaccine. A 61-year-old Japanese man developed a headache 10 days after the first dose of the vaccine. Magnetic resonance venography and contrast-enhanced brain MRI showed thrombosis in the superior sagittal sinus and the right transverse sinus. Anticoagulation with intravenous unfractionated heparin followe…	2021/10/14	2022/9/20 10:55	2022/9/20 10:55		e18775		10	13		Cureus								English							Place: Palo Alto Publisher: Cureus Inc WOS:000708173900019				covid-19; cerebral venous sinus thrombosis (cvst); contrast enhanced magnetic resonance imaging (cemri); magnetic resonance venography; mrna vaccine
HDXVA9P7	journalArticle	2021	Olmedo Luceron, Carmen; Limia Sanchez, Aurora; Garcia Gomez, Montserrat	Vaccination against COVID-19 in working groups	Revista Espanola De Salud Publica		1135-5727			The Spanish Vaccination Strategy against COVID-19 has been prepared by a multidisciplinary Technical Working Group. It has considered the situation of the different socio-occupational groups against COVID-19, having assessed the criteria of risk of exposure, transmission, serious illness and death, negative social and economic impact, feasibility and acceptability of vaccination, in addition to t…	2021/10/22	2022/9/20 10:55	2022/9/20 10:55		e202110121			95		Rev. Esp. Salud Publica								English							Place: Madrid Publisher: Ministerio De Sanidad Y Consumo WOS:000736958300001				SARS-CoV-2; Occupational groups; Occupational health; Program of risk prevention on working environment; Vaccination strategies
LXQUFJC5	journalArticle	2021	Atiyat, Raed; Elias, Samir; Kiwan, Chrystina; Shaaban, Hamid S.; Slim, Jihad	Varicella-Zoster Virus Reactivation in AIDS Patient After Pfizer-BioNTech COVID-19 Vaccine	Cureus			10.7759/cureus.20145		Since early 2020, severe acute respiratory syndrome coronavirus 2 (SARS-CoV-2) has affected millions of individuals and changed the face of medicine. As the fight against COVID continues, there is still unclear long term effects; although as time passes, more and more is being updated, in regards to the risks of exposure, length of recovery, outcomes of those infected, effectiveness of vaccines, …	2021/12/3	2022/9/20 10:55	2022/9/20 10:55		e20145		12	13		Cureus								English							Place: Palo Alto Publisher: Cureus Inc WOS:000728590500021				vaccination; covid; immunocompromised; immune-responses; adverse effect; aids
M8IQ8DST	journalArticle	2021	Pedersen, Eva S. L.; Mallet, Maria Christina; Lam, Yin Ting; Bellu, Sara; Cizeau, Isabelle; Copeland, Fiona; Fernandez, Trini Lopez; Manion, Michele; Harris, Amanda L.; Lucas, Jane S.; Santamaria, Francesca; Goutaki, Myrofora; Kuehni, Claudia E.	COVID-19 Vaccinations: Perceptions and Behaviours in People with Primary Ciliary Dyskinesia	Vaccines			10.3390/vaccines9121496		Primary ciliary dyskinesia (PCD) is a rare genetic disease that causes recurrent respiratory infections. People with PCD may be at higher risk of severe coronavirus disease 2019 (COVID-19), and therefore vaccination against severe acute respiratory syndrome coronavirus 2 (SARS-CoV-2) is important. We studied vaccination willingness, speed of vaccination uptake, side effects, and changes in social…	Dec-21	2022/9/20 10:55	2022/9/20 10:55		1496		12	9		Vaccines								English							Place: Basel Publisher: Mdpi WOS:000737452500001				covid-19; SARS-CoV-2; vaccine; pandemic; pcd; primary ciliary dyskinesia; vaccinations
TVEXCCFJ	journalArticle	2021	Taweel, Faris M.	A Component Model for Managing Covid-19 Crisis	International Journal of Computer Science and Network Security		1738-7906	10.22937/IJCSNS.2021.21.7.42		Covid-19 posed a serious threat to public health worldwide, especially in the absence of vaccines or medicines. The only viable strategies to combat a virus with a high infection rate were to apply lock-down strategies, transport ban, social and physical distancing. In this work, we provide a domain-specific component model for crisis management. The model allows for building a plan for managing …	2021/7/30	2022/9/20 10:55	2022/9/20 10:55		365-373		7	21		Int. J. Comput. Sci. Netw. Secur.								English							Place: Seoul Publisher: Int Journal Computer Science & Network Security-Ijcsns WOS:000691617600042				Covid-19; Component model; Crisis component model; Crisis Management; Domain-specific component model; Lock-down; Physical distancing; x-man ii
4LRGPCJX	journalArticle	2021	Batool, Hina; Batool, Sana; Mahmood, Malik Siddique; Mushtaq, Nada; Khan, Azmat Ullah; Ali, Muhammad; Sahibzada, Kashif Iqbal; Ashraf, Naeem Mahmood	Prediction of putative epitope-based vaccine against all corona virus strains for the Chinese population: Approach toward development of vaccine	Microbiology and Immunology		0385-5600	10.1111/1348-0421.12866		Currently, the whole world is facing the coronavirus disease-19 pandemic. As of now, approximately 0.15 million people around the globe are infected with the novel coronavirus. In the last decade, two strains of the coronavirus family, severe acute respiratory syndrome-related coronavirus and Middle East respiratory syndrome coronavirus, also resulted in epidemics in south Asian and the Middle Ea…	Apr-21	2022/9/20 10:55	2022/9/20 10:55		154-160		4	65		Microbiol. Immunol.								English							Place: Hoboken Publisher: Wiley WOS:000630095000001				covid-19; SARS-CoV-2; Chinese population; database; epitope-based vaccines; epitopes; human leukocyte antigen HLA; mhc-i; mhc-ii
8Y7YXKS3	journalArticle	2021	AlKhaldi, Mohammed; James, Nigel; Chattu, Vijay Kumar; Ahmed, Sara; Meghari, Hamza; Kaiser, Kirsty; IJsselmuiden, Carel; Tanner, Marcel	Rethinking and strengthening the Global Health Diplomacy through triangulated nexus between policy makers, scientists and the community in light of COVID-19 global crisis	Global Health Research and Policy			10.1186/s41256-021-00195-2		The COVID-19 pandemic is considerably the biggest global health challenge of this modern era. Spreading across all regions of the world, this corona virus disease has disrupted even some of the most advanced economies and healthcare systems. With an increasing global death toll and no near end in sight, questions on the efficacy of global response mechanisms, including the role and relevancy of g…	2021/4/13	2022/9/20 10:55	2022/9/20 10:55		12		1	6		Glob. Health Res. Policy								English							Place: London Publisher: Bmc WOS:000639445600001				covid-19; And science diplomacy; Global health diplomacy; Policy; Vaccine diplomacy
SUC6AMMF	journalArticle	2021	Goar, Vishal Kumar; Prabha, Jyoti	Software-Based Testing Kit Using Machine Learning for Diagnosis and Predictive Analytics of COVID-19 Patients	International Journal of Information System Modeling and Design		1947-8186	10.4018/IJISMD.2021040103		Nowadays, the global community is being affected with COVID-19 disease and integrated infections, which are becoming a menace to the whole world. Research is going on to find out the solution, and still, no particular vaccination or solution has been achieved. This research work is focusing on the analytics of dataset extracted, which has assorted attributes, and these attributes are processed in…	Jun-21	2022/9/20 10:55	2022/9/20 10:55		39-50		2	12		Int. J. Inf. Syst. Modeling Des.								English							Place: Hershey Publisher: Igi Global WOS:000637333200004				covid-19; ANN in Medical Diagnosis; Machine Learning; Medical Diagnosis; Neural Network-Based Predictions
T5WK2L47	journalArticle	2021	Cui, Xiaoni; Wang, Pengxiang; Wei, Zhun	Emergency use of COVID-19 vaccines recommended by the World Health Organization (WHO) as of June 2021	Drug Discoveries and Therapeutics		1881-7831	10.5582/ddt.2021.01064		In December 2019, the novel severe acute respiratory syndrome coronavirus 2 (SARS-CoV-2) caused the outbreak of coronavirus disease 2019 (COVID-19), and the resulting pandemic has caused widespread health problems and social and economic disruption. Thus far in 2021, more than 4 million people worldwide have died from COVID-19, so safe and efficacious vaccines are urgently needed to restore norma…	Aug-21	2022/9/20 10:55	2022/9/20 10:55		222-224		4	15		Drug Discov. Ther.								English							Place: Tokyo Publisher: Int Research & Cooperation Assoc Bio & Socio-Sciences Advancement WOS:000693630500009				covid-19; mRNA; adenoviral vectors; bnt162b2; inactivated viruses; recombinant proteins; vaccine research
8CC4V2I8	journalArticle	2021	Rehman, Zaira; Fahim, Ammad; Bhatti, Muhammad Faraz	Scouting the receptor-binding domain of SARS coronavirus 2: a comprehensive immunoinformatics inquisition	Future Virology		1746-0794	10.2217/fvl-2020-0269		Aim: December 2019 witnessed the emergence of a worldwide outbreak of a novel strain of coronavirus (CoV) termed SARS-CoV-2. Several preventive strategies are being developed, such as vaccines, to stop the spread of infection. Materials & methods: A comprehensive immunoinformatics approach was used to map conserved peptide sequences on the receptor binding domain of SARS-CoV-2 for their B-cell, T…	Feb-21	2022/9/20 10:55	2022/9/20 10:55		117-132		2	16		Future Virol.								English							Place: London Publisher: Future Medicine Ltd WOS:000620144700001				covid-19; outbreak; identification; prediction; coronaviruses; epitope mapping; human ACE2 receptor; korea
XPPLPS5I	journalArticle	2021	Issanov, Alpamys; Akhmetzhanova, Zylkiya; Riethmacher, Dieter; Aljofan, Mohamad	Knowledge, attitude, and practice toward COVID-19 vaccination in Kazakhstan: a cross-sectional study	Human Vaccines & Immunotherapeutics		2164-5515	10.1080/21645515.2021.1925054		Background: There are several COVID-19 vaccines available and many are under different stages of development. However, vaccine hesitancy, including vaccination delays and refusals, represents a major hurdle for achieving herd immunity. The current study aims to evaluate COVID-19 vaccine hesitancy and the associated factors. Method: This is a cross-sectional survey-based study that was conducted b…	2021/10/3	2022/9/20 10:55	2022/9/20 10:55		3394-3400		10	17		Human Vaccines Immunother.								English							Place: Philadelphia Publisher: Taylor & Francis Inc WOS:000655333200001				COVID-19 vaccine; vaccine hesitancy; COVID-19 pandemic; Kazakhstan; vaccine refusal
JKQY4LLJ	journalArticle	2021	Jana, Pradip; Bhardwaj, Bhagwati	Exploration of Some Naturally Occurring Fungal-Derived Bioactive Molecules as Potential SARS-CoV-2 Main Protease (M-Pro) Inhibitors Through In-silico Approach	Journal of Computational Biophysics and Chemistry		2737-4165	10.1142/S2737416521500113		Severe acute respiratory syndrome corona virus-2 (SARS-CoV-2) main protease (M-Pro) is recognized as an important therapeutic target protein in the drug development for COVID-19. To date, clinical trials of many vaccine and other viral protease inhibitors (PI) are currently under investigation. Undoubtedly, there are chances of possible side effects and ineffectiveness. Thus, the search for natur…	May-21	2022/9/20 10:55	2022/9/20 10:55		251-266		3	20		J. Comput. Biophys. Chem.								English							Place: Singapore Publisher: World Scientific Publ Co Pte Ltd WOS:000731578100004				covid-19; coronavirus; epidemiology; prediction; sars; adme; bioavailability; drug discovery; fungal-derived bio-actives; Molecular docking; multiple sequence alignment; SARS-CoV-2 M-Pro
WAM9TMBD	journalArticle	2022	Feng, Yanmeng; Zhang, Yifan; He, Zhangyufan; Huang, Haojie; Tian, Xiangxiang; Wang, Gang; Chen, Daihong; Ren, Yanqin; Jia, Liqiu; Wang, Wanhai; Wu, Jing; Shao, Lingyun; Zhang, Wenhong; Tang, Heng; Wan, Yanmin	Immunogenicity of an inactivated SARS-CoV-2 vaccine in people living with HIV-1: a non-randomized cohort study	Eclinicalmedicine			10.1016/j.eclinm.2021.101226		Background Inactivated COVID-19 vaccines are safe and effective in the general population with intact immunity. How ever, their safety and immunogenicity have not been demonstrated in people living with HIV (PLWH). Methods 42 HIV-1 infected individuals who were stable on combination antiretroviral therapy (cART) and 28 healthy individuals were enrolled in this open-label two-arm non-randomized st…	Jan-22	2022/9/20 10:55	2022/9/20 10:55		101226			43		EClinicalMedicine								English							Place: Amsterdam Publisher: Elsevier WOS:000747850800034				safety; infection; antibody-titers
MZ8DI7D4	journalArticle	2021	Griffith, Janessa; Marani, Husayn; Monkman, Helen	COVID-19 Vaccine Hesitancy in Canada: Content Analysis of Tweets Using the Theoretical Domains Framework	Journal of Medical Internet Research		1438-8871	10.2196/26874		Background: With the approval of two COVID-19 vaccines in Canada, many people feel a sense of relief, as hope is on the horizon. However, only about 75% of people in Canada plan to receive one of the vaccines. Objective: The purpose of this study is to determine the reasons why people in Canada feel hesitant toward receiving a COVID-19 vaccine. Methods: We screened 3915 tweets from public Twitter…	2021/4/13	2022/9/20 10:55	2022/9/20 10:55		e26874		4	23		J. Med. Internet Res.								English							Place: Toronto Publisher: Jmir Publications, Inc WOS:000642261400005				covid-19; vaccine; hesitancy; vaccine hesitancy; immunization; implementation; behavior; infodemiology; infoveillance; social media; behavioral science; behavioral-science theory; Canada; content analysis; framework; twitter; Twitter
NJNJKKGP	journalArticle	2021	Zhebit, V. A.	On the Information and Communicative Bases of the Coronavirus Pandemic	Scientific and Technical Information Processing		0147-6882	10.3103/S0147688221040122		The concept of the information and communication nature of the COVID-19 virus is presented, based on the results of research conducted by the author in the field of social communication. Some provisions of the author's theory of information viruses and their ability to influence the human body and large masses of the population are considered. It is proposed to consider the mechanism of the influ…	Oct-21	2022/9/20 10:55	2022/9/20 10:55		271-277		4	48		Sci. Tech. Inf. Process.								English							Place: New York Publisher: Pleiades Publishing Inc WOS:000761388200006				covid-19; pandemic; coronavirus; information; vaccination; communicative; information virology; information ecology; infovirus; society; systemic mind
7HC6W6SV	journalArticle	2021	Bose, Priyankar; Roy, Satyaki; Ghosh, Preetam	A Comparative NLP-Based Study on the Current Trends and Future Directions in COVID-19 Research	Ieee Access		2169-3536	10.1109/ACCESS.2021.3082108		COVID-19 is a global health crisis that has altered human life and still promises to create ripples of death and destruction in its wake. The sea of scientific literature published over a short time-span to understand and mitigate this global phenomenon necessitates concerted efforts to organize our findings and focus on the unexplored facets of the disease. In this work, we applied natural langu…	2021	2022/9/20 10:55	2022/9/20 10:55		78341-78355			9		IEEE Access								English							Place: Piscataway Publisher: Ieee-Inst Electrical Electronics Engineers Inc WOS:000673797600001				covid-19; sars-cov-2; influenza; coronavirus; epidemiology; vaccines; ebola-virus; infection; Coronaviruses; social media; Analytical models; bibliometric analysis; Bibliometrics; coefficient of variation; Data models; mean squared error; natural language processing; Natural language processing; oseltamivir; Public policy
6GDNVB9Q	journalArticle	2021	Wang, Xu; Yan, Wu; Lu, Lingling; Cao, Liming; Tian, Ye; Zhou, Kai	Chinese Parent Intention to Vaccinate Children With Special Diseases Against COVID-19	Frontiers in Public Health			10.3389/fpubh.2021.725980		Background: Information on the intention of parents of children with special diseases to vaccinate their children against coronavirus disease 2019 (COVID-19) is scarce. Methods: In this survey, all participants (n = 914) were enrolled from a tertiary children's hospital between September 2020 and April 2021. A face-to-face questionnaire interview was conducted to collect information on the specia…	2021/10/27	2022/9/20 10:55	2022/9/20 10:55		725980			9		Front. Public Health								English							Place: Lausanne Publisher: Frontiers Media Sa WOS:000717588700001				covid-19; vaccine; children; China; special diseases
9DYMGYQ6	journalArticle	2021	Shams, Pirbhat; Ali, Jamshed; Saadia, Sheema; Khan, Aamir Hameed; Sultan, Fateh Ali Tipoo; Tai, Javed	COVID-19 BBIBP-CorV vaccine and transient heart block - A phenomenon by chance or a possible correlation - A case report	Annals of Medicine and Surgery		2049-0801	10.1016/j.amsu.2021.102956		Importance: Bradyarrhythmia during COVID19 illness carries prognostic significance. Electrophysiological side effects of COVID19 vaccine remain largely unknown. It is imperative to report nature of cardiovascular side effects of the vaccine. Case presentation: An 80 years-old-man presented with complains of dizziness, trepidation and shortness of breath following his first shot of COVID-19 BBIBP-…	Nov-21	2022/9/20 10:55	2022/9/20 10:55		102956			71		Ann. Med. Surg.								English							Place: Oxford Publisher: Elsevier Sci Ltd WOS:000712026000005				Arrythmia; Atrioventricular block; Case report; cied; covid19; endomyocardial biopsy; Heart block; Humoral
2SDQT4GK	journalArticle	2022	Burger, Ronelle; Christian, Carmen; English, Rene; Maughan-Brown, Brendan; Rossouw, Laura	Predictors of mask-wearing during the advent of the COVID-19 pandemic: Evidence from South Africa	Translational Behavioral Medicine		1869-6716	10.1093/tbm/ibab132		Background: In the absence of a vaccine, the global spread of COVID-19 during 2020 has necessitated non-pharmaceutical interventions to curb the rise of cases. Purpose: The article uses the health belief model and a novel rapid mobile survey to examine correlates of reported mask-wearing as a non-pharmaceutical intervention in South Africa between May and August 2020. Methods: Two-way tabulations…	Jan-22	2022/9/20 10:55	2022/9/20 10:55		167-179		1	12		Transl. Behav. Med.								English							Place: Oxford Publisher: Oxford Univ Press WOS:000745655300017				covid-19; outbreak; risk; public-health; Prevention; Face-coverings; Masks; phase; preventive behaviors; South Africa
77CP3QXB	journalArticle	2022	Dash, Girish C.; Subhadra, Subhra; Turuk, Jyotirmayee; Parai, Debaprasad; Rath, Sonalika; Sabat, Jyotsnamayee; Rout, Usha K.; Kanungo, Srikanta; Choudhary, Hari R.; Nanda, Rashmi R.; Pattnaik, Matrujyoti; Pati, Sanghamitra; Bhattacharya, Debdutta	Breakthrough SARS-CoV-2 infections among BBV-152 (COVAXIN (R)) and AZD1222 (COVISHIELD) recipients: Report from the eastern state of India	Journal of Medical Virology		0146-6615	10.1002/jmv.27382		In this study, we attempted to record the breakthrough cases reported through passive and voluntary reporting at various healthcare facilities from different districts of Odisha, their clinical presentation, requirement of hospitalization postinfection, and antibody titer against spike antigen. Nasopharyngeal swab and serum samples alongwith demographic, clinical presentation and requirement of h…	Mar-22	2022/9/20 10:55	2022/9/20 10:55		1201-1205		3	94		J. Med. Virol.								English							Place: Hoboken Publisher: Wiley WOS:000706759900001				covid-19; vaccination; breakthrough; covaxin (r); covishield (tm)
VVR9AD2B	journalArticle	2021	Hayes, Breanne; Stanley, Jonathan; Peppers, Brian P.	COVID-19 Recurrence Without Seroconversion in a Patient With Mannose-Binding Lectin Deficiency	Allergy & Rhinology		2152-6567	10.1177/21526567211024140		Introduction: The SARS-CoV-2 virus has infected more than 63,000,000 people worldwide after emerging from Wuhan, China in December 2019. This outbreak was declared a Public Health Emergency in January 2020, and a pandemic in March. While rare, reinfection with the virus has been reported on multiple occasions. Case Presentation: We present a case report of an individual with mannose binding lecti…	Jun-21	2022/9/20 10:55	2022/9/20 10:55		2.15266E+16			12		Allergy Rhinol.								English							Place: Thousand Oaks Publisher: Sage Publications Inc WOS:000688162600001				covid-19; sars-cov2; immune deficiency; mannose-binding lectin; MBL deficiency
F43KPUMR	journalArticle	2021	Fedorowski, Jaroslaw J.	Could amantadine interfere with COVID-19 vaccines based on the LNP-mRNA platform?	Archives of Medical Science		1734-1922	10.5114/aoms/134716		Introduction: Amantadine is a well-known medication with indications in neurology and infectious diseases. It is currently FDA approved for Parkinson's disease, drug-induced extrapyramidal symptoms, and influenza. Methods: The article is the author's original research hypothesis. Results: Because more people are going to be vaccinated and additional similar vaccines are going to be introduced, we…	2021	2022/9/20 10:55	2022/9/20 10:55		827-828		3	17		Arch. Med. Sci.								English							Place: Poznan Publisher: Termedia Publishing House Ltd WOS:000680475600029				covid-19; vaccine; amantadine; LNP-mRNA
GZY8MV9C	journalArticle	2021	Greinacher, Andreas; Thiele, Thomas; Warkentin, Theodore E.; Weisser, Karin; Kyrle, Paul A.; Eichinger, Sabine	Thrombotic Thrombocytopenia after ChAdOx1 nCov-19 Vaccination	New England Journal of Medicine		0028-4793	10.1056/NEJMoa2104840		Background Several cases of unusual thrombotic events and thrombocytopenia have developed after vaccination with the recombinant adenoviral vector encoding the spike protein antigen of severe acute respiratory syndrome coronavirus 2 (SARS-CoV-2) (ChAdOx1 nCov-19, AstraZeneca). More data were needed on the pathogenesis of this unusual clotting disorder. Methods We assessed the clinical and laborat…	2021/6/3	2022/9/20 10:55	2022/9/20 10:55		2092-2101		22	384		N. Engl. J. Med.								English							Place: Waltham Publisher: Massachusetts Medical Soc WOS:000640363200001
A5IHI2CD	journalArticle	2021	Yaniv, Karin; Ozer, Eden; Lewis, Yair; Kushmaro, Ariel	RT-qPCR assays for SARS-CoV-2 variants of concern in wastewater reveals compromised vaccination-induced immunity	Water Research		0043-1354	10.1016/j.watres.2021.117808		SARS-CoV-2 variants of concern, demonstrating higher infection rate and lower vaccine effectiveness as compared with the original virus, are important factors propelling the ongoing COVID-19 global outbreak. Therefore, prompt identification of these variants in the environment is essential for pandemic assessment and containment efforts. One well established tool for such viral monitoring is the …	2021/12/1	2022/9/20 10:55	2022/9/20 10:55		117808			207		Water Res.								English							Place: Oxford Publisher: Pergamon-Elsevier Science Ltd WOS:000725059600008				covid-19; SARS-CoV-2; Vaccination; chain reaction; Reverse transcriptase quantitative polymerase; Variants of concern; Wastewater-based epidemiological
E72FJ7DS	journalArticle	2021	Young, Rodrigo M.; Solis, Camila J.; Barriga-Fehrman, Andres; Abogabir, Carlos; Thadani, Alvaro R.; Labarca, Mariana; Bustamante, Eva; Tapia, Cecilia; Sarda, Antonia G.; Sepulveda, Francisca; Pozas, Nadia; Cerpa, Leslie C.; Lavanderos, Maria A.; Varela, Nelson M.; Santibanez, Alvaro; Sandino, Ana M.; Reyes-Lopez, Felipe; Dixon, Garth; Quinones, Luis A.	Smartphone screen testing, a novel pre-diagnostic method to identify SARS-CoV-2 infectious individuals	Elife		2050-084X	10.7554/eLife.70333		The COVID-19 pandemic will likely take years to control globally, and constant epidemic surveillance will be required to limit the spread of SARS-CoV-2, especially considering the emergence of new variants that could hamper the effect of vaccination efforts. We developed a simple and robust - Phone Screen Testing (PoST) - method to detect SARS-CoV-2-positive individuals by RT-PCR testing of smart…	2021/6/22	2022/9/20 10:55	2022/9/20 10:55		e70333			10		eLife								English							Place: Cambridge Publisher: eLIFE SCIENCES PUBL LTD WOS:000672777900001				covid-19
B3XQDTEX	journalArticle	2021	Yameen, Muhammad; Sattar, Sara; Khalid, Ayesha; Aslam, Muhammad Aamir; Zafar, Nishat; Saeed, Muhammad Hassan; Arif, Muhammad Haseeb; Jahangeer, Muhammad; Qadeer, Azka; Hussain, Shoukat; Aamir, Muhammad; Mukhtar, Sania; Nasir, Huma; Shahzad, Asif	NOVEL SARS-COV-2 PANDEMIC TRANSMISSION WITH ONGOING ANTIVIRAL THERAPIES AND VACCINE DESIGN	Advancements of Microbiology		0079-4252	10.21307/PM-2021.60.1.02		Starting from the end of 2019 the new SARs-CoV-2 virus, in the period of a few months, had spread to 210 countries and its territories. The Wuhan wild animal market, in Hubei province, China is considered the epicenter of this pandemic. WHO declared the name COVID-19 to designate the disease caused by the SARS-CoV-2 virus. It is the third coronavirus pandemic after SARS in 2002-2003 and MERS-CoV …	Mar-21	2022/9/20 10:55	2022/9/20 10:55		13-20		1	60		Adv. Microbiol								English							Place: Warsaw Publisher: Polskie Towarzystwo Mikrobiologow-Polish Society of Microbiologists WOS:000634506200002				covid-19; sars-cov; mers; SARs-CoV-2; viral genome; who
44TM4V4F	journalArticle	2021	Jahn, Michael; Korth, Johannes; Dorsch, Oliver; Anastasiou, Olympia Evdoxia; Sorge-Haedicke, Burkhard; Tyczynski, Bartosz; Gaeckler, Anja; Witzke, Oliver; Dittmer, Ulf; Dolff, Sebastian; Wilde, Benjamin; Kribben, Andreas	Humoral Response to SARS-CoV-2-Vaccination with BNT162b2 (Pfizer-BioNTech) in Patients on Hemodialysis	Vaccines			10.3390/vaccines9040360		mRNA-based SARS-CoV-2 vaccines offer a preventive strategy against severe acute respiratory syndrome coronavirus-2 (SARS-CoV-2) infections that is of interest in the care of patients on hemodialysis (HDP). We measured humoral immune responses in 72 HDP after standard vaccination with two doses of the mRNA-based SARS-CoV-2 vaccine BNT162b2 (Pfizer-BioNTech). Antibody responses were evaluated with …	Apr-21	2022/9/20 10:55	2022/9/20 10:55		360		4	9		Vaccines								English							Place: Basel Publisher: Mdpi WOS:000643775800001				covid-19; SARS-CoV-2; antibody titers; chronic kidney disease; hemodialysis; mRNA-vaccines
6QLR7UUN	journalArticle	2021	Pan, Daniel; Mudalige, Nadeesha Lakmal; Sze, Shirley; Koeckerling, David; Oyefeso, Oluwatobiloba; Barker, Joseph; Williams, Caroline M. L.; Tang, Julian W.; Pareek, Manish	The new UK SARS-CoV-2 variant and lockdown-causes and consequences	Clinical Medicine		1470-2118	10.7861/clinmed.2021-0019		The new variant of concern (VOC), B.1.1.7, has a distinct set of mutations in nucleotides encoding the spike (S) protein on the surface of SARS-CoV-2. SARS-CoV-2 previously accumulated mutations at a much slower rate, of 1-2 per month; the sudden appearance of a large cluster of mutations was thought to be unusual. We now suspect that VOC may have arisen from immunosuppressed individuals who shed…	May-21	2022/9/20 10:55	2022/9/20 10:55		E295-E299		3	21		Clin. Med.								English							Place: London Publisher: Roy Coll Phys London Editorial Office WOS:000652738100029				SARS-CoV-2; vaccination; immunosuppression; lockdown; new variant
46TJ43LU	journalArticle	2021	David Ramirez, Juan; Munoz, Marina; Ballesteros, Nathalia; Patino, Luz H.; Castaneda, Sergio; Rincon, Carlos A.; Mendez, Claudia; Oliveros, Carolina; Perez, Julie; Marquez, Elizabeth K.; de los Santos Ortiz, Frank; Correa-Cardenas, Camilo A.; Clara Duque, Maria; Paniz-Mondolfi, Alberto	Phylogenomic Evidence of Reinfection and Persistence of SARS-CoV-2: First Report from Colombia	Vaccines			10.3390/vaccines9030282		The continuing evolution of SARS-CoV-2 and the emergence of novel variants have raised concerns about possible reinfection events and potential changes in the coronavirus disease 2019 (COVID-19) transmission dynamics. Utilizing Oxford Nanopore technologies, we sequenced paired samples of three patients with positive RT-PCR results in a 1-2-month window period, and subsequent phylogenetics and gen…	Mar-21	2022/9/20 10:55	2022/9/20 10:55		282		3	9		Vaccines								English							Place: Basel Publisher: Mdpi WOS:000634211100001				SARS-CoV-2; Colombia; genomic surveillance; reinfections
BLYUEQ4R	journalArticle	2021	Van Borm, Steven; Steensels, Mieke; Mathijs, Elisabeth; Vandenbussche, Frank; van den Berg, Thierry; Lambrecht, Benedicte	Metagenomic sequencing determines complete infectious bronchitis virus (avian Gammacoronavirus) vaccine strain genomes and associated viromes in chicken clinical samples	Virus Genes		0920-8569	10.1007/s11262-021-01872-7		Infectious bronchitis virus (IBV, genus Gammacoronavirus) causes an economically important and highly contagious disease in chicken. Random primed RNA sequencing was applied to two IBV positive clinical samples and one in ovo-passaged virus. The virome of a cloacal swab pool was dominated by IBV (82% of viral reads) allowing de novo assembly of a GI-13 lineage complete genome with 99.95% nucleoti…	Dec-21	2022/9/20 10:55	2022/9/20 10:55		529-540		6	57		Virus Genes								English							Place: Dordrecht Publisher: Springer WOS:000705759600001				pcr; alignment; Astrovirus; Coronaviridae; europe; field; Gallus gallus; genetic-characterization; history; Igacovirus; mafft; Metagenomics; Next-Generation Sequencing; rna; Sicinivirus; white chicks
G3PS8V8I	journalArticle	2021	Chen, Fan; Chen, Guo X.; Zhou, Jing; Xue, Yun; Wu, Mei X.	Childhood Bacille Calmette-Guerin Vaccination and Its Association With Less Severe COVID-19 Pneumonia	American Journal of Preventive Medicine		0749-3797	10.1016/j.amepre.2021.02.025		Introduction: The potential for Bacille Calmette-Guerin vaccination to mitigate COVID-19 severity and perhaps infection susceptibility has been hypothesized, attracting global attention given its off-target benefits shown in several respiratory viral infections. Methods: In this retrospective study, patients with laboratory-confirmed COVID-19 from Wuhan Pulmonary Hospital, China were categorized …	Sep-21	2022/9/20 10:55	2022/9/20 10:55		E119-E126		3	61		Am. J. Prev. Med.								English							Place: New York Publisher: Elsevier Science Inc WOS:000693070000002
CTN854UR	journalArticle	2022	Sellaturay, Priya; Gurugama, Padmalal; Harper, Verah; Dymond, Tom; Ewan, Pamela; Nasser, Shuaib	The Polysorbate containing AstraZeneca COVID-19 vaccine is tolerated by polyethylene glycol (PEG) allergic patients	Clinical and Experimental Allergy		0954-7894	10.1111/cea.14064		Background Polyethylene glycol (PEG) is the excipient found in the mRNA COVID-19 vaccines. We previously demonstrated PEG allergy was a cause of severe anaphylaxis to the Pfizer/BioNTech COVID-19 vaccine. PEG is widely used in many household products, cosmetics and medicines. However PEG allergy is rare, there have been few confirmed cases of PEG allergy. The excipient of potential concern in the…	Jan-22	2022/9/20 10:55	2022/9/20 10:55		12月17日		1	52		Clin. Exp. Allergy								English							Place: Hoboken Publisher: Wiley WOS:000728409000001				covid-19; COVID-19 vaccines; drug allergy; PEG allergy; polysorbate 80
958ETYK9	journalArticle	2021	Najmi, Ali; Nazari, Sahar; Safarighouzhdi, Farshid; MacIntyre, C. Raina; Miller, Eric J.; Rashidi, Taha H.	Facemask and social distancing, pillars of opening up economies	Plos One		1932-6203	10.1371/journal.pone.0249677		The COVID-19 pandemic has caused severe health and economic impacts globally. Strategies to safely reopen economies, travel and trade are a high priority. Until a reliable vaccine is available, non-pharmaceutical techniques are the only available means of disease control. In this paper, we aim to evaluate the extent to which social distancing (SD) and facemask (FM) use can mitigate the transmissi…	2021/4/20	2022/9/20 10:55	2022/9/20 10:55		e0249677		4	16		PLoS One								English							Place: San Francisco Publisher: Public Library Science WOS:000642162200023				model
X8S2BKKP	journalArticle	2021	Hiller, Nurith; Goldberg, Shraga Nahum; Cohen-Cymberknoh, Malena; Vainstein, Vladimir; Simanovsky, Natalia	Lymphadenopathy Associated With the COVID-19 Vaccine	Cureus			10.7759/cureus.13524		The coronavirus disease 2019 (COVID-19) pandemic has dominated nearly everyone's life since its initial outbreak in the Hubei province of China in December 2019. The disease had spread quickly throughout the world causing extensive, widespread morbidity, over two million deaths, and economical and social devastation over the entire world. Researchers and pharmaceutical companies around the globe …	2021/2/23	2022/9/20 10:55	2022/9/20 10:55		e13524		2	13		Cureus								English							Place: Palo Alto Publisher: Cureus Inc WOS:000621027800024				covid-19; covid-19 vaccine; ultrasound; regional lymphadenopathy; side effects
L4UW6W8X	journalArticle	2021	Shrivastava, Shubham; Patil, Harshad P.; Mhaske, Suhas T.; Palkar, Sonali; Lalwani, Sanjay; Mishra, Akhilesh Chandra; Arankalle, Vidya A.	Isolation and genetic characterization of SARS-CoV-2 from Indian patients in a single family without H/O travel abroad	Virus Genes		0920-8569	10.1007/s11262-021-01826-z		In view of the rapidly progressing COVID-19 pandemic, our aim was to isolate and characterize SARS-CoV-2 from Indian patients. SARS-CoV-2 was isolated from nasopharyngeal swabs collected from the two members of a family without any history of (H/O) travel abroad. Both the virus isolates (8003 and 8004) showed CPE on day 3 post-inoculation, viral antigens by immunofluorescence assay and produced d…	Jun-21	2022/9/20 10:55	2022/9/20 10:55		245-249		3	57		Virus Genes								English							Place: Dordrecht Publisher: Springer WOS:000626362000001				SARS-CoV-2; Mutation; Phylogeny; Plaque assay; tcid50; Virus isolates
UL8JXLXR	journalArticle	2021	Dansana, Debabrata; Kumar, Raghvendra; Parida, Arupa; Sharma, Rohit; Adhikari, Janmejoy Das; Le, Hiep Van; Pham, Binh Thai; Singh, Krishna Kant; Pradhan, Biswajeet	Using Susceptible-Exposed-Infectious-Recovered Model to Forecast Coronavirus Outbreak	Cmc-Computers Materials & Continua		1546-2218	10.32604/cmc.2021.012646		The Coronavirus disease 2019 (COVID-19) outbreak was first discovered in Wuhan, China, and it has since spread to more than 200 countries. The World Health Organization proclaimed COVID-19 a public health emergency of international concern on January 30, 2020. Normally, a quickly spreading infection that could jeopardize the well-being of countless individuals requires prompt action to forestall …	2021	2022/9/20 10:55	2022/9/20 10:55		1595-1612		2	67		CMC-Comput. Mat. Contin.								English							Place: Henderson Publisher: Tech Science Press WOS:000616667200016				covid-19; seir; forecasting; global pandemic; predict confirmed case
9ZRQWF9S	journalArticle	2021	Tanacli, Radu; Doeblin, Patrick; Goetze, Collin; Zieschang, Victoria; Faragli, Alessandro; Stehning, Christian; Korosoglou, Grigorios; Erley, Jennifer; Weiss, Jakob; Berger, Alexander; Proepper, Felix; Steinbeis, Fridolin; Kuehne, Titus; Seidel, Franziska; Geisel, Dominik; Cannon Walter-Rittel, Thula; Stawowy, Philipp; Witzenrath, Martin; Klingel, Karin; Van Linthout, Sophie; Pieske, Burkert; Tsc…	COVID-19 vs. Classical Myocarditis Associated Myocardial Injury Evaluated by Cardiac Magnetic Resonance and Endomyocardial Biopsy	Frontiers in Cardiovascular Medicine		2297-055X	10.3389/fcvm.2021.737257		Background: Despite the ongoing global pandemic, the impact of COVID-19 on cardiac structure and function is still not completely understood. Myocarditis is a rare but potentially serious complication of other viral infections with variable recovery, and is, in some cases, associated with long-term cardiac remodeling and functional impairment.Aim: To assess myocardial injury in patients who recen…	2021/12/24	2022/9/20 10:55	2022/9/20 10:55		737257			8		Front. Cardiovasc. Med.								English							Place: Lausanne Publisher: Frontiers Media Sa WOS:000743517700001				covid-19; management; vaccination; inflammation; biopsy; cmr; Lake Louise Criteria; myocarditis; state
JD89N6NG	journalArticle	2021	Borsova, Kristina; Paul, Evan D.; Kovacova, Viera; Radvanszka, Monika; Hajdu, Roman; Cabanova, Viktoria; Slavikova, Monika; Lickova, Martina; Lukacikova, L'ubomira; Belak, Andrej; Roussier, Lucia; Kosticova, Michaela; Liskova, Anna; Mad'arova, Lucia; Stefkovicova, Maria; Reizigova, Lenka; Novakova, Elena; Sabaka, Peter; Koscalova, Alena; Brejova, Brona; Staronova, Edita; Misik, Matej; Vinar, Toma…	Surveillance of SARS-CoV-2 lineage B.1.1.7 in Slovakia using a novel, multiplexed RT-qPCR assay	Scientific Reports		2045-2322	10.1038/s41598-021-99661-7		The emergence of a novel SARS-CoV-2 B.1.1.7 variant sparked global alarm due to increased transmissibility, mortality, and uncertainty about vaccine efficacy, thus accelerating efforts to detect and track the variant. Current approaches to detect B.1.1.7 include sequencing and RT-qPCR tests containing a target assay that fails or results in reduced sensitivity towards the B.1.1.7 variant. Since m…	2021/10/14	2022/9/20 10:55	2022/9/20 10:55		20494		1	11		Sci Rep								English							Place: Berlin Publisher: Nature Portfolio WOS:000707419500038				pcr; sensitivity
YFWJDM73	journalArticle	2021	Nguyen, Khue Vu	Problems associated with antiviral drugs and vaccines development for COVID-19: approach to intervention using expression vectors via GPI anchor	Nucleosides Nucleotides & Nucleic Acids		1525-7770	10.1080/15257770.2021.1914851		The outbreak of a novel coronavirus responsible for the severe acquired respiratory syndrome: SARS-CoV-2, also known as coronavirus disease 2019: COVID-19, represents a pandemic threat that has been declared a public health emergency of international concern. The CoV spike (S) glycoprotein is a key target for diagnostic, development of antibodies, entry inhibitors, and vaccines. COVID-19 also rec…	2021/6/3	2022/9/20 10:55	2022/9/20 10:55		665-706		6	40		Nucleosides Nucleotides Nucleic Acids								English							Place: Philadelphia Publisher: Taylor & Francis Inc WOS:000650642900001				influenza; safety; mutations; lessons; angiotensin-converting enzyme 2 (ACE2); coronavirus disease 2019 (COVID-19); expression vectors via GPI anchor; intermolecular interactions; Severe acquired respiratory syndrome (SARS); spike (S) protein
4X7GG33P	journalArticle	2021	Murray, Jackelyn; Hogan, Robert J.; Martin, David E.; Blahunka, Kathy; Sancilio, Fred D.; Balyan, Rajiv; Lovern, Mark; Still, Richard; Tripp, Ralph A.	Probenecid inhibits SARS-CoV-2 replication in vivo and in vitro	Scientific Reports		2045-2322	10.1038/s41598-021-97658-w		Effective vaccines are slowing the COVID-19 pandemic, but SARS-CoV-2 will likely remain an issue in the future making it important to have therapeutics to treat patients. There are few options for treating patients with COVID-19. We show probenecid potently blocks SARS-CoV-2 replication in mammalian cells and virus replication in a hamster model. Furthermore, we demonstrate that plasma concentrat…	2021/9/10	2022/9/20 10:55	2022/9/20 10:55		18085		1	11		Sci Rep								English							Place: Berlin Publisher: Nature Portfolio WOS:000694868000002				advisory-committee; practices interim recommendation; united-states; covid-19 vaccine; transport
W9FUC2D2	journalArticle	2021	Datta, Pratik; Ukey, Rahul; Bruiners, Natalie; Honnen, William; Carayannopoulos, Mary O.; Reichman, Charles; Choudhary, Alok; Onyuka, Alberta; Handler, Deborah; Guerrini, Valentina; Mishra, Pankaj K.; Dewald, Hannah K.; Lardizabal, Alfred; Lederer, Leeba; Leiser, Aliza L.; Hussain, Sabiha; Jagpal, Sugeet K.; Radbel, Jared; Bhowmick, Tanaya; Horton, Daniel B.; Barrett, Emily S.; Xie, Yingda L.; Fi…	Highly versatile antibody binding assay for the detection of SARS-CoV-2 infection and vaccination	Journal of Immunological Methods		0022-1759	10.1016/j.jim.2021.113165		Monitoring the burden and spread of infection with the new coronavirus SARS-CoV-2, whether within small communities or in large geographical settings, is of paramount importance for public health purposes. Serology, which detects the host antibody response to the infection, is the most appropriate tool for this task, since virusderived markers are most reliably detected during the acute phase of …	Dec-21	2022/9/20 10:55	2022/9/20 10:55		113165			499		J. Immunol. Methods								English							Place: Amsterdam Publisher: Elsevier WOS:000720364300008				covid-19; epitopes; Breast milk; domain; gp120; Microsampling; Seroepidemiology; v1/v2
L82BI85B	journalArticle	2021	Latkin, Carl; Dayton, Lauren; Yi, Grace; Jaleel, Afareen; Nwosu, Chikaodinaka; Limaye, Rupali	COVID-19 vaccine delay: An examination of United States residents' intention to delay vaccine uptake	Human Vaccines & Immunotherapeutics		2164-5515	10.1080/21645515.2021.1917234		The current study examines differences between COVID-19 vaccine intention and delay. A survey was administered to 585 US respondents in late November 2020 as part of an online longitudinal study. Respondents provided information on whether they would obtain a COVID-19 vaccine, once available, and how long they intended to wait before obtaining it. In the negative intention group, 3.4% reported wa…	2021/9/2	2022/9/20 10:55	2022/9/20 10:55		2903-2913		9	17		Human Vaccines Immunother.								English							Place: Philadelphia Publisher: Taylor & Francis Inc WOS:000652396500001				covid-19; COVID-19 vaccine; hesitancy; impact; selection; social norms; vaccine delay
T9MWUPAF	journalArticle	2021	Banyal, Siddhant; Dwivedi, Rinky; Gupta, Koyel Datta; Sharma, Deepak Kumar; Al-Turjman, Fadi; Mostarda, Leonardo	Technology Landscape for Epidemiological Prediction and Diagnosis of COVID-19	Cmc-Computers Materials & Continua		1546-2218	10.32604/cmc.2021.014387		The COVID-19 outbreak initiated from the Chinese city of Wuhan and eventually affected almost every nation around the globe. From China, the disease started spreading to the rest of the world. After China, Italy became the next epicentre of the virus and witnessed a very high death toll. Soon nations like the USA became severely hit by SARS-CoV-2 virus. The World Health Organisation, on 11th Marc…	2021	2022/9/20 10:55	2022/9/20 10:55		1679-1696		2	67		CMC-Comput. Mat. Contin.								English							Place: Henderson Publisher: Tech Science Press WOS:000616667200021				covid-19; pandemic; diagnosis; prediction; framework; big data; deep learning; forecasting models; machine learning; metaheuristics; time-series
2VECVNRG	journalArticle	2021	Gelbenegger, Georg; Cacioppo, Filippo; Firbas, Christa; Jilma, Bernd	Rhabdomyolysis Following Ad26.COV2.S COVID-19 Vaccination	Vaccines			10.3390/vaccines9090956		We report the case of a 19-year-old male who complained of myalgia, muscle weakness, and darkened urine two days after receiving his Ad26.COV2.S (Johnson & Johnson, New Brunswick, New Jersey, United States) COVID-19 vaccination. Blood examination revealed an increased creatine kinase (CK) level, and his urinary dipstick tested positive for blood, indicative of acute rhabdomyolysis. Serum creatini…	Sep-21	2022/9/20 10:55	2022/9/20 10:55		956		9	9		Vaccines								English							Place: Basel Publisher: Mdpi WOS:000702081700001				covid-19; vaccine; Ad26.COV2.S; myoglobinuria; necrosis; rhabdomyolysis
KZKK6C4E	journalArticle	2021	Spencer, Alexandra J.; McKay, Paul F.; Belij-Rammerstorfer, Sandra; Ulaszewska, Marta; Bissett, Cameron D.; Hu, Kai; Samnuan, Karnyart; Blakney, Anna K.; Wright, Daniel; Sharpe, Hannah R.; Gilbride, Ciaran; Truby, Adam; Allen, Elizabeth R.; Gilbert, Sarah C.; Shattock, Robin J.; Lambe, Teresa	Heterologous vaccination regimens with self-amplifying RNA and adenoviral COVID vaccines induce robust immune responses in mice	Nature Communications		2041-1723	10.1038/s41467-021-23173-1		Several vaccines have demonstrated efficacy against SARS-CoV-2 mediated disease, yet there is limited data on the immune response induced by heterologous vaccination regimens using alternate vaccine modalities. Here, we present a detailed description of the immune response, in mice, following vaccination with a self-amplifying RNA (saRNA) vaccine and an adenoviral vectored vaccine (ChAdOx1 nCoV-1…	2021/5/17	2022/9/20 10:55	2022/9/20 10:55		2893		1	12		Nat. Commun.								English							Place: Berlin Publisher: Nature Research WOS:000658736800002				safety; immunogenicity; adults; chadox1
BI9GPULF	journalArticle	2021	Cosma, Stefano; Carosso, Andrea Roberto; Corcione, Silvia; Cusato, Jessica; Borella, Fulvio; Antonucci, Miriam; Marozio, Luca; Revelli, Alberto; Preti, Mario; Ghisetti, Valeria; Di Perri, Giovanni; Benedetto, Chiara	Longitudinal analysis of antibody response following SARS-CoV-2 infection in pregnancy: From the first trimester to delivery	Journal of Reproductive Immunology		0165-0378	10.1016/j.jri.2021.103285		We report herein the longest-lasting study of SARS-CoV-2 antibody profile in pregnancy, from first trimester infection to delivery. Seventeen out of 164 pregnant women tested positive for COVID-19. Throughout pregnancy, the neutralizing antibody titer remained stable, whilst a significant decline in the non-neutralizing antibodies was observed after 16 weeks of gestation. All the newborns of wome…	Apr-21	2022/9/20 10:55	2022/9/20 10:55		103285			144		J. Reprod. Immunol.								English							Place: Clare Publisher: Elsevier Ireland Ltd WOS:000624565500008				SARS-CoV-2; Pregnancy; Antibodies; COVID-19 vaccines; COVID-19 immunology
FPBB49LH	journalArticle	2022	Lipsitch, Marc; Krammer, Florian; Regev-Yochay, Gili; Lustig, Yaniv; Balicer, Ran D.	SARS-CoV-2 breakthrough infections in vaccinated individuals: measurement, causes and impact	Nature Reviews Immunology		1474-1733	10.1038/s41577-021-00662-4		Here, Lipsitch and colleagues assess the impact of breakthrough SARS-CoV-2 infections that occur in individuals who have been vaccinated against COVID-19. The authors explain how the rate of breakthrough infections can be measured, what the causes of these infections are and discuss other key questions that need to be considered in light of these infections. Breakthrough infections with severe ac…	Jan-22	2022/9/20 10:55	2022/9/20 10:55		57-65		1	22		Nat. Rev. Immunol.								English							Place: Berlin Publisher: Nature Portfolio WOS:000727755200001				protection; covid-19 vaccine; efficacy; immunogenicity; deaths; workers; antibody; bnt162b2; hospitalizations; humoral immunity
56TJRDW2	journalArticle	2021	Gepreel, Khaled A.; Mohamed, Mohamed S.; Alotaibi, Hammad; Mahdy, Amr M. S.	Dynamical Behaviors of Nonlinear Coronavirus (COVID-19) Model with Numerical Studies	Cmc-Computers Materials & Continua		1546-2218	10.32604/cmc.2021.012200		The development of mathematical modeling of infectious diseases is a key research area in various fields including ecology and epidemiology. One aim of these models is to understand the dynamics of behavior in infectious diseases. For the new strain of coronavirus (COVID-19), there is no vaccine to protect people and to prevent its spread so far. Instead, control strategies associated with health…	2021	2022/9/20 10:55	2022/9/20 10:55		675-686		1	67		CMC-Comput. Mat. Contin.								English							Place: Henderson Publisher: Tech Science Press WOS:000608500800003				differential transform method; equilibrium point; existence of uniformly stable; homotopy perturbation method; Nonlinear COVID-19 model; reduced differential transform method; signal flow graph; stability
XN4CAZNS	journalArticle	2021	Jearanaiwitayakul, Tuksin; Seesen, Mathurin; Chawengkirttikul, Runglawan; Limthongkul, Jitra; Apichirapokey, Suttikarn; Sapsutthipas, Sompong; Phumiamorn, Supaporn; Sunintaboon, Panya; Ubol, Sukathida	Intranasal Administration of RBD Nanoparticles Confers Induction of Mucosal and Systemic Immunity against SARS-CoV-2	Vaccines			10.3390/vaccines9070768		Mucosal immunity plays a significant role in host defense against viruses in the respiratory tract. Because the upper respiratory airway is a primary site of SARS-CoV-2 entry, immunization at the mucosa via the intranasal route could potentially lead to induction of local sterilizing immunity that protects against SARS-CoV-2 infection. In this study, we evaluated the immunogenicity of a receptor-…	Jul-21	2022/9/20 10:55	2022/9/20 10:55		768		7	9		Vaccines								English							Place: Basel Publisher: Mdpi WOS:000676976200001				covid-19; protection; vaccination; rbd; immunogenicity; identification; antibody; antigen; intranasal vaccine; mice; n-trimethyl chitosan; nano-delivery vaccine
RQHPL456	journalArticle	2021	Shklarski, Liat; Abrams, Allison; Bakst, Elana	Will We Ever Again Conduct in-Person Psychotherapy Sessions? Factors Associated with the Decision to Provide in-Person Therapy in the Age of COVID-19	Journal of Contemporary Psychotherapy		0022-0116	10.1007/s10879-021-09492-w		The COVID-19 pandemic has forced a new reality on the delivery of psychotherapeutic services. Therapists have had to rapidly adapt to telehealth therapy using various video conferencing technologies while working from spaces that were not necessarily designed for delivering therapy sessions. While COVID-19 continues to be present in therapists' lives and shapes how they provide services, answerin…	Sep-21	2022/9/20 10:55	2022/9/20 10:55		265-272		3	51		J. Contemp. Psychother.								English							Place: Cham Publisher: Springer International Publishing Ag WOS:000628089700001				COVID-19 pandemic; In-person psychotherapy; Telepsychotherapy
4F42TI4G	journalArticle	2021	Duni, Anila; Markopoulos, Georgios S.; Mallioras, Ioannis; Pappas, Haralampos; Pappas, Efthymios; Koutlas, Vasileios; Tzalavra, Eirini; Baxevanos, Gerasimos; Priska, Silvia; Gartzonika, Konstantina; Mitsis, Michael; Dounousi, Evangelia	The Humoral Immune Response to BNT162b2 Vaccine Is Associated With Circulating CD19+B Lymphocytes and the Naive CD45RA to Memory CD45RO CD4+T Helper Cells Ratio in Hemodialysis Patients and Kidney Transplant Recipients	Frontiers in Immunology		1664-3224	10.3389/fimmu.2021.760249		BackgroundThe humoral and cellular immune responses to SARS-COV-2 vaccination remain to be elucidated in hemodialysis (HD) patients and kidney transplant recipients (KTRs), considering their baseline immunosuppressed status. The aim of our study was to assess the associations of vaccine-induced antibody responses with circulating lymphocytes sub-populations and their respective patterns of altera…	2021/12/3	2022/9/20 10:55	2022/9/20 10:55		760249			12		Front. Immunol.								English							Place: Lausanne Publisher: Frontiers Media Sa WOS:000761069000001				covid-19; immunization; risk; antibody-response; protective immunity; hemodialysis; anti-SARS-CoV2 antibodies; CD19+B lymphocytes; cd4(+) t-cells; failure; kidney transplant recipients; memory CD4+CD45RO+T helper cells; naive CD4+CD45RA+T helper cells; responsiveness; roles; SARS-COV-2 vaccination; stage renal-disease
IXTW5MJ9	journalArticle	2022	Heald, Adrian H.; Stedman, Michael; Horne, Linda; Rea, Rustam; Whyte, Martin; Gibson, J. Martin; Anderson, Simon G.; Ollier, Willam	The change in glycaemic control immediately after COVID-19 vaccination in people with type 1 diabetes	Diabetic Medicine		0742-3071	10.1111/dme.14774		Aims Evidence suggests that some people with type 1 diabetes mellitus (T1DM) experience temporary instability of blood glucose (BG) levels after COVID-19 vaccination. We aimed to assess this objectively. Methods We examined the interstitial glucose profile of 97 consecutive adults (age >= 18 years) with T1DM using the FreeStyle Libre(R) flash glucose monitor in the periods immediately before and …	Apr-22	2022/9/20 10:55	2022/9/20 10:55		e14774		4	39		Diabetic Med.								English							Place: Hoboken Publisher: Wiley WOS:000736059200001				COVID-19 vaccination; flash glucose monitoring; glucose; glycaemic stability; HbA(1c); primary-care; type 1 diabetes
MW5Q9KNE	journalArticle	2021	Akbay, Burkitkan; Abidi, Syed Hani; Ibrahim, Mahmoud A. A.; Mukhatayev, Zhussipbek; Ali, Syed	Multi-Subunit SARS-CoV-2 Vaccine Design Using Evolutionarily Conserved T- and B- Cell Epitopes	Vaccines			10.3390/vaccines9070702		The SARS-CoV-2 pandemic has created a public health crisis worldwide. Although vaccines against the virus are efficiently being rolled out, they are proving to be ineffective against certain emerging SARS-CoV-2 variants. The high degree of sequence similarity between SARS-CoV-2 and other human coronaviruses (HCoV) presents the opportunity for designing vaccines that may offer protection against S…	Jul-21	2022/9/20 10:55	2022/9/20 10:55		702		7	9		Vaccines								English							Place: Basel Publisher: Mdpi WOS:000677034000001				disease; SARS-CoV-2; vaccine; coronavirus; epitope; covid-19 vaccine; efficacy; prediction; trial; mers; cross-reactivity; fast interaction refinement; human coronaviruses; SARS-CoV; sequence; web
UVFUMPZ2	journalArticle	2021	Amundson, Dennis E.; Shah, Usman S.; de Necochea-Campion, Rosalia; Jacobs, Michael; LaRosa, Steven P.; Fisher, Charles J.	Removal of COVID-19 Spike Protein, Whole Virus, Exosomes, and Exosomal MicroRNAs by the Hemopurifier (R) Lectin-Affinity Cartridge in Critically Ill Patients With COVID-19 Infection	Frontiers in Medicine			10.3389/fmed.2021.744141		Coronavirus-19 (COVID-19) has rapidly spread throughout the world resulting in a significant amount of morbidity and mortality. Despite advances in therapy, social distancing, masks, and vaccination many places in the world continue to see an increase in the number of cases and deaths. Viremia is commonly present in severely ill patients with COVID-19 infections and is associated with organ dysfu…	2021/10/8	2022/9/20 10:55	2022/9/20 10:55		744141			8		Front. Med.								English							Place: Lausanne Publisher: Frontiers Media Sa WOS:000710939500001				covid-19; SARS-CoV-2; exosome; extracorporeal therapy; Galanthus nivalis agglutinin; hemopurifier; lectin; microRNA
D378Q5Q6	journalArticle	2021	Kunchev, M.; Gergova, J.; Mutafchiyski, V.; Titianov, E.	Vaccine Strategies and Processes for Vaccine Development Against SARS-CoV-2	Neurosonology and Cerebral Hemodynamics		1312-6431			The review analyzes the processes of vaccine development against SARS-CoV-2 and the choice of different vaccine strategies in the context of the COVID-19 pandemic. There are around 166 vaccine applicants in various phases of clinical and pre-clinical trials, four of which are approved for use in the European Union. Vaccine platforms are divided into six categories: live attenuated viruses, recomb…	2021	2022/9/20 10:55	2022/9/20 10:55		29-35		1	17		Neursonology Cereb. Hemodynamics								English							Place: Sofia Publisher: Bulgarian Soc Neurosonology & Cerebral Hemodynamics WOS:000642448000003				SARS-CoV-2; vaccines; respiratory syndrome coronavirus; vaccine strategies
V5BNLEYU	journalArticle	2021	Cheong, Queena; Au-Yeung, Martin; Quon, Stephanie; Concepcion, Katsy; Kong, Jude Dzevela	Predictive Modeling of Vaccination Uptake in US Counties: A Machine Learning-Based Approach	Journal of Medical Internet Research		1438-8871	10.2196/33231		Background: Although the COVID-19 pandemic has left an unprecedented impact worldwide, countries such as the United States have reported the most substantial incidence of COVID-19 cases worldwide. Within the United States, various sociodemographic factors have played a role in the creation of regional disparities. Regional disparities have resulted in the unequal spread of disease between US coun…	2021/11/25	2022/9/20 10:55	2022/9/20 10:55		e33231		11	23		J. Med. Internet Res.								English							Place: Toronto Publisher: Jmir Publications, Inc WOS:000726106400002				model; covid-19; SARS-CoV-2; vaccine; public health; machine learning; prediction; United States; sociodemographic; sociodemographic factors; uptake; XGBoost
9MLMDCA3	journalArticle	2021	Glantz, Michael H.; Pierce, Gregory E.	Forecast Hesitancy: Why are People Reluctant to Believe, Accept, or Respond to Various Weather, Water, and Climate Hazard-Related Forecasts?	International Journal of Disaster Risk Science		2095-0055	10.1007/s13753-021-00353-7		Current discussions of the social phenomenon of "vaccine hesitancy'' with regard to Covid-19 provide an opportunity to use hesitancy as a means to shift thinking about untimely and delayed responses to forecasts of hydrometeorological hazards. Hesitancy, that is, provides a paradigm through which such regrettably delayed responses to hydromet hazards might be better understood and effectively add…	Aug-21	2022/9/20 10:55	2022/9/20 10:55		600-609		4	12		Int. J. Disaster Risk Sci.								English							Place: New York Publisher: Springer WOS:000654817100001				Vaccine hesitancy; Hesitancy; Disaster risk reduction; Forecast; Forecast hesitancy; Hydromet hazards
5QNEFETG	journalArticle	2021	Schardt, John S.; Pornnoppadol, Ghasidit; Desai, Alec A.; Park, Kyung Soo; Zupancic, Jennifer M.; Makowski, Emily K.; Smith, Matthew D.; Chen, Hongwei; Barbosa, Mayara Garcia de Mattos; Cascalho, Marilia; Lanigan, Thomas M.; Moon, James J.; Tessier, Peter M.	Discovery and characterization of high-affinity, potent SARS-CoV-2 neutralizing antibodies via single B cell screening	Scientific Reports		2045-2322	10.1038/s41598-021-99401-x		Monoclonal antibodies that target SARS-CoV-2 with high affinity are valuable for a wide range of biomedical applications involving novel coronavirus disease (COVID-19) diagnosis, treatment, and prophylactic intervention. Strategies for the rapid and reliable isolation of these antibodies, especially potent neutralizing antibodies, are critical toward improved COVID-19 response and informed future…	2021/10/20	2022/9/20 10:55	2022/9/20 10:55		20738		1	11		Sci Rep								English							Place: Berlin Publisher: Nature Portfolio WOS:000709427000020				spike; vaccines; expression; cloning; generation; monoclonal-antibodies
UYGBY4HM	journalArticle	2021	Cocco, Giulio; Pizzi, Andrea Delli; Fabiani, Stefano; Cocco, Nino; Boccatonda, Andrea; Frisone, Alessio; Scarano, Antonio; Schiavone, Cosima	Lymphadenopathy after the Anti-COVID-19 Vaccine: Multiparametric Ultrasound Findings	Biology-Basel			10.3390/biology10070652		Simple Summary Post-anti-COVID-19 vaccine lymphadenopathy is a not uncommon event. In this study, we investigated the multiparametric ultrasound findings of patients with post-vaccine lymphadenopathy and compared these findings among different anti-COVID-19 vaccines. We evaluated patients presenting with post-anti-COVID-19 lymphadenopathy. The presence, size, location, number, morphology, cortex-…	Jul-21	2022/9/20 10:55	2022/9/20 10:55		652		7	10		Biology-Basel								English							Place: Basel Publisher: Mdpi WOS:000678155400001				mortality; lymphadenopathy; ultrasound; cancer; anti-COVID-19 vaccines
JYKKZCBD	journalArticle	2021	Collier, Ai-ris Y.; McMahan, Katherine; Yu, Jingyou; Tostanoski, Lisa H.; Aguayo, Ricardo; Ansel, Jessica; Chandrashekar, Abishek; Patel, Shivani; Apraku Bondzie, Esther; Sellers, Daniel; Barrett, Julia; Sanborn, Owen; Wan, Huahua; Chang, Aiquan; Anioke, Tochi; Nkolola, Joseph; Bradshaw, Connor; Jacob-Dolan, Catherine; Feldman, Jared; Gebre, Makda; Borducchi, Erica N.; Liu, Jinyan; Schmidt, Aaron…	Immunogenicity of COVID-19 mRNA Vaccines in Pregnant and Lactating Women	Jama-Journal of the American Medical Association		0098-7484	10.1001/jama.2021.7563		IMPORTANCE Pregnant women are at increased risk of morbidity and mortality from COVID-19 but have been excluded from the phase 3 COVID-19 vaccine trials. Data on vaccine safety and immunogenicity in these populations are therefore limited. OBJECTIVE To evaluate the immunogenicity of COVID-19 messenger RNA (mRNA) vaccines in pregnant and lactating women, including against emerging SARS-CoV-2 varia…	2021/6/15	2022/9/20 10:55	2022/9/20 10:55		2370-2380		23	325		JAMA-J. Am. Med. Assoc.								English							Place: Chicago Publisher: Amer Medical Assoc WOS:000650215800001				vaccination
DZWW9U7D	journalArticle	2022	Yatsuzuka, Kazuki; Murakami, Masamoto; Kuroo, Yuta; Fukui, Maiko; Yoshida, Satoshi; Muto, Jun; Shiraishi, Ken; Sayama, Koji	Flare-up of generalized pustular psoriasis combined with systemic capillary leak syndrome after coronavirus disease 2019 mRNA vaccination	Journal of Dermatology		0385-2407	10.1111/1346-8138.16271		Generalized pustular psoriasis (GPP) is characterized by acute flare-ups induced by various factors, but few reports have described GPP onset or flare-up induced by vaccination. To our knowledge, only three such cases following coronavirus disease 2019 (COVID-19) vaccination have been reported. We herein report a case of GPP flare-up after COVID-19 mRNA vaccination. A 65-year-old man with GPP con…	Apr-22	2022/9/20 10:55	2022/9/20 10:55		454-458		4	49		J. Dermatol.								English							Place: Hoboken Publisher: Wiley WOS:000725946500001				vaccines; coronavirus disease 2019; flare-up; pustular psoriasis; systemic capillary leak syndrome
M2CLX7KG	journalArticle	2021	Cameron, Andrew; Porterfield, Claire A.; Byron, Larry D.; Wang, Jiong; Pearson, Zachary; Bohrhunter, Jessica L.; Cardillo, Anthony B.; Ryan-Muntz, Lindsay; Sorensen, Ryan A.; Caserta, Mary T.; Angeloni, Stephen; Hardy, Dwight J.; Zand, Martin S.; Pecora, Nicole D.	A Multiplex Microsphere IgG Assay for SARS-CoV-2 Using ACE2-Mediated Inhibition as a Surrogate for Neutralization	Journal of Clinical Microbiology		0095-1137	10.1128/JCM.02489-20		The coronavirus disease 2019 (COVID-19) pandemic has highlighted the challenges inherent to the serological detection of a novel pathogen such as severe acute respiratory syndrome coronavirus 2 (SARS-CoV-2). Serological tests can be used diagnostically and for surveillance, but their usefulness depends on their throughput, sensitivity, and specificity. Here, we describe a multiplex fluorescent mi…	Feb-21	2022/9/20 10:55	2022/9/20 10:55		e02489-20		2	59		J. Clin. Microbiol.								English							Place: Washington Publisher: Amer Soc Microbiology WOS:000610235700035				covid-19; SARS-CoV-2; vaccine; coronavirus; immunoassays; neutralizing antibodies; spike protein; IgG; serology; sars-cov; fluorescence assays; microsphere; nucleocapsid protein
DGVJD38X	journalArticle	2021	Oud, Mohammed A. Aba; Ali, Aatif; Alrabaiah, Hussam; Ullah, Saif; Khan, Muhammad Altaf; Islam, Saeed	A fractional order mathematical model for COVID-19 dynamics with quarantine, isolation, and environmental viral load	Advances in Difference Equations		1687-1847	10.1186/s13662-021-03265-4		COVID-19 or coronavirus is a newly emerged infectious disease that started in Wuhan, China, in December 2019 and spread worldwide very quickly. Although the recovery rate is greater than the death rate, the COVID-19 infection is becoming very harmful for the human community and causing financial loses to their economy. No proper vaccine for this infection has been introduced in the market in orde…	2021/2/11	2022/9/20 10:55	2022/9/20 10:55		106		1	2021		Adv. Differ. Equ.								English							Place: New York Publisher: Springer WOS:000619777100002				covid-19; Stability analysis; Caputo fractional model; Environmental impact; Parameter estimations; Quarantine and isolation; Real data; Simulation
9CUYFLIT	journalArticle	2021	Abdy, Muhammad; Side, Syafruddin; Annas, Suwardi; Nur, Wahyuddin; Sanusi, Wahidah	An SIR epidemic model for COVID-19 spread with fuzzy parameter: the case of Indonesia	Advances in Difference Equations		1687-1847	10.1186/s13662-021-03263-6		The aim of this research is to construct an SIR model for COVID-19 with fuzzy parameters. The SIR model is constructed by considering the factors of vaccination, treatment, obedience in implementing health protocols, and the corona virus-load. Parameters of the infection rate, recovery rate, and death rate due to COVID-19 are constructed as a fuzzy number, and their membership functions are used …	2021/2/11	2022/9/20 10:55	2022/9/20 10:55		105		1	2021		Adv. Differ. Equ.								English							Place: New York Publisher: Springer WOS:000619777100001				covid-19; Vaccination; Fuzzy parameter; Health protocol; SIR model; Treatment
VHIMECTY	journalArticle	2022	Konc, Iva; Petrovic, Kristina; Dinic, Bojana M.	Dark Tetrad and COVID-19 protective measures: Mediating effects of risk-taking tendencies	Personality and Individual Differences		0191-8869	10.1016/j.paid.2021.111341		Previous research has shown that Dark Triad traits are tied to non-compliance, while there is not enough research regarding sadism. As dark traits are related to risk-taking behaviors, we hypothesized that proneness to risk taking could be a mediating mechanism explaining the relation between dark traits and non-compliance with protective measures. Sample comprised of 348 participants (77% women)…	Feb-22	2022/9/20 10:55	2022/9/20 10:55		111341			186		Pers. Individ. Differ.								English							Patent Number: A Place: Oxford Publisher: Pergamon-Elsevier Science Ltd WOS:000711123500016				covid-19; Vaccination; Dark Tetrad; Dark Triad; machiavellianism; narcissism; personality; Protective measures; Risk-taking; triad
6GJBNFAJ	journalArticle	2021	Ostrov, Barbara E.; Amsterdam, Daniel	Interplay of Anti-Viral Vaccines with Biologic Agents and Immunomodulators in Individuals with Autoimmune and Autoinflammatory Diseases	Immunological Investigations		0882-0139	10.1080/08820139.2021.1900863		Vaccines are an essential part of a preventative healthcare strategy. However, response to vaccines may be less predictable in immunocompromised people. While outcomes for individuals with autoimmune and autoinflammatory diseases have dramatically improved with treatment using immunomodulating and biologic agents, infections have caused significant morbidity in these people today often more than …	2021/10/3	2022/9/20 10:55	2022/9/20 10:55		833-856		7	50		Immunol. Invest.								English							Place: Philadelphia Publisher: Taylor & Francis Inc WOS:000647236100001				protection; influenza vaccine; safety; immunogenicity; antibody-response; immune-response; anti-viral vaccines; Autoimmune diseases; biologic therapy; immunomodulating therapy; inflammatory-bowel-disease; rheumatoid-arthritis patients; tofacitinib; virus vaccine
INBHZRR5	journalArticle	2021	Higuchi, Yusuke; Suzuki, Tatsuya; Arimori, Takao; Ikemura, Nariko; Mihara, Emiko; Kirita, Yuhei; Ohgitani, Eriko; Mazda, Osam; Motooka, Daisuke; Nakamura, Shota; Sakai, Yusuke; Itoh, Yumi; Sugihara, Fuminori; Matsuura, Yoshiharu; Matoba, Satoaki; Okamoto, Toru; Takagi, Junichi; Hoshino, Atsushi	Engineered ACE2 receptor therapy overcomes mutational escape of SARS-CoV-2	Nature Communications			10.1038/s41467-021-24013-y		SARS-CoV-2 has mutated during the global pandemic leading to viral adaptation to medications and vaccinations. Here we describe an engineered human virus receptor, ACE2, by mutagenesis and screening for binding to the receptor binding domain (RBD). Three cycles of random mutagenesis and cell sorting achieved sub-nanomolar affinity to RBD. Our structural data show that the enhanced affinity comes …	2021/6/21	2022/9/20 10:55	2022/9/20 10:55		3802		1	12		Nat. Commun.								English							Place: Berlin Publisher: Nature Portfolio WOS:000667248600003				model; covid-19; neutralizing antibodies; spike; binding; immunogenicity
KXJH3LPQ	journalArticle	2021	Ziello, Antonio; Scavone, Cristina; Di Battista, Maria Elena; Salvatore, Simona; Cesare, Daniele Di Giulio; Moreggia, Ornella; Allegorico, Lia; Sagnelli, Anna; Barbato, Stefano; Manzo, Valentino; Capuano, Annalisa; Maniscalco, Giorgia Teresa	Influenza Vaccine Hesitancy in Patients with Multiple Sclerosis: A Monocentric Observational Study	Brain Sciences			10.3390/brainsci11070890		Background. The so-called "vaccine hesitancy" still represents a common phenomenon that undermines the effectiveness of vaccination campaigns. In 2020, the Italian Medicines Agency recommended to bring forward the flu vaccination campaign, whose importance was also emphasized for patients with Multiple Sclerosis (MS). We aimed to assess vaccination behavior in patients with MS to prepare for the …	Jul-21	2022/9/20 10:55	2022/9/20 10:55		890		7	11		Brain Sci.								English							Place: Basel Publisher: Mdpi WOS:000676507500001				hesitancy; influenza vaccine; multiple sclerosis; observational study; relapses; viral-infections
GW9XHE87	journalArticle	2021	Fins, Joseph J.	Is Deliberative Democracy Possible During a Pandemic? Reflections of a Bioethicist	Journal of Theoretical and Philosophical Psychology		1068-8471	10.1037/teo0000191		In 1985, Governor Mario Cuomo established the New York State Task Force on Life and the Law to provide guidance on issues at the interface of medicine, ethics and the law. During its tenure, the Task Force has been the leading state-based commission in this space producing landmark reports on end-of-life care, physician-assisted suicide, genetic testing, newborn care, brain death, surrogate decis…	Nov-21	2022/9/20 10:55	2022/9/20 10:55		216-225		4	41		J. Theor. Philos. Psychol.								English							Place: Washington Publisher: Educational Publishing Foundation-American Psychological Assoc WOS:000718211000002				health policy; clinical ethics; COVID-19 surge in New York; deliberative democracy; New York State Task Force on Life and the Law
MTV49CJV	journalArticle	2022	Kant, Agnes; van Hunsel, Florence; van Puijenbroek, Eugene	Numbers of spontaneous reports: How to use and interpret?	British Journal of Clinical Pharmacology		0306-5251	10.1111/bcp.15024		Due to the high intensity of the COVID-19 vaccination campaigns and heightened attention for safety issues, the number of spontaneous reports has surged. In the Netherlands, pharmacovigilance centre Lareb has received more than 100 000 reports on adverse events following immunization (AEFI) associated with Covid-19 vaccination. It is tempting to interpret absolute numbers of reports of AEFIs in s…	Mar-22	2022/9/20 10:55	2022/9/20 10:55		1365-1368		3	88		Br. J. Clin. Pharmacol.								English							Place: Hoboken Publisher: Wiley WOS:000688526400001				vaccine; vaccines; AEFIs; disproportionality; pharmacovigilance; reporting odds ratio; signal detection; signal-detection
7WAF974A	journalArticle	2022	Tiglioglu, Pinar; Albayrak, Murat; Tiglioglu, Mesut; Ozturk, Hacer Berna Afacan; Aras, Merih Reis; Saglam, Bugra; Maral, Senem	The outcome of COVID-19 in patients with hematological malignancy	Memo-Magazine of European Medical Oncology		1865-5041	10.1007/s12254-021-00775-5		Objective The aim of this study was to examine the effect of coronavirus disease 2019 (COVID-19) on the malignancy-related clinical course and overall survival, and to determine the factors affecting mortality. Methods This retrospective study included 77 patients with hematological cancer and COVID-19. Patients were sub-grouped for analysis as survivors and non-survivors. Results COVID-19 was se…	Feb-22	2022/9/20 10:55	2022/9/20 10:55		83-89		1	15		Memo-Mag. Eur. Med. Oncol.								English							Place: Wien Publisher: Springer Wien WOS:000728447800001				mortality; risk; Coronavirus disease 2019; clinical characteristics; anemia; Cancer; Hematological malignancies; Hemoglobin; Platelet count
HPXFH733	journalArticle	2021	Markhorst, Berend; Zver, Tara; Malbasic, Nina; Dijkstra, Renze; Otto, Daan; van der Mei, Rob; Moeke, Dennis	A Data-Driven Digital Application to Enhance the Capacity Planning of the COVID-19 Vaccination Process	Vaccines			10.3390/vaccines9101181		In this paper, a decision support system (DSS) is presented that focuses on the capacity planning of the COVID-19 vaccination process in the Netherlands. With the Dutch national vaccination priority list as the starting point, the DSS aims to minimize the per-class waiting-time with respect to (1) the locations of the medical hubs (i.e., the vaccination locations) and (2) the distribution of the …	Oct-21	2022/9/20 10:55	2022/9/20 10:55		1181		10	9		Vaccines								English							Place: Basel Publisher: Mdpi WOS:000714473100001				covid-19; vaccines; decision support system; last-mile; vaccination logistics; vaccination planning
964SGQYE	journalArticle	2021	Smith, Megan A.; Burger, Emily A.; Castanon, Alejandra; de Kok, Inge M. C. M.; Hanley, Sharon J. B.; Rebolj, Matejka; Hall, Michaela T.; Jansen, Erik E. L.; Killen, James; O'Farrell, Xavier; Kim, Jane J.; Canfell, Karen	Impact of disruptions and recovery for established cervical screening programs across a range of high-income country program designs, using COVID-19 as an example: A modelled analysis	Preventive Medicine		0091-7435	10.1016/j.ypmed.2021.106623		COVID-19 has disrupted cervical screening in several countries, due to a range of policy-, health-service and participant-related factors. Using three well-established models of cervical cancer natural history adapted to simulate screening across four countries, we compared the impact of a range of standardised screening disruption scenarios in four countries that vary in their cervical cancer pr…	Oct-21	2022/9/20 10:55	2022/9/20 10:55		106623			151		Prev. Med.								English							Place: San Diego Publisher: Academic Press Inc Elsevier Science WOS:000668494400006				Coronavirus; covid-19; united-states; women; coverage; australia; cancer; aged 13-17 years; Cancer screening; Cervical cancer; Cervical screening; cost-effectiveness; elimination; human-papillomavirus vaccine; Modelling; services
EI4K9J69	journalArticle		Cokley, Kevin; Krueger, Nolan; Cunningham, Suzanne R.; Burlew, Kathleen; Hall, Shaina; Harris, Keoshia; Castelin, Stephanie; Coleman, Carly	The COVID-19/racial injustice syndemic and mental health among Black Americans: The roles of general and race-related COVID worry, cultural mistrust, and perceived discrimination	Journal of Community Psychology		0090-4392	10.1002/jcop.22747		This study explored intersecting concerns about COVID-19 and racial injustice against Black people in the United States using a syndemic perspective. Findings from a multistate COVID-19 needs assessment project examined the association of general and race-related concerns about COVID-19 and concerns about police violence against Black people with mental health symptoms in a sample of 2480 Black A…		2022/9/20 10:55	2022/9/20 10:55							J. Community Psychol.								English							Place: Hoboken Publisher: Wiley WOS:000720487900001				covid-19; disorders; anxiety; african-americans; cultural mistrust; depression; mediation; mental health; people; perceived discrimination; prevalence; racial-discrimination; stress; substance use
I9WPIK67	journalArticle	2021	Estadilla, Carlo Delfin S.; Uyheng, Joshua; De Lara-Tuprio, Elvira P.; Teng, Timothy Robin; Macalalag, Jay Michael R.; Estuar, Maria Regina Justina E.	Impact of vaccine supplies and delays on optimal control of the COVID-19 pandemic: mapping interventions for the Philippines	Infectious Diseases of Poverty		2095-5162	10.1186/s40249-021-00886-5		Background: Around the world, controlling the COVID-19 pandemic requires national coordination of multiple intervention strategies. As vaccinations are globally introduced into the repertoire of available interventions, it is important to consider how changes in the local supply of vaccines, including delays in administration, may be addressed through existing policy levers. This study aims to id…	2021/8/9	2022/9/20 10:55	2022/9/20 10:55		107		1	10		Infect. Dis. Poverty								English							Place: London Publisher: Bmc WOS:000683334300001				COVID-19 pandemic; efficacy; Vaccines; Non-pharmaceutical interventions; Optimal control; Philippines
GI7VRKYK	journalArticle	2021	Chavda, Vivek P.; Pandya, Radhika; Apostolopoulos, Vasso	DNA vaccines for SARS-CoV-2: toward third-generation vaccination era	Expert Review of Vaccines		1476-0584	10.1080/14760584.2021.1987223		Introduction: Coronavirus outbreak 2019 (COVID-19) has affected all the corners of the globe and created chaos to human life. In order to put some control on the pandemic, vaccines are urgently required that are safe, cost effective, easy to produce, and most importantly induce appropriate immune responses and protection against viral infection. DNA vaccines possess all these features and are pro…	2021/12/2	2022/9/20 10:55	2022/9/20 10:55		1549-1560		12	20		Expert Rev. Vaccines								English							Place: Abingdon Publisher: Taylor & Francis Ltd WOS:000712137400001				covid-19; SARS-CoV-2; vaccine; pandemic; immunization; virus; cancer; delivery; acute respiratory syndrome; construction; DNA vaccine; gene; genetic vaccine; injection; liposomes; nucleotide vaccines; poxviruses
U6HKU25E	journalArticle	2021	Dubanevics, Igors; McLeish, Tom C. B.	Computational analysis of dynamic allostery and control in the SARS-CoV-2 main protease	Journal of the Royal Society Interface		1742-5689	10.1098/rsif.2020.0591		The COVID-19 pandemic caused by the novel coronavirus SARS-CoV-2 has no publicly available vaccine or antiviral drugs at the time of writing. An attractive coronavirus drug target is the main protease (M-pro, also known as 3CL(pro)) because of its vital role in the viral cycle. A significant body of work has been focused on finding inhibitors which bind and block the active site of the main prote…	2021/1/27	2022/9/20 10:55	2022/9/20 10:55		20200591		174	18		J. R. Soc. Interface								English							Place: London Publisher: Royal Soc WOS:000608008600001				SARS-CoV-2; allostery; elastic network model; modes; protein dynamics
J5XC39IH	journalArticle	2021	Verrelli, Cristiano Maria; Della Rossa, Fabio	Two-Age-Structured COVID-19 Epidemic Model: Estimation of Virulence Parameters to Interpret Effects of National and Regional Feedback Interventions and Vaccination	Mathematics			10.3390/math9192414		The COVID-19 epidemic has recently led in Italy to the implementation of different external strategies in order to limit the spread of the disease in response to its transmission rate: strict national lockdown rules, followed first by a weakening of the social distancing and contact reduction feedback interventions and finally the implementation of coordinated intermittent regional actions, up to…	Oct-21	2022/9/20 10:55	2022/9/20 10:55		2414		19	9		Mathematics								English							Place: Basel Publisher: Mdpi WOS:000709569300001				parameter estimation; spread; COVID-19 epidemic; age; compartmental model; model identification; national lockdown; regional action; sensitivity analysis; vaccine prioritization strategy
4TVADWW3	journalArticle	2021	Pandey, Kabita; Thurman, Michellie; Johnson, Samuel D.; Acharya, Arpan; Johnston, Morgan; Klug, Elizabeth A.; Olwenyi, Omalla A.; Rajaiah, Rajesh; Byrareddy, Siddappa N.	Mental Health Issues During and After COVID-19 Vaccine Era	Brain Research Bulletin		0361-9230	10.1016/j.brainresbull.2021.08.012		The COVID-19 pandemic has persisted for more than a year, and post-COVID-19 sequelae of neurological complications, including direct and indirect effects on the central nervous system (CNS), have been recognized. There is a plethora of evidence for neurological, cognitive, and emotional deficits in COVID-19 patients. Acute neurological symptoms like neuroinflammation, cognitive impairment, loss o…	Nov-21	2022/9/20 10:55	2022/9/20 10:55		161-173			176		Brain Res. Bull.								English							Place: Oxford Publisher: Pergamon-Elsevier Science Ltd WOS:000697604500003				covid-19; SARS-CoV-2; united-states; vaccine; impact; metaanalysis; infections; risk; adolescents; mental health; childhood; consequences; neurobiology; recession; social determinants
PT6PKAJD	journalArticle	2021	Serban, Augustin; Mihai, Ancuta; Dima, Alina; Balaban, Daniel Vasile; Jinga, Mariana; Jurcut, Ciprian	The impact of the COVID-19 pandemic on patients with primary sjogren syndrome	Rheumatology International		0172-8172	10.1007/s00296-021-04967-4		The aim of this study was to investigate the perspective of Romanian patients with Sjogren syndrome (SS) on various aspects of the disease during the SARS-CoV-2 outbreak, including both the impact of COVID-19 on the disease itself as well as the effects of vaccination against SARS-CoV-2 in this group of patients. The study is an online questionnaire-based survey. We received responses from 137 SS…	Nov-21	2022/9/20 10:55	2022/9/20 10:55		1933-1940		11	41		Rheumatol. Int.								English							Place: Heidelberg Publisher: Springer Heidelberg WOS:000690697700002				covid-19; Vaccination; SARS-CoV2; Pandemic; Sjogren syndrome
63KI56CX	journalArticle	2021	Guerrini, Anita	Animals, vaccines, and COVID-19	Endeavour		0160-9327	10.1016/j.endeavour.2021.100779		Animals, especially mammals, have played a critical role in the COVID-19 pandemic. The COVID-19 virus originated in animals, and the virus can jump back and forth between humans and animals. Moreover, animals have been central to the development of the various vaccines against the virus now employed around the world, continuing a long history. The interrelationships between animals and humans in …	Sep-21	2022/9/20 10:55	2022/9/20 10:55		100779		3	45		Endeavour								English							Place: Oxford Publisher: Pergamon-Elsevier Science Ltd WOS:000697058700001				covid-19; influenza; Vaccines; Coronaviruses; Animals in science; One Health
ZZQNPDQI	journalArticle	2021	Sharker, Yushuf; Kenah, Eben	Estimating and interpreting secondary attack risk: Binomial considered biased	Plos Computational Biology		1553-734X	10.1371/journal.pcbi.1008601		Author summary The household secondary attack risk (SAR), often called the secondary attack rate or secondary infection risk, is the probability of infectious contact from an infectious household member A to a given household member B, where we define infectious contact to be a contact sufficient to infect B if he or she is susceptible. The most common statistical models used to estimate the SAR …	Jan-21	2022/9/20 10:55	2022/9/20 10:55		e1008601		1	17		PLoS Comput. Biol.								English							Place: San Francisco Publisher: Public Library Science WOS:000612395500003				model; disease; protection; coronavirus; epidemiology; association; pandemic influenza; a h1n1 virus; family; household transmission
PTN2ND4M	journalArticle	2021	Bernal, Jamie Lopez; Andrews, Nick; Gower, Charlotte; Gallagher, Eileen; Simmons, Ruth; Thelwall, Simon; Stowe, Julia; Tessier, Elise; Groves, Natalie; Dabrera, Gavin; Myers, Richard; Campbell, Colin N. J.; Amirthalingam, Gayatri; Edmunds, Matt; Zambon, Maria; Brown, Kevin E.; Hopkins, Susan; Chand, Meera; Ramsay, Mary	Effectiveness of Covid-19 Vaccines against the B.1.617.2 (Delta) Variant	New England Journal of Medicine		0028-4793	10.1056/NEJMoa2108891		Vaccine Effectiveness against Delta Covid-19 Variant The B.1.617.2 (delta) Covid-19 variant has surged in India and spread worldwide. In a test-negative case-control study, the effectiveness of two doses of BNT162b2 was 94% against the B.1.1.7 (alpha) variant and 88% against delta; with the ChAdOx1 nCoV-19 vaccine, effectiveness was 74% and 67%, respectively. Protection after a single vaccine inj…	2021/8/12	2022/9/20 10:55	2022/9/20 10:55		585-594		7	385		N. Engl. J. Med.								English							Place: Waltham Publisher: Massachusetts Medical Soc WOS:000675554200001				infection; workers; bnt162b2
MKQEIR3P	journalArticle		Ahvanooei, M. R. Rezaei; Norouzian, Mohammad Ali; Vahmani, Payam	Beneficial Effects of Vitamins, Minerals, and Bioactive Peptides on Strengthening the Immune System Against COVID-19 and the Role of Cow's Milk in the Supply of These Nutrients	Biological Trace Element Research		0163-4984	10.1007/s12011-021-03045-x		The COVID-19 pandemic, which causes severe respiratory tract infections in humans, has become a global health concern and is spreading rapidly. At present, the most important issue associated with COVID-19 is the immune system and the factors that affect it. It is well known that cow's milk is highly rich in micronutrients that increase and strengthen the immune system. Research shows that the ad…		2022/9/20 10:55	2022/9/20 10:55							Biol. Trace Elem. Res.								English							Place: London Publisher: Springernature WOS:000722978600001				covid-19; health; viral-infections; acute-inflammation; bovine-milk; copper; Cow milk; d deficiency; Immune system; iodine; Mineral; peripheral-blood lymphocytes; respiratory-tract; selenium; Vitamin
E98KIHDR	journalArticle	2021	Kim, Gyungah; Choi, Eun-Ji; Park, Han-Seung; Lee, Jung-Hee; Lee, Je-Hwan; Lee, Kyoo-Hyung	A Case Report of Immune Thrombocytopenia after ChAdOx1 nCoV-19 Vaccination	Journal of Korean Medical Science		1011-8934	10.3346/jkms.2021.36.e306		Immune thrombocytopenia (ITP) is an autoimmune condition characterized by platelet destruction through antibody-mediated mechanism. ITP is one of the manifestations of a coronavirus disease, as well as an adverse event occurring after vaccination against severe acute respiratory syndrome coronavirus 2 (SARS-CoV-2). Several cases of ITP have been described after vaccination with two mRNA-based vac…	2021/11/8	2022/9/20 10:55	2022/9/20 10:55		e306		43	36		J. Korean Med. Sci.								English							Place: Seoul Publisher: Korean Acad Medical Sciences WOS:000718125000004				covid-19; SARS-CoV-2; ChAdOx1 nCoV-19; Immune Thrombocytopenia
KWENDITS	journalArticle	2021	Braun, Peter; Braun, Julian; Woodcock, Barry G.	COVID-19: Predictions for SARS-CoV-2 vaccination on the course of the pandemic and critical occupancy of intensive-care facilities in Germany	International Journal of Clinical Pharmacology and Therapeutics		0946-1965	10.5414/CP203988		Aims of the study: To obtain predictions using the Modified Bateman SIZ Model for the effects of vaccination on the course of the COVID-19 pandemic in Germany. Materials and methods: Start parameters for the model were obtained from observational data after data-smoothing to reduce between-day variation. Three scenarios, 1) no vaccination, 2) vaccination of 60% of the population over 12 months, 3…	Apr-21	2022/9/20 10:55	2022/9/20 10:55		269-279		4	59		Int. J. Clin. Pharmacol. Ther.								English							Place: Deisenhofen-Muenchen Publisher: Dustri-Verlag Dr Karl Feistle WOS:000628747300002				prediction; COVID-19 disease; Germany; intensive-care units; modified-Bateman model SIZ Model; SARS-CoV-2 vaccination
YP6DK5FI	journalArticle	2021	Grothe, Christoph; Steffen, Falk; Bittner, Stefan	Humoral immune response and lymphocyte levels after complete vaccination against COVID-19 in a cohort of multiple sclerosis patients treated with cladribine tablets	Journal of Central Nervous System Disease		1179-5735	10.1177/11795735211060118		BACKGROUND: Patients with multiple sclerosis (MS) receiving immunomodulatory drugs were excluded from clinical trials on COVID-19 vaccines. Therefore, data regarding the efficacy of COVID-19 vaccines to induce humoral immunity in MS patients treated with B- and T-cell depleting agents is urgently warranted. Cladribine tablets are a high-efficacy disease-modifying treatment that exerts its therape…	Nov-21	2022/9/20 10:55	2022/9/20 10:55		1.17957E+16			13		J. Cent. Nerv. Syst. Dis.								English							Place: London Publisher: Sage Publications Ltd WOS:000727127900001				covid-19; SARS-CoV-2; multiple sclerosis; Cladribine tablets; humoral immune response; lymphopenia
FBEHLK8W	journalArticle	2021	Baj, Andreina; Novazzi, Federica; Drago Ferrante, Francesca; Genoni, Angelo; Tettamanzi, Elena; Catanoso, Giuseppe; Dalla Gasperina, Daniela; Dentali, Francesco; Focosi, Daniele; Maggi, Fabrizio	Spike protein evolution in the SARS-CoV-2 Delta variant of concern: a case series from Northern Lombardy	Emerging Microbes & Infections			10.1080/22221751.2021.1994356		The SARS-CoV-2 variant of concern (VOC) "Delta" is currently defined by PANGOLIN as a cluster of 33 different AY sublineages. Delta (in particular B.1.617.2) is largely and rapidly replacing the Alpha VOC as the dominant clade in most countries. To date, variations in the Spike protein of the Delta VOC have largely been limited. We report here the results of a genomic surveillance programme from …	2021/1/1	2022/9/20 10:55	2022/9/20 10:55		2010-2015		1	10		Emerg. Microbes Infect.								English							Place: Abingdon Publisher: Taylor & Francis Ltd WOS:000713425700001				SARS-CoV-2; b.1.617.2; c1238f; Delta; g769v; k854n; s71f; t250i; t572i
MQDM897T	journalArticle	2021	Xia, Dengning; Jin, Rui; Byagathvalli, Gaurav; Yu, Huan; Ye, Ling; Lu, Chao-Yi; Bhamla, M. Saad; Yang, Chinglai; Prausnitz, Mark R.	An ultra-low-cost electroporator with microneedle electrodes (ePatch) for SARS-CoV-2 vaccination	Proceedings of the National Academy of Sciences of the United States of America		0027-8424	10.1073/pnas.2110817118		Vaccination against severe acute respiratory syndrome coronavirus 2 (SARS-CoV-2) and other pathogens with pandemic potential requires safe, protective, inexpensive, and easily accessible vaccines that can be developed and manufactured rapidly at a large scale. DNA vaccines can achieve these criteria, but induction of strong immune responses has often required bulky, expensive electroporation devi…	2021/11/9	2022/9/20 10:55	2022/9/20 10:55		e2110817118		45	118		Proc. Natl. Acad. Sci. U. S. A.								English							Place: Washington Publisher: Natl Acad Sciences WOS:000720928400016				SARS-CoV-2; immunogenicity; cells; expression; COVID-19 DNA vaccine; dna vaccines; drug-delivery; electropermeabilization; gene-transfer; microneedle array; muscle; piezoelectricity; skin electroporation; transfection
APMGEL5M	journalArticle	2021	Rastegar, Mehdi; Tavana, Madjid; Meraj, Afshin; Mina, Hassan	An inventory-location optimization model for equitable influenza vaccine distribution in developing countries during the COVID-19 pandemic	Vaccine		0264-410X	10.1016/j.vaccine.2020.12.022		The addition of other respiratory illnesses such as flu could cripple the healthcare system during the coronavirus disease 2019 (COVID-19) pandemic. An annual seasonal influenza vaccine is the best way to help protect against flu. Fears of coronavirus have intensified the shortage of influenza shots in developing countries that hope to vaccinate many populations to reduce stress on their health s…	2021/1/15	2022/9/20 10:55	2022/9/20 10:55		495-504		3	39		Vaccine								English							Place: Oxford Publisher: Elsevier Sci Ltd WOS:000604750400008				united-states; design; Healthcare equitability; Influenza virus; Inventory-location problem; issues; Mixed-integer linear programming; supply chain; Vaccine supply chain
YVJ32QJQ	journalArticle	2021	Heinz, Franz X.; Stiasny, Karin	Profiles of current COVID-19 vaccines	Wiener Klinische Wochenschrift		0043-5325	10.1007/s00508-021-01835-w			Apr-21	2022/9/20 10:55	2022/9/20 10:55		271-283		7月8日	133		Wien. Klin. Wochen.								English							Place: Wien Publisher: Springer Wien WOS:000629450000001
UGILDBJI	journalArticle	2022	Zhang, Shaocheng; Chen, Shu; Xiao, Guangjun; Zhao, Mingcai; Li, Jia; Dong, Wenjuan; Hu, Juan; Yuan, Tianqi; Li, Yong; Liu, Lianghua	The associations between air pollutant exposure and neutralizing antibody titers of an inactivated SARS-CoV-2 vaccine	Environmental Science and Pollution Research		0944-1344	10.1007/s11356-021-16786-y		Air pollution is a critical risk factor for the prevalence of COVID-19. However, few studies have focused on whether air pollution affects the efficacy of the SARS-CoV-2 vaccine. To better guide the knowledge surrounding this vaccination, we conducted a cross-section study to identify the relationships between air pollutant exposure and plasma neutralizing antibody (NAb) titers of an inactivated …	Feb-22	2022/9/20 10:55	2022/9/20 10:55		13720-13728		9	29		Environ. Sci. Pollut. Res.								English							Place: Heidelberg Publisher: Springer Heidelberg WOS:000702635000011				disease; inflammation; efficacy; risk; Air pollutants; biomarkers; Chronic inflammation; Combined toxic effects; Healthcare workers; Inactivated SARS-CoV-2 vaccine; lead; metals; Neutralizing antibody titer; particulate matter; pm2.5; preschool-children
CMY5677J	journalArticle	2021	Borriello, Antonio; Master, Daniel; Pellegrini, Andrea; Rose, John M.	Preferences for a COVID-19 vaccine in Australia	Vaccine		0264-410X	10.1016/j.vaccine.2020.12.032		In absence of a COVID-19 vaccine, testing, contact tracing and social restrictions are among the most powerful strategies adopted around the world to slow down the spread of the pandemic. Citizens of most countries are suffering major physical, psychological and economic distress. At this stage, a safe and effective COVID-19 vaccine is the most sustainable option to manage the current pandemic. H…	2021/1/15	2022/9/20 10:55	2022/9/20 10:55		473-479		3	39		Vaccine								English							Place: Oxford Publisher: Elsevier Sci Ltd WOS:000604750400005				model; covid-19; hesitancy; influenza; impact; Vaccine; children; Uptake; Acceptance; Willingness to pay
SHAW6B7P	journalArticle	2021	Parry, Helen; Bruton, Rachel; Stephens, Christine; Brown, Kevin; Amirthalingam, Gayatri; Otter, Ashley; Hallis, Bassam; Zuo, Jianmin; Moss, Paul	Differential immunogenicity of BNT162b2 or ChAdOx1 vaccines after extended-interval homologous dual vaccination in older people	Immunity & Ageing		1742-4933	10.1186/s12979-021-00246-9		Background Several SARS-CoV-2 vaccines have shown clinical efficacy against Covid-19 infection but there remains uncertainty about the immune responses elicited by different regimens. This is a particularly important question for older people who are at increased clinical risk following infection and in whom immune senescence may limit vaccine responses. The BNT162b2 mRNA and ChAdOx1 adenovirus v…	2021/8/20	2022/9/20 10:55	2022/9/20 10:55		34		1	18		Immun. Ageing								English							Place: London Publisher: Bmc WOS:000687174800001				SARS-CoV-2; covid; Vaccination; mRNA; Antibody; Cellular; ChAdOx1; Meta-analysis
D6R9UVWM	journalArticle	2021	Koonpaew, Surapong; Kaewborisuth, Challika; Srisutthisamphan, Kanjana; Wanitchang, Asawin; Thaweerattanasinp, Theeradej; Saenboonrueng, Janya; Poonsuk, Sukontip; Jengarn, Juggragarn; Viriyakitkosol, Ratchanont; Kramyu, Jarin; Jongkaewwattana, Anan	A Single-Cycle Influenza A Virus-Based SARS-CoV-2 Vaccine Elicits Potent Immune Responses in a Mouse Model	Vaccines			10.3390/vaccines9080850		The use of virus-vectored platforms has increasingly gained attention in vaccine development as a means for delivering antigenic genes of interest into target hosts. Here, we describe a single-cycle influenza virus-based SARS-CoV-2 vaccine designated as scPR8-RBD-M2. The vaccine utilizes the chimeric gene encoding 2A peptide-based bicistronic protein cassette of the SARS-CoV-2 receptor-binding do…	Aug-21	2022/9/20 10:55	2022/9/20 10:55		850		8	9		Vaccines								English							Place: Basel Publisher: Mdpi WOS:000690176500001				SARS-CoV-2; system; protein; replication; generation; single-cycle influenza virus-based vaccine; spike RBD; spike-pseudotyped virus
LVLZWMS2	journalArticle	2021	Pratelli, Annamaria; Cirone, Francesco; Capozza, Paolo; Trotta, Adriana; Corrente, Marialaura; Balestrieri, Anna; Buonavoglia, Canio	Bovine respiratory disease in beef calves supported long transport stress: An epidemiological study and strategies for control and prevention	Research in Veterinary Science		0034-5288	10.1016/j.rvsc.2020.11.002		BRD is associated with infectious agents, but management and transport-stress are trigger factors. Metaphylactic administration of antimicrobial reduces colonization of respiratory tract by pathogens, but the development of antibiotic-resistance raises public health concerns leading to propose new control strategies. The study analyzed nasopharyngeal swabs of 231 imported cattle, 10% of 49 trucks…	Mar-21	2022/9/20 10:55	2022/9/20 10:55		450-455			135		Res. Vet. Sci.								English							Place: Oxford Publisher: Elsevier Sci Ltd WOS:000632845600024				Prevention; transport; Bovine coronavirus; brd; Cattle; Haemolytica; m
4AJYIWDU	journalArticle	2022	Lawal, Nafi'u; Bello, Muhammad Bashir; Yakubu, Yusuf; Ibrahim, Aliyu Musawa; Rabiu, Samira Anka	Appraisal of the knowledge, attitude, perception and practices among northern Nigerians in the wake of the COVID-19 outbreak	Future Science Oa		2056-5623	10.2144/fsoa-2021-0058		Aim: The aim of this study was to measure the knowledge, attitude, perception and practices of northern Nigerians toward the COVID-19 pandemic. Materials & methods: This was a questionnaire-based cross-sectional study and the data were analyzed using descriptive and inferential statistics. Results & discussions: There were 713 participants, of which 54.0, 57.4, 67.6, 36.2 and 28.9% were between 1…	Jan-22	2022/9/20 10:55	2022/9/20 10:55				1	8		Futur. Sci. OA								English							Place: London Publisher: Future Sci Ltd WOS:000724254500001				covid-19; attitude; knowledge; perception; practice; face masks; hygienic practices; origin; SARS-Cov2
JLNKGLUR	journalArticle	2022	Boufekane, Abdelmadjid; Busico, Gianluigi; Maizi, Djamel	Effects of temperature and relative humidity on the COVID-19 pandemic in different climates: a study across some regions in Algeria (North Africa)	Environmental Science and Pollution Research		0944-1344	10.1007/s11356-021-16903-x		After more than a year from the first confirmed cases of coronavirus (COVID-19) disease, the role of meteorological factors in the transmission of the virus still needs to be correctly determined. In this scenario of deep uncertainty, the present study aims to investigate the effects of temperature and relative humidity on daily new cases of COVID-19. For this purpose, the COVID-19's development …	Mar-22	2022/9/20 10:55	2022/9/20 10:55		18077-18102		12	29		Environ. Sci. Pollut. Res.								English							Place: Heidelberg Publisher: Springer Heidelberg WOS:000710092200010				covid-19; influenza; Climatic conditions; Relative humidity; Temperature
26WFR2W4	journalArticle	2021	Huang, Qingrui; Ji, Kai; Tian, Siyu; Wang, Fengze; Huang, Baoying; Tong, Zhou; Tan, Shuguang; Hao, Junfeng; Wang, Qihui; Tan, Wenjie; Gao, George F.; Yan, Jinghua	A single-dose mRNA vaccine provides a long-term protection for hACE2 transgenic mice from SARS-CoV-2	Nature Communications			10.1038/s41467-021-21037-2		The rapid expansion of the COVID-19 pandemic has made the development of a SARS-CoV-2 vaccine a global health and economic priority. Taking advantage of versatility and rapid development, three SARS-CoV-2 mRNA vaccine candidates have entered clinical trials with a two-dose immunization regimen. However, the waning antibody response in convalescent patients after SARS-CoV-2 infection and the emerg…	2021/2/3	2022/9/20 10:55	2022/9/20 10:55		776		1	12		Nat. Commun.								English							Place: Berlin Publisher: Nature Portfolio WOS:000617330000020				infection; mers; antibody-responses
DSXPMKBU	journalArticle	2021	Senokoane, Boitumelo B.	The devil, 666 and the COVID-19 vaccine	Hts Teologiese Studies-Theological Studies		0259-9422	10.4102/hts.v77i1.6924		This article aims to engage the statement of the South African Chief Justice Mogoeng Mogoeng where he made a direct link between the Covid-19 vaccine, the devil and triple-six. The article will try to locate his argument; but above that to engage the statement in relationship to the biblical text of Revelation 13:11-18, which is where the original statement is. There will be an attempt to underst…	2021/11/17	2022/9/20 10:55	2022/9/20 10:55		e6924		1	77		HTS Teol. Stud.-Theol. Stud.								English							Place: Cape Town Publisher: Aosis WOS:000730824500001				Covid-19; science; 666; beast; context; faith; reason; religion; revelation
R463ZA88	journalArticle	2021	Abebe, Haimanot; Shitu, Solomon; Mose, Ayenew	Understanding of COVID-19 Vaccine Knowledge, Attitude, Acceptance, and Determinates of COVID-19 Vaccine Acceptance Among Adult Population in Ethiopia	Infection and Drug Resistance		1178-6973	10.2147/IDR.S312116		Introduction: Although many vaccines are in development and clinical trials, and at least seven vaccines have been distributed worldwide, the world has faced a huge challenge in line with the willingness to accept a COVID-19 vaccine in a different country including Ethiopia. However, no study has been conducted on the knowledge, attitudes, acceptance, and determinates of COVID-19 vaccine acceptan…	2021	2022/9/20 10:55	2022/9/20 10:55		2015-2025			14		Infect. Drug Resistance								English							Place: Albany Publisher: Dove Medical Press Ltd WOS:000658380500001				acceptance; vaccine; attitudes; knowledge; Ethiopia
AZHTY2KE	journalArticle	2021	Belingheri, Michael; Ausili, Davide; Paladino, Maria Emilia; Luciani, Michela; Di Mauro, Stefania; Riva, Michele A.	Attitudes towards COVID-19 vaccine and reasons for adherence or not among nursing students	Journal of Professional Nursing		8755-7223	10.1016/j.profnurs.2021.07.015		Background: The COVID-19 pandemic has spread widely among healthcare workers. Recently, new effective vaccines against COVID-19 have begun to be administered to healthcare workers in several countries, including Italy. Purpose: Our aim was to evaluate the intentions to be vaccinated against COVID-19 in a population of nursing students, identifying factors associated with the intentions. Method: W…	Oct-21	2022/9/20 10:55	2022/9/20 10:55		923-927		5	37		J. Prof. Nurs.								English							Place: Philadelphia Publisher: W B Saunders Co-Elsevier Inc WOS:000709199700018				Coronavirus; covid-19; hesitancy; Vaccine hesitancy; Vaccine; coronavirus disease 2019; exposure; Healthcare student; Nursing student
QMD9E7GM	journalArticle	2022	Mohr-Sasson, A.; Haas, J.; Abuhasira, S.; Sivan, M.; Amdurski, H. Doitch; Dadon, T.; Blumenfeld, S.; Derazne, E.; Hemi, R.; Orvieto, R.; Afek, A.; Rabinovici, J.	The effect of Covid-19 mRNA vaccine on serum anti-Mullerian hormone levels	Human Reproduction		0268-1161	10.1093/humrep/deab282		STUDY QUESTION Does the administration of the severe acute respiratory syndrome coronavirus 2 (SARS-CoV-2) mRNA vaccine have an association with ovarian reserve as expressed by circulating anti-Mullerian hormone (AMH) levels? SUMMARY ANSWER Ovarian reserve as assessed by serum AMH levels is not altered at 3 months following mRNA SARS-CoV-2 vaccination. WHAT IS KNOWN ALREADY A possible impact of S…	2022/3/1	2022/9/20 10:55	2022/9/20 10:55		534-541		3	37		Hum. Reprod.								English							Place: Oxford Publisher: Oxford Univ Press WOS:000756748300001				Covid-19; receptor; anti-Mullerian hormone; fertility; ovarian reserve; SARS-CoV-2 mRNA vaccine
VLZMIUE9	journalArticle	2021	Chan, Wing-Lok; Ho, Yuen-Hung Tricia; Wong, Carlos King-Ho; Choi, Horace Cheuk-Wai; Lam, Ka-On; Yuen, Kwok-Keung; Kwong, Dora; Hung, Ivan	Acceptance of COVID-19 Vaccination in Cancer Patients in Hong Kong: Approaches to Improve the Vaccination Rate	Vaccines			10.3390/vaccines9070792		Emerging efficacy and safety data have led to the authorization of COVID-19 vaccines worldwide, but most trials excluded patients with active malignancies. This study evaluates the intended acceptance of COVID-19 vaccination in cancer patients in Hong Kong. Methods: 660 adult cancer patients received a survey, in paper or electronic format, between 31 January 2021 and 15 February 2021. The survey…	Jul-21	2022/9/20 10:55	2022/9/20 10:55		792		7	9		Vaccines								English							Place: Basel Publisher: Mdpi WOS:000677146100001				covid-19; acceptance; vaccination; anxiety; cancer
6KNYTDUA	journalArticle	2021	Dobano, Carlota; Vidal, Marta; Santano, Rebeca; Jimenez, Alfons; Chi, Jordi; Barrios, Diana; Ruiz-Olalla, Gemma; Rodrigo Melero, Natalia; Carolis, Carlo; Parras, Daniel; Serra, Pau; Martinez de Aguirre, Paula; Carmona-Torre, Francisco; Reina, Gabriel; Santamaria, Pere; Mayor, Alfredo; Garcia-Basteiro, Alberto L.; Izquierdo, Luis; Aguilar, Ruth; Moncunill, Gemma	Highly Sensitive and Specific Multiplex Antibody Assays To Quantify Immunoglobulins M, A, and G against SARS-CoV-2 Antigens	Journal of Clinical Microbiology		0095-1137	10.1128/JCM.01731-20		Reliable serological tests are required to determine the prevalence of antibodies against severe acute respiratory syndrome coronavirus 2 (SARS-CoV-2) and to characterize immunity to the disease in order to address key knowledge gaps in the coronavirus disease 2019 (COVID-19) pandemic. Quantitative suspension array technology (qSAT) assays based on the xMAP Luminex platform overcome the limitatio…	Feb-21	2022/9/20 10:55	2022/9/20 10:55		e01731-20		2	59		J. Clin. Microbiol.								English							Place: Washington Publisher: Amer Soc Microbiology WOS:000610235700012				covid-19; SARS-CoV-2; coronavirus; IgG; IgM; nucleocapsid; spike; immunity; rbd; infection; sensitivity; immunoassay; immune-response; sars coronavirus; antibody; IgA; Luminex; multiplex; performance; quantitative suspension array technology; specificity; spike proteins; syndrome-associated coronavirus
WSJCLEUW	journalArticle	2021	Zhou, Shuli; Zhou, Suhong; Zheng, Zhong; Lu, Junwen	Optimizing Spatial Allocation of COVID-19 Vaccine by Agent-Based Spatiotemporal Simulations	Geohealth		2471-1403	10.1029/2021GH000427		Optimizing allocation of vaccine, a highly scarce resource, is an urgent and critical issue during fighting against on-going COVID-19 epidemic. Prior studies suggested that vaccine should be prioritized by age and risk groups, but few of them have considered the spatial prioritization strategy. This study aims to examine the spatial heterogeneity of COVID-19 transmission in the city naturally, an…	Jun-21	2022/9/20 10:55	2022/9/20 10:55		e2021GH000427		6	5		GeoHealth								English							Place: Washington Publisher: Amer Geophysical Union WOS:000665063900008				spread; contacts; impact; china; human mobility; mathematical-theory; prioritization; transmission dynamics
NT4H6V9W	journalArticle	2021	Warimwe, George M.; Francis, Michael J.; Bowden, Thomas A.; Thumbi, Samuel M.; Charleston, Bryan	Using cross-species vaccination approaches to counter emerging infectious diseases	Nature Reviews Immunology		1474-1733	10.1038/s41577-021-00567-2		Since the initial use of vaccination in the eighteenth century, our understanding of human and animal immunology has greatly advanced and a wide range of vaccine technologies and delivery systems have been developed. The COVID-19 pandemic response leveraged these innovations to enable rapid development of candidate vaccines within weeks of the viral genetic sequence being made available. The deve…	Dec-21	2022/9/20 10:55	2022/9/20 10:55		814-821		12	21		Nat. Rev. Immunol.								English							Place: Berlin Publisher: Nature Portfolio WOS:000662805300001				impact; antibodies; crystal-structure; bcg; t-cells; animal health; brucellosis; food security; gamma-delta; smallpox
MLWQJ8GX	journalArticle	2021	Bradley, Valerie C.; Kuriwaki, Shiro; Isakov, Michael; Sejdinovic, Dino; Meng, Xiao-Li; Flaxman, Seth	Unrepresentative big surveys significantly overestimated US vaccine uptake	Nature		0028-0836	10.1038/s41586-021-04198-4		Surveys are a crucial tool for understanding public opinion and behaviour, and their accuracy depends on maintaining statistical representativeness of their target populations by minimizing biases from all sources. Increasing data size shrinks confidence intervals but magnifies the effect of survey bias: an instance of the Big Data Paradox(1). Here we demonstrate this paradox in estimates of firs…	2021/12/23	2022/9/20 10:55	2022/9/20 10:55		695-+		7890	600		Nature								English							Place: Berlin Publisher: Nature Portfolio WOS:000728552800009				bias
N4YVVFDB	journalArticle	2022	Antonucci, Francescopaolo; Fiore, Jose Ramon; De Feo, Lucia; Granato, Tommaso; Di Stefano, Mariantonietta; Faleo, Giuseppina; Farhan, Ahmed Mohamed; Margaglione, Maurizio; Centra, Michele; Santantonio, Teresa Antonia	Increased SARS-CoV-2 seroprevalence in healthy blood donors after the second pandemic wave in South-Eastern Italy: evidence for asymptomatic young donors as potential virus spreaders	Infectious Diseases		2374-4235	10.1080/23744235.2021.2003856		Background Italy experienced SARS-CoV-2 spread during the second wave and the southern regions were severely affected. In this prospective study, we assessed the changes in SARS-CoV-2 seroprevalence rates in non-vaccinated blood donors to evaluate the spread of SARS-CoV-2 among healthy individuals in our geographical area. Methods 8,183 healthy blood donors visiting the Transfusion Centre at the …	2022/4/3	2022/9/20 10:55	2022/9/20 10:55		241-246		4	54		Infect. Dis.								English							Place: Abingdon Publisher: Taylor & Francis Ltd WOS:000719188900001				covid-19; SARS-CoV-2; antibodies; seroprevalence; asymptomatic patients; blood donors
BRJ6XUK4	journalArticle	2021	Purvis, Rachel S.; Hallgren, Emily; Moore, Ramey A.; Willis, Don E.; Hall, Spencer; Gurel-Headley, Morgan; McElfish, Pearl A.	Trusted Sources of COVID-19 Vaccine Information among Hesitant Adopters in the United States	Vaccines			10.3390/vaccines9121418		The World Health Organization has identified vaccine hesitancy as a top health concern. Emerging research shows that those who are hesitant may still get vaccinated; however, little is known about those who say they are hesitant but still get vaccinated. Most people have high trust in several sources of COVID-19 information, and trust in certain information sources such as the Centers for Disease…	Dec-21	2022/9/20 10:55	2022/9/20 10:55		1418		12	9		Vaccines								English							Place: Basel Publisher: Mdpi WOS:000742892300001				covid-19; COVID-19 vaccine; vaccine hesitancy; definition; trusted sources
6Z7KPDZ2	journalArticle	2021	Sparrow, Erin; Wood, James G.; Chadwick, Christopher; Newall, Anthony T.; Torvaldsen, Siranda; Moen, Ann; Torelli, Guido	Global production capacity of seasonal and pandemic influenza vaccines in 2019	Vaccine		0264-410X	10.1016/j.vaccine.2020.12.018		Vaccines will be an important element in mitigating the impact of an influenza pandemic. While research towards developing universal influenza vaccines is ongoing, the current strategy for vaccine supply in a pandemic relies on seasonal influenza vaccine production to be switched over to pandemic vaccines. Understanding how much vaccine could be produced, in which regions of the world and in what…	2021/1/15	2022/9/20 10:55	2022/9/20 10:55		512-520		3	39		Vaccine								English							Place: Oxford Publisher: Elsevier Sci Ltd WOS:000604750400010				immunization; Vaccine; Influenza; Pandemic; Capacity; challenges; h5n1 vaccines; Production; Seasonal; technology-transfer
9HRHHP5Y	journalArticle	2021	Ahmed, Imran; Ahmad, Misbah; Rodrigues, Joel J. P. C.; Jeon, Gwanggil; Din, Sadia	A deep learning-based social distance monitoring framework for COVID-19	Sustainable Cities and Society		2210-6707	10.1016/j.scs.2020.102571		The ongoing COVID-19 corona virus outbreak has caused a global disaster with its deadly spreading. Due to the absence of effective remedial agents and the shortage of immunizations against the virus, population vulnerability increases. In the current situation, as there are no vaccines available; therefore, social distancing is thought to be an adequate precaution (norm) against the spread of the…	Feb-21	2022/9/20 10:55	2022/9/20 10:55		102571			65		Sust. Cities Soc.								English							Place: Amsterdam Publisher: Elsevier WOS:000615907800002				covid-19; Deep learning; Overhead view; Person detection; Social distancing; tracking; Transfer learning; YOLOv3
4MCMYWHR	journalArticle	2022	Jacobson, Karen B.; Pinsky, Benjamin A.; Rath, Maria E. Montez; Wang, Hannah; Miller, Jacob A.; Skhiri, Mehdi; Shepard, John; Mathew, Roshni; Lee, Grace; Bohman, Bryan; Parsonnet, Julie; Holubar, Marisa	Post-Vaccination Severe Acute Respiratory Syndrome Coronavirus 2 (SARS-CoV-2) Infections and Incidence of the Presumptive B.1.427/B.1.429 Variant Among Healthcare Personnel at a Northern California Academic Medical Center	Clinical Infectious Diseases		1058-4838	10.1093/cid/ciab554		Background Although mRNA-based severe acute respiratory syndrome coronavirus 2 (SARS-CoV-2) vaccines report >90% efficacy, breakthrough infections occur. Little is known about their effectiveness against SARS-CoV-2 variants, including the highly prevalent B.1.427/B.1.429 variant. Methods In this quality improvement project, we collected demographic and clinical information from post-vaccine SARS-…	2022/3/9	2022/9/20 10:55	2022/9/20 10:55		821-828		5	74		Clin. Infect. Dis.								English							Place: Cary Publisher: Oxford Univ Press Inc WOS:000755827800001				covid-19; workers; b.1.427/b.1.429; breakthrough COVID-19; l452r; post-vaccination SARS-CoV-2; SARS-CoV-2 variant
NEWL6ZAQ	journalArticle	2021	Pastorino, Roberta; Villani, Leonardo; Mariani, Marco; Ricciardi, Walter; Graffigna, Guendalina; Boccia, Stefania	Impact of COVID-19 Pandemic on Flu and COVID-19 Vaccination Intentions among University Students	Vaccines			10.3390/vaccines9020070		Flu vaccination for the general population, and specifically for vulnerable subgroups, brings the potential to reduce the impact of the COVID-19 pandemic in terms of mobility, mortality, and hospitalizations. In Italy, flu vaccination is recommended to all >= 6 months of age, even if it is only free of charge for specific categories. We investigated the intentions towards flu and COVID-19 vaccina…	Feb-21	2022/9/20 10:55	2022/9/20 10:55		70		2	9		Vaccines								English							Place: Basel Publisher: Mdpi WOS:000623317500001				COVID-19 vaccination; flu vaccination; students
PSG3M88A	journalArticle	2021	Wang, Gang; Hu, Guangli; Liang, Rui; Shi, Jiale; Qiu, Xiuxiu; Yang, Yiling; Jiao, Zhe; Chen, Yixi; Shen, Zhou; Li, Mengxia; Shi, Yuejun; Mao, Junfu; Peng, Guiqing	Establishment of Full-Length cDNA Clones and an Efficient Oral Infection Model for Feline Coronavirus in Cats	Journal of Virology		0022-538X	10.1128/JVI.00745-21		Feline infectious peritonitis virus (FIPV) is the etiologic agent of feline infectious peritonitis (FIP) and causes fatal disease in cats of almost all ages. Currently, there are no clinically approved drugs or effective vaccines for FIP. Furthermore, the pathogenesis of FIP is still not fully understood. There is an urgent need for an effective infection model of feline infectious peritonitis in…	Nov-21	2022/9/20 10:55	2022/9/20 10:55		e00745-21		21	95		J. Virol.								English							Place: Washington Publisher: Amer Soc Microbiology WOS:000708640200010				disease; vaccine; protection; protein; gene; antibody-dependent enhancement; deletion; feline infectious peritonitis virus; pathogenesis; pathogenicity; peritonitis virus; reverse genetics
7GNGXCMS	journalArticle	2021	Zahradnik, Jiri; Marciano, Shir; Shemesh, Maya; Zoler, Eyal; Harari, Daniel; Chiaravalli, Jeanne; Meyer, Bjorn; Rudich, Yinon; Li, Chunlin; Marton, Ira; Dym, Orly; Elad, Nadav; Lewis, Mark G.; Andersen, Hanne; Gagne, Matthew; Seder, Robert A.; Douek, Daniel C.; Schreiber, Gideon	SARS-CoV-2 variant prediction and antiviral drug design are enabled by RBD in vitro evolution	Nature Microbiology		2058-5276	10.1038/s41564-021-00954-4		Evolution of the SARS-CoV-2 spike protein receptor-binding domain in vitro recapitulates SARS-CoV-2 variant emergence and produces an effective antiviral spike receptor-binding domain variant. SARS-CoV-2 variants of interest and concern will continue to emerge for the duration of the COVID-19 pandemic. To map mutations in the receptor-binding domain (RBD) of the spike protein that affect binding …	Sep-21	2022/9/20 10:55	2022/9/20 10:55		1188-+		9	6		NAT. MICROBIOL								English							Place: Berlin Publisher: Nature Portfolio WOS:000685403600001				ace2; system; cryo-em structure; tools; yeast transformation
NMDQJCRL	journalArticle	2021	Craft, Joshua F.; Travassos, Mark A.; Palacios, Carlo Foppiano; Openshaw, John J.	Inadequate Minority Representation within SARS-CoV-2 Vaccine Trials	American Journal of Tropical Medicine and Hygiene		0002-9637	10.4269/ajtmh.20-1294		Minority communities have borne the brunt of COVID-19 disease in the United States. Nonwhites have contracted most of the SARS-CoV-2 infections; COVID-19 mortality rates for Black Americans are more than twice those for whites. Given this, studying the most effective ways to prevent and treat SARS-CoV-2 in these populations should be a research priority, particularly with respect to vaccine trial…	Jan-21	2022/9/20 10:55	2022/9/20 10:55		32-34		1	104		Am. J. Trop. Med. Hyg.								English							Place: Mclean Publisher: Amer Soc Trop Med & Hygiene WOS:000615234800008				polio vaccine
3N9G3R8E	journalArticle	2021	Rosen, Osnat; Jayson, Avital; Natan, Niva; Monash, Arik; Girshengorn, Meni; Goldvaser, Michael; Levin, Lilach; Epstein, Eyal	Novel method for quantifying cells on carriers and its demonstration during SARS-2 vaccine development	Biotechnology and Bioengineering		0006-3592	10.1002/bit.27856		The most effective way to prevent and control infectious disease outbreak is through vaccines. The increasing use of vaccines has elevated the need to establish new manufacturing strategies. One of the major approaches is cell-based production, which creates a need for high cell density to enable higher cell production levels. This has led to development of the technology of cell carriers, includ…	Oct-21	2022/9/20 10:55	2022/9/20 10:55		3811-3820		10	118		Biotechnol. Bioeng.								English							Place: Hoboken Publisher: Wiley WOS:000661583500001				vaccine; cells; Alamar blue; Fibra-Cel; growth; lines; macro-carriers; quantification
V8EZWL2G	journalArticle	2021	Stricker, Raphael B.; Fesler, Melissa C.	Hydroxychloroquine Pre-Exposure Prophylaxis for COVID-19 in Healthcare Workers from India: A Meta-Analysis	Journal of Infection and Public Health		1876-0341	10.1016/j.jiph.2021.08.001		To date, the COVID-19 pandemic has resulted in more than 200 million cases of SARS-CoV-2 infection and more than four million deaths world-wide. 1 Although novel COVID-19 vaccines have become clinically available, the safety and efficacy of these vaccines remains open to question. 2 Alternate approaches to prevention of disease have received little attention, and one medication, hydroxychloroquin…	Sep-21	2022/9/20 10:55	2022/9/20 10:55		1161-1163		9	14		J. Infect. Public Health								English							Place: London Publisher: Elsevier Science London WOS:000700595800007				covid-19; SARS-CoV-2; Vaccine; Hydroxychloroquine; Pre-exposure prophylaxis
EFXG33FX	journalArticle	2021	Xu, Yunyun; Xu, Dongjuan; Luo, Liyan; Ma, Fengqiao; Wang, Ping; Li, Hongfei; Li, Qing; Wei, Lianyan; Diao, Jiuzhou; Liu, Yuanyuan; Zhang, Weiqiang; Zheng, Xiaolei	A Cross-Sectional Survey on COVID-19 Vaccine Hesitancy Among Parents From Shandong vs. Zhejiang	Frontiers in Public Health			10.3389/fpubh.2021.779720		Introduction: With the approval of COVID-19 vaccinations for children and adolescents in China, parental vaccine hesitancy will emerge as a new challenge with regard to the administration of these vaccines. However, little is known regarding this hesitancy as well as regional differences that may exist between parents from Shandong vs. Zhejiang.Methods: To assess these issues, an online survey wa…	2021/11/5	2022/9/20 10:55	2022/9/20 10:55		779720			9		Front. Public Health								English							Place: Lausanne Publisher: Frontiers Media Sa WOS:000720157200001				covid-19; children; confidence; pacv; parental vaccine hesitancy; refusal; Shandong; Zhejiang
M2UA7KV4	journalArticle	2021	Candido Moreira, Maria Rosilene; Bernardo Candido, Jose Auricelio; Alexandre, Severino Ferreira; Costa Torres, Geanne Maria; Bezerra dos Santos, Cicero Marcelo; Costa, Milena Silva	Categories of fake news about COVID-19 disseminated in the first year of the pandemic in Brazil	Mundo Da Saude		0104-7809	10.15343/0104-7809.202145221232		The objective of this study was to analyze the false news about COVID-19 disseminated in Brazil during the first year of the pandemic in the country. This was a documentary type study, which investigated the fake news inserted in the Coronaverificado.news platform until February 27, 2021, totaling 938 news items, which were submitted to the IRaMuTeQ software, resulting in the Descending Hierarchi…	Dec-21	2022/9/20 10:55	2022/9/20 10:55		221-232		1	45		Mundo Saude								English							Place: Sao Paulo Publisher: Centro Univ Sao Camilo WOS:000688531500021				covid-19; False Information; Social Media
YDDKP58C	journalArticle	2021	Soysal, Gonca; Durukan, Elif; Akdur, Recep	The Evaluation of Vaccine Hesitancy and Refusal for Childhood Vaccines and the COVID-19 Vaccine in Individuals Aged Between 18 and 25 Years	Turkish Journal of Immunology		1301-109X	10.4274/tji.galenos.2021.35229		Objective: The aim of this study is to determine vaccine hesitancy and refusal for childhood vaccines and the Coronavirus disease-2019 (COVID-19) vaccine in individuals aged between 18 and 25 years and the affecting factors. Materials and Methods: In this descriptive study, an online questionnaire was implemented on 1.033 people aged between 18 and 25 years and living in Turkey between January 28…	2021	2022/9/20 10:55	2022/9/20 10:55		120-127		3	9		Turk. J. Immunol.								English							Place: Istanbul Publisher: Galenos Publ House WOS:000734647100004				COVID-19 vaccine; Vaccine hesitancy; vaccine acceptance; vaccine refusal; childhood vaccines
QU7TR27R	journalArticle	2021	Love, Jay; Keegan, Lindsay T.; Angulo, Frederick J.; McLaughlin, John; Shea, Kimberly M.; Swerdlow, David L.; Samore, Matthew H.; Toth, Damon J. A.	Continued need for non-pharmaceutical interventions after COVID-19 vaccination in long-term-care facilities	Scientific Reports		2045-2322	10.1038/s41598-021-97612-w		Long-term care facilities (LTCFs) bear disproportionate burden of COVID-19 and are prioritized for vaccine deployment. LTCF outbreaks could continue occurring during vaccine rollout due to incomplete population coverage, and the effect of vaccines on viral transmission are currently unknown. Declining adherence to non-pharmaceutical interventions (NPIs) against within-facility transmission could …	2021/9/10	2022/9/20 10:55	2022/9/20 10:55		18093		1	11		Sci Rep								English							Place: Berlin Publisher: Nature Portfolio WOS:000694868000053				states
VFFBXFYJ	journalArticle	2021	Hennrich, Alexandru A.; Sawatsky, Bevan; Santos-Mandujano, Rosalia; Banda, Dominic H.; Oberhuber, Martina; Schopf, Anika; Pfaffinger, Verena; Wittwer, Kevin; Riedel, Christiane; Pfaller, Christian K.; Conzelmann, Karl-Klaus	Safe and effective two-in-one replicon-and-VLP minispike vaccine for COVID-19: Protection of mice after a single immunization	Plos Pathogens		1553-7366	10.1371/journal.ppat.1009064		Vaccines of outstanding efficiency, safety, and public acceptance are needed to halt the current SARS-CoV-2 pandemic. Concerns include potential side effects caused by the antigen itself and safety of viral DNA and RNA delivery vectors. The large SARS-CoV-2 spike (S) protein is the main target of current COVID-19 vaccine candidates but can induce non-neutralizing antibodies, which might cause vac…	Apr-21	2022/9/20 10:55	2022/9/20 10:55		e1009064		4	17		PLoS Pathog.								English							Place: San Francisco Publisher: Public Library Science WOS:000643934700002				coronavirus; spike; infection; neutralizing antibody; vesicular stomatitis-virus; cryo-em structure; cell entry; glycoprotein; matrix protein; rabies virus
KUWH4XAC	journalArticle	2021	Alexandrova, Radostina; Beykov, Pencho; Vassilev, Dobrin; Jukic, Marko; Podlipnik, Crtomir	The virus that shook the world: questions and answers about SARS-CoV-2 and COVID-19	Biotechnology & Biotechnological Equipment		1310-2818	10.1080/13102818.2020.1847683		SARS-CoV-2 is an emerging human beta-coronavirus that caused the COVID-19 (Coronavirus Disease - 19) pandemic, the most significant health and social crisis in the last 100 years. SARS-CoV-2 is not only a respiratory virus; the symptoms of COVID-19 can include gastrointestinal, neurological, renal, cardiovascular and other complications. A large part of SARS-CoV-2 infected individuals are asympto…	2021/1/1	2022/9/20 10:55	2022/9/20 10:55		74-102		1	35		Biotechnol. Biotechnol. Equip.								English							Place: Abingdon Publisher: Taylor & Francis Ltd WOS:000596872300001				covid-19; SARS-CoV-2; vaccine; vaccines; infection; Coronaviruses; sars; replication; immune-response; spike glycoprotein; acute respiratory syndrome; ivermectin; model systems; receptor axis; syndrome coronavirus; therapeutical agents
XBWY6X4A	journalArticle	2021	Portuguese, Andrew Jay; Sunga, Cassandra; Kruse-Jarres, Rebecca; Gernsheimer, Terry; Abkowitz, Janis	Autoimmune- and complement-mediated hematologic condition recrudescence following SARS-CoV-2 vaccination	Blood Advances		2473-9529	10.1182/bloodadvances.2021004957		A variety of autoimmune disorders have been reported after viral illnesses and specific vaccinations. Cases of de novo immune thrombocytopenia (ITP) have been reported after SARS-CoV-2 vaccination, although its effect on preexisting ITP has not been well characterized. In addition, although COVID-19 has been associated with complement dysregulation, the effect of SARS-CoV-2 vaccination on preexis…	2021/7/13	2022/9/20 10:55	2022/9/20 10:55		2794-2798		13	5		Blood Adv.								English							Place: Amsterdam Publisher: Elsevier WOS:000672759900016				risk; immune thrombocytopenic purpura
ZD4YH8N2	journalArticle	2021	Toker, Huriye	How Loud and Clear Rung the Alarm Bell: The Communication Efforts of WHO on the Beginning of COVID-19 Outbreak	International Journal of Health Services		0020-7314	10.1177/00207314211024902		As seen clearly from the coronavirus disease 2019 (COVID-19) pandemic, health is an important foreign policy and diplomatic issue connected with security, economic well-being, and international development. According to risk communication researchers, effective, transparent, and timely information sharing is the most important tool after vaccines for responding to pandemics. This study aims to st…	Oct-21	2022/9/20 10:55	2022/9/20 10:55		423-435		4	51		Int. J. Health Serv.								English							Place: London Publisher: Sage Publications Ltd WOS:000664275300001				covid-19; content analysis; who; news releases; risk communication
79AYWBVJ	journalArticle	2021	Brill, Livnat; Rechtman, Ariel; Zveik, Omri; Haham, Nitzan; Oiknine-Djian, Esther; Wolf, Dana G.; Levin, Netta; Raposo, Catarina; Vaknin-Dembinsky, Adi	Humoral and T-Cell Response to SARS-CoV-2 Vaccination in Patients With Multiple Sclerosis Treated With Ocrelizumab	Jama Neurology		2168-6149	10.1001/jamaneurol.2021.3599		IMPORTANCE B-cell-depleting therapies may affect the development of a protective immune response following vaccination. Understanding the ability to develop vaccine-specific immunity to COVID-19 in patients with multiple sclerosis (MS) treated with B-cell-depleting therapy is of importance for clinical decisions. OBJECTIVE To assess SARS-CoV-2 vaccine-specific humoral and cellular responses in pa…	Dec-21	2022/9/20 10:55	2022/9/20 10:55		1510-1514		12	78		JAMA Neurol.								English							Place: Chicago Publisher: Amer Medical Assoc WOS:000698779400002
TUE4MPUM	journalArticle	2021	Morens, David M.; Taubenberger, Jeffery K.; Fauci, Anthony S.	A Centenary Tale of Two Pandemics: The 1918 Influenza Pandemic and COVID-19, Part II	American Journal of Public Health		0090-0036	10.2105/AJPH.2021.306326		Both the 1918 influenza pandemic and the 2019-2021 COVID-19 pandemic are among the most disastrous infectious disease emergences of modern times. In addition to similarities in their clinical, pathological, and epidemiological features, the two pandemics, separated by more than a century, were each met with essentially the same, or very similar, public health responses, and elicited research effo…	Jul-21	2022/9/20 10:55	2022/9/20 10:55		1267-1272		7	111		Am. J. Public Health								English							Place: Washington Publisher: Amer Public Health Assoc Inc WOS:000744577300013				pneumonia; death
KRM4SD6H	journalArticle	2021	Weitzman, Elissa R.; Sherman, Amy C.; Levy, Ofer	SARS-CoV-2 mRNA Vaccine Attitudes as Expressed in US FDA Public Commentary: Need for a Public-Private Partnership in a Learning Immunization System	Frontiers in Public Health			10.3389/fpubh.2021.695807		As part of the U.S. Food and Drug Administration COVID-19 vaccine review process, public commentary was solicited offering an opportunity to reflect on vaccine attitudes that may impact the uptake of coronavirus vaccines. We identified themes in the commentary that highlighted the safety, efficacy, ethics, and trustworthiness and transparency regarding the novel mRNA COVID-19 vaccines. A "Learnin…	2021/7/16	2022/9/20 10:55	2022/9/20 10:55		695807			9		Front. Public Health								English							Place: Lausanne Publisher: Frontiers Media Sa WOS:000680035300001				covid-19; mRNA vaccine; challenges; ethics; immunization policy and strategies; public attitudes; public commentary
LD4BR9UH	journalArticle	2022	Ekizoglu, Esme; Gezegen, Hasim; Yalinay Dikmen, Pinar; Orhan, Elif Kocasoy; Ertas, Mustafa; Baykan, Betul	The characteristics of COVID-19 vaccine-related headache: Clues gathered from the healthcare personnel in the pandemic	Cephalalgia		0333-1024	10.1177/03331024211042390		Introduction Headache is a frequent adverse event after viral vaccines. We aimed to investigate the frequency and clinical associations of COVID-19 vaccine-related headache. Methods The characteristics, associations of this headache, main comorbidities, headache history following the influenza vaccine and during COVID-19 were investigated using a web-based questionnaire. Results A total of 1819 h…	Apr-22	2022/9/20 10:55	2022/9/20 10:55		366-375		4月5日	42		Cephalalgia								English							Place: London Publisher: Sage Publications Ltd WOS:000695334200001				vaccine; COVID-19 vaccine; vaccination; influenza vaccine; safety; immunogenicity; association; adverse event; headache
C3VZZQ7Z	journalArticle	2021	Pandey, Anoop Kumar; Singh, Vijay; Dwivedi, Apoorva	Comparative study of molecular docking, structural, electronic, vibrational and hydrogen bonding interactions on 4-hydroxy benzo hydrazide (4HBH) and its newly designed derivative [(E)-N '-((1H-Pyrrol-2-YL)methylene)-4-hydroxy benzo hydrazide and its isomers (I, II and III)] (potential inhibitors) for COVID-19 protease	Main Group Chemistry		1024-1221	10.3233/MGC-210039		Studies have shown that hydrazides and thier derivatives are used for pharmaceutical and medicinal purposes. At present, the whole world is suffering for COVID-19 virus. There are some vaccines or medicines available to treat this disease all over the world. Today the one fourth of the world's population is under lockdown condition. In this scenario, scientists from the whole world are doing diff…	2021	2022/9/20 10:55	2022/9/20 10:55		295-315		3	20		Main Group Chem.								English							Place: Amsterdam Publisher: Ios Press WOS:000705980000007				molecular docking; prediction; acid; ab-initio; AIM analysis; Anti-COVID-19 activity; aqueous solubility; density; dft; energy distribution; ft-raman; homo-lumo; hyper polarizability; mesp; polarizability; spectra; spectroscopy; vibrational specrtroscopic analysis
GZVIDE74	journalArticle	2021	Chew, Nicholas W. S.; Cheong, Clare; Kong, Gwyneth; Phua, Kailun; Ngiam, Jinghao Nicholas; Tan, Benjamin Y. Q.; Wang, Bokun; Hao, Fengyi; Tan, Wanqiu; Han, Xiaofan; Tran, Bach X.; Hoang, Men Thi; Pham, Hai Q.; Vu, Giang T.; Chen, Yang; Danuaji, Rivan; Rn, Komalkumar; Pv, Meenakshi; Talati, Kalpesh; Ho, Cyrus S.; Sharma, Arvind K.; Ho, Roger C.; Sharma, Vijay K.	An Asia-Pacific study on healthcare workers' perceptions of, and willingness to receive, the COVID-19 vaccination	International Journal of Infectious Diseases		1201-9712	10.1016/j.ijid.2021.03.069		Objective: In the fight against COVID-19, vaccination is vital in achieving herd immunity. Many Asian countries are starting to vaccinate frontline workers; however, expedited vaccine development has led to hesitancy among the general population. We evaluated the willingness of healthcare workers to receive the COVID-19 vaccine. Methods: From 12 to 21 December 2020, we recruited 1720 healthcare w…	May-21	2022/9/20 10:55	2022/9/20 10:55		52-60			106		Int. J. Infect. Dis.								English							Place: Oxford Publisher: Elsevier Sci Ltd WOS:000652855300011				hesitancy; COVID-19 vaccination; trust; Healthcare workers; dengue vaccine; scale; trials
B3Q7TZBH	journalArticle	2021	Li, Lily; Robinson, Lacey B.; Patel, Rajesh; Landman, Adam B.; Fu, Xiaoqing; Shenoy, Erica S.; Hashimoto, Dean M.; Banerji, Aleena; Wickner, Paige G.; Samarakoon, Upeka; Mancini, Christian M.; Zhang, Yuqing; Blumenthal, Kimberly G.	Association of Self-reported High-Risk Allergy History With Allergy Symptoms After COVID-19 Vaccination	Jama Network Open		2574-3805	10.1001/jamanetworkopen.2021.31034		IMPORTANCE Allergic history in individuals with confirmed anaphylaxis to a messenger RNA (mRNA) COVID-19 vaccine is common. However, the risk factors for allergy symptoms after receiving the vaccine are unknown. OBJECTIVE To assess the association between self-reported history of high-risk allergy and self-reported allergic reactions after mRNA COVID-19 vaccination of health care employees. DESIG…	2021/10/26	2022/9/20 10:55	2022/9/20 10:55		e2131034		10	4		JAMA Netw. Open								English							Place: Chicago Publisher: Amer Medical Assoc WOS:000712526800005				advisory-committee; practices interim recommendation; united-states; children; comorbidity; moderna; update
86DU6CF8	journalArticle	2021	Bologna, Lydia; Stamidis, Katherine; Paige, Sarah; Solomon, Roma; Bisrat, Filimona; Kisanga, Anthony; Usman, Samuel; Arale, Ahmed	Why Communities Should Be the Focus to Reduce Stigma Attached to COVID-19	American Journal of Tropical Medicine and Hygiene		0002-9637	10.4269/ajtmh.20-1329		Since 1999, the CORE Group Polio Project (CGPP) has developed, refined, and deployed effective strategies to mobilize communities to improve vaccine uptake for polio (and other vaccine-preventable diseases such as measles) and conduct surveillance for infectious disease threats in high-risk, border, and hard-to-reach locations. CORE Group Polio Project teams have been called upon to address the C…	Jan-21	2022/9/20 10:55	2022/9/20 10:55		39-44		1	104		Am. J. Trop. Med. Hyg.								English							Place: Mclean Publisher: Amer Soc Trop Med & Hygiene WOS:000615234800010				trust; group polio project
DE7DVGI5	journalArticle	2021	Ediriweera, Yashodha; Banks, Jennifer; Hall, Leanne; Heal, Clare	A Randomised Controlled Trial of Ice to Reduce the Pain of Immunisation-The ICE Trial	Tropical Medicine and Infectious Disease			10.3390/tropicalmed6030158		Background and objectives: vaccine injections are a common cause of iatrogenic pain and anxiety, contributing to non-compliance with scheduled vaccinations. With injection-related pain being recognised as a barrier to vaccination uptake in both adults and children, it is important to investigate strategies to effectively reduce immunisation pain. This prospective randomised controlled trial inves…	Sep-21	2022/9/20 10:55	2022/9/20 10:55		158		3	6		Trop. Med. Infect. Dis.								English							Place: Basel Publisher: Mdpi WOS:000701205500001				vaccination; vaccinations; injection; analgesia; cold therapy; general practice; osteoarthritis; primary health care
F67LWWEF	journalArticle	2021	Byttebier, Geert; Belmans, Luc; Alexander, Myriam; Saxberg, Bo E. H.; De Spiegeleer, Bart; De Spiegeleer, Anton; Devreker, Nick; Van Praet, Jens T.; Vanhove, Karolien; Reybrouck, Reinhilde; Wynendaele, Evelien; Fedson, David S.	Hospital mortality in COVID-19 patients in Belgium treated with statins, ACE inhibitors and/or ARBs	Human Vaccines & Immunotherapeutics		2164-5515	10.1080/21645515.2021.1920271		The COVID-19 pandemic has disrupted life throughout the world. Newly developed vaccines promise relief to people who live in high-income countries, although vaccines and expensive new treatments are unlikely to arrive in time to help people who live in low-and middle-income countries. The pathogenesis of COVID-19 is characterized by endothelial dysfunction. Several widely available drugs like sta…	2021/9/2	2022/9/20 10:55	2022/9/20 10:55		2841-2850		9	17		Human Vaccines Immunother.								English							Place: Philadelphia Publisher: Taylor & Francis Inc WOS:000655897500001				covid-19; mortality; statins; trials; ACE inhibitors; angiotensin receptor blockers; case-control; immunometabolism; propensity score
[truncated: 9,892 more rows]
[truncated: 37 more columns]
