# Supplementary material for: A Bibliometric Visualization Analysis on Vaccine Development of Coronavirus Disease 2019 (COVID-19)
Source: Vaccines (Basel). 2023 Jan 29;11(2):295. doi: 10.3390/vaccines11020295 (PMC9959778; doi:10.3390/vaccines11020295)
Supplement: Supplementary file 1 [file vaccines-11-00295-s001.zip › Appendix S5 data from WOS core collection database download published in 2022_5508.csv]

Key	Item Type	Publication Year	Author	Title	Publication Title	ISBN	ISSN	DOI	Url	Abstract Note	Date	Date Added	Date Modified	Access Date	Pages	Num Pages	Issue	Volume	Number Of Volumes	Journal Abbreviation	Short Title	Series	Series Number	Series Text	Series Title	Publisher	Place	Language	Rights	Type	Archive	Archive Location	Library Catalog	Call Number	Extra	Notes	File Attachments	Link Attachments	Manual Tags	Automatic Tags	Editor	Series Editor	Translator	Contributor	Attorney Agent	Book Author	Cast Member	Commenter	Composer
3NCF4WC3	journalArticle	2022	Demir, Ender; Kizys, Renatas; Rouatbi, Wael; Zaremba, Adam	Sail Away to a Safe Harbor? COVID-19 Vaccinations and the Volatility of Travel and Leisure Companies	Journal of Risk and Financial Management		1911-8066	10.3390/jrfm15040182		This paper examines the impact of vaccination programs on the stock market volatility of the travel and leisure sector. Using daily data from 56 countries over the period from January 2020 to March 2021, we find that vaccination leads to a decrease in the investment risk of travel and leisure companies. Vaccination results in a decrease in the volatility of stock prices of travel and leisure comp…	Apr-22	2022/9/20 11:15	2022/9/20 11:15		182		4	15		J. Risk Financ. Manag.								English							Place: Basel Publisher: Mdpi WOS:000787008400001				covid-19; industry; pandemic; risk; stock market volatility; stock-market volatility; travel and leisure; vaccinations
BANGCNCR	journalArticle	2022	Youngster, Michal; Avraham, Sarit; Yaakov, Odelia; Rabbi, Moran Landau; Gat, Itai; Yerushalmi, Gil; Sverdlove, Rachael; Baum, Micha; Maman, Ettie; Hourvitz, Ariel; Kedem, Alon	IVF under COVID-19: treatment outcomes of fresh ART cycles	Human Reproduction		0268-1161	10.1093/humrep/deac043		STUDY QUESTION Does prior severe acute respiratory syndrome coronavirus-2 (SARS-CoV-2) infection in women undergoing fertility treatments affect the outcomes of fresh ART cycles? SUMMARY ANSWER SARS-CoV-2 infection does not affect fresh ART treatment outcomes, except for a possible long-term negative effect on oocyte yield (>180 days postinfection). WHAT IS KNOWN ALREADY A single previous study s…	2022/5/3	2022/9/20 11:15	2022/9/20 11:15		947-953		5	37		Hum. Reprod.								English							Place: Oxford Publisher: Oxford Univ Press WOS:000767402500001				covid-19; angiotensin-(1-7); converting enzyme type-2; growth; infertility; ivf; oocytes; oxidative stress; pregnancy; receptor mas; SARS-CoV-2; sars-cov-2 infection
JCKPFTA5	journalArticle	2022	Couture, Alexia; Lyons, B. Casey; Mehrotra, Megha L.; Sosa, Lynn; Ezike, Ngozi; Ahmed, Farah S.; Brown, Catherine M.; Yendell, Stephanie; Azzam, Ihsan A.; Katic, Bozena J.; Cope, Anna; Dickerson, Kristen; Stone, Jolianne; Traxler, L. Brannon; Dunn, John R.; Davis, Lora B.; Reed, Carrie; Clarke, Kristie E. N.; Flannery, Brendan; Charles, Myrna D.	Severe Acute Respiratory Syndrome Coronavirus 2 Seroprevalence and Reported Coronavirus Disease 2019 Cases in US Children, August 2020-May 2021	Open Forum Infectious Diseases		2328-8957	10.1093/ofid/ofac044		Background Case-based surveillance of pediatric coronavirus disease 2019 (COVID-19) cases underestimates the prevalence of severe acute respiratory syndrome coronavirus 2 (SARS-CoV-2) infections among children and adolescents. Our objectives were to estimate monthly SARS-CoV-2 antibody seroprevalence and calculate ratios of SARS-CoV-2 infections to reported COVID-19 cases among children and adole…	2022/3/1	2022/9/20 11:15	2022/9/20 11:15		ofac044		3	9		Open Forum Infect. Dis.								English							Place: Cary Publisher: Oxford Univ Press Inc WOS:000758366100007				covid-19; SARS-CoV-2; advisory-committee; county; covid-19 vaccine; elementary-schools; infection; interim recommendation; pediatric; sars-cov-2 transmission; secondary transmission; seroprevalence; surveillance; united-states
SEDH9WPC	journalArticle	2022	Arumahandi de Silva, Amanthi Nadira; Frommert, Leonie Maria; Albach, Fredrik N.; Klotsche, Jens; Scholz, Veronika; Jeworowski, Lara Maria; Schwarz, Tatjana; ten Hagen, Alexander; Zernicke, Jan; Corman, Victor Max; Drosten, Christian; Burmester, Gerd-Ruediger; Biesen, Robert	Pausing methotrexate improves immunogenicity of COVID-19 vaccination in elderly patients with rheumatic diseases	Annals of the Rheumatic Diseases		0003-4967	10.1136/annrheumdis-2021-221876		Objective To study the effect of methotrexate (MTX) and its discontinuation on the humoral immune response after COVID-19 vaccination in patients with autoimmune rheumatic diseases (AIRD). Methods In this retrospective study, neutralising SARS-CoV-2 antibodies were measured after second vaccination in 64 patients with AIRD on MTX therapy, 31 of whom temporarily paused medication without a fixed r…	Jun-22	2022/9/20 11:15	2022/9/20 11:15		881-888		6	81		Ann. Rheum. Dis.								English							Place: London Publisher: Bmj Publishing Group WOS:000769626000001				covid-19; arthritis; autoimmune diseases; bnt162b2; discontinuation; methotrexate; responses; vaccination
IBZ8LAAA	journalArticle	2022	Ciceron, Annie Coriolan; Jeon, Min Jeong; Monroe, Anne Kress; Clausen, Michelle Elise; Magnus, Manya; Le, Daisy	HPV knowledge, screening barriers and facilitators, and sources of health information among women living with HIV: perspectives from the DC community during the COVID-19 pandemic	Bmc Womens Health			10.1186/s12905-022-01689-y		Background High-risk human papillomavirus (HPV) causes 99% of cervical cancer cases. Despite available prevention methods through the HPV vaccine and two screening modalities, women continue to die from cervical cancer worldwide. Cervical cancer is preventable, yet affects a great number of women living with HIV (WLH). Low screening rates among WLH further exacerbate their already high risk of de…	2022/4/9	2022/9/20 11:15	2022/9/20 11:15		110		1	22		BMC Womens Health								English							Place: London Publisher: Bmc WOS:000781338600004				cancer prevention knowledge; HPV knowledge; Screening; Sources of health information
VVBWY7CC	journalArticle		Ng, Siew C.; Peng, Ye; Zhang, Lin; Mok, Chris K. P.; Zhao, Shilin; Li, Amy; Ching, Jessica Y. L.; Liu, Yingzhi; Yan, Shuai; Chan, Dream L. S.; Zhu, Jie; Chen, Chunke; Fung, Adrian C. C.; Wong, Kenneth K. Y.; Hui, David S. C.; Chan, Francis K. L.; Tun, Hein M.	Gut microbiota composition is associated with SARS-CoV-2 vaccine immunogenicity and adverse events	Gut		0017-5749	10.1136/gutjnl-2021-326563		Objective The gut microbiota plays a key role in modulating host immune response. We conducted a prospective, observational study to examine gut microbiota composition in association with immune responses and adverse events in adults who have received the inactivated vaccine (CoronaVac; Sinovac) or the mRNA vaccine (BNT162b2; BioNTech; Comirnaty). Design We performed shotgun metagenomic sequencin…		2022/9/20 11:15	2022/9/20 11:15							Gut								English							Place: London Publisher: Bmj Publishing Group WOS:000754021900001				covid-19; bnt162b2; responses; enteric bacterial microflora; immune response; impact; messenger-rna
4UTJ6KM5	journalArticle		Ernest, C. Steven; Chien, Jenny Y.; Patel, Dipak R.; Chigutsa, Emmanuel	PK/PD modeling links accelerated resolution of COVID-19-related clinical symptoms to SARS-CoV-2 viral load reduction in patients following treatment with Bamlanivimab alone or Bamlanivimab and Etesevimab together	Cpt-Pharmacometrics & Systems Pharmacology		2163-8306	10.1002/psp4.12784		The relationship between severe acute respiratory syndrome-coronavirus 2 (SARS-CoV-2) viral load reduction and disease symptom resolution remains largely undefined for coronavirus disease 2019 (COVID-19). While the vaccine-derived immunity takes time to develop, neutralizing monoclonal antibodies offer immediate, passive immunity to patients with COVID-19. Bamlanivimab and etesevimab are two pote…		2022/9/20 11:15	2022/9/20 11:15							CPT-PHARMACOMET. SYST. PHARMACOL.								English							Place: Hoboken Publisher: Wiley WOS:000778231300001
BEIVGP5R	journalArticle		Shechtman, Liran; Lahad, Karney; Livneh, Avi; Grossman, Chagai; Druyan, Amit; Giat, Eitan; Lidar, Merav; Freund, Sarit; Manor, Uri; Pomerantz, Alon; Veroslavski, Daniel; Ben-Zvi, Ilan	Safety of the BNT162b2 mRNA COVID-19 vaccine in patients with familial Mediterranean fever	Rheumatology		1462-0324	10.1093/rheumatology/keac131		Objectives Evidence suggests a possible association between the COVID-19 vaccine and autoimmune disease flares or new onset of various autoinflammatory manifestations, such as pericarditis and myocarditis. The objective of this study was to assess the safety of an mRNA-based BNT162b2 anti-COVID-19 vaccine in individuals with FMF, a prototypic autoinflammatory disease. Methods Patients participati…		2022/9/20 11:15	2022/9/20 11:15							RHEUMATOLOGY								English							Place: Oxford Publisher: Oxford Univ Press WOS:000770423900001				covid-19; fmf; mRNA; vaccine
HE2DADUM	journalArticle	2022	Arumugam, Murugesan; Najimudeen, Raleena Begum Haja; Vijayan, Arya; Sathyamoorthy, Bhuvaneshwari; Patole, Prashant S.	A cross-sectional study of COVID-19 outbreak in Indian population	Annals of Medicine and Surgery		2049-0801	10.1016/j.amsu.2022.103554		Background: Presently India is the second most populous country in the world with an estimated population of 1.4 billion people and has recently been affected by COVID-19 pandemic and subsequent mutant viral outbreak. To date, India has administered its population with over 1.30 billion cumulative doses of COVID-19 vaccine. The consequences of COVID-19 vaccination on the outbreak in India has not…	Apr-22	2022/9/20 11:15	2022/9/20 11:15		103554			76		Ann. Med. Surg.								English							Place: Oxford Publisher: Elsevier Sci Ltd WOS:000794359300001				covid-19; Impact of vaccination; India; Outbreak; safety; Vaccination
CJLHRUFI	journalArticle	2022	Wang, Yaxin; Xu, Binghong; Ma, Sen; Wang, Hao; Shang, Luqing; Zhu, Cheng; Ye, Sheng	Discovery of SARS-CoV-2 3CL(Pro) Peptidomimetic Inhibitors through the Catalytic Dyad Histidine-Specific Protein-Ligand Interactions	International Journal of Molecular Sciences			10.3390/ijms23042392		As the etiological agent for the coronavirus disease 2019, severe acute respiratory syndrome coronavirus 2 (SARS-CoV-2) challenges the ongoing efforts of vaccine development and drug design. Due to the accumulating cases of breakthrough infections, there are urgent needs for broad-spectrum antiviral medicines. Here, we designed and examined five new tetrapeptidomimetic anti-SARS-CoV-2 inhibitors …	Feb-22	2022/9/20 11:15	2022/9/20 11:15		2392		4	23		Int. J. Mol. Sci.								English							Place: Basel Publisher: Mdpi WOS:000762477000001				SARS-CoV-2; covalent inhibitor; force-field; molecular dynamics simulations; molecule design; tool
AWCMFS3T	journalArticle	2022	Dhand, Abhay; Razonable, Raymund R.	COVID-19 and Solid Organ Transplantation: Role of Anti-SARS-CoV-2 Monoclonal Antibodies	Current Transplantation Reports			10.1007/s40472-022-00357-2		Purpose of Review Solid organ transplant recipients (SOTRs) are ideal candidates for early treatment or prevention of coronavirus disease 2019 (COVID-19) using anti-SARS-CoV-2 monoclonal antibodies because of multiple underlying medical conditions, chronic immune-suppression, sub-optimal immunogenic response to vaccination, and evolving epidemiological risks. In this article, we review pertinent …	Mar-22	2022/9/20 11:15	2022/9/20 11:15		26-34		1	9		Curr. Transplant. Rep.								English							Place: London Publisher: Springernature WOS:000742837300001				covid-19; vaccination; Coronavirus; Monoclonal antibody; Passive immunity; therapy; Transplant
GJ3M5E34	journalArticle	2022	Perinet, Simone; Cadieux, Genevieve; Mercure, Sarah-Amelie; Drouin, Mylene; Allard, Robert	Analysis of COVID-19 Risk Following a Ring Vaccination Intervention to Address SARS-CoV-2 Alpha Variant Transmission in Montreal, Canada	Jama Network Open		2574-3805	10.1001/jamanetworkopen.2021.47042		IMPORTANCE Given limited COVID-19 vaccine availability early in the pandemic, optimizing immunization strategies was of paramount importance. Ring vaccination has been used successfully to control transmission of other airborne respiratory viruses. OBJECTIVE To assess the association of a ring vaccination intervention on COVID-19 spread in the initial epicenter of SARS-CoV-2 Alpha variant transmi…	2022/2/11	2022/9/20 11:15	2022/9/20 11:15		e2147042		2	5		JAMA Netw. Open								English							Place: Chicago Publisher: Amer Medical Assoc WOS:000754036600002
NG4JCR8F	journalArticle	2022	Lan, Fan-Yun; Sidossis, Amalia; Iliaki, Eirini; Buley, Jane; Nathan, Neetha; Bruno-Murtha, Lou Ann; Kales, Stefanos N.	Continued effectiveness of COVID-19 vaccination among urban healthcare workers during delta variant predominance	Bmc Infectious Diseases			10.1186/s12879-022-07434-y		Background Data on COVID-19 vaccine effectiveness (VE) among healthcare workers (HCWs) during periods of delta variant predominance are limited. Methods We followed a population of urban Massachusetts HCWs (45% non-White) subject to epidemiologic surveillance. We accounted for covariates such as demographics and community background infection incidence, as well as information bias regarding COVID…	2022/5/12	2022/9/20 11:15	2022/9/20 11:15		457		1	22		BMC Infect. Dis.								English							Place: London Publisher: Bmc WOS:000794885600004				SARS-CoV-2; covid; Immunity; Immunization; Real-world evidence; Vaccine
R5REPDAP	journalArticle	2022	Ayyagari, Vijaya Sai	Design of siRNA molecules for silencing of membrane glycoprotein, nucleocapsid phosphoprotein, and surface glycoprotein genes of SARS-CoV2	Journal of Genetic Engineering and Biotechnology		2090-5920	10.1186/s43141-022-00346-z		The global COVID-19 pandemic caused by SARS-CoV2 infected millions of people and resulted in more than 4 million deaths worldwide. Apart from vaccines and drugs, RNA silencing is a novel approach for treating COVID-19. In the present study, siRNAs were designed for the conserved regions targeting three structural genes, M, N, and S, from forty whole-genome sequences of SARS-CoV2 using four differ…	2022/4/28	2022/9/20 11:15	2022/9/20 11:15		65		1	20		J Genet. Eng. Biotechnol.								English							Place: London Publisher: Springernature WOS:000788607300003				covid-19; tool; computational approach; identification; Membrane glycoprotein; mers-cov; Nucleocapsid phosphoprotein; prediction; rna; SARS-CoV2; selection; server; siRNA; siRNA design tools; Surface glycoprotein; validation
IVJE2M72	journalArticle	2022	Joudi, Maryam; Moradi Binabaj, Maryam; Porouhan, Pejman; PeyroShabany, Babak; Tabasi, Mohsen; Fazilat-Panah, Danial; Khajeh, Mahtab; Mehrabian, Arezoo; Dehghani, Mansoureh; Welsh, James S.; Keykhosravi, Batol; Akbari Yazdi, Azam; Ariamanesh, Mona; Ghasemi, Ahmad; Ferns, Gordon; Javadinia, Seyed Alireza	A Cohort Study on the Immunogenicity and Safety of the Inactivated SARS-CoV-2 Vaccine (BBIBP-CorV) in Patients With Breast Cancer; Does Trastuzumab Interfere With the Outcome?	Frontiers in Endocrinology		1664-2392	10.3389/fendo.2022.798975		AimTo determine the efficacy and safety of inactivated SARS-CoV-2 vaccine (BBIBP-CorV) in patients with breast cancer. MethodsIn this multi- institutional cohort study, a total of 160 breast cancer patients (mean age of 50.01 +/- 11.5 years old) were assessed for the SARS-CoV-2 Anti-Spike IgG and SARS-CoV2 Anti RBD IgG by ELISA after two doses of 0.5 mL inactivated, COVID-19 vaccine (BBIBP-CorV).…	2022/3/1	2022/9/20 11:15	2022/9/20 11:15		798975			13		Front. Endocrinol.								English							Place: Lausanne Publisher: Frontiers Media Sa WOS:000773680800001				SARS-CoV2; breast cancer; cancer; chemotherapy; COVID-19 vaccine; immune-system; inactivated SARS-CoV-2 vaccine; Iran; malignancy; mortality; seroconversion; statistics
LIKB47IH	journalArticle	2022	Sonderskov, Kim Mannemar; Vistisen, Helene Tilma; Dinesen, Peter Thisted; Ostergaard, Soren Dinesen	A positive update on COVID-19 booster vaccine willingness among Danes	Danish Medical Journal					INTRODUCTION. Based on survey data from September 2021, we recently reported that an estimated 90% (weighted total) of vaccinated (completed or scheduled) adult Danes were also willing to receive a COVID-19 booster vaccine, once offered. This survey was, however, fielded before booster vaccination was recommended to the general adult population in Denmark, which may have resulted in an underestim…	Feb-22	2022/9/20 11:15	2022/9/20 11:15		A01220047		2	69		Dan. Med. J.								English							Place: Copenhagen Publisher: Danish Medical Assoc WOS:000750967100003
HB57JFWX	journalArticle	2022	Schaefer, Moritz; Wijaya, Karunia Putra; Rockenfeller, Robert; Goetz, Thomas	The impact of travelling on the COVID-19 infection cases in Germany	Bmc Infectious Diseases			10.1186/s12879-022-07396-1		Background COVID-19 continues to disrupt social lives and the economy of many countries and challenges their healthcare capacities. Looking back at the situation in Germany in 2020, the number of cases increased exponentially in early March. Social restrictions were imposed by closing e.g. schools, shops, cafes and restaurants, as well as borders for travellers. This reaped success as the infecti…	2022/5/12	2022/9/20 11:15	2022/9/20 11:15		455		1	22		BMC Infect. Dis.								English							Place: London Publisher: Bmc WOS:000794885600001				covid-19; bic; Disease dynamics; Epidemiology; Metropolis algorithm; Parameter estimation; Reproduction number; restrictions; SEIRD-model; Sensitivity analysis; Travellers
MJSMWPML	journalArticle	2022	Liu, Binjian; Su, Xibin; Yu, George; Yang, Shuling; Wang, Feng; Huang, Tao; Zhou, Liuyong; Hui, Zhiqiang; Liao, Yixian; Qiu, Yuan; Huang, Juan; Gao, Hong; Liu, Justin; Zhong, Yaoqi	An automated chemiluminescent immunoassay (CLIA) detects SARS-CoV-2 neutralizing antibody levels in COVID-19 patients and vaccinees	International Journal of Infectious Diseases		1201-9712	10.1016/j.ijid.2021.12.316		Objectives: A specific and sensitive automated chemiluminescent immunoassay (CLIA) was developed to detect neutralizing antibody (NAb) levels. This assay can be used for the diagnosis of severe acute respiratory syndrome coronavirus-2 (SARS-CoV-2) infection, treatment and vaccine evaluation. Methods: The SARS-CoV-2 receptor-binding domain (RBD) and a stabilized version of the spike ectodomain as …	Feb-22	2022/9/20 11:15	2022/9/20 11:15		116-125			115		Int. J. Infect. Dis.								English							Place: Oxford Publisher: Elsevier Sci Ltd WOS:000787774100019				Chemiluminescent immunoassay; Mathematical model; Microneutralization test; Neutralizing antibody; SARS-CoV-2 vaccine
HM5B92QR	journalArticle	2022	Liu, Xiang; Yin, Lingdan; Xue, Mei; Chen, Jianfei; Li, Liang; Fu, Fang; Feng, Li; Liu, Pinghuang	Coronavirus Porcine Deltacoronavirus Upregulates MHC Class Expression through RIG-1/IRF1-Mediated NLRC5 Induction	Journal of Virology		0022-538X	10.1128/jvi.00158-22		Major histocompatibility complex class I (MHC-I) and MHC-11 molecules, mainly being responsible for the processing and presentation of intracellular or extracellular antigen, respectively, are critical for antiviral immunity. Here, we reported that porcine deltacoronavirus (PDCoV) with the zoonotic potential and potential spillover from pigs to humans, upregulated the expressions of porcine MHC-1…	2022/4/13	2022/9/20 11:15	2022/9/20 11:15				7	96		J. Virol.								English							Place: Washington Publisher: Amer Soc Microbiology WOS:000783123600045				rna; coronavirus; domain; family-member nlrc5; genes; i antigen presentation; interferon; irf1; MHC class I; nlrc5; PDCoV; rig-i; virus-infection
4XI6Y3BS	journalArticle	2022	Kumar, Nitya; Quadri, Suha; AlAwadhi, Abdulla Ismaeel; AlQahtani, Manaf	COVID-19 Recovery Patterns Across Alpha (B.1.1.7) and Delta (B.1.617.2) Variants of SARS-CoV-2	Frontiers in Immunology		1664-3224	10.3389/fimmu.2022.812606		BackgroundB.1.1.7 (alpha) and B.1.617.2 (delta) variants of concern for SARS-CoV-2 have been reported to have differential infectivity and pathogenicity. Difference in recovery patterns across these variants and the interaction with vaccination status has not been reported in population-based studies. ObjectiveThe objective of this research was to study the length of stay and temporal trends in R…	2022/2/14	2022/9/20 11:15	2022/9/20 11:15		812606			13		Front. Immunol.								English							Place: Lausanne Publisher: Frontiers Media Sa WOS:000761659300001				SARS-CoV-2; vaccination; impact; COVID-19 vaccine; 1; 2; 617; 7; alpha variant; b1; delta variant; hospital stay length; lessons; recovery pattern
HIGJN6MJ	journalArticle		Alberto Castaneda-Garcia, J.; Sabiote-Ortiz, Carmen M.; Vena-Oya, Julio; Mark Epstein, David	Meeting public health objectives and supporting the resumption of tourist activity through COVID-19: a triangular perspective	Current Issues in Tourism		1368-3500	10.1080/13683500.2022.2062306		Non-pharmaceutical interventions (NPIs) implemented during the COVID-19 pandemic (and previous health crises) have included measures to restrict interaction between people and minimize non-essential mobility. Therefore, tourism travel is one of the main areas affected by the restrictions. Even when the majority of the population is vaccinated, some risk of infection will remain, and governments a…		2022/9/20 11:15	2022/9/20 11:15							Curr. Issues Tour.								English							Place: Abingdon Publisher: Routledge Journals, Taylor & Francis Ltd WOS:000783400100001				covid-19; intentions; non-pharmaceutical interventions; perceptions; protection motivation theory; Tourism; travel; triangulation approach
CNLULP2I	journalArticle	2022	Morar, Cezar; Tiba, Alexandru; Jovanovic, Tamara; Valjarevic, Aleksandar; Ripp, Matthias; Vujicic, Miroslav D.; Stankov, Ugljesa; Basarin, Biljana; Ratkovic, Rade; Popovic, Maria; Nagy, Gyula; Boros, Lajos; Lukic, Tin; Boros, Lajos; Lukic, Tin	Supporting Tourism by Assessing the Predictors of COVID-19 Vaccination for Travel Reasons	International Journal of Environmental Research and Public Health			10.3390/ijerph19020918		The persistence of the SARS-CoV-2 virus imposed vaccination passports for traveling in most countries. We investigated psychological factors that predict the intention to vaccinate for travel. In a cross-sectional study, we examined how demographic variables, vaccination status, perceived risk of infection and severity of disease contracted at travel destination, safety and effectiveness of vacci…	Jan-22	2022/9/20 11:15	2022/9/20 11:15		918		2	19		Int. J. Environ. Res. Public Health								English							Place: Basel Publisher: Mdpi WOS:000747057700001				covid-19; SARS-CoV-2; travel; attitudes; behavior; beliefs; cognition; conspiracy beliefs; intention; intention to vaccinate; knowledge; motivation; oradea; perceived risk; risk perception; safety of vaccines; threat; tourism
AXURN54P	journalArticle	2022	Schuller, Max; Pfeifer, Verena; Kirsch, Alexander H.; Kloetzer, Konstantin A.; Mooslechner, Agnes A.; Rosenkranz, Alexander R.; Stiegler, Philipp; Schemmer, Peter; Sourij, Harald; Eller, Philipp; Prietl, Barbara; Eller, Kathrin	B Cell Composition Is Altered After Kidney Transplantation and Transitional B Cells Correlate With SARS-CoV-2 Vaccination Response	Frontiers in Medicine			10.3389/fmed.2022.818882		BackgroundThe COVID-19 pandemic has major implications on kidney transplant recipients (KTRs) since they show increased mortality due to impaired immune responses to SARS-CoV-2 infection and a reduced efficacy of SARS-CoV-2 vaccination. Surprisingly, dialysis patients have shown superior seroconversion rates after vaccination compared to KTRs. Therefore, we investigated peripheral blood B cell (B…	2022/2/2	2022/9/20 11:15	2022/9/20 11:15		818882			9		Front. Med.								English							Place: Lausanne Publisher: Frontiers Media Sa WOS:000759862200001				covid-19; infection; mortality; B cells; ckd g5; immunosuppressive drugs; kidney transplantation; lymphocytes; memory; recipients; rejection; SARS-CoV-2 vaccination; survival; tolerance
PWNFKUVG	journalArticle	2022	Barron, Karyl S.; Aksentijevich, Ivona; Deuitch, Natalie T.; Stone, Deborah L.; Hoffmann, Patrycja; Videgar-Laird, Ryan; Soldatos, Ariane; Bergerson, Jenna; Toro, Camilo; Cudrici, Cornelia; Nehrebecky, Michele; Romeo, Tina; Jones, Anne; Boehm, Manfred; Kanakry, Jennifer A.; Dimitrova, Dimana; Calvo, Katherine R.; Alao, Hawwa; Kapuria, Devika; Ben-Yakov, Gil; Pichard, Dominique C.; Hathaway, Londa…	The Spectrum of the Deficiency of Adenosine Deaminase 2: An Observational Analysis of a 60 Patient Cohort	Frontiers in Immunology		1664-3224	10.3389/fimmu.2021.811473		The deficiency of adenosine deaminase 2 (DADA2) is an autosomal recessively inherited disease that has undergone extensive phenotypic expansion since being first described in patients with fevers, recurrent strokes, livedo racemosa, and polyarteritis nodosa in 2014. It is now recognized that patients may develop multisystem disease that spans multiple medical subspecialties. Here, we describe the…	2022/1/10	2022/9/20 11:15	2022/9/20 11:15		811473			12		Front. Immunol.								English							Place: Lausanne Publisher: Frontiers Media Sa WOS:000747958600001				ada2; anti-TNF therapy; antibody; bone marrow failure; deficiency of adenosine deaminase 2 (DADA2); disease; genotype; hematopoietic cell transplantation (HCT); immune dysregulation; inflammation; lacunar strokes; phenotype; type-2; vasculopathy
89QAPJ3D	journalArticle	2022	Chan, Dominic K.; Alegria, Brittany D.; Chadaga, Smitha R.; Goren, Lisa J.; Mikasa, Traci J.; Pearson, Anna M.; Podolsky, Seth R.; Won, Regina S.; LeTourneau, Jennifer L.	Rapid Deployment of Multiple Tactics to Address Severe Acute Respiratory Syndrome Coronavirus 2 Vaccine Uptake in Healthcare Employees With a Focus on Those Who Identify as Black, Indigenous, and People of Color	Open Forum Infectious Diseases		2328-8957	10.1093/ofid/ofac012		This article demonstrates a multitactic approach to improving SARS-CoV-2 vaccine confidence among healthcare system employees with a focus on employees who identify as Black, Indigenous, and People of Color. Background In the third quarter of 2021, government entities enacted vaccine requirements across multiple employment sectors, including healthcare. Experience from previous vaccination campai…	2022/3/1	2022/9/20 11:15	2022/9/20 11:15		ofac012		3	9		Open Forum Infect. Dis.								English							Place: Cary Publisher: Oxford Univ Press Inc WOS:000758366100005				covid-19; SARS-CoV-2; health personnel; hesitancy; hospitals; influenza vaccination; race; strategies; vaccines; workers
4MDEFH3Y	journalArticle	2022	Papadokostaki, Eleni; Tentolouris, Anastasios; Anastasiou, Ioanna A.; Psichogiou, Mina; Iliaki, Evangelia; Eleftheriadou, Ioanna; Hatzakis, Angelos; Tentolouris, Nikolaos	Immunogenicity of SARS-CoV-2 BNT162b2 Vaccine in People with Diabetes: A Prospective Observational Study	Vaccines			10.3390/vaccines10030382		The mRNA-based BNT162b2 vaccine has demonstrated high efficacy against severe SARS-CoV-2. However, data regarding immune response in people with diabetes mellitus (DM) after vaccination with the BNT162b2 vaccine are limited. In this prospective observational study, we examined humoral immune response in participants with and without DM after vaccination with the BNT162b2 mRNA vaccine. A total of …	Mar-22	2022/9/20 11:15	2022/9/20 11:15		382		3	10		Vaccines								English							Place: Basel Publisher: Mdpi WOS:000776350000001				covid-19; SARS-CoV-2; vaccine; antibodies; humoral immune response
DXCB6RXB	journalArticle	2022	Wolz, Olaf-Oliver; Kays, Sarah-Katharina; Junker, Helga; Koch, Sven D.; Mann, Philipp; Quintini, Gianluca; Von Eisenhart-Rothe, Philipp; Oostvogels, Lidia	A Third Dose of the COVID-19 Vaccine, CVnCoV, Increased the Neutralizing Activity against the SARS-CoV-2 Wild-Type and Delta Variant	Vaccines			10.3390/vaccines10040508		A third dose of CVnCoV, a former candidate mRNA vaccine against SARS-CoV-2, was previously shown to boost neutralizing antibody responses against SARS-CoV-2 wild-type in adults aged 18-60 and >60 years in a phase 2a clinical study. In the present study, we report the neutralizing antibody responses to a wild-type and a variant of concern, Delta, after a third dose of the vaccine on day (D)57 and …	Apr-22	2022/9/20 11:15	2022/9/20 11:15		508		4	10		Vaccines								English							Place: Basel Publisher: Mdpi WOS:000785533700001				SARS-CoV-2; bnt162b2; COVID-19 vaccine; delta variant; neutralizing antibodies
QD4J6ZXG	journalArticle	2022	Eldi, Preethi; Cooper, Tamara H.; Prow, Natalie A.; Liu, Liang; Heinemann, Gary K.; Zhang, Voueleng J.; Trinidad, Abigail D.; Guzman-Genuino, Ruth Marian; Wulff, Peter; Hobbs, Leanne M.; Diener, Kerrilyn R.; Hayball, John D.	The vaccinia-based Sementis Copenhagen Vector coronavirus disease 2019 vaccine induces broad and durable cellular and humoral immune responses	Immunology and Cell Biology		0818-9641	10.1111/imcb.12539		The ongoing coronavirus disease 2019 (COVID-19) pandemic perpetuated by severe acute respiratory syndrome coronavirus 2 (SARS-CoV-2) variants has highlighted the continued need for broadly protective vaccines that elicit robust and durable protection. Here, the vaccinia virus-based, replication-defective Sementis Copenhagen Vector (SCV) was used to develop a first-generation COVID-19 vaccine enco…	Apr-22	2022/9/20 11:15	2022/9/20 11:15		250-266		4	100		Immunol. Cell Biol.								English							Place: Hoboken Publisher: Wiley WOS:000767958200001				covid-19; SARS-CoV-2; vaccine; Antibodies; cells; cellular responses; chikungunya; polyfunctional T cells; spike
RYJ7TR7V	journalArticle	2022	Gutierrez-Garcia, Rafael; De La Cerda-Angeles, Juan C.; Cabrera-Licona, Ariana; Delgado-Enciso, Ivan; Mervitch-Sigal, Nicolas; Paz-Michel, Brenda A.	Nasopharyngeal and oropharyngeal rinses with neutral electrolyzed water prevents COVID-19 in front-line health professionals: A randomized, open-label, controlled trial in a general hospital in Mexico City	Biomedical Reports		2049-9434	10.3892/br.2021.1494		The worldwide efforts that healthcare professionals are making in the COVID-19 pandemic is well known, and the high risk of illness and death that front-line staff experience on a daily basis is a reality, despite well-defined protocols for the use of personal protective equipment. In addition, it is well known that vaccination is still faraway to be achieved worldwide and that new variants are e…	Feb-22	2022/9/20 11:15	2022/9/20 11:15		11		2	16		Biomed. Rep.								English							Place: Athens Publisher: Spandidos Publ Ltd WOS:000741544000001				covid-19; SARS-CoV-2; mouthwashes; nasal rinses; neutral electrolyzed water; prophylaxis
TBVFJUDD	journalArticle	2022	Islam, Nazmul; Sheils, Natalie E.; Jarvis, Megan S.; Cohen, Kenneth	Comparative effectiveness over time of the mRNA-1273 (Moderna) vaccine and the BNT162b2 (Pfizer-BioNTech) vaccine	Nature Communications			10.1038/s41467-022-30059-3		In this retrospective cohort study, Islam et al. estimate the effectiveness of two mRNA-based COVID-19 vaccines in over 3.5 million fully vaccinated individuals and find no differences in vaccine effectiveness for protection against hospitalization, ICU admission, or death/hospice transfer. Real-world analysis of the incidence of SARS-CoV-2 infection post vaccination is important in determining t…	2022/5/2	2022/9/20 11:15	2022/9/20 11:15		2377		1	13		Nat. Commun.								English							Place: Berlin Publisher: Nature Portfolio WOS:000789924700025				regression; treat
VC83Z4Q2	journalArticle	2022	Flores, Alexandra; Cole, Jennifer C.; Dickert, Stephan; Eom, Kimin; Jiga-Boy, Gabriela M.; Kogut, Tehila; Loria, Riley; Mayorga, Marcus; Pedersen, Eric J.; Pereira, Beatriz; Rubaltelli, Enrico; Sherman, David K.; Slovic, Paul; Vastfjall, Daniel; Van Boven, Leaf	Politicians polarize and experts depolarize public support for COVID-19 management policies across countries	Proceedings of the National Academy of Sciences of the United States of America		0027-8424	10.1073/pnas.2117543119		Political polarization impeded public support for policies to reduce the spread of COVID-19, much as polarization hinders responses to other contemporary challenges. Unlike previous theory and research that focused on the United States, the present research examined the effects of political elite cues and affective polarization on support for policies to manage the COVID-19 pandemic in seven coun…	2022/1/18	2022/9/20 11:15	2022/9/20 11:15		e2117543119		3	119		Proc. Natl. Acad. Sci. U. S. A.								English							Place: Washington Publisher: Natl Acad Sciences WOS:000758684600012				covid-19; affective; cross-country comparisons; expertise; identity; partisanship; party; polarization; political polarization; psychological barriers
HRR4MEMG	journalArticle	2022	Fazio, Nicola Di; Delogu, Giuseppe; Bertozzi, Giuseppe; Fineschi, Vittorio; Frati, Paola	SARS-CoV2 Vaccination Adverse Events Trend in Italy: A Retrospective Interpretation of the Last Year (December 2020-September 2021)	Vaccines			10.3390/vaccines10020216		At the end of 2020, a vaccination campaign against COVID-19 was launched. In 2021, legal obligations for health workers, as well as specific regulations for all workers, were introduced. The global SARS-CoV-2 pandemic was followed by epochal changes in life, school, and work habits in Italy. Therefore, the pharmacovigilance work currently being conducted in Italy by the AIFA concerning the record…	Feb-22	2022/9/20 11:15	2022/9/20 11:15		216		2	10		Vaccines								English							Place: Basel Publisher: Mdpi WOS:000762046700001				covid-19; vaccine; adverse effect; aifa; Italy; personalized medicine; pharmacovigilance
NBBDKE4L	journalArticle		Bassi, Sukhpreet; Begum, Rubena; Onatade, Raliat; Olie, Catherine	Analysis of clinical enquiries received by five COVID-19 vaccination centres in the UK	European Journal of Hospital Pharmacy		2047-9956	10.1136/ejhpharm-2021-003172		The aim of this study was to explore the nature of clinical enquiries received by UK vaccination centres during the early stages in the roll-out of the COVID-19 vaccination programme. Four centres were situated in acute hospitals and one centre was in a designated public site. Data were collected for eight consecutive weeks between January and February 2021. The hospital centres administered a to…		2022/9/20 11:15	2022/9/20 11:15							Eur. J. Hosp. Pharm.								English							Place: London Publisher: Bmj Publishing Group WOS:000776585400001				covid-19; clinical medicine; continuing; education; hospital; medical informatics; pharmacy; pharmacy service; public health; quality of health care
D7ZVXH87	journalArticle	2022	Tolia, Viral; Renin Singh, Rajkumar; Deshpande, Sameer; Dave, Anupama; Rathod, Raju M.	Understanding Factors to COVID-19 Vaccine Adoption in Gujarat, India	International Journal of Environmental Research and Public Health			10.3390/ijerph19052707		The COVID-19 pandemic has posed threats to human life across the globe, including India. Vaccinating is an effective means of addressing the pandemic threat. The government of India has implemented a massive vaccination drive to save its citizens from the deadly virus. However, the effort has faced multiple challenges, including vaccine hesitancy. This research understands respondents' perspectiv…	Mar-22	2022/9/20 11:15	2022/9/20 11:15		2707		5	19		Int. J. Environ. Res. Public Health								English							Place: Basel Publisher: Mdpi WOS:000768815500001				covid-19; India; hesitancy; acceptance; social marketing; vaccine uptake; willingness
WA44BYRL	journalArticle		Gazit, Sivan; Shlezinger, Roei; Perez, Galit; Lotan, Roni; Peretz, Asaf; Ben-Tov, Amir; Herzel, Esma; Alapi, Hillel; Cohen, Dani; Muhsen, Khitam; Chodick, Gabriel; Patalon, Tal	Severe Acute Respiratory Syndrome Coronavirus 2 (SARS-CoV-2) Naturally Acquired Immunity versus Vaccine-induced Immunity, Reinfections versus Breakthrough Infections: A Retrospective Cohort Study	Clinical Infectious Diseases		1058-4838	10.1093/cid/ciac262		Background Waning of protection against infection with severe acute respiratory syndrome coronavirus 2 (SARS-CoV-2) conferred by 2 doses of the BNT162b2 vaccine begins shortly after inoculation and becomes substantial within 4 months. With that, the impact of prior infection on incident SARS-CoV-2 reinfection is unclear. Therefore, we examined the long-term protection of naturally acquired immuni…		2022/9/20 11:15	2022/9/20 11:15							Clin. Infect. Dis.								English							Place: Cary Publisher: Oxford Univ Press Inc WOS:000796624600001				covid-19; SARS-CoV-2; vaccination; vaccine; induced immunity; naturally acquired immunity
WAEJIATL	journalArticle	2022	Massonnaud, Clement R.; Roux, Jonathan; Colizza, Vittoria; Crepey, Pascal	Evaluating COVID-19 Booster Vaccination Strategies in a Partially Vaccinated Population: A Modeling Study	Vaccines			10.3390/vaccines10030479		Background: Several countries are implementing COVID-19 booster vaccination campaigns. The objective of this study was to model the impact of different primary and booster vaccination strategies. Methods: We used a compartmental model fitted to hospital admission data in France to analyze the impact of primary and booster vaccination strategies on morbidity and mortality, assuming waning of immun…	Mar-22	2022/9/20 11:15	2022/9/20 11:15		479		3	10		Vaccines								English							Place: Basel Publisher: Mdpi WOS:000774420200001				covid-19; risk; SARS-CoV-2; vaccination; vaccines; booster; epidemiology; modeling; sars-cov-2
DIR5U4R2	journalArticle	2022	Skrzat-Klapaczynska, Agata; Bienkowski, Carlo; Kowalska, Justyna; Paciorek, Marcin; Pula, Joanna; Krogulec, Dominika; Stengiel, Jaroslaw; Pawelczyk, Agnieszka; Perlejewski, Karol; Osuch, Sylwia; Radkowski, Marek; Horban, Andrzej	The Beneficial Effect of the COVID-19 Vaccine Booster Dose among Healthcare Workers in an Infectious Diseases Center	Vaccines			10.3390/vaccines10040552		Introduction: Healthcare workers in Poland received a booster dose of the BNT162b2 mRNA vaccine (Pfizer-BioNTech, Manufacturer: Pfizer, Inc., and BioNTech; Moguncja, Germany) at the beginning of October 2021. Here, we report on the preliminary results of an ongoing clinical study into the antibody response to SARS-CoV-2 of healthcare workers previously exposed to the virus, with or without eviden…	Apr-22	2022/9/20 11:15	2022/9/20 11:15		552		4	10		Vaccines								English							Place: Basel Publisher: Mdpi WOS:000785261900001				covid-19; vaccination; antibody response; healthcare workers
ZR8EEQPK	journalArticle	2022	Bachelet, Vivienne C.; Silva-Ayarza, Ignacio; Lizana, Francisca J.; Gomolan, Patricio; Silva-Villalobos, Diego; Navarrete, Maria S.	SARS-CoV-2 humoral immune response in patients with cardiovascular risk factors: the COmmunity Cohort Study protocol	Bmj Open		2044-6055	10.1136/bmjopen-2022-061345		Introduction The COmmunity Cohort Study aims to determine, after natural exposure to SARS-CoV-2 or anti-SARS-CoV-2 vaccines deployed in Chile to prevent COVID-19 in the context of the current pandemic, the strength and duration of detectable neutralising antibodies in adult ambulatory primary care patients with cardiovascular risk factors. Methods and analysis We will set up a community-based lon…	May-22	2022/9/20 11:15	2022/9/20 11:15		e061345		5	12		BMJ Open								English							Place: London Publisher: Bmj Publishing Group WOS:000798799500013				covid-19; bnt162b2; disease; antibody-responses; durability; kinetics; vocs
YFNPHFQU	journalArticle	2022	Johnson, Caroline; Dukes, Kimberly; Sinnwell, Emily; Culp, Kennith; Zinnel, Daniel; Corwin, Claudia	Innovative Cohort Process to Minimize COVID-19 Infection for Migrant Farmworkers During Travel to Iowa	Workplace Health & Safety		2165-0799	10.1177/21650799211045308		Background: Migrant and seasonal farmworkers (MSFW) experience disproportionate infection, severe disease and death from COVID-19. This report describes an innovative process to address the safety of MSFW that utilized cohorting that eventually allowed for safe release to work in the fields on a large family farm in Iowa. Methods: Upon worker departure from Mexico, the employer arranged for bus s…	Jan-22	2022/9/20 11:15	2022/9/20 11:15		17-23		1	70		Workplace Health Saf.								English							Place: Thousand Oaks Publisher: Sage Publications Inc WOS:000745066400003				covid-19; safety; vaccines; communicable; employee health; health; immunizations; infectious diseases; migrant and seasonal farmworkers
9NP5G3LD	journalArticle	2022	Zou, Zhuoru; Fairley, Christopher K.; Shen, Mingwang; Scott, Nick; Xu, Xianglong; Li, Zengbin; Li, Rui; Zhuang, Guihua; Zhang, Lei	Critical timing and extent of public health interventions to control outbreaks dominated by SARS-CoV-2 variants in Australia: a mathematical modelling study	International Journal of Infectious Diseases		1201-9712	10.1016/j.ijid.2021.11.024		Objectives: The exact characteristics of a coronavirus disease 2019 (COVID-19) outbreak that trigger public health interventions are poorly defined. The aim of this study was to assess the critical timing and extent of public health interventions to contain COVID-19 outbreaks in Australia. Methods: A practical model was developed using existing epidemic data in Australia. The effective combinatio…	Feb-22	2022/9/20 11:15	2022/9/20 11:15		154-165			115		Int. J. Infect. Dis.								English							Place: Oxford Publisher: Elsevier Sci Ltd WOS:000787774100024				covid-19; SARS-CoV-2; vaccine; Vaccination; Modelling; Public health interventions; transmission; Variants
B4ZG2KMB	journalArticle	2022	Veneti, Lamprini; Salamanca, Beatriz Valcarcel; Seppala, Elina; Starrfelt, Jostein; Storm, Margrethe Larsdatter; Bragstad, Karoline; Hungnes, Olav; Boas, Hakon; Kvale, Reidar; Vold, Line; Nygard, Karin; Buanes, Eirik Alnes; Whittaker, Robert	No difference in risk of hospitalization between reported cases of the SARS-CoV-2 Delta variant and Alpha variant in Norway	International Journal of Infectious Diseases		1201-9712	10.1016/j.ijid.2021.12.321		Objectives: To estimate the risk of hospitalization among reported cases of the Delta variant of severe acute respiratory syndrome coronavirus-2 (SARS-CoV-2) compared with the Alpha variant in Norway, and the risk of hospitalization by vaccination status. Methods: A cohort study was conducted on laboratory-confirmed cases of SARS-CoV-2 in Norway, diagnosed between 3 May and 15 August 2021. Adjust…	Feb-22	2022/9/20 11:15	2022/9/20 11:15		178-184			115		Int. J. Infect. Dis.								English							Place: Oxford Publisher: Elsevier Sci Ltd WOS:000787774100028				SARS-CoV-2; Alpha; Delta; Hospitalization; Norway; Variants of concern
G7VIVA9Q	journalArticle	2022	Wienkes, Haley; Vilen, Kelley; Lorentz, Alexandra; Gerlach, Daniel; Wang, Xiong; Saupe, Amy; Danila, Richard; Lynfield, Ruth; Smith, Kirk; Medus, Carlota	Transmission of and Infection With COVID-19 Among Vaccinated and Unvaccinated Attendees of an Indoor Wedding Reception in Minnesota	Jama Network Open		2574-3805	10.1001/jamanetworkopen.2022.0536		IMPORTANCE Characterizing rates of SARS-CoV-2 infection among vaccinated and unvaccinated persons with the same exposure is critical to understanding the association of vaccination with the risk of infection with the Delta variant. Additionally, evidence of Delta variant transmission by children to vaccinated adults has important public health implications. OBJECTIVE To characterize transmission …	2022/2/25	2022/9/20 11:15	2022/9/20 11:15		e220536		2	5		JAMA Netw. Open								English							Place: Chicago Publisher: Amer Medical Assoc WOS:000760970700009
RI2ERLPJ	journalArticle	2022	Iscan, Gokce; Cetin, Bulent; Kilic, Faruk; Kalayci, Hakan; Kalayci, Aysegul; Iscan, Serhan Can	Investigation of anxiety sensitivity levels of cancer patients in terms of COVID-19 vaccine: a cross-sectional study	Supportive Care in Cancer		0941-4355	10.1007/s00520-021-06750-4		Introduction Our study's purpose was to investigate the viewpoints of cancer patients who had not yet been vaccinated. Cancer patients usually cannot get every vaccine because their immunity is low. For this reason, we aimed to detect their anxiety and curiosity for new vaccines for a new disease. Methods The goal of this descriptive cross-sectional study was to investigate cancer patients' perce…	May-22	2022/9/20 11:15	2022/9/20 11:15		4139-4147		5	30		Support. Care Cancer								English							Place: New York Publisher: Springer WOS:000745790800004				covid-19; Vaccination; influenza vaccination; Anxiety; Anxiety sensitivity; Cancer
LXZZUDDF	journalArticle	2022	Dhakal, Mona; Dhakal, O. M. Prakash; Bhandari, Dhurba	Antibody Response following Exposure to SARS-CoV-2: Is It a Reliable Marker of Immunity?	Journal of Clinical and Diagnostic Research		2249-782X	10.7860/JCDR/2022/52654.16284		Introduction: Infection and vaccination with the viral vector vaccine Covishield are both expected to produce immunity in the body against Severe Acute Respiratory Syndrome Coronavirus 2 (SARS-CoV-2). Production of neutralising antibodies as a result of the humoral immune response plays a key role in defending against this deadly infection. A lack of virus-specific antibodies in the serum does no…	Apr-22	2022/9/20 11:15	2022/9/20 11:15		OC36-OC39		4	16		J. Clin. Diagn. Res.								English							Place: Delhi Publisher: Premchand Shantidevi Research Foundation WOS:000792191500006				Vaccine; Agglutination; B-cell; T-cell
W2GZP88C	journalArticle		Amir, Gabriel; Rotstein, Amichai; Razon, Yaron; Beyersdorf, Gil Beer; Barak-Corren, Yuval; Godfrey, Max E.; Lakovsky, Yaniv; Yaeger-Yarom, Gili; Yarden-Bilavsky, Havazelet; Birk, Einat	CMR Imaging 6 Months After Myocarditis Associated with the BNT162b2 mRNA COVID-19 Vaccine	Pediatric Cardiology		0172-0643	10.1007/s00246-022-02878-0		Temporal association between BNT162b2 mRNA COVID-19 vaccine and myocarditis (PCVM) has been reported. We herein present early and 6-month clinical follow-up and cardiac magnetic resonance imaging (CMR) of patients with PVCM. A retrospective collection of data from 15 patients with PCVM and abnormal CMR was performed. Clinical manifestation, laboratory data, hospitalizations, treatment protocols, …		2022/9/20 11:15	2022/9/20 11:15							Pediatr. Cardiol.								English							Place: New York Publisher: Springer WOS:000772446800001				covid-19; impact; Vaccine; Cardiac magnetic resonance imaging (CMR); children; deaths; diagnosis; Follow-up; infections; magnetic-resonance; Myocarditis; scientific statement
UYGPA3RB	journalArticle	2022	Chaudhuri, Somnath; Gimenez-Adsuar, Gerard; Saez, Marc; Barcelo, Maria A.	PandemonCAT: Monitoring the COVID-19 Pandemic in Catalonia, Spain	International Journal of Environmental Research and Public Health			10.3390/ijerph19084783		Background: The principal objective of this paper is to introduce an online interactive application that helps in real-time monitoring of the COVID-19 pandemic in Catalonia, Spain (PandemonCAT). Methods: This application is designed as a collection of user-friendly dashboards using open-source R software supported by the Shiny package. Results: PandemonCAT reports accumulated weekly updates of CO…	Apr-22	2022/9/20 11:15	2022/9/20 11:15		4783		8	19		Int. J. Environ. Res. Public Health								English							Place: Basel Publisher: Mdpi WOS:000785342800001				covid-19; mobility; shiny; spatiotemporal
ELVF86JF	journalArticle	2022	Esmaeilzadeh, Pouyan	Public concerns and burdens associated with face mask-wearing: Lessons learned from the COVID-19 pandemic	Progress in Disaster Science		2590-0617	10.1016/j.pdisas.2022.100215		This study attempts to identify and categorize the key concerns of wearing masks. An online survey was used to collect data from 2746 people in the United States. Results show that the mask-wearing concerns can be classified into three categories; discomfort barriers (physical discomfort and communication discomfort), external factors (overstated news about coronavirus threat, political beliefs, …	Jan-22	2022/9/20 11:15	2022/9/20 11:15		100215			13		Prog. Disaster Sci.								English							Place: Amsterdam Publisher: Elsevier WOS:000766212000005				impact; vaccine; behavior; Concerns; context; Continuance intention; COVID-19 pandemic; curtail; epidemic; Face masks; illustration; Misinformation; will
ZDRCJX5F	journalArticle		Upadhyay, Ranjit Kumar; Chatterjee, Sourin; Roy, Parimita; Bhardwaj, Dyuti	Combating COVID-19 crisis and predicting the second wave in Europe: an Age-structured modeling	Journal of Applied Mathematics and Computing		1598-5865	10.1007/s12190-022-01723-0		We employ an age-structured susceptible-infected-quarantined-recovered model to simulate the progression of COVID-19 in France, Spain, and Germany. In the absence of a vaccine or conventional treatment, non-pharmaceutical interventions become more valuable, so our model takes into account the efficacy of official social distancing and lockdown measures. Using data from February to July 2020, we m…		2022/9/20 11:15	2022/9/20 11:15							J. Appl. Math. Comput.								English							Place: Heidelberg Publisher: Springer Heidelberg WOS:000771354100002				Age structured model; Contact matrix; Optimal control; Transmission probability
PPYSITG7	journalArticle	2022	Karimi, Mehran; Zarei, Tahereh; Haghpanah, Sezaneh; Azarkeiva, Azita; Naderi, Maryam; Matin, Sara; Bazrafshan, Asghar; Zahedi, Zohreh; Shirkavand, Afshan; Pishdad, Parisa; De Sanctis, Vincenzo	Efficacy and Safety of Sinopharm Vaccine for SARS-CoV-2 and breakthrough infections in Iranian Patients with Hemoglobinopathies: A Preliminary Report	Mediterranean Journal of Hematology and Infectious Diseases			10.4084/MJHID.2022.026		Background: The ongoing COVID-19 pandemic, caused by severe acute respiratory syndrome coronavirus 2 (SARS-CoV-2), has led to high morbidity and mortality worldwide. Vaccination against SARS-CoV-2 is a leading strategy to change the course of the COVID-19 pandemic. Aims of the study: Our aim was to investigate the efficacy and side effects of the Sinopharm vaccine in patients with hemoglobinopath…	2022/3/1	2022/9/20 11:15	2022/9/20 11:15		e2022026			14		Med. J. Hematol. Infect. Dis.								English							Place: Fidenza Publisher: Mattioli 1885 WOS:000765024700011				Adverse events; Breakthrough SARS-CoV-2 infection; covid-19 vaccine; Efficacy; Hemoglobinopathies; Safety; Sinopharm vaccine
2EISLY6J	journalArticle	2022	Lyski, Zoe L.; Kim, Myung Sun; Xthona Lee, David; Sampson, David; Raue, Hans-Peter; Raghunathan, Vikram; Ryan, Debbie; Brunton, Amanda E.; Slifka, Mark K.; Messer, William B.; Spurgeon, Stephen E.	Immunogenicity of Pfizer mRNA COVID-19 Vaccination Followed by J&J Adenovirus COVID-19 Vaccination in Two Patients with Chronic Lymphocytic Leukemia	Case Reports in Hematology		2090-6560	10.1155/2022/6831640		Individuals with chronic lymphocytic leukemia (CLL) have significant immune disfunction, often further disrupted by treatment. While currently available COVID-19 vaccinations are highly effective in immunocompetent individuals, they are often poorly immunogenic in CLL patients. It is important to understand the role a heterologous boost would have in patients who did not respond to the initial tw…	2022/2/4	2022/9/20 11:15	2022/9/20 11:15		6831640			2022		Case Rep. Hematol.								English							Place: London Publisher: Hindawi Ltd WOS:000772899700001
7KJE6MCQ	journalArticle		Han, Mi Seon; Um, Jihye; Lee, Eun Joo; Kim, Kyung Min; Chang, Sung Hee; Lee, Hyunju; Kim, Ye Kyung; Choi, Youn Young; Cho, Eun Young; Kim, Dong Hyun; Choi, Jae Hong; Lee, Jina; Kim, Misuk; Chung, Ki-Hyun; Min, Hye Sook; Choe, Young June; Lim, Dong-Gyun; Park, Jun-Sun; Choi, Eun Hwa	Antibody Responses to SARS-CoV-2 in Children With COVID-19	Journal of the Pediatric Infectious Diseases Society		2048-7193	10.1093/jpids/piac012		SARS-CoV-2 antibodies were detected from 7 days after onset in children with asymptomatic and mild COVID-19 and peaked at 28 to <56 days from onset. The antibodies remained detectable for at least 3 months with slight decreasing titers. Background The immunologic features of children with coronavirus disease 2019 (COVID-19) caused by severe acute respiratory syndrome coronavirus 2 (SARS-CoV-2) ar…		2022/9/20 11:15	2022/9/20 11:15							J. Pediatr. Infect. Dis. Soc.								English							Place: Oxford Publisher: Oxford Univ Press WOS:000768377200001				covid-19; SARS-CoV-2; antibody response; children
5V4HSK2I	journalArticle	2022	Ramatillah, Diana Laila; Gan, Siew Hua; Pratiwy, Ika; Sulaiman, Syed Azhar Syed; Jaber, Ammar Ali Saleh; Jusnita, Nina; Lukas, Stefanus; Abu Bakar, Usman	Impact of cytokine storm on severity of COVID-19 disease in a private hospital in West Jakarta prior to vaccination	Plos One		1932-6203	10.1371/journal.pone.0262438		Background and aim Coronavirus Disease 2019 (COVID-19) has become a worldwide pandemic and is a threat to global health. Patients who experienced cytokine storms tend to have a high mortality rate. However, to date, no study has investigated the impact of cytokine storms. Materials and methods This retrospective cohort study included only COVID-19 positive patients hospitalized in a Private Hospi…	2022/1/25	2022/9/20 11:15	2022/9/20 11:15		e0262438		1	17		PLoS One								English							Place: San Francisco Publisher: Public Library Science WOS:000792720400027				pneumonia
F5F9FUYS	journalArticle	2022	Goessling, Stefan; Schweiggart, Nadja	Two years of COVID-19 and tourism: what we learned, and what we should have learned	Journal of Sustainable Tourism		0966-9582	10.1080/09669582.2022.2029872		In January 2020, infections with a novel coronavirus were confirmed in China. Two years into the pandemic, countries continue to struggle with fifth and sixth waves, new virus variants, and varying degrees of success in vaccinating national populations. Travel restrictions continue to persist, and the global tourism industry looks into a third year of uncertainty. There is a consensus that the CO…	2022/4/3	2022/9/20 11:15	2022/9/20 11:15		915-931		4	30		J. Sustain. Tour.								English							Place: Abingdon Publisher: Routledge Journals, Taylor & Francis Ltd WOS:000744850200001				covid-19; impact; climate change; crisis management; emergency; governance; management; policy; scenarios; sustainable tourism; vulnerability
6UKLKZTN	journalArticle		Luis Manfredi-Sanchez, Juan	Vaccine (public) diplomacy: legitimacy narratives in the pandemic age	Place Branding and Public Diplomacy		1751-8040	10.1057/s41254-022-00258-2		This paper examines how China, United States, the European Union, and Russia deal with the COVID crisis creating a legitimacy narrative to promote their political projects and values. The counter-pandemic measures include the use of public diplomacy tools and the novelty of the vaccine. The results show that presidential overexposure, tweets, and the language of emotion are strong arguments in bu…		2022/9/20 11:15	2022/9/20 11:15							Place Branding Public Dipl.								English							Place: Basingstoke Publisher: Palgrave Macmillan Ltd WOS:000749983700001				Vaccine; Propaganda; Public diplomacy; soft power; Strategic narratives; us grand strategy
9PT4QHPV	journalArticle	2022	Mundagowa, Paddington Tinashe; Tozivepi, Samantha Nokuthula; Chiyaka, Edward Tafumaneyi; Mukora-Mutseyekwa, Fadzai; Makurumidze, Richard	Assessment of COVID-19 vaccine hesitancy among Zimbabweans: A rapid national survey	Plos One		1932-6203	10.1371/journal.pone.0266724		BackgroundAs a way of minimising the devastating effects of the coronavirus disease 2019 (COVID-19) pandemic, scientists hastily developed a vaccine. However, the scale-up of the vaccine is likely to be hindered by the widespread social media misinformation. We therefore conducted a study to assess the COVID-19 vaccine hesitancy among Zimbabweans. MethodsWe conducted a descriptive online cross-se…	2022	2022/9/20 11:15	2022/9/20 11:15		e0266724		4	17		PLoS One								English							Place: San Francisco Publisher: Public Library Science WOS:000795468200045				acceptance
LNZLUL76	journalArticle		Ma, Libing; Yang, Jin; Zhang, Ting; Han, Xuan; Huang, Qiangru; Yang, Yuan; Feng, Luzhao; Yang, Weizhong; Wang, Chen	Willingness toward COVID-19 vaccination, coadministration with other vaccines and receive a COVID-19 vaccine booster: a cross-sectional study on the guardians of children in China	Human Vaccines & Immunotherapeutics		2164-5515	10.1080/21645515.2022.2049169		This study aimed to investigate the changes in the willingness of guardians to administer the COVID-19 vaccine to their children, allow the coadministration of other vaccines, and administer the COVID-19 vaccine booster dose. This was a follow-up study conducted 6 months after a similar previous study. The self-administered questionnaire was distributed through the "Xiao Dou Miao" app and 9424 gu…		2022/9/20 11:15	2022/9/20 11:15							Human Vaccines Immunother.								English							Place: Philadelphia Publisher: Taylor & Francis Inc WOS:000782364800001				Children; coadministration; COVID-19 vaccine booster; willingness toward vaccination
L46YJU4K	journalArticle	2022	Xiang, Jingyu; Lu, Mijia; Shi, Min; Cheng, Xiaogang; Kwakwa, Kristin A.; Davis, Jennifer L.; Su, Xinming; Bakewell, Suzanne J.; Zhang, Yuexiu; Fontana, Francesca; Xu, Yalin; Veis, Deborah J.; DiPersio, John F.; Ratner, Lee; Sanderson, Ralph D.; Noseda, Alessandro; Mollah, Shamim; Li, Jianrong; Weilbaecher, Katherine N.	Heparanase Blockade as a Novel Dual-Targeting Therapy for COVID-19	Journal of Virology		0022-538X	10.1128/jvi.00057-22		The coronavirus disease 2019 (COVID-19) pandemic, caused by severe acute respiratory syndrome coronavirus 2 (SARS-CoV-2), has caused over 5 million deaths worldwide. Pneumonia and systemic inflammation contribute to its high mortality. Many viruses use heparan sulfate proteoglycans as coreceptors for viral entry, and heparanase (HPSE) is a known regulator of both viral entry and inflammatory cyto…	2022/4/13	2022/9/20 11:15	2022/9/20 11:15		e00057-22		7	96		J. Virol.								English							Place: Washington Publisher: Amer Soc Microbiology WOS:000783123600028				covid-19; SARS-CoV-2; activation; entry; heparanase; heparin; inflammatory cytokine release; inhibition; macrophage; macrophages; mechanisms; receptor; sulfate; virus
V8QLF2DF	journalArticle	2022	Nalunkuma, Racheal; Abila, Derrick Bary; Ssewante, Nelson; Kiyimba, Blaise; Kigozi, Edwin; Kisuza, Ruth Ketty; Kasekende, Fulugensio; Nkalubo, Jonathan; Kalungi, Samuel; Muttamba, Winters; Kiguli, Sarah	Double Face Mask Use for COVID-19 Infection Prevention and Control Among Medical Students at Makerere University: A Cross-Section Survey	Risk Management and Healthcare Policy			10.2147/RMHP.S347972		Introduction: The second wave of COVID-19 greatly affected the health care and education systems in Uganda, due to the infection itself and the lockdowns instituted. Double masking has been suggested as a safe alternative to double-layered masks, where the quality of the latter may not be guaranteed. This study aimed to determine patterns of double mask use among undergraduate medical students at…	2022	2022/9/20 11:15	2022/9/20 11:15		111-120			15		RISK MANAG. HEALTHC. POLICY								English							Place: Albany Publisher: Dove Medical Press Ltd WOS:000749530800002				covid-19; double masking; fit; infection prevention and control; second wave
UIINVXHF	journalArticle	2022	Su, Rongfei; Hu, Yuqi; Liao, Zhenpeng; Tan, Kai Sen; Hong, Haiyu; Fan, Yunping	Zero Secondary Transmission from Three Traveling COVID-19 Cases in China: A Case for Social Responsibility from the General Public in Stemming the Chain of Transmission	Risk Management and Healthcare Policy			10.2147/RMHP.S328950		The number of confirmed COVID-19 cases continues to rise around the world, which is a huge threat to the safety of people and the social economy. Despite the introduction of vaccines, effectively preventing and controlling the epidemic, especially in protecting vulnerable populations, remains a big challenge for countries worldwide. By summarizing the trajectory of several officially reported COV…	2022	2022/9/20 11:15	2022/9/20 11:15		107-109			15		RISK MANAG. HEALTHC. POLICY								English							Place: Albany Publisher: Dove Medical Press Ltd WOS:000749530800001				covid-19; disease prevention; masks wearing; public health measures; social distancing; social responsibility
G7VLWZ4K	journalArticle	2022	Tylicki, Leszek; Debska-Slizien, Alicja; Muchlado, Marta; Slizien, Zuzanna; Golebiewska, Justyna; Dabrowska, Malgorzata; Biedunkiewicz, Bogdan	Boosting Humoral Immunity from mRNA COVID-19 Vaccines in Kidney Transplant Recipients	Vaccines			10.3390/vaccines10010056		Introduction: The immune response to the primary (two-dose) series of mRNA COVID-19 vaccines in kidney transplant recipients (KTRs) is very weak. We conducted a longitudinal observational study to compare the humoral response to a third, additional primary dose of mRNA vaccines between infection-naive (IN-KTRs) and previously infected KTRs (PI-KTRs). Methods: We measured the levels of anti-spike …	Jan-22	2022/9/20 11:15	2022/9/20 11:15		56		1	10		Vaccines								English							Place: Basel Publisher: Mdpi WOS:000757117400001				covid-19; seroconversion; sars-cov-2; kidney transplant recipients; mRNA vaccines
F7V6Z5MD	journalArticle		Evgeniou, Theodoros; Fekom, Mathilde; Ovchinnikov, Anton; Porcher, Raphael; Pouchol, Camille; Vayatis, Nicolas	Pandemic lockdown, isolation, and exit policies based on machine learning predictions	Production and Operations Management		1059-1478	10.1111/poms.13726		The widespread lockdowns imposed in many countries at the beginning of the COVID-19 pandemic elevated the importance of research on pandemic management when medical solutions such as vaccines are unavailable. We present a framework that combines a standard epidemiological SEIR (susceptible-exposed-infected-removed) model with an equally standard machine learning classification model for clinical …		2022/9/20 11:15	2022/9/20 11:15							Prod. Oper. Manag.								English							Place: Hoboken Publisher: Wiley WOS:000793690100001				covid-19; epidemic; epidemic models; machine learning; personalized risk management; sir
9TBF7AAR	journalArticle	2022	Scherlinger, Marc; Pijnenburg, Luc; Chatelus, Emmanuel; Arnaud, Laurent; Gottenberg, Jacques-Eric; Sibilia, Jean; Felten, Renaud	Effect of SARS-CoV-2 Vaccination on Symptoms from Post-Acute Sequelae of COVID-19: Results from the Nationwide VAXILONG Study	Vaccines			10.3390/vaccines10010046		Introduction: Few data are available concerning the effect of SARS-CoV-2 vaccination on the persistent symptoms associated with COVID-19, also called long-COVID or post-acute sequelae of COVID-19 (PASC). Patients and methods: We conducted a nationwide online study among adult patients with PASC as defined by symptoms persisting over 4 weeks following a confirmed or probable COVID-19, without any …	Jan-22	2022/9/20 11:15	2022/9/20 11:15		46		1	10		Vaccines								English							Place: Basel Publisher: Mdpi WOS:000748164800001				SARS-CoV-2; vaccine; long-COVID; post-acute sequelae of COVID-19
T52RHKG7	journalArticle		Wang, Chia-Wen; de Jong, Erik Pieter; Faure, Josemyrne Ashley; Ellington, Jaylynn Leigh; Chen, Chi-Hsin Sally; Chan, Chang-Chuan	A matter of trust: a qualitative comparison of the determinants of COVID-19 vaccine hesitancy in Taiwan, the United States, the Netherlands, and Haiti	Human Vaccines & Immunotherapeutics		2164-5515	10.1080/21645515.2022.2050121		COVID-19 vaccination is an effective intervention preventing individuals from contracting SARS-CoV-2 or transmitting the virus to others. However, in many countries, vaccine hesitancy has impeded the progress of mass vaccination to reach herd immunity. This study aimed to understand the similarities and differences in the determinants of COVID-19 vaccine hesitancy in Taiwan, the United States, th…		2022/9/20 11:15	2022/9/20 11:15							Human Vaccines Immunother.								English							Place: Philadelphia Publisher: Taylor & Francis Inc WOS:000774687200001				covid-19; qualitative study; trust issues; vaccine literacy; vaccine hesitancy
WJ2PVNQ8	journalArticle	2022	Yeung, Priscilla S.-W.; Wang, Hannah; Sibai, Mamdouh; Solis, Daniel; Yamamoto, Fumiko; Iwai, Naomi; Jiang, Becky; Hammond, Nathan; Truong, Bernadette; Bihon, Selamawit; Santos, Suzette; Mar, Marilyn; Mai, Claire; Mfuh, Kenji O.; Miller, Jacob A.; Huang, ChunHong; Sahoo, Malaya K.; Zehnder, James L.; Pinsky, Benjamin A.	Evaluation of a Rapid and Accessible Reverse Transcription-Quantitative PCR Approach for SARS-CoV-2 Variant of Concern Identification	Journal of Clinical Microbiology		0095-1137	10.1128/jcm.00178-22		Y The ability to distinguish between severe acute respiratory syndrome coronavirus 2 (SARS-CoV-2) variants of concern (VOCs) is of ongoing interest due to differences in transmissibility, responses to vaccination, clinical prognosis, and therapy. Although detailed genetic characterization requires whole-genome sequencing (WGS), targeted nucleic acid amplification tests can serve a complementary r…	2022/5/18	2022/9/20 11:15	2022/9/20 11:15				5	60		J. Clin. Microbiol.								English							Place: Washington Publisher: Amer Soc Microbiology WOS:000788017700001				covid-19; SARS-CoV-2; Omicron; variant
2L7FUPZS	journalArticle	2022	Pettifor, Audrey; DiPrete, Bethany L.; Shook-Sa, Bonnie E.; Premkumar, Lakshmanane; Kuczynski, Kriste; Dittmer, Dirk; Aiello, Allison; Wallet, Shannon; Maile, Robert; Tan, Joyce; Jadi, Ramesh; Pluta, Linda; de Silva, Aravinda M.; Weber, David J.; Kim, Min; Sena, Arlene C.; Jones, Corbin D.	A prospective study of asymptomatic SARS-CoV-2 infection among individuals involved in academic research under limited operations during the COVID-19 pandemic	Plos One		1932-6203	10.1371/journal.pone.0267353		BackgroundEarly in the pandemic, transmission risk from asymptomatic infection was unclear, making it imperative to monitor infection in workplace settings. Further, data on SARS-CoV-2 seroprevalence within university populations has been limited. MethodsWe performed a longitudinal study of University research employees on campus July-December 2020. We conducted questionnaires on COVID-19 risk fa…	2022	2022/9/20 11:15	2022/9/20 11:15		e0267353		4	17		PLoS One								English							Place: San Francisco Publisher: Public Library Science WOS:000794129600003
P5E9WD4M	journalArticle	2022	Cai, Haobing; Zhou, Ran; Jiang, Fei; Zeng, Qiuming; Yang, Huan	Vaccination in neuromyelitis optica spectrum disorders: Friend or enemy?	Multiple Sclerosis and Related Disorders		2211-0348	10.1016/j.msard.2021.103394		Neuromyelitis optica spectrum disorders (NMOSDs) are uncommon antibody-mediated autoimmune diseases of the central nervous system (CNS), mainly occurring in optic nerves and spinal cord, which can cause visual impairment, paralysis, and occasionally bulbar dysfunction. Such neurological deficits can adversely affect pulmonary functions and increase complicated infection risk. Besides, most NMOSD …	Feb-22	2022/9/20 11:15	2022/9/20 11:15		103394			58		Mult. Scler. Relat. Disord.								English							Place: Oxford Publisher: Elsevier Sci Ltd WOS:000794082500017				covid-19; safety; Vaccination; therapy; vaccines; Autoimmune disease; autoimmune-diseases; azathioprine; double-blind; efficacy; Immunotherapy; multicenter; multiple-sclerosis; Neuromyelitis optica spectrum disorders; rituximab
AXPKPDH2	journalArticle	2022	Paschold, Lisa; Klee, Bianca; Gottschick, Cornelia; Willscher, Edith; Diexer, Sophie; Schultheiss, Christoph; Simnica, Donjete; Sedding, Daniel; Girndt, Matthias; Gekle, Michael; Mikolajczyk, Rafael; Binder, Mascha	Rapid Hypermutation B Cell Trajectory Recruits Previously Primed B Cells Upon Third SARS-Cov-2 mRNA Vaccination	Frontiers in Immunology		1664-3224	10.3389/fimmu.2022.876306		The COVID-19 pandemic shows that vaccination strategies building on an ancestral viral strain need to be optimized for the control of potentially emerging viral variants. Therefore, aiming at strong B cell somatic hypermutation to increase antibody affinity to the ancestral strain - not only at high antibody titers - is a priority when utilizing vaccines that are not targeted at individual varian…	2022/5/9	2022/9/20 11:15	2022/9/20 11:15		876306			13		Front. Immunol.								English							Place: Lausanne Publisher: Frontiers Media Sa WOS:000802253900001				covid-19; SARS-CoV-2; B cell maturation; booster vaccination; delta; omicron variant
KGFY39LK	journalArticle	2022	Kimball, Ethan; Buchwalder, Kyle; Upchurch, Cameron; Kea, Bory	Intermittent complete heart block with ventricular standstill after Pfizer COVID-19 booster vaccination: A case report	Journal of the American College of Emergency Physicians Open			10.1002/emp2.12723		As the COVID-19 pandemic continues around the globe, vaccines are undoubtedly central to the fight to control the spread of the virus. However, as with any therapy, these vaccines are not without side effects. Documented cardiac complications of COVID-19 vaccination include myocarditis, pericarditis, and cardiac conduction abnormalities. Here, we report a novel case of intermittent complete heart…	Apr-22	2022/9/20 11:15	2022/9/20 11:15		e12723		2	3		J. Am. Coll. Emerg. Phys. Open								English							Place: Hoboken Publisher: Wiley WOS:000783975900001				covid-19; vaccination; atrioventricular block; COVID-19 vaccines; heart block; heart arrest; myocarditis
HNUZY8K2	journalArticle	2022	Vallis, Michael; Bacon, Simon; Corace, Kim; Joyal-Desmarais, Keven; Sheinfeld Gorin, Sherri; Paduano, Stefania; Presseau, Justin; Rash, Joshua; Mengistu Yohannes, Abebaw; Lavoie, Kim	Ending the Pandemic: How Behavioural Science Can Help Optimize Global COVID-19 Vaccine Uptake	Vaccines			10.3390/vaccines10010007		Governments, public health officials and pharmaceutical companies have all mobilized resources to address the COVID-19 pandemic. Lockdowns, social distancing, and personal protective behaviours have been helpful but have shut down economies and disrupted normal activities. Vaccinations protect populations from COVID-19 and allow a return to pre-pandemic ways of living. However, vaccine developmen…	Jan-22	2022/9/20 11:15	2022/9/20 11:15		7		1	10		Vaccines								English							Place: Basel Publisher: Mdpi WOS:000747630100001				covid-19; hesitancy; influenza vaccination; acceptance; vaccine hesitancy; behaviour change; behavioural science; determinants; vaccine acceptance
H6BCGUCW	journalArticle		Shields, Adrian M.; Faustini, Sian E.; Hill, Harriet J.; Al-Taei, Saly; Tanner, Chloe; Ashford, Fiona; Workman, Sarita; Moreira, Fernando; Verma, Nisha; Wagg, Hollie; Heritage, Gail; Campton, Naomi; Stamataki, Zania; Klenerman, Paul; Thaventhiran, James E. D.; Goddard, Sarah; Johnston, Sarah; Huissoon, Aarnoud; Bethune, Claire; Elcombe, Suzanne; Lowe, David M.; Patel, Smita Y.; Savic, Sinisa; Bur…	SARS-CoV-2 Vaccine Responses in Individuals with Antibody Deficiency: Findings from the COV-AD Study	Journal of Clinical Immunology		0271-9142	10.1007/s10875-022-01231-7		Background Vaccination prevents severe morbidity and mortality from COVID-19 in the general population. The immunogenicity and efficacy of SARS-CoV-2 vaccines in patients with antibody deficiency is poorly understood. Objectives COVID-19 in patients with antibody deficiency (COV-AD) is a multi-site UK study that aims to determine the immune response to SARS-CoV-2 infection and vaccination in pati…		2022/9/20 11:15	2022/9/20 11:15							J. Clin. Immunol.								English							Place: New York Publisher: Springer/Plenum Publishers WOS:000782533800002				covid-19; SARS-CoV-2; Vaccination; cvid; immunodeficiency; Inborn errors of immunity; Primary immunodeficiency; Secondary immunodeficiency
HELCWVK5	journalArticle	2022	Sun, Xiaoyu; Liu, Caixuan; Lu, Xiao; Ling, Zhiyang; Yi, Chunyan; Zhang, Zhen; Li, Zi; Jin, Mingliang; Wang, Wenshuai; Tang, Shubing; Wang, Fangfang; Wang, Fang; Wangmo, Sonam; Chen, Shuangfeng; Li, Li; Ma, Liyan; Zhang, Yaguang; Yang, Zhuo; Dong, Xiaoping; Qian, Zhikang; Ding, Jianping; Wang, Dayan; Cong, Yao; Sun, Bing	Unique binding pattern for a lineage of human antibodies with broad reactivity against influenza A virus	Nature Communications			10.1038/s41467-022-29950-w		While most broadly neutralizing antibodies (bnAb) against Influenza virus target conserved conformational epitopes of the glycoprotein hemagglutinin (HA), Sun et al. characterize a lineage of bnAbs that neutralize group 1 and 2 strains. Structural characterization shows that antibody 28-12 binds a continuous epitope within H3 (group 2) but requires a conformational epitope for H1 (group 1) bindin…	2022/5/2	2022/9/20 11:15	2022/9/20 11:15		2378		1	13		Nat. Commun.								English							Place: Berlin Publisher: Nature Portfolio WOS:000789924700004				sars-cov-2; cryo-em; epitope; fusion; head; memory b-cells; monoclonal-antibody; receptor-binding; ucsf chimera; visualization
QBC8C3MX	journalArticle	2022	Cavani, Maurizio; Arnaldo Riofrio, Walter; Arciniega, Marcelino	Molecular Dynamics and MM-PBSA Analysis of the SARS-CoV-2 Gamma Variant in Complex with the hACE-2 Receptor	Molecules			10.3390/molecules27072370		The SARS-CoV-2 virus, since its appearance in 2019, has caused millions of cases and deaths. To date, there is no effective treatment or a vaccine that is fully protective. Despite the efforts made by governments and health institutions around the globe to control its propagation, the evolution of the virus has accelerated, diverging into hundreds of variants. However, not all of them are variant…	Apr-22	2022/9/20 11:15	2022/9/20 11:15		2370		7	27		Molecules								English							Place: Basel Publisher: Mdpi WOS:000780581300001				covid-19; SARS-CoV-2; binding; compensatory mutations; gamma variant; gromacs; interaction entropy; mm-pbsa; molecular dynamics; mutations; protein; residue specific interaction entropy; VoC's
AVTGEULJ	journalArticle	2022	Zheng, Qinyue; Wang, Xinwei; Pan, Qiuwei; Wang, Lei	Optimal strategy for a dose-escalation vaccination against COVID-19 in refugee camps	Aims Mathematics			10.3934/math.2022515		An immunogenic and safe vaccine against COVID-19 for use in the healthy population will become available in the near future. In this paper, we aim to determine the optimal vaccine administration strategy in refugee camps considering maximum daily administration and limited total vaccine supply. For this purpose, extended SEAIRD compartmental models are established to describe the epidemic dynamic…	2022	2022/9/20 11:15	2022/9/20 11:15		9288-9310		5	7		AIMS Math.								English							Place: Springfield Publisher: Amer Inst Mathematical Sciences-Aims WOS:000768695700002				covid-19; transmission; epidemic; dynamics; epidemic control; limited medical resources; optimal control; refugee camps; vaccine administration
RK9VVSRS	journalArticle	2022	Barmpounakis, Petros; Demiris, Nikolaos; Kontoyiannis, Ioannis; Pavlakis, George N.; Sypsa, Vana	Evaluating the effects of second-dose vaccine-delay policies in European countries: A simulation study based on data from Greece	Plos One		1932-6203	10.1371/journal.pone.0263977		The results of a simulation-based evaluation of several policies for vaccine rollout are reported, particularly focusing on the effects of delaying the second dose of two-dose vaccines. In the presence of limited vaccine supply, the specific policy choice is a pressing issue for several countries worldwide, and the adopted course of action will affect the extension or easing of non-pharmaceutical…	2022	2022/9/20 11:15	2022/9/20 11:15		e0263977		4	17		PLoS One								English							Place: San Francisco Publisher: Public Library Science WOS:000795468200035				covid-19; sars-cov-2 infection; bnt162b2; transmission; china
Z2U7NIL9	journalArticle	2022	Berar-Yanay, Noa; Freiman, Sarit; Shapira, MaMODIFIER L. E. T. T. E. R. PRIMEanit; Saffoury, Amer; Elemy, Ameer; Hamze, Munir; Elhaj, Mohamad; Zaher, Maha; Matanis, Loai; Armaly, Zaher Anis	Waning Humoral Response 3 to 6 Months after Vaccination with the SARS-COV-2 BNT162b2 mRNA Vaccine in Dialysis Patients	Journal of Clinical Medicine			10.3390/jcm11010064		Background and objectives: The short-term reported antibody response to SARS-COV-2 vaccination in dialysis patients is high, with a seroconversion response rate up to 97%. Data on the long-term durability of this response are scarce. Our objective was to characterize the long-term anti-spike antibody level in dialysis patients. Design, setting, participants, and measurements: In an observational …	Jan-22	2022/9/20 11:15	2022/9/20 11:15		64		1	11		J. Clin. Med.								English							Place: Basel Publisher: Mdpi WOS:000760459800001				covid-19; antibody; BNT162b2 mRNA vaccine; chronic kidney-disease; dialysis; end stage renal disease; hemodialysis; sar s-cov-2; waning
HGUM2JDY	journalArticle	2022	Wong, Wilfred Hing-Sang; Leung, Daniel; Chua, Gilbert T.; Duque, Jaime Sou Da Rosa; Peare, Sinead; So, Hung Kwan; Chan, Sau Man; Kwan, Mike Yat-Wah; Ip, Patrick; Lau, Yu Lung	Survey data on the attitudes of adolescents in Hong Kong towards the COVID-19 vaccination	Data in Brief		2352-3409	10.1016/j.dib.2022.108069		To our best knowledge, this article presents a novel data set on Hong Kong's adolescents' attitude towards the COVID-19 vaccination, excluding their parental opinions. This research used a cross-sectional questionnaire survey, which collects data from the population at a single point in time. Our questionnaire was designed in both English and Chinese for the adolescents' convenience, using a self…	Jun-22	2022/9/20 11:15	2022/9/20 11:15		108069			42		Data Brief								English							Place: Amsterdam Publisher: Elsevier WOS:000779010200007				covid-19; Vaccine; Attitudes; Paediatrics; Public health
PR6UQER5	journalArticle	2022	Hollinghurst, Joe; Hollinghurst, Robyn; North, Laura; Mizen, Amy; Akbari, Ashley; Long, Sara; Lyons, Ronan A.; Fry, Rich	COVID-19 risk factors amongst 14,786 care home residents: an observational longitudinal analysis including daily community positive test rates of COVID-19, hospital stays and vaccination status in Wales (UK) between 1 September 2020 and 1 May 2021	Age and Ageing		0002-0729	10.1093/ageing/afac084		Background COVID-19 vaccinations have been prioritised for high risk individuals. Aim Determine individual-level risk factors for care home residents testing positive for SARS-CoV-2. Study design Longitudinal observational cohort study using individual-level linked data from the Secure Anonymised Information Linkage (SAIL) databank. Setting Fourteen thousand seven hundred and eighty-six older car…	2022/5/1	2022/9/20 11:15	2022/9/20 11:15		afac084		5	51		Age Ageing								English							Place: Oxford Publisher: Oxford Univ Press WOS:000790920000001				covid-19; vaccination; care homes; hospital infection; older people; older-people; outbreaks; PCR tests
VTVSMCAM	journalArticle	2022	Sarode, Apoorva; Fan, Yuchen; Byrnes, Amy E.; Hammel, Michal; Hura, Greg L.; Fu, Yige; Kou, Ponien; Hu, Chloe; Hinz, Flora; Roberts, Jasmine; Koenig, Stefan G.; Nagapudi, Karthik; Hoogenraad, Casper C.; Chen, Tao; Leung, Dennis; Yen, Chun-Wan	Predictive high-throughput screening of PEGylated lipids in oligonucleotide-loaded lipid nanoparticles for neuronal gene silencing	Nanoscale Advances		2516-0230	10.1039/d1na00712b		Lipid nanoparticles (LNPs) are gaining traction in the field of nucleic acid delivery following the success of two mRNA vaccines against COVID-19. As one of the constituent lipids on LNP surfaces, PEGylated lipids (PEG-lipids) play an important role in defining LNP physicochemical properties and biological interactions. Previous studies indicate that LNP performance is modulated by tuning PEG-lip…	2022/5/3	2022/9/20 11:15	2022/9/20 11:15		2107-2123		9	4		Nanoscale Adv.								English							Place: Cambridge Publisher: Royal Soc Chemistry WOS:000750964600001				challenges; cholesterol; dna delivery; formulation; liposomes; mixtures; nucleic-acids; phase; poly(ethylene glycol); x-ray-scattering
9PKTZ9L7	journalArticle	2022	Abdullah, Samsuri; Imran, Muhammad Azhari; Abu Mansor, Amalina; Yusof, Ku Mohd Kalkausar Ku; Dom, Nazri Che; Saijan, Siti Khamisah; Yatim, Siti Rohana Mohd; Ahmed, Ali Najah; Ismail, Marzuki	Association of Air Pollutant Index (API) on SARS-CoV-2 of Coronavirus Disease 2019 (COVID-19) in Malaysia	Asian Journal of Atmospheric Environment		1976-6912	10.5572/ajae.2021.094		Malaysia reported its first COVID-19 case on January 25, 2020, and the cases have continued to grow, necessitating the implementation of additional measures. Hence, determining the factors responsible for the significant increase in COVID-19 cases is the top priority issue for the government to take necessary action and ultimately restrain this virus before the vaccine availability. Researchers h…	Mar-22	2022/9/20 11:15	2022/9/20 11:15		2021094		1	16		Asian J. Atmos. Environ.								English							Place: Seoul Publisher: Asian Assoc Atmospheric Environment WOS:000796482900004				covid-19; transmission; Air pollutant index; Malaysia; outbreak; Prevalence; relative-humidity; temperature; time; Virus infection
WGFHNJJ8	journalArticle	2022	Valentini, Diletta; Cotugno, Nicola; Scoppola, Vittorio; Di Camillo, Chiara; Colagrossi, Luna; Manno, Emma Concetta; Perno, Carlo Federico; Russo, Cristina; Palma, Paolo; Rossi, Paolo; Villani, Alberto	Safety and Long-Term Immunogenicity of BNT162b2 Vaccine in Individuals with Down Syndrome	Journal of Clinical Medicine			10.3390/jcm11030694		We aimed to evaluate the safety and immunogenicity of the BNT162b2 vaccine in young people with Down syndrome (DS), and to compare their humoral immune response with those of the healthy controls (HC). Individuals with DS and HC received the BNT162b2 vaccine. Longitudinal blood samples were collected on the day of vaccination, twenty-one days after the first dose, seven days after the second dose…	Feb-22	2022/9/20 11:15	2022/9/20 11:15		694		3	11		J. Clin. Med.								English							Place: Basel Publisher: Mdpi WOS:000754802400001				covid-19; memory b-cells; down syndrome; humoral response; mRNA vaccination; syndrome children
DTPDT42R	journalArticle	2022	Lin, Yi-Hsin; Huang, Hsuan; Hwang, Wen-Zern	Moyamoya disease with Sjogren disease and autoimmune thyroiditis presenting with left intracranial hemorrhage after messenger RNA-1273 vaccination A case report	Medicine		0025-7974	10.1097/MD.0000000000028756		Rationale: The new vaccines are emergently authorized and currently approved for use to protect against the coronavirus disease 2019 (COVID-19) pandemic and serious adverse events are uncommon. Moyamoya disease (MMD) with autoimmune disease is a rare entity and usually presents with intracranial hemorrhage in adults. Patient concerns: We reported a 40-year-old female patient with Sjogren disease …	2022/2/11	2022/9/20 11:15	2022/9/20 11:15		e28756		6	101		Medicine (Baltimore)								English							Place: Philadelphia Publisher: Lippincott Williams & Wilkins WOS:000753996800041				COVID-19 vaccine; association; autoimmune disease; brain hemorrhage; moyamoya; rnf213
7J5HWB25	journalArticle	2022	Vallejo, Alejandro; Martin-Hondarza, Adrian; Gomez, Sandra; Velasco, Hector; Vizcarra, Pilar; Haemmerle, Johannes; Casado, Jose L.	Cellular Responses to Membrane and Nucleocapsid Viral Proteins Are Also Boosted After SARS-CoV-2 Spike mRNA Vaccination in Individuals With Either Past Infection or Cross-Reactivity	Frontiers in Microbiology			10.3389/fmicb.2021.812729		SARS-CoV-2 spike mRNA vaccines have shown remarkable clinical efficacy in the general population, although the nature of T-cell priming is not fully understood. We performed longitudinal spike-, membrane-, and nucleocapsid-specific T-cell analysis in individuals with past infection and infection-naive individuals with cross-reactivity. We found an additional enhancement of T-cell response to the …	2022/2/11	2022/9/20 11:15	2022/9/20 11:15		812729			12		Front. Microbiol.								English							Place: Lausanne Publisher: Frontiers Media Sa WOS:000761120500001				covid-19; SARS-CoV-2; epitope; cellular immune response; cross-reactivity; mRNA vaccine; t-cells
TF762GBY	journalArticle	2022	Ozakbas, Serkan; Baba, Cavid; Dogan, Yavuz; Cevik, Sumeyye; Ozcelik, Sinem; Kaya, Ergi	Comparison of SARS-CoV-2 antibody response after two doses of mRNA and inactivated vaccines in multiple sclerosis patients treated with disease-modifying therapies	Multiple Sclerosis and Related Disorders		2211-0348	10.1016/j.msard.2022.103486		Background: Disease-modifying therapy could weaken the immune system and decrease the immune response to vaccines. It is essential to know which vaccine is more protective against SARS-CoV-2 in the multiple sclerosis population.& nbsp;Objective: To assess immune response after messenger RNA BNT162b2 (Pfizer/BioNTech) and inactivated Sinovac vaccines in people with multiple sclerosis (pwMS) treate…	Feb-22	2022/9/20 11:15	2022/9/20 11:15		103486			58		Mult. Scler. Relat. Disord.								English							Place: Oxford Publisher: Elsevier Sci Ltd WOS:000794082500020				covid-19; mRNA vaccine; Disease-modifying therapy; Multiple sclerosis
4ZCWNU93	journalArticle	2022	AlRuthia, Yazed; Al-Salloum, Haya F.; Almohammed, Omar A.; Alqahtani, Amani S.; Al-Abdulkarim, Hana A.; Alsofayan, Yousef M.; Almudarra, Sami S.; AlQahtani, Sara H.; Almutlaq, Abdullah; Alabdulkareem, Khaled; Balkhi, Bander; Almutairi, Hamoud T.; Alanazi, Abdullah S.; Asiri, Yousif A.	Demographic Characteristics and Status of Vaccinated Individuals with a History of COVID-19 Infection Pre- or Post-Vaccination: A Descriptive Study of a Nationally Representative Sample in Saudi Arabia	Vaccines			10.3390/vaccines10020323		Background: Saudi Arabia expedited the approval of some COVID-19 vaccines and launched mass vaccination campaigns. The aim of this study was to describe the demographics of vaccinated COVID-19 cases and compare the mortality rates of COVID-19 cases who were infected post-vaccination in Saudi Arabia. Methods: This was a retrospective cohort study. We retrieved data for COVID-19 cases who were infe…	Feb-22	2022/9/20 11:15	2022/9/20 11:15		323		2	10		Vaccines								English							Place: Basel Publisher: Mdpi WOS:000762007900001				covid-19; efficacy; clinical characteristics; demographics; Oxford-AstraZeneca COVID-19 vaccine; Pfizer COVID-19 vaccine; Saudi Arabia
24A4N5Q3	journalArticle	2022	Duarte, Catherine; Cameron, Drew B.; Kwan, Ada T.; Bertozzi, Stefano M.; Williams, Brie A.; McCoy, Sandra I.	COVID-19 outbreak in a state prison: a case study on the implementation of key public health recommendations for containment and prevention	Bmc Public Health			10.1186/s12889-022-12997-1		Background People incarcerated in US prisons have been disproportionately harmed by the COVID-19 pandemic. That prisons are such efficient superspreading environments can be attributed to several known factors: small, communal facilities where people are confined for prolonged periods of time; poor ventilation; a lack of non-punitive areas for quarantine/medical isolation; and staggeringly high n…	2022/5/14	2022/9/20 11:15	2022/9/20 11:15		977		1	22		BMC Public Health								English							Place: London Publisher: Bmc WOS:000796059400002				covid-19; Vaccination; Case study; Conceptual framework; Decarceration; Policy; Prisons
FWC8W5WR	journalArticle	2022	Chandran, Aneesh; Rosenheim, Joshua; Nageswaran, Gayathri; Swadling, Leo; Pollara, Gabriele; Gupta, Rishi K.; Burton, Alice R.; Guerra-Assuncao, Jose Afonso; Woolston, Annemarie; Ronel, Tahel; Pade, Corinna; Gibbons, Joseph M.; De Estrada, Blanca Sanz-Magallon Duque; de Massy, Marc Robert; Whelan, Matthew; Semper, Amanda; Brooks, Tim; Altmann, Daniel M.; Boyton, Rosemary J.; McKnight, Aine; Captu…	Rapid synchronous type 1 IFN and virus-specific T cell responses characterize first wave non-severe SARS-CoV-2 infections	Cell Reports Medicine		2666-3791	10.1016/j.xcrm.2022.100557		Effective control of SARS-CoV-2 infection on primary exposure may reveal correlates of protective immunity to future variants, but we Jack insights into immune responses before or at the time virus is first detected. We use blood transcriptomics, multiparameter flow cytometry, and T cell receptor (TCR) sequencing spanning the time of incident non-severe infection in unvaccinated virus-naive indiv…	2022/3/15	2022/9/20 11:15	2022/9/20 11:15		100557		3	3		Cell Rep. Med.								English							Place: Amsterdam Publisher: Elsevier WOS:000787071300021				protection
XXIMYKNJ	journalArticle		Wood, Geoffrey T.; Onali, Enrico; Grosman, Anna; Haider, Zulfiquer Ali	A very British state capitalism: Variegation, political connections and bailouts during the COVID-19 crisis	Environment and Planning a-Economy and Space		0308-518X	10.1177/0308518X211072545		The COVID-19 pandemic has resulted in governments playing increasingly prominent roles as active economic agents. However, state capitalism does not necessarily serve broad developmental purposes, and rather can be directed to supporting sectional and private interests. As the literature on variegated capitalism alerts us, governments and other actors regularly devise fixes in response to a syste…		2022/9/20 11:15	2022/9/20 11:15		0308518X211072545					Environ. Plan. A								English							Place: Thousand Oaks Publisher: Sage Publications Inc WOS:000759693900001				covid-19; bailouts; bank bailouts; business; comparative institutional theory; crony capitalism; economic crisis; economy; less; Liberal Market Economy; model; political connections; State capitalism; state capture; United Kingdom; variegation
H2FG5MBT	journalArticle		Li, Yongzheng; Wang, Xiuwen; Jin, Junyan; Ma, Zhenglai; Liu, Yan; Zhang, Xin; Su, Bin	T-cell responses to SARS-CoV-2 Omicron spike epitopes with mutations after the third booster dose of an inactivated vaccine	Journal of Medical Virology		0146-6615	10.1002/jmv.27814		The rapidly spreading severe acute respiratory syndrome coronavirus 2 (SARS-CoV-2) Omicron variant contains more than 30 mutations that mediate escape from antibody responses elicited by prior infection or current vaccines. Fortunately, T-cell responses are highly conserved in most individuals, but the impacts of mutations are not clear. Here, we showed that the T-cell responses of individuals wh…		2022/9/20 11:15	2022/9/20 11:15							J. Med. Virol.								English							Place: Hoboken Publisher: Wiley WOS:000791466900001				SARS-CoV-2; vaccine; Omicron; mutations; T-cell responses
TYVPITEN	journalArticle	2022	Al Kaabi, Nawal; Oulhaj, Abderrahim; Al Hosani, Farida Ismail; Al Mazrouei, Shamma; Najim, Omer; Hussein, Salah Eldin; Abdalla, Jehad Saleh; Fasihuddin, Mohammed Saifuddin; Hassan, Afnan Abdellatif; Elghazali, Gehad; Al Rumaithi, Ahmed; Al Azazi, Jumana; Weber, Stefan; Beiram, Rami; Parekh, Khatija A.; Sheek-Hussein, Mohamud; Yang, Yunkai; Xiaoming, Yang; Quliang, Jenny; Eltantawy, Islam; Mahmoud…	The incidence of COVID-19 infection following emergency use authorization of BBIBP-CORV inactivated vaccine in frontline workers in the United Arab Emirates	Scientific Reports		2045-2322	10.1038/s41598-021-04244-1		Based on the findings from the Phase III clinical trials of inactivated SARS COV-2 Vaccine, (BBIBP-CORV) emergency use authorization (EUA) was granted for the vaccine to frontline workers in the UAE. A prospective cohort study was conducted among frontline workers to estimate the incidence rate and risk of symptomatic COVID-19 infection 14 days after the second dose of inoculation with BBIBP-CORV…	2022/1/11	2022/9/20 11:15	2022/9/20 11:15		490		1	12		Sci Rep								English							Place: Berlin Publisher: Nature Portfolio WOS:000783767400045
2X3RLUTB	journalArticle	2022	Tande, Aaron J.; Pollock, Benjamin D.; Shah, Nilay D.; Farrugia, Gianrico; Virk, Abinash; Swift, Melanie; Breeher, Laura; Binnicker, Matthew; Berbari, Elie F.	Impact of the Coronavirus Disease 2019 (COVID-19) Vaccine on Asymptomatic Infection Among Patients Undergoing Preprocedural COVID-19 Molecular Screening	Clinical Infectious Diseases		1058-4838	10.1093/cid/ciab229		Background Several vaccines are now available under emergency use authorization in the United States and have demonstrated efficacy against symptomatic COVID-19. Vaccine impact on asymptomatic severe acute respiratory syndrome coronavirus 2 (SARS-CoV-2) infection is largely unknown. Methods We conducted a retrospective cohort study of consecutive, asymptomatic adult patients (n=39 156) within a l…	2022/1/1	2022/9/20 11:15	2022/9/20 11:15		59-65		1	74		Clin. Infect. Dis.								English							Place: Cary Publisher: Oxford Univ Press Inc WOS:000780096300009				covid-19; SARS-CoV-2; vaccination; asymptomatic
ALHC7WKV	journalArticle	2022	Bryan, Kevin A.; Lemus, Jorge; Marshall, Guillermo	R&D competition and the direction of innovation *	International Journal of Industrial Organization		0167-7187	10.1016/j.ijindorg.2022.102841		We propose a model to show that when innovation in a given field becomes more lucrative, its direction can be distorted even though its rate rises. Higher payoffs attract innovators, making the R&D supply side more competitive. This competition endogenously shifts effort toward less promising but quicker-to-invent projects. We empirically quantify the magnitude of this distortion, in the context …	May-22	2022/9/20 11:15	2022/9/20 11:15		102841			82		Int. J. Ind. Organ.								English							Place: Amsterdam Publisher: Elsevier WOS:000794432000001				Direction of innovation; Innovation; Market inefficiency; Pharmaceutical innovation
D7EUUVUM	journalArticle	2022	Shahriar, Sakib; Al-Ali, A. R.	Impacts of COVID-19 on Electric Vehicle Charging Behavior: Data Analytics, Visualization, and Clustering	Applied System Innovation			10.3390/asi5010012		COVID-19 pandemic has infected millions and led to a catastrophic loss of lives globally. It has also significantly disrupted the movement of people, businesses, and industries. Additionally, electric vehicle (EV) users have faced challenges in charging their vehicles in public charging locations where there is a risk of COVID-19 exposure. However, a case study of EV charging behavior and its imp…	Feb-22	2022/9/20 11:15	2022/9/20 11:15		12		1	5		Appl. Syst. Innov.								English							Place: Basel Publisher: Mdpi WOS:000769760100001				covid-19; mobility; charging infrastructure; cluster analysis; data analytics; low emission vehicles
5RW2Y4WL	journalArticle	2022	Lei, Hong; Alu, Aqu; Yang, Jingyun; Ren, Wenyan; He, Cai; Lan, Tianxia; He, Xuemei; Yang, Li; Li, Jiong; Wang, Zhenling; Song, Xiangrong; Wang, Wei; Lu, Guangwen; Wei, Xiawei	Intranasal administration of a recombinant RBD vaccine induces long-term immunity against Omicron-included SARS-CoV-2 variants	Signal Transduction and Targeted Therapy		2095-9907	10.1038/s41392-022-01002-1		The outbreak of coronavirus disease 2019 (COVID-19) has posed great threats to global health and economy. Several effective vaccines are available now, but additional booster immunization is required to retain or increase the immune responses owing to waning immunity and the emergency of new variant strains. The deficiency of intramuscularly delivered vaccines to induce mucosal immunity urged the…	2022/5/17	2022/9/20 11:15	2022/9/20 11:15		159		1	7		Signal Transduct. Target. Ther.								English							Place: London Publisher: Springernature WOS:000796957100001				covid-19; memory; adjuvant; antigen; cd8(+) t-cells
V9ZZ4FI8	journalArticle		Andreozzi, Valentina; D'arco, Beatrice; Pagliano, Pasquale; Toriello, Antonella; Barone, Paolo	Bilateral facial palsy after COVID-19 vaccination	Neurological Sciences		1590-1874	10.1007/s10072-022-05982-4		Guillain-Barre syndrome (GBS) is an acute immune-mediated neuropathy, possibly triggered by a recent infection or vaccination, and driven by an immune attack targeting the peripheral nervous system. GBS typically leads to ascending limb weakness, often with sensory and cranial nerve involvement 1-2 weeks after immune stimulation, but emergency and neurology physicians should be aware of its impor…		2022/9/20 11:15	2022/9/20 11:15							Neurol. Sci.								English							Place: Milan Publisher: Springer-Verlag Italia Srl WOS:000777239900001				Bifacial weakness; COVID-19 vaccination; diplegia; Guillain-Barre syndrome; guillain-barre-syndrome; subtype
QNC6WSML	journalArticle		Viskupic, Filip; Wiltse, David L.; Meyer, Brittney A.	Beyond vaccination: messaging from religious leaders can help increase adherence to COVID-19 mitigation guidelines following vaccination. A research note	Social Science Journal		0362-3319	10.1080/03623319.2022.2049557		Despite the progress in vaccination, the COVID-19 pandemic is far from over in the United States. Due to lingering questions about the virus transmissivity and the emergence of new highly infectious strands, experts believe even fully vaccinated people should continue to adhere to mitigation guidelines, such as mask wearing. We conducted a survey experiment to investigate if messages from differe…		2022/9/20 11:15	2022/9/20 11:15							Soc. Sci. J.								English							Place: Abingdon Publisher: Routledge Journals, Taylor & Francis Ltd WOS:000772326400001				covid-19; communication; COVID-19 mitigation guidelines; messenger; public policy; survey experiment
MJGEP9PW	journalArticle		Fouad, Ahmad A.; El Antably, Ahmed	Agent-based modeling and simulation of pandemic propagation in a school environment	International Journal of Architectural Computing		1478-0771	10.1177/14780771221089886		Spatial behavior is a principal aspect for architects to consider. Unfortunately, it is sometimes hard to predict, as users of space seldom follow a standard routine. However, predicting user behavior in a space can potentially illuminate the entire design process. Moreover, it is a key factor in fighting the recent COVID-19 pandemic. Until most of the public gets their vaccine, health officials …		2022/9/20 11:15	2022/9/20 11:15							Int. J. Archit. Comput.								English							Place: London Publisher: Sage Publications Ltd WOS:000797293400001				covid-19; agent-based modeling and simulation; human behavior simulations; human-behavior; multi-agent system; spatial behavior; spread; trees; walking
38TG2RSZ	journalArticle		Hao, Jinqi; Liu, Huimin; Shi, Jihai; Wang, Qiufeng; Su, Xiaoyou; Shi, Zhengyang; Yu, Yanqin; Liu, Bo; Qiao, Youlin	A study on the willingness and influencing factors of novel coronavirus vaccination among medical personnel in North China	Human Vaccines & Immunotherapeutics		2164-5515	10.1080/21645515.2022.2031775		Aim: To understand the awareness of the willingness to be vaccinated and influencing factors of the new coronavirus vaccine (neo-crown vaccine) among medical personnel in North China and to provide a theoretical basis and application guidelines for the feasibility of coronavirus vaccination by medical personnel to guide the public to actively be vaccinated by taking initiative and obtaining a cor…		2022/9/20 11:15	2022/9/20 11:15							Human Vaccines Immunother.								English							Place: Philadelphia Publisher: Taylor & Francis Inc WOS:000778114100001				sars-cov-2; covid-19 vaccination; influencing factors; medical personnel; New coronavirus vaccine; willingness to vaccinate
6L4HUCZ7	journalArticle		Gao, David X.; Fisher, Lloyd D.; Miller, Donald R.; Geller, Alan C.	Inequities in coronavirus disease 2019 (COVID-19) Vaccination Rates Among Adolescents in Massachusetts: A Cross-sectional Study	Clinical Infectious Diseases		1058-4838	10.1093/cid/ciac123		Background The coronavirus disease 2019 (COVID-19) pandemic has disproportionately affected more socioeconomically disadvantaged persons and areas. We sought to determine how certain sociodemographic factors were correlated to adolescents' COVID-19 vaccination rates in towns and cities ("communities") in the Commonwealth of Massachusetts. Methods Data on COVID-19 vaccination rates were obtained o…		2022/9/20 11:15	2022/9/20 11:15							Clin. Infect. Dis.								English							Place: Cary Publisher: Oxford Univ Press Inc WOS:000784695800001				covid-19; adolescents; health disparities; Massachusetts
47L3KZCM	journalArticle	2022	Di Felice, Giulia; Visci, Giovanni; Teglia, Federica; Angelini, Marco; Boffetta, Paolo	Effect of cancer on outcome of COVID-19 patients: a systematic review and meta-analysis of studies of unvaccinated patients	Elife		2050-084X	10.7554/eLife.74634		Background:& nbsp;Since the beginning of the SARS-CoV-2 pandemic, cancer patients affected by COVID-19 have been reported to experience poor prognosis; however, a detailed quantification of the effect of cancer on outcome of unvaccinated COVID-19 patients has not been performed.& nbsp;Methods:& nbsp;To carry out a systematic review of the studies comparing the outcome of unvaccinated COVID-19 pat…	2022/2/16	2022/9/20 11:15	2022/9/20 11:15		e74634			11		eLife								English							Place: Cambridge Publisher: eLIFE SCIENCES PUBL LTD WOS:000788808600001				covid-19; SARS-CoV-2; cancer; mortality; multicenter; clinical characteristics; disease severity; Human; meta-analysis; severity
XFHJ55KS	journalArticle		Doeblin, Patrick; Jahnke, Constantin; Schneider, Matthias; Al-Tabatabaee, Sarah; Goetze, Collin; Weiss, Karl J.; Tanacli, Radu; Faragli, Alessandro; Witt, Undine; Stehning, Christian; Seidel, Franziska; Elsanhoury, Ahmed; Kuehne, Titus; Tschoepe, Carsten; Pieske, Burkert; Kelle, Sebastian	CMR findings after COVID-19 and after COVID-19-vaccination-same but different?	International Journal of Cardiovascular Imaging		1569-5794	10.1007/s10554-022-02623-x		Cardiac involvement has been described in varying proportions of patients recovered from COVID-19 and proposed as a potential cause of prolonged symptoms, often described as post-COVID or long COVID syndrome. Recently, cardiac complications have been reported from COVID-19 vaccines as well. We aimed to compare CMR-findings in patients with clinical cardiac symptoms after COVID-19 and after vaccin…		2022/9/20 11:15	2022/9/20 11:15							Int. J. Cardiovasc. Imaging								English							Place: Dordrecht Publisher: Springer WOS:000794072100001				covid-19; vaccination; diagnosis; Myocarditis; management; COVID-19 vaccines; cardiovascular magnetic-resonance; cmr; european association; Long COVID; myocardial injury; Pericarditis; society; statement; task-force
9WLKKDSU	journalArticle		Ojo, Mayowa M.; Peter, Olumuyiwa James; Goufo, Emile Franc Doungmo; Panigoro, Hasan S.; Oguntolu, Festus Abiodun	Mathematical model for control of tuberculosis epidemiology	Journal of Applied Mathematics and Computing		1598-5865	10.1007/s12190-022-01734-x		Tuberculosis is an infectious disease caused by bacteria that most commonly affects the lungs. Due to its high mortality, it remains a global health issue, and it is one of the leading causes of death in the majority of sub-Saharan African countries. We formulate a six-compartmental deterministic model to investigate the impact of vaccination on the dynamics of tuberculosis in a given population.…		2022/9/20 11:15	2022/9/20 11:15							J. Appl. Math. Comput.								English							Place: Heidelberg Publisher: Springer Heidelberg WOS:000785582900001				covid-19; impact; transmission; efficacy; dynamics; time; backward bifurcation; bcg vaccine; Bifurcation analysis; Effective reproduction number; fever; stability; Stability analysis; Tuberculosis model
GZBX39JK	journalArticle	2022	Auerswald, Heidi; Eng, Chanreaksmey; Lay, Sokchea; In, Saraden; Eng, Sokchea; Vo, Hoa Thi My; Sith, Charya; Cheng, Sokleaph; Delvallez, Gauthier; Mich, Vann; Meng, Ngy; Sovann, Ly; Sidonn, Kraing; Vanhomwegen, Jessica; Cantaert, Tineke; Dussart, Philippe; Duong, Veasna; Karlsson, Erik A.	Rapid Generation of In-House Serological Assays Is Comparable to Commercial Kits Critical for Early Response to Pandemics: A Case With SARS-CoV-2	Frontiers in Medicine			10.3389/fmed.2022.864972		IntroductionAccurate and sensitive measurement of antibodies is critical to assess the prevalence of infection, especially asymptomatic infection, and to analyze the immune response to vaccination during outbreaks and pandemics. A broad variety of commercial and in-house serological assays are available to cater to different laboratory requirements; however direct comparison is necessary to under…	2022/5/6	2022/9/20 11:15	2022/9/20 11:15		864972			9		Front. Med.								English							Place: Lausanne Publisher: Frontiers Media Sa WOS:000800115600001				SARS-CoV-2; kinetics; elisa; immunoassay; prnt; serology
6WMD5FPR	journalArticle		Rulli, Tina; Campbell, Stephen	Can "My Body, My Choice" anti-vaxxers be pro-life?	Bioethics		0269-9702	10.1111/bioe.13033		Many "anti-vaxxers" oppose COVID-19 vaccination mandates on the grounds that they wrongfully infringe on bodily autonomy. Their view has been expressed with the slogan "My Body, My Choice," co-opted from the pro-choice abortion rights movement. Yet, many of those same people are pro-life and support abortion restrictions that are effectively a kind of gestation mandate. Both vaccine and gestation…		2022/9/20 11:15	2022/9/20 11:15							Bioethics								English							Place: Hoboken Publisher: Wiley WOS:000777957100001				covid-19; vaccines; abortion; anti-vax; pro-life; vaccine mandate
BUDFHF2K	journalArticle	2022	Pugh, Jonathan; Savulescu, Julian; Brown, Rebecca C. H.; Wilkinson, Dominic	The unnaturalistic fallacy: COVID-19 vaccine mandates should not discriminate against natural immunity	Journal of Medical Ethics		0306-6800	10.1136/medethics-2021-107956		COVID-19 vaccine requirements have generated significant debate. Here, we argue that, on the evidence available, such policies should have recognised proof of natural immunity as a sufficient basis for exemption to vaccination requirements. We begin by distinguishing our argument from two implausible claims about natural immunity: (1) natural immunity is superior to 'artificial' vaccine-induced i…	Jun-22	2022/9/20 11:15	2022/9/20 11:15		371-377		6	48		J. Med. Ethics								English							Place: London Publisher: Bmj Publishing Group WOS:000766733600001				covid-19; sars-cov-2; ethics; public policy; reasons; reinfection
UDQBZK2S	journalArticle	2022	Nunhofer, Verena; Weidner, Lisa; Hoeggerl, Alexandra Domnica; Zimmermann, Georg; Badstuber, Natalie; Grabmer, Christoph; Jungbauer, Christof; Lindlbauer, Nadja; Held, Nina; Pascariuc, Monica; Ortner, Tuulia; Rohde, Eva; Laner-Plamberger, Sandra	Persistence of Naturally Acquired and Functional SARS-CoV-2 Antibodies in Blood Donors One Year after Infection	Viruses-Basel			10.3390/v14030637		The developmental course of antibodies produced after a SARS-CoV-2 infection has been insufficiently investigated so far. Therefore, the aim of this study was to investigate the dynamics of SARS-CoV-2 antibody levels against the viral nucleocapsid- and spike-protein among Austrian blood donors as a representative group of a supposedly healthy population within the first year after a SARS-CoV-2 in…	Mar-22	2022/9/20 11:15	2022/9/20 11:15		637		3	14		Viruses-Basel								English							Place: Basel Publisher: Mdpi WOS:000774518300001				covid-19; SARS-CoV-2; seroprevalence; antibodies; long-COVID; protein; association; AB0 blood groups; blood donation; prevalence
2YYB2CXW	journalArticle	2022	Zhang, Chunyan; Xu, Songhua; Li, Zongfang; Liu, Ge; Dai, Duwei; Dong, Caixia	The Evolution and Disparities of Online Attitudes Toward COVID-19 Vaccines: Year-long Longitudinal and Cross-sectional Study	Journal of Medical Internet Research		1438-8871	10.2196/32394		Background: Due to the urgency caused by the COVID-19 pandemic worldwide, vaccine manufacturers have to shorten and parallel the development steps to accelerate COVID-19 vaccine production. Although all usual safety and efficacy monitoring mechanisms remain in place, varied attitudes toward the new vaccines have arisen among different population groups. Objective: This study aimed to discern the …	2022/1/21	2022/9/20 11:15	2022/9/20 11:15		e32394		1	24		J. Med. Internet Res.								English							Place: Toronto Publisher: Jmir Publications, Inc WOS:000766782100001				covid-19; pandemic; vaccine; attitude; data mining; disparity; evolution; population group; Twitter
B24PUA3L	journalArticle	2022	Song, Zhiqi; Bao, Linlin; Deng, Wei; Liu, Jiangning; Ren, Erjun; Lv, Qi; Liu, Mingya; Qi, Feifei; Chen, Ting; Deng, Ran; Li, Fengdi; Liu, Yunpeng; Wei, Qiang; Gao, Hong; Yu, Pin; Han, Yunlin; Zhao, Wenjie; Zheng, Junjun; Liang, Xujian; Yang, Fuhe; Qin, Chuan	Integrated histopathological, lipidomic, and metabolomic profiles reveal mink is a useful animal model to mimic the pathogenicity of severe COVID-19 patients	Signal Transduction and Targeted Therapy		2095-9907	10.1038/s41392-022-00891-6		Severe acute respiratory syndrome coronavirus 2 (SARS-CoV-2) is transmitted on mink farms between minks and humans in many countries. However, the systemic pathological features of SARS-CoV-2-infected minks are mostly unknown. Here, we demonstrated that minks were largely permissive to SARS-CoV-2, characterized by severe and diffuse alveolar damage, and lasted at least 14 days post inoculation (d…	2022/1/28	2022/9/20 11:15	2022/9/20 11:15		29		1	7		Signal Transduct. Target. Ther.								English							Place: London Publisher: Springernature WOS:000748257200001
VH8MZER8	journalArticle		Jutel, Marek; Torres, Maria J.; Palomares, Oscar; Akdis, Cezmi A.; Eiwegger, Thomas; Untersmayr, Eva; Barber, Domingo; Zemelka-Wiacek, Magdalena; Kosowska, Anna; Palmer, Elizabeth; Vieths, Stefan; Mahler, Vera; Canonica, Walter G.; Nadeau, Kari; Shamji, Mohamed H.; Agache, Ioana; Akdis, Mubeccel; Khaitov, Musa; Alvarez-Perea, Alberto; Alvaro-Lozano, Montserrat; Atanaskovic-Markovic, Marina; Backe…	COVID-19 vaccination in patients receiving allergen immunotherapy (AIT) or biologicals-EAACI recommendations	Allergy		0105-4538	10.1111/all.15252		Immune modulation is a key therapeutic approach for allergic diseases, asthma and autoimmunity. It can be achieved in an antigen-specific manner via allergen immunotherapy (AIT) or in an endotype-driven approach using biologicals that target the major pathways of the type 2 (T2) immune response: immunoglobulin (Ig)E, interleukin (IL)-5 and IL-4/IL-13 or non-type 2 response: anti-cytokine antibodi…		2022/9/20 11:15	2022/9/20 11:15							Allergy								English							Place: Hoboken Publisher: Wiley WOS:000770377100001				infection; safety; influenza vaccination; vaccines; mRNA vaccines; allergen; allergy; biologicals; Covid-19; down-regulation; immune-responses; immunogenicity; immunotherapy; sars; severe asthma; t-cell responses
SNMKJS66	journalArticle	2022	Li, Maochen; Lou, Fuxing; Fan, Huahao	SARS-CoV-2 variant Omicron: currently the most complete "escapee" from neutralization by antibodies and vaccines	Signal Transduction and Targeted Therapy		2095-9907	10.1038/s41392-022-00880-9			2022/1/28	2022/9/20 11:15	2022/9/20 11:15		28		1	7		Signal Transduct. Target. Ther.								English							Place: London Publisher: Springernature WOS:000748257200002
EMS4BNX9	journalArticle	2022	Papagiannis, Dimitrios; Malli, Foteini; Gourgoulianis, Konstantinos I.	Registry Systems for COVID-19 Vaccines and Rate of Acceptability for Vaccination Before and After Availability of Vaccines in 12 Countries: A Narrative Review	Infectious Disease Reports			10.3390/idr14010016		Registry systems play a key role in promoting vaccination campaigns in the general population. In the present narrative review, we provide data from 12 12 countries for vaccination acceptance before the availability of COVID-19 vaccines and vaccination coverage once it is available. We selected a randomized representative sample of 12 countries from WHO regions and 194 total members by the Open E…	Feb-22	2022/9/20 11:15	2022/9/20 11:15		121-133		1	14		Infect. Dis. Rep.								English							Place: Basel Publisher: Mdpi WOS:000762841600001				covid-19; vaccines; acceptability; immunization; registry systems; state
A4VNMNNH	journalArticle	2022	Kosiorek, Piotr; Kazberuk, Dorota Elzbieta; Hryniewicz, Anna; Milewski, Robert; Stroz, Samuel; Stasiak-Barmuta, Anna	Systemic COVID-19 Vaccination Enhances the Humoral Immune Response after SARS-CoV-2 Infection: A Population Study from a Hospital in Poland Criteria for COVID-19 Reimmunization Are Needed	Vaccines			10.3390/vaccines10020334		Systemic vaccination with the BNT162b2 mRNA vaccine stimulates the humoral response. Our study aimed to compare the intensity of the humoral immune response, measured by SARS-CoV-2 IgG, SARS-CoV-2 IgM, and S-RBD-neutralizing IgG antibody levels after COVID-19 vaccination versus after SARS-CoV-2 infection. We analyzed 1060 people in the following groups: convalescents; healthy unvaccinated individ…	Feb-22	2022/9/20 11:15	2022/9/20 11:15		334		2	10		Vaccines								English							Place: Basel Publisher: Mdpi WOS:000762029100001				covid-19; SARS-CoV-2; vaccination; BNT162b2; plasma therapy; reimmunization
ASXMQ36U	journalArticle	2022	Kim, Myeongji; Poon, Kenneth K.; Miller, Nancimae; Rubio-Gomez, Heysu	A 48-Year-Old Immunocompetent Female Resident of Southern Florida with Confirmed Reinfection with P.1 (Gamma) Variant of SARS-CoV-2	American Journal of Case Reports			10.12659/AJCR.935329		Objective: Unusual clinical course Background: During the global Coronavirus Disease-2019 (COVID-19) pandemic, the Centers for Disease Control and Prevention (CDC) and the World Health Organization (WHO) have identified and monitored variants of concerns (VOCs) of severe acute respiratory syndrome coronavirus 2 (SARS-CoV-2). P.1 (Gamma) variant was initially identified in northern Brazil but has …	2022/1/18	2022/9/20 11:15	2022/9/20 11:15		e935329			23		Am. J. Case Rep.								English							Place: Melville Publisher: Int Scientific Information, Inc WOS:000745955100001				covid-19; SARS-CoV-2; anti-sars-cov-2 antibodies; COVID-19 Vaccines; Reinfection; SARS-CoV-2 Variants
BTRBYJ7A	journalArticle	2022	Rewerska-Jusko, Magdalena; Rejdak, Konrad	Social Stigma of Patients Suffering from COVID-19: Challenges for Health Care System	Healthcare			10.3390/healthcare10020292		The meaning of the term social stigma has changed over the years. The history of this concept dates back to ancient times. Currently, social stigma is defined as the attitude of discrimination, disapproval, or negative perception of a given group due to the properties and features it represents. Stigmatization concerns the physical and mental spheres of an individual. The burden of stigma affects…	Feb-22	2022/9/20 11:15	2022/9/20 11:15		292		2	10		Healthcare								English							Place: Basel Publisher: Mdpi WOS:000762731600001				covid-19; SARS-CoV-2; comorbidities; health care system; people; social stigma; stereotypes
HXV6CFXQ	journalArticle	2022	Riccio, Anna; Santopolo, Silvia; Rossi, Antonio; Piacentini, Sara; Rossignol, Jean-Francois; Santoro, M. Gabriella	Impairment of SARS-CoV-2 spike glycoprotein maturation and fusion activity by nitazoxanide: an effect independent of spike variants emergence	Cellular and Molecular Life Sciences		1420-682X	10.1007/s00018-022-04246-w		SARS-CoV-2, the causative agent of COVID-19, has caused an unprecedented global health crisis. The SARS-CoV-2 spike, a surface-anchored trimeric class-I fusion glycoprotein essential for viral entry, represents a key target for developing vaccines and therapeutics capable of blocking virus invasion. The emergence of SARS-CoV-2 spike variants that facilitate virus spread and may affect vaccine eff…	May-22	2022/9/20 11:15	2022/9/20 11:15		227		5	79		Cell. Mol. Life Sci.								English							Place: Basel Publisher: Springer Basel Ag WOS:000779754300001				covid-19; coronavirus; virus; double-blind; protein; sars; Broad-spectrum antiviral; cell entry; diarrhea; glycosylation; influenza; Nitazoxanide; prostaglandin-a; SARS-CoV-2 spike; SARS-CoV-2 variants; Syncytia formation
PSQLKRLJ	journalArticle	2022	Tlale, Lebapotswe B.; Gabaitiri, Lesego; Totolo, Lorato K.; Smith, Gomolemo; Puswane-Katse, Orapeleng; Ramonna, Eunice; Mothowaeng, Basego; Tlhakanelo, John; Masupe, Tiny; Rankgoane-Pono, Goabaone; Irige, John; Mafa, Faith; Kolane, Samuel	Acceptance rate and risk perception towards the COVID-19 vaccine in Botswana	Plos One		1932-6203	10.1371/journal.pone.0263375		Background The COVID-19 disease burden continues to be high worldwide and vaccines continue to be developed to help combat the pandemic. Acceptance and risk perception for COVID-19 vaccines is unknown in Botswana despite the government's decision to roll out the vaccine nationally. Objectives This study aims to assess the acceptance rate and risk perception of COVID-19 vaccines amongst the genera…	2022/2/4	2022/9/20 11:15	2022/9/20 11:15		e0263375		2	17		PLoS One								English							Place: San Francisco Publisher: Public Library Science WOS:000789273600034
PW267Z8F	journalArticle		Healey, Christopher G.; Simmons, Susan J.; Manivannan, Chandra; Ro, Yoonchul	Visual Analytics for the Coronavirus COVID-19 Pandemic	Big Data		2167-6461	10.1089/big.2021.0023		The coronavirus disease COVID-19 was first reported in Wuhan, China, on December 31, 2019. The disease has since spread throughout the world, affecting 227.2 million individuals and resulting in 4,672,629 deaths as of September 9, 2021, according to the Johns Hopkins University Center for Systems Science and Engineering. Numerous sources track and report information on the disease, including John…		2022/9/20 11:15	2022/9/20 11:15							Big Data								English							Place: New Rochelle Publisher: Mary Ann Liebert, Inc WOS:000747689300001				covid-19; coronavirus; epidemiology; visualization; data analytics; colors
B6RZNGGB	journalArticle	2022	Yang, Kailu; Wang, Chuchu; White, K. Ian; Pfuetzner, Richard A.; Esquivies, Luis; Brunger, Axel T.	Structural conservation among variants of the SARS-CoV-2 spike postfusion bundle	Proceedings of the National Academy of Sciences of the United States of America		0027-8424	10.1073/pnas.2119467119		Variants of severe acute respiratory syndrome coronavirus 2 (SARS-CoV-2) challenge currently available COVID-19 vaccines and monoclonal antibody therapies due to structural and dynamic changes of the viral spike glycoprotein (S). The heptad repeat 1 (HR1) and heptad repeat 2 (HR2) domains of S drive virus-host membrane fusion by assembly into a six-helix bundle, resulting in delivery of viral RNA…	2022/4/19	2022/9/20 11:15	2022/9/20 11:15		e2119467119		16	119		Proc. Natl. Acad. Sci. U. S. A.								English							Place: Washington Publisher: Natl Acad Sciences WOS:000792745500001				covid-19; SARS-CoV-2; coronavirus; inhibition; virus; protein; cryo-em structure; cryogenic electron microscopy; fusion core; hr1hr2; membrane fusion; peptide
2DHACMXF	journalArticle	2022	Dillard, Amanda J.; Lester, Jenna; Holyfield, Hope	Associations between COVID-19 risk perceptions, behavior intentions and worry	Health Psychology Report		2353-4184	10.5114/hpr.2022.114477		BACKGROUND Risk perceptions are central to health behavior, but some types of risk perceptions may be more strongly connected to behavior than others. This research examined different risk perceptions of COVID-19 and their respective associations with behavior intentions and worry. PARTICIPANTS AND PROCEDURE U.S. college students (N= 248) and general adults (N= 300) reported their risk perception…	2022	2022/9/20 11:15	2022/9/20 11:15		139-148		2	10		HEALTH PSYCHOL. REP.								English							Place: Poznan Publisher: Termedia Publishing House Ltd WOS:000782131200006				covid-19; vaccination; beliefs; health; model; barriers; behavior intentions; breast-cancer worry; decision-making; diseases; metaanalysis; risk perceptions; students; worry
GPY8GUH7	journalArticle	2022	Mose, Ayenew; Haile, Kassahun; Timerga, Abebe	COVID-19 vaccine hesitancy among medical and health science students attending Wolkite University in Ethiopia	Plos One		1932-6203	10.1371/journal.pone.0263081		Background Medical and health science students are among the frontline health care workers who are at high risk of acquiring COVID-19 infection during their clinical attachments and future career. As health care providers, they are expected to promote and administer the COVID-19 vaccine and counsel vaccine-hesitant patients. It is, therefore, imperative to assess COVID-19 vaccine hesitancy among …	2022/1/25	2022/9/20 11:15	2022/9/20 11:15		e0263081		1	17		PLoS One								English							Place: San Francisco Publisher: Public Library Science WOS:000792720400065				attitude
ACNACW7U	journalArticle	2022	Habibzadeh, Farrokh; Chumakov, Konstantin; Sajadi, Mohammad M.; Yadollahie, Mahboobeh; Stafford, Kristen; Simi, Ashraf; Kottilil, Shyamasundaran; Hafizi-Rastani, Iman; Gallo, Robert C.	Use of oral polio vaccine and the incidence of COVID-19 in the world	Plos One		1932-6203	10.1371/journal.pone.0265562		Background Several live attenuated vaccines were shown to provide temporary protection against a variety of infectious diseases through stimulation of the host innate immune system. Objective To test the hypothesis that countries using oral polio vaccine (OPV) have a lower cumulative number of cases diagnosed with COVID-19 per 100,000 population (CP100K) compared with those using only inactivated…	2022	2022/9/20 11:15	2022/9/20 11:15		e0265562		3	17		PLoS One								English							Place: San Francisco Publisher: Public Library Science WOS:000784193600089
AX697PEI	journalArticle	2022	Procianoy, Guilherme Silveira; Rossini Junior, Fabiano; Lied, Anita Faccini; Pagliaro Probst Jung, Luis Fernando; Schardosim Cotta de Souza, Maria Claudia	Impact of the COVID-19 pandemic on the vaccination of children 12 months of age and under: an ecological study	Ciencia & Saude Coletiva		1413-8123	10.1590/1413-81232022273.20082021		This study aimed to evaluate the impact of the COVID-19 pandemic on the vaccination numbers for immunization geared toward individuals under 12 months of age in Brazil. This study analyzed the numbers of the nationwide vaccination coverage of ten vaccines present in the calendar from the National Immunization Program (NIP) over the past eight years (2013-2020). This is an ecological study, and al…	Mar-22	2022/9/20 11:15	2022/9/20 11:15		969-978		3	27		Cienc. Saude Coletiva								English							Place: Rio De Janeiro Publisher: Abrasco-Assoc Brasileira Pos-Graduacao & Saude Coletiva WOS:000775556700015				risk; immunization; benefits; care; Immunization programs; Key words Vaccination coverage; measles; Physical distancing; preventable diseases
VLZRMC9Q	journalArticle		Yum, Seungil	Different Characteristics of Social Networks for COVID-19 in Europe	European Review		1062-7987	10.1017/S1062798721000284		This study sheds new light on the different characteristics of social networks for COVID-19 in European regions. This study explores six countries (the United Kingdom, Spain, Italy, Germany, France, and Sweden) by employing social network analysis for Twitter. First, this study finds that European countries show different characteristics for social networks with regard to COVID-19. For example, t…		2022/9/20 11:15	2022/9/20 11:15		PII S1062798721000284					Eur. Rev.								English							Place: Cambridge Publisher: Cambridge Univ Press WOS:000757758700001				china
WFY4UMDK	journalArticle	2022	Rathinasamy, Muthusami; Kandhasamy, Saritha	An exploratory analysis of COVID-19 vaccination administration	Proceedings of the Indian National Science Academy		0370-0046	10.1007/s43538-022-00064-7		The goal of this research is to analyze data on vaccinations, vaccination administration, and forecasting vaccination rates on a country-by-country basis for the general public, policymakers, vaccine manufacturers, national governments, and international governments to better understand the current state of COVID-19 vaccination. In this study, two public datasets were used: the Johns Hopkins Univ…	Mar-22	2022/9/20 11:15	2022/9/20 11:15		43-52		1	88		Proc. Indian Natl. Sci. Acad.								English							Place: New Delhi Publisher: Indian Nat Sci Acad WOS:000758513900001				covid-19; Public health; Coronavirus vaccinations; Forecasting vaccination rate; Infectious disease; Visual data analysis
GI6VDQAS	journalArticle	2022	Shields, Adrian M.; Venkatachalam, Srinivasan; Shafeek, Salim; Paneesha, Shankara; Ford, Mark; Sheeran, Tom; Kelly, Melanie; Qureshi, Iman; Salhan, Beena; Karim, Farheen; De Silva, Neelakshi; Stones, Jacqueline; Lee, Sophie; Khawaja, Jahanzeb; Kaudlay, Praveen Kumar; Whitmill, Richard; Kakepoto, Ghulam Nabi; Parry, Helen M.; Moss, Paul; Faustini, Sian E.; Richter, Alex G.; Drayson, Mark T.; Basu,…	SARS-CoV-2 vaccine responses following CD20-depletion treatment in patients with haematological and rheumatological disease: a West Midlands Research Consortium study	Clinical and Experimental Immunology		0009-9104	10.1093/cei/uxab018		B cell depleting drugs including rituximab are commonly used to treat haematological malignancy and autoimmune diseases but may impair the immunological response to vaccination. This study investigates SARS-CoV-2 vaccine responses in individuals with haematological and rheumatological disease with previously exposure to B cell depleting agents. Vaccination within the first 6 months of B cell depl…	2022/1/28	2022/9/20 11:15	2022/9/20 11:15		3月10日		1	207		Clin. Exp. Immunol.								English							Place: Oxford Publisher: Oxford Univ Press WOS:000777766200002				covid-19; SARS-CoV-2; bnt162b2; vaccination; therapy; antibody-responses; rituximab; CD20 depletion; haematological malignancy; rheumatoid arthritis
87NSWQGV	journalArticle	2022	Maciel, Ethel; Fernandez, Michelle; Calife, Karina; Garrett, Denise; Domingues, Carla; Kerr, Ligia; Dalcolmo, Margareth	The SARS-CoV-2 vaccination campaign in Brazil and the invisibility of science evidences	Ciencia & Saude Coletiva		1413-8123	10.1590/1413-81232022273.21822021		This paper reflects on the vaccination campaign against COVID-19 in Brazil in light of the consideration of scientific evidence in the decision-making process. Brazil has one of the lar-gest and most complete vaccination programs in the world, the National Immunization Program (Programa Nacional de Imunizacoes or PNI). Unfortunately, in the current context, with the political interference of the …	Mar-22	2022/9/20 11:15	2022/9/20 11:15		951-956		3	27		Cienc. Saude Coletiva								English							Place: Rio De Janeiro Publisher: Abrasco-Assoc Brasileira Pos-Graduacao & Saude Coletiva WOS:000775556700013				covid-19; Vaccine; &nbsp; Brazil; Vaccination campaign
MK48UD57	journalArticle		Smith, Ebony; Tran, Tuan; Gillies, Alex; Yeung, Shanna; Ma, Patrick E.	Multiple Evanescent White Dot Syndrome following COVID-19 mRNA Vaccination in Two Patients	Ocular Immunology and Inflammation		0927-3948	10.1080/09273948.2022.2032198		Purpose To describe two cases of multiple evanescent white dot syndrome (MEWDS) occurring after administration of COVID-19 vaccine. Study Design Case Report. Results Two patients presented soon after receiving their second-dose of the BNT162b2 Pfizer-BioNTech COVID-19 vaccine with findings consistent with MEWDS. Due to the significant reduction in vision, patients were treated with a short dose o…		2022/9/20 11:15	2022/9/20 11:15							Ocul. Immunol. Inflamm.								English							Place: Philadelphia Publisher: Taylor & Francis Inc WOS:000761713300001				covid-19; vaccine; mewds; non-infectious uveitis; retinal lesion
2QFDVFPQ	journalArticle	2022	Muniswamaiah, Manoj; Agerwala, Tilak; Tappert, Charles C.	A Global Survey of Technological Resources and Datasets on COVID-19	International Journal of Advanced Computer Science and Applications		2158-107X			The application and successful utilization of technological resources in developing solutions to health, safety, and economic issues caused by COVID-19 indicate the importance of technology in curbing COVID-19. Also, the medical field has had to race against tie to develop and distribute the COVID-19 vaccine. This endeavour became successful with the vaccines created and approved in less than a y…	Jan-22	2022/9/20 11:15	2022/9/20 11:15		662-687		1	13		Int. J. Adv. Comput. Sci. Appl.								English							Place: West Yorkshire Publisher: Science & Information Sai Organization Ltd WOS:000754699800001				covid-19; Vaccination; confirmed cases; data science; datasets; hospitalization
BUH9SWVR	journalArticle		Giannoccaro, Maria Pia; Vacchiano, Veria; Leone, Marta; Camilli, Federico; Zenesini, Corrado; Panzera, Ivan; Balboni, Alice; Tappata, Maria; Borghi, Annamaria; Salvi, Fabrizio; Lugaresi, Alessandra; Rinaldi, Rita; Di Felice, Giulia; Lodi, Vittorio; Lazzarotto, Tiziana; Liguori, Rocco	Difference in safety and humoral response to mRNA SARS-CoV-2 vaccines in patients with autoimmune neurological disorders: the ANCOVAX study	Journal of Neurology		0340-5354	10.1007/s00415-022-11142-7		Background Assessing the safety of SARS-CoV-2 mRNA vaccines and the effect of immunotherapies on the seroconversion rate in patients with autoimmune neurological conditions (ANC) is relevant to clinical practice. Our aim was to assess the antibody response to and safety of SARS-CoV-2 mRNA vaccines in ANC. Methods This longitudinal study included ANC patients vaccinated with two doses of BNT162b2 …		2022/9/20 11:15	2022/9/20 11:15							J. Neurol.								English							Place: Heidelberg Publisher: Springer Heidelberg WOS:000790112900003				Multiple sclerosis; Autoimmune neurological disorders; Humoral response; Immune therapy; Sars-Cov2-mRNA vaccine
DYX8R8AZ	journalArticle	2022	Bakkar, Batoul; Mohsen, Fatema; Armashi, Humam; Marrawi, Marah; Aldaher, Nizar	A cross-sectional survey of COVID-19: attitude and prevention practice among Syrians	Heliyon			10.1016/j.heliyon.2022.e09124		Introduction: Coronavirus disease of 2019 has overwhelmed public health systems worldwide and forced governments to impose draconian lockdowns on entire populations. With no vaccine or treatment during the early days of the pandemic, it is of paramount importance to assess the public's awareness about COVID-19 so that prevention-focused educational campaigns can be sufficiently deployed. This stu…	Mar-22	2022/9/20 11:15	2022/9/20 11:15		e09124		3	8		Heliyon								English							Place: Oxford Publisher: Elsevier Sci Ltd WOS:000788281900002				covid-19; knowledge; Attitude; Pandemic; Practice; Prevention; residents; scales; Syria
EWQLDYK8	journalArticle	2022	Anesi, Judith	Commentary: Effectiveness of two-dose vaccination with mRNA COVID-19 vaccines against COVID-19-associated hospitalizations among immunocompromised adults-nine states, January-September 2021	American Journal of Transplantation		1600-6135	10.1111/ajt.16910			Jan-22	2022/9/20 11:15	2022/9/20 11:15		304-305		1	22		Am. J. Transplant.								English							Place: Hoboken Publisher: Wiley WOS:000735963400036
YRL5EV46	journalArticle	2022	Toulkeridis, Theofilos; Ortiz-Prado, Esteban; Chunga-Moran, Jamileth; Heredia-R, Marco; Debut, Alexis	Excess Mortality Data Analysis of COVID-19 Infections and Fatalities in Ecuador	Uniciencia		1011-0275	10.15359/ru.36-1.17		The global COVID-19 pandemic has shocked the world. Since the virus gave rise to health problems and often ended in deaths, the count of the contagion and the deceased has been an open issue. Such statistics are vital for every nation and even every city or district and suburb as these numbers decide the level of intervention and the subsequent reduction of its given spread. Worldwide data show a…	Dec-22	2022/9/20 11:15	2022/9/20 11:15		e16275		1	36		Uniciencia								English							Place: Heredia Publisher: Univ Nacl, Fac Ciencias Exactas & Naturales WOS:000765487300002				covid-19; risk; data analysis; Ecuador; excess mortality; health crisis
LX3L4YWG	journalArticle	2022	Embi, Peter J.; Levy, Matthew E.; Naleway, Allison L.; Patel, Palak; Gaglani, Manjusha; Natarajan, Karthik; Dascomb, Kristin; Ong, Toan C.; Klein, Nicola P.; Liao, I.-Chia; Grannis, Shaun J.; Han, Jungmi; Stenehjem, Edward; Dunne, Margaret M.; Lewis, Ned; Irving, Stephanie A.; Rao, Suchitra; McEvoy, Charlene; Bozio, Catherine H.; Murthy, Kempapura; Dixon, Brian E.; Grisel, Nancy; Yang, Duck-Hye; …	Effectiveness of two-dose vaccination with mRNA COVID-19 vaccines against COVID-19-associated hospitalizations among immunocompromised adults Nine States, January-September 2021	American Journal of Transplantation		1600-6135	10.1111/ajt.16641			Jan-22	2022/9/20 11:15	2022/9/20 11:15		306-314		1	22		Am. J. Transplant.								English							Place: Hoboken Publisher: Wiley WOS:000735963400037
5UG3JHIR	journalArticle	2022	Nasab, Entezar Mehrabi; Athari, Seyyed Shamsadin	The first report of 2:1 atrioventricular block following COVID-19 vaccination	Clinical Case Reports		2050-0904	10.1002/ccr3.5797		A 65-year-old man became ill a few days after being vaccinated against the COVID-19 by the Sinopharm vaccine. Laboratory investigations, trans-thoracic echocardiography, and chest computed tomography scanning (CT-scan) retrieved normal results. The patient's electrocardiogram showed sinus rhythms with 2:1 AV-block and a narrow QRS complex. Coronary angiography showed mild coronary artery disease.	May-22	2022/9/20 11:15	2022/9/20 11:15		e05797		5	10		Clin. Case Rep.								English							Place: Hoboken Publisher: Wiley WOS:000790316000001				SARS-CoV-2; vaccine; arrhythmia; AV block
UY6DYGG3	journalArticle	2022	Dhar, Biplab; Gupta, Praveen Kumar; Sajid, Mohammad	Solution of a dynamical memory effect CoVID-19 infection system with leaky vaccination efficacy by non-singular kernel fractional derivatives	Mathematical Biosciences and Engineering		1547-1063	10.3934/mbe.2022201		In this paper, the recent trends of CoVID-19 infection spread have been studied to explore the advantages of leaky vaccination dynamics in SEVR (Susceptible Effected Vaccinated Recovered) compartmental model with the help of Caputo-Fabrizio (CF) and Atangana-Baleanu derivative in the Caputo sense (ABC) non-singular kernel fractional derivative operators with memory effect within the model to show…	2022	2022/9/20 11:15	2022/9/20 11:15		4341-4367		5	19		Math. Biosci. Eng.								English							Place: Springfield Publisher: Amer Inst Mathematical Sciences-Aims WOS:000767365400001				vaccines; transmission; Banach fixed-point theorem; basic reproduction number; epidemic model; non-singular kernel fractional derivative; stability analysis; vaccine e ffi cacy
79RY6HZ3	journalArticle	2022	Cao, Zhujun; Zhang, Chenxi; Zhao, Shuang; Sheng, Zike; Xiang, Xiaogang; Li, Ruokun; Qian, Zhuping; Wang, Yinling; Chen, Bin; Li, Ziqiang; Liu, Yuhan; An, Baoyan; Zhou, Huijuan; Cai, Wei; Wang, Hui; Gui, Honglian; Xin, Haiguang; Xie, Qing	COVID-19 vaccines in patients with decompensated cirrhosis: a retrospective cohort on safety data and risk factors associated with unvaccinated status	Infectious Diseases of Poverty		2095-5162	10.1186/s40249-022-00982-0		Background: Safety data reported from the large-scale clinical trials of the coronavirus disease 2019 (COVID-19) vaccine are extremely limited in patients with decompensated cirrhosis. The vaccination campaign in this specific population could be difficult due to uncertainty about the adverse events following vaccination. We aimed to assessed the COVID-19 vaccination rate, factors associated with…	2022/5/16	2022/9/20 11:15	2022/9/20 11:15		56		1	11		Infect. Dis. Poverty								English							Place: London Publisher: Bmc WOS:000796497600001				covid-19; SARS-CoV-2; infection; Vaccine; Acute-on-chronic liver failure; Decompensated cirrhosis; Liver transplantation; liver-disease; sars-cov-2 vaccination
I2Y57RX2	journalArticle		Goldberg, Richard	Vaccine damage schemes in the US and UK reappraised: making them fit for purpose in the light of Covid-19	Legal Studies		0261-3875	10.1017/lst.2022.9		Vaccines have continued to play a crucial global role in preventing infectious diseases in the twenty-first century. The Covid-19 pandemic has underlined their importance, with vaccines seen as the best way to protect the public from coronavirus. A longstanding problem of governments has been the extent to which they should assume responsibility for the compensation of those injured by vaccines. …		2022/9/20 11:15	2022/9/20 11:15		PII S0261387522000095					Leg. Stud.								English							Place: Cambridge Publisher: Cambridge Univ Press WOS:000765137200001				united-states; vaccines; Covid-19; compensation; medicinal products; product liability; program; tort
7F3QKZJQ	journalArticle	2022	Li, Zhiwei; Ma, Zhiqian; Dong, Linfang; Yang, Ting; Li, Yang; Jiao, Dian; Han, Weiguo; Zheng, Haixue; Xiao, Shuqi	Molecular Mechanism of Porcine Epidemic Diarrhea Virus Cell Tropism	Mbio		2150-7511	10.1128/mbio.03739-21		CoVs can spill from an animal reservoir into a naive host to cause diseases in humans or domestic animals. PEDV results in high mortality in piglets, which has caused immense economic losses in the pork industry. In the 21st century, several human and swine coronaviruses (CoVs) have emerged suddenly and caused great damage to people's lives and property. The porcine epidemic diarrhea virus (PEDV)…	2022/4/26	2022/9/20 11:15	2022/9/20 11:15		e03739-21		2	13		mBio								English							Place: Washington Publisher: Amer Soc Microbiology WOS:000788061200038				coronavirus; spike; entry; receptor; cellular tropism; degradation; porcine epidemic diarrhea virus; promotes; replication; reverse genetic analysis; suppression
AVS3E32D	journalArticle	2022	Yetmar, Zachary A.; Bhaimia, Eric; Bierle, Dennis M.; Ganesh, Ravindra; Razonable, Raymund R.	Breakthrough COVID-19 after SARS-CoV-2 vaccination in solid organ transplant recipients: An analysis of symptomatic cases and monoclonal antibody therapy	Transplant Infectious Disease		1398-2273	10.1111/tid.13779		Background Solid organ transplant (SOT) recipients are at increased risk for complications from SARS-CoV-2 infection. Little is known regarding clinical course and outcomes of breakthrough COVID-19 in the fully vaccinated SOT population. We sought to describe our cohort of SOT recipients who developed symptomatic breakthrough COVID-19 after full vaccination. Methods We conducted a retrospective r…	Apr-22	2022/9/20 11:15	2022/9/20 11:15		e13779		2	24		Transpl. Infect. Dis.								English							Place: Hoboken Publisher: Wiley WOS:000748654100001				covid-19; SARS-CoV-2; breakthrough infection; casirivimab-imdevimab; monoclonal antibody therapy; organ transplantation
USBF7H4C	journalArticle		Lama, Yuki; Budenz, Alex; Gaysynsky, Anna; Iles, Irina A.; Chou, Wen-Ying Sylvia	Factors Associated With COVID-19 Behavioral Intentions: Findings From an Online Survey	American Journal of Health Promotion		0890-1171	10.1177/08901171221093036		Purpose The COVID-19 pandemic provides a novel context through which to evaluate salient factors for promoting behavioral change. We examined how attitudes, perceived community behaviors, and prior related behaviors predict intentions to (1) receive COVID-19 vaccination and (2) practice social distancing. Design Cross-sectional online survey administered through Amazon's Mechanical Turk in Septem…		2022/9/20 11:15	2022/9/20 11:15		8.90117E+15					Am. J. Health Promot.								English							Place: Thousand Oaks Publisher: Sage Publications Inc WOS:000786623900001				social distancing; vaccine acceptance; COVID-19 vaccination; communication; health communication
PG66A3T8	journalArticle	2022	Zeng, Jianxiong; Xie, Xiaochun; Feng, Xiao-Li; Xu, Ling; Han, Jian-Bao; Yu, Dandan; Zou, Qing-Cui; Liu, Qianjin; Li, Xiaohong; Ma, Guanqin; Li, Ming-Hua; Yao, Yong-Gang	<p>Specific inhibition of the NLRP3 inflammasome suppresses immune overactivation and alleviates COVID-19 like pathology in mice</p>	Ebiomedicine		2352-3964	10.1016/j.ebiom.2021.103803		Background The Coronavirus Disease 2019 (COVID-19) pandemic has been a great threat to global public health since 2020. Although the advance on vaccine development has been largely achieved, a strategy to alleviate immune overactivation in severe COVID-19 patients is still needed. The NLRP3 inflammasome is activated upon SARS-CoV-2 infection and associated with COVID-19 severity. However, the pro…	Jan-22	2022/9/20 11:15	2022/9/20 11:15		103803			75		EBioMedicine								English							Place: Amsterdam Publisher: Elsevier WOS:000792487700014				SARS-CoV-2; coronavirus; pneumonia; activation; cytokine storm; Cytokine storm; Immune overactivation; mcc950; NLRP3 inflammasome
EBAFG6DA	journalArticle	2022	Gupta, B. M.; Ahmed, K. K. Mueen	COVID-2019 Vaccine A Scientometric Assessment of Global Publications during 2020	Journal of Young Pharmacists		0975-1483	10.5530/jyp.2022.14.8		Objectives: The study presents a bibliometric assessment of COVID-19 vaccine research publications to understand the current and up-to-date scenario of COVID-19 vaccine research and to track important research players and identify the current areas. Materials and Methods: The global literature on COVID-19 vaccine research published during 2020 were searched in the Scopus database, using the keywo…	Mar-22	2022/9/20 11:15	2022/9/20 11:15		37-45		1	14		J. Young Pharm.								English							Place: Bangelore Publisher: Inpharm Assoc, Phcog Net WOS:000754731900005				covid-19; Vaccine; Bibliometrics; Global publications; Scientometrics
ZQUHETZ4	journalArticle	2022	Gravelle, Timothy B.; Phillips, Joseph B.; Reifler, Jason; Scotto, Thomas J.	Estimating the size of "anti-vax" and vaccine hesitant populations in the US, UK, and Canada: comparative latent class modeling of vaccine attitudes	Human Vaccines & Immunotherapeutics		2164-5515	10.1080/21645515.2021.2008214		Vaccine hesitancy is a significant impediment to global efforts to vaccinate against the SARS-CoV-2 virus at levels that generate herd immunity. In this article, we show the utility of an inductive approach - latent class analysis (LCA) - that allows us to characterize the size and nature of different vaccine attitude groups; and to compare how these groups differ across countries as well as acro…	2022/12/31	2022/9/20 11:15	2022/9/20 11:15				1	18		Human Vaccines Immunother.								English							Place: Philadelphia Publisher: Taylor & Francis Inc WOS:000774827100001				covid; coronavirus; vaccines; vaccine hesitancy; anti-vax; latent class modeling
ACXUWJCI	journalArticle	2022	Piccini, Barbara; Pessina, Benedetta; Pezzoli, Francesco; Casalini, Emilio; Toni, Sonia	COVID-19 vaccination in adolescents and young adults with type 1 diabetes: Glycemic control and side effects	Pediatric Diabetes		1399-543X	10.1111/pedi.13326		Background Two vaccines against SARS-CoV-2 are approved by the World Health Organization (WHO) for minors aged 12 years and over. Currently, people with both type 1 diabetes (T1D) and type 2 diabetes (T2D) are prioritized for vaccination. Objective To evaluate possible glycemic control modification, insulin dose adjustment and adverse effects after COVID-19 vaccination in young T1D individuals, u…	Jun-22	2022/9/20 11:15	2022/9/20 11:15		469-472		4	23		Pediatr. Diabetes								English							Place: Hoboken Publisher: Wiley WOS:000763129000001				children; advanced hybrid closed loop; COVID 19 vaccination; metabolic control; type 1 diabetes
62J3XLKW	journalArticle	2022	Moncunill, Gemma; Aguilar, Ruth; Ribes, Marta; Ortega, Natalia; Rubio, Rocio; Salmeron, Gemma; Jose Molina, Maria; Vidal, Marta; Barrios, Diana; Mitchell, Robert A.; Jimenez, Alfons; Castellana, Cristina; Hernandez-Luis, Pablo; Rodo, Pau; Mendez, Susana; Llupia, Anna; Puyol, Laura; Rodrigo Melero, Natalia; Carolis, Carlo; Mayor, Alfredo; Izquierdo, Luis; Varela, Pilar; Trilla, Antoni; Vilella, An…	Determinants of early antibody responses to COVID-19 mRNA vaccines in a cohort of exposed and naive healthcare workers	Ebiomedicine		2352-3964	10.1016/j.ebiom.2021.103805		Background Two doses of mRNA vaccination have shown >94% efficacy at preventing COVID-19 mostly in naive adults, but it is not clear if the second dose is needed to maximize effectiveness in those previously exposed to SARS-CoV-2 and what other factors affect responsiveness. Methods We measured IgA, IgG and IgM levels against SARS-CoV-2 spike (S) and nucleocapsid (N) antigens from the wild-type a…	Jan-22	2022/9/20 11:15	2022/9/20 11:15		103805			75		EBioMedicine								English							Place: Amsterdam Publisher: Elsevier WOS:000792487700018				covid-19; SARS-CoV-2; mRNA vaccines; Antibody; Avidity; Health care workers; Neutralization
WUY77A5B	journalArticle	2022	Cicalese, Maria Pia; Ferrua, Francesca; Barzaghi, Federica; Cerri, Federica; Moro, Matteo; Aiuti, Alessandro; Silvani, Paolo	Third cranial nerve palsy in an 88-year-old man after SARS-CoV-2 mRNA vaccination: change of injection site and type of vaccine resulted in an uneventful second dose with humoral immune response	Bmj Case Reports			10.1136/bcr-2021-246485		Vaccines for SARS-CoV-2 currently authorised by the European Medicine Agency are effective, safe and well tolerated in practice. Awareness of rare potential vaccine-related adverse effects (AEs) is important to improve their recognition, management and reporting. An 88-year-old man attended the emergency department with incomplete palsy of the right third cranial nerve 3 days after the first admi…	Feb-22	2022/9/20 11:15	2022/9/20 11:15		e246485		2	15		BMJ Case Rep.								English							Place: London Publisher: Bmj Publishing Group WOS:000753989600088				covid-19; vaccination; adverse reactions; cranial nerves; immunisation; peripheral nerve disease; unwanted effects
IYZQ44FE	journalArticle		Gillman, Arielle S.; Scharnetzki, Liz; Boyd, Patrick; Ferrer, Rebecca A.; Klein, William M. P.; Han, Paul K. J.	Perceptions and tolerance of uncertainty: relationship to trust in COVID-19 health information and vaccine hesitancy	Journal of Behavioral Medicine		0160-7715	10.1007/s10865-022-00302-9		The COVID-19 crisis has exposed the public to considerable scientific uncertainty, which may promote vaccine hesitancy among individuals with lower tolerance of uncertainty. In a national sample of US adults in May-June 2020, we examined how both perceptions of uncertainty about COVID-19 and trait-level differences in tolerance of uncertainty arising from various sources (risk, ambiguity, and com…		2022/9/20 11:15	2022/9/20 11:15							J. Behav. Med.								English							Place: New York Publisher: Springer/Plenum Publishers WOS:000781257700003				covid-19; risk; intentions; attitudes; Ambiguity; aversion; decisions; individual-differences; medical tests; need; perceived ambiguity; Trust; Uncertainty; Uncertainty tolerance; Vaccine hesitancy
EL38FLYB	journalArticle		Mukherjee, Subhodeep; Venkataiah, Chittipaka; Baral, Manish Mohan; Pal, Surya Kant	Analyzing the factors that will impact the supply chain of the COVID-19 vaccine : A structural equation modeling approach	Journal of Statistics and Management Systems		0972-0510	10.1080/09720510.2021.1966955		The vaccine helps in providing immunity against any disease to individuals. The pandemic has created mass destruction by taking many human lives. Lack of proper medicines and unavailability of the vaccine made the pandemic more dangerous. Many countries have launched the vaccine, but questions arise in its distribution and supply chain. Developing countries with a large population and lack of hea…		2022/9/20 11:15	2022/9/20 11:15							J. Stat. Manag. Syst.								English							Place: Abingdon Publisher: Taylor & Francis Ltd WOS:000779324000001				covid-19; Vaccine; challenges; Exploratory factor analysis; Structural equation modeling; system; Vaccine supply chain
NRNBXXRI	journalArticle		Goh, Zhang Hao; Tandoc, Edson C.; Salmon, Charles Thomas; Kim, Hye Kyung; Shi, Jingyuan	Can Press Freedom Enhance the Effect of News Exposure on COVID-19 Health Beliefs? A Health Belief Model Perspective	Health Communication		1041-0236	10.1080/10410236.2022.2056981		News media can influence citizens' health beliefs about COVID-19 and eventually their vaccination intention. However, existing literature has rarely investigated how such effect is contingent upon a country-level factor: press freedom. Situated in the Health Belief Model, this study draws upon a multi-national survey (N = 3,599), involving 10 major cities in Asia to address the research gap. Resu…		2022/9/20 11:15	2022/9/20 11:15							Health Commun.								English							Place: Abingdon Publisher: Routledge Journals, Taylor & Francis Ltd WOS:000778823400001				cues; information; media; roles
SGIJJQPL	journalArticle	2022	Wiens, Kirsten E.; Smith, Claire P.; Badillo-Goicoechea, Elena; Grantz, Kyra H.; Grabowski, M. Kate; Azman, Andrew S.; Stuart, Elizabeth A.; Lessler, Justin	In-person schooling and associated COVID-19 risk in the United States over spring semester 2021	Science Advances		2375-2548	10.1126/sciadv.abm9128		Because of the importance of schools to childhood development, the relationship between in-person schooling and COVID-19 risk has been one of the most important questions of this pandemic. Previous work in the United States during winter 2020-2021 showed that in-person schooling carried some risk for household members and that mitigation measures reduced this risk. Schooling and the COVID-19 land…	Apr-22	2022/9/20 11:15	2022/9/20 11:15		eahm9128		16	8		Sci. Adv.								English							Place: Washington Publisher: Amer Assoc Advancement Science WOS:000786214100032				sars-cov-2 infection; county; transmission; outbreaks; clusters; elementary-school; utah
R9RAE4XA	journalArticle	2022	Magliulo, Daniel; Wade, Stefanie D.; Kyttaris, Vasileios C.	Immunogenicity of SARS-CoV-2 vaccination in rituximab-treated patients: Effect of timing and immunologic parameters	Clinical Immunology		1521-6616	10.1016/j.clim.2021.108897		Rituximab (RTX), an important therapeutic option for patients with rheumatic diseases, has been shown to reduce immune responses to various vaccines. We asked whether following SARS-CoV-2 vaccination, response rates in RTX treated patients are reduced and whether specific patient characteristics influence the responses. We recruited patients on chronic RTX therapy undergoing anti-SARS-CoV2 vaccin…	Jan-22	2022/9/20 11:15	2022/9/20 11:15		108897			234		Clin. Immunol.								English							Place: San Diego Publisher: Academic Press Inc Elsevier Science WOS:000784326300013				covid-19; Vaccination; Autoimmune diseases; B cells; Rituximab
8F5E339P	journalArticle	2022	Garcia-Rios, Estefani; Leivas, Alejandra; Mancebo, Francisco J.; Sanchez-Vega, Laura; Lanzarot, Diego; Maria Aguado, Jose; Martinez-Lopez, Joaquin; Liz Paciello, Maria; Perez-Romero, Pilar	Isolation of Functional SARS-CoV-2 Antigen-Specific T-Cells with Specific Viral Cytotoxic Activity for Adoptive Therapy of COVID-19	Biomedicines			10.3390/biomedicines10030630		In order to demonstrate the feasibility of preparing clinical-grade SARS-CoV-2-specific T-cells from convalescent donors and the ability of these cells to neutralize the virus in vitro, we used blood collected from two COVID-19 convalescent donors (before and after vaccination) that was stimulated with specific SARS-CoV-2 peptides followed by automated T-cell isolation using the CliniMacs Prodigy…	Mar-22	2022/9/20 11:15	2022/9/20 11:15		630		3	10		Biomedicines								English							Place: Basel Publisher: Mdpi WOS:000775764500001				SARS-CoV-2; responses; children; infections; system; ccs; cd4(+); cmv; cytotoxicity; donors; generation; hsct; M protein; T-lymphocytes
2HX65IV7	journalArticle	2022	Qabool, Hafsa; Hamid, Fatima; Sukhia, Rashna Hoshang	Acceptance of SARS-CoV-2 vaccination and the associated factors among dental health care professionals: A cross-sectional survey	Dental and Medical Problems		1644-387X	10.17219/dmp/145491		Background. One of the greatest inventions of the 21st century is the development of vaccines against the life-threatening pandemic of coronavirus disease 2019 (COVID-19) caused by severe acute respiratory syndrome coronavirus 2 (SARS-CoV-2). Whenever a new medication or treatment modality is introduced globally, it is accompanied by anxiety in the general public and among health care professiona…	Mar-22	2022/9/20 11:15	2022/9/20 11:15		21-26		1	59		Dent. Med. Probl.								English							Place: Wroclaw Publisher: Wroclaw Medical Univ WOS:000754369800001				covid-19; SARS-CoV-2; vaccine; acceptance; dentist; health care professional
HCEEFUB2	journalArticle		Byun, Malia; Feller, Hollie; Ferrie, Monica; Best, Stephanie	Living with a genetic, undiagnosed or rare disease: A longitudinal journalling study through the COVID-19 pandemic	Health Expectations		1369-6513	10.1111/hex.13405		Introduction COVID-19 changed the way we lived with uncertainty from the outset as the pandemic impacted every aspect of our lives from well-being, socializing to accessing healthcare. For people in vulnerable populations, such as those with genetic, undiagnosed and rare disorders, the experience was heightened. Aim The aim of this study was to identify how the rapidly changing COVID-19 environme…		2022/9/20 11:15	2022/9/20 11:15							Health Expect.								English							Place: Hoboken Publisher: Wiley WOS:000751298000001				covid-19; health; chronic illness; diary; genetics; journalling; lived experience; rare disease; resilience; scale
GEW2T9YI	journalArticle		Coffeng, Luc E.; de Vlas, Sake J.	Predicting epidemics and the impact of interventions in heterogeneous settings: Standard SEIR models are too pessimistic	Journal of the Royal Statistical Society Series a-Statistics in Society		0964-1998	10.1111/rssa.12854		The basic reproduction number (R-0) is an established concept to describe the potential for an infectious disease to cause an epidemic and to derive estimates of the required effect of interventions for successful control. Calculating R-0 from simple deterministic transmission models may result in biased estimates when important sources of heterogeneity related to transmission and control are ign…		2022/9/20 11:15	2022/9/20 11:15							J. R. Stat. Soc. Ser. A-Stat. Soc.								English							Place: Hoboken Publisher: Wiley WOS:000791393900001				assortative mixing; basic reproduction number; estimation; heterogeneity; infectious disease modelling
PMHLHZ4R	journalArticle	2022	Parry, Helen; Bruton, Rachel; Stephens, Christine; Bentley, Christopher; Brown, Kevin; Amirthalingam, Gayatri; Hallis, Bassam; Otter, Ashley; Zuo, Jianmin; Moss, Paul	Extended interval BNT162b2 vaccination enhances peak antibody generation	Npj Vaccines			10.1038/s41541-022-00432-w		The BNT162b2 vaccine is highly effective against COVID-19 infection and was delivered with a 3-week time interval in registration studies(1). However, many countries extended this interval to accelerate population coverage with a single vaccine. It is not known how immune responses are influenced by delaying the second dose. We provide the assessment of immune responses in the first 14 weeks afte…	2022/1/27	2022/9/20 11:15	2022/9/20 11:15		14		1	7		npj Vaccines								English							Place: Berlin Publisher: Nature Portfolio WOS:000748705200002				immunogenicity; chadox1 ncov-19
PWK5RKYS	journalArticle	2022	Cristiano, Antonio; Pieri, Massimo; Sarubbi, Serena; Pelagalli, Martina; Calugi, Graziella; Tomassetti, Flaminia; Bernardini, Sergio; Nuccetelli, Marzia	Evaluation of serological anti-SARS-CoV-2 chemiluminescent immunoassays correlated to live virus neutralization test, for the detection of anti-RBD antibodies as a relevant alternative in COVID-19 large-scale neutralizing activity monitoring	Clinical Immunology		1521-6616	10.1016/j.clim.2021.108918		The Spike-Receptor Binding Domain (S-RBD) is considered the most antigenic protein in SARS-CoV-2 and probably the key player in SARS-CoV-2 immune response. Quantitative immunoassays may help establish an anti-RBD Abs threshold as an indication of protective immunity. Since different immunoassays are commercial, the standard reference method for the neutralizing activity is the live Virus Neutrali…	Jan-22	2022/9/20 11:15	2022/9/20 11:15		108918			234		Clin. Immunol.								English							Place: San Diego Publisher: Academic Press Inc Elsevier Science WOS:000784326300018				covid-19; SARS-CoV-2; Anti-SARS-CoV-2 antibodies; Live virus neutralization test; Serological immunoassays
G8MMCW7H	journalArticle		Perea, Sofia; Tretina, Kyle; O'Donnell, Kirk N.; Love, Rebecca; Bethlendy, Gabor; Wirtz, Michael; Hidalgo, Manuel	Saliva-Based, COVID-19 RT-PCR Pooled Screening Strategy to Keep Schools Open	Disaster Medicine and Public Health Preparedness		1935-7893	10.1017/dmp.2021.337		Background: As of March 2020, governments throughout the world implemented business closures, work from home policies, and school closures due to exponential increase of coronavirus disease 2019 (COVID-19) cases, leaving only essential workers being able to work on site. For most of the children and adolescent school closures during the first lockdown had significant physical and psychosocial con…		2022/9/20 11:15	2022/9/20 11:15		PII S1935789321003372					Dis. Med. Public Health Prep.								English							Place: New York Publisher: Cambridge Univ Press WOS:000742538900001				covid-19; transmission; Pooled testing; Public Health Surveillance; rt-pcr; saliva
YJTCMVEJ	journalArticle	2022	Lau, Chin Shern; Phua, Soon Kieng; Liang, Ya Li; Oh, May Lin Helen; Aw, Tar Choon	SARS-CoV-2 Spike and Neutralizing Antibody Kinetics 90 Days after Three Doses of BNT162b2 mRNA COVID-19 Vaccine in Singapore	Vaccines			10.3390/vaccines10020331		Background: We evaluated the post-booster (BNT162b2) antibody responses in Singapore. Methods: Participants (n = 43) were tested pre-booster and 20/30/60/90 days post-booster. Participants were boosted 120-240 days (mean 214 days) after their second dose and had no history or serologic evidence of prior COVID-19 infection; all participants had undetectable SARS-CoV-2 nucleocapsid antibodies throu…	Feb-22	2022/9/20 11:15	2022/9/20 11:15		331		2	10		Vaccines								English							Place: Basel Publisher: Mdpi WOS:000762082300001				SARS-CoV-2; antibodies; booster vaccination
HEUVUK2G	journalArticle	2022	Ribeiro, Maria Ines; Pimenta, Ines; Conde, Ines; Gonzalez, Filipe Andre	Vaccine-induced immune thrombocytopaenia and thrombosis (VITT) after COVID-19 vaccination	Bmj Case Reports			10.1136/bcr-2021-247346		COVID-19 represents a global health emergency, causing significant morbidity and mortality. Multiple vaccines have been distributed worldwide to control the spread of this pandemic. Several reports of thrombosis and thrombocytopaenia have been described after vaccination. These have been termed vaccine-induced immune thrombocytopaenia and thrombosis (VITT). We report a fatal case of VITT after re…	May-22	2022/9/20 11:15	2022/9/20 11:15		e247346		5	15		BMJ Case Rep.								English							Place: London Publisher: Bmj Publishing Group WOS:000798758200007				covid-19; adverse reactions; Adult intensive care; Immunological products and vaccines; Unwanted effects
L6MZ8BA8	journalArticle	2022	Li, Lingyao; Zhou, Jiayan; Ma, Zihui; Bensi, Michelle T.; Hall, Molly A.; Baecher, Gregory B.	<p>Dynamic assessment of the COVID-19 vaccine acceptance leveraging social media data</p>	Journal of Biomedical Informatics		1532-0464	10.1016/j.jbi.2022.104054		Vaccination is the most effective way to provide long-lasting immunity against viral infection; thus, rapid assessment of vaccine acceptance is a pressing challenge for health authorities. Prior studies have applied survey techniques to investigate vaccine acceptance, but these may be slow and expensive. This study investigates 29 million vaccine-related tweets from August 8, 2020 to April 19, 20…	May-22	2022/9/20 11:15	2022/9/20 11:15		104054			129		J. Biomed. Inform.								English							Place: San Diego Publisher: Academic Press Inc Elsevier Science WOS:000788753600001				COVID-19 vaccine; hesitancy; confidence scale; Natural language processing; parents; sentiment; Social media; Text classification; Vaccine acceptance
G6PF3SMF	journalArticle	2022	Pettini, Elena; Ciabattini, Annalisa; Pastore, Gabiria; Polvere, Jacopo; Lucchesi, Simone; Fiorino, Fabio; Montagnani, Francesca; Bucalossi, Alessandro; Tozzi, Monica; Marotta, Giuseppe; Medaglini, Donata	A third dose of mRNA-1273 vaccine improves SARS-CoV-2 immunity in HCT recipients with low antibody response after 2 doses	Blood Advances		2473-9529	10.1182/bloodadvances.2021006599		Patients with hematologic malignancies treated with autologous (auto) and allogeneic (allo) hematopoietic cell transplantation (HCT) are at high risk of developing adverse outcomes related to severe acute respiratory syndrome coronavirus 2 (SARS-CoV-2) infection due to immune dysregulation, prolonged immunosuppression, graft-versus-host disease (GVHD), and cytopenias.1 The estimated incidence of …	2022/4/12	2022/9/20 11:15	2022/9/20 11:15		2247-2249		7	6		Blood Adv.								English							Place: Amsterdam Publisher: Elsevier WOS:000792426300008
YLFKCDED	journalArticle	2022	Jose Rodriguez-Sevilla, Juan; Guerri-Fernadez, Roberto; Bertran Recasens, Bernat	Is There Less Alteration of Smell Sensation in Patients With Omicron SARS-CoV-2 Variant Infection?	Frontiers in Medicine			10.3389/fmed.2022.852998		The ongoing pandemic Coronavirus Disease 2019 (COVID-19) caused by the severe acute respiratory syndrome coronavirus 2 (SARS-CoV-2) is a matter of global concern in terms of public health Within the symptoms secondary to SARS-CoV-2 infection, hyposmia and anosmia have emerged as characteristic symptoms during the onset of the pandemic. Although many researchers have investigated the etiopathogene…	2022/4/12	2022/9/20 11:15	2022/9/20 11:15		852998			9		Front. Med.								English							Place: Lausanne Publisher: Frontiers Media Sa WOS:000787892000001				covid-19; inflammation; vaccines; model; anosmia; dysfunction; interleukin-6 il-6; Omicron variant; taste
2DID8PDG	journalArticle	2022	Herrman, Emma; Ghimire, Bipin; Chisti, Mohammad Muhsin	Thrombotic thrombocytopenic purpura following administration of the Moderna booster vaccine	Bmj Case Reports			10.1136/bcr-2021-247576		Thrombotic thrombocytopenic purpura (TTP) is a type of thrombotic microangiopathy that is characterized by microangiopathic haemolytic anaemia, consumption thrombocytopenia and organ injury. It is caused by a severe deficiency of ADAMTS13, which can be either congenital or acquired. There is a plethora of things that can cause the acquired form, including medications and infections. Vaccines have…	Mar-22	2022/9/20 11:15	2022/9/20 11:15		e247576		3	15		BMJ Case Rep.								English							Place: London Publisher: Bmj Publishing Group WOS:000773594500012				covid-19; haematology (incl blood transfusion); immunological products and vaccines; malignant and benign haematology; ttp
AH7FF8AU	journalArticle	2022	Levy, Yinon; Alcalay, Ron; Zvi, Anat; Makdasi, Efi; Peretz, Eldar; Noy-Porat, Tal; Chitlaru, Theodor; Mandelboim, Michal; Mazor, Ohad; Rosenfeld, Ronit	Immunodominant Linear B-Cell Epitopes of SARS-CoV-2 Spike, Identified by Sera from K18-hACE2 Mice Infected with the WT or Variant Viruses	Vaccines			10.3390/vaccines10020251		SARS-CoV-2 surface spike protein mediates the viral entry into the host cell and represents the primary immunological target of COVID-19 vaccines as well as post-exposure immunotherapy. Establishment of the highly immunogenic B-cell epitope profile of SARS-CoV-2 proteins in general, and that of the spike protein in particular, may contribute to the development of sensitive diagnostic tools and id…	Feb-22	2022/9/20 11:15	2022/9/20 11:15		251		2	10		Vaccines								English							Place: Basel Publisher: Mdpi WOS:000762213200001				covid-19; SARS-CoV-2; binding; epitope mapping; K18-hACE2; linear epitopes
NM56TXYA	journalArticle	2022	Markosian, Christopher; Staquicini, Daniela; Dogra, Prashant; Dodero-Rojas, Esteban; Lubin, Joseph H.; Tang, Fenny H. F.; Smith, Tracey L.; Contessoto, Vinicius G.; Libutti, Steven K.; Wang, Zhihui; Cristini, Vittorio; Khare, Sagar D.; Whitford, Paul C.; Burley, Stephen K.; Onuchic, Jose N.; Pasqualini, Renata; Arap, Wadih	Genetic and Structural Analysis of SARS-CoV-2 Spike Protein for Universal Epitope Selection	Molecular Biology and Evolution		0737-4038	10.1093/molbev/msac091		Evaluation of immunogenic epitopes for universal vaccine development in the face of ongoing SARS-CoV-2 evolution remains a challenge. Herein, we investigate the genetic and structural conservation of an immunogenically relevant epitope (C662-C671) of spike (S) protein across SARS-CoV-2 variants to determine its potential utility as a broad-spectrum vaccine candidate against coronavirus diseases. …	2022/5/3	2022/9/20 11:15	2022/9/20 11:15		msac091		5	39		Mol. Biol. Evol.								English							Place: Oxford Publisher: Oxford Univ Press WOS:000799969900002				covid-19; epitope; variants
GBAYCP98	journalArticle	2022	Dick, David W.; Childs, Lauren; Feng, Zhilan; Li, Jing; Roest, Gergely; Buckeridge, David L.; Ogden, Nick H.; Heffernan, Jane M.	COVID-19 Seroprevalence in Canada Modelling Waning and Boosting COVID-19 Immunity in Canada a Canadian Immunization Research Network Study	Vaccines			10.3390/vaccines10010017		COVID-19 seroprevalence changes over time, with infection, vaccination, and waning immunity. Seroprevalence estimates are needed to determine when increased COVID-19 vaccination coverage is needed, and when booster doses should be considered, to reduce the spread and disease severity of COVID-19 infection. We use an age-structured model including infection, vaccination and waning immunity to esti…	Jan-22	2022/9/20 11:15	2022/9/20 11:15		17		1	10		Vaccines								English							Place: Basel Publisher: Mdpi WOS:000758899900001				covid-19; seroprevalence; vaccine; outbreaks; heterogeneity; infectious disease modelling; mathematical epidmiology; population-models
4ESLTGUZ	journalArticle	2022	Utzet, Mireia; Benavides, Fernando G.; Villar, Rocio; Buron, Andrea; Sala, Maria; Lopez, Luis-Eugenio; Gomar, Pau; Castells, Xavier; Diaz, Pilar; Maria Ramada, Jose; Serra, Consol	Non-Pharmacological Preventive Measures Had an Impact on COVID-19 in Healthcare Workers before the Vaccination Effect: A Cohort Study	International Journal of Environmental Research and Public Health			10.3390/ijerph19063628		Healthcare workers have been and still are at the forefront of COVID-19 patient care. Their infection had direct implications and caused important challenges for healthcare performance. The aim of this study is to assess the impact of non-pharmacological preventive measures against COVID-19 among healthcare workers. This study is based on a dynamic cohort of healthcare workers (n = 5543) who had …	Mar-22	2022/9/20 11:15	2022/9/20 11:15		3628		6	19		Int. J. Environ. Res. Public Health								English							Place: Basel Publisher: Mdpi WOS:000775387700001				covid-19; seroprevalence; healthcare worker; incidence; non-pharmaceutical preventive measures; rate ratio; sars-cov-2 antibodies
KF822UF3	journalArticle	2022	Eggers, Maren; Jungke, Peggy; Wolkinger, Volker; Bauer, Rudolf; Kessler, Uwe; Frank, Bruno	Antiviral activity of plant juices and green tea against SARS-CoV-2 and influenza virus	Phytotherapy Research		0951-418X	10.1002/ptr.7431		Respiratory viruses pose a significant threat to global health. They initially infect the naso- and oropharyngeal regions, where they amplify, cause symptoms, and may also be transmitted to new hosts. Preventing initial infection or reducing viral loads upon infection might soothe symptoms, prevent dissemination into the lower airways, or transmission to the next individual. Several natural produ…	May-22	2022/9/20 11:15	2022/9/20 11:15		2109-2115		5	36		Phytother. Res.								English							Place: Hoboken Publisher: Wiley WOS:000762257700001				covid-19; efficacy; black chokeberry (Aronia melanocarpae); elderberry (Sambucus nigra); oral rinses; pomegranate (Punica granatum); virus transmission
YHIX3PDX	journalArticle	2022	Wang, Hai-xin; Zhang, Li; Liang, Zi-teng; Nie, Jian-hui; Wu, Jia-jing; Li, Qian-qian; Ding, Ru-xia; Zhang, Yue; Chen, Guo-qing; Wang, You-chun; Wang, Hui-guo; Huang, Wei-jin	Infectivity and antigenicity of pseudoviruses with high-frequency mutations of SARS-CoV-2 identified in Portugal	Archives of Virology		0304-8608	10.1007/s00705-021-05327-0		Severe acute respiratory syndrome coronavirus 2 (SARS-CoV-2) has had a major impact on global human health. During the spread of SARS-CoV-2, weakened host immunity and the use of vaccines with low efficacy may result in the development of more-virulent strains or strains with resistance to existing vaccines and antibodies. The prevalence of SARS-CoV-2 mutant strains differs between regions, and t…	Feb-22	2022/9/20 11:15	2022/9/20 11:15		459-470		2	167		Arch. Virol.								English							Place: Wien Publisher: Springer Wien WOS:000750310400001
C5G5EDZD	journalArticle	2022	Colson, Philippe; Fantini, Jacques; Yahi, Nouara; Delerce, Jeremy; Levasseur, Anthony; Fournier, Pierre-Edouard; Lagier, Jean-Christophe; Raoult, Didier; La Scola, Bernard	Limited spread of a rare spike E484K-harboring SARS-CoV-2 in Marseille, France	Archives of Virology		0304-8608	10.1007/s00705-021-05331-4		We detected SARS-CoV-2 of PANGO lineage R.1 with the spike substitution E484K in three patients. Eleven other sequences in France and 8,831 worldwide were available from GISAID, 92% originating from Japan. The three genome sequences from our institute were phylogenetically closest to another from Guinea-Conakry, where one of the patients had travelled. These viruses did not exhibit any unusual fe…	Feb-22	2022/9/20 11:15	2022/9/20 11:15		583-589		2	167		Arch. Virol.								English							Place: Wien Publisher: Springer Wien WOS:000750310400002				binding; protein
6IQ7PL93	journalArticle	2022	Kudlay, Dmitry; Svistunov, Andrey	COVID-19 Vaccines: An Overview of Different Platforms	Bioengineering-Basel			10.3390/bioengineering9020072		Vaccination is one of the key strategies to stop the COVID-19 pandemic. This review aims to evaluate the current state of vaccine development and to determine the issues that merit additional research. We conducted a literature review of the development of COVID-19 vaccines, their effectiveness, and their use in special patient groups. To date, 140 vaccines are in clinical development. Vector, RN…	Feb-22	2022/9/20 11:15	2022/9/20 11:15		72		2	9		Bioengineering-Basel								English							Place: Basel Publisher: Mdpi WOS:000763936100001				covid-19; mRNA; vaccine; boost; peptides; prevention; vector
YMXEHFZV	journalArticle	2022	Arslan, Yusuf; Akgul, Fethiye; Sevim, Bunyamin; Varol, Zeynep Sedef; Tekin, Suda	Re-infection in COVID-19: Do we exaggerate our worries?	European Journal of Clinical Investigation		0014-2972	10.1111/eci.13767		Background Protective long-term immunity following coronavirus disease 2019 (COVID-19) is unclear. The study evaluated the relationship between the vaccination status and risk factors in the re-infection of patients with a diagnosis of COVID-19 who reported to the Public Health Management System in a province in south-eastern Turkey. Methods Patients with positive results for the severe acute res…	Jun-22	2022/9/20 11:15	2022/9/20 11:15		e13767		6	52		Eur. J. Clin. Invest.								English							Place: Hoboken Publisher: Wiley WOS:000772990000001				covid-19; SARS-CoV-2; vaccination; coronavirus; sars-cov-2; re-infection
8MXIPKF6	journalArticle	2022	Kumar, Nathella Pavan; Moideen, Kadar; Nancy, Arul; Selvaraj, Nandhini; Renji, Rachel Mariam; Munisankar, Saravanan; Thangaraj, Jeromie Wesley Vivian; Muthusamy, Santhosh Kumar; Kumar, C. P. Girish; Bhatnagar, Tarun; Ponnaiah, Manickam; Ramasamy, Sabarinathan; Velusamy, Saravanakumar; Murhekar, Manoj Vasant; Babu, Subash	Enhanced SARS-CoV-2-Specific CD4(+) T Cell Activation and Multifunctionality in Late Convalescent COVID-19 Individuals	Viruses-Basel			10.3390/v14030511		Background: Examination of CD4(+) T cell responses during the natural course of severe acute respiratory syndrome coronavirus-2 (SARS-CoV-2) infection offers useful information for the improvement of vaccination strategies against this virus and the protective effect of these T cells. Methods: We characterized the SARS-CoV-2-specific CD4(+) T cell activation marker, multifunctional cytokine and c…	Mar-22	2022/9/20 11:15	2022/9/20 11:15		511		3	14		Viruses-Basel								English							Place: Basel Publisher: Mdpi WOS:000776428700001				covid-19; SARS-CoV-2; responses; coronavirus; memory; biology; CD4(+) T cells; cd69; cytokines
2DTEP23G	journalArticle	2022	El-Boghdadly, K.; Cook, T. M.; Goodacre, T.; Kua, J.; Denmark, S.; McNally, S.; Mercer, N.; Moonesinghe, S. R.; Summerton, D. J.	Timing of elective surgery and risk assessment after SARS-CoV-2 infection: an update A multidisciplinary consensus statement on behalf of the Association of Anaesthetists, Centre for Perioperative Care, Federation of Surgical Specialty Associations, Royal College of Anaesthetists, Royal College of Surgeons of England	Anaesthesia		0003-2409	10.1111/anae.15699		The impact of vaccination and new SARS-CoV-2 variants on peri-operative outcomes is unclear. We aimed to update previously published consensus recommendations on timing of elective surgery after SARS-CoV-2 infection to assist policymakers, administrative staff, clinicians and patients. The guidance remains that patients should avoid elective surgery within 7 weeks of infection, unless the benefit…	May-22	2022/9/20 11:15	2022/9/20 11:15		580-587		5	77		Anaesthesia								English							Place: Hoboken Publisher: Wiley WOS:000759221600001				covid-19; SARS-CoV-2; complications; surgery; timing
57JG9EQK	journalArticle	2022	Mueangpoon, Kulpatsorn; Inchan, Chapipak; Kaewmuneechoke, Panithan; Rattana, Peerunda; Budsratid, Supanut; Japakiya, Suthasinee; Ngamchaliew, Pitchayanont; Vichitkunakorn, Polathep	Self-Reported COVID-19 Vaccine Hesitancy and Willingness to Pay: A Cross-Sectional Survey in Thailand	Vaccines			10.3390/vaccines10040627		This study aimed to estimate the prevalence and influencing factors of COVID-19 vaccine hesitancy and willingness to pay in Thailand. A descriptive cross-sectional study was conducted from 13 September 2021 to 14 January 2022. Data were collected using an online questionnaire consisting of demographic characteristics, COVID-19 vaccine hesitancy (delay in acceptance and denying vaccination), deter…	Apr-22	2022/9/20 11:15	2022/9/20 11:15		627		4	10		Vaccines								English							Place: Basel Publisher: Mdpi WOS:000785288100001				covid-19; impact; infections; vaccine hesitancy; contingent assessment; demand; thrombosis; vaccine accessibility; vaccine comprehension; willingness to pay
SEBCQJAU	journalArticle		Arturo Guaracha-Basanez, Guillermo; Contreras-Yanez, Irazu; Alvarez-Hernandez, Everardo; Reyes-Cordero, Greta; Elsa Flores-Alvarado, Diana; Aidee Gonzalez-Chavez, Susana; Angel Galarza-Delgado, Dionicio; Rocio Martinez-Leyva, Perla; Francisco Moctezuma-Rios, Jose; Garcia-Garcia, Conrado; Medrano-Ramirez, Gabriel; Gastelum-Strozzi, Alfonso; Pacheco-Tena, Cesar; Pelaez-Ballestas, Ingris; Pascual-Ra…	Factors associated to COVID-19 vaccine acceptance in Mexican patients with rheumatic diseases: A cross-sectional and multicenter study	Human Vaccines & Immunotherapeutics		2164-5515	10.1080/21645515.2022.2049131		COVID-19 vaccination is recommended in patients with rheumatic diseases (RDs) to prevent hospitalized COVID-19 and worse outcomes. However, patients' willingness to receive a SARS-CoV-2 vaccine and the associated factors vary across populations, vaccines, and time. The objective was to identify factors associated with COVID-19 vaccine acceptance (VA) in Mexican outpatients with RDs. This multicen…		2022/9/20 11:15	2022/9/20 11:15							Human Vaccines Immunother.								English							Place: Philadelphia Publisher: Taylor & Francis Inc WOS:000779625600001				COVID-19 vaccine; hesitancy; vaccine hesitancy; vaccine acceptance; autoimmune; rheumatic diseases
GQKM9JYJ	journalArticle	2022	Oliva-Hernandez, Reynaldo; Farinas-Medina, Mildrey; Hernandez-Salazar, Tamara; Oyarzabal-Vera, Ambar; Infante-Bourzac, Juan F.; Rodriguez-Salgueiro, Sandra; Rodriguez-Noda, Laura M.; Arranguren-Masorra, Yisabel; Climent-Ruiz, Yanet; Fernandez-Castillo, Sonsire; G-Rivera, Daniel; Santana-Mederos, Darielys; Sanchez-Ramirez, Belinda; Garcia-Rivera, Dagmar; Valdes-Barbin, Yury; Verez-Bencomo, Vicente	Repeat-dose and local tolerance toxicity of SARS-CoV-2 FINLAY-FR-02 vaccine candidate in Sprague Dawley rats	Toxicology		0300-483X	10.1016/j.tox.2022.153161		This study evaluates safety of FINLAY-FR-02, a vaccine candidate against SARS-CoV-2 based on the recombinant receptor binding domain conjugated to tetanus toxoid, in a preclinical, repeat-dose toxicity and local tolerance study. Sprague Dawley rats were randomly allocated to three experimental groups: control (receiving physiological saline solution); placebo (receiving all vaccine components exc…	2022/4/15	2022/9/20 11:15	2022/9/20 11:15		153161			471		Toxicology								English							Place: Clare Publisher: Elsevier Ireland Ltd WOS:000789089500001				SARS-CoV-2; COVID-19 vaccine; blood; Conjugate vaccine; Cuba; Local tolerance; rbd; Repeat-dose toxicity; Sprague Dawley rats; substances; Tetanus toxoid
8DZK45UM	journalArticle	2022	Lee, Da In Diane; Vanderhout, Shelley; Aglipay, Mary; Birken, Catherine S.; Morris, Shaun K.; Piche-Renaud, Pierre-Philippe; Keown-Stoneman, Charles D. G.; Maguire, Jonathon L.	Delay in childhood vaccinations during the COVID-19 pandemic	Canadian Journal of Public Health-Revue Canadienne De Sante Publique		0008-4263	10.17269/s41997-021-00601-9		Objectives In many jurisdictions, routine medical care was reduced in response to the COVID-19 pandemic. The objective of this study was to determine whether the frequency of on-time routine childhood vaccinations among children age 0-2 years was lower following the COVID-19 declaration of emergency in Ontario, Canada, on March 17, 2020, compared to prior to the pandemic. Methods We conducted a l…	Feb-22	2022/9/20 11:15	2022/9/20 11:15		126-134		1	113		Can. J. Public Health-Rev. Can. Sante Publ.								English							Place: Cham Publisher: Springer Int Publ Ag WOS:000752912100015				covid-19; Immunization; health; outbreak; immunization; Immunization schedule; Vaccination coverage; Vaccinations
D3ANZUT5	journalArticle		Hsieh, Szu-Min; Chang, Shan-Chwen; Cheng, Hao-Yuan; Shih, Shin-Ru; Lien, Chia En	Durability and Immunogenicity of Neutralizing Antibodies Response Against Omicron Variants After Three Doses of Subunit SARS-CoV-2 Vaccine MVC-COV1901: An Extension to an Open-Label, Dose-Escalation Phase 1 Study	Infectious Diseases and Therapy		2193-8229	10.1007/s40121-022-00652-6		Introduction MVC-COV1901 is a protein subunit COVID-19 vaccine based on the stable prefusion spike protein S-2P adjuvanted with CpG 1018 and aluminum hydroxide. Interim results of a phase 2 clinical trial demonstrated favorable safety profile and immunogenicity and the vaccine has been authorized for use in Taiwan. However, waning antibody levels after immunization and variants of concern (VoC) c…		2022/9/20 11:15	2022/9/20 11:15							Infect. Dis. Ther.								English							Place: London Publisher: Springer London Ltd WOS:000796840300001				covid-19; SARS-CoV-2; Booster vaccination; mvc-cov1901; SARS-CoV-2 vaccine
CKIKVJ7I	journalArticle	2022	Tan, Li Feng; Huak, Chan Yiong; Siow, Isabel; Tan, Angel Justina; Venugopalan, Preetha Menon; Premkumar, Arthi; Seetharaman, Santhosh Kumar; Tan, Benjamin Y. Q.	The road to achieving herd immunity: factors associated with Singapore residents' uptake and hesitancy of the COVID-19 vaccination	Expert Review of Vaccines		1476-0584	10.1080/14760584.2022.2021883		Objective Achieving high vaccination rates is key to containing the coronavirus disease 2019 (COVID-19). This study evaluated the factors associated with uptake of the COVID-19 vaccine. Methods Six hundred and seventy-six respondents were surveyed online between May and June 2021. Data on demographics, perception of the COVID-19 pandemic, and vaccine willingness and hesitancy factors were collect…	2022/4/3	2022/9/20 11:15	2022/9/20 11:15		561-567		4	21		Expert Rev. Vaccines								English							Place: Abingdon Publisher: Taylor & Francis Ltd WOS:000741252100001				covid-19; Vaccination; perceptions; hesitancy; public health
7AG7YTY2	journalArticle	2022	Demongeot, Jacques; Griette, Quentin; Magal, Pierre; Webb, Glenn	Modeling Vaccine Efficacy for COVID-19 Outbreak in New York City	Biology-Basel			10.3390/biology11030345		Simple Summary This article aims to study the COVID-19 data for New York City. We use both the daily number of second dose vaccination and the daily number of reported cases for New York City. This article provides a method to combine an epidemic model and such data. We explore the influence of vaccine efficacy on our results. In this article we study the efficacy of vaccination in epidemiologica…	Mar-22	2022/9/20 11:15	2022/9/20 11:15		345		3	11		Biology-Basel								English							Place: Basel Publisher: Mdpi WOS:000775846100001				coronavirus; epidemic model; parameters identification; reported and unreported cases; vaccine efficacy
7NQC2ZCH	journalArticle	2022	Choi, Kristen; Chang, John; Luo, Yi X.; Lewin, Bruno; Munoz-Plaza, Corrine; Bronstein, David; Rondinelli, June; Bruxvoort, Katia	"Still on the Fence:" A Mixed Methods Investigation of COVID-19 Vaccine Confidence Among Health Care Providers	Workplace Health & Safety		2165-0799	10.1177/21650799211049811		Background: There is evidence of disparities in COVID-19 vaccine acceptance among health care providers. The purpose of this study was to examine confidence receiving and recommending COVID-19 vaccines by health care provider type and race/ethnicity. Methods: This mixed methods study involved a cross-sectional survey and qualitative, semi-structured interviews from March to May 2021 among a sampl…	Jun-22	2022/9/20 11:15	2022/9/20 11:15		285-297		6	70		Workplace Health Saf.								English							Place: Thousand Oaks Publisher: Sage Publications Inc WOS:000773604300001				covid-19; united-states; hesitancy; race; ethnicity; health care provider; vaccine confidence
UTSX4MNF	journalArticle	2022	Caron, Rosemary M.; Dorsey, M. Girard	Challenges, Inquiry, and Recommendations: Effective COVID-19 Vaccine Management in the Face of Public Mistrust and Concern	Frontiers in Communication			10.3389/fcomm.2021.734996		By examining concerns about safety, compliance, and distribution through an interdisciplinary approach of public health and history, we argue that historical and contemporary mistrust of immunizations serves to challenge the successful management of a COVID-19 vaccine program in the U.S. Unique circumstances surrounding the development of a COVID-19 vaccine, including pressure for rapid productio…	2022/1/4	2022/9/20 11:15	2022/9/20 11:15		734996			6		Front. Commun.								English							Place: Lausanne Publisher: Frontiers Media Sa WOS:000745994600001				covid-19; vaccine; safety; compliance; distribution
YE5HTZ2Z	journalArticle	2022	Wang, Fang; Xu, Jia; Xu, Shu-Jun; Guo, Jie-Jie; Wang, Feiming; Wang, Qin-Wen	Analysis and Identification Genetic Effect of SARS-CoV-2 Infections to Alzheimer's Disease Patients by Integrated Bioinformatics	Journal of Alzheimers Disease		1387-2877	10.3233/JAD-215086		Background: COVID-19 pandemic is a global crisis which results in millions of deaths and causes long-term neurological sequelae, such as Alzheimer's disease (AD). Objective: We aimed to explore the interaction between COVID-19 and AD by integrating bioinformatics to find the biomarkers which lead to AD occurrence and development with COVID-19 and provide early intervention. Methods: The different…	2022	2022/9/20 11:15	2022/9/20 11:15		729-744		2	85		J. Alzheimers Dis.								English							Place: Amsterdam Publisher: Ios Press WOS:000747048000022				covid-19; roles; Alzheimer's disease; bioinformatics; calcium; compound; differentially expressed genes; dysregulation; epac; hub gene; long-term potentiation
RU5WBCW7	journalArticle	2022	Benahmadi, Lahbib; Lhous, Mustapha; Tridane, Abdessamad; Zakary, Omar; Rachik, Mostafa	Modeling the Impact of the Imperfect Vaccination of the COVID-19 with Optimal Containment Strategy	Axioms			10.3390/axioms11030124		Since the beginning of the COVID-19 pandemic, vaccination has been the main strategy to contain the spread of the coronavirus. However, with the administration of many types of vaccines and the constant mutation of viruses, the issue of how effective these vaccines are in protecting the population is raised. This work aimed to present a mathematical model that investigates the imperfect vaccine a…	Mar-22	2022/9/20 11:15	2022/9/20 11:15		124		3	11		Axioms								English							Place: Basel Publisher: Mdpi WOS:000775782800001				covid-19; vaccination; curtail; will; optimal control; stability; basic reproduction number; Lyapunov function
5LKCVU8T	journalArticle		Peradotto, Marco; Bondi, A.; Lombardi, D.; Bottino, P.; Zanotto, E.; Barbui, A. M.; Cavallo, R.	The impact of COVID-19 pandemic control on vaccine-preventable invasive bacterial diseases in Piedmont (Italy)	Infection		0300-8126	10.1007/s15010-022-01770-6		Purpose The impact of SARS-CoV-2 pandemic on other pathogens is largely unknown. We aimed to compare the prevalence of vaccine-preventable invasive bacterial infections before and during the pandemic in Piedmont (Italy). Methods We defined the monthly incidence of S. pneumoniae, H. influenzae and N. meningitides-invasive diseases from January 2010 to June 2021. Then, we compared the mean monthly …		2022/9/20 11:15	2022/9/20 11:15							Infection								English							Place: Heidelberg Publisher: Springer Heidelberg WOS:000756233900001				Bacterial-invasive infections; COVID-19 pandemic; Social distancing; Vaccine-preventable diseases
SPHMJD7F	journalArticle	2022	Krutikov, Maria; Palmer, Tom; Tut, Gokhan; Fuller, Christopher; Azmi, Borscha; Giddings, Rebecca; Shrotri, Madhumita; Kaur, Nayandeep; Sylla, Panagiota; Lancaster, Tara; Irwin-Singer, Aidan; Hayward, Andrew; Moss, Paul; Copas, Andrew; Shallcross, Laura	Prevalence and duration of detectable SARS-CoV-2 nucleocapsid antibodies in staff and residents of long-term care facilities over the first year of the pandemic (VIVALDI study): prospective cohort study in England	Lancet Global Health		2214-109X	10.1016/S2666-7568(21)00282-8		Background Long-term care facilities (LTCFs) have reported high SARS-CoV-2 infection rates and related mortality, but the proportion of infected people among those who have survived, and duration of the antibody response to natural infection, is unknown. We determined the prevalence and stability of nucleocapsid antibodies (the standard assay for detection of previous infection) in staff and resi…	Jan-22	2022/9/20 11:15	2022/9/20 11:15		E13-E21		1	3		Lancet Glob. Health								English							Place: Oxford Publisher: Elsevier Sci Ltd WOS:000744586600008				responses; covid-19 outbreaks; homes
GUTC8EZH	journalArticle	2022	Blakeway, Helena; Prasad, Smriti; Kalafat, Erkan; Heath, Paul T.; Ladhani, Shamez N.; Le Doare, Kirsty; Magee, Laura A.; O'Brien, Pat; Rezvani, Arezou; von Dadelszen, Peter; Khalil, Asma	COVID-19 vaccination during pregnancy: coverage and safety	American Journal of Obstetrics and Gynecology		0002-9378	10.1016/j.ajog.2021.08.007		BACKGROUND: Concerns have been raised regarding a potential surge of COVID-19 in pregnancy, secondary to the rising numbers of COVID-19 in the community, easing of societal restrictions, and vaccine hesitancy. Although COVID-19 vaccination is now offered to all pregnant women in the United Kingdom; limited data exist on its uptake and safety. OBJECTIVE: This study aimed to investigate the uptake …	Feb-22	2022/9/20 11:15	2022/9/20 11:15				2	226		Am. J. Obstet. Gynecol.								English							Place: New York Publisher: Mosby-Elsevier WOS:000748428700003				covid-19; pregnancy; SARS-CoV-2; vaccination; mRNA; immunization; coverage; safety vaccine uptake; viral vector
EAZ5V9K5	journalArticle	2022	Ajmera, Kunal; Bansal, Rashika; Wilkinson, Heather; Goyal, Lokesh	Gastrointestinal Complications of COVID-19 Vaccines	Cureus Journal of Medical Science			10.7759/cureus.24070		Much of the control over the coronavirus disease 2019 (COVID-19) pandemic has been achieved by mass vaccination against the severe acute respiratory syndrome coronavirus 2 (SARS-CoV-2), the etiologic agent that causes COVID-19. The COVID-19 mRNA (messenger RNA) vaccines are relatively newly approved and have been widely used in the US since they first became available. However, with passing time,…	2022/4/12	2022/9/20 11:15	2022/9/20 11:15		e24070		4	14		Cureus J Med Sci								English							Place: Palo Alto Publisher: Cureus Inc WOS:000791403700034				covid-19; covid-19 vaccine; adverse events; diverticular-disease; diverticulitis colon; gastrointestinal complications
5S9FAE89	journalArticle	2022	Sauerwein, Kai M. T.; Geier, Christoph B.; Stemberger, Roman F.; Akyaman, Hueseyin; Illes, Peter; Fischer, Michael B.; Eibl, Martha M.; Walter, Jolan E.; Wolf, Hermann M.	Antigen-Specific CD4(+) T-Cell Activation in Primary Antibody Deficiency After BNT162b2 mRNA COVID-19 Vaccination	Frontiers in Immunology		1664-3224	10.3389/fimmu.2022.827048		Previous studies on immune responses following COVID-19 vaccination in patients with common variable immunodeficiency (CVID) were inconclusive with respect to the ability of the patients to produce vaccine-specific IgG antibodies, while patients with milder forms of primary antibody deficiency such as immunoglobulin isotype deficiency or selective antibody deficiency have not been studied at all.…	2022/2/14	2022/9/20 11:15	2022/9/20 11:15		827048			13		Front. Immunol.								English							Place: Lausanne Publisher: Frontiers Media Sa WOS:000761451200001				sars-cov-2; activation induced marker assay; circulating follicular T helper cells; common variable immunodeficiency; CXCR5-negative CD4(+) memory T cells; immunity; primary immunoglobulin isotype deficiency; surrogate virus neutralization assay
W3AFEQSF	journalArticle	2022	Schimmel, Matt; Berkowitz, David M.	Pulmonary Procedures in the COVID-19 Era	Current Pulmonology Reports			10.1007/s13665-022-00285-7		Purpose of Review The purpose of this review is to discuss the impact of the COVID-19 pandemic on pulmonary procedures, including new guidelines, restrictions, techniques, and overall effect on patient care. Recent Findings SARS-CoV-2 predominately impacts the pulmonary system and can result in a severe lower respiratory tract infection. Early guidelines based largely on data from the SARS epidem…	Jun-22	2022/9/20 11:15	2022/9/20 11:15		39-47		2	11		Curr. Pulmonol. Rep.								English							Place: New York Publisher: Springer WOS:000776336300001				covid-19; SARS-CoV-2; sars-cov-2; transmission; acute respiratory syndrome; Aerosol-generating procedures; AGPs; bronchoscopy; Bronchoscopy; consensus statement; droplets; intubation; pleural effusion; precautions; recommendations; Tracheostomy
FPK5FU25	journalArticle		Prestage, G.; Storer, D.; Jin, F.; Haire, B.; Maher, L.; Philpot, S.; Bavinton, B.; Saxton, P.; Murphy, D.; Holt, M.; Bourne, A.; Hammoud, M. A.	COVID-19 Vaccine Uptake and Its Impacts in a Cohort of Gay and Bisexual Men in Australia	Aids and Behavior		1090-7165	10.1007/s10461-022-03611-x		Successful use of biomedical forms of HIV risk-reduction may have predisposed many gay and bisexual men (GBM) to vaccination against COVID-19, which may, in turn, affect their sexual behavior. A total of 622 Australian GBM provided weekly data on COVID-19 vaccination history and sexual behaviour between 17 January 2021 and 22 June 2021. We identify factors associated with COVID-19 vaccination, an…		2022/9/20 11:15	2022/9/20 11:15							AIDS Behav.								English							Place: New York Publisher: Springer/Plenum Publishers WOS:000752142400001				covid-19; behavior; Gay and bisexual men; hiv; sex; Sexual behaviour; Vaccines
JU3LR8EA	journalArticle	2022	Wu, Xiaoheng; Shen, Min; Quan, Hui; Zhang, Xianqin; Xu, Fengcheng; Li, Juan; He, Miao; Pan, Dongmei; Cao, Ling; Yue, Changwu; Liu, Tianhu; Jia, Xu	Shedding of SARS-CoV-2 for 85 Days in COVID-19 Patients With Type 2 Diabetes Mellitus and Lung Metastasis: A Case Report	Frontiers in Medicine			10.3389/fmed.2022.828819		BackgroundCOVID-19 (coronavirus disease 2019) caused by severe acute respiratory syndrome coronavirus 2 (SARS-CoV-2) seriously endangers people's lives. The variation in SARS-CoV-2 makes the research and development of vaccines and specific drugs particularly important. However, the prevention and diagnosis of COVID-19 cannot be underestimated in the control of the epidemic. Case PresentationWe i…	2022/3/28	2022/9/20 11:15	2022/9/20 11:15		828819			9		Front. Med.								English							Place: Lausanne Publisher: Frontiers Media Sa WOS:000783337100001				SARS-CoV-2; cancer; asymptomatic; reinfection; lung-occupying site; type 2 diabetes
2FHX9U4S	journalArticle	2022	Chinnadurai, Rajkumar; Wu, Henry H. L.; Cox, Eleanor; Moore, Jayne; Clough, Toni; Lamerton, Elizabeth; Donne, Rosie; O'Riordan, Edmond; Poulikakos, Dimitrios	Humoral Response in Hemodialysis Patients Following COVID-19 Vaccination and Breakthrough Infections during Delta and Omicron Variant Predominance	Vaccines			10.3390/vaccines10040498		Background: The advancement of COVID-19 vaccination programs globally has been viewed as an integral strategy to reduce both the number of COVID-19 cases and consequential complications of COVID-19, particularly for high-risk patient groups. There are limited data on the antibody response and protection from disease infection and severity in patients requiring hemodialysis (HD) following COVID-19…	Apr-22	2022/9/20 11:15	2022/9/20 11:15		498		4	10		Vaccines								English							Place: Basel Publisher: Mdpi WOS:000786237400001				hemodialysis; humoral response; COVID-19 vaccination; Omicron variant; antibody-response; breakthrough infections; Delta variant; hepatitis-b vaccine
8H755GRC	journalArticle	2022	Weinstein, Jules B.; Bates, Timothy A.; Leier, Hans C.; McBride, Savannah K.; Barklis, Eric; Tafesse, Fikadu G.	A potent alpaca-derived nanobody that neutralizes SARS-CoV-2 variants	Iscience			10.1016/j.isci.2022.103960		The spike glycoprotein of SARS-CoV-2 engages with human ACE 2 to facilitate infection. Here, we describe an alpaca-derived heavy chain antibody fragment (VHH), saRBD-1, that disrupts this interaction by competitively binding to the spike protein receptor-binding domain. We further generated an engineered bivalent nanobody construct engineered by a flexible linker and a dimeric Fc conjugated nanob…	2022/3/18	2022/9/20 11:15	2022/9/20 11:15		103960		3	25		iScience								English							Place: Cambridge Publisher: Cell Press WOS:000773676100006				vaccine; domain; antibody; ace2
7HB4L2VS	journalArticle		Pasfield, K.; Gottlieb, T.; Tartari, E.; Ward, M. P.; Quain, A.	Sickness presenteeism associated with influenza-like illness in veterinarians working in New South Wales: Results of a state-wide survey	Australian Veterinary Journal		0005-0423	10.1111/avj.13153		Background Sickness presenteeism in the veterinary profession potentially jeopardises the wellbeing of veterinary team members and endangers quality of patient care. In veterinary team members with influenza-like illness (ILI), sickness presenteeism poses a risk to the health and wellbeing of colleagues and clients, particularly in the context of the COVID-19 pandemic. This study aimed to evaluat…		2022/9/20 11:15	2022/9/20 11:15							Aust. Vet. J.								English							Place: Hoboken Publisher: Wiley WOS:000755350800001				covid-19; vaccination; health; burnout; influenza-like illness; sickness presenteeism; sickness absenteeism; stress; veterinarian; wellbeing
Q4MBX4T8	journalArticle	2022	Shi, Dallas S.; Whitaker, Michael; Marks, Kristin J.; Anglin, Onika; Milucky, Jennifer; Patel, Kadam; Pham, Huong; Chai, Shua J.; Kawasaki, Breanna; Meek, James; Anderson, Evan J.; Weigel, Andy; Henderson, Justin; Lynfield, Ruth; Ropp, Susan L.; Muse, Alison; Bushey, Sophrena; Billing, Laurie M.; Sutton, Melissa; Talbot, H. Keipp; Price, Andrea; Taylor, Christopher A.; Havers, Fiona P.	Hospitalizations of Children Aged 5-11 Years with Laboratory-Confirmed COVID-19-COVID-NET, 14 States, March 2020-February 2022	Mmwr-Morbidity and Mortality Weekly Report		0149-2195				2022/4/22	2022/9/20 11:15	2022/9/20 11:15		574-581		16	71		MMWR-Morb. Mortal. Wkly. Rep.								English							Place: Atlanta Publisher: Centers Disease Control & Prevention WOS:000795044400001				united-states; adolescents; messenger-rna vaccination
3HT2IPYD	journalArticle	2022	Woldemeskel, Bezawit A.; Dykema, Arbor G.; Garliss, Caroline C.; Cherfils, Saphira; Smith, Kellie N.; Blankson, Joel N.	CD4(+) T cells from COVID-19 mRNA vaccine recipients recognize a conserved epitope present in diverse coronaviruses	Journal of Clinical Investigation		0021-9738	10.1172/JCI156083		Recent studies have shown that vaccinated individuals harbor T cells that can cross-recognize SARS-CoV-2 and endemic human common cold coronaviruses. However, it is still unknown whether CD4(+) T cells from vaccinated individuals recognize peptides from bat coronaviruses that may have the potential of causing future pandemics. In this study, we identified a SARS-CoV-2 spike protein epitope (S815-…	2022/3/1	2022/9/20 11:15	2022/9/20 11:15		e156083		5	132		J. Clin. Invest.								English							Place: Ann Arbor Publisher: Amer Soc Clinical Investigation Inc WOS:000765058800005				responses
7I3EZB9Q	journalArticle	2022	Gruell, Henning; Vanshylla, Kanika; Tober-Lau, Pinkus; Hillus, David; Schommers, Philipp; Lehmann, Clara; Kurth, Florian; Sander, Leif E.; Klein, Florian	mRNA booster immunization elicits potent neutralizing serum activity against the SARS-CoV-2 Omicron variant	Nature Medicine		1078-8956	10.1038/s41591-021-01676-0		Neutralization of the SARS-CoV-2 Omicron variant is markedly impaired in sera from recipients of two doses of the COVID-19 vaccine BNT162b2 or from convalescent individuals, but is robustly increased in both groups following a booster vaccine dose. The Omicron variant of SARS-CoV-2 is causing a rapid increase in infections across the globe. This new variant of concern carries an unusually high nu…	Mar-22	2022/9/20 11:15	2022/9/20 11:15		477-+		3	28		Nat. Med.								English							Place: Berlin Publisher: Nature Portfolio WOS:000745735100002
B9EVNFB2	journalArticle		Jia, Fangju; Wang, Dong-dong; Li, Lianshui	The stochastic evolutionary game analysis of public prevention and control strategies in public health emergencies	Kybernetes		0368-492X	10.1108/K-10-2021-0988		Purpose The COVID-19 epidemic is still spreading globally and will not be completely over in a short time. Wearing a mask is an effective means to combat the spread of COVID-19. However, whether the public wear a mask for epidemic prevention and control will be affected by stochastic factors such as vaccination, cultural differences and irrational emotions, which bring a high degree of uncertaint…		2022/9/20 11:15	2022/9/20 11:15							Kybernetes								English							Place: Bingley Publisher: Emerald Group Publishing Ltd WOS:000752983200001				risk; dynamics; model; Moran process; Public health emergency; Public prevention and control strategy; Stochastic evolutionary game
CGWMQRS4	journalArticle		Shashar, Moshe; Nacasch, Naomi; Grupper, Ayelet; Benchetrit, Sydney; Halperin, Tamar; Erez, Daniel; Rozenberg, Ilan; Shitrit, Pnina; Sela, Yaron; Wand, Ori; Cohen-Hagai, Keren	Humoral Response to Pfizer BNT162b2 Vaccine Booster in Maintenance Hemodialysis Patients	American Journal of Nephrology		0250-8095	10.1159/000521676		Introduction: Coronavirus disease is associated with increased morbidity and mortality in maintenance hemodialysis (MHD) patients. Recent breakthrough infection in vaccinated people has led some authorities to recommend a booster dose for patients fully vaccinated 5-8 months ago. We aimed to assess the humoral response of MHD patients following a booster dose with the BNT162b2 vaccine. Methods: T…		2022/9/20 11:15	2022/9/20 11:15							Am. J. Nephrol.								English							Place: Basel Publisher: Karger WOS:000759803300001				COVID-19 vaccine; dialysis; COVID-19 virus; Hemodialysis
8SY5SG5S	journalArticle	2022	Zhang, Dapeng; Atochina-Vasserman, Elena N.; Lu, Juncheng; Maurya, Devendra S.; Xiao, Qi; Liu, Matthew; Adamson, Jasper; Ona, Nathan; Reagan, Erin K.; Ni, Houping; Weissman, Drew; Percec, Virgil	The Unexpected Importance of the Primary Structure of theHydrophobic Part of One-Component Ionizable Amphiphilic JanusDendrimers in Targeted mRNA Delivery Activity br	Journal of the American Chemical Society		0002-7863	10.1021/jacs.2c00273		Viral and synthetic vectors for delivery of nucleic acids impacted genetic nanomedicine by aiding the rapiddevelopment of the extraordinarily efficient Covid-19 vaccines. Access to targeted delivery of nucleic acids is expected to expand thefield of nanomedicine beyond most expectations. Both viral and synthetic vectors have advantages and disadvantages. The majoradvantage of the synthetic vector…	2022/3/23	2022/9/20 11:15	2022/9/20 11:15		4746-4753		11	144		J. Am. Chem. Soc.								English							Place: Washington Publisher: Amer Chemical Soc WOS:000777169400008				architectures; defined janus glycodendrimers; dendrimersomes; gene; lipid nanoparticles; nonviral vectors; periodic-table; sirna; systematic framework; viral vectors
E85IJ3DH	journalArticle		Hood, Veronica; Berg, Anne T.; Knupp, Kelly G.; Koh, Sookyong; Laux, Linda; Meskis, Mary Anne; Zulfiqar-Ali, Quratulain; Perry, M. Scott; Scheffer, Ingrid E.; Sullivan, Joseph; Wirrell, Elaine; Andrade, Danielle M.	COVID-19 vaccine in patients with Dravet syndrome: Observations and real-world experiences	Epilepsia		0013-9580	10.1111/epi.17250		Objective Vaccination against the SARS-CoV-2 virus is a primary tool to combat the COVID-19 pandemic. However, vaccination is a common seizure trigger in individuals with Dravet syndrome (DS). Information surrounding COVID-19 vaccine side effects in patients with DS would aid caregivers and providers in decisions for and management of COVID-19 vaccination. Methods A survey was emailed to the Drav…		2022/9/20 11:15	2022/9/20 11:15							Epilepsia								English							Place: Hoboken Publisher: Wiley WOS:000784044100001				covid-19; vaccine; Dravet; seizures; survey
XFMLHQDC	journalArticle		Paul, Elise; Fancourt, Daisy; Razai, Mohammad	Racial discrimination, low trust in the health system and COVID-19 vaccine uptake: a longitudinal observational study of 633 UK adults from ethnic minority groups	Journal of the Royal Society of Medicine		0141-0768	10.1177/01410768221095241		Objectives To examine whether racial/ethnic discrimination predicts future COVID-19 vaccine refusal, and whether this association is explained by trust in government and the health system. Design Longitudinal observational study of racial/ethnic discrimination occurring since the start of the first lockdown (measured in July 2020) and later COVID-19 vaccine status. Setting UK (England, Scotland, …		2022/9/20 11:15	2022/9/20 11:15		1.41077E+15					J. R. Soc. Med.								English							Place: London Publisher: Sage Publications Ltd WOS:000796572800001				hesitancy; public health; care; scale; Epidemiologic studies; experiences; medical mistrust; predictors; sample; vaccination programmes
ZLVEI79T	journalArticle	2022	Mathur, Medha; Verma, Anjana; Mathur, Navgeet; Singhal, Yogesh; Dixit, Mukul; Patyal, Ashish; Kumar, Dewesh; Patani, Jignasaben; Choudhary, Suresh; Hirani, Jitendra	Predictors and Perceptions of Healthcare Workers Regarding Vaccines Safety in the Initial Phase of COVID-19 Vaccination Drive in Western Part of India: A Regression Analysis	Cureus Journal of Medical Science			10.7759/cureus.21267		Background The COVID-19 vaccination was launched in a phased manner by the government of India prioritizing healthcare workers. This study assessed the perception of healthcare workers regarding COVID-19 vaccination. Methods This cross-sectional study was conducted among healthcare workers vaccinated at a tertiary care center of southern Rajasthan. Logistic regression analysis was used to note th…	2022/1/15	2022/9/20 11:15	2022/9/20 11:15		e21267		1	14		Cureus J Med Sci								English							Place: Palo Alto Publisher: Cureus Inc WOS:000745301600021				willingness; covid-19 vaccine; vaccine hesitancy; vaccine acceptance; health professionals; india
ZPSLCQC9	journalArticle	2022	Dokainish, Hisham M.; Re, Suyong; Mori, Takaharu; Kobayashi, Chigusa; Jung, Jaewoon; Sugita, Yuji	The inherent flexibility of receptor binding domains in SARS-CoV-2 spike protein	Elife		2050-084X	10.7554/eLife.75720		Spike (S) protein is the primary antigenic target for neutralization and vaccine development for the severe acute respiratory syndrome coronavirus 2 (SARS-CoV-2). It decorates the virus surface and undergoes large motions of its receptor binding domains (RBDs) to enter the host cell. Here, we observe Down, one-Up, one-Open, and two-Up-like structures in enhanced molecular dynamics simulations, an…	2022/3/24	2022/9/20 11:15	2022/9/20 11:15		e75720			11		eLife								English							Place: Cambridge Publisher: eLIFE SCIENCES PUBL LTD WOS:000784396700001				SARS-CoV-2; Human; algorithm; conformational transition; cryptic pockets; enhanced sampling; molecular-dynamics; rattle; shake; spike protein; version
QAV6NLPV	journalArticle	2022	Grieco, Teresa; Ambrosio, Luca; Trovato, Federica; Vitiello, Martina; Demofonte, Ilaria; Fanto, Marta; Paolino, Giovanni; Pellacani, Giovanni	Effects of Vaccination against COVID-19 in Chronic Spontaneous and Inducible Urticaria (CSU/CIU) Patients: A Monocentric Study	Journal of Clinical Medicine			10.3390/jcm11071822		Background: Patients affected by pre-existing chronic spontaneous/Inducible urticaria (CSU/CIU) still feel unsafe due to the potential risk of an Adverse Event Following Immunization (AEFI) and Cutaneous Adverse Reactions (CARs) of COVID-19 vaccines. The appropriate management in this field remains debated and evidence is still lacking. Methods: We considered 160 CSU/CIU patients in Omalizumab/an…	Apr-22	2022/9/20 11:15	2022/9/20 11:15		1822		7	11		J. Clin. Med.								English							Place: Basel Publisher: Mdpi WOS:000780495000001				covid-19; SARS-CoV-2; vaccines; chronic; cutaneous; reactions; skin; urticaria
3HSHRYZI	journalArticle	2022	Mattiuzzi, Camilla; Lippi, Giuseppe	Efficacy of COVID-19 vaccine booster doses in older people	European Geriatric Medicine		1878-7649	10.1007/s41999-022-00615-7		Purpose We provide here an updated analysis on efficacy of COVID-19 vaccine booster doses in older people (i. e., aged >= 80 years) based on ongoing Italian nationwide COVID-19 vaccination campaign. Methods Data were obtained from the COVID-19 national integrated surveillance program, made available and regularly updated by the Italian National Institute of Health. Results Compared to those who c…	Feb-22	2022/9/20 11:15	2022/9/20 11:15		275-278		1	13		Eur. Geriatr. Med.								English							Place: New York Publisher: Springer WOS:000745752000002				covid-19; Vaccination; sars-cov-2; Booster; Older people
KJ9UIJES	journalArticle		Havidz, Shinta Amalina Hazrati; Tiffani, Tiffani; Calvilus, Ingrid Claudia; Angelita, Zefanya	COVID-19 full vaccination and blockchain size: empirical evidence from the cryptocurrency market	Euromed Journal of Business		1450-2194	10.1108/EMJB-12-2021-0200		Purpose This paper aims to analyse COVID-19 indices and blockchain features on Bitcoin and Ethereum returns, respectively. The authors focus on the most used and owned cryptocurrencies that cover Europe, the US and Asian countries. Design/methodology/approach An autoregressive distributed lag panel (pooled mean group and mean group) is utilized, and a robustness check is incorporated by using a R…		2022/9/20 11:15	2022/9/20 11:15							EuroMed J. Bus.								English							Place: Bingley Publisher: Emerald Group Publishing Ltd WOS:000787804000001				covid-19; Vaccine; sentiment; ARDL panel; bitcoin; Blockchain; Cryptocurrency; economic-growth; openness; panel-data; specification; tests; Vaccine confidence index
KVVNRG3K	journalArticle	2022	Fallahi, Mohammad Javad; Shahri, Navid Esmaeilzadeh; Khodamoradi, Zohre; Nia, Moazameh Meymandi; Sehatpour, Faezeh; Mahmoudi, Laleh	Case of possible encephalopathy following receiving the first dose of Iranian COVID-19Vaccine; COVIran Barakat	Clinical Case Reports		2050-0904	10.1002/ccr3.5661		We report a case of possible encephalopathy after receiving the first dose of Iran's COVIran Barekat vaccine. The patient had no history of neurological or mental illness. Clinical examinations and radiology reports were performed and differential diagnoses were analyzed by the treatment team. Finally, the possible association between vaccination and encephalopathy was concluded.	Apr-22	2022/9/20 11:15	2022/9/20 11:15		e05661		4	10		Clin. Case Rep.								English							Place: Hoboken Publisher: Wiley WOS:000779049300001				covid-19; vaccine; autoimmunity; COVIran Barekat; encephalopathy
2LWSNMW8	journalArticle	2022	Georgiou, Archelle; Chang, Jessica; Karaca-Mandic, Pinar	Association of Large Financial Incentives With COVID-19 Vaccination Uptake Among Employees of a Large Private Company	Jama Network Open		2574-3805	10.1001/jamanetworkopen.2022.9812			2022/4/29	2022/9/20 11:15	2022/9/20 11:15		e229812		4	5		JAMA Netw. Open								English							Place: Chicago Publisher: Amer Medical Assoc WOS:000788722700012
LUR6R3WI	journalArticle	2022	Giustina, A.; Bilezikian, J. P.	Revisiting the endocrine and metabolic manifestations of COVID-19 two years into the pandemic	Reviews in Endocrine & Metabolic Disorders		1389-9155	10.1007/s11154-022-09716-x		An extraordinary effort of the universal endocrine community has led to important insights into endocrine and metabolic aspects of COVID-19. In this Editorial, we introduce a special issue of Reviews in Endocrine and Metabolic Disorders that calls attention, through the efforts of internationally recognized experts in the field, to features that are now widely recognized as endocrine and metaboli…	Apr-22	2022/9/20 11:15	2022/9/20 11:15		133-136		2	23		Rev. Endocr. Metab. Disord.								English							Place: New York Publisher: Springer WOS:000758300400001				covid-19; Vaccination; statement; adult patients; Calcium; Endocrine Phenotype; european-society; Pituitary; Vitamin D
TZ8MYAX5	journalArticle	2022	Romantowski, Jan; Kruszewski, Jerzy; Solarski, Oskar; Bant, Andrzej; Chcialowski, Andrzej; Pietrzyk, Ilona; Sanpruch, Patrycja; Gorska, Aleksandra; Chelminska, Marta; Knurowska, Agata; Gawinowska, Marika; Jassem, Ewa; Niedoszytko, Marek	Protocol of safe vaccination against COVID-19 in patients with high risk of allergic reactions	Clinical and Translational Allergy			10.1002/clt2.12152		Background Sars-CoV-2 infections are hazardous, especially to the elderly and patients with comorbidities. With no efficient treatment available, newly developed vaccines are the only way to change the course of the pandemic. However, reports of allergic reactions resulted in some patients and practicing physicians being concerned about the safety of vaccine administration, particularly in people…	May-22	2022/9/20 11:15	2022/9/20 11:15		e12152		5	12		Clin. Transl. Allergy								English							Place: Hoboken Publisher: Wiley WOS:000796372900001				vaccination; coronavirus; sars-cov-2; allergen; immunity
GWP98J3N	journalArticle		Wagner, Abram L.; Porth, Julia M.; Wu, Zhenke; Boulton, Matthew L.; Finlay, Jessica M.; Kobayashi, Lindsay C.	Vaccine Hesitancy During the COVID-19 Pandemic: A Latent Class Analysis of Middle-Aged and Older US Adults	Journal of Community Health		0094-5145	10.1007/s10900-022-01064-w		It is important to distinguish between apprehensions that lead to vaccine rejection and those that do not. In this study, we (1) identifed latent classes of individuals by vaccination attitudes, and (2) compared classes of individuals by sociodemographic characteristics COVID-19 vaccination, and risk reduction behaviors. The COVID-19 Coping Study is a longitudinal cohort of US adults aged >= 55 y…		2022/9/20 11:15	2022/9/20 11:15							J. Community Health								English							Place: New York Publisher: Springer WOS:000746787500001				covid-19; Vaccination; Older people; shanghai
H64B8YEH	journalArticle	2022	Hudak, Anett; Veres, Gabor; Letoha, Annamaria; Szilak, Laszlo; Letoha, Tamas	Syndecan-4 Is a Key Facilitator of the SARS-CoV-2 Delta Variant's Superior Transmission	International Journal of Molecular Sciences			10.3390/ijms23020796		Emerging SARS-CoV-2 variants pose threats to vaccination campaigns against COVID-19. Being more transmissible than the original virus, the SARS-CoV-2 B.1.617 lineage, named the Delta variant, swept through the world in 2021. The mutations in the Delta's spike protein shift the protein towards a net positive electrostatic potential. To understand the key molecular drivers of the Delta infection, w…	Jan-22	2022/9/20 11:15	2022/9/20 11:15		796		2	23		Int. J. Mol. Sci.								English							Place: Basel Publisher: Mdpi WOS:000746974100001				SARS-CoV-2; entry; protein; Delta variant; ace2; arginine-rich peptides; attachment; biogps; cellular entry; endocytosis; expression; heparan sulfate proteoglycans; proteoglycans; scientists know; syndecan; viral transmission
9U84JEXA	journalArticle	2022	Chen, Wenhong; Huang, Gejun; Hu, An	Red, yellow, green or golden: the post-pandemic future of China's health code apps	Information Communication & Society		1369-118X	10.1080/1369118X.2022.2027502		The red, yellow, and green three-colored health code apps (HCAs) have been credited as an effective tool for the COVID-19 response in China, with a golden color added indicating vaccination status in spring 2021. Although the success of HCA as a public health intervention might have legitimized government or corporate surveillance, the scope and contour of post-pandemic HCA use remain unclear. Bo…	2022/4/4	2022/9/20 11:15	2022/9/20 11:15		618-633		5	25		Info. Commun. Soc.								English							Place: Abingdon Publisher: Routledge Journals, Taylor & Francis Ltd WOS:000750905700001				COVID-19 pandemic; China; health code apps; privacy; Privacy; skills; social credit system; trust
4JNZ39V8	journalArticle		Goldberger, Nehama; Bergman-Levy, Tal; Haklai, Ziona; Yoffe, Rinat; Davidson, Michael; Susser, Ehud; Levi, Linda; Elhasid, Tal; Weiser, Mark	COVID-19 and severe mental illness in Israel: testing, infection, hospitalization, mortality and vaccination rates in a countrywide study	Molecular Psychiatry		1359-4184	10.1038/s41380-022-01562-2		Previous studies on psychiatric patients infected with COVID-19 have reported a more severe course of disease and higher rates of mortality compared with the general population. This cohort study linked Israeli national databases including all individuals ever hospitalized for a psychiatric disorder (cases), and COVID-19 testing, infection, hospitalization, mortality, and vaccinations, between Ma…		2022/9/20 11:15	2022/9/20 11:15							Mol. Psychiatr.								English							Place: London Publisher: Springernature WOS:000785592600002				risk; health; diagnoses; psychiatric-disorders; psychotic disorders; schizophrenia
2CBR2KH4	journalArticle		Liu, Meiheng; Shi, Leiyu; Chen, Haiqian; Wang, Xiaohan; Yang, Manfei; Jiao, Jun; Yang, Junyan; Sun, Gang	Comparison Between China and Brazil in the Two Waves of COVID-19 Prevention and Control	Journal of Epidemiology and Global Health		2210-6006	10.1007/s44197-022-00036-6		Objective This study analyzes the effectiveness of COVID-19 prevention and control in China and Brazil from the perspectives of policy and meteorological conditions, and provides experience for epidemic prevention and control. Methods This study collects data on meteorological conditions, vaccination and mutant strains in the two countries to analyze the reasons for the differences in epidemic st…		2022/9/20 11:15	2022/9/20 11:15							J. Epidemiol. Glob. Health								English							Place: London Publisher: Springernature WOS:000775711700001				covid-19; impact; Containment strategy; Meteorological factor; Mitigation strategy; Policy evaluation
R28DX9D4	journalArticle	2022	Alshabi, Ali Mohamed; Shaikh, Ibrahim Ahmed; Alqahtani, Yahya S.; Mannasaheb, Basheerahmed Abdulaziz	Knowledge, Attitudes, Practices, and Use of Herbal Supplements as Effective Constituents Against COVID-19 Among Undergraduate Pharmacy Students of Najran University: A College Based-Cross Sectional Study in Saudi Arabia	Latin American Journal of Pharmacy		0326-2383			COVID-19 pandemic has infected more than 208 million people and accounted for more than 4.5 million deaths worldwide. In our present study, Najran university (NU) students' knowledge, attitude and practice (KAP) towards COVID-19 was assessed using twenty, ten and eight-item scale questions respectively. Similarly, use of herbal and nutritional supplements to protect and cure against COVID-19 infe…	2022	2022/9/20 11:15	2022/9/20 11:15		214-223		1	41		Lat. Am. J. Pharm.								English							Place: La Plata Publisher: Colegio Farmaceuticos Provincia De Buenos Aires WOS:000746500400007				covid-19; Saudi Arabia; students; herbal supplement; Najran University
FVIC7H9E	journalArticle	2022	Torres-Estrella, Carlos U.; del Rocio Reyes-Montes, Maria; Duarte-Escalante, Esperanza; Sierra Martinez, Monica; Guadalupe Frias-De-Leon, Maria; Acosta-Altamirano, Gustavo	Vaccines Against COVID-19: A Review	Vaccines			10.3390/vaccines10030414		As a result of the COVID-19 pandemic, various joint efforts have been made to support the creation of vaccines. Different projects have been under development, of which some are in the clinical evaluation stage and others in are in phase III with positive results. The aim of this paper was to describe the current situation of the development and production of vaccines available to the population …	Mar-22	2022/9/20 11:15	2022/9/20 11:15		414		3	10		Vaccines								English							Place: Basel Publisher: Mdpi WOS:000774345000001				covid-19; SARS-CoV-2; vaccines; efficacy; immunogenicity; vector; immunity; cellular immunity; humoral immunity
KCDEZ7I3	journalArticle	2022	Grabowski, Frederic; Kochanczyk, Marek; Lipniacki, Tomasz	The Spread of SARS-CoV-2 Variant Omicron with a Doubling Time of 2.0-3.3 Days Can Be Explained by Immune Evasion	Viruses-Basel			10.3390/v14020294		Omicron, the novel highly mutated SARS-CoV-2 Variant of Concern (VOC, Pango lineage B.1.1.529) was first collected in early November 2021 in South Africa. By the end of November 2021, it had spread and approached fixation in South Africa, and had been detected on all continents. We analyzed the exponential growth of Omicron over four-week periods in the two most populated of South Africa's provin…	Feb-22	2022/9/20 11:15	2022/9/20 11:15		294		2	14		Viruses-Basel								English							Place: Basel Publisher: Mdpi WOS:000762049200001				SARS-CoV-2; COVID-19 pandemic; Omicron variant; genome sequencing; mutation
KWRQPHA3	journalArticle	2022	Tan, Felicia S. C.; Kabir, Mohammad E.; Bhandari, Sunil	Acute interstitial nephritis after COVID-19 vaccination	Bmj Case Reports			10.1136/bcr-2021-246841		A woman in her 70s presented to the hospital being generally unwell 8 days following the first dose of the AstraZeneca COVID-19 vaccination. She was in stage III acute kidney injury (AKI) with hyperkalaemia and metabolic acidosis. Urinalysis showed haematoproteinuria. Renal immunology screen was negative. She subsequently underwent two renal biopsies. The second biopsy showed features consistent …	May-22	2022/9/20 11:15	2022/9/20 11:15		e246841		5	15		BMJ Case Rep.								English							Place: London Publisher: Bmj Publishing Group WOS:000798758200010				covid-19; diagnosis; Immunological products and vaccines; Unwanted effects; Acute renal failure; adverse reactions; involvement; Renal medicine; renal-failure
2L4TKRA5	journalArticle	2022	Di Mauro, Paola; La Mantia, Ignazio; Cocuzza, Salvatore; Sciancalepore, Pasqua Irene; Rasa, Deborak; Maniaci, Antonino; Ferlito, Salvatore; Tundo, Isabella; Anzivino, Roberta	Acute Vertigo After COVID-19 Vaccination: Case Series and Literature Review	Frontiers in Medicine			10.3389/fmed.2021.790931		Objective: The aim of this study was to present some cases of acute vertigo potentially related to the coronavirus disease 2019 (COVID-19) vaccine and review the available literature about cochleovestibular dysfunction after the COVID-19 vaccination.Methods: In the period from May to July 2021, we evaluated 33 patients (mean age 54.3 +/- 14.1) with "acute vertigo" post COVID-19 vaccination. A det…	2022/1/6	2022/9/20 11:15	2022/9/20 11:15		790931			8		Front. Med.								English							Place: Lausanne Publisher: Frontiers Media Sa WOS:000745972000001				covid-19; vaccine; acute vertigo; central vertigo; dizziness; ear; HINTS examination; peripheral vertigo; sensorineural hearing-loss; tinnitus
W6XSBX6K	journalArticle	2022	Babatunde, Olaniyan Akintunde; Olatunji, Muideen Babatunde; Omotajo, Olugbade Robertson; Ikwunne, Olukorede Ifedolapo; Babatunde, Adekunbi Mofoyeke; Nihinlola, Eunice Titilayo; Patrick, Grace Funmilayo; Dairo, David Magbagbeola	Impact of COVID-19 on routine immunization in Oyo State, Nigeria: trend analysis of immunization data in the pre- and post-index case period; 2019-2020	Pan African Medical Journal			10.11604/pamj.2022.41.54.28575		Introduction: the response to COVID-19 pandemic has posed new obstacles to the fragile health system, most especially in the area of vaccination across much of Africa. As the response to the pandemic intensifies through the application of non-pharmacologic interventions as well as enforcement of the lockdowns across African cities, there is a significant risk that more children will miss out on l…	2022/1/20	2022/9/20 11:15	2022/9/20 11:15		54			41		Pan Afr. Med. J.								English							Place: Kampala Publisher: African Field Epidemiology Network-Afenet WOS:000788008000005				covid-19; index case; Nigeria; routine immunization
HSHLM3HN	journalArticle	2022	Zhou, Tongqing; Wang, Lingshu; Misasi, John; Pegu, Amarendra; Zhang, Yi; Harris, Darcy R.; Olia, Adam S.; Talana, Chloe Adrienna; Yang, Eun Sung; Chen, Man; Choe, Misook; Shi, Wei; Teng, I.-Ting; Creanga, Adrian; Jenkins, Claudia; Leung, Kwanyee; Liu, Tracy; Stancofski, Erik-Stephane D.; Stephens, Tyler; Zhang, Baoshan; Tsybovsky, Yaroslav; Graham, Barney S.; Mascola, John R.; Sullivan, Nancy J.;…	Structural basis for potent antibody neutralization of SARS-CoV-2 variants including B.1.1.529	Science		0036-8075	10.1126/science.abn8897		The rapid spread of the severe acute respiratory syndrome coronavirus 2 (SARS-CoV-2) B.1.1.529 (Omicron) variant and its resistance to neutralization by vaccinee and convalescent sera are driving a search for monoclonal antibodies with potent neutralization. To provide insight into effective neutralization, we determined cryo-electron microscopy structures and evaluated receptor binding domain (R…	2022/4/22	2022/9/20 11:15	2022/9/20 11:15		369-+		6591	376		Science								English							Place: Washington Publisher: Amer Assoc Advancement Science WOS:000788553700033				spike; cryo-em structure; receptor-binding domain
N2XTZD65	journalArticle	2022	Magnus, Maria C.; Ortqvist, Anne K.; Dahlqwist, Elisabeth; Ljung, Rickard; Skar, Fredrik; Oakley, Laura; Macsali, Ferenc; Pasternak, Bjorn; Gjessing, Hakon K.; Haberg, Siri E.; Stephansson, Olof	Association of SARS-CoV-2 Vaccination During Pregnancy With Pregnancy Outcomes	Jama-Journal of the American Medical Association		0098-7484	10.1001/jama.2022.3271		IMPORTANCE Data about the safety of vaccines against SARS-CoV-2 during pregnancy are limited. OBJECTIVE To examine the risk of adverse pregnancy outcomes after vaccination against SARS-CoV-2 during pregnancy. DESIGN, SETTING, AND PARTICIPANTS This registry-based retrospective cohort study included 157 521 singleton pregnancies ending after 22 gestational weeks from January 1, 2021, until January …	2022/4/19	2022/9/20 11:15	2022/9/20 11:15		1469-1477		15	327		JAMA-J. Am. Med. Assoc.								English							Place: Chicago Publisher: Amer Medical Assoc WOS:000772988500003
KEVW6TYG	journalArticle	2022	Stein, Michal; Ashkenazi-Hoffnung, Liat; Greenberg, David; Dalal, Ilan; Livni, Gilat; Chapnick, Gil; Stein-Zamir, Chen; Ashkenazi, Shai; Hecht-Sagie, Lior; Grossman, Zachi	The Burden of COVID-19 in Children and Its Prevention by Vaccination: A Joint Statement of the Israeli Pediatric Association and the Israeli Society for Pediatric Infectious Diseases	Vaccines			10.3390/vaccines10010081		As of October 2021, SARS-CoV-2 infections were reported among 512,613 children and adolescents in Israel (~33% of all COVID-19 cases). The 5-11-year age group accounted for about 43% (223,850) of affected children and adolescents. In light of the availability of the Pfizer-BioNTech BNT162b2 vaccine against COVID-19 for children aged 5-11 years, we aimed to write a position paper for pediatricians…	Jan-22	2022/9/20 11:15	2022/9/20 11:15		81		1	10		Vaccines								English							Place: Basel Publisher: Mdpi WOS:000746084000001				covid-19; united-states; vaccine; safety; sars-cov-2; transmission; children; efficacy; multicenter; myocarditis; outbreaks; adolescents; care facilities; risk-benefit; syndrome coronavirus 2
KMS5FKVA	journalArticle		Laforet, Priscila E.; Basch, Corey H.; Tang, Hao	Understanding the content of COVID-19 vaccination and pregnancy videos on YouTube: An analysis of videos published at the start of the vaccine rollout	Human Vaccines & Immunotherapeutics		2164-5515	10.1080/21645515.2022.2066935		Over 2 years into the COVID-19 pandemic, information on the safety and efficacy of COVID-19 vaccination, particularly for people in high-risk populations, has become a popular topic of discussion. The purpose of this study was to analyze the content and characteristics of YouTube videos related to COVID-19 vaccination and pregnancy. The 50 most viewed English language videos on pregnancy and COVI…		2022/9/20 11:15	2022/9/20 11:15							Human Vaccines Immunother.								English							Place: Philadelphia Publisher: Taylor & Francis Inc WOS:000790651400001				covid-19; pregnancy; vaccination; health; information; misinformation; social media; women; YouTube
M9KBYCHM	journalArticle	2022	Fell, Deshayne B.; Dhinsa, Tavleen; Alton, Gillian D.; Torok, Eszter; Dimanlig-Cruz, Sheryll; Regan, Annette K.; Sprague, Ann E.; Buchan, Sarah A.; Kwong, Jeffrey C.; Wilson, Sarah E.; Haberg, Siri E.; Gravel, Christopher A.; Wilson, Kumanan; El-Chaar, Darine; Walker, Mark C.; Barrett, Jon; MacDonald, Shannon E.; Okun, Nannette; Shah, Prakesh S.; Dougan, Shelley D.; Dunn, Sandra; Bisnaire, Lise	Association of COVID-19 Vaccination in Pregnancy With Adverse Peripartum Outcomes	Jama-Journal of the American Medical Association		0098-7484	10.1001/jama.2022.4255		IMPORTANCE There is limited comparative epidemiological evidence on outcomes associated with COVID-19 vaccination during pregnancy; monitoring pregnancy outcomes in large populations is required. OBJECTIVE To evaluate peripartum outcomes following COVID-19 vaccination during pregnancy. DESIGN, SETTING, AND PARTICIPANTS Population-based retrospective cohort study in Ontario, Canada, using a birth …	2022/4/19	2022/9/20 11:15	2022/9/20 11:15		1478-1487		15	327		JAMA-J. Am. Med. Assoc.								English							Place: Chicago Publisher: Amer Medical Assoc WOS:000772988500004				safety; influenza vaccination; acellular pertussis; birth; spontaneous-abortion
CYQRLNDT	journalArticle	2022	Wratil, Paul R.; Stern, Marcel; Priller, Alina; Willmann, Annika; Almanzar, Giovanni; Vogel, Emanuel; Feuerherd, Martin; Cheng, Cho-Chin; Yazici, Sarah; Christa, Catharina; Jeske, Samuel; Lupoli, Gaia; Vogt, Tim; Albanese, Manuel; Mejias-Perez, Ernesto; Bauernfried, Stefan; Graf, Natalia; Mijocevic, Hrvoje; Vu, Martin; Tinnefeld, Kathrin; Wettengel, Jochen; Hoffmann, Dieter; Muenchhoff, Maximilia…	Three exposures to the spike protein of SARS-CoV-2 by either infection or vaccination elicit superior neutralizing immunity to all variants of concern	Nature Medicine		1078-8956	10.1038/s41591-022-01715-4		Infection-neutralizing antibody responses after severe acute respiratory syndrome coronavirus 2 (SARS-CoV-2) infection or coronavirus disease 2019 vaccination are an essential component of antiviral immunity. Antibody-mediated protection is challenged by the emergence of SARS-CoV-2 variants of concern (VoCs) with immune escape properties, such as omicron (B.1.1.529), which is rapidly spreading wo…	Mar-22	2022/9/20 11:15	2022/9/20 11:15		496-+		3	28		Nat. Med.								English							Place: Berlin Publisher: Nature Portfolio WOS:000770060800001				antibodies; breadth; maturation; potency
RIDQV9GK	journalArticle	2022	Mahalingam, Gokulnath; Rachamalla, Hari Krishnareddy; Arjunan, Porkizhi; Periyasami, Yogapriya; Salma, M.; Thangavel, Saravanabhavan; Mohankumar, Kumarasamypet M.; Moorthy, Mahesh; Velayudhan, Shaji R.; Srivastava, Alok; Marepally, Srujan	Optimization of SARS-CoV-2 Pseudovirion Production in Lentivirus Backbone With a Novel Liposomal System	Frontiers in Pharmacology			10.3389/fphar.2022.840727		Due to the fast mutating nature of severe acute respiratory syndrome coronavirus 2 (SARS-CoV-2), the development of novel therapeutics, vaccines, and evaluating the efficacies of existing one's against the mutated strains is critical for containing the virus. Pseudotyped SARS-CoV-2 viruses are proven to be instrumental in evaluating the efficiencies of therapeutics, owing to their ease in applica…	2022/3/25	2022/9/20 11:15	2022/9/20 11:15		840727			13		Front. Pharmacol.								English							Place: Lausanne Publisher: Frontiers Media Sa WOS:000792384200001				covid-19; vaccines; entry; liposomes; variants; convalescent plasma therapy; lentivirus; pseudoviral neutralization; SARS-CoV-2 (COVID-19); spike-protein; transfection
8DAHGA5Z	journalArticle	2022	Kostev, Karel; Beinker, Philipp; Weber, Kerstin; Bohlken, Jens; Tanislav, Christian	Demographic and clinical characteristics of primary care patients vaccinated against COVID-19 in spring 2021	International Journal of Clinical Pharmacology and Therapeutics		0946-1965	10.5414/CP204178		Aim: The aim of this study was to examine the age distribution and comorbidities of individuals vaccinated in primary care practices in April and May 2021. Materials and methods: The analysis was based on data from the IQVIA Disease Analyzer database and included 245,948 patients who received their first COVID-19 vaccination from one of 820 family medicine practices in April or May 2021. Results:…	Mar-22	2022/9/20 11:15	2022/9/20 11:15		136-139		3	60		Int. J. Clin. Pharmacol. Ther.								English							Place: Deisenhofen-Muenchen Publisher: Dustri-Verlag Dr Karl Feistle WOS:000769111600003				covid-19; general practice; priority list
T5E7LVDT	journalArticle	2022	Braun, Peter	Effect of lockdown and vaccination on the course of the COVID-19 pandemic in Germany	International Journal of Clinical Pharmacology and Therapeutics		0946-1965	10.5414/CP204191		Background: Incidence(t), derived from observational data published by the Robert Koch Institute, Berlin, Germany, is a commonly used parameter to illustrate the course of the COVID-19 pandemic in Germany. The parameter t(alpha)(t), equivalent to the doubling-time of the virus described by our research group, has also been useful in this regard. Aims: To identify and compare parameters suitable f…	Mar-22	2022/9/20 11:15	2022/9/20 11:15		125-135		3	60		Int. J. Clin. Pharmacol. Ther.								English							Place: Deisenhofen-Muenchen Publisher: Dustri-Verlag Dr Karl Feistle WOS:000769111600002				vaccination; coronavirus; COVID-19 pandemic; incidence; Germany; interventional measures; lockdown; modified Bateman SIZ model
RXRI2VE4	journalArticle	2022	Allington, Daniel; McAndrew, Siobhan; Duffy, Bobby; Moxham-Hall, Vivienne	Trust and experiences of National Health Service healthcare do not fully explain demographic disparities in coronavirus vaccination uptake in the UK: a cross-sectional study	Bmj Open		2044-6055	10.1136/bmjopen-2021-053827		Objective To test whether demographic variation in vaccine hesitancy can be explained by trust and healthcare experiences. Design Cross-sectional study. Setting Data collected online in April 2021. Participants Data were collected from 4885 UK resident adults, of whom 3223 had received the invitation to be vaccinated against the novel coronavirus and could therefore be included in the study. 1629…	Mar-22	2022/9/20 11:15	2022/9/20 11:15		e053827		3	12		BMJ Open								English							Place: London Publisher: Bmj Publishing Group WOS:000771968100020				covid-19; attitudes; beliefs; hesitancy; public health
GYREV39W	journalArticle	2022	Margolin, Emmanuel; Verbeek, Matthew; de Moor, Warren; Chapman, Ros; Meyers, Ann; Schaefer, Georgia; Williamson, Anna-Lise; Rybicki, Edward	Investigating Constraints Along the Plant Secretory Pathway to Improve Production of a SARS-CoV-2 Spike Vaccine Candidate	Frontiers in Plant Science		1664-462X	10.3389/fpls.2021.798822		Given the complex maturation requirements of viral glycoproteins and the challenge they often pose for expression in plants, the identification of host constraints precluding their efficient production is a priority for the molecular farming of vaccines. Building on previous work to improve viral glycoprotein production in plants, we investigated the production of a soluble SARS-CoV-2 spike compr…	2022/1/4	2022/9/20 11:15	2022/9/20 11:15		798822			12		Front. Plant Sci.								English							Place: Lausanne Publisher: Frontiers Media Sa WOS:000745181800001				vaccine; safety; immunogenicity; degradation; adults; chaperone; glycoprotein; molecular farming; processing; protease
5DTK5SRL	journalArticle	2022	AlQudari, Elham A.; Alabdan, Lulwah; Alkhathami, Abdulla A.; Alotaibi, Mohammed D.; Alhamzi, Hanan A.	Adult-Onset Still's Disease After the ChAdOx1 nCoV-19 Vaccine	Cureus Journal of Medical Science			10.7759/cureus.21279		Adult-onset Still's disease (AOSD) is a rare autoimmune disorder without clear etiology. It is known that genetic and infectious causes trigger diseases. AOSD cases have been reported after coronavirus disease 2019 (COVID-19) infection and post influenza vaccine. Here, we report this challenging case of adult-onset Still's disease in a patient who recently received the ChAdOx1 nCoV-19 vaccine (Ox…	2022/1/15	2022/9/20 11:15	2022/9/20 11:15		e21279		1	14		Cureus J Med Sci								English							Place: Palo Alto Publisher: Cureus Inc WOS:000745301600013				covid-19; vaccine; autoimmune disease; adult-onset still's disease; covid 19; covid 19 side effect
QPC96BDP	journalArticle	2022	Avivi, Irit; Luttwak, Efrat; Saiag, Esther; Halperin, Tami; Haberman, Shira; Sarig, Ariel; Levi, Sivan; Aharon, Anat; Herishanu, Yair; Perry, Chava	BNT162b2 mRNA COVID-19 vaccine booster induces seroconversion in patients with B-cell non-Hodgkin lymphoma who failed to respond to two prior vaccine doses	British Journal of Haematology		0007-1048	10.1111/bjh.18029		This prospective study evaluated seroconversion rates in response to BNT162b2 (Pfizer-BioNTech) COVID-19 vaccine booster in 44 B-cell non-Hodgkin lymphoma (B-NHL) patients who failed to respond to two prior doses [42 previously exposed to anti-CD20 monoclonal antibodies (moAbs) including 13 under maintenance treatment]. Seroconversion was obtained in 29.5% of the patients. Longer time from last a…	Mar-22	2022/9/20 11:15	2022/9/20 11:15		1329-1333		6	196		Br. J. Haematol.								English							Place: Hoboken Publisher: Wiley WOS:000746439900001				efficacy; BNT162b2; B-cell non-Hodgkin lymphoma; COVID-19 vaccine booster; humoral response; reconstitution; rituximab treatment; single
XSXWMQMQ	journalArticle	2022	Alfaro, Tania; Batiste, Alexis; Duque, Alejandra; Felix-Okoroji, Blessing; Marroquin, Maricarmen; Martinez, Riley; O'Neal, Carli; Osazuwa, Nancy; Paul, Ashly; Robinson, Karina; Williams, Eunique	The Effect of Vaccine Hesitancy on Racial and Ethnic Minority Children During the COVID-19 Pandemic	Pediatric Annals		0090-4481	10.3928/19382359-20220216-01		The coronavirus disease 2019 (COVID-19) outbreak has ravaged the world, with numerous cases disproportionally attributed to the United States due to vaccine hesitancy. One vulnerable group that has been affected by vaccine hesitancy is the pediatric population, particularly those in racial and ethnic minority groups. To improve health outcomes and vaccination rates, we must first understand the f…	Mar-22	2022/9/20 11:15	2022/9/20 11:15		E107-E111		3	51		Pediatr. Ann.								English							Place: Thorofare Publisher: Slack Inc WOS:000772694100005				united-states; health
5P85XDSU	journalArticle		Farina, Antonio; Falso, Silvia; Cornacchini, Sara; Spagni, Gregorio; Monte, Gabriele; Mariottini, Alice; Massacesi, Luca; Barilaro, Alessandro; Evoli, Amelia; Damato, Valentina	Safety and tolerability of SARS-Cov-2 vaccination in patients with myasthenia gravis: A multicenter experience	European Journal of Neurology		1351-5101	10.1111/ene.15348		Background and purpose During the COVID-19 pandemic, myasthenia gravis (MG) patients have been identified as subjects at high risk of developing severe COVID-19, and thus were offered vaccination with priority. The lack of direct data on the safety and tolerability of SARS-CoV-2 vaccines in MG have contributed to vaccine hesitancy. To address this issue, the safety and tolerability of SARS-CoV-2 …		2022/9/20 11:15	2022/9/20 11:15							Eur. J. Neurol.								English							Place: Hoboken Publisher: Wiley WOS:000783000700001				vaccination; sars-cov-2; myasthenia gravis
PTLCB66K	journalArticle	2022	Hurst, Daniel J.; Potter, Jordan; Padilla, Luz A.	Organ transplant and Covid-19 vaccination: Considering the ethics of denying transplant to unvaccinated patients	Clinical Transplantation		0902-0063	10.1111/ctr.14589		Recently, a number of organ transplant centers in the United States have proposed to only allow patients who have received the Covid-19 vaccination to be active on their transplant waiting list. This raises numerous ethical issues. This analysis utilizes current empirical data and the guidelines on the ethics of organ allocation published by the Organ Procurement and Transplant Network to guide o…	May-22	2022/9/20 11:15	2022/9/20 11:15		e14589		5	36		Clin. Transplant.								English							Place: Hoboken Publisher: Wiley WOS:000744678300001				ethics; Covid-19; transplant
LHNMWVDI	journalArticle	2022	Wagschal, Uwe	The influence of democracy, governance and government policies on the COVID-19 pandemic mortality(sic)(sic)(sic)Palabras clave	European Policy Analysis			10.1002/epa2.1146		The paper analyses the determinants of mortality during the Corona pandemic. In a first step, possible causes are subjected to a global comparison.The focus is on political, institutional, economic, demographic and health policy factors. It is shown that, contrary to the assumption, democratic countries have a higher Covid-19 mortality. In a second step, the developed democracies are then analyse…	May-22	2022/9/20 11:15	2022/9/20 11:15		231-247		2	8		Eur. Policy Anal.								English							Place: Hoboken Publisher: Wiley WOS:000792819900001				governance; public policy; covid 19; democracy; sustainable governance indicators
78K6EUGL	journalArticle	2022	Zhang, Ye; Wang, Ruixin; He, Chunyan; Zhang, Yu-Fang; Luo, Zhongrui; Luo, Jia; Chen, Sisi; Jin, Yu; Xie, Bowen; Liu, Ye	Amantadine-assembled nanostimulator enhances dimeric RBD antigen-elicited cross-neutralization against SARS-CoV-2 strains	Nano Today		1748-0132	10.1016/j.nantod.2022.101393		There is an urgent need to develop new vaccination strategies to elevate the cross-neutralization against different SARS-CoV-2 strains. In this study, we construct the spherical amantadine-assembled nanostimulator (AAS). Amantadine as immunostimulating molecules are displayed on the outermost layer of AAS. Molecular mechanism analysis reveals that AAS can activate RIG-I-like receptor (RLR) signal…	Apr-22	2022/9/20 11:15	2022/9/20 11:15		101393			43		Nano Today								English							Place: Oxford Publisher: Elsevier Sci Ltd WOS:000772807400001				covid-19; SARS-CoV-2; safety; interferon; vaccines; cells; Amantadine assembly; Cross-neutralization; Dimeric RBD antigen; hydrochloride; pharmacokinetics; RLR Signaling pathway
BIVVAJQB	journalArticle	2022	Yang, Juan; Liao, Yuting; Hua, Qianhui; Lv, Huakun	A Survey of Awareness of COVID-19 Knowledge, Willingness and Influencing Factors of COVID-19 Vaccination	Vaccines			10.3390/vaccines10040524		New vaccines are being developed in response to the coronavirus disease 2019 (COVID-19) pandemic. Vaccination provides a crucial preventive approach for managing COVID-19. We investigated adults' willingness to take COVID-19 vaccines in the Zhejiang province, and their cognitions regarding COVID-19, when the COVID-19 vaccine is authorized under Emergency Use Administration. An online survey was c…	Apr-22	2022/9/20 11:15	2022/9/20 11:15		524		4	10		Vaccines								English							Place: Basel Publisher: Mdpi WOS:000786747900001				covid-19; SARS-CoV-2; knowledge; hesitancy; influencing factors; emergence use administration; vaccine acceptance
ZDJDXVMF	journalArticle	2022	Dong, Sujie; Kong, Ning; Zhang, Yu; Li, Youwen; Sun, Dage; Qin, Wenzhen; Zhai, Huanjie; Zhai, Xueying; Yang, Xinyu; Ye, Chenqian; Ye, Manqing; Liu, Changlong; Yu, Lingxue; Zheng, Hao; Tong, Wu; Yu, Hai; Zhang, Wen; Tong, Guangzhi; Shan, Tongling	TARDBP Inhibits Porcine Epidemic Diarrhea Virus Replication through Degrading Viral Nucleocapsid Protein and Activating Type I Interferon Signaling	Journal of Virology		0022-538X	10.1128/jvi.00070-22		PEDV refers to the highly contagious enteric coronavirus that has quickly spread globally and generated substantial financial damage to the global swine industry. During virus infection, the host regulates the innate immunity and autophagy process to inhibit virus infection. In global infection and serious morbidity and mortality, porcine epidemic diarrhea virus (PEDV) has been regarded as a drea…	2022/5/25	2022/9/20 11:15	2022/9/20 11:15				10	96		J. Virol.								English							Place: Washington Publisher: Amer Soc Microbiology WOS:000791527000003				infection; gene; autophagy; functional implications; hepatitis-b-virus; ifn-i; modulation; nf-kappa-b; nucleocapsid protein; pathways; pedv; receptors; selective autophagy; tardbp; tdp-43
MAJJEFWK	journalArticle	2022	Zaratin, Paola; Banwell, Brenda; Coetzee, Timothy; Comi, Giancarlo; Feinstein, Anthony; Hyde, Robert; Salvetti, Marco; Smith, Kathryn	Researching COVID-19 in progressive MS requires a globally coordinated, multi-disciplinary and multi-stakeholder approach-perspectives from the International Progressive MS Alliance	Multiple Sclerosis Journal-Experimental Translational and Clinical			10.1177/20552173221099181		Background The COVID-19 pandemic has reinforced the importance of research for the health of our society and highlighted the need for stakeholders of the health research and care continuum to form a collaborative and interdependent ecosystem. Objective With the world still reeling from waves of the COVID-19 pandemic and adapting to the vaccine rollout at widely different rates, the International …	Apr-22	2022/9/20 11:15	2022/9/20 11:15		2.05522E+16		2	8		Mult. Scler. J. Exp. Transl. Clin.								English							Place: Thousand Oaks Publisher: Sage Publications Inc WOS:000797464200001				COVID-19 pandemic; Multiple sclerosis; prevalence; people; multi-stakeholder agendas; outcomes; progression; sclerosis
2FP2F3F3	journalArticle	2022	Li, Chuan-Xing; Gao, Jing; Zhang, Zicheng; Chen, Lu; Li, Xun; Zhou, Meng; Wheelock, Asa M.	Multiomics integration-based molecular characterizations of COVID-19	Briefings in Bioinformatics		1467-5463	10.1093/bib/bbab485		The coronavirus disease 2019 (COVID-19) pandemic, caused by the severe acute respiratory syndrome coronavirus 2 (SARS-CoV-2), rapidly became a global health challenge, leading to unprecedented social and economic consequences. The mechanisms behind the pathogenesis of SARS-CoV-2 are both unique and complex. Omics-scale studies are emerging rapidly and offer a tremendous potential to unravel the p…	2022/1/17	2022/9/20 11:15	2022/9/20 11:15		bbab485		1	23		Brief. Bioinform.								English							Place: Oxford Publisher: Oxford Univ Press WOS:000763000800187				covid-19; severity; complications; molecular characteristics; multiomics integration; omics; outcome; single-cell omics
BHRSGCZ2	journalArticle		Voss, Claire; Shorter, Phoebe; Weatrowski, Grace; Mueller-Coyne, Jessica; Turner, Katherine	A comparison of anxiety levels before and during the COVID-19 pandemic	Psychological Reports		0033-2941	10.1177/00332941221093250		The COVID-19 Pandemic upended the lives of nearly everyone worldwide, and recent studies have reported higher rates of anxiety, depression, and other mental health problems. Using a repeated crosssectional design, the current study compares anxiety levels from a representative sample of college students prior-to and during the COVID-19 Pandemic. Additionally, differences in anxiety prior to and f…		2022/9/20 11:15	2022/9/20 11:15		3.32941E+14					Psychol. Rep.								English							Place: Thousand Oaks Publisher: Sage Publications Inc WOS:000795706600001				covid-19; pandemic; united-states; vaccine; stress; anxiety; cognitive-behavioral therapy; college students; depression; mental-health; near-infrared spectroscopy; state anxiety; state-trait anxiety; suicidal ideation; trait anxiety; us college-students; vaccine hesitancy
A6JIUGMI	journalArticle	2022	Kazmer, Seth T.; Hartel, Gunter; Robinson, Harley; Richards, Renee S.; Yan, Kexin; van Hal, Sebastiaan J.; Chan, Raymond; Hind, Andrew; Bradley, David; Zieschang, Fabian; Rawle, Daniel J.; Le, Thuy T.; Reid, David W.; Suhrbier, Andreas; Hill, Michelle M.	Pathophysiological Response to SARS-CoV-2 Infection Detected by Infrared Spectroscopy Enables Rapid and Robust Saliva Screening for COVID-19	Biomedicines			10.3390/biomedicines10020351		Fourier transform infrared (FTIR) spectroscopy provides a (bio)chemical snapshot of the sample, and was recently used in proof-of-concept cohort studies for COVID-19 saliva screening. However, the biological basis of the proposed technology has not been established. To investigate underlying pathophysiology, we conducted controlled infection experiments on Vero E6 cells in vitro and K18-hACE2 mic…	Feb-22	2022/9/20 11:15	2022/9/20 11:15		351		2	10		Biomedicines								English							Place: Basel Publisher: Mdpi WOS:000778579900001				rna; COVID-19 pandemic; severity; atr-ftir spectroscopy; fourier transform infrared spectroscopy; ftir; kallikrein
UM5MNWPB	journalArticle	2022	Beck, Evan J.; Hsieh, Yu-Hsiang; Fernandez, Reinaldo E.; Dashler, Gaby; Egbert, Emily R.; Truelove, Shawn A.; Garliss, Caroline; Wang, Richard; Bloch, Evan M.; Shrestha, Ruchee; Blankson, Joel; Cox, Andrea L.; Manabe, Yukari C.; Kickler, Thomas; Rothman, Richard E.; Redd, Andrew D.; Tobian, Aaron A. R.; Milstone, Aaron M.; Quinn, Thomas C.; Laeyendecker, Oliver	Differentiation of Individuals Previously Infected with and Vaccinated for SARS-CoV-2 in an Inner-City Emergency Department	Journal of Clinical Microbiology		0095-1137	10.1128/jcm.02390-21		Emergency departments (EDs) can serve as surveillance sites for infectious diseases. The objective of this study was to determine the burden of severe acute respiratory syndrome coronavirus 2 (SARS-CoV-2) infection and to monitor the prevalence of vaccination against coronavirus disease 2019 (COVID-19) among patients attending an urban ED in Baltimore City. Emergency departments (EDs) can serve a…	2022/3/16	2022/9/20 11:15	2022/9/20 11:15		e02390-21		3	60		J. Clin. Microbiol.								English							Place: Washington Publisher: Amer Soc Microbiology WOS:000778541200018				covid-19; united-states; strategies; antibodies; virus; hiv; COVID-19 vaccination prevalence; emergency department; factors associated with SARS-CoV-2 infection; seroprevalence of SARS-CoV-2 antibody
H74F3S9J	journalArticle	2022	Lim, Sing Mei; Cheng, Hoi Lok; Jia, Huan; Kongsuphol, Patthara; Shunmuganathan, Bhuvaneshwari; Chen, Ming Wei; Ng, Say Yong; Gao, Xiaohong; Turaga, Shuvan Prashant; Heussler, Sascha P.; Somani, Jyoti; Sengupta, Sharmila; Tay, Dousabel M. Y.; McBee, Megan E.; Young, Barnaby E.; MacAry, Paul A.; Sikes, Hadley D.; Preiser, Peter R.	Finger stick blood test to assess postvaccination SARS-CoV-2 neutralizing antibody response against variants	Bioengineering & Translational Medicine			10.1002/btm2.10293		There is clinical need for a quantifiable point-of-care (PoC) SARS-CoV-2 neutralizing antibody (nAb) test that is adaptable with the pandemic's changing landscape. Here, we present a rapid and semi-quantitative nAb test that uses finger stick or venous blood to assess the nAb response of vaccinated population against wild-type (WT), alpha, beta, gamma, and delta variant RBDs. It captures a clinic…	May-22	2022/9/20 11:15	2022/9/20 11:15		e10293		2	7		Bioeng. Transl. Med.								English							Place: Hoboken Publisher: Wiley WOS:000753329600001				SARS-CoV-2; vaccine; cellulose pulldown assay; covid19; humoral response against COVID19 variants; neutralizing antibody; point-of-care test; serology test
FUV2MNK2	journalArticle	2022	Bakasis, Athanasios-Dimitrios; Bitzogli, Kleopatra; Mouziouras, Dimitrios; Pouliakis, Abraham; Roumpoutsou, Maria; Goules, Andreas V.; Androutsakos, Theodoros	Antibody Responses after SARS-CoV-2 Vaccination in Patients with Liver Diseases	Viruses-Basel			10.3390/v14020207		The novel mRNA-based vaccines against SARS-CoV-2 display encouraging safety and efficacy profiles. However, there is a paucity of data regarding their immunogenicity and safety in patients with liver diseases (PWLD), especially in those with cirrhosis. We prospectively assessed anti-SARS-CoV-2 S-spike IgG antibodies and neutralizing activity in fully vaccinated PWLD (n = 87) and controls (n = 40)…	Feb-22	2022/9/20 11:15	2022/9/20 11:15		207		2	14		Viruses-Basel								English							Place: Basel Publisher: Mdpi WOS:000762077600001				SARS-CoV-2; vaccination; infections; cirrhosis; immune dysfunction; immunosuppression; liver diseases
6WRDWC68	journalArticle	2022	Barreiro, Pablo; Carlos Sanz, Juan; San Roman, Jesus; Perez-Abeledo, Marta; Carretero, Mar; Megias, Gregoria; Manuel Vinuela-Prieto, Jose; Ramos, Belen; Canora, Jesus; Javier Martinez-Peromingo, Francisco; Barba, Raquel; Zapatero, Antonio; Javier Candel, Francisco	A Pilot Study for the Evaluation of an Interferon Gamma Release Assay (IGRA) To Measure T-Cell Immune Responses after SARS-CoV-2 Infection or Vaccination in a Unique Cloistered Cohort	Journal of Clinical Microbiology		0095-1137	10.1128/jcm.02199-21		Assessment of T-cell responses to severe acute respiratory syndrome coronavirus 2 (SARS-CoV-2) antigens may be of value to determine long-lasting protection to breakthrough infections or reinfections. Interferon gamma release assay is a validated method to test cellular immunity in mycobacterial infections and has been proposed for patients with SARS-CoV-2 infection or vaccination. Quantitative I…	2022/3/16	2022/9/20 11:15	2022/9/20 11:15		e02199-21		3	60		J. Clin. Microbiol.								English							Place: Washington Publisher: Amer Soc Microbiology WOS:000778541200019				covid-19; SARS-CoV-2; vaccine; serology; immunogenicity; igra; interferon gamma release assay
RKEAH4AQ	journalArticle	2022	Babuadze, George Giorgi; Fausther-Bovendo, Hugues; deLaVega, Marc-Antoine; Lillie, Brandon; Naghibosadat, Maedeh; Shahhosseini, Nariman; Joyce, Michael A.; Saffran, Holly A.; Lorne Tyrrell, D.; Falzarano, Darryl; Senthilkumaran, Chandrika; Christie-Holmes, Natasha; Ahn, Steven; Gray-Owen, Scott D.; Banerjee, Arinjay; Mubareka, Samira; Mossman, Karen; Dupont, Chanel; Pedersen, Jannie; Lafrance, Ma…	Two DNA vaccines protect against severe disease and pathology due to SARS-CoV-2 in Syrian hamsters	Npj Vaccines			10.1038/s41541-022-00461-5		The SARS-CoV-2 pandemic is an ongoing threat to global health, and wide-scale vaccination is an efficient method to reduce morbidity and mortality. We designed and evaluated two DNA plasmid vaccines, based on the pIDV-II system, expressing the SARS-CoV-2 spike gene, with or without an immunogenic peptide, in mice, and in a Syrian hamster model of infection. Both vaccines demonstrated robust immun…	2022/4/26	2022/9/20 11:15	2022/9/20 11:15		49		1	7		npj Vaccines								English							Place: Berlin Publisher: Nature Portfolio WOS:000787769400001
TBWKYXM3	journalArticle	2022	Mooij, Petra; Garcia-Arriaza, Juan; Perez, Patricia; Lazaro-Frias, Adrian; Verstrepen, Babs E.; Boszormenyi, Kinga P.; Mortier, Daniella; Fagrouch, Zahra; Kiemenyi-Kayere, Gwendoline; Niphuis, Henk; Acar, Roja Fidel; Meijer, Lisette; Stammes, Marieke A.; Kondova, Ivanela; Verschoor, Ernst J.; GeurtsvanKessel, Corine H.; de Bruin, Erwin; Sikkema, Reina S.; Luczkowiak, Joanna; Delgado, Rafael; Mont…	Poxvirus MVA Expressing SARS-CoV-2 S Protein Induces Robust Immunity and Protects Rhesus Macaques From SARS-CoV-2	Frontiers in Immunology		1664-3224	10.3389/fimmu.2022.845887		Novel safe, immunogenic, and effective vaccines are needed to control the COVID-19 pandemic, caused by SARS-CoV-2. Here, we describe the safety, robust immunogenicity, and potent efficacy elicited in rhesus macaques by a modified vaccinia virus Ankara (MVA) vector expressing a full-length SARS-CoV-2 spike (S) protein (MVA-S). MVA-S vaccination was well tolerated and induced S and receptor-binding…	2022/3/16	2022/9/20 11:15	2022/9/20 11:15		845887			13		Front. Immunol.								English							Place: Lausanne Publisher: Frontiers Media Sa WOS:000778786300001				covid-19; SARS-CoV-2; infection; responses; vaccine; safety; spike; efficacy; immunogenicity; sars; influenza; vector; challenge; MVA vaccine; nyvac; rhesus macaques
5LKJL5NS	journalArticle	2022	Jafar, Adi; Mapa, Mohammad Tahir; Sakke, Nordin; Dollah, Ramli; Joko, Eko Prayitno; Atang, Colonius; Ahmad, Syahruddin Awang; Hung, Chong Vun; Geogre, Fionna	Vaccine hesitancy in East Malaysia (Sabah): A survey of the national COVID-19 immunisation programme	Geospatial Health		1827-1987			The Malaysian government has introduced the National COVID-19 Immunisation Programme (PICK) as a new mechanism to address the transmission of coronavirus disease 2019 (COVID-19). Unfortunately, the number of PICK registrations is still unsatisfactory and is now even lower. The low level of participation of the Sabah (East Malaysia) population significantly impacts the PICK registrations. Therefor…	2022	2022/9/20 11:15	2022/9/20 11:15		1037			17		Geospatial Health								English							Place: Naples Publisher: Univ Naples Federico Ii WOS:000750818300003				covid-19; vaccine hesitancy; East Malaysia; geographical information system; immunisation programme
NCPDRM2R	journalArticle	2022	Schafer, Alexandra; Martinez, David R.; Won, John J.; Meganck, Rita M.; Moreira, Fernando R.; Brown, Ariane J.; Gully, Kendra L.; Zweigart, Mark R.; Conrad, William S.; May, Samantha R.; Dong, Stephanie; Kalla, Rao; Chun, Kwon; Du Pont, Venice; Babusis, Darius; Tang, Jennifer; Murakami, Eisuke; Subramanian, Raju; Barrett, Kimberly T.; Bleier, Blake J.; Bannister, Roy; Feng, Joy Y.; Bilello, John …	Therapeutic treatment with an oral prodrug of the remdesivir parental nucleoside is protective against SARS-CoV-2 pathogenesis in mice	Science Translational Medicine		1946-6234	10.1126/scitranslmed.abm3410		The coronavirus disease 2019 (COVID-19) pandemic remains uncontrolled despite the rapid rollout of safe and effective severe acute respiratory syndrome coronavirus 2 (SARS-CoV-2) vaccines, underscoring the need to develop highly effective antivirals. In the setting of waning immunity from infection and vaccination, breakthrough infections are becoming increasingly common and treatment options rem…	2022/5/4	2022/9/20 11:15	2022/9/20 11:15		eabm3410		643	14		Sci. Transl. Med.								English							Place: Washington Publisher: Amer Assoc Advancement Science WOS:000794056600005				efficacy
BBCYQBPK	journalArticle	2022	Donmez, Zehranaz; Turhan, Serkan; Karsu, Ozlem; Kara, Bahar Y.; Karasan, Oya	Fair allocation of personal protective equipment to health centers during early phases of a pandemic	Computers & Operations Research		0305-0548	10.1016/j.cor.2021.105690		We consider the problem of allocating personal protective equipment, namely surgical and respiratory masks, to health centers under extremely limited supply. We formulate a multi-objective multi-period non-linear resource allocation model for this problem with the objectives of minimizing the number of infected health workers, the number of infected patients and minimizing a deprivation cost func…	May-22	2022/9/20 11:15	2022/9/20 11:15		105690			141		Comput. Oper. Res.								English							Place: Oxford Publisher: Pergamon-Elsevier Science Ltd WOS:000762974200010				covid-19; model; Pandemic; epidemics; Epsilon-constraint algorithm; Equity; Fairness; Genetic algorithm; Healthcare resource allocation; infectious-disease outbreaks; medical resources; minimize; multiobjective genetic algorithm; Personal protective equipment allocation; resource-allocation; vaccine allocation
4854KZ4X	journalArticle		Reiter-Haas, Markus; Kloesch, Beate; Hadler, Markus; Lex, Elisabeth	Polarization of Opinions on COVID-19 Measures: Integrating Twitter and Survey Data	Social Science Computer Review		0894-4393	10.1177/08944393221087662		Polarization of public opinion is a major issue for societies, as high levels can promote adverse effects such as hostility. The present paper focuses on the polarization of opinions regarding COVID-19 prevention measures in survey data and on Twitter in the German-speaking regions of Germany, Austria, and Switzerland. The level of polarization is measured by dispersion and bimodality in the opin…		2022/9/20 11:15	2022/9/20 11:15		8.94439E+15					Soc. Sci. Comput. Rev.								English							Place: Thousand Oaks Publisher: Sage Publications Inc WOS:000797536800001				attitudes; dynamics; social media; COVID-19 measures; integrating data sources; interdisciplinary research; news; opinion polarization; selective exposure; surveys; twitter
LUNW5E4G	journalArticle		Devi, Priti; Maurya, Ranjeet; Mehta, Priyanka; Shamim, Uzma; Yadav, Aanchal; Chattopadhyay, Partha; Kanakan, Akshay; Khare, Kriti; Vasudevan, Janani Srinivasa; Sahni, Shweta; Mishra, Pallavi; Tyagi, Akansha; Jha, Sujeet; Budhiraja, Sandeep; Tarai, Bansidhar; Pandey, Rajesh	Increased Abundance of Achromobacter xylosoxidans and Bacillus cereus in Upper Airway Transcriptionally Active Microbiome of COVID-19 Mortality Patients Indicates Role of Co-Infections in Disease Severity and Outcome	Microbiology Spectrum		2165-0497	10.1128/spectrum.02311-21		The modulators of severe COVID-19 have emerged as the most intriguing features of SARS-CoV-2 pathogenesis. This is especially true as we are encountering variants of concern (VOC) with increased transmissibility and vaccination breakthroughs. Microbial co-infections are being investigated as one of the crucial factors for exacerbation of disease severity and complications of COVID-19. A key quest…		2022/9/20 11:15	2022/9/20 11:15							Microbiol. Spectr.								English							Place: Washington Publisher: Amer Soc Microbiology WOS:000799830500001				covid-19; infection; sars-cov-2; co-infection; disease outcome; disease sub-phenotype; Holo-Seq; host-pathogen interactions; hybridization; interference; metabolic pathways; nasopharyngeal RNA; pathogen genomics; respiratory virus oligo panel (RVOP); ribosomal-rna content; transcriptionally active microbial isolates
4J4QKZ5H	journalArticle	2022	Lessard, Laura; Hallam, Rena; Drain, Deborah; Ruggiero, Laurie	COVID-19 Vaccination Status and Attitudes of Family Child Care Providers in Delaware, September 2021	Vaccines			10.3390/vaccines10030477		Child care providers, including family child care (FCC) providers, are viewed as trusted sources of information for the parents and families they serve, and their vaccine behavior has been shown to be associated with parent beliefs and behaviors. This study sought to describe the COVID-19 vaccine behaviors and attitudes among FCC providers in Delaware. An online survey was distributed to all lice…	Mar-22	2022/9/20 11:15	2022/9/20 11:15		477		3	10		Vaccines								English							Place: Basel Publisher: Mdpi WOS:000774516500001				covid-19; united-states; vaccination; influenza vaccination; parents; homes; child care
SSWRKZ2P	journalArticle	2022	Zhang, Chuang; Li, Yantong; Cao, Junhai; Wen, Xin	On the mass COVID-19 vaccination scheduling problem	Computers & Operations Research		0305-0548	10.1016/j.cor.2022.105704		The outbreak of COVID-19 dramatically impacts the global economy. Mass COVID-19 vaccination is widely regarded as the most promising way to fight against the pandemic and help return to normal. Many governments have authorized certain types of vaccines for mass vaccination by establishing appointment platforms. Mass vaccination poses a vital challenge to decision-makers responsible for scheduling…	May-22	2022/9/20 11:15	2022/9/20 11:15		105704			141		Comput. Oper. Res.								English							Place: Oxford Publisher: Pergamon-Elsevier Science Ltd WOS:000762974200017				covid-19; model; minimize; algorithms; Appointment scheduling; cost; Logic-based Benders decomposition; machines; makespan; Mass vaccination; Matheuristic; release dates; times; total tardiness
LQ4XTG8T	journalArticle	2022	Shwethashree, M.; Vanmathi, A.; Narayanamurthy, M. R.; Gopi, Arun; Saurish, M. R.; Amoghashree, Arun	Did this pandemic trigger a spike in mothers ' hesitancy over their children's routine immunizations? -A cross sectional study	Clinical Epidemiology and Global Health		2452-0918	10.1016/j.cegh.2022.101023		Back ground: The COVID-19 pandemic has created a lot of disruptions for delivery of health care services like routine immunization. Delayed immunization can lead to outbreak of many vaccine preventable diseases. The current pandemic created confusions and fear among mothers to vaccinate their children. This study was an initiative to understand the struggles faced by them during the pandemic.Obje…	Jun-22	2022/9/20 11:15	2022/9/20 11:15		101023			15		Clin. Epidemiol. Glob. Health								English							Place: New Delhi Publisher: Elsevier - Division Reed Elsevier India Pvt Ltd WOS:000791288200018				covid-19; Immunization; Vaccine hesitancy; Lockdown; Vaccine preventable diseases
JXZC6MYI	journalArticle	2022	Bouhamed, Heni; Hamdi, Monia; Gargouri, Rahma	Covid-19 Patients' Hospital Occupancy Prediction During the Recent Omicron Wave via some Recurrent Deep Learning Architectures	International Journal of Computers Communications & Control		1841-9836	10.15837/ijccc.2022.3.4697		This paper described a suggested model to predict bed occupancy for Covid-19 patients by country during the rapid spread of the Omicron variant. This model can be used to make decisions on the introduction or alleviation of restrictive measures and on the prediction of oxygen and health human resource requirements. To predict Covid-19 hospital occupancy, we tested some recurrent deep learning arc…	Jun-22	2022/9/20 11:15	2022/9/20 11:15		4697		3	17		Int. J. Comput. Commun. Control								English							Place: Bihor Publisher: Ccc Publ-Agora Univ WOS:000795496200008				vaccination; prediction; COVID-19 hospital occupancy levels; Deep Learning; gru
2B8DLZJ5	journalArticle	2022	Blanco, Omar R.; Dorta, Dayami; Hernandez, Carlos A.; Abreu, Daymi; Dominguez, Andy G.; Luna, Yaramis; Valdivia, Onel; Perez-Bernal, Maylin; Tamayo, Celia; Lemos, Gilda; Pasaron, Ivis M.; Perez, Joel J.; Benitez, Liudmila; Bequet-Romero, Monica; Fragas, Anitza; Cabrera, Yeosvany; Perez, Enrique R.	Murine monoclonal antibodies against RBD of the SARS-CoV-2 spike protein as useful analytical tools for subunit vaccine development and clinical trials	Journal of Immunological Methods		0022-1759	10.1016/j.jim.2021.113195		COVID-19 pandemic poses a serious threat to human health; it has completely disrupted global stability, making vaccine development an important goal to achieve. Monoclonal antibodies play an important role in subunit vaccines strategies. In this work, nine murine MAbs against the RBD of the SARS-CoV-2 spike protein were obtained by hybridoma technology. Characterization of purified antibodies dem…	Jan-22	2022/9/20 11:15	2022/9/20 11:15		113195			500		J. Immunol. Methods								English							Place: Amsterdam Publisher: Elsevier WOS:000788789100003				covid-19; SARS-CoV-2; coronavirus; recommendations; receptor-binding domain; Additivity index; mice; Neutralizing monoclonal antibodies; Receptor binding domain
4RIPJVKF	journalArticle	2022	Manenti, Alessandro; Gianchecchi, Elena; Dapporto, Francesca; Leonardi, Margherita; Cantaloni, Paolo; Fattorini, Filippo; Piu, Pietro; Bollati, Valentina; Pastorino, Ugo; Apolone, Giovanni; Sozzi, Gabriella; Montomoli, Emanuele	Evaluation and correlation between SARS-CoV-2 neutralizing and binding antibodies in convalescent and vaccinated subjects	Journal of Immunological Methods		0022-1759	10.1016/j.jim.2021.113197		Since the first detection of a novel Coronavirus (SARS-CoV-2) in December 2019 in Wuhan (China), it has become crucial to assess and quantize the human humoral immune response after SARS-CoV-2 natural infection and/or vaccination. Having well standardized and reliable serological assays able to accurately measure the total IgG antibodies response as well as the neutralization dynamics, play a piv…	Jan-22	2022/9/20 11:15	2022/9/20 11:15		113197			500		J. Immunol. Methods								English							Place: Amsterdam Publisher: Elsevier WOS:000788789100006				SARS-CoV-2; SARS-CoV-2 vaccine; Anti-S antibodies; Neutralizing antibodies
366YYA6B	journalArticle	2022	Wang, Ruitong; Jing, Wenzhan; Liu, Min; Liu, Jue	Trends of the Global, Regional, and National Incidence of Measles, Vaccine Coverage, and Risk Factors in 204 Countries From 1990 to 2019	Frontiers in Medicine			10.3389/fmed.2021.798031		BackgroundMeasles is a highly contagious disease that has caused global morbidity and mortality. Though great progress has been made in measles elimination, the resurgence of measles has been observed in recent years. As extant literature were mainly confined to data of local area, we conducted a systematic analysis to explore the trends of the incidence of measles, coverage rate, and the risk fa…	2022/1/20	2022/9/20 11:15	2022/9/20 11:15		798031			8		Front. Med.								English							Place: Lausanne Publisher: Frontiers Media Sa WOS:000750103300001				covid-19; vaccination; outbreak; measles; incidence; prevention; africa; elimination; eradication; progress; risk factor; routine childhood immunization; trend; vitamin-a; worldwide
K2UX2AD8	journalArticle		McCoyd, Judith L. M.; Curran, Laura; Candelario, Elsa; Findley, Patricia	"There is Just a Different Energy": Changes in the Therapeutic Relationship with the Telehealth Transition	Clinical Social Work Journal		0091-1674	10.1007/s10615-022-00844-0		The therapeutic relationship (TR), including its therapeutic frame, is the foundation of the therapeutic endeavor. In response to the COVID-19 pandemic and the rapid transition to videoconferencing for therapeutic encounters, we employed a cross-sectional exploratory survey with 1490 respondents to understand how practitioners adapted to the changes. In this secondary analysis focused on the TR, …		2022/9/20 11:15	2022/9/20 11:15							Clin. Soc. Work J.								English							Place: Dordrecht Publisher: Springer WOS:000787144300001				covid-19; Adaptation; Telehealth; Teletherapy; Therapeutic frame; Therapeutic relationship; videoconferencing psychotherapy
27NPVCBQ	journalArticle	2022	Nafar, Mohsen; Chehrazi, Saghar; Dalili, Nooshin; Firouzan, Ahmad; Poorrezagholi, Fatemeh; Samadian, Fariba; Samavat, Shiva	Humoral immunity of BBIBP-CorV (Sinopharm) in kidney transplant recipients: Is it time to revise vaccination strategies	Transplant Infectious Disease		1398-2273	10.1111/tid.13798		Background The mortality of coronavirus disease 2019 (COVID-19) is high in transplant patients, and effective vaccination is aimed to reduce severe disease and mortality. Methods We conducted a cross-sectional study to evaluate humoral and cellular response to two 4-mu g doses of BBIBP-CorV vaccine in 100 kidney transplant recipients, using anti-spike IgG, total anti-receptor-binding domain, neut…	Apr-22	2022/9/20 11:15	2022/9/20 11:15		e13798		2	24		Transpl. Infect. Dis.								English							Place: Hoboken Publisher: Wiley WOS:000755085400001				infection; humoral immunity; BBIBP-CorV (Sinopharm); kidney transplant
PGPVGZ6Q	journalArticle	2022	Oehmke, Theresa B.; Moss, Charles B.; Oehmke, James F.	COVID-19 Surveillance Updates in US Metropolitan Areas: Dynamic Panel Data Modeling	Jmir Public Health and Surveillance		2369-2960	10.2196/28737		Background: Despite the availability of vaccines, the US incidence of new COVID-19 cases per day nearly doubled from the beginning of July to the end of August 2021, fueled largely by the rapid spread of the Delta variant. While the "Delta wave" appears to have peaked nationally, some states and municipalities continue to see elevated numbers of new cases. Vigilant surveillance including at a met…	Feb-22	2022/9/20 11:15	2022/9/20 11:15		e28737		2	8		JMIR Public Health Surveill.								English							Place: Toronto Publisher: Jmir Publications, Inc WOS:000767348500001				covid-19; surveillance; coronavirus; public health; modeling; transmission; 7-Day; acceleration; data; dynamic panel data model; Houston; jerk; monitoring; persistence; response; Sars-CoV-2; speed; surveillance system; United States
VMCDZZDB	journalArticle	2022	Talaei, Mohammad; Faustini, Sian; Holt, Hayley; Jolliffe, David A.; Vivaldi, Giulia; Greenig, Matthew; Perdek, Natalia; Maltby, Sheena; Bigogno, Carola M.; Symons, Jane; Davies, Gwyneth A.; Lyons, Ronan A.; Griffiths, Christopher J.; Kee, Frank; Sheikh, Aziz; Richter, Alex G.; Shaheen, Seif O.; Martineau, Adrian R.	Determinants of pre-vaccination antibody responses to SARS-CoV-2: a population-based longitudinal study (COVIDENCE UK)	Bmc Medicine		1741-7015	10.1186/s12916-022-02286-4		Background Prospective population-based studies investigating multiple determinants of pre-vaccination antibody responses to SARS-CoV-2 are lacking. Methods We did a prospective population-based study in SARS-CoV-2 vaccine-naive UK adults recruited between May 1 and November 2, 2020, without a positive swab test result for SARS-CoV-2 prior to enrolment. Information on 88 potential sociodemographi…	2022/2/22	2022/9/20 11:15	2022/9/20 11:15		87		1	20		BMC Med.								English							Place: London Publisher: Bmc WOS:000758769800001				SARS-CoV-2; infection; Alcohol; Diet; Ethnicity; Exercise; Lifestyle; Micronutrients; Obesity; Occupation; Serology
S6BA74LB	journalArticle	2022	Mazzoni, Alessio; Vanni, Anna; Spinicci, Michele; Lamacchia, Giulia; Kiros, Seble Tekle; Rocca, Arianna; Capone, Manuela; Di Lauria, Nicoletta; Salvati, Lorenzo; Carnasciali, Alberto; Mantengoli, Elisabetta; Farahvachi, Parham; Zammarchi, Lorenzo; Lagi, Filippo; Colao, Maria Grazia; Liotta, Francesco; Cosmi, Lorenzo; Maggi, Laura; Bartoloni, Alessandro; Rossolini, Gian Maria; Annunziato, Francesco	SARS-CoV-2 infection and vaccination trigger long-lived B and CD4(+) T lymphocytes with implications for booster strategies	Journal of Clinical Investigation		0021-9738	10.1172/JCI157990		BACKGROUND. Immunization against SARS-CoV-2, the causative agent of COVID-19, occurs via natural infection or vaccination. However, it is currently unknown how long infection- or vaccination-induced immunological memory will last. METHODS. We performed a longitudinal evaluation of immunological memory to SARS-CoV-2 up to 1 year after infection and following mRNA vaccination in naive individuals a…	2022/3/15	2022/9/20 11:15	2022/9/20 11:15		e157990		6	132		J. Clin. Invest.								English							Place: Ann Arbor Publisher: Amer Soc Clinical Investigation Inc WOS:000772341500009
LYUFVY8X	journalArticle	2022	Trushina, Daria B.; Borodina, Tatiana N.; Belyakov, Sergei; Antipina, Maria N.	Calcium carbonate vaterite particles for drug delivery: Advances and challenges	Materials Today Advances		2590-0498	10.1016/j.mtadv.2022.100214		The recent successful application of lipid-based nanoparticles as delivery vehicles in COVID-19 vaccines demonstrated the superior potential of nanoparticle-based technology for targeted drug delivery in biomedicine. Among novel, rapidly advancing delivery platforms, the inorganic nano/microparticles gradually reach new heights and attract well-deserved attention among scientists and clinicians. …	Jun-22	2022/9/20 11:15	2022/9/20 11:15		100214			14		Mater. Today Adv.								English							Place: Amsterdam Publisher: Elsevier WOS:000760795200006				cancer; adsorption; controlled-release; doxorubicin; Drug delivery; hybrid nanoparticles; in-vivo; Loading capacity; Loading methods; microparticles; microspheres; Multi-drug loading; ph; photosensitizer; Tumor-targeting; Vaterite
DUCEU4LN	journalArticle		Chapagain, Ram Hari; Adhikari, Santosh; Giri, Bishnu Rath; Ray, Pankaj; Shrestha, Nisha Jyoti; Prajapati, Bina; Joshi, Prakash; Pokharel, Sunita; Tamang, Suresh Man; Gupta, Birendra Prasad; Wartel, T. Anh; Sahastrabuddhe, Sushant; Rai, Ganesh Kumar; Saluja, Tarun	Factors affecting willingness to participate in vaccine clinical trials in an underdeveloped country: perspective from Nepal	Human Vaccines & Immunotherapeutics		2164-5515	10.1080/21645515.2022.2051413		Due to the inherent complex nature of clinical trials, individual's willingness to participate and hence, enrollment in a clinical trial maybe challenging. When it comes to vaccine clinical trial in children, informed consent needs to be secured from the parents or legally acceptable representatives (LARs). Some of the factors which contribute to hesitancy in taking part in clinical trials are ba…		2022/9/20 11:15	2022/9/20 11:15							Human Vaccines Immunother.								English							Place: Philadelphia Publisher: Taylor & Francis Inc WOS:000776219100001				covid-19; willingness; barriers; Clinical trial; experience; factors; informed consent; participation
RC8K9MHN	journalArticle	2022	Keeling, Matt J.; Moore, Sam E.	An assessment of the vaccination of school-aged children in England against SARS-CoV-2	Bmc Medicine		1741-7015	10.1186/s12916-022-02379-0		Background Children and young persons are known to have a high number of close interactions, often within the school environment, which can facilitate rapid spread of infection; yet for SARS-CoV-2, it is the elderly and vulnerable that suffer the greatest health burden. Vaccination, initially targeting the elderly and vulnerable before later expanding to the entire adult population, has been tran…	2022/5/18	2022/9/20 11:15	2022/9/20 11:15		196		1	20		BMC Med.								English							Place: London Publisher: Bmc WOS:000796999800002				covid-19; surveillance; myocarditis; closure; Hospital admission; Immunisation; Infection; measles outbreak
82G3PHGP	journalArticle	2022	Shahwan, Moyad; Suliman, Abdulhaq; Jairoun, Ammar Abdulrahman; Alkhoujah, Sahib; Al-hemyari, Sabaa Saleh; Al-Tamimi, Saleh Karamah; Godman, Brian; Mothana, Ramzi A.	Prevalence, Knowledge and Potential Determinants of COVID-19 Vaccine Acceptability Among University Students in the United Arab Emirates: Findings and Implications	Journal of Multidisciplinary Healthcare		1178-2390	10.2147/JMDH.S341700		Objective: To evaluate the prevalence, knowledge, attitude and acceptance of the COVID-19 vaccines and related factors among university students in the United Arab Emirates. Methods: Analytical cross-sectional study undertaken among a convenient sample of medical and non-medical colleges of Ajman University using a self-administrated questionnaire. The questionnaire included demographic data as w…	2022	2022/9/20 11:15	2022/9/20 11:15		81-92			15		J. Multidiscip. Healthc.								English							Place: Albany Publisher: Dove Medical Press Ltd WOS:000743496400001				covid-19; vaccine; knowledge; hesitancy; acceptance; challenges; Ajman University; concerns; perception; university student
PJKUTCIM	journalArticle	2022	Hu, Ye-Fan; Hu, Jing-Chu; Gong, Hua-Rui; Danchin, Antoine; Sun, Ren; Chu, Hin; Hung, Ivan Fan-Ngai; Yuen, Kwok Yung; To, Kelvin Kai-Wang; Zhang, Bao-Zhong; Yau, Thomas; Huang, Jian-Dong	Computation of Antigenicity Predicts SARS-CoV-2 Vaccine Breakthrough Variants	Frontiers in Immunology		1664-3224	10.3389/fimmu.2022.861050		It has been reported that multiple severe acute respiratory syndrome coronavirus 2 (SARS-CoV-2) variants of concern (VOCs) including Alpha, Beta, Gamma, and Delta can reduce neutralization by antibodies, resulting in vaccine breakthrough infections. Virus-antiserum neutralization assays are typically performed to monitor potential vaccine breakthrough strains. However, experiment-based methods to…	2022/3/24	2022/9/20 11:15	2022/9/20 11:15		861050			13		Front. Immunol.								English							Place: Lausanne Publisher: Frontiers Media Sa WOS:000782515500001				SARS-CoV-2; evolution; influenza; antigenicity prediction; computation of antigenicity; vaccine breakthrough variants; variants of concern
G4QL6G62	journalArticle	2022	Canete, Roberto; Afonso, Jose A.; Brito, Katia	The Effects of the Uncontrolled Use of Biomodulina T on the Severity of Severe Acute Respiratory Syndrome-Coronavirus 2 Infection in Older Cuban Adults: An Open Label Evaluation	Current Therapeutic Research-Clinical and Experimental		0011-393X	10.1016/j.curtheres.2022.100662		Background: The ongoing coronavirus disease 2019 (COVID-19) pandemic is a worldwide public health threat. Millions of people are at risk and older adults are more susceptible to developing the most serious manifestations of the disease, in part because of the effects of ageing on the immune system. Biomod-ulina T is an injectable immune modulator that has been licensed for use in Cuba for many ye…	2022	2022/9/20 11:15	2022/9/20 11:15		100662			96		Curr. Ther. Res.-Clin. Exp.								English							Place: New York Publisher: Elsevier Science Inc WOS:000772602200001				covid-19; SARS-CoV-2; Biomodulina T; community intervention
RTEBY9YS	journalArticle	2022	Hernandez-Luis, Pablo; Aguilar, Ruth; Pelegrin-Perez, Judit; Ruiz-Olalla, Gemma; Garcia-Basteiro, Alberto L.; Tortajada, Marta; Moncunill, Gemma; Dobano, Carlota; Angulo, Ana; Engel, Pablo	Decreased and Heterogeneous Neutralizing Antibody Responses Against RBD of SARS-CoV-2 Variants After mRNA Vaccination	Frontiers in Immunology		1664-3224	10.3389/fimmu.2022.816389		The rapid spread of Severe Acute Respiratory Syndrome Coronavirus 2 (SARS-CoV-2) emerging variants raises concerns about their capacity to evade immune protection provided by natural infection or vaccination. The receptor-binding domain (RBD) of the viral spike protein is the major target of neutralizing antibodies, and viral variants accumulate mutations in this region. In this study, we determi…	2022/4/6	2022/9/20 11:15	2022/9/20 11:15		816389			13		Front. Immunol.								English							Place: Lausanne Publisher: Frontiers Media Sa WOS:000789614800001				covid-19; mRNA vaccines; SARS-CoV-2 variants; BNT162b2 mRNA; healthcare workers (HCW); mRNA1273; neutralizing antibodies (NAB); receptor binding domain (RBD)
DPE463QP	journalArticle	2022	Shan, Sisi; Luo, Shitong; Yang, Ziqing; Hong, Junxian; Su, Yufeng; Ding, Fan; Fu, Lili; Li, Chenyu; Chen, Peng; Ma, Jianzhu; Shi, Xuanling; Zhang, Qi; Berger, Bonnie; Zhang, Linqi; Peng, Jian	Deep learning guided optimization of human antibody against SARS-CoV-2 variants with broad neutralization	Proceedings of the National Academy of Sciences of the United States of America		0027-8424	10.1073/pnas.2122954119		The ability of viruses to mutate and evade the human immune system and neutralizing antibodies remains an obstacle to antiviral and vaccine development. Many neutralizing antibodies, including some approved for emergency use authorization (EUA), reduced or lost activity against severe acute respiratory syndrome coronavirus 2 (SARS-CoV-2) variants. Here, we introduce a geometric deep learning algo…	2022/3/15	2022/9/20 11:15	2022/9/20 11:15		e2122954119		11	119		Proc. Natl. Acad. Sci. U. S. A.								English							Place: Washington Publisher: Natl Acad Sciences WOS:000771757800017				coronavirus; SARS-CoV-2 variants; ace2; affinity maturation; broadly neutralizing antibodies; cocktail; computational biology; deep learning; geometric neural networks
7QYSSEP6	journalArticle	2022	Watanabe, Mikiko; Balena, Angela; Masi, Davide; Tozzi, Rossella; Risi, Renata; Caputi, Alessandra; Rossetti, Rebecca; Spoltore, Maria Elena; Biagi, Filippo; Anastasi, Emanuela; Angeloni, Antonio; Mariani, Stefania; Lubrano, Carla; Tuccinardi, Dario; Gnessi, Lucio	Rapid Weight Loss, Central Obesity Improvement and Blood Glucose Reduction Are Associated with a Stronger Adaptive Immune Response Following COVID-19 mRNA Vaccine	Vaccines			10.3390/vaccines10010079		Obesity is associated with a poor COVID-19 prognosis, and it seems associated with reduced humoral response to vaccination. Public health campaigns have advocated for weight loss in subjects with obesity, hoping to eliminate this risk. However, no evidence proves that weight loss leads to a better prognosis or a stronger immune response to vaccination. We aimed to investigate the impact of rapid …	Jan-22	2022/9/20 11:15	2022/9/20 11:15		79		1	10		Vaccines								English							Place: Basel Publisher: Mdpi WOS:000748052300001				infection; vaccination; impact; t-cells; immunogenicity; system; adults; bmi; diabetes; metabolism; necrosis-factor-alpha; SARS CoV-2; telomeres; waist circumference
8FJXXYRE	journalArticle		Shortreed, Susan M.; Gray, Regan; Akosile, Mary Abisola; Walker, Rod L.; Fuller, Sharon; Temposky, Lisa; Fortmann, Stephen P.; Albertson-Junkans, Ladia; Floyd, James S.; Bayliss, Elizabeth A.; Harrington, Laura B.; Lee, Mi H.; Dublin, Sascha	Increased COVID-19 Infection Risk Drives Racial and Ethnic Disparities in Severe COVID-19 Outcomes	Journal of Racial and Ethnic Health Disparities		2197-3792	10.1007/s40615-021-01205-2		COVID-19 inequities have been well-documented. We evaluated whether higher rates of severe COVID-19 in racial and ethnic minority groups were driven by higher infection rates by evaluating if disparities remained when analyses were restricted to people with infection. We conducted a retrospective cohort study of adults insured through Kaiser Permanente (Colorado, Northwest, Washington), follow-up…		2022/9/20 11:15	2022/9/20 11:15							J. Racial Ethn. Health Disparities								English							Place: Cham Publisher: Springer Int Publ Ag WOS:000746307300003				mortality; Infection; COVID-19 disease severity; Health disparities; Health equity; Health impacts of structural racism; health inequities; structural racism
63HKVANI	journalArticle	2022	Behrouzi, Bahar; Bhatt, Deepak L.; Cannon, Christopher P.; Vardeny, Orly; Lee, Douglas S.; Solomon, Scott D.; Udell, Jacob A.	Association of Influenza Vaccination With Cardiovascular Risk A Meta-analysis	Jama Network Open		2574-3805	10.1001/jamanetworkopen.2022.8873		IMPORTANCE Influenza infection is associated with increased cardiovascular hospitalization and mortality. Our prior systematic review and meta-analysis hypothesized that influenza vaccination was associated with a lower risk of cardiovascular events. OBJECTIVE To evaluate, via an updated meta-analysis, if seasonal influenza vaccination is associated with a lower risk of fatal and nonfatal cardiov…	2022/4/29	2022/9/20 11:15	2022/9/20 11:15		e228873		4	5		JAMA Netw. Open								English							Place: Chicago Publisher: Amer Medical Assoc WOS:000788722700002				infection; efficacy; prevention; events; rationale
72GS3CX5	journalArticle	2022	Ramot, Yuval; Kronfeld, Noam; Ophir, Yakir; Ezov, Nati; Friedman, Sheli; Saloheimo, Markku; Vitikainen, Marika; Ben-Artzi, Hanna; Avigdor, Avi; Tchelet, Ronen; Valbuena Crespo, Noelia; Emalfarb, Mark; Nyska, Abraham	Toxicity and Local Tolerance of a Novel Spike Protein RBD Vaccine Against SARS-CoV-2, Produced Using the C1 Thermothelomyces Heterothallica Protein Expression Platform	Toxicologic Pathology		0192-6233	10.1177/01926233221090518		Coronavirus disease 2019 (COVID-19) has caused the ongoing COVID-19 pandemic and there is a growing demand for safe and effective vaccines. The thermophilic Thermothelomyces heterothallica filamentous fungal host, C1-cell, can be utilized as an expression platform for the rapid production of large quantities of antigens for developing vaccines. The aim of this study was to evaluate the local tole…	Apr-22	2022/9/20 11:15	2022/9/20 11:15		294-307		3	50		Toxicol. Pathol.								English							Place: Thousand Oaks Publisher: Sage Publications Inc WOS:000796242100001				covid-19; SARS-CoV-2; vaccine; safety; rbd; c1; rabbits; Thermothelomyces heterothallica; toxicity
QZDWAS4S	journalArticle	2022	De Marco, Lorenzo; D'Orso, Silvia; Pirronello, Marta; Verdiani, Alice; Termine, Andrea; Fabrizio, Carlo; Capone, Alessia; Sabatini, Andrea; Guerrera, Gisella; Placido, Roberta; Sambucci, Manolo; Angelini, Daniela F.; Giannessi, Flavia; Picozza, Mario; Caltagirone, Carlo; Salvia, Antonino; Volpe, Elisabetta; Balice, Maria Pia; Rossini, Angelo; Rotzschke, Olaf; Giardina, Emiliano; Battistini, Luca;…	Assessment of T-cell Reactivity to the SARS-CoV-2 Omicron Variant by Immunized Individuals	Jama Network Open		2574-3805	10.1001/jamanetworkopen.2022.10871		IMPORTANCE The emergence of the highly contagious Omicron variant of SARS-CoV-2 and the findings of a significantly reduced neutralizing potency of sera from individuals with previous SARS-CoV-2 infection or vaccination highlights the importance of studying cellular immunity to estimate the degree of immune protection to the new SARS-CoV-2 variant. OBJECTIVE To determine T-cell reactivity to the …	2022/4/22	2022/9/20 11:15	2022/9/20 11:15		e2210871		4	5		JAMA Netw. Open								English							Place: Chicago Publisher: Amer Medical Assoc WOS:000784873800010
VI2MCTMA	journalArticle	2022	Doppler, Christian; Feischl, Michael; Ganhor, Clara; Puh, Spela; Mueller, Marina; Kotnik, Michaela; Mimler, Teresa; Sonnleitner, Max; Bernhard, David; Wechselberger, Christian	Low-entry-barrier point-of-care testing of anti-SARS-CoV-2 IgG in the population of Upper Austria from December 2020 until April 2021-a feasible surveillance strategy for post-pandemic monitoring?	Analytical and Bioanalytical Chemistry		1618-2642	10.1007/s00216-022-03966-z		Already at the very beginning of the COVID-19 pandemic, an extensive PCR and antigen testing strategy was considered necessary and subsequently also proved successful in order to limit the spread of severe acute respiratory syndrome coronavirus 2 (SARS-CoV-2) infections on international and national levels. However, equally important will be the continuous monitoring of the seroprevalence status …	Apr-22	2022/9/20 11:15	2022/9/20 11:15		3291-3299		10	414		Anal. Bioanal. Chem.								English							Place: Heidelberg Publisher: Springer Heidelberg WOS:000762343300002				covid-19; SARS-CoV-2; Immunoglobulin; Point-of-care; Rapid test; Surveillance
JVD45ZWT	journalArticle	2022	Ahmed, Syed Faraz; Sohail, Muhammad Saqib; Quadeer, Ahmed Abdul; McKay, Matthew R.	Identification of Potential SARS-CoV-2 CD8(+) T Cell Escape Mutants	Vaccines			10.3390/vaccines10040542		Memory SARS-CoV-2-specific CD8(+) T cell responses induced upon infection or COVID-19 vaccination have been important for protecting against severe COVID-19 disease while being largely robust against variants of concern (VOCs) observed so far. However, T cell immunity may be weakened by genetic mutations in future SARS-CoV-2 variants that lead to widespread T cell escape. The capacity for SARS-Co…	Apr-22	2022/9/20 11:15	2022/9/20 11:15		542		4	10		Vaccines								English							Place: Basel Publisher: Mdpi WOS:000786189200001				covid-19; SARS-CoV-2; mutations; variants; variants of concern; CD8(+) T cell epitopes; immune escape; immunoprevalent
TCPMN6W7	journalArticle		Atmar, R. L.; Lyke, K. E.; Deming, M. E.; Jackson, L. A.; Branche, A. R.; El Sahly, H. M.; Rostad, C. A.; Martin, J. M.; Johnston, C.; Rupp, R. E.; Mulligan, M. J.; Brady, R. C.; Frenck, R. W.; Backer, M.; Kottkamp, A. C.; Babu, T. M.; Rajakumar, K.; Edupuganti, S.; Dobrzynski, D.; Coler, R. N.; Posavad, C. M.; Archer, J.; Crandon, S.; Nayak, S. U.; Szydlo, D.; Zemanek, J. A.; Islas, C. P. Doming…	Homologous and Heterologous Covid-19 Booster Vaccinations	New England Journal of Medicine		0028-4793	10.1056/NEJMoa2116414		BACKGROUND Although the three vaccines against coronavirus disease 2019 (Covid-19) that have received emergency use authorization in the United States are highly effective, breakthrough infections are occurring. Data are needed on the serial use of homologous boosters (same as the primary vaccine) and heterologous boosters (different from the primary vaccine) in fully vaccinated recipients. METHO…		2022/9/20 11:15	2022/9/20 11:15							N. Engl. J. Med.								English							Place: Waltham Publisher: Massachusetts Medical Soc WOS:000747075300001				vaccines; antibodies; sars-cov-2; delta variant predominance
EYFMXSSG	journalArticle	2022	Elgendy, Marwa O.; El-Gendy, Ahmed O.; Mahmoud, Sarah; Mohammed, Tarek Yehia; Abdelrahim, Mohamed E. A.; Sayed, Ahmed M.	Side Effects and Efficacy of COVID-19 Vaccines among the Egyptian Population	Vaccines			10.3390/vaccines10010109		Background: Knowledge about a vaccine's side effects and efficacy is important to improving public vaccine acceptance. This study aimed to detect the safety and efficacy of vaccines among the Egyptian population. Methodology and Results: Data was collected using an online survey from participants who took two doses of the BBIBP-CorV, ChAdOx1, or BNT162 vaccines. Pain at the vaccine injection site…	Jan-22	2022/9/20 11:15	2022/9/20 11:15		109		1	10		Vaccines								English							Place: Basel Publisher: Mdpi WOS:000748140400001				COVID-19 vaccine; residents; vaccine efficacy; BBIBP-CorV; BioNTech; bnt162; ChAdOx1; vaccine antibodies; vaccine side effects
L2QV62YF	journalArticle	2022	Mak, Willem A.; Koeleman, Johannes G. M.; van der Vliet, Marijke; Keuren, Frans; Ong, David S. Y.	SARS-CoV-2 antibody and T cell responses one year after COVID-19 and the booster effect of vaccination: A prospective cohort study	Journal of Infection		0163-4453	10.1016/j.jinf.2021.12.003		Objectives: First, to describe SARS-CoV-2 T cell and antibody responses in a prospective cohort of healthcare workers that suffered from mild to moderate COVID-19 approximately one year ago. Second, to assess COVID-19 vaccine-induced immune responses in these prior-infected individuals. Methods: SARS-CoV-2-specific T cell and anti-SARS-CoV-2-Spike-RBD immunoglobulin G (IgG) responses in blood wer…	Feb-22	2022/9/20 11:15	2022/9/20 11:15		171-178		2	84		J. Infect.								English							Place: London Publisher: W B Saunders Co Ltd WOS:000759978600017				covid-19; SARS-CoV-2; Vaccination; Immunity; Antibody; T cell
97ZCAB3D	journalArticle	2022	Teasdale, Chloe A.; Borrell, Luisa N.; Shen, Yanhan; Kimball, Spencer; Rinke, Michael L.; Rane, Madhura S.; Kulkarni, Sarah; Fleary, Sasha A.; Nash, Denis	COVID-19 Testing Among US Children, Parental Preferences for Testing Venues, and Acceptability of School-Based Testing	Public Health Reports		0033-3549	10.1177/00333549211065518		Objectives: Testing remains critical for identifying pediatric cases of COVID-19 and as a public health intervention to contain infections. We surveyed US parents to measure the proportion of children tested for COVID-19 since the start of the pandemic, preferred testing venues for children, and acceptability of school-based COVID-19 testing. Methods: We conducted an online survey of 2074 US pare…	Mar-22	2022/9/20 11:15	2022/9/20 11:15		362-369		2	137		Public Health Rep.								English							Place: Thousand Oaks Publisher: Sage Publications Inc WOS:000749425100001				covid-19; united-states; children; pediatric testing; plans; school-based testing; testing venues; vaccinate children
TMJF3QYY	journalArticle	2022	Flaxman, Abraham D.; Issema, Rodal; Barnabas, Ruanne; Ross, Jennifer M.	Estimated Health Outcomes and Costs of COVID-19 Prophylaxis With Monoclonal Antibodies Among Unvaccinated Household Contacts in the US	Jama Network Open		2574-3805	10.1001/jamanetworkopen.2022.8632		IMPORTANCE The COVID-19 pandemic has led to more than 900 000 deaths in the US and continues to disrupt lives even as effective vaccines are available. OBJECTIVE To estimate the health outcomes and net cost of implementing postexposure prophylaxis (PEP) with monoclonal antibodies (mAbs) against household exposure to COVID-19. DESIGN, SETTING, AND PARTICIPANTS This study is a decision analytical m…	2022/4/22	2022/9/20 11:15	2022/9/20 11:15		e228632		4	5		JAMA Netw. Open								English							Place: Chicago Publisher: Amer Medical Assoc WOS:000784873800008				vaccines
8WDSN2UD	journalArticle	2022	Matsunaga, Hidenori; Takeuchi, Hidefumi; Oba, Yuichiro; Fujimi, Satoshi; Honda, Tomoyuki; Tomonaga, Keizo	Waning of Anti-SARS-CoV-2 Spike Antibody Levels 100 to 200 Days after the Second Dose of the BNT162b2 Vaccine	Vaccines			10.3390/vaccines10020177		Anti-SARS-CoV-2 antibodies of 444 vaccinated hospital employees in Japan were measured 94-109 days and 199-212 days after receiving the second BNT162b2 vaccine dose to evaluate the intensity and duration of antibody response in our own cohort. Among uninfected participants, anti-S antibody levels were greatly decreased 199-212 days after the second vaccination compared to the levels measured 94-1…	Feb-22	2022/9/20 11:15	2022/9/20 11:15		177		2	10		Vaccines								English							Place: Basel Publisher: Mdpi WOS:000762114000001				delta variant; anti-SARS-CoV-2 spike antibody; BNT162b2 vaccine; sex-associated differences; third antigen stimulation
4I9WZ7LK	journalArticle		Hodge, Bonnie; Daniel, C. Ralph; Elewski, Boni Elizabeth	Vaccine Toes Are the New COVID Toes	Skin Appendage Disorders		2296-9195	10.1159/000521724		Introduction: Pernio-like lesions were reported as dermatologic manifestations of COVID-19 as early as May of 2020. Since mRNA COVID-19 vaccines were introduced in December 2020, 9 reports of vaccine-associated pernio-like lesions have been presented in the medical literature. Case Presentation: A male in his 60s developed pernio-like lesions on the bilateral toes approximately 1 week after recei…		2022/9/20 11:15	2022/9/20 11:15							Skin. Appendage Disord.								English							Place: Basel Publisher: Karger WOS:000793488000001				COVID-19 vaccine; Pernio-like lesions
DLPDV9XR	journalArticle	2022	Sobolik, Julia S.; Sajewski, Elizabeth T.; Jaykus, Lee-Ann; Cooper, D. Kane; Lopman, Ben A.; Kraay, Alicia N. M.; Ryan, P. Barry; Guest, Jodie L.; Webb-Girard, Amy; Leon, Juan S.	Decontamination of SARS-CoV-2 from cold-chain food packaging provides no marginal benefit in risk reduction to food workers	Food Control		0956-7135	10.1016/j.foodcont.2022.108845		Countries continue to debate the need for decontamination of cold-chain food packaging to reduce possible severe acute respiratory syndrome coronavirus 2 (SARS-CoV-2) fomite transmission among frontline workers. While laboratory-based studies demonstrate persistence of SARS-CoV-2 on surfaces, the likelihood of fomite-mediated transmission under real-life conditions is uncertain. Using a quantitat…	Jun-22	2022/9/20 11:15	2022/9/20 11:15		108845			136		Food Control								English							Place: Oxford Publisher: Elsevier Sci Ltd WOS:000790985700001				covid-19; infection; transmission; bacteria; Cold-chain fomite-mediated transmission; contamination; exposure; hand; norovirus; Plastic packaging; Quantitative microbial risk assessment; transfer efficiency; viruses
49PLIDY2	journalArticle		Nakayama, Don K.	America's Original Immunization Controversy: The Tercentenary of the Boston Smallpox Epidemic of 1721	American Surgeon		0003-1348	10.1177/00031348221074228		The CoVID-19 pandemic marks the 300th anniversary of the Boston smallpox epidemic of 1721, America's first immunization controversy. Puritan minister Cotton Mather learned of inoculation for smallpox from Onesimus, a man enslaved to him. When the disease broke out in May 1721, Mather urged Boston's physicians to inoculate all those vulnerable to the disease. Zabdiel Boylston, alone among his coll…		2022/9/20 11:15	2022/9/20 11:15		3.13482E+13					Am. Surg.								English							Place: Thousand Oaks Publisher: Sage Publications Inc WOS:000751246300001
IQGKEUXN	journalArticle	2022	Shin, Dong Hoon; Oh, Hong Sang; Jang, Haebong; Lee, Sangho; Choi, Byung Seop; Kim, Donghoon	Analyses of Confirmed COVID-19 Cases Among Korean Military Personnel After Mass Vaccination	Journal of Korean Medical Science		1011-8934	10.3346/jkms.2022.37.e23		Background: The military was one of the first groups in Korea to complete mass vaccination against the coronavirus disease 2019 (COVID-19) due to their high vulnerability to COVID-19. To confirm the effect of mass vaccination, this study analyzed the patterns of confirmed cases within Korean military units. Methods: From August 1 to September 15, 2021, all epidemiological data regarding confirmed…	2022/1/17	2022/9/20 11:15	2022/9/20 11:15		e23		3	37		J. Korean Med. Sci.								English							Place: Seoul Publisher: Korean Acad Medical Sciences WOS:000745620100006				covid-19; Vaccination; booster; immunogenicity; Cluster Infection; Delta Variant; herd-immunity; Korean Military; states
H94AZS4W	journalArticle	2022	Yaghoubi, Fatemeh; Dalil, Davood	Acquired thrombotic thrombocytopenic purpura after AstraZeneca vaccine: A case report	Caspian Journal of Internal Medicine		2008-6164	10.22088/cjim.13.0.299		Background: Rare cases of acquired thrombotic thrombocytopenic purpura (aTTP) have been reported since the administration of the COVID-19 vaccination. Based on our information, the present study provides the first case report of aTTP developed after the COVID-19 vaccination in Iran. Case presentation: A 22-year-old Iranian woman presented with symptoms of ataxia, dysphasia, paresthesia, and acute…	2022	2022/9/20 11:15	2022/9/20 11:15		299-302			13		Casp. J. Intern. Med.								English							Place: Babol Publisher: Babol Univ Medical Sciences WOS:000793146900019				covid-19; ttp; Vaccines; AstraZeneca; Thrombocytopenia
NRS5ZU6Z	journalArticle	2022	Kim, Min-Kyung; Lee, Bora; Choi, Youn Young; Um, Jihye; Lee, Kyung-Shin; Sung, Ho Kyung; Kim, Yeonjae; Park, Jun-Sun; Lee, Myungsun; Jang, Hee-Chang; Bang, Ji Hwan; Chung, Ki-hyun; Jeon, Jaehyun	Clinical Characteristics of 40 Patients Infected With the SARS-CoV-2 Omicron Variant in Korea	Journal of Korean Medical Science		1011-8934	10.3346/jkms.2022.37.e31		Since severe acute respiratory syndrome-coronavirus-2 variant B.1.1.529 (omicron) was first reported to the World Health Organization on November 24, 2021, the cases of the omicron variant have been detected in more than 90 countries over the last month. We investigated the clinical and epidemiological characteristics of the first 40 patients with the omicron variant who had been isolated at the …	2022/1/17	2022/9/20 11:15	2022/9/20 11:15		e31		3	37		J. Korean Med. Sci.								English							Place: Seoul Publisher: Korean Acad Medical Sciences WOS:000745620100005				covid-19; B.1.1.529 SARS-CoV-2 Variant; Cohort Studies; Republic of Korea; tuberculosis-control
JRGABNXW	journalArticle	2022	Zhong, Lu; Diagne, Mamadou; Wang, Qi; Gao, Jianxi	Vaccination and three non-pharmaceutical interventions determine the dynamics of COVID-19 in the US	Humanities & Social Sciences Communications			10.1057/s41599-022-01142-3		The rapid rollout of the COVID-19 vaccine raises the question of whether and when the ongoing pandemic could be eliminated with vaccination and non-pharmaceutical interventions (NPIs). Despite advances in the impact of NPIs and the conceptual belief that NPIs and vaccination control COVID-19 infections, we lack evidence to employ control theory in real-world social human dynamics in the context o…	2022/4/27	2022/9/20 11:15	2022/9/20 11:15		149		1	9		Hum. Soc. Sci. Commun.								English							Place: London Publisher: Springernature WOS:000788317900003				vaccines; elimination; strategy
S2FXIYPD	journalArticle	2022	Peng, Lei; Hu, Yingxia; Mankowski, Madeleine C.; Ren, Ping; Chen, Rita E.; Wei, Jin; Zhao, Min; Li, Tongqing; Tripler, Therese; Ye, Lupeng; Chow, Ryan D.; Fang, Zhenhao; Wu, Chunxiang; Dong, Matthew B.; Cook, Matthew; Wang, Guilin; Clark, Paul; Nelson, Bryce; Klein, Daryl; Sutton, Richard; Diamond, Michael S.; Wilen, Craig B.; Xiong, Yong; Chen, Sidi	Monospecific and bispecific monoclonal SARS-CoV-2 neutralizing antibodies that maintain potency against B.1.617	Nature Communications			10.1038/s41467-022-29288-3		COVID-19 pathogen SARS-CoV-2 has infected hundreds of millions and caused over 5 million deaths to date. Although multiple vaccines are available, breakthrough infections occur especially by emerging variants. Effective therapeutic options such as monoclonal antibodies (mAbs) are still critical. Here, we report the development, cryo-EM structures, and functional analyses of mAbs that potently neu…	2022/3/28	2022/9/20 11:15	2022/9/20 11:15		1638		1	13		Nat. Commun.								English							Place: Berlin Publisher: Nature Portfolio WOS:000774213100014				infection; domain; spike; mechanisms; cryo-em structure; ace2; refinement
GZQJ5E29	journalArticle	2022	Shukla, Priyank; Pandey, Preeti; Prasad, Bodhayan; Robinson, Tony; Purohit, Rituraj; D'Cruz, Leon G.; Tambuwala, Murtaza M.; Mutreja, Ankur; Harkin, Jim; Rai, Taranjit Singh; Murray, Elaine K.; Gibson, David S.; Bjourson, Anthony J.	Immuno-informatics analysis predicts B and T cell consensus epitopes for designing peptide vaccine against SARS-CoV-2 with 99.82% global population coverage	Briefings in Bioinformatics		1467-5463	10.1093/bib/bbab496		The current global pandemic due to Severe Acute Respiratory Syndrome Coronavirus 2 (SARS-CoV-2) has taken a substantial number of lives across the world. Although few vaccines have been rolled-out, a number of vaccine candidates are still under clinical trials at various pharmaceutical companies and laboratories around the world. Considering the intrinsic nature of viruses in mutating and evolvin…	2022/1/17	2022/9/20 11:15	2022/9/20 11:15		bbab496		1	23		Brief. Bioinform.								English							Place: Oxford Publisher: Oxford Univ Press WOS:000763000800168				SARS-CoV-2; responses; vaccine; peptide; bio-informatics; immuno-informatics
B7375RF2	journalArticle	2022	Fruendt, Odette; Hanff, Anne-Marie; Mai, Tobias; Kirchner, Christiane; Bouzanne des Mazery, Emma; Amouzandeh, Ali; Buhmann, Carsten; Krueger, Rejko; Suedmeyer, Martin	Impact of COVID-19 Pandemic on (Health) Care Situation of People with Parkinson's Disease in Germany (Care4PD)	Brain Sciences			10.3390/brainsci12010062		The Care4PD study examined the impact of the COVID-19 pandemic on the care situation of people (PwP) with Parkinson's disease in Germany. A comprehensive, nationwide, anonymous questionnaire for PwP was distributed by the members' journal of the German Parkinson's Disease Association and in several PD specialized in- and outpatient institutions. PwP subjectively evaluated their general care situa…	Jan-22	2022/9/20 11:15	2022/9/20 11:15		62		1	12		Brain Sci.								English							Place: Basel Publisher: Mdpi WOS:000747677800001				covid-19; vaccination; impact; management; care; Germany; anxiety; depression; times; antonini et-al.; Care4PD; corona; impairments; Parkinson's disease; publication; telemedicine
U5IZQYG7	journalArticle		Al-Riyami, Arwa Z.; Burnouf, Thierry; Wood, Erica M.; Devine, Dana V.; Oreh, Adaeze; Apelseth, Torunn Oveland; Goel, Ruchikha; Bloch, Evan M.; van den Berg, Karin; Getshen, Mahrukh; Louw, Vernon; Ang, Ai Leen; Lee, Cheuk Kwong; Rahimi-Levene, Naomi; Stramer, Susan L.; Vassallo, Ralph; Schulze, Torsten J.; Patidar, Gopal Kumar; Pandey, Hem Chandra; Dubey, Rounak; Badawi, Maha; Hindawi, Salwa; Mesh…	International Society of Blood Transfusion survey of experiences of blood banks and transfusion services during the COVID-19 pandemic	Vox Sanguinis		0042-9007	10.1111/vox.13256		Background and Objectives The coronavirus disease 2019 (COVID-19) pandemic has impacted blood systems worldwide. Challenges included maintaining blood supplies and initiating the collection and use of COVID-19 convalescent plasma (CCP). Sharing information on the challenges can help improve blood collection and utilization. Materials and Methods A survey questionnaire was distributed to Internati…		2022/9/20 11:15	2022/9/20 11:15							Vox Sang.								English							Place: Hoboken Publisher: Wiley WOS:000765879500001				covid-19; pandemic; blood supply; convalescent plasma; transfusion
KI8RBERR	journalArticle	2022	Dash, Pujarini; Mansingh, Asit; Nayak, Soumya Ranjan; Sahoo, Debadutta; Bhattacharya, Debdutta; Kanungo, Srikanta; Kshatri, Jaya Singh; Mishra, Bijaya Kumar; Pattnaik, Matrujyoti; Parai, Debaprasad; Choudhury, Hari Ram; Nayak, Swetalina; Rana, Khokan; Alce, Alice; Sahoo, Ajay Kumar; Mohanty, Kanhu Charan; Mohanty, Prasantajyoti; Doley, Chinki; Jain, Hitesh; Majhi, Dasarath; Patnaik, Pooja; Behuri…	Infection, cases due to SARS-CoV-2 in rural areas during early COVID-19 vaccination: findings from serosurvey study in a rural cohort of eastern India	Epidemiology and Infection		0950-2688	10.1017/S0950268822000346		COVID-19 serosurvey provides a better estimation of people who have developed antibody against the infection. But limited information on such serosurveys in rural areas poses many hurdles to understand the epidemiology of the virus and to implement proper control strategies. This study was carried out in the rural catchment area of Model Rural Health Research Unit in Odisha, India during March-Ap…	2022/3/3	2022/9/20 11:15	2022/9/20 11:15		e58			150		Epidemiol. Infect.								English							Place: New York Publisher: Cambridge Univ Press WOS:000768543700001				Coronavirus; epidemiology; rural area; sero-survey
6UPEKSTR	journalArticle	2022	Perez-Alos, Laura; Armenteros, Jose Juan Almagro; Madsen, Johannes Roth; Hansen, Cecilie Bo; Jarlhelt, Ida; Hamm, Sebastian Rask; Heftdal, Line Dam; Pries-Heje, Mia Marie; Moller, Dina Leth; Fogh, Kamille; Hasselbalch, Rasmus Bo; Rosbjerg, Anne; Brunak, Soren; Sorensen, Erik; Larsen, Margit Anita Horup; Ostrowski, Sisse Rye; Frikke-Schmidt, Ruth; Bayarri-Olmos, Rafael; Hilsted, Linda Maria; Ivers…	Modeling of waning immunity after SARS-CoV-2 vaccination and influencing factors	Nature Communications			10.1038/s41467-022-29225-4		This study investigates the dynamics of immunological markers after first SARS-CoV-2 vaccination dose in cohort of healthcare professionals in Denmark. Natural infection was associated with higher antibody responses, and IgG decline varied by age, sex, T-cell response, previous infection, and interval between vaccine doses. SARS-CoV-2 vaccines are crucial in controlling COVID-19, but knowledge of…	2022/3/28	2022/9/20 11:15	2022/9/20 11:15		1614		1	13		Nat. Commun.								English							Place: Berlin Publisher: Nature Portfolio WOS:000774213100017
NKSFTSIT	journalArticle	2022	Correa, Isadora Alonso; Rodrigues, Tamires de Souza; Queiroz, Alex; Nascimento, Leon de Franca; Wolff, Thiago; Akamine, Rubens Nobumoto; Kuriyama, Sergio Noboru; da Costa, Luciana Jesus; Fidalgo-Neto, Antonio Augusto	Boosting SARS-CoV-2 detection combining pooling and multiplex strategies	Scientific Reports		2045-2322	10.1038/s41598-022-12747-8		RT-qPCR is the gold standard technique available for SARS-CoV-2 detection. However, the long test run time and costs associated with this type of molecular testing are a challenge in a pandemic scenario. Due to high testing demand, especially for monitoring highly vaccinated populations facing the emergence of new SARS-CoV-2 variants, strategies that allow the increase in testing capacity and cos…	2022/5/23	2022/9/20 11:15	2022/9/20 11:15		8684		1	12		Sci Rep								English							Place: Berlin Publisher: Nature Portfolio WOS:000799388600066				diagnosis; chlamydia-trachomatis; cost-effectiveness; pcr; swab specimens; syndrome-coronavirus 2; testing capacity
NAVTC5WY	journalArticle	2022	Wu, James Fan; Bajwa, Umair; Hammad, Muhammad	Vaccine-induced immune thrombotic thrombocytopenia in a male after Ad26.COV2.S vaccination presenting as cerebral venous sinus thrombosis	Platelets		0953-7104	10.1080/09537104.2022.2071854		Vaccine-induced immune thrombotic thrombocytopenia (VITT) is a rare and life-threatening complication that can occur after COVID-19 vaccination. After the first reports of VITT and CVST in 2021 after Ad26.COV2.S vaccination, the FDA and CDC recommended an emergency pause on 13 April 2021, and after extensive safety reviews, on 23 April 2021, the CDC's Advisory Committee on Immunization Practices …	2022/7/4	2022/9/20 11:15	2022/9/20 11:15		797-800		5	33		Platelets								English							Place: Philadelphia Publisher: Taylor & Francis Inc WOS:000793052000001				covid-19; Ad26; cerebral venous sinus thrombosis; cov2; COVID-19 vaccination; s; thrombosis and thrombocytopenia syndrome; vaccine-induced immune thrombotic thrombocytopenia
HD32LX8A	journalArticle	2022	Saldana, Joan; Scoglio, Caterina	Influence of heterogeneous age-group contact patterns on critical vaccination rates for herd immunity to SARS-CoV-2	Scientific Reports		2045-2322	10.1038/s41598-022-06477-0		Currently, several western countries have more than half of their population fully vaccinated against COVID-19. At the same time, some of them are experiencing a fourth or even a fifth wave of cases, most of them concentrated in sectors of the populations whose vaccination coverage is lower than the average. So, the initial scenario of vaccine prioritization has given way to a new one where achie…	2022/2/16	2022/9/20 11:15	2022/9/20 11:15		2640		1	12		Sci Rep								English							Place: Berlin Publisher: Nature Portfolio WOS:000757107700056				risk; covid-19 vaccine
Q3PQYZ3I	journalArticle	2022	Green, William D.; Ferguson, Neil M.; Cori, Anne	Inferring the reproduction number using the renewal equation in heterogeneous epidemics	Journal of the Royal Society Interface		1742-5689	10.1098/rsif.2021.0429		Real-time estimation of the reproduction number has become the focus of modelling groups around the world as the SARS-CoV-2 pandemic unfolds. One of the most widely adopted means of inference of the reproduction number is via the renewal equation, which uses the incidence of infection and the generation time distribution. In this paper, we derive a multi-type equivalent to the renewal equation to…	2022/3/30	2022/9/20 11:15	2022/9/20 11:15		20210429		188	19		J. R. Soc. Interface								English							Place: London Publisher: Royal Soc WOS:000778665500004				covid-19; vaccination; coronavirus; strategies; epidemics; herd-immunity; asymptomatic transmission; contacts; ebola-virus; excretion; framework; generation time; heterogeneous; renewal equation; transmission dynamics
KDL3JS5X	journalArticle	2022	Netti, Giuseppe S.; Infante, Barbara; Troise, Dario; Mercuri, Silvia; Panico, Maddalena; Spadaccino, Federica; Catalano, Valeria; Gigante, Margherita; Simone, Simona; Pontrelli, Paola; Gesualdo, Loreto; Ranieri, Elena; Castellano, Giuseppe; Stallone, Giovanni	mTOR inhibitors improve both humoral and cellular response to SARS-CoV-2 messenger RNA BNT16b2 vaccine in kidney transplant recipients	American Journal of Transplantation		1600-6135	10.1111/ajt.16958		Kidney transplant recipients (KTRs) have been considered as patients at higher risk of SARS-CoV-2-related disease severity, thus COVID-19 vaccination was highly recommended. However, possible interferences of different immunosuppression with development of both humoral and T cell-mediated immune response to COVID-19 vaccination have not been determined. Here we evaluated the association between m…	May-22	2022/9/20 11:15	2022/9/20 11:15		1475-1482		5	22		Am. J. Transplant.								English							Place: Hoboken Publisher: Wiley WOS:000747936700001				covid-19; SARS-CoV-2 vaccine; kidney transplantation; mTOR inhibitors
CPQKHDBF	journalArticle	2022	Goodyear-Smith, Felicity; Kidd, Michael; Oseni, Tijani Idris Ahmad; Nashat, Nagwa; Mash, Robert; Akman, Mehmet; Phillips, Robert L.; van Weel, Chris	International examples of primary care COVID-19 preparedness and response: a comparison of four countries	Family Medicine and Community Health		2305-6983	10.1136/fmch-2022-001608		We report the learnings gleaned from a four-country panel (Australia, South Africa, Egypt and Nigeria) sharing their countries' COVID-19 primary healthcare approaches and implementation of policy at the World Organization of Family Doctor's World virtual conference in November. The countries differ considerably with respect to size, national economies, average age, unemployment rates and proporti…	Apr-22	2022/9/20 11:15	2022/9/20 11:15		e001608		2	10		Fam. Med. Community Health								English							Place: London Publisher: Bmj Publishing Group WOS:000783710700001				health
5ZI9C76H	journalArticle	2022	Costello, Shawn M.; Shoemaker, Sophie R.; Hobbs, Helen T.; Nguyen, Annalee W.; Hsieh, Ching-Lin; Maynard, Jennifer A.; McLellan, Jason S.; Pak, John E.; Marqusee, Susan	The SARS-CoV-2 spike reversibly samples an open-trimer conformation exposing novel epitopes	Nature Structural & Molecular Biology		1545-9993	10.1038/s41594-022-00735-5		HDX-MS analysis reveals the SARS-CoV-2 spike ectodomain reversibly samples an open-trimer conformation that reveals epitopes for a pan-coronavirus antibody; interconversion with the prefusion conformation is modulated by temperature, ACE2 receptor binding, and sequence variants. Current COVID-19 vaccines and many clinical diagnostics are based on the structure and function of the SARS-CoV-2 spike…	Mar-22	2022/9/20 11:15	2022/9/20 11:15		229-+		3	29		Nat. Struct. Mol. Biol.								English							Place: Berlin Publisher: Nature Portfolio WOS:000763189700001				antibodies; mechanisms; protein; ace2; viral membrane-fusion
2VAW76P8	journalArticle	2022	Peacock, Stuart J.	Vaccine nationalism will persist: global public goods need effective engagement of global citizens	Globalization and Health			10.1186/s12992-022-00802-y		Covid-19 presents a unique opportunity to transform democratic engagement in the governance of global public goods. In this paper, I describe a global public goods framework and how it relates to Covid-19 vaccines, and summarize some of the global responses to Covid-19. I discuss some of the global threats to health and prosperity posed by the inequitable distribution of vaccines, and propose tra…	2022/2/12	2022/9/20 11:15	2022/9/20 11:15		14		1	18		Global. Health								English							Place: London Publisher: Bmc WOS:000754366600003				Covid-19; Vaccines; Citizen engagement; Global public goods; Governance; Public engagement; Vaccine nationalism
2ZRILZP7	journalArticle	2022	Tan, Sophia T.; Park, Hailey J.; Rodriguez-Barraquer, Isabel; Rutherford, George W.; Bibbins-Domingo, Kirsten; Schechter, Robert; Lo, Nathan C.	COVID-19 Vaccination and Estimated Public Health Impact in California	Jama Network Open		2574-3805	10.1001/jamanetworkopen.2022.8526		IMPORTANCE Despite widespread vaccination against COVID-19 in the United States, there are limited empirical data quantifying their public health impact in the population. OBJECTIVE To estimate the number of COVID-19 cases, hospitalizations, and deaths directly averted because of COVID-19 vaccination in California. DESIGN, SETTING, AND PARTICIPANTS This modeling study used person-level data provi…	2022/4/22	2022/9/20 11:15	2022/9/20 11:15		e228526		4	5		JAMA Netw. Open								English							Place: Chicago Publisher: Amer Medical Assoc WOS:000784873800004				advisory-committee; interim recommendation; united-states; hospitalizations
L45M7GL9	journalArticle	2022	Brugman, Alex	Dealing with a dog with cropped ears: how to discuss the issue with a client	In Practice		0263-841X			At your small animal practice, the first client of the day is an owner who comes in with an American bulldog puppy for vaccination. The owner explains that they recently bought the puppy from an online seller during one of the Covid-19 lockdowns as a companion for them while working extensively from home. You perform a clinical exam and the puppy is well, but you notice that it has cropped ears w…	Jan-22	2022/9/20 11:15	2022/9/20 11:15		61-62		1	44		In Practice								English							Place: Chichester Publisher: John Wiley & Sons Ltd WOS:000745075400010
946WPMGW	journalArticle	2022	Naleway, Allison L.; Grant, Lauren; Caban-Martinez, Alberto J.; Wesley, Meredith G.; Burgess, Jefferey L.; Groover, Kimberly; Gaglani, Manjusha; Yoon, Sarang K.; Tyner, Harmony L.; Meece, Jennifer; Kuntz, Jennifer L.; Yoo, Young M.; Schaefer-Solle, Natasha; Olsho, Lauren E. W.; Gerald, Joe K.; Rose, Spencer; Thiese, Matthew S.; Lundgren, Jessica; Groom, Holly C.; Mak, Josephine; Feliciano, Paola …	Incidence of SARS-CoV-2 infection among COVID-19 vaccinated and unvaccinated healthcare personnel, first responders, and other essential and frontline workers: Eight US locations, January-September 2021	Influenza and Other Respiratory Viruses		1750-2640	10.1111/irv.12956		Background We sought to evaluate the impact of changes in estimates of COVID-19 vaccine effectiveness on the incidence of laboratory-confirmed infection among frontline workers at high risk for SARS-CoV-2. Methods We analyzed data from a prospective frontline worker cohort to estimate the incidence of COVID-19 by month as well as the association of COVID-19 vaccination, occupation, demographics, …	May-22	2022/9/20 11:15	2022/9/20 11:15		585-593		3	16		Influenza Other Respir. Viruses								English							Place: Hoboken Publisher: Wiley WOS:000741936200001				SARS-CoV-2; vaccine; hospitalizations; essential worker
VJV6DRCP	journalArticle	2022	Lo Sasso, Bruna; Agnello, Luisa; Giglio, Rosaria Vincenza; Gambino, Caterina Maria; Ciaccio, Anna Maria; Vidali, Matteo; Ciaccio, Marcello	Longitudinal analysis of anti-SARS-CoV-2 S-RBD IgG antibodies before and after the third dose of the BNT162b2 vaccine	Scientific Reports		2045-2322	10.1038/s41598-022-12750-z		Immunosurveillance by evaluating anti-spike protein receptor-binding domain (S-RBD) antibodies represents a useful tool to estimate the long immunity against Severe Acute Respiratory Syndrome CoronaVirus 2 (SARS-CoV-2) infection. The aim of this study was to evaluate the kinetics of antibody response in vaccine recipients. We measured anti-S-RBD IgG levels by indirect chemiluminescence immunoassa…	2022/5/23	2022/9/20 11:15	2022/9/20 11:15		8679		1	12		Sci Rep								English							Place: Berlin Publisher: Nature Portfolio WOS:000799388600059				sars-cov-2; biomarkers; decay
SAMXX9YA	journalArticle	2022	Sutharattanapong, Napun; Thotsiri, Sansanee; Kantachuvesiri, Surasak; Wiwattanathum, Punlop	Benefits of Inactivated Vaccine and Viral Vector Vaccine Immunization on COVID-19 Infection in Kidney Transplant Recipients	Vaccines			10.3390/vaccines10040572		The coronavirus virus disease 2019 (COVID-19) pandemic has impacted the global healthcare system. In Thailand, the first and most available vaccines were inactivated and viral vector vaccines. We reported the impact of those vaccines in preventing severe disease and death in kidney transplant recipients. This retrospective study comprised 45 kidney transplant recipients with COVID-19 infection, c…	Apr-22	2022/9/20 11:15	2022/9/20 11:15		572		4	10		Vaccines								English							Place: Basel Publisher: Mdpi WOS:000785044400001				covid-19; inactivated vaccine; kidney transplantation; viral vector vaccine
B2YFBWK6	journalArticle	2022	Padoan, Andrea; Cosma, Chiara; della Rocca, Foscarina; Barbaro, Francesco; Santarossa, Claudia; Dall'Olmo, Luigi; Galla, Luisa; Cattelan, Annamaria; Cianci, Vito; Basso, Daniela; Plebani, Mario	A cohort analysis of SARS-CoV-2 anti-spike protein receptor binding domain (RBD) IgG levels and neutralizing antibodies in fully vaccinated healthcare workers	Clinical Chemistry and Laboratory Medicine		1434-6621	10.1515/cclm-2022-0322		Objectives The waning of humoral immunity after COVID-19 vaccine booster (third dose) has not yet been fully evaluated. This study updates data on anti-SARS-CoV-2 spike protein receptor binding domain (S-RBD) binding antibodies (bAb) and neutralizing antibodies (NAb) levels in individuals with homologous vaccination 3-4 months after receiving the booster dose. Methods Fifty-five healthcare worker…	2022/6/27	2022/9/20 11:15	2022/9/20 11:15		1110-1115		7	60		Clin. Chem. Lab. Med.								English							Place: Berlin Publisher: Walter De Gruyter Gmbh WOS:000787681700001				SARS-CoV-2; bnt162b2; antibody; neutralizing antibodies; serology; BNT162b2; 3 months after second dose; antibodies kinetic; SARS-CoV-2 mRNA vaccine; vaccine third dose
Y32TK77S	journalArticle	2022	Patrinos, Antonios; Komninos, Dimitris; Kartsonakis, Andreas; Serpanos, Dimitris; Tsolka, Niki; Stellas, Leonidas; Dimitropoulou, Dimitra	Small hospitals in battle against COVID-19: A single-center cohort study	Pneumon		1105-848X	10.18332/pne/145336		INTRODUCTION In Greece, higher morbidity and mortality due to COVID-19 pandemic were recorded during the third pandemic wave. Only a small percentage of the population was fully vaccinated at the beginning of the third pandemic wave. Our effort was multi-level, from the emergency room department to the ward. The aim of this article is to communicate a single secondary center's experience during t…	Mar-22	2022/9/20 11:15	2022/9/20 11:15		7		1	35		Pneumon								English							Place: Athens Publisher: Hellenic Bronchologic Soc WOS:000784372300002				covid-19; mortality; outcomes; hospital practice; non-invasive ventilation; sepsis; wait-and-see
8VXN6VVQ	journalArticle		Ekmekci, Perihan Elif; Guner, Muberra Devrim; Buruk, Banu; Gunes, Begum; Arda, Berna; Gorkey, Sefik	Challenges and practices arising during public health emergencies: A qualitative survey on ethics committees	Developing World Bioethics		1471-8731	10.1111/dewb.12345		The particular dynamics of public health emergencies urge scientists and Ethics Committee (EC) members to change and adapt their operating procedures to function effectively. Despite having previous pandemic experiences, ethics committees were unprepared to adapt to COVID-19 pandemic challenges. This survey aims to learn and thoroughly discuss the most salient issues for ECs during the COVID-19 p…		2022/9/20 11:15	2022/9/20 11:15							Dev. World Bioeth.								English							Place: Hoboken Publisher: Wiley WOS:000754313100001				covid-19; pandemic; ethics committees; public health ethics; public health emergency; Republic of Turkey; Turkey
AXSW3Z2Q	journalArticle	2022	Kahn, Kathleen; Pettifor, Audrey; Mataboge, Palesa; Kelly, Nicole K.; Mashinini, Duduzile P.; Nair, Harish; Campbell, Harry; Cohen, Cheryl; Gomez-Olive, F. Xavier; Tollman, Stephen	COVID-19 vaccine hesitancy in rural South Africa: Deepening understanding to increase uptake and access	Journal of Global Health		2047-2978	10.7189/jogh.32.05013		Background To date, COVID-19 vaccine coverage in the African region falls far too short of global goals. Increasing vaccination rates requires understanding barriers to vaccination so that effective interventions that sensitively and effectively address barriers to vaccination can be implemented. Methods To assess COVID-19 vaccination levels and identify major barriers to vaccine uptake we conduc…	2022	2022/9/20 11:15	2022/9/20 11:15					12		J. Glob. Health								English							Place: Edinburgh Publisher: Int Soc Global Health WOS:000800019600001				health
WZNAGI4V	journalArticle		Hussen, Bashdar Mahmud; Sabir, Dana Khdr; Karim, Yasin; Karim, Karzan Khawaraham; Hidayat, Hazha Jamal	Genome sequence analysis of SARS-COV-2 isolated from a COVID-19 patient in Erbil, Iraq	Applied Nanoscience		2190-5509	10.1007/s13204-021-02300-w		In the city of Wuhan, severe acute respiratory syndrome coronavirus 2 (SARS-CoV-2) was first recognized among humans at the end of December 2019, and has since spread to every country around the world. The emergence of this new coronavirus has attracted global attention to work towards finding a treatment and developing an effective vaccine against the virus. In this study, we sequence a full gen…		2022/9/20 11:15	2022/9/20 11:15							Appl. Nanosci.								English							Place: Heidelberg Publisher: Springer Heidelberg WOS:000751732000011				coronavirus; spike; sars-cov-2; mutations; genetics; COVID-19 patient; Genome sequence; Of SARS-COV-2 isolated; Transmission supported
Y54NGVCV	journalArticle	2022	Sah, Mukesh Kumar; Singh, Bishnu Mohan; Sinha, Puja; Devkota, Prerit; Yadav, Sudhira Kumari; Shrestha, John; Shrestha, Ashis	Superficial venous thrombosisas a possible consequence of ChAdOx1 nCoV-19 vaccine: two case reports	Journal of Medical Case Reports			10.1186/s13256-022-03407-6		Background Many scientists across the world got involved in the race to develop successful anti-SARS-CoV-2 vaccines to overcome COVID-19 pandemic. Among the different vaccines developed against SARS-CoV-2, Covishield was the first vaccine approved for emergency use in Nepal. We report two cases of Superficial Vein Thrombosis (SVT) for the first time in the literature after vaccination with the Ch…	2022/5/7	2022/9/20 11:15	2022/9/20 11:15		182		1	16		J. Med. Case Rep.								English							Place: London Publisher: Bmc WOS:000791771800001				covid-19; covid 19; ChAdOx1 nCoV-19; Covishield vaccine; Superficial saphenous vein (SSV); Superficial venous thrombosis (SVT); vein-thrombosis; Venous thrombosis
T6QIDWPH	journalArticle	2022	Perez-Then, Eddy; Lucas, Carolina; Monteiro, Valter Silva; Miric, Marija; Brache, Vivian; Cochon, Leila; Vogels, Chantal B. F.; Malik, Amyn A.; De la Cruz, Elena; Jorge, Aidelis; De los Santos, Margarita; Leon, Patricia; Breban, Mallery; Billig, Kendall; Yildirim, Inci; Pearson, Claire; Downing, Randy; Gagnon, Emily; Muyombwe, Anthony; Razeq, Jafar; Campbell, Melissa; Ko, Albert; Omer, Saad B.; G…	Neutralizing antibodies against the SARS-CoV-2 Delta and Omicron variants following heterologous CoronaVac plus BNT162b2 booster vaccination	Nature Medicine		1078-8956	10.1038/s41591-022-01705-6		The recent emergence of the SARS-CoV-2 Omicron variant is raising concerns because of its increased transmissibility and its numerous spike mutations, which have the potential to evade neutralizing antibodies elicited by COVID-19 vaccines. Here we evaluated the effects of a heterologous BNT162b2 mRNA vaccine booster on the humoral immunity of participants who had received a two-dose regimen of Co…	Mar-22	2022/9/20 11:15	2022/9/20 11:15		481-+		3	28		Nat. Med.								English							Place: Berlin Publisher: Nature Portfolio WOS:000764509000001
QI827EED	journalArticle	2022	Curran, Desmond; La, Elizabeth M.; Salem, Ahmed; Singer, David; Lecrenier, Nicolas; Poston, Sara	Modeled impact of the COVID-19 pandemic and associated reduction in adult vaccinations on herpes zoster in the United States	Human Vaccines & Immunotherapeutics		2164-5515	10.1080/21645515.2022.2027196		Due to COVID-19, vaccinations dropped in 2020 and 2021. We estimated the impact of reduced recombinant zoster vaccine (RZV) use on herpes zoster (HZ) cases, complications, and quality-adjusted life-year (QALY) losses among older adults. Various scenarios were compared with Markov models using data from national sources, clinical trials, and literature. Missed series initiations were calculated ba…	2022/12/31	2022/9/20 11:15	2022/9/20 11:15				1	18		Human Vaccines Immunother.								English							Place: Philadelphia Publisher: Taylor & Francis Inc WOS:000745541000001				covid-19; vaccine; public health; efficacy; immunization; herpes zoster; pain; postherpetic neuralgia; recombinant zoster vaccine; shingles; subunit vaccine
X3QAM866	journalArticle	2022	Matsuda, Elaine Monteiro; de Oliveira, Isabela Penteriche; de Campos, Ivana Barros; Ahagon, Cintia Mayumi; Castejon, Marcia Jorge; Silva, Valeria Oliveira; Manzoni, Fernanda Matsuda; Lopez-Lopes, Giselle Ibette; Brigido, Luis Fernando de Macedo	SARS-CoV-2 testing among patients and healthcare professionals in an HIV outpatient clinic in Brazil	Revista Do Instituto De Medicina Tropical De Sao Paulo		0036-4665	10.1590/S1678-9946202264003		The COVID-19 pandemic in Brazil has been marked by high infection and death rates. The immune response generated by current vaccination might be influenced by previous natural infection, and baseline estimates may help in the evaluation of vaccine-induced serological response. We evaluated previous SARS-CoV-2 testing (RT-PCR), and performed rapid diagnostic tests (RDT) and high throughput electro…	2022	2022/9/20 11:15	2022/9/20 11:15		e3			64		Rev. Inst. Med. Trop. Sao Paulo								English							Place: Sao Paulo Publisher: Inst Medicina Tropical Sao Paulo WOS:000754065000002				SARS-CoV-2; Prevalence; hiv; Health care personals; pep; PrEP
8GRN7WDM	journalArticle	2022	Quer, Giorgio; Gadaleta, Matteo; Radin, Jennifer M.; Andersen, Kristian G.; Baca-Motes, Katie; Ramos, Edward; Topol, Eric J.; Steinhubl, Steven R.	Inter-individual variation in objective measure of reactogenicity following COVID-19 vaccination via smartwatches and fitness bands	Npj Digital Medicine		2398-6352	10.1038/s41746-022-00591-z		The ability to identify who does or does not experience the intended immune response following vaccination could be of great value in not only managing the global trajectory of COVID-19 but also helping guide future vaccine development. Vaccine reactogenicity can potentially lead to detectable physiologic changes, thus we postulated that we could detect an individual's initial physiologic respons…	2022/4/19	2022/9/20 11:15	2022/9/20 11:15		49		1	5		npj Digit. Med.								English							Place: Berlin Publisher: Nature Portfolio WOS:000784970500001				advisory-committee; united-states; fever; immunogenicity; adults; practices interim recommendation; sleep
WUA5LVGS	journalArticle	2022	Arora, Geetika; Taneja, Jyoti; Bhardwaj, Priya; Goyal, Shorya; Naidu, Kumar; Yadav, Sunita K.; Saluja, Daman; Jetly, Sunita	Adverse events and breakthrough infections associated with COVID-19 vaccination in the Indian population	Journal of Medical Virology		0146-6615	10.1002/jmv.27708		Vaccines against COVID-19 provide immunity to deter severe morbidities associated with the infection. However, it does not prevent infection altogether in all exposed individuals. Furthermore, emerging variants of SARS-CoV-2 impose a threat concerning the competency of the vaccines in combating the infection. This study aims to determine the variability in adverse events and the extent of breakth…	Jul-22	2022/9/20 11:15	2022/9/20 11:15		3147-3154		7	94		J. Med. Virol.								English							Place: Hoboken Publisher: Wiley WOS:000770958400001				covid-19; SARS-CoV-2; sars; sex; expression; adverse-events; breakthrough infections
NMSZHBHQ	journalArticle	2022	Zhou, Xingzuo; Li, Yiang	Forecasting the COVID-19 vaccine uptake rate: an infodemiological study in the US	Human Vaccines & Immunotherapeutics		2164-5515	10.1080/21645515.2021.2017216		A year following the initial COVID-19 outbreak in China, many countries have approved emergency vaccines. Public-health practitioners and policymakers must understand the predicted populational willingness for vaccines and implement relevant stimulation measures. This study developed a framework for predicting vaccination uptake rate based on traditional clinical data - involving an autoregressiv…	2022/12/31	2022/9/20 11:15	2022/9/20 11:15				1	18		Human Vaccines Immunother.								English							Place: Philadelphia Publisher: Taylor & Francis Inc WOS:000744712900001				vaccine; Public health; forecast; google; infodemiology; machine-learning
IHAT6QMM	journalArticle	2022	Geller, Andrew; Budnitz, Daniel S.; Dubendris, Heather; Gharpure, Radhika; Soe, Minn; Wu, Hsiu; Kalayil, Elizabeth J.; Benin, Andrea L.; Patel, Suchita A.; Lindley, Megan C.; Link-Gelles, Ruth	Surveillance of COVID-19 Vaccination in Nursing Homes, United States, December 2020-July 2021	Public Health Reports		0033-3549	10.1177/00333549211066168		Monitoring COVID-19 vaccination coverage among nursing home residents and staff is important to ensure high coverage rates and guide patient-safety policies. With the termination of the federal Pharmacy Partnership for Long-Term Care Program, another source of facility-based vaccination data is needed. We compared numbers of COVID-19 vaccinations administered to nursing home residents and staff r…	Mar-22	2022/9/20 11:15	2022/9/20 11:15		239-243		2	137		Public Health Rep.								English							Place: Thousand Oaks Publisher: Sage Publications Inc WOS:000753848700001				covid-19; surveillance; vaccination; residents; nursing home; staff members
LLQ66A5N	journalArticle	2022	Yu, Yunkai; Esposito, Dominic; Kang, Zhigang; Lu, Jianming; Remaley, Alan T.; De Giorgi, Valeria; Chen, Leonard N.; West, Kamille; Cao, Liang	mRNA vaccine-induced antibodies more effective than natural immunity in neutralizing SARS-CoV-2 and its high affinity variants	Scientific Reports		2045-2322	10.1038/s41598-022-06629-2		Several variants of SARS-CoV-2 have emerged. Those with mutations in the angiotensin-converting enzyme (ACE2) receptor binding domain (RBD) are associated with increased transmission and severity. In this study, we developed both antibody quantification and functional neutralization assays. Analyses of both COVID-19 convalescent and diagnostic cohorts strongly support the use of RBD antibody leve…	2022/2/16	2022/9/20 11:15	2022/9/20 11:15		2628		1	12		Sci Rep								English							Place: Berlin Publisher: Nature Portfolio WOS:000757107700046				infection
N8V85IF6	journalArticle	2022	To, Kelvin Kai-Wang; Li, Xin; Lung, David Christopher; Ip, Jonathan Daniel; Chan, Wan-Mui; Chu, Allen Wing-Ho; Yip, Cyril Chik-Yan; Chen, Jonathan H. K.; Poon, Rosana Wing-Shan; Tsoi, Hoi-Wah; Lai, Raymond Wai-Man; To, Wing-Kin; Ren, Lili; Li, Mingkun; Cao, Yunlong; Xie, Xiaoliang Sunney; Jin, Dong-Yan; Yuen, Kwok-Yung	False Coronavirus Disease 2019 Cases due to Contamination by Inactivated Virus Vaccine	Clinical Infectious Diseases		1058-4838	10.1093/cid/ciab684		A false-positive severe acute respiratory syndrome coronavirus 2 (SARS-CoV-2) reverse-transcription polymerase chain reaction result can lead to unnecessary public health measures. We report 2 individuals whose respiratory specimens were contaminated by an inactivated SARS-CoV-2 vaccine strain (CoronaVac), likely at vaccination premises. Incidentally, whole genome sequencing of CoronaVac showed a…	2022/4/28	2022/9/20 11:15	2022/9/20 11:15		1485-1488		8	74		Clin. Infect. Dis.								English							Place: Cary Publisher: Oxford Univ Press Inc WOS:000788258900021				contamination; false positive; inactivated COVID-19 vaccine
UMPJ8K2H	journalArticle	2022	Xiong, Xi; Wong, Carlos King Ho; Au, Ivan Chi Ho; Lai, Francisco Tsz Tsun; Li, Xue; Wan, Eric Yuk Fai; Chui, Celine Sze Ling; Chan, Esther Wai Yin; Cheng, Franco Wing Tak; Lau, Kristy Tsz Kwan; Lee, Chi Ho; Woo, Yu Cho; Lui, David Tak Wai; Wong, Ian Chi Kei	Safety of Inactivated and mRNA COVID-19 Vaccination Among Patients Treated for Hypothyroidism: A Population-Based Cohort Study	Thyroid		1050-7256	10.1089/thy.2021.0684		Background: Thyroiditis and Graves' disease have been reported after coronavirus disease 2019 (COVID-19) vaccination. We evaluated the risks of adverse events after COVID-19 vaccination among patients treated for hypothyroidism.Methods: In this retrospective population-based cohort study of Hong Kong Hospital Authority electronic health records with the Department of Health vaccination records li…	2022/5/1	2022/9/20 11:15	2022/9/20 11:15		505-514		5	32		Thyroid								English							Place: New Rochelle Publisher: Mary Ann Liebert, Inc WOS:000786606300001				vaccines; COVID-19 vaccines; association; BNT162b2 vaccine; hypothyroidism; inactivated; thyroxine
9T5MSECW	journalArticle	2022	Jara, Luis J.; Vera-Lastra, Olga; Mahroum, Naim; Pineda, Carlos; Shoenfeld, Yehuda	Autoimmune post-COVID vaccine syndromes: does the spectrum of autoimmune/inflammatory syndrome expand?	Clinical Rheumatology		0770-3198	10.1007/s10067-022-06149-4		To date, around 60% of the world population has been protected by vaccines against SARS-CoV-2, significantly reducing the devastating effect of the pandemic and restoring social economic activity through mass vaccination. Multiple studies have demonstrated the effectiveness and safety of vaccines against COVID-19 in healthy populations, in people with risk factors, in people with or without SARS-…	May-22	2022/9/20 11:15	2022/9/20 11:15		1603-1609		5	41		Clin. Rheumatol.								English							Place: London Publisher: Springer London Ltd WOS:000778087400001				COVID-19 vaccine; Autoimmune diseases; Adverse event vaccine; Autoimmune/inflammatory syndrome induced by adjuvants (ASIA syndrome); Autoimmunity
J7RPH6CK	journalArticle	2022	Kaufman, Jessica; Bagot, Kathleen L.; Hoq, Monsurul; Leask, Julie; Seale, Holly; Biezen, Ruby; Sanci, Lena; Manski-Nankervis, Jo-Anne; Bell, J. Simon; Munro, Jane; Jos, Carol; Ong, Darren Suryawijaya; Oliver, Jane; Tuckerman, Jane; Danchin, Margie	Factors Influencing Australian Healthcare Workers' COVID-19 Vaccine Intentions across Settings: A Cross-Sectional Survey	Vaccines			10.3390/vaccines10010003		Healthcare workers' COVID-19 vaccination coverage is important for staff and patient safety, workforce capacity and patient uptake. We aimed to identify COVID-19 vaccine intentions, factors associated with uptake and information needs for healthcare workers in Victoria, Australia. We administered a cross-sectional online survey to healthcare workers in hospitals, primary care and aged or disabili…	Jan-22	2022/9/20 11:15	2022/9/20 11:15		3		1	10		Vaccines								English							Place: Basel Publisher: Mdpi WOS:000748241800001				vaccination; coronavirus; vaccine acceptance; communication; immunization
WLYVUMN8	journalArticle		Mahimbo, Abela; Kang, Melissa; Sestakova, Lidija; Smith, Mitchell; Dawson, Angela	Factors influencing refugees' willingness to accept COVID-19 vaccines in Greater Sydney: a qualitative study	Australian and New Zealand Journal of Public Health		1326-0200	10.1111/1753-6405.13252		Objectives: Achieving high vaccination coverage is a critical strategy to reducing the spread of COVID-19 infection. This study, undertaken before the Delta variant outbreak, aimed to understand potential drivers and barriers influencing COVID-19 vaccine uptake for refugees. Methods: Four focus group interviews were conducted with 37 refugees from four language groups (Arabic, Dari, Dinka and Kar…		2022/9/20 11:15	2022/9/20 11:15							Aust. N. Z. Publ. Health								English							Place: Hoboken Publisher: Wiley WOS:000793931000001				vaccination; qualitative study; COVID-19 vaccines; challenges; barriers; australia; community engagement; focus; Health Belief Model; health-care; refugees; vaccination drivers and barriers
SL97T9WA	journalArticle	2022	Knowlton, Kirk U.; Knight, Stacey; Muhlestein, Joseph B.; Le, Viet T.; Horne, Benjamin D.; May, Heidi T.; Stenehjem, Edward A.; Anderson, Jeffrey L.	A Small but Significantly Greater Incidence of Inflammatory Heart Disease Identified After Vaccination for Severe Acute Respiratory Syndrome Coronavirus 2	Open Forum Infectious Diseases		2328-8957	10.1093/ofid/ofab663		Background Severe acute respiratory syndrome coronavirus 2 (SARS-CoV-2) vaccines are being administered on an unprecedented scale. Assessing the risks of side effects is needed to aid clinicians in early detection and treatment. This study examined the risk of inflammatory heart disease, including pericarditis and myocarditis, after SARS-CoV-2 vaccination. Methods Intermountain Healthcare patient…	2022/3/1	2022/9/20 11:15	2022/9/20 11:15		ofab663		3	9		Open Forum Infect. Dis.								English							Place: Cary Publisher: Oxford Univ Press Inc WOS:000753114000023				covid-19; SARS-CoV-2; united-states; vaccination; myocarditis; pericarditis
TYKD75BF	journalArticle	2022	Khamees, Almu'atasim; Bani-Issa, Jamal; Al Zoubi, Mazhar Salim; Qasem, Taqwa; AbuAlArjah, Manal Issam; Alawadin, Sura Ahmad; Al-Shami, Khayry; Hussein, Farah E.; Hussein, Emad; Bashayreh, Ibrahim H.; Tambuwala, Murtaza M.; Al-Saghir, Mohannad; Cornelison, Christopher T.	SARS-CoV-2 and Coronavirus Disease Mitigation: Treatment Options, Vaccinations and Variants	Pathogens			10.3390/pathogens11020275		COVID-19 is caused by a novel coronavirus (2019-nCoV), which was declared as a pandemic after it emerged in China 2019. A vast international effort has been conducted to prevent and treat COVID-19 due to its high transmissibility and severe morbidity and mortality rates, particularly in individuals with chronic co-morbidities. In addition, polymorphic variants increased the need for proper vaccin…	Feb-22	2022/9/20 11:15	2022/9/20 11:15		275		2	11		Pathogens								English							Place: Basel Publisher: Mdpi WOS:000763235800001				covid-19; pandemic; safety; interferon; vaccines; efficacy; chadox1 ncov-19; variants; spike protein; 2019-nCoV; cov; in-vitro; respiratory syndrome-coronavirus; severe covid-19; vaccine candidate
WQEFXLJW	journalArticle	2022	Murthy, Seema; Sawant, Meenal; Doreswamy, Sahana Sadholalu; Pothula, Sateesh Chandra; Yan, Shirley Du; Pathani, Tanmay Singh; Thakur, Deepali; Vemuri, Srikrishna Rajarama Sastry; Upadhyaya, Sanjeev; Alam, Shahed; Alimelu, Madireddy; Singh, Himabindu	Supporting Immunization Uptake during a Pandemic, Using Remote Phone Call Intervention among Babies Discharged from a Special Neonatal Care Unit (SNCU) in South India	Vaccines			10.3390/vaccines10040507		COVID-19 has impacted children's immunization rates, putting the lives of children at risk. The present study assesses the impact of phone-call counseling, on immunization uptake during the pandemic. Families of babies discharged from the SNCUs in six government centers in three South Indian states were recruited. Calls were made 10 days after the immunization due date. Missed vaccinees were coun…	Apr-22	2022/9/20 11:15	2022/9/20 11:15		507		4	10		Vaccines								English							Place: Basel Publisher: Mdpi WOS:000787969300001				covid-19; covid; children; childhood immunization; immunization uptake; prevent influenza transmission; SNCU babies
GBHJJSEL	journalArticle	2022	Ziakas, Panayiotis D.; Kourbeti, Irene S.; Mylonakis, Eleftherios	Comparative Analysis of Mortality From Coronavirus Disease 2019 Across the European Union Countries and the Effects of Vaccine Coverage	Open Forum Infectious Diseases		2328-8957	10.1093/ofid/ofac006		Background Mortality is a critical measure of disease impact. The European Union (EU) countries share the same regulatory framework but different implementation policies. Methods We extracted cumulative COVID-19 mortality data across the EU countries. We evaluated the 27 member states using the location quotient (LQ) to adjust for the expected mortality in the whole EU region, where an LQ 1 a les…	2022/3/1	2022/9/20 11:15	2022/9/20 11:15		ofac006		3	9		Open Forum Infect. Dis.								English							Place: Cary Publisher: Oxford Univ Press Inc WOS:000753114000022				covid-19; SARS-CoV-2; vaccine; mortality; coronavirus; Europe; location quotient; trends
LGSJM8DY	journalArticle		de Miguel Beriain, Inigo	Mandatory vaccination and the 'seat belt analogy' argument: a critical analysis in the context of the Covid-19 pandemic	Medicine Health Care and Philosophy		1386-7423	10.1007/s11019-022-10068-1		The seat belt analogy argument is aimed at furthering the success of coercive vaccination efforts on the basis that the latter is similar to compulsory use of seat belts. However, this article demonstrated that this argument does not work so well in practice due to several reasons. The possibility of saving resources in health care does not usually apply in our societies, and the paternalist ment…		2022/9/20 11:15	2022/9/20 11:15							Med. Health Care Philos.								English							Place: Dordrecht Publisher: Springer WOS:000752156700001				Coercive vaccination; Compulsory vaccination; Mandatory vaccination; Seat belt analogy; Vaccination systems
6NVX3DYZ	journalArticle	2022	Berguer, Paula M.; Blaustein, Matias; Bredeston, Luis M.; Craig, Patricio O.; D'Alessio, Cecilia; Elias, Fernanda; Farre, Paola C.; Fernandez, Natalia B.; Gentili, Hernan G.; Gandola, Yamila B.; Gasulla, Javier; Gudesblat, Gustavo E.; Herrera, Maria G.; Ibanez, Lorena I.; Idrovo-Hidalgo, Tommy; Nadra, Alejandro D.; Noseda, Diego G.; Pavan, Carlos H.; Pavan, Maria F.; Pignataro, Maria F.; Roman, E…	Covalent coupling of Spike's receptor binding domain to a multimeric carrier produces a high immune response against SARS-CoV-2	Scientific Reports		2045-2322	10.1038/s41598-021-03675-0		The receptor binding domain (RBD) of the Spike protein from SARS-CoV-2 is a promising candidate to develop effective COVID-19 vaccines since it can induce potent neutralizing antibodies. We have previously reported the highly efficient production of RBD in Pichia pastoris, which is structurally similar to the same protein produced in mammalian HEK-293T cells. In this work we designed an RBD multi…	2022/1/13	2022/9/20 11:15	2022/9/20 11:15		692		1	12		Sci Rep								English							Place: Berlin Publisher: Nature Portfolio WOS:000742412100048				protein; lumazine synthase; nanoparticles
87KWZ8QK	journalArticle	2022	Nittayasoot, Natthaprang; Thammawijaya, Panithee; Tharmaphornpilas, Piyanit; Sansilapin, Chalo; Jiraphongsa, Chuleeporn; Suphanchaimat, Rapeepong	Rapid method through routine data to evaluate real-world vaccine effectiveness against coronavirus disease 2019 (COVID-19) infection: lessons from Thailand	Health Research Policy and Systems		1478-4505	10.1186/s12961-022-00821-6		The objective of this article is to draw lessons from the Thai experience in estimating vaccine effectiveness (VE) for coronavirus disease 2019 (COVID-19) based on routine service data. We found that a matched case-control design, using probability-based controls representing the varying vaccine coverage across the population over time, yielded a valid result for VE assessment. The proposed desig…	2022/3/9	2022/9/20 11:15	2022/9/20 11:15		29		1	20		Health Res. Policy Syst.								English							Place: London Publisher: Bmc WOS:000766570700001				Case-control; Coronavirus disease 2019; Thailand; Vaccine effectiveness
MGRIBMFG	journalArticle		Jung, Min Kyung; Jeong, Seong Dong; Noh, Ji Yun; Kim, Dong-Uk; Jung, Sungmin; Song, Joon Young; Jeong, Hye Won; Park, Su-Hyung; Shin, Eui-Cheol	BNT162b2-induced memory T cells respond to the Omicron variant with preserved polyfunctionality	Nature Microbiology		2058-5276	10.1038/s41564-022-01123-x		An analysis of memory T cells induced by messenger RNA vaccination reveals that they maintain polyfunctionality in response to the Omicron spike protein. The Omicron variant (B.1.1.529) of severe acute respiratory syndrome coronavirus 2 (SARS-CoV-2) extensively escapes neutralizing antibodies elicited by SARS-CoV-2 infection or vaccination. In the present study, we investigated whether BNT162b2 m…		2022/9/20 11:15	2022/9/20 11:15							NAT. MICROBIOL								English							Place: Berlin Publisher: Nature Portfolio WOS:000796344200002				reactivity
M4Y6XBYZ	journalArticle	2022	Zhou, De; Zhou, Man	Mathematical Model and Optimization Methods of Wide-Scale Pooled Sample Testing for COVID-19	Mathematics			10.3390/math10071183		Currently, coronavirus disease 2019 (COVID-19) has become the most severe infectious disease affecting the world, which has spread around the world to more than 200 countries in 2020. Until the number of COVID-19 vaccines is insufficient, nucleic acid testing is considered as an effective way to screen virus carriers and control the spread of the virus. Considering that the medical resources and …	Apr-22	2022/9/20 11:15	2022/9/20 11:15		1183		7	10		Mathematics								English							Place: Basel Publisher: Mdpi WOS:000781337200001				covid-19; individual-sample testing; mass testing; nucleic acid testing; pooled testing; pooling strategies; probabilistic analysis
V3RXKEXK	journalArticle		Arowolo, Micheal Olaolu; Ogundokun, Roseline Oluwaseun; Misra, Sanjay; Agboola, Blessing Dorothy; Gupta, Brij	Machine learning-based IoT system for COVID-19 epidemics	Computing		0010-485X	10.1007/s00607-022-01057-6		The planet earth has been facing COVID-19 epidemic as a challenge in recent time. It is predictable that the world will be fighting the pandemic by taking precautions steps before an operative vaccine is found. The IoT produces huge data volumes, whether private or public, through the invention of IoT devices in the form of smart devices with an improved rate of IoT data generation. A lot of devi…		2022/9/20 11:15	2022/9/20 11:15							Computing								English							Place: Wien Publisher: Springer Wien WOS:000762855200002				covid-19; prediction; abc; internet; IoT; Machine learning; svm
MHYTPZRJ	journalArticle	2022	Kreuter, Matthew W.; Garg, Rachel; Marsh, Alexis; Thompson, Tess; Caburnay, Charlene; Teshome, Enguday; Kulkarni, Saneel; Tanpattana, Thidaporn; Wolff, Jennifer; McQueen, Amy	Intention to vaccinate children for COVID-19: A segmentation analysis among Medicaid parents in Florida	Preventive Medicine		0091-7435	10.1016/j.ypmed.2022.106959		COVID-19 vaccines have been granted emergency use authorization for children ages 5 years and older. To understand how racially and ethnically diverse parents of young children enrolled in Medicaid feel about a prospective COVID-19 vaccine for their children, we administered an online survey that included both close ended and open-ended items to a statewide sample in Florida (n = 1951). We used q…	Mar-22	2022/9/20 11:15	2022/9/20 11:15		106959			156		Prev. Med.								English							Place: San Diego Publisher: Academic Press Inc Elsevier Science WOS:000779305300005				covid-19; Vaccination; strategies; health; Children; Health communication; Medicaid
MBEIYJ92	journalArticle	2022	Amir, Ofra; Goldberg, Yair; Mandel, Micha; Bar-On, Yinon M.; Bodenheimer, Omri; Ash, Nachman; Alroy-Preis, Sharon; Huppert, Amit; Milo, Ron	Protection following BNT162b2 booster in adolescents substantially exceeds that of a fresh 2-dose vaccine	Nature Communications			10.1038/s41467-022-29578-w		Israel began administering a BNT162b2 booster dose to restore protection following the waning of the 2-dose vaccine. Biological studies have shown that a "fresh" booster dose leads to increased antibody levels compared to a fresh 2-dose vaccine, which may suggest increased effectiveness. To compare the real-world effectiveness of a fresh (up to 60 days) booster dose with that of a fresh 2-dose va…	2022/4/13	2022/9/20 11:15	2022/9/20 11:15		1971		1	13		Nat. Commun.								English							Place: Berlin Publisher: Nature Portfolio WOS:000783759500007
YJKPD79H	journalArticle	2022	Morris, C. Paul; Luo, Chun Huai; Sachithanandham, Jaiprasath; Li, Maggie; Schwartz, Matthew; Gaston, David C.; Gniazdowski, Victoria; Giraldo-Castillo, Nicolas; Amadi, Adannaya; Norton, Julie M.; Wright, William F.; Klein, Eili Y.; Pekosz, Andrew; Mostafa, Heba H.	Large Scale SARS-CoV-2 Molecular Testing and Genomic Surveillance Reveal Prolonged Infections, Protracted RNA shedding, and Viral Reinfections	Frontiers in Cellular and Infection Microbiology		2235-2988	10.3389/fcimb.2022.809407		Large-scale SARS-CoV-2 molecular testing coupled with whole genome sequencing in the diagnostic laboratories is instrumental for real-time genomic surveillance. The extensive genomic, laboratory, and clinical data provide a valuable resource for understanding cases of reinfection versus prolonged RNA shedding and protracted infections. In this study, data from a total of 22,292 clinical specimens…	2022/4/11	2022/9/20 11:15	2022/9/20 11:15		809407			12		Front. Cell. Infect. Microbiol.								English							Place: Lausanne Publisher: Frontiers Media Sa WOS:000791818200001				SARS-CoV-2; reinfection; variants; performance; prolonged infection; prolonged shedding
IMVUUM59	journalArticle	2022	Nagar, Sarosh; Ashaye, Tomi	A Shot of Faith-Analyzing Vaccine Hesitancy in Certain Religious Communities in the United States	American Journal of Health Promotion		0890-1171	10.1177/08901171211069547		Vaccine hesitancy in the United States continues to hamper ongoing coronavirus vaccination efforts. One set of populations with higher-than-average initial rates of vaccine hesitancy are certain religious groups, such as white evangelicals, African-American Protestants, and Hispanic Catholics. This article discusses the reasons underlying vaccine hesitancy in these populations, focusing on new tr…	Jun-22	2022/9/20 11:15	2022/9/20 11:15		765-767		5	36		Am. J. Health Promot.								English							Place: Thousand Oaks Publisher: Sage Publications Inc WOS:000739442700001				disease management; faith and health; health policy < opportunity < strategies; interventions; specific populations
2CY282RP	journalArticle	2022	Ullah, Mohammad Sharif; Higazy, M.; Kabir, K. M. Ariful	Modeling the epidemic control measures in overcoming COVID-19 outbreaks: A fractional-order derivative approach	Chaos Solitons & Fractals		0960-0779	10.1016/j.chaos.2021.111636		Novel coronavirus named SARS-CoV-2 is one of the global threads and uncertain challenges worldwide faced at present. It has stroke rapidly around the globe due to viral transmissibility, new variants (strains), and human unconsciousness. Lack of adequate and reliable vaccination and proper treatment, control measures such as self-protection, physical distancing, lockdown, quarantine, and isolatio…	Feb-22	2022/9/20 11:15	2022/9/20 11:15		111636			155		Chaos Solitons Fractals								English							Place: Oxford Publisher: Pergamon-Elsevier Science Ltd WOS:000784334900011				covid-19; information; caputo; Caputo fractional-order derivative; Control measures; Infectious diseases
DY48G6CJ	journalArticle	2022	Kalman, Judy	"We don't vaccinate foreigners": Promoting critical literacy through understanding disputed meanings inofficial documents	Journal for Critical Education Policy Studies		2051-0969			In this article, I note an observable social turn in languages arts curricula in Latin America. However, I argue that the effort to contextualize written language and bring everyday uses of writing into the classroom falls short of promoting a critical understanding of some key aspects of how literacies work. To do this, I analyze a recent incident relating to the validity of some official docume…	Apr-22	2022/9/20 11:15	2022/9/20 11:15		224-248		1	20		J. Crit. Educ. Policy Stud.								English							Place: Northampton Publisher: Inst Education Policy Studies WOS:000786646500010				Covid; Mexico; New Literacy Studies; Paperwork; Social Practice
5CC6HSEC	journalArticle	2022	De Meyer, Emiel; Van Damme, Patrick; de la Pena, Eduardo; Ceuterick, Melissa	'A disease like any other' traditional, complementary and alternative medicine use and perspectives in the context of COVID-19 among the Congolese community in Belgium	Journal of Ethnobiology and Ethnomedicine			10.1186/s13002-022-00530-y		Background As a hard-hit area during the COVID-19 pandemic, Belgium knew the highest mortality among people from sub-Saharan African descent, compared to any other group living in the country. After migration, people often maintain traditional perceptions and habits regarding health and healthcare, resulting in a high prevalence of traditional, complementary and alternative medicine use among dif…	2022/4/7	2022/9/20 11:15	2022/9/20 11:15		29		1	18		J. Ethnobiol. Ethnomed.								English							Place: London Publisher: Bmc WOS:000779354900002				covid-19; health; care; trust; african; antimalarial activity; Belgium; Congolese community; malaria therapy; migrants; networks; plants; tuskegee; Urban ethnobotany
8TC6UJKX	journalArticle	2022	Halasa, Natasha B.; Olson, Samantha M.; Staat, Mary A.; Newhams, Margaret M.; Price, Ashley M.; Boom, Julie A.; Sahni, Leila C.; Cameron, Melissa A.; Pannaraj, Pia S.; Bline, Katherine E.; Bhumbra, Samina S.; Bradford, Tamara T.; Chiotos, Kathleen; Coates, Bria M.; Cullimore, Melissa L.; Cvijanovich, Natalie Z.; Flori, Heidi R.; Gertz, Shira J.; Heidemann, Sabrina M.; Hobbs, Charlotte; Hume, Jane…	Effectiveness of Maternal Vaccination with mRNA COVID-19 Vaccine During Pregnancy Against COVID-19-Associated Hospitalization in Infants Aged < 6 Months-17 States, July 2021-January 2022	Mmwr-Morbidity and Mortality Weekly Report		0149-2195				2022/2/18	2022/9/20 11:15	2022/9/20 11:15		264-270		7	71		MMWR-Morb. Mortal. Wkly. Rep.								English							Place: Atlanta Publisher: Centers Disease Control & Prevention WOS:000757992400001
V78VNBN3	journalArticle	2022	Mahmood, Ahlam Fadhil; Mahmood, Saja Waleed	Cough/X-ray/CT (CXC) website for testing COVID-19 and auto-informing results	Review of Scientific Instruments		0034-6748	10.1063/5.0076314		Despite the development of vaccines and the emergence of various treatments for COVID-19, the number of confirmed cases of the coronavirus disease (COVID-19) is increasing worldwide, and it is unlikely that the disease will ever disappear completely. Having a non-contact remote testing system can improve the workload of health-care centers and contribute to reducing the infection by recommending …	2022/1/1	2022/9/20 11:15	2022/9/20 11:15		13705		1	93		Rev. Sci. Instrum.								English							Place: Melville Publisher: AIP Publishing WOS:000748892400004
XHMESVMY	journalArticle	2022	Song, Yabin; Deng, Yongqiang; Wang, Huiqiang; Bei, Zhuchun; Gu, Hongjing; Zhao, Hui; Wang, Hong; Zhang, Dongna; Xu, Likun; Wang, Baogang; Li, Yuhuan; Wang, Hongquan	Naphthoquine: A Potent Broad-Spectrum Anti-Coronavirus Drug In Vitro	Molecules			10.3390/molecules27030712		COVID-19 has spread around the world and caused serious public health and social problems. Although several vaccines have been authorized for emergency use, new effective antiviral drugs are still needed. Some repurposed drugs including Chloroquine, Hydroxychloroquine and Remdesivir were immediately used to treat COVID-19 after the pandemic. However, the therapeutic effects of these drugs have no…	Feb-22	2022/9/20 11:15	2022/9/20 11:15		712		3	27		Molecules								English							Place: Basel Publisher: Mdpi WOS:000755340400001				SARS-CoV-2; coronavirus; malaria; Naphthoquine; repurposing
QEAGDQ5T	journalArticle	2022	Oster, Matthew E.; Shay, David K.; Su, John R.; Gee, Julianne; Creech, C. Buddy; Broder, Karen R.; Edwards, Kathryn; Soslow, Jonathan H.; Dendy, Jeffrey M.; Schlaudecker, Elizabeth; Lang, Sean M.; Barnett, Elizabeth D.; Ruberg, Frederick L.; Smith, Michael J.; Campbell, M. Jay; Lopes, Renato D.; Sperling, Laurence S.; Baumblatt, Jane A.; Thompson, Deborah L.; Marquez, Paige L.; Strid, Penelope; W…	Myocarditis Cases Reported After mRNA-Based COVID-19 Vaccination in the US From December 2020 to August 2021	Jama-Journal of the American Medical Association		0098-7484	10.1001/jama.2021.24110		IMPORTANCE Vaccination against COVID-19 provides clear public health benefits, but vaccination also carries potential risks. The risks and outcomes of myocarditis after COVID-19 vaccination are unclear. OBJECTIVE To describe reports of myocarditis and the reporting rates after mRNA-based COVID-19 vaccination in the US. DESIGN, SETTING, AND PARTICIPANTS Descriptive study of reports of myocarditis …	2022/1/25	2022/9/20 11:15	2022/9/20 11:15		331-340		4	327		JAMA-J. Am. Med. Assoc.								English							Place: Chicago Publisher: Amer Medical Assoc WOS:000753055700010				united-states; therapy; diagnosis; scientific statement; management; task-force; trends; cardiac magnetic-resonance; heart-association
EB58LRRE	journalArticle	2022	Monreal-Escalante, Elizabeth; Ramos-Vega, Abel; Angulo, Carlos; Banuelos-Hernandez, Bernardo	Plant-Based Vaccines: Antigen Design, Diversity, and Strategies for High Level Production	Vaccines			10.3390/vaccines10010100		Vaccines for human use have conventionally been developed by the production of (1) microbial pathogens in eggs or mammalian cells that are then inactivated, or (2) by the production of pathogen proteins in mammalian and insect cells that are purified for vaccine formulation, as well as, more recently, (3) by using RNA or DNA fragments from pathogens. Another approach for recombinant antigen produ…	Jan-22	2022/9/20 11:15	2022/9/20 11:15		100		1	10		Vaccines								English							Place: Basel Publisher: Mdpi WOS:000756978700001				virus; immunogenicity; influenza; viral vectors; covid 19; antigens; biopharming; edible vaccine; hepatitis-b; inducible gene-expression; influenza vaccine; monoclonal-antibodies; oral delivery; selectable marker; surface-antigen; virus-like particles
UYKDAPE5	journalArticle	2022	Pan, Jinhua; Kezhong, A.; Liu, Zhixi; Zhang, Peng; Xu, Zhiyin; Guo, Xiaoqin; Liu, Guangtao; Xu, Ao; Wang, Jing; Wang, Xinyu; Wang, Weibing	Factors That Impact Acceptance of COVID-19 Vaccination in Different Community-Dwelling Populations in China	Vaccines			10.3390/vaccines10010091		(1) Background: It is important to improve vaccination strategies and immunization programs to achieve herd immunity to infectious diseases. (2) Methods: To assess the acceptance of COVID-19 vaccination, we conducted face-to-face surveys and online surveys in Shanghai, Zhejiang, and Qinghai provinces. A fixed-effect model and a random effects model were used to analyze factors associated with the…	Jan-22	2022/9/20 11:15	2022/9/20 11:15		91		1	10		Vaccines								English							Place: Basel Publisher: Mdpi WOS:000747680400001				covid-19; knowledge; influencing factors; attitude; multi-level logistic regression; vaccine acceptance rate
5YS2IFDM	journalArticle	2022	Bono, Suzanna Awang; Siau, Ching Sin; Chen, Won Sun; Low, Wah Yun; Faria de Moura Villela, Edlaine; Pengpid, Supa; Hasan, M. Tasdik; Sessou, Philippe; Ditekemena, John D.; Amodan, Bob Omoda; Hosseinipour, Mina C.; Dolo, Housseini; Siewe Fodjo, Joseph Nelson; Colebunders, Robert	Adults' Acceptance of COVID-19 Vaccine for Children in Selected Lower- and Middle-Income Countries	Vaccines			10.3390/vaccines10010011		Since emergency approval of COVID-19 vaccines for children aged between 12 and 15 years old was recently obtained in the United States and Europe, we aimed to assess the willingness to vaccinate children with a COVID-19 vaccine in lower- and middle-income countries (LMICs). Therefore, we launched an online cross-sectional survey in several LMICs. Questions relating to socio-demographic informatio…	Jan-22	2022/9/20 11:15	2022/9/20 11:15		11		1	10		Vaccines								English							Place: Basel Publisher: Mdpi WOS:000748214800001				willingness; children; Malaysia; COVID-19 vaccination; immunization; influenza; Brazil; parents; Thailand; Africa; Bangladesh; caretaker; lower- and middle-income countries
EBHTNZZ6	journalArticle	2022	Klausberger, Miriam; Kienzl, Nikolaus F.; Stadlmayr, Gerhard; Grunwald-Gruber, Clemens; Laurent, Elisabeth; Stadlbauer, Katharina; Stracke, Florian; Vierlinger, Klemens; Hofner, Manuela; Manhart, Gabriele; Gerner, Wilhelm; Grebien, Florian; Weinhausel, Andreas; Mach, Lukas; Wozniak-Knopp, Gordana	Designed SARS-CoV-2 receptor binding domain variants form stable monomers	Biotechnology Journal		1860-6768	10.1002/biot.202100422		The receptor binding domain (RBD) of the SARS-CoV-2 spike (S)-protein is a prime target of virus-neutralizing antibodies present in convalescent sera of COVID-19 patients and thus is considered a key antigen for immunosurveillance studies and vaccine development. Although recombinant expression of RBD has been achieved in several eukaryotic systems, mammalian cells have proven particularly useful…	May-22	2022/9/20 11:15	2022/9/20 11:15		e2100422		5	17		Biotechnol. J.								English							Place: Weinheim Publisher: Wiley-V C H Verlag Gmbh WOS:000750285100001				covid-19; spike; ace2; antibody assay validation; antigen stability; receptor binding domain; recombinant expression; vaccine candidate
UW5JU8JJ	journalArticle	2022	Aliberti, Silvana Mirella; Schiavo, Luigi; Boccia, Giovanni; Santoro, Emanuela; Franci, Gianluigi; Ruggiero, Alessandro; De Caro, Francesco; Capunzo, Mario	Gender and AB0 Blood Type Differences in a Unicentric Group of University Professors in Southern Italy Who Received the Vaxzevria COVID-19 Vaccine: A Cross-Sectional Survey of Vaccine Side Effects, Attitudes, and Hesitation	Vaccines			10.3390/vaccines10030373		Vaccination has been a key protective behavior for COVID-19. This study investigated the clinical status of university professors administered the Vaxzevria COVID-19 vaccine, to monitor for any adverse reaction, and to understand attitude and hesitancy to vaccination. Data were collected through an online survey. The study received approval from the relevant ethics committee "Comitato Etico Campa…	Mar-22	2022/9/20 11:15	2022/9/20 11:15		373		3	10		Vaccines								English							Place: Basel Publisher: Mdpi WOS:000774436300001				attitudes; hesitancy; AB0 blood type; gender difference; side effects; university professors; Vaxzevria vaccine
D62CRQFW	journalArticle	2022	He, Xuan; Aid, Malika; Chandrashekar, Abishek; Yu, Jingyou; McMahan, Katherine; Wegmann, Frank; Jacob-Dolan, Catherine; Maron, Jenny S.; Atyeo, Caroline; Wan, Huahua; Sellers, Daniel; Liu, Jinyan; Lifton, Michelle; Gardner, Sarah; Bondzie, Esther A.; Barrett, Julia; Ahmad, Kunza; Anioke, Tochi; Yalley-Ogunro, Jake; Muench, Jeanne; Goode, Adrienne; Andersen, Hanne; Lewis, Mark G.; Alter, Galit; Sc…	A homologous or variant booster vaccine after Ad26.COV2.S immunization enhances SARS-CoV-2-specific immune responses in rhesus macaques	Science Translational Medicine		1946-6234	10.1126/scitranslmed.abm4996		Ad26.COV2.S has demonstrated durability and clinical efficacy against symptomatic COVID-19 in humans. In this study, we report the correlates of durability of humoral and cellular immune responses in 20 rhesus macaques immunized with single-shot Ad26.COV2.S and the immunogenicity of a booster shot at 8 to 10 months after the initial immunization. Ad26.COV2.S elicited durable binding and neutraliz…	2022/3/30	2022/9/20 11:15	2022/9/20 11:15		eabm4996		638	14		Sci. Transl. Med.								English							Place: Washington Publisher: Amer Assoc Advancement Science WOS:000776486900006				cells; immunogenicity; hiv-1 env vaccine
9H6SQ7NW	journalArticle	2022	Kalucka, Sylwia; Kusidel, Ewa; Glowacka, Agnieszka; Oczos, Paulina; Grzegorczyk-Karolak, Izabela	Pre-Vaccination Stress, Post-Vaccination Adverse Reactions, and Attitudes towards Vaccination after Receiving the COVID-19 Vaccine among Health Care Workers	Vaccines			10.3390/vaccines10030401		The vaccines against COVID-19 are the best treatment for limiting the spread of the epidemic, and from an individual point of view, for avoiding getting sick. A cross-sectional retrospective survey was conducted from 15 May to 15 July 2021 among healthcare workers, including doctors, nurses, midwives, and students at the Medical University of Lodz (nursing, midwifery and medical students) in Pola…	Mar-22	2022/9/20 11:15	2022/9/20 11:15		401		3	10		Vaccines								English							Place: Basel Publisher: Mdpi WOS:000774429100001				COVID-19 vaccine; intention; motivation; attitude; stress; BioNTech/Pfizer vaccine; doctor; healthcare workers; medical students; midwife; nurse; nursing and midwifery students; Oxford/AstraZeneca vaccine; vaccination adverse reaction
YTUURR5S	journalArticle		Peters, Laura L.; Raymer, David S.; Pal, Jay D.; Ambardekar, Amrut	Association of COVID-19 Vaccination With Risk of COVID-19 Infection, Hospitalization, and Death in Heart Transplant Recipients	Jama Cardiology		2380-6583	10.1001/jamacardio.2022.0670		IMPORTANCE Orthotopic heart transplant (OHT) recipients are at increased risk for morbidity and mortality after SARS-CoV-2 infection. Although antibody response to COVID-19 vaccination is lower in solid organ transplant recipients, there has been no study assessing the safety and effectiveness of COVID-19 vaccination in OHT recipients. OBJECTIVE To assess the safety and effectiveness of COVID-19 …		2022/9/20 11:15	2022/9/20 11:15							JAMA Cardiol.								English							Place: Chicago Publisher: Amer Medical Assoc WOS:000788691000003
CSBBHNCB	journalArticle	2022	de Vries, Hein; Verputten, Wouter; Preissner, Christian; Kok, Gerjo	COVID-19 Vaccine Hesitancy: The Role of Information Sources and Beliefs in Dutch Adults	International Journal of Environmental Research and Public Health			10.3390/ijerph19063205		COVID-19 vaccine hesitancy may be regarded as a new pandemic hindering the elimination of or coping with COVID-19. This study assessed reasons for COVID-19 vaccine hesitancy using the I-Change Model (ICM) by considering the role of informational and psychosocial factors. A cross-sectional online survey using a convenience sample was conducted among Dutch adults (n = 240). The questionnaire assess…	Mar-22	2022/9/20 11:15	2022/9/20 11:15		3205		6	19		Int. J. Environ. Res. Public Health								English							Place: Basel Publisher: Mdpi WOS:000775254000001				covid-19; cancer; attitudes; knowledge; acceptance; vaccine hesitancy; model; fear; I-Change Model; information seeking behaviour; self-efficacy
5EQQF7LF	journalArticle	2022	Sciaccaluga, Carlotta; D'Ascenzi, Flavio; Cameli, Matteo; Gallotta, Maddalena; Menci, Daniele; Antonelli, Giovanni; Banchi, Benedetta; Mochi, Veronica; Valente, Serafina; Focardi, Marta	Case Report: Two Case Reports of Acute Myopericarditis After mRNA COVID-19 Vaccine	Frontiers in Cardiovascular Medicine		2297-055X	10.3389/fcvm.2022.827237		BackgroundCases of myocarditis and myopericarditis after mRNA COVID-19 vaccines have been reported, especially after the second dose and in young males. Their course is generally benign, with symptoms onset after 24-72 h from the dose. Case SummaryWe report two cases of myopericarditis after the second dose of the mRNA-1273 COVID-19 vaccine in two young males. Both the patients were administered …	2022/3/7	2022/9/20 11:15	2022/9/20 11:15		827237			9		Front. Cardiovasc. Med.								English							Place: Lausanne Publisher: Frontiers Media Sa WOS:000791957600001				covid-19; myocarditis; mRNA vaccine; case report; myopericarditis
HKPP2IWJ	journalArticle	2022	Alshukairi, Abeer N.; Doar, Hazem; Al-Sagheir, Afaf; Bahasan, Mona A.; Sultan, Anas A.; Al Hroub, Mohammad K.; Itani, Dina; Khalid, Imran; Saeedi, Mohammed F.; Bakhamis, Sarah; Layqah, Laila; Almutairi, Afnan A.; Saifullah, Mona; Hefni, Lama; Al-Omari, Awad; Alraddadi, Basem M.; Baharoon, Salim A.	Outcome of COVID19 in Patients With Osteogenesis Imperfecta: A Retrospective Multicenter Study in Saudi Arabia	Frontiers in Endocrinology		1664-2392	10.3389/fendo.2021.800376		BackgroundAlthough genetic diseases are rare, children with such conditions who get infected with COVID-19 tend to have a severe illness requiring hospitalization. Osteogenesis imperfecta (OI) is a rare genetic disorder of collagen resulting in fractures and skeletal deformities. Kyphoscoliosis, restrictive lung disease, and pneumonia worsen the prognosis of patients with OI. The use of bisphosph…	2022/1/13	2022/9/20 11:15	2022/9/20 11:15		800376			12		Front. Endocrinol.								English							Place: Lausanne Publisher: Frontiers Media Sa WOS:000748040800001				sars-cov-2 infection; covid; disease; children; clinical characteristics; outcome; 19; bisphosphonate; fracture; osteogenesis imperfecta
TIP5AYR6	journalArticle	2022	Zhang, Menghan; Qi, Xue; Chen, Ze; Liu, Jun	Social Bots' Involvement in the COVID-19 Vaccine Discussions on Twitter	International Journal of Environmental Research and Public Health			10.3390/ijerph19031651		During the COVID-19 pandemic, social media served as an important channel for the public to obtain health information and disseminate opinions when offline communication was severely hindered. Yet the emergence of social bots influencing social media conversations about public health threats will require researchers and practitioners to develop new communication strategies considering their influ…	Feb-22	2022/9/20 11:15	2022/9/20 11:15		1651		3	19		Int. J. Environ. Res. Public Health								English							Place: Basel Publisher: Mdpi WOS:000754828200001				COVID-19 vaccine; challenges; communication; media; twitter; social bots; social media analytics; web 2.0
5IWX3M5J	journalArticle		DeDonno, M. A.; Longo, J.; Levy, X.; Morris, J. D.	Perceived Susceptibility and Severity of COVID-19 on Prevention Practices, Early in the Pandemic in the State of Florida	Journal of Community Health		0094-5145	10.1007/s10900-022-01090-8		Early in the pandemic and prior to the development of the COVID-19 vaccine, prevention measures were promoted to help inhibit the spread of the virus. To optimize adherence to prevention practices, it's important to understand factors that may influence adherence. A study was conducted in the month of April, 2020, to explore the influence of perceptions of COVID-19 on prevention practices. The sa…		2022/9/20 11:15	2022/9/20 11:15							J. Community Health								English							Place: New York Publisher: Springer WOS:000786815500001				covid-19; Pandemic; framework; health belief model; Health belief model; Prevention practices
LIH9WP99	journalArticle	2022	Lee, Hye Kyung; Knabl, Ludwig; Knabl Sr, Ludwig Sr; Wieser, Manuel; Mur, Anna; Zabernigg, August; Schumacher, Jana; Kapferer, Sebastian; Kaiser, Norbert; Furth, Priscilla A.; Hennighausen, Lothar	Immune transcriptome analysis of COVID-19 patients infected with SARS-CoV-2 variants carrying the E484K escape mutation identifies a distinct gene module	Scientific Reports		2045-2322	10.1038/s41598-022-06752-0		Fast-spreading variants of severe acute respiratory syndrome coronavirus 2 (SARS-CoV-2) energize the COVID-19 pandemic. While viral infections elicit a conserved immune response, it is not known whether SARS-CoV-2 variants, which display enhanced binding to the ACE2 receptor and reduced neutralizing activity by vaccine-elicited antibodies, prompt specific genomic immune responses. To test this, w…	2022/2/18	2022/9/20 11:15	2022/9/20 11:15		2784		1	12		Sci Rep								English							Place: Berlin Publisher: Nature Portfolio WOS:000757901500050
FT44JT74	journalArticle	2022	Pecetta, Simone; Tortorice, Daniel; Scorza, Francesco Berlanda; Pizza, Mariagrazia; Dougan, Gordon; Hatchett, Richard; Black, Steve; Bloom, David E.; Rappuoli, Rino	The trillion dollar vaccine gap	Science Translational Medicine		1946-6234	10.1126/scitranslmed.abn4342		New technologies and unprecedented public investment have transformed vaccine development and allowed fast delivery of safe and efficacious COVID-19 vaccines, mitigating the impact of the pandemic on health and the economy. A quantum change in public investment for vaccine development and widespread vaccine distribution are necessary to achieve global pandemic preparedness.	2022/3/30	2022/9/20 11:15	2022/9/20 11:15		eabn4342		638	14		Sci. Transl. Med.								English							Place: Washington Publisher: Amer Assoc Advancement Science WOS:000776486900001				rna; spike
3JFFIGAP	journalArticle	2022	Chibwana, Marah G.; Moyo-Gwete, Thandeka; Kwatra, Gaurav; Mandolo, Jonathan; Hermanaus, Tandile; Motlou, Thopisang; Mzindle, Nonkululeko; Ayres, Frances; Chaponda, Mphatso; Tembo, Godwin; Mwenechanya, Percy; Mitole, Ndaona; Jassi, Chisomo; Kamng'ona, Raphael; Afran, Louise; Mzinza, David; Mwandumba, Henry C.; Gordon, Stephen B.; Jere, Khuzwayo; Madhi, Shabir; Moore, Penny L.; Heyderman, Robert S.…	AstraZeneca COVID-19 vaccine induces robust broadly cross-reactive antibody responses in Malawian adults previously infected with SARS-CoV-2	Bmc Medicine		1741-7015	10.1186/s12916-022-02342-z		Background Binding and neutralising anti-Spike antibodies play a key role in immune defence against SARS-CoV-2 infection. Since it is known that antibodies wane with time and new immune-evasive variants are emerging, we aimed to assess the dynamics of anti-Spike antibodies in an African adult population with prior SARS-CoV-2 infection and to determine the effect of subsequent COVID-19 vaccination…	2022/3/28	2022/9/20 11:15	2022/9/20 11:15		128		1	20		BMC Med.								English							Place: London Publisher: Bmc WOS:000773990000001				SARS-CoV-2; Antibodies; rbd; AstraZeneca COVID-19 vaccine; Spike; voc
UJ23QCIY	journalArticle		Ramirez, Angie L.; Luna, Nicolas; Patino, Luz H.; Castaneda, Sergio; Munoz, Marina; Ballesteros, Nathalia; Perez, Julie; Correa-Cardenas, Camilo A.; Clara Duque, Maria; Mendez, Claudia; Oliveros, Carolina; Paniz-Mondolfi, Alberto E.; David Ramirez, Juan	Impact of SARS-CoV-2 Mu variant on vaccine effectiveness: A comparative genomics study at the peak of the third wave in Bogota, Colombia	Journal of Medical Virology		0146-6615	10.1002/jmv.27808		We assessed the circulation of severe acute respiratory syndrome coronavirus-2 variants amongst vaccinated military personnel in Bogota, Colombia to evaluate the mutations of certain variants and their potential for breakthrough infection in vaccinated subjects. We observed that in vaccinated individuals the most frequent infecting lineage was Mu (B.1.621 and B.1.621.1). The above is possibly ass…		2022/9/20 11:15	2022/9/20 11:15							J. Med. Virol.								English							Place: Hoboken Publisher: Wiley WOS:000789884400001				SARS-CoV-2; rt-pcr; variants; sequencing
BEEVW69J	journalArticle	2022	Sadoff, J.; Gray, G.; Vandebosch, A.; Cardenas, V.; Shukarev, G.; Grinsztejn, B.; Goepfert, P. A.; Truyers, C.; Van Dromme, I.; Spiessens, B.; Vingerhoets, J.; Custers, J.; Scheper, G.; Robb, M. L.; Treanor, J.; Ryser, M. F.; Barouch, D. H.; Swan, E.; Marovic, M. A.; Neuzil, K. M.; Corey, L.; Stoddar, J.; Hard, K.; Ruiz-Guinazu, J.; Le Gars, M.; Schuitemaker, H.; Van Hoof, J.; Stru, F.; Douoguih,…	Final Analysis of Efficacy and Safety of Single-Dose Ad26.COV2.S	New England Journal of Medicine		0028-4793	10.1056/NEJMoa2117608		BACKGROUND The Ad26.COV2.S vaccine was highly effective against severe-critical coronavirus disease 2019 (Covid-19), hospitalization, and death in the primary phase 3 efficacy analysis. METHODS We conducted the final analysis in the double-blind phase of our multinational, randomized, placebo-controlled trial, in which adults were assigned in a 1:1 ratio to receive single-dose Ad26.COV2.S (5x10(1…	2022/3/3	2022/9/20 11:15	2022/9/20 11:15		847-860		9	386		N. Engl. J. Med.								English							Place: Waltham Publisher: Massachusetts Medical Soc WOS:000753119300001				covid-19 vaccine; states
AA5CK6WG	journalArticle	2022	Alotaibi, Badriyah; El-Masry, Thanaa A.; Seadawy, Mohamed G.; El-Harty, Bassem E.; Saleh, Asmaa; Gad, Ahmed F.; El-Hosseny, Mostafa F.; Mahran, Yasmen F.; El-Bouseary, Maisra M.	Identification, propagation and molecular characterization of SARS-CoV-2 delta variant isolated from Egyptian COVID-19 patients	Infection Genetics and Evolution		1567-1348	10.1016/j.meegid.2022.105278		The recently emerging coronavirus, severe acute respiratory syndrome coronavirus 2, (SARS-CoV-2) is the causative agent of the Coronavirus disease 2019 (COVID-19) pandemic. Since its discovery in the city of Wahan, China, SARS-CoV-2 has spread rapidly to invade all countries. In addition to its rapid transmission rate, it is characterized by high genetic mutation rates. The aim of this study is t…	Jun-22	2022/9/20 11:15	2022/9/20 11:15		105278			100		Infect. Genet. Evol.								English							Place: Amsterdam Publisher: Elsevier WOS:000798384000001				SARS-CoV-2; coronavirus; Delta variant; Isolation; Propagation; RT-qPCR; Variant of concern
I4W59NMX	journalArticle	2022	Peckeu-Abboud, L.; van Kleef, E.; Smekens, T.; Latour, K.; Dequeker, S.; Panis, L. Int; Laga, M.	Factors influencing SARS-CoV-2 infection rate in Belgian nursing home residents during the first wave of COVID-19 pandemic	Epidemiology and Infection		0950-2688	10.1017/S0950268822000334		In April 2020, Belgium experienced high numbers of fatal COVID-19 cases among nursing home (NH) residents. In response, a mass testing campaign was organised testing all NH residents and staff. We analysed the data of Flemish NHs to identify institutional factors associated with increased SARS-CoV-2 infection rates among NH residents. Cross-sectional study was conducted between 8 April and 15 May…	2022/2/22	2022/9/20 11:15	2022/9/20 11:15		e72			150		Epidemiol. Infect.								English							Place: New York Publisher: Cambridge Univ Press WOS:000780391500001				outbreaks; Belgian nursing homes; compulsory vaccination; risk factors analysis; SARS-CoV infection rate
6K4PIHWT	journalArticle	2022	Walewska, Renata; Parry-Jones, Nilima; Eyre, Toby A.; Follows, George; Martinez-Calle, Nicolas; McCarthy, Helen; Parry, Helen; Patten, Piers E. M.; Riches, John C.; Hillmen, Peter; Schuh, Anna H.	Guideline for the treatment of chronic lymphocytic leukaemia	British Journal of Haematology		0007-1048	10.1111/bjh.18075			Jun-22	2022/9/20 11:15	2022/9/20 11:15		544-557		5	197		Br. J. Haematol.								English							Place: Hoboken Publisher: Wiley WOS:000771076500001				vaccination; multicenter; rituximab; outcomes; acalabrutinib; chemoimmunotherapy; chlorambucil; cll; Covid19; ibrutinib; idelalisib; open-label; treatment; venetoclax
DZF4785D	journalArticle	2022	Faye, Sylvain Landry B.; Krumkamp, Ralf; Doumbia, Seydou; Tounkara, Moctar; Strauss, Ricardo; Ouedraogo, Henri Gautier; Sagna, Tani; Barry, Alpha Mahmoud; Mbawah, Abdul Karim; Doumbia, Cheick Oumar; Diouf, Souleymane; Cisse, Kadari; Harding, Mohamed; Donven, Paule; May, Juergen; Puradiredja, Dewi Ismajani; Fusco, Daniela	Factors influencing hesitancy towards adult and child COVID-19 vaccines in rural and urban West Africa: a cross-sectional study	Bmj Open		2044-6055	10.1136/bmjopen-2021-059138		Objectives This study aims: (1) to identify and describe similarities and differences in both adult and child COVID-19 vaccine hesitancy, and (2) to examine sociodemographic, perception-related and behavioural factors influencing vaccine hesitancy across five West African countries. Design Cross-sectional survey carried out between 5 May and 5 June 2021. Participants and setting 4198 individuals …	Apr-22	2022/9/20 11:15	2022/9/20 11:15		e059138		4	12		BMJ Open								English							Place: London Publisher: Bmj Publishing Group WOS:000783232500037				covid-19; public health; epidemiology; preventive medicine
YPQAQGZD	journalArticle		Bailard, Catie Snow	Do Local Newspapers Mitigate the Effects of the Polarized National Rhetoric on COVID-19?	International Journal of Press-Politics		1940-1612	10.1177/19401612211072774		This analysis tests two distinct predictions regarding local newspapers' coverage of the COVID-19 pandemic in the United States. A public service view of local newspapers predicts that a robust local newspaper sector would mitigate the politicized national partisan rhetoric surrounding COVID-19; reducing the disparity in social-distancing behaviors between predominantly Republican and predominant…		2022/9/20 11:15	2022/9/20 11:15		1.94016E+16					Int. J. Press-Polit.								English							Place: Thousand Oaks Publisher: Sage Publications Inc WOS:000740773700001				covid-19; partisanship; polarization; coverage; news; local news deserts; Local newspapers; media bias; partisan bias; social-distancing
3DRLGNNQ	journalArticle		Zhong, Yaping; Zhao, Huan; Wang, Xiaolei; Ji, Ji	Using the theory of planned behaviour to explain junior nurses' and final-year student nurses' intention to care for COVID-19 patients in China: A multisite cross-sectional study	Journal of Nursing Management		0966-0429	10.1111/jonm.13639		Aim To explore junior nurses' and final-year student nurses' intention to care for COVID-19 patients amidst the Delta COVID-19 variant outbreak in China using the theory of planned behaviour (TPB) as a framework. Background The COVID-19 pandemic has intensified global nursing shortage. Junior nurses and final-year student nurses represent the backbone of the future frontline nursing workforce. Th…		2022/9/20 11:15	2022/9/20 11:15							J. Nurs. Manag.								English							Place: Hoboken Publisher: Wiley WOS:000788498300001				covid-19; intention; China; nurses; patient care
54AZPBMH	journalArticle	2022	Li, Ting; Qiu, Xichenhui; Gong, Xue; Zhan, Rou; Zheng, Xujuan	The cross-sectional survey on COVID-19 vaccine hesitancy and it predictors among Chinese parents of 3-17 years aged children in Shenzhen City	Annals of Agricultural and Environmental Medicine		1232-1966	10.26444/aaem/146263		Introduction and Objective. Vaccinations programs on 3-17 years aged children in China have been launched in some cities since July 2021; and comparative evaluations are important to push the programs forward. Therefore, this study is conducted to explore the COVID-19 vaccine hesitancy and it predictors among Chinese parents of 3-17 years aged children; and their willingness to vaccinate their ch…	2022	2022/9/20 11:15	2022/9/20 11:15		120-125		1	29		Ann. Agr. Env. Med.								English							Place: Lublin Publisher: Inst Rural Health Lublin, Poland WOS:000774556400017				covid-19; united-states; vaccine; children; vaccine hesitancy; acceptability; Chinese parents; health-care workers; public health
L4BSZZPT	journalArticle	2022	Cheng, Samuel M. S.; Mok, Chris Ka Pun; Leung, Yonna W. Y.; Ng, Susanna S.; Chan, Karl C. K.; Ko, Fanny W.; Chen, Chunke; Yiu, Karen; Lam, Bosco H. S.; Lau, Eric H. Y.; Chan, Ken K. P.; Luk, Leo L. H.; Li, John K. C.; Tsang, Leo C. H.; Poon, Leo L. M.; Hui, David S. C.; Peiris, Malik	Neutralizing antibodies against the SARS-CoV-2 Omicron variant BA.1 following homologous and heterologous CoronaVac or BNT162b2 vaccination	Nature Medicine		1078-8956	10.1038/s41591-022-01704-7		Serum neutralizing antibody titers against the SARS-CoV-2 Omicron variant markedly increase after a third dose of BNT162b2 vaccine in individuals who previously received either two doses of the BNT162b2 vaccine or two doses of the CoronaVac vaccine. The Omicron variant is rapidly becoming the dominant SARS-CoV-2 virus circulating globally. It is important to define reductions in virus neutralizin…	Mar-22	2022/9/20 11:15	2022/9/20 11:15		486-+		3	28		Nat. Med.								English							Place: Berlin Publisher: Nature Portfolio WOS:000760098500001
WJFTFMUR	journalArticle		Gao, Liyan; Su, Siman; Du, Niuniu; Han, Yu; Wei, Jiayi; Cao, Meijuan; Miao, Qunfang; Wang, Xiaolei	Medical and non-medical students' knowledge, attitude and willingness towards the COVID-19 vaccine in China: a cross-sectional online survey	Human Vaccines & Immunotherapeutics		2164-5515	10.1080/21645515.2022.2073757		In the context of the novel Coronavirus outbreak and China's official policy of free vaccination against COVID-19 for all, medical students' attitudes and knowledge toward vaccines can influence public acceptance to some extent, however, the large base of non-medical students cannot be ignored. We aimed to investigate the knowledge, attitude, and willingness toward the COVID-19 vaccine among medi…		2022/9/20 11:15	2022/9/20 11:15							Human Vaccines Immunother.								English							Place: Philadelphia Publisher: Taylor & Francis Inc WOS:000801848200001				knowledge; willingness; COVID-19 vaccination; attitude; health self-management; medical and non-medical student
7EP5AEBL	journalArticle	2022	Ennaceur, Soukaina; Al-Mohaithef, Mohammed	Parents' Willingness to Vaccinate Children against COVID-19 in Saudi Arabia: A Cross-Sectional Study	Vaccines			10.3390/vaccines10020156		Objectives: The present study aimed to investigate parents' willingness to vaccinate their children under the age of 18 with a COVID-19 vaccine. Methods: This cross-sectional study was conducted in Saudi Arabia from January 2021 to March 2021. The univariate analysis using Mann-Whitney U-test, t-test, and chi-squared/Fisher's exact test was performed to identify sociodemographic factors associate…	Feb-22	2022/9/20 11:15	2022/9/20 11:15		156		2	10		Vaccines								English							Place: Basel Publisher: Mdpi WOS:000762020500001				covid-19; pandemic; vaccination; children; acceptability; parents' willingness; Saudi Arabia
TQRNYRGQ	journalArticle	2022	Madhavan, Ramya; Paul, Jackwin Sam; Babji, Sudhir; Kumar, Dilesh; Prabhu, Savit B.; Pulleri, Harsha Kandi; Annadorai, Ravikiran; Gowda, Sampreeth Ravi; John, Jacob; Kang, Gagandeep	Risk of COVID-19 re-infection and its predictors (CORES): protocol for a community-based longitudinal cohort study in Vellore, India	Bmj Open		2044-6055	10.1136/bmjopen-2021-059869		Introduction The incidence of SARS-CoV-2 re-infection has not been widely evaluated in low-income and middle-income countries. Understanding immune responses elicited by SARS-CoV-2 natural infection and factors that lead to re-infection in a community setting is important for public health policy. We aim to investigate the risk of primary infection and re-infection among those without and with ev…	May-22	2022/9/20 11:15	2022/9/20 11:15		e059869		5	12		BMJ Open								English							Place: London Publisher: Bmj Publishing Group WOS:000800212000017				covid-19; coronavirus; public health; immunology
SKHNFWUS	journalArticle	2022	Velikonja, Nevenka Kregar; Velikonja, Vislava Globevnik; Verdenik, Ivan; Jurisic, Ivan; Stanisavljevic, Sanja; Dobrowolska, Beata; Erjavec, Karmen	Vaccination intention among healthcare workers during the first wave of the coronavirus disease 2019 pandemic in relation to knowledge: a cross-sectional study in Croatia, Slovenia, Serbia, and Poland	Croatian Medical Journal		0353-9504	10.3325/cmj.2022.63.79		Aim To analyze SARS-CoV-2 vaccination intention and acceptance in relation to the knowledge about coronavirus disease 2019 (COVID-19) among healthcare workers (HCWs) in Croatia, Slovenia, Serbia, and Poland. Methods In spring 2020, an online survey was distributed among HCWs by using snowball sampling. The questionnaire was fully completed by 623 respondents: 304 from Croatia, 86 from Slovenia, 9…	Feb-22	2022/9/20 11:15	2022/9/20 11:15		79-88		1	63		Croat. Med. J.								English							Place: Zagreb Publisher: Medicinska Naklada WOS:000766776700010				hesitancy; influenza vaccination; acceptance; covid-19 vaccine; people; functional foods
LIGQIT8L	journalArticle	2022	Bagic, Dragan; Suljok, Adrijana; Ancic, Branko	Determinants and reasons for coronavirus disease 2019 vaccine hesitancy in Croatia	Croatian Medical Journal		0353-9504	10.3325/cmj.2022.63.89		Aim To assess the determinants and reasons for coronavirus disease 2019 (COVID-19) vaccine hesitancy in Croatia. Methods The data were collected through a sociological survey by using a mixed-mode approach (computer-assisted web interviewing and computer-assisted telephone interview) on a national sample of 765 adults aged 18 or above. Bivariate (chi(2) test) and multivariate (binary logistic reg…	Feb-22	2022/9/20 11:15	2022/9/20 11:15		89-97		1	63		Croat. Med. J.								English							Place: Zagreb Publisher: Medicinska Naklada WOS:000766776700011				need
F6LS2X6F	journalArticle	2022	Martinez Gonzalez, Andrea; Reynolds-Tylus, Tobias; Galarreta-Aima, Diana; Aleman, Carlos G.	COVID-19 Beliefs Among Hispanic and Latinx Virginians: An Application of the Health Belief Model	Frontiers in Communication			10.3389/fcomm.2022.876656		IntroductionCOVID-19 disproportionally affects U.S. Hispanic and Latinx individuals. Guided by the Health Belief Model, we examined COVID-19 beliefs among Hispanic and Latinx adults in Virginia. MethodRespondents (n = 414) were Hispanic and/or Latinx adults in Virginia recruited via Qualtrics panel between May and September 2021. Approximately two-thirds completed the survey in English (63.0%), a…	2022/4/29	2022/9/20 11:15	2022/9/20 11:15		876656			7		Front. Commun.								English							Place: Lausanne Publisher: Frontiers Media Sa WOS:000795195300001				covid-19; vaccination; self-efficacy; Health Belief Model (HBM); Hispanic (demographic); Latinx
QM4FPKWG	journalArticle	2022	Pilkington, Victoria; Keestra, Sarai Mirjam; Hill, Andrew	Global COVID-19 Vaccine Inequity: Failures in the First Year of Distribution and Potential Solutions for the Future	Frontiers in Public Health			10.3389/fpubh.2022.821117		Within the first year of distribution of vaccines against COVID-19, high-income countries (HICs) have achieved vaccination rates of 75-80%, whilst low-income countries (LICs) vaccinated <10%. This disparity in access has been one of the greatest failures of international cooperation during the SARS-CoV-2 pandemic. Global COVID-19 vaccine inequity affects us all, with ongoing risk of new variants …	2022/3/7	2022/9/20 11:15	2022/9/20 11:15		821117			10		Front. Public Health								English							Place: Lausanne Publisher: Frontiers Media Sa WOS:000772888600001				covid-19; vaccines; inequality; manufacturing-R&D interface; pricing
RJ3ZBVJB	journalArticle	2022	Zhang, Yuan-Hang; Li, Hong-Xuan; Chen, Xi-Meng; Zhang, Liu-Hui; Zhao, You-Yi; Luo, Ai-Fang; Yang, Yu-Rong; Zheng, Lan-Lan; Chen, Hong-Ying	Genetic Characteristics and Pathogenicity of a Novel Porcine Epidemic Diarrhea Virus with a Naturally Occurring Truncated ORF3 Gene	Viruses-Basel			10.3390/v14030487		Porcine epidemic diarrhea virus (PEDV) is the major pathogen that causes diarrhea and high mortality in newborn piglets, with devastating impact on the pig industry. To further understand the molecular epidemiology and genetic diversity of PEDV field strains, in this study the complete genomes of four PEDV variants (HN2021, CH-HNYY-2018, CH-SXWS-2018, and CH-HNKF-2016) obtained from immunized pig…	Mar-22	2022/9/20 11:15	2022/9/20 11:15		487		3	14		Viruses-Basel								English							Place: Basel Publisher: Mdpi WOS:000774333900001				united-states; identification; disease; protein; china; outbreak; immunogenicity; porcine epidemic diarrhea virus; coronaviruses; molecular characteristics; pathogenicity; strains; subtypes; truncated ORF3; virulence
[truncated: 5,116 more rows]
[truncated: 37 more columns]
