# Supplementary material for: A Bibliometric Visualization Analysis on Vaccine Development of Coronavirus Disease 2019 (COVID-19)
Source: Vaccines (Basel). 2023 Jan 29;11(2):295. doi: 10.3390/vaccines11020295 (PMC9959778; doi:10.3390/vaccines11020295)
Supplement: Supplementary file 1 [file vaccines-11-00295-s001.zip › Appendix S6 summary from web of science core collection database.xlsx]

## Sheet: Publication Years
Publication Years	Excluded duplicated records	Record Count
2019	87	87	0.474
2020	2400	2400	13.065
2021	10290	10290	56.015
2022	5508	5593	30.446

## Sheet: Web of Science Categories
Web of Science Categories	Record Count	% of 18,370
Immunology	3063	16.674
Public Environmental Occupational Health	2114	11.508
Medicine Research Experimental	2093	11.394
Medicine General Internal	1885	10.261
Infectious Diseases	1354	7.371
Multidisciplinary Sciences	1316	7.164
Microbiology	981	5.34
Virology	833	4.535
Biochemistry Molecular Biology	817	4.447
Pharmacology Pharmacy	737	4.012
Biotechnology Applied Microbiology	563	3.065
Cell Biology	519	2.825
Health Care Sciences Services	498	2.711
Environmental Sciences	482	2.624
Chemistry Multidisciplinary	364	1.981
Health Policy Services	353	1.922
Oncology	261	1.421
Clinical Neurology	252	1.372
Biology	250	1.361
Biophysics	249	1.355
Mathematical Computational Biology	248	1.35
Pediatrics	246	1.339
Hematology	234	1.274
Biochemical Research Methods	226	1.23
Materials Science Multidisciplinary	191	1.04
Neurosciences	179	0.974
Computer Science Information Systems	177	0.964
Parasitology	160	0.871
Economics	159	0.866
Computer Science Interdisciplinary Applications	153	0.833
Surgery	153	0.833
Chemistry Medicinal	151	0.822
Medical Informatics	149	0.811
Nanoscience Nanotechnology	145	0.789
Rheumatology	144	0.784
Tropical Medicine	142	0.773
Ethics	139	0.757
Social Sciences Biomedical	138	0.751
Cardiac Cardiovascular Systems	135	0.735
Genetics Heredity	131	0.713
Urology Nephrology	130	0.708
Transplantation	128	0.697
Obstetrics Gynecology	125	0.68
Endocrinology Metabolism	122	0.664
Law	122	0.664
Veterinary Sciences	122	0.664
Medical Ethics	121	0.659
Psychiatry	116	0.631
Psychology Multidisciplinary	114	0.621
Physics Multidisciplinary	113	0.615
Communication	112	0.61
Respiratory System	107	0.582
Chemistry Physical	104	0.566
Mathematics Interdisciplinary Applications	103	0.561
Engineering Biomedical	93	0.506
Engineering Electrical Electronic	93	0.506
Geriatrics Gerontology	92	0.501
Allergy	91	0.495
Radiology Nuclear Medicine Medical Imaging	91	0.495
Gastroenterology Hepatology	87	0.474
Nursing	87	0.474
Chemistry Analytical	86	0.468
Dermatology	86	0.468
Physics Applied	80	0.435
Primary Health Care	74	0.403
Social Sciences Interdisciplinary	74	0.403
Information Science Library Science	73	0.397
Management	71	0.386
Peripheral Vascular Disease	71	0.386
Social Issues	71	0.386
Telecommunications	66	0.359
Mathematics Applied	65	0.354
Mathematics	64	0.348
Computer Science Artificial Intelligence	63	0.343
Medical Laboratory Technology	63	0.343
Ophthalmology	62	0.338
Engineering Multidisciplinary	61	0.332
Green Sustainable Science Technology	60	0.327
Physics Mathematical	60	0.327
Political Science	56	0.305
Psychology Clinical	53	0.289
Environmental Studies	51	0.278
Nutrition Dietetics	51	0.278
Pathology	51	0.278
Toxicology	51	0.278
Business	49	0.267
Education Educational Research	49	0.267
Psychology Social	48	0.261
Dentistry Oral Surgery Medicine	46	0.25
Operations Research Management Science	44	0.24
Food Science Technology	43	0.234
Computer Science Theory Methods	42	0.229
Emergency Medicine	41	0.223
Education Scientific Disciplines	40	0.218
International Relations	40	0.218
Plant Sciences	40	0.218
Statistics Probability	40	0.218
Chemistry Applied	37	0.201
Gerontology	37	0.201
Instruments Instrumentation	36	0.196
Critical Care Medicine	35	0.191
Engineering Chemical	34	0.185
Otorhinolaryngology	33	0.18
Medicine Legal	32	0.174
Hospitality Leisure Sport Tourism	31	0.169
Integrative Complementary Medicine	31	0.169
Chemistry Organic	29	0.158
Materials Science Biomaterials	29	0.158
Mechanics	29	0.158
Sociology	29	0.158
Engineering Mechanical	27	0.147
History Philosophy Of Science	27	0.147
Engineering Environmental	26	0.142
Physics Condensed Matter	26	0.142
Religion	26	0.142
Reproductive Biology	26	0.142
Social Work	25	0.136
Area Studies	24	0.131
Agriculture Dairy Animal Science	23	0.125
Electrochemistry	22	0.12
Physics Atomic Molecular Chemical	22	0.12
Polymer Science	22	0.12
Public Administration	22	0.12
Cell Tissue Engineering	21	0.114
Psychology Experimental	21	0.114
Social Sciences Mathematical Methods	21	0.114
Anesthesiology	20	0.109
Rehabilitation	20	0.109
Business Finance	19	0.103
Energy Fuels	19	0.103
Engineering Industrial	19	0.103
Physiology	19	0.103
Sport Sciences	19	0.103
Zoology	19	0.103
Automation Control Systems	18	0.098
Transportation	18	0.098
Construction Building Technology	17	0.093
Evolutionary Biology	17	0.093
Geosciences Multidisciplinary	17	0.093
Crystallography	16	0.087
Humanities Multidisciplinary	16	0.087
Psychology Developmental	16	0.087
Development Studies	15	0.082
Meteorology Atmospheric Sciences	15	0.082
Water Resources	15	0.082
Orthopedics	14	0.076
Psychology	14	0.076
Ecology	13	0.071
Geography	13	0.071
Philosophy	13	0.071
Engineering Civil	12	0.065
Psychology Applied	12	0.065
Substance Abuse	12	0.065
Computer Science Software Engineering	11	0.06
Industrial Relations Labor	11	0.06
Computer Science Hardware Architecture	10	0.054
Education Special	10	0.054
Engineering Manufacturing	10	0.054
Physics Fluids Plasmas	10	0.054
Language Linguistics	9	0.049
Transportation Science Technology	9	0.049
Agriculture Multidisciplinary	8	0.044
Behavioral Sciences	8	0.044
Developmental Biology	8	0.044
Family Studies	8	0.044
Psychology Biological	8	0.044
Thermodynamics	8	0.044
Urban Studies	8	0.044
Anthropology	7	0.038
Cultural Studies	7	0.038
History	7	0.038
Acoustics	6	0.033
Computer Science Cybernetics	6	0.033
Regional Urban Planning	6	0.033
Remote Sensing	6	0.033
Women S Studies	6	0.033
Andrology	5	0.027
Biodiversity Conservation	5	0.027
History Of Social Sciences	5	0.027
Linguistics	5	0.027
Agronomy	4	0.022
Chemistry Inorganic Nuclear	4	0.022
Criminology Penology	4	0.022
Geography Physical	4	0.022
Materials Science Coatings Films	4	0.022
Optics	4	0.022
Robotics	4	0.022
Spectroscopy	4	0.022
Ethnic Studies	3	0.016
Film Radio Television	3	0.016
Metallurgy Metallurgical Engineering	3	0.016
Neuroimaging	3	0.016
Psychology Educational	3	0.016
Psychology Psychoanalysis	3	0.016
Anatomy Morphology	2	0.011
Audiology Speech Language Pathology	2	0.011
Demography	2	0.011
Microscopy	2	0.011
Mycology	2	0.011
Theater	2	0.011
Agricultural Economics Policy	1	0.005
Architecture	1	0.005
Art	1	0.005
Astronomy Astrophysics	1	0.005
Engineering Aerospace	1	0.005
Entomology	1	0.005
Ergonomics	1	0.005
Forestry	1	0.005
Imaging Science Photographic Technology	1	0.005
Literature British Isles	1	0.005
Logic	1	0.005
Marine Freshwater Biology	1	0.005
Materials Science Ceramics	1	0.005
Materials Science Characterization Testing	1	0.005
Materials Science Textiles	1	0.005
Mineralogy	1	0.005
Soil Science	1	0.005

## Sheet: Authors
Authors	Record Count	% of 18,370
Li Y	66	0.359
Zhang Y	64	0.348
Wang J	60	0.327
Liu Y	57	0.31
Kumar A	55	0.299
Li J	54	0.294
Wang L	52	0.283
Wang Q	50	0.272
Zhang L	50	0.272
Krammer F	49	0.267
Li L	48	0.261
Baric RS	45	0.245
Lee J	45	0.245
Barouch DH	44	0.24
Kumar S	44	0.24
Li H	44	0.24
Zhang J	43	0.234
Chen Y	42	0.229
Kim J	42	0.229
Liu J	41	0.223
Wang Y	41	0.223
Lambe T	40	0.218
Li X	40	0.218
Pollard AJ	40	0.218
Yang Y	40	0.218
Khan A	39	0.212
Singh S	39	0.212
Diamond MS	37	0.201
Huang WJ	37	0.201
Sharma S	37	0.201
Alter G	36	0.196
Lee S	36	0.196
Sheikh A	35	0.191
Andersen H	34	0.185
Sette A	34	0.185
Shi PY	34	0.185
Yuen KY	34	0.185
Graham BS	33	0.18
Lewis MG	33	0.18
Wang YC	33	0.18
Gupta S	32	0.174
Liu JY	32	0.174
Kim S	31	0.169
Wang C	31	0.169
Wang W	31	0.169
Ahmed S	30	0.163
Chen L	30	0.163
Lee H	30	0.163
Sharma A	30	0.163
Wang H	30	0.163
Wang X	30	0.163
Amanat F	29	0.158
Gilbert SC	29	0.158
Kumar P	29	0.158
Talbot HK	29	0.158
Kim M	28	0.152
Kumar D	28	0.152
Kumar R	28	0.152
Liu L	28	0.152
Zhao Y	28	0.152
Kawaoka Y	27	0.147
Li Q	27	0.147
Lu L	27	0.147
Patel A	27	0.147
Suthar MS	27	0.147
To KKW	27	0.147
Ali S	26	0.142
Corti D	26	0.142
Dimopoulos MA	26	0.142
Gaglani M	26	0.142
Khan S	26	0.142
Li N	26	0.142
Lin CY	26	0.142
Mclellan JS	26	0.142
Pessaint L	26	0.142
Wu J	26	0.142
Yu JY	26	0.142
Gupta A	25	0.136
Khan MA	25	0.136
Li M	25	0.136
Liu C	25	0.136
Lustig Y	25	0.136
Robertson C	25	0.136
Zhou J	25	0.136
Ahmad S	24	0.131
Atyeo C	24	0.131
Huang Y	24	0.131
Lee JH	24	0.131
Liu H	24	0.131
Martinez DR	24	0.131
Sharma P	24	0.131
Singh A	24	0.131
Yang J	24	0.131
Zhang Q	24	0.131
Case JB	23	0.125
Chen C	23	0.125
Chen X	23	0.125
Cook A	23	0.125
Grifoni A	23	0.125
Gupta N	23	0.125
Kim Y	23	0.125
Mcmahan K	23	0.125
Schafer A	23	0.125
Singh R	23	0.125
Veesler D	23	0.125
Weiskopf D	23	0.125
Zhang Z	23	0.125
Ali A	22	0.12
Carroll MW	22	0.12
Drosten C	22	0.12
Li C	22	0.12
Li F	22	0.12
Liu M	22	0.12
Liu S	22	0.12
Patel S	22	0.12
Sahin U	22	0.12
Sun J	22	0.12
Terpos E	22	0.12
Verani JR	22	0.12
Walls AC	22	0.12
Wang M	22	0.12
Zhang H	22	0.12
Anderson EJ	21	0.114
Chan JFW	21	0.114
Chandrashekar A	21	0.114
Cohen C	21	0.114
Corbett KS	21	0.114
Gao GF	21	0.114
Hung IFN	21	0.114
Kumar N	21	0.114
Li R	21	0.114
Mascola JR	21	0.114
Wang P	21	0.114
Wang XW	21	0.114
Yang L	21	0.114
Chen J	20	0.109
Chen RE	20	0.109
Chen YX	20	0.109
Dold C	20	0.109
Finzi A	20	0.109
Jacob-dolan C	20	0.109
Kim H	20	0.109
Kim SH	20	0.109
Leist SR	20	0.109
Lipsitch M	20	0.109
Liu ZM	20	0.109
Omer SB	20	0.109
Pekosz A	20	0.109
Qin CF	20	0.109
Chen W	19	0.103
Chen YH	19	0.103
Dhama K	19	0.103
Hoffmann M	19	0.103
Kim JH	19	0.103
Lee JY	19	0.103
Patel MM	19	0.103
Schrag SJ	19	0.103
Wang B	19	0.103
Zhang X	19	0.103
Amirthalingam G	18	0.098
Bibi S	18	0.098
Chen WH	18	0.098
Chu H	18	0.098
Deng YQ	18	0.098
Dormitzer PR	18	0.098
Edara VV	18	0.098
Hallis B	18	0.098
Jain A	18	0.098
Jiang SB	18	0.098
Jit M	18	0.098
Kastritis E	18	0.098
Kumar V	18	0.098
Li K	18	0.098
Liu B	18	0.098
Mahmud S	18	0.098
Moss P	18	0.098
Ramsay M	18	0.098
Regev-yochay G	18	0.098
Schuitemaker H	18	0.098
Singh P	18	0.098
Tostanoski LH	18	0.098
Wang R	18	0.098
Aley PK	17	0.093
Andrews N	17	0.093
Baden LR	17	0.093
Biswas S	17	0.093
Carfi A	17	0.093
Castilletti C	17	0.093
Chen HL	17	0.093
Chen LL	17	0.093
Chen Q	17	0.093
Chen Z	17	0.093
Corey L	17	0.093
De Oliveira T	17	0.093
Fischinger S	17	0.093
Garcia-sastre A	17	0.093
Hotez PJ	17	0.093
Li QQ	17	0.093
Martin ET	17	0.093
Martinez-sobrido L	17	0.093
Park H	17	0.093
Park J	17	0.093
Peng C	17	0.093
Schmidt AG	17	0.093
Subbarao K	17	0.093
Sun L	17	0.093
Trougakos IP	17	0.093
Al-tawfiq JA	16	0.087
Ali M	16	0.087
Banerjee A	16	0.087
Belij-rammerstorfer S	16	0.087
Bieniasz PD	16	0.087
Cao H	16	0.087
Chen T	16	0.087
Chen ZW	16	0.087
Chu HY	16	0.087
Cohen D	16	0.087
Cowling BJ	16	0.087
Das S	16	0.087
Gupta R	16	0.087
Haagmans BL	16	0.087
Halfmann PJ	16	0.087
Ho DD	16	0.087
Khan M	16	0.087
Kumar M	16	0.087
Lee M	16	0.087
Li B	16	0.087
Li LJ	16	0.087
Lin YL	16	0.087
Liu X	16	0.087
Luo Y	16	0.087
Macintyre CR	16	0.087
Moore PL	16	0.087
Neuzil KM	16	0.087
Park S	16	0.087
Patel K	16	0.087
Riad A	16	0.087
Singh B	16	0.087
Singh G	16	0.087
Singh N	16	0.087
Stuart DI	16	0.087
Suzuki T	16	0.087
Swanson KA	16	0.087
Virgin HW	16	0.087
Wang LS	16	0.087
Ward AB	16	0.087
Wei DQ	16	0.087
Agrawal U	15	0.082
Akbari A	15	0.082
Alroy-preis S	15	0.082
Baldanti F	15	0.082
Bottazzi ME	15	0.082
Butt AA	15	0.082
Cao L	15	0.082
Chen H	15	0.082
Chen SY	15	0.082
Corman VM	15	0.082
Dutta S	15	0.082
Ellebedy AH	15	0.082
Gao F	15	0.082
Gao H	15	0.082
Ghosh P	15	0.082
Gingras AC	15	0.082
Hatziioannou T	15	0.082
He ZL	15	0.082
Hossain MA	15	0.082
Islam MS	15	0.082
Kar S	15	0.082
Katikireddi SV	15	0.082
Ke CW	15	0.082
Kent SJ	15	0.082
Kim K	15	0.082
Klugar M	15	0.082
Kwong PD	15	0.082
Ladhani SN	15	0.082
Li T	15	0.082
Li XG	15	0.082
Li XM	15	0.082
Li ZJ	15	0.082
Liu SY	15	0.082
Lye DC	15	0.082
Madhi SA	15	0.082
Nussenzweig MC	15	0.082
Pohlmann S	15	0.082
Rodriguez-morales AJ	15	0.082
Roy S	15	0.082
Sadarangani M	15	0.082
Sanders RW	15	0.082
Simpson CR	15	0.082
Tan TK	15	0.082
Tobian AAR	15	0.082
Van Gils MJ	15	0.082
Voysey M	15	0.082
Wang LF	15	0.082
Wolf J	15	0.082
Wu JJ	15	0.082
Zhang W	15	0.082
Abraham P	14	0.076
Ahmed A	14	0.076
Ali MA	14	0.076
Bowen JE	14	0.076
Brown R	14	0.076
Burton DR	14	0.076
Chan KH	14	0.076
Chappell JD	14	0.076
Charlton S	14	0.076
Chen XY	14	0.076
Colavita F	14	0.076
Cooper D	14	0.076
Douek DC	14	0.076
Dube E	14	0.076
Faust SN	14	0.076
Floyd K	14	0.076
Gavriatopoulou M	14	0.076
Guo J	14	0.076
Guo Y	14	0.076
Haynes BF	14	0.076
He X	14	0.076
Huang YX	14	0.076
Ippolito G	14	0.076
Islam S	14	0.076
Joshi A	14	0.076
Jung J	14	0.076
Juno JA	14	0.076
Kang J	14	0.076
Khan F	14	0.076
Kim D	14	0.076
Kim YJ	14	0.076
Klein NP	14	0.076
Klenerman P	14	0.076
Lai LL	14	0.076
Lau JTF	14	0.076
Lee SS	14	0.076
Li CG	14	0.076
Li JX	14	0.076
Li XF	14	0.076
Li YZ	14	0.076
Li ZY	14	0.076
Liu XL	14	0.076
Liu YH	14	0.076
Lu J	14	0.076
Mandelboim M	14	0.076
Matusali G	14	0.076
Menachery VD	14	0.076
Mendelson E	14	0.076
Mercado NB	14	0.076
Meschi S	14	0.076
Mongkolsapaya J	14	0.076
Montefiori DC	14	0.076
Monto AS	14	0.076
Muecksch F	14	0.076
Mulligan MJ	14	0.076
Neyts J	14	0.076
Nguyen TT	14	0.076
Nie JH	14	0.076
Patel P	14	0.076
Peng Y	14	0.076
Perlman S	14	0.076
Pinto D	14	0.076
Poovorawan Y	14	0.076
Rahav G	14	0.076
Rahman MM	14	0.076
Rezaei N	14	0.076
Savulescu J	14	0.076
Schmidt F	14	0.076
Schwartz O	14	0.076
Screaton GR	14	0.076
Sharma N	14	0.076
Sharma R	14	0.076
Shi W	14	0.076
Shi ZL	14	0.076
Tureci O	14	0.076
Wang YX	14	0.076
Wegmann F	14	0.076
Whelan SPJ	14	0.076
Wilson IA	14	0.076
Young BE	14	0.076
Zhang XY	14	0.076
Zhao H	14	0.076
Abu-raddad LJ	13	0.071
Agrati C	13	0.071
Allen JD	13	0.071
Anonymous	13	0.071
Babcock HM	13	0.071
Bhargava B	13	0.071
Bin Emran T	13	0.071
Bloch EM	13	0.071
Bloom JD	13	0.071
Braun J	13	0.071
Chakraborty C	13	0.071
Chakraborty S	13	0.071
Chang SY	13	0.071
Chodick G	13	0.071
Chui CSL	13	0.071
Costantino C	13	0.071
Daley MF	13	0.071
Dejnirattisai W	13	0.071
Dong T	13	0.071
Feldman J	13	0.071
Fremont DH	13	0.071
Gagne M	13	0.071
Galli M	13	0.071
Gao Y	13	0.071
Gazit S	13	0.071
Goyette G	13	0.071
Greninger AL	13	0.071
Gupta RK	13	0.071
Haslacher H	13	0.071
Huang BY	13	0.071
Huang DL	13	0.071
Indenbaum V	13	0.071
Ito M	13	0.071
Jain S	13	0.071
Khan MS	13	0.071
Lee GM	13	0.071
Lee N	13	0.071
Lee Y	13	0.071
Li QH	13	0.071
Li S	13	0.071
Li YY	13	0.071
Lippi G	13	0.071
Liu Q	13	0.071
Liu XX	13	0.071
Liu YX	13	0.071
Lucero-prisno DE	13	0.071
Mcelfish PA	13	0.071
Mishra S	13	0.071
Mukherjee S	13	0.071
Naleway AL	13	0.071
Ntanasis-stathopoulos I	13	0.071
Oliver SE	13	0.071
Pajon R	13	0.071
Panda S	13	0.071
Patalon T	13	0.071
Qin C	13	0.071
Richard J	13	0.071
Segev DL	13	0.071
Smith C	13	0.071
Snell G	13	0.071
Sullivan NJ	13	0.071
Sun Y	13	0.071
Tan WJ	13	0.071
Temsah MH	13	0.071
Tenforde MW	13	0.071
Vasileiou E	13	0.071
Wagner R	13	0.071
Wang YJ	13	0.071
Wang YL	13	0.071
Wang Z	13	0.071
Weissman D	13	0.071
Xie XP	13	0.071
Ali H	12	0.065
Angulo FJ	12	0.065
Azziz-baumgartner E	12	0.065
Balicer RD	12	0.065
Bao LL	12	0.065
Barnes E	12	0.065
Beer M	12	0.065
Bernal JL	12	0.065
Bhattacharya M	12	0.065
Bittaye M	12	0.065
Bondzie EA	12	0.065
Bosch BJ	12	0.065
Broderick KE	12	0.065
Bruel T	12	0.065
Cameroni E	12	0.065
Carter L	12	0.065
Cassaniti I	12	0.065
Chang AQ	12	0.065
Chen B	12	0.065
Chen HB	12	0.065
Chen JH	12	0.065
Chen P	12	0.065
Chen YL	12	0.065
De La Sen M	12	0.065
De Lusignan S	12	0.065
De Marco A	12	0.065
Deng W	12	0.065
Dinnon KH	12	0.065
Edwards DK	12	0.065
Flaxman A	12	0.065
Folegatti PM	12	0.065
Gaebler C	12	0.065
Gee J	12	0.065
Giannarelli D	12	0.065
Giovanetti M	12	0.065
Gumeni S	12	0.065
Halwani R	12	0.065
Hasan MR	12	0.065
Hu YL	12	0.065
Huppert A	12	0.065
Hussain S	12	0.065
Icardi G	12	0.065
Jansen KU	12	0.065
Jenkin D	12	0.065
Khunti K	12	0.065
Khurana S	12	0.065
Kim JY	12	0.065
Lai FTT	12	0.065
Lei H	12	0.065
Showing 500 out of 99,181 entries
1 record(s) (0.005%) do not contain data in the field being analyzed

## Sheet: Affiliations
Affiliations	Record Count	% of 18,370
LEAGUE OF EUROPEAN RESEARCH UNIVERSITIES LERU	1586	8.634
HARVARD UNIVERSITY	609	3.315
UNIVERSITY OF LONDON	593	3.228
UNIVERSITY OF CALIFORNIA SYSTEM	518	2.82
UNIVERSITY OF OXFORD	377	2.052
HARVARD MEDICAL SCHOOL	363	1.976
UDICE FRENCH RESEARCH UNIVERSITIES	346	1.884
UNIVERSITY OF TEXAS SYSTEM	301	1.639
JOHNS HOPKINS UNIVERSITY	295	1.606
NATIONAL INSTITUTES OF HEALTH NIH USA	283	1.541
UNIVERSITY COLLEGE LONDON	267	1.453
UNIVERSITY OF WASHINGTON	261	1.421
EGYPTIAN KNOWLEDGE BANK EKB	260	1.415
UNIVERSITY OF WASHINGTON SEATTLE	257	1.399
INSTITUT NATIONAL DE LA SANTE ET DE LA RECHERCHE MEDICALE INSERM	248	1.35
TEL AVIV UNIVERSITY	241	1.312
CHINESE ACADEMY OF SCIENCES	227	1.236
CENTERS FOR DISEASE CONTROL PREVENTION USA	214	1.165
IMPERIAL COLLEGE LONDON	214	1.165
SACKLER FACULTY OF MEDICINE	210	1.143
UNIVERSITY OF TORONTO	207	1.127
LONDON SCHOOL OF HYGIENE TROPICAL MEDICINE	205	1.116
UNIVERSITY OF NORTH CAROLINA	205	1.116
MASSACHUSETTS GENERAL HOSPITAL	198	1.078
PENNSYLVANIA COMMONWEALTH SYSTEM OF HIGHER EDUCATION PCSHE	197	1.072
STANFORD UNIVERSITY	195	1.062
UNIVERSITY OF PENNSYLVANIA	180	0.98
CENTRE NATIONAL DE LA RECHERCHE SCIENTIFIQUE CNRS	176	0.958
EMORY UNIVERSITY	176	0.958
YALE UNIVERSITY	172	0.936
STATE UNIVERSITY SYSTEM OF FLORIDA	170	0.925
JOHNS HOPKINS BLOOMBERG SCHOOL OF PUBLIC HEALTH	167	0.909
UNIVERSITY OF NORTH CAROLINA CHAPEL HILL	166	0.904
NIH NATIONAL INSTITUTE OF ALLERGY INFECTIOUS DISEASES NIAID	162	0.882
UNIVERSITY OF CALIFORNIA SAN FRANCISCO	154	0.838
UNIVERSITY OF MELBOURNE	154	0.838
UNIVERSITY OF CAMBRIDGE	151	0.822
ICAHN SCHOOL OF MEDICINE AT MOUNT SINAI	149	0.811
MASSACHUSETTS INSTITUTE OF TECHNOLOGY MIT	149	0.811
UNIVERSITE DE PARIS	148	0.806
UNIVERSITY OF HONG KONG	147	0.8
CORNELL UNIVERSITY	144	0.784
HARVARD T H CHAN SCHOOL OF PUBLIC HEALTH	144	0.784
UNIVERSITY OF MICHIGAN	144	0.784
UNIVERSITY OF MICHIGAN SYSTEM	144	0.784
UNIVERSITY OF CALIFORNIA LOS ANGELES	142	0.773
COLUMBIA UNIVERSITY	138	0.751
CHINESE ACADEMY OF MEDICAL SCIENCES PEKING UNION MEDICAL COLLEGE	137	0.746
US DEPARTMENT OF VETERANS AFFAIRS	137	0.746
ASSISTANCE PUBLIQUE HOPITAUX PARIS APHP	136	0.74
KING SAUD UNIVERSITY	135	0.735
UNIVERSITY OF MILAN	133	0.724
UNIVERSITY SYSTEM OF MARYLAND	132	0.719
VETERANS HEALTH ADMINISTRATION VHA	131	0.713
UNIVERSITY SYSTEM OF GEORGIA	129	0.702
NATIONAL UNIVERSITY OF SINGAPORE	125	0.68
FUDAN UNIVERSITY	124	0.675
WASHINGTON UNIVERSITY WUSTL	124	0.675
BRIGHAM WOMEN S HOSPITAL	122	0.664
LE RESEAU INTERNATIONAL DES INSTITUTS PASTEUR RIIP	121	0.659
UNIVERSIDADE DE SAO PAULO	121	0.659
SAPIENZA UNIVERSITY ROME	120	0.653
DUKE UNIVERSITY	119	0.648
MONASH UNIVERSITY	119	0.648
NATIONAL KAPODISTRIAN UNIVERSITY OF ATHENS	118	0.642
MAYO CLINIC	117	0.637
VANDERBILT UNIVERSITY	117	0.637
WORLD HEALTH ORGANIZATION	117	0.637
KING S COLLEGE LONDON	116	0.631
UNIVERSITY OF CALIFORNIA SAN DIEGO	116	0.631
GERMAN CENTER FOR INFECTION RESEARCH	113	0.615
PUBLIC HEALTH ENGLAND	113	0.615
UNIVERSITY OF BRITISH COLUMBIA	112	0.61
UNIVERSITY OF SYDNEY	111	0.604
MINIST HLTH	108	0.588
PEKING UNIVERSITY	107	0.582
UNIVERSITY OF COLORADO SYSTEM	107	0.582
UNIVERSITY OF EDINBURGH	107	0.582
UNIVERSITY OF NEW SOUTH WALES SYDNEY	105	0.572
MCGILL UNIVERSITY	104	0.566
FREE UNIVERSITY OF BERLIN	103	0.561
UNIVERSITY OF PITTSBURGH	103	0.561
KAROLINSKA INSTITUTET	101	0.55
INDIAN INSTITUTE OF TECHNOLOGY SYSTEM IIT SYSTEM	99	0.539
KING ABDULAZIZ UNIVERSITY	99	0.539
UNIVERSITY OF CHINESE ACADEMY OF SCIENCES CAS	99	0.539
UNIVERSITY OF COPENHAGEN	98	0.533
CHAIM SHEBA MEDICAL CENTER	96	0.523
HELMHOLTZ ASSOCIATION	96	0.523
PEKING UNION MEDICAL COLLEGE	96	0.523
SORBONNE UNIVERSITE	95	0.517
CIBER CENTRO DE INVESTIGACION BIOMEDICA EN RED	94	0.512
FRED HUTCHINSON CANCER CENTER	94	0.512
OHIO STATE UNIVERSITY	94	0.512
FUNDACAO OSWALDO CRUZ	93	0.506
NORTHWESTERN UNIVERSITY	93	0.506
BETH ISRAEL DEACONESS MEDICAL CENTER	92	0.501
RAGON INSTITUTE	92	0.501
CHINESE UNIVERSITY OF HONG KONG	91	0.495
HEBREW UNIVERSITY OF JERUSALEM	91	0.495
UNIVERSITY OF MARYLAND BALTIMORE	89	0.484
UNIVERSITY OF GENEVA	88	0.479
HUMBOLDT UNIVERSITY OF BERLIN	87	0.474
STATE UNIVERSITY OF NEW YORK SUNY SYSTEM	87	0.474
UNIVERSITY OF COLORADO ANSCHUTZ MEDICAL CAMPUS	87	0.474
UTAH SYSTEM OF HIGHER EDUCATION	86	0.468
BAYLOR COLLEGE OF MEDICINE	85	0.463
UNIVERSITY OF ALABAMA SYSTEM	85	0.463
UNIVERSITY OF ILLINOIS SYSTEM	85	0.463
UNIVERSITY OF WISCONSIN SYSTEM	85	0.463
CHARITE UNIVERSITATSMEDIZIN BERLIN	84	0.457
NEW YORK UNIVERSITY	84	0.457
INDIANA UNIVERSITY SYSTEM	83	0.452
SEOUL NATIONAL UNIVERSITY SNU	82	0.446
BOSTON CHILDREN S HOSPITAL	81	0.441
SUN YAT SEN UNIVERSITY	81	0.441
UNIVERSITY OF BERN	81	0.441
JOHNS HOPKINS MEDICINE	80	0.435
UNIVERSITE DE MONTREAL	80	0.435
UNIVERSITY OF PADUA	80	0.435
UNIVERSITY OF TEXAS MEDICAL BRANCH GALVESTON	80	0.435
UNIVERSITY OF BARCELONA	79	0.43
UNIVERSITY OF QUEENSLAND	79	0.43
TEHRAN UNIVERSITY OF MEDICAL SCIENCES	78	0.425
TSINGHUA UNIVERSITY	78	0.425
UNIVERSITE PARIS SACLAY	78	0.425
UNIVERSITY OF AMSTERDAM	78	0.425
UNIVERSITY OF MANCHESTER	78	0.425
BEN GURION UNIVERSITY	77	0.419
BOSTON UNIVERSITY	77	0.419
MCMASTER UNIVERSITY	77	0.419
UNIVERSITY OF KWAZULU NATAL	77	0.419
UNIVERSITY OF WISCONSIN MADISON	77	0.419
UNIVERSITY OF WITWATERSRAND	77	0.419
CHINESE CENTER FOR DISEASE CONTROL PREVENTION	76	0.414
ERASMUS UNIVERSITY ROTTERDAM	76	0.414
HOWARD HUGHES MEDICAL INSTITUTE	76	0.414
KU LEUVEN	76	0.414
MEDICAL UNIVERSITY OF VIENNA	76	0.414
UNIVERSITY OF CAPE TOWN	76	0.414
TEXAS A M UNIVERSITY SYSTEM	75	0.408
UNIVERSITY OF ALBERTA	75	0.408
SHANGHAI JIAO TONG UNIVERSITY	74	0.403
UNIVERSITY OF MINNESOTA SYSTEM	74	0.403
UNIVERSITY OF LIVERPOOL	73	0.397
HUAZHONG UNIVERSITY OF SCIENCE TECHNOLOGY	72	0.392
MAHIDOL UNIVERSITY	72	0.392
UNIVERSITY OF ALABAMA BIRMINGHAM	72	0.392
UNIVERSITY OF FLORIDA	72	0.392
UTRECHT UNIVERSITY	72	0.392
CATHOLIC UNIVERSITY OF THE SACRED HEART	71	0.386
RUTGERS STATE UNIVERSITY NEW BRUNSWICK	71	0.386
UNIVERSITY OF OTTAWA	71	0.386
BROWN UNIVERSITY	70	0.381
INSTITUT PASTEUR PARIS	70	0.381
AIX MARSEILLE UNIVERSITE	69	0.376
FEINBERG SCHOOL OF MEDICINE	69	0.376
UNIVERSITA DEGLI STUDI DI BARI ALDO MORO	68	0.37
CONSIGLIO NAZIONALE DELLE RICERCHE CNR	67	0.365
UNIVERSITY OF TOKYO	67	0.365
CONSEJO SUPERIOR DE INVESTIGACIONES CIENTIFICAS CSIC	66	0.359
ERASMUS MC	66	0.359
INDIANA UNIVERSITY BLOOMINGTON	66	0.359
TECHNION ISRAEL INSTITUTE OF TECHNOLOGY	66	0.359
UNITED STATES DEPARTMENT OF ENERGY DOE	66	0.359
UNIVERSITY OF MIAMI	66	0.359
UNIVERSITY OF MINNESOTA TWIN CITIES	66	0.359
UNIVERSITY OF UTAH	66	0.359
AUTONOMOUS UNIVERSITY OF BARCELONA	63	0.343
NEWYORK PRESBYTERIAN HOSPITAL	63	0.343
SHAHID BEHESHTI UNIVERSITY MEDICAL SCIENCES	63	0.343
UNIVERSITY OF FLORENCE	63	0.343
CNRS NATIONAL INSTITUTE FOR BIOLOGY INSB	62	0.338
IRCCS POLICLINICO GEMELLI	62	0.338
NIH NATIONAL CANCER INSTITUTE NCI	62	0.338
GEORGE WASHINGTON UNIVERSITY	61	0.332
INDIAN COUNCIL OF MEDICAL RESEARCH ICMR	61	0.332
RUPRECHT KARLS UNIVERSITY HEIDELBERG	61	0.332
SCRIPPS RESEARCH INSTITUTE	61	0.332
CLEVELAND CLINIC FOUNDATION	60	0.327
KAISER PERMANENTE	60	0.327
PENNSYLVANIA STATE UNIVERSITY	60	0.327
UNIVERSITY OF GLASGOW	60	0.327
UNIVERSITY OF BIRMINGHAM	59	0.321
UNIVERSITY OF MUNICH	59	0.321
OREGON HEALTH SCIENCE UNIVERSITY	58	0.316
RAPPAPORT FACULTY OF MEDICINE	58	0.316
UNIVERSITY OF ROME TOR VERGATA	58	0.316
UNIVERSITY OF SOUTHERN CALIFORNIA	58	0.316
MAX PLANCK SOCIETY	57	0.31
MURDOCH CHILDREN S RESEARCH INSTITUTE	57	0.31
UNIVERSITY OF CALGARY	57	0.31
SICHUAN UNIVERSITY	56	0.305
UNIVERSITY OF CALIFORNIA BERKELEY	56	0.305
UNIVERSITY OF CHICAGO	56	0.305
CASE WESTERN RESERVE UNIVERSITY	55	0.299
EBERHARD KARLS UNIVERSITY OF TUBINGEN	55	0.299
GUANGZHOU MEDICAL UNIVERSITY	55	0.299
HAMAD MEDICAL CORPORATION	55	0.299
UK RESEARCH INNOVATION UKRI	55	0.299
UNIVERSITY OF ARIZONA	55	0.299
ZHEJIANG UNIVERSITY	55	0.299
AARHUS UNIVERSITY	54	0.294
UNIVERSITY OF NORTH CAROLINA SCHOOL OF MEDICINE	54	0.294
ALL INDIA INSTITUTE OF MEDICAL SCIENCES AIIMS NEW DELHI	53	0.289
ATHENS MEDICAL SCHOOL	53	0.289
OXFORD UNIVERSITY HOSPITALS NHS FOUNDATION TRUST	53	0.289
UNIVERSITY OF IOWA	53	0.289
CAPITAL MEDICAL UNIVERSITY	52	0.283
DAVID GEFFEN SCHOOL OF MEDICINE AT UCLA	51	0.278
INSTITUT DE RECHERCHE POUR LE DEVELOPPEMENT IRD	51	0.278
UNIVERSITY HEALTH NETWORK TORONTO	51	0.278
COUNCIL OF SCIENTIFIC INDUSTRIAL RESEARCH CSIR INDIA	50	0.272
HONG KONG POLYTECHNIC UNIVERSITY	50	0.272
HOSPITAL CLINIC DE BARCELONA	50	0.272
ISTITUTO SUPERIORE DI SANITA ISS	50	0.272
QUEEN MARY UNIVERSITY LONDON	50	0.272
UNIVERSITY OF HAMBURG	50	0.272
UNIVERSITY OF SOUTHAMPTON	50	0.272
CHILDRENS HOSPITAL OF PHILADELPHIA	49	0.267
CINCINNATI CHILDREN S HOSPITAL MEDICAL CENTER	49	0.267
GUY S ST THOMAS NHS FOUNDATION TRUST	49	0.267
KIRBY INSTITUTE	49	0.267
RUSSIAN ACADEMY OF SCIENCES	49	0.267
TAIF UNIVERSITY	49	0.267
UNIVERSITY OF BOLOGNA	49	0.267
UNIVERSITY OF GENOA	49	0.267
UNIVERSITY OF GEORGIA	49	0.267
BAR ILAN UNIVERSITY	48	0.261
IRCCS CA GRANDA OSPEDALE MAGGIORE POLICLINICO	48	0.261
PFIZER	48	0.261
TUFTS UNIVERSITY	48	0.261
UNIVERSITA DELLA CAMPANIA VANVITELLI	48	0.261
UNITED STATES DEPARTMENT OF DEFENSE	47	0.256
UNIVERSITY MEDICAL CENTER HAMBURG EPPENDORF	47	0.256
UNIVERSITY OF BRISTOL	47	0.256
UNIVERSITY OF NAPLES FEDERICO II	47	0.256
UNIVERSITY OF TEXAS AUSTIN	47	0.256
UNIVERSITY OF TEXAS SOUTHWESTERN MEDICAL CENTER DALLAS	47	0.256
UNIVERSITY OF ZURICH	47	0.256
US FOOD DRUG ADMINISTRATION FDA	47	0.256
CAIRO UNIVERSITY	46	0.25
CHARLES UNIVERSITY PRAGUE	46	0.25
MICHIGAN STATE UNIVERSITY	46	0.25
NATIONAL TAIWAN UNIVERSITY	46	0.25
STELLENBOSCH UNIVERSITY	46	0.25
UNIVERSITY OF GRONINGEN	46	0.25
UNIVERSITY OF KANSAS	46	0.25
CHULALONGKORN UNIVERSITY	45	0.245
KAROLINSKA UNIVERSITY HOSPITAL	45	0.245
KING SAUD BIN ABDULAZIZ UNIVERSITY FOR HEALTH SCIENCES	45	0.245
SOUTHERN MEDICAL UNIVERSITY CHINA	45	0.245
ASSISTANCE PUBLIQUE HOPITAUX DE MARSEILLE	44	0.24
BIOTECHNOLOGY AND BIOLOGICAL SCIENCES RESEARCH COUNCIL BBSRC	44	0.24
COMPLUTENSE UNIVERSITY OF MADRID	44	0.24
RADBOUD UNIVERSITY NIJMEGEN	44	0.24
ST GEORGES UNIVERSITY LONDON	44	0.24
UNIVERSITY OF OSLO	44	0.24
WUHAN UNIVERSITY	44	0.24
CITY UNIVERSITY OF NEW YORK CUNY SYSTEM	43	0.234
GHENT UNIVERSITY	43	0.234
HANNOVER MEDICAL SCHOOL	43	0.234
INSTITUTO DE SALUD CARLOS III	43	0.234
UNIVERSITY OF NOTTINGHAM	43	0.234
UNIVERSITY OF SIENA	43	0.234
UNIVERSITY OF VERONA	43	0.234
AGENCY FOR SCIENCE TECHNOLOGY RESEARCH ASTAR	42	0.229
BIOQUAL INC	42	0.229
DANA FARBER CANCER INSTITUTE	42	0.229
DEPARTMENT OF BIOTECHNOLOGY DBT INDIA	42	0.229
JORDAN UNIVERSITY OF SCIENCE TECHNOLOGY	42	0.229
LAVAL UNIVERSITY	42	0.229
NANYANG TECHNOLOGICAL UNIVERSITY	42	0.229
NANYANG TECHNOLOGICAL UNIVERSITY NATIONAL INSTITUTE OF EDUCATION NIE SINGAPORE	42	0.229
UNIVERSITE DE MONTPELLIER	42	0.229
UNIVERSITY OF ANTWERP	42	0.229
UNIVERSITY OF CALIFORNIA DAVIS	42	0.229
UNIVERSITY OF DUISBURG ESSEN	42	0.229
UNIVERSITY OF LAUSANNE	42	0.229
ROLLINS SCHOOL PUBLIC HEALTH	41	0.223
SOUTH AFRICAN MEDICAL RESEARCH COUNCIL	41	0.223
UNIVERSITY OF CINCINNATI	41	0.223
UNIVERSITY OF ERLANGEN NUREMBERG	41	0.223
UNIVERSITY OF ILLINOIS CHICAGO	41	0.223
UNIVERSITY OF MANITOBA	41	0.223
UNIVERSITY OF MASSACHUSETTS SYSTEM	41	0.223
UNIVERSITY OF WESTERN AUSTRALIA	41	0.223
CONSEJO NACIONAL DE INVESTIGACIONES CIENTIFICAS Y TECNICAS CONICET	40	0.218
JAZAN UNIVERSITY	40	0.218
LEIDEN UNIVERSITY	40	0.218
MEDICAL UNIVERSITY OF WARSAW	40	0.218
QASSIM UNIVERSITY	40	0.218
TEL AVIV SOURASKY MEDICAL CENTER	40	0.218
TEXAS A M UNIVERSITY COLLEGE STATION	40	0.218
TULANE UNIVERSITY	40	0.218
UNIVERSIDADE FEDERAL DE MINAS GERAIS	40	0.218
UNIVERSITY HOSPITAL OF BERN	40	0.218
VITA SALUTE SAN RAFFAELE UNIVERSITY	40	0.218
ALBERT EINSTEIN COLLEGE OF MEDICINE	39	0.212
ARISTOTLE UNIVERSITY OF THESSALONIKI	39	0.212
CALIFORNIA STATE UNIVERSITY SYSTEM	39	0.212
KOREA UNIVERSITY	39	0.212
NATIONAL INSTITUTE OF TECHNOLOGY NIT SYSTEM	39	0.212
ROYAL CHILDREN S HOSPITAL MELBOURNE	39	0.212
SEATTLE CHILDREN S HOSPITAL	39	0.212
UNIVERSITE LIBRE DE BRUXELLES	39	0.212
UNIVERSITY COLLEGE LONDON HOSPITALS NHS FOUNDATION TRUST	39	0.212
UNIVERSITY OF HAIFA	39	0.212
UNIVERSITY OF JORDAN	39	0.212
UNIVERSITY OF LEEDS	39	0.212
UNIVERSITY OF ROCHESTER	39	0.212
UNIVERSITY OF SASKATCHEWAN	39	0.212
YESHIVA UNIVERSITY	39	0.212
CHINA MEDICAL UNIVERSITY TAIWAN	38	0.207
EBERHARD KARLS UNIVERSITY HOSPITAL	38	0.207
KING KHALID UNIVERSITY	38	0.207
NATIONAL INSTITUTE FOR VIRAL DISEASE CONTROL PREVENTION CHINESE CENTER FOR DISEASE CONTROL PREVENTION	38	0.207
NATL INST FOOD DRUG CONTROL	38	0.207
RUTGERS STATE UNIVERSITY MEDICAL CENTER	38	0.207
SOUTHERN UNIVERSITY OF SCIENCE TECHNOLOGY	38	0.207
AIN SHAMS UNIVERSITY	37	0.201
ALEXANDRIA UNIVERSITY	37	0.201
HEINRICH HEINE UNIVERSITY DUSSELDORF	37	0.201
IRCCS BAMBINO GESU	37	0.201
IRCCS OSPEDALE SAN RAFFAELE	37	0.201
LUIGI SACCO HOSPITAL	37	0.201
QATAR UNIVERSITY	37	0.201
UNIVERSIDAD NACIONAL AUTONOMA DE MEXICO	37	0.201
UNIVERSITY OF PRETORIA	37	0.201
UNIVERSITY OF WARWICK	37	0.201
ARIZONA STATE UNIVERSITY	36	0.196
AUSTRALIAN NATIONAL UNIVERSITY	36	0.196
CHINESE ACADEMY OF AGRICULTURAL SCIENCES	36	0.196
CLALIT HEALTH SERVICES	36	0.196
HACETTEPE UNIVERSITY	36	0.196
INDIANA UNIVERSITY PURDUE UNIVERSITY INDIANAPOLIS	36	0.196
MEDICAL UNIVERSITY OF INNSBRUCK	36	0.196
SECHENOV FIRST MOSCOW STATE MEDICAL UNIVERSITY	36	0.196
TEMPLE UNIVERSITY	36	0.196
UNIVERSIDADE FEDERAL DE SAO PAULO UNIFESP	36	0.196
UNIVERSITI SAINS MALAYSIA	36	0.196
UNIVERSITY OF GOTTINGEN	36	0.196
UNIVERSITY OF ILLINOIS CHICAGO HOSPITAL	36	0.196
UNIVERSITY OF PAVIA	36	0.196
UNIVERSITY OF TENNESSEE SYSTEM	36	0.196
WUHAN INSTITUTE OF VIROLOGY CAS	36	0.196
CIBERESP	35	0.191
DALHOUSIE UNIVERSITY	35	0.191
INSTITUTE OF MEDICAL BIOLOGY CAMS	35	0.191
PENNSYLVANIA STATE UNIVERSITY UNIVERSITY PARK	35	0.191
STATE KEY LABORATORY OF RESPIRATORY DISEASE	35	0.191
TECHNICAL UNIVERSITY OF MUNICH	35	0.191
UNIVERSITE CLAUDE BERNARD LYON 1	35	0.191
UNIVERSITY OF BONN	35	0.191
UNIVERSITY OF CALIFORNIA IRVINE	35	0.191
UNIVERSITY OF NEBRASKA SYSTEM	35	0.191
WELLCOME CENTRE FOR HUMAN GENETICS	35	0.191
GEORGETOWN UNIVERSITY	34	0.185
HOSPITAL UNIVERSITARI VALL D HEBRON	34	0.185
LEIDEN UNIVERSITY EXCL LUMC	34	0.185
SHIRAZ UNIVERSITY OF MEDICAL SCIENCE	34	0.185
SINAI HEALTH SYSTEM TORONTO	34	0.185
AZIENDA OSPEDALIERO UNIVERSITARIA CAREGGI	33	0.18
BAYLOR HEALTH CARE SYSTEM	33	0.18
BROAD INSTITUTE	33	0.18
CENTRAL SOUTH UNIVERSITY	33	0.18
CHILDREN S HEALTHCARE OF ATLANTA CHOA	33	0.18
ETH ZURICH	33	0.18
FAHRENHEIT UNIVERSITIES	33	0.18
FRANCIS CRICK INSTITUTE	33	0.18
NATIONAL CHENG KUNG UNIVERSITY	33	0.18
NETHERLANDS NATIONAL INSTITUTE FOR PUBLIC HEALTH THE ENVIRONMENT	33	0.18
BIONTECH SE	32	0.174
CAROL DAVILA UNIVERSITY OF MEDICINE PHARMACY	32	0.174
GERMAN CANCER RESEARCH CENTER DKFZ	32	0.174
GOETHE UNIVERSITY FRANKFURT	32	0.174
HOSPITAL FOR SICK CHILDREN SICKKIDS	32	0.174
INSTITUTE OF BIOPHYSICS CAS	32	0.174
IRAN UNIVERSITY OF MEDICAL SCIENCES	32	0.174
IRCCS FONDAZIONE SAN MATTEO	32	0.174
LUND UNIVERSITY	32	0.174
MINISTRY OF HEALTH SAUDI ARABIA	32	0.174
NATIONAL INSTITUTE OF INFECTIOUS DISEASES NIID	32	0.174
OSAKA UNIVERSITY	32	0.174
ROCKEFELLER UNIVERSITY	32	0.174
SHANDONG UNIVERSITY	32	0.174
SUNGKYUNKWAN UNIVERSITY SKKU	32	0.174
UNITED STATES ARMY	32	0.174
UNIVERSITY OF BELGRADE	32	0.174
YONSEI UNIVERSITY	32	0.174
AGA KHAN UNIVERSITY	31	0.169
CITY UNIVERSITY OF HONG KONG	31	0.169
IMAM ABDULRAHMAN BIN FAISAL UNIVERSITY	31	0.169
INDIAN COUNCIL OF AGRICULTURAL RESEARCH ICAR	31	0.169
JEFFERSON UNIVERSITY	31	0.169
LOUISIANA STATE UNIVERSITY SYSTEM	31	0.169
NANJING MEDICAL UNIVERSITY	31	0.169
NATIONAL HEALTH LABORATORY SERVICE	31	0.169
PRINCESS NOURAH BINT ABDULRAHMAN UNIVERSITY	31	0.169
PUBL HLTH SCOTLAND	31	0.169
RABIN MEDICAL CENTER	31	0.169
SAINT LOUIS UNIVERSITY	31	0.169
UNIVERSIDADE DE LISBOA	31	0.169
UNIVERSIDADE DO PORTO	31	0.169
UNIVERSITY OF ARKANSAS SYSTEM	31	0.169
UNIVERSITY OF CATANIA	31	0.169
UNIVERSITY OF DHAKA	31	0.169
UNIVERSITY OF GONDAR	31	0.169
UNIVERSITY OF HELSINKI	31	0.169
UNIVERSITY OF IBADAN	31	0.169
UNIVERSITY OF NEW MEXICO	31	0.169
ZHENGZHOU UNIVERSITY	31	0.169
ACADEMIA SINICA TAIWAN	30	0.163
ACADEMY OF MILITARY MEDICAL SCIENCES CHINA	30	0.163
GLAXOSMITHKLINE	30	0.163
KOREA UNIVERSITY MEDICINE KU MEDICINE	30	0.163
LEIDEN UNIVERSITY MEDICAL CENTER LUMC	30	0.163
MAASTRICHT UNIVERSITY	30	0.163
MODERNA INC	30	0.163
NATIONAL YANG MING CHIAO TUNG UNIVERSITY	30	0.163
NORTHWELL HEALTH	30	0.163
POST GRADUATE INSTITUTE OF MEDICAL EDUCATION RESEARCH PGIMER CHANDIGARH	30	0.163
PRINCETON UNIVERSITY	30	0.163
UNIVERSITY OF BASEL	30	0.163
UNIVERSITY OF CONNECTICUT	30	0.163
UNIVERSITY OF LEICESTER	30	0.163
UNIVERSITY OF TURIN	30	0.163
VRIJE UNIVERSITEIT AMSTERDAM	30	0.163
YORK UNIVERSITY CANADA	30	0.163
ALFAISAL UNIVERSITY	29	0.158
ARIEL UNIVERSITY	29	0.158
ARIZONA STATE UNIVERSITY TEMPE	29	0.158
BILL MELINDA GATES FOUNDATION	29	0.158
PUBLIC HEALTH AGENCY OF CANADA	29	0.158
QUEENS UNIVERSITY BELFAST	29	0.158
SEOUL NATIONAL UNIVERSITY HOSPITAL	29	0.158
UNIVERSITY OF FERRARA	29	0.158
UNIVERSITY OF SHEFFIELD	29	0.158
UNIVERSITY OF STRATHCLYDE	29	0.158
ASTRAZENECA	28	0.152
AUTONOMOUS UNIVERSITY OF MADRID	28	0.152
CARDIFF UNIVERSITY	28	0.152
DARTMOUTH COLLEGE	28	0.152
ISLAMIC AZAD UNIVERSITY	28	0.152
POZNAN UNIVERSITY OF MEDICAL SCIENCES	28	0.152
TAIPEI MEDICAL UNIVERSITY	28	0.152
TAN TOCK SENG HOSPITAL	28	0.152
UNIVERSIDADE ESTADUAL PAULISTA	28	0.152
UNIVERSITY OF MILANO BICOCCA	28	0.152
UNIVERSITY OF PALERMO	28	0.152
BERLIN INST HLTH	27	0.147
CEDARS SINAI MEDICAL CENTER	27	0.147
FLOREY INSTITUTE OF NEUROSCIENCE MENTAL HEALTH	27	0.147
GRIFFITH UNIVERSITY	27	0.147
HELMHOLTZ CENTER FOR INFECTION RESEARCH	27	0.147
IRCCS LAZZARO SPALLANZANI	27	0.147
JINAN UNIVERSITY	27	0.147
KAOHSIUNG MEDICAL UNIVERSITY	27	0.147
KUWAIT UNIVERSITY	27	0.147
KYOTO UNIVERSITY	27	0.147
MASHHAD UNIVERSITY MEDICAL SCIENCE	27	0.147
NATIONAL INSTITUTE OF FOOD DRUG CONTROL CHINA	27	0.147
NORTHEASTERN UNIVERSITY	27	0.147
PRINCE OF WALES HOSPITAL	27	0.147
ROYAL FREE LONDON NHS FOUNDATION TRUST	27	0.147
ROYAL MELBOURNE HOSPITAL	27	0.147
RUHR UNIVERSITY BOCHUM	27	0.147
UNIVERSITA DI MODENA E REGGIO EMILIA	27	0.147
UTRECHT UNIVERSITY MEDICAL CENTER	27	0.147
WROCLAW MEDICAL UNIVERSITY	27	0.147
CHANG GUNG MEMORIAL HOSPITAL	26	0.142
EUROPEAN CENTRE FOR DISEASE PREVENTION CONTROL	26	0.142
FONDAZIONE IRCCS ISTITUTO NAZIONALE TUMORI MILAN	26	0.142
G D ANNUNZIO UNIVERSITY OF CHIETI PESCARA	26	0.142
GEORGIA INSTITUTE OF TECHNOLOGY	26	0.142
GEORGIA STATE UNIVERSITY	26	0.142
HOPITAL UNIVERSITAIRE COCHIN APHP	26	0.142
LA JOLLA INST IMMUNOL	26	0.142
LEIPZIG UNIVERSITY	26	0.142
LONDON SCHOOL ECONOMICS POLITICAL SCIENCE	26	0.142
LUNENFELD TANENBAUM RESEARCH INSTITUTE	26	0.142
MASARYK UNIVERSITY BRNO	26	0.142
MEDICAL UNIVERSITY GDANSK	26	0.142
MERCK COMPANY	26	0.142
NATIONAL CENTRE OF INFECTIOUS DISEASES SINGAPORE	26	0.142
NATIONAL TAIWAN UNIVERSITY HOSPITAL	26	0.142
NORWEGIAN INSTITUTE OF PUBLIC HEALTH NIPH	26	0.142
STATE UNIVERSITY OF NEW YORK SUNY BUFFALO	26	0.142
TRINITY COLLEGE DUBLIN	26	0.142
ULM UNIVERSITY	26	0.142
UNIVERSITY OF DELHI	26	0.142
UNIVERSITY OF HEALTH SCIENCES TURKEY	26	0.142
UNIVERSITY OF PISA	26	0.142
UNIVERSITY OF SOUTH FLORIDA	26	0.142
A O U CITTA DELLA SALUTE E DELLA SCIENZA DI TORINO	25	0.136
ASSIUT UNIVERSITY	25	0.136
CHINA MEDICAL UNIVERSITY HOSPITAL TAIWAN	25	0.136
HALLYM UNIVERSITY	25	0.136
HELSINKI UNIVERSITY CENTRAL HOSPITAL	25	0.136
HOPITAL UNIVERSITAIRE PITIE SALPETRIERE APHP	25	0.136
Showing 500 out of 18,351 entries
82 record(s) (0.446%) do not contain data in the field being analyzed

## Sheet: Publication Titles
Publication Titles	Record Count	% of 18,370
VACCINES	965	5.253
VACCINE	365	1.987
PLOS ONE	327	1.78
INTERNATIONAL JOURNAL OF ENVIRONMENTAL RESEARCH AND PUBLIC HEALTH	320	1.742
HUMAN VACCINES IMMUNOTHERAPEUTICS	294	1.6
FRONTIERS IN IMMUNOLOGY	276	1.502
SCIENTIFIC REPORTS	270	1.47
VIRUSES BASEL	225	1.225
FRONTIERS IN PUBLIC HEALTH	169	0.92
CLINICAL INFECTIOUS DISEASES	157	0.855
NATURE COMMUNICATIONS	157	0.855
JOURNAL OF MEDICAL VIROLOGY	151	0.822
JOURNAL OF BIOMOLECULAR STRUCTURE DYNAMICS	141	0.768
CUREUS JOURNAL OF MEDICAL SCIENCE	135	0.735
BMC PUBLIC HEALTH	112	0.61
BMJ OPEN	111	0.604
FRONTIERS IN MEDICINE	102	0.555
INTERNATIONAL JOURNAL OF INFECTIOUS DISEASES	101	0.55
PROCEEDINGS OF THE NATIONAL ACADEMY OF SCIENCES OF THE UNITED STATES OF AMERICA	92	0.501
CUREUS	90	0.49
MMWR MORBIDITY AND MORTALITY WEEKLY REPORT	90	0.49
JOURNAL OF VIROLOGY	89	0.484
NATURE	85	0.463
JAMA NETWORK OPEN	79	0.43
JOURNAL OF INFECTIOUS DISEASES	77	0.419
JOURNAL OF CLINICAL MEDICINE	74	0.403
BMJ CASE REPORTS	71	0.386
NEW ENGLAND JOURNAL OF MEDICINE	71	0.386
NPJ VACCINES	68	0.37
CELL REPORTS	67	0.365
EUROSURVEILLANCE	67	0.365
MBIO	66	0.359
NATURE MEDICINE	64	0.348
MICROBIOLOGY SPECTRUM	63	0.343
SCIENCE	62	0.338
BMC INFECTIOUS DISEASES	61	0.332
HEALTHCARE	59	0.321
JOURNAL OF MEDICAL INTERNET RESEARCH	59	0.321
CELL	55	0.299
EMERGING MICROBES INFECTIONS	54	0.294
JOURNAL OF KOREAN MEDICAL SCIENCE	53	0.289
EXPERT REVIEW OF VACCINES	51	0.278
FRONTIERS IN MICROBIOLOGY	50	0.272
OPEN FORUM INFECTIOUS DISEASES	50	0.272
JMIR PUBLIC HEALTH AND SURVEILLANCE	49	0.267
LANCET	48	0.261
EUROPEAN REVIEW FOR MEDICAL AND PHARMACOLOGICAL SCIENCES	46	0.25
FRONTIERS IN PSYCHOLOGY	46	0.25
PLOS PATHOGENS	46	0.25
JOURNAL OF MEDICAL ETHICS	45	0.245
INTERNATIONAL JOURNAL OF MOLECULAR SCIENCES	43	0.234
MEDICAL HYPOTHESES	43	0.234
CHAOS SOLITONS FRACTALS	42	0.229
LANCET INFECTIOUS DISEASES	42	0.229
PATHOGENS	41	0.223
BMC MEDICINE	40	0.218
EBIOMEDICINE	40	0.218
EPIDEMIOLOGY AND INFECTION	40	0.218
PAN AFRICAN MEDICAL JOURNAL	40	0.218
SCIENCE ADVANCES	40	0.218
SCIENCE TRANSLATIONAL MEDICINE	40	0.218
IEEE ACCESS	39	0.212
INFECTION GENETICS AND EVOLUTION	39	0.212
EMERGING INFECTIOUS DISEASES	38	0.207
MULTIPLE SCLEROSIS AND RELATED DISORDERS	38	0.207
ECLINICALMEDICINE	37	0.201
SIGNAL TRANSDUCTION AND TARGETED THERAPY	37	0.201
JOURNAL OF INFECTION AND PUBLIC HEALTH	36	0.196
DIABETES METABOLIC SYNDROME CLINICAL RESEARCH REVIEWS	35	0.191
ANNALS OF MEDICINE AND SURGERY	34	0.185
ANNALS OF THE RHEUMATIC DISEASES	34	0.185
PUBLIC HEALTH	34	0.185
RISK MANAGEMENT AND HEALTHCARE POLICY	34	0.185
BMJ GLOBAL HEALTH	33	0.18
CELL REPORTS MEDICINE	33	0.18
COMPUTERS IN BIOLOGY AND MEDICINE	33	0.18
DIAGNOSTICS	33	0.18
SOCIAL SCIENCE MEDICINE	32	0.174
SUSTAINABILITY	32	0.174
INTERNATIONAL IMMUNOPHARMACOLOGY	31	0.169
JCI INSIGHT	30	0.163
JOURNAL OF RACIAL AND ETHNIC HEALTH DISPARITIES	30	0.163
JOURNAL OF VIROLOGICAL METHODS	30	0.163
AMERICAN JOURNAL OF TROPICAL MEDICINE AND HYGIENE	29	0.158
CELL HOST MICROBE	29	0.158
CLINICAL MICROBIOLOGY AND INFECTION	29	0.158
HEALTH COMMUNICATION	29	0.158
HELIYON	29	0.158
INFLUENZA AND OTHER RESPIRATORY VIRUSES	29	0.158
PEERJ	29	0.158
RESULTS IN PHYSICS	29	0.158
BRIEFINGS IN BIOINFORMATICS	28	0.152
LANCET REGIONAL HEALTH EUROPE	28	0.152
MEDICINA LITHUANIA	28	0.152
MOLECULES	28	0.152
MSPHERE	28	0.152
PLOS COMPUTATIONAL BIOLOGY	28	0.152
AMERICAN JOURNAL OF TRANSPLANTATION	27	0.147
BIOMEDICINES	27	0.147
FRONTIERS IN PHARMACOLOGY	27	0.147
JOURNAL OF COMMUNITY HEALTH	27	0.147
JOURNAL OF PHARMACEUTICAL RESEARCH INTERNATIONAL	27	0.147
VACCINE X	27	0.147
CELLS	26	0.142
INFECTION AND DRUG RESISTANCE	26	0.142
ISCIENCE	26	0.142
JOURNAL OF CLINICAL VIROLOGY	26	0.142
JOURNAL OF INFECTION IN DEVELOPING COUNTRIES	26	0.142
VIRUS RESEARCH	26	0.142
ALLERGY	25	0.136
CHINA CDC WEEKLY	25	0.136
ELIFE	25	0.136
MATHEMATICS	25	0.136
ANNALS OF INTERNAL MEDICINE	24	0.131
BIOCHEMICAL AND BIOPHYSICAL RESEARCH COMMUNICATIONS	24	0.131
BMJ BRITISH MEDICAL JOURNAL	24	0.131
CANCERS	24	0.131
SCIENCE OF THE TOTAL ENVIRONMENT	24	0.131
BRITISH JOURNAL OF HAEMATOLOGY	23	0.125
CLINICAL CASE REPORTS	23	0.125
DISASTER MEDICINE AND PUBLIC HEALTH PREPAREDNESS	23	0.125
FRONTIERS IN MOLECULAR BIOSCIENCES	23	0.125
IMMUNITY	23	0.125
INFECTION CONTROL AND HOSPITAL EPIDEMIOLOGY	23	0.125
JOURNAL OF IMMUNOLOGY	23	0.125
MICROORGANISMS	23	0.125
EUROPEAN JOURNAL OF CANCER	22	0.12
JAMA JOURNAL OF THE AMERICAN MEDICAL ASSOCIATION	22	0.12
JOURNAL OF CLINICAL MICROBIOLOGY	22	0.12
JOURNAL OF PRIMARY CARE AND COMMUNITY HEALTH	22	0.12
ROYAL SOCIETY OPEN SCIENCE	22	0.12
VIROLOGY	22	0.12
AMERICAN JOURNAL OF CASE REPORTS	21	0.114
AMERICAN JOURNAL OF INFECTION CONTROL	21	0.114
APPLIED SCIENCES BASEL	21	0.114
CLINICAL AND EXPERIMENTAL VACCINE RESEARCH	21	0.114
CLINICAL TRANSLATIONAL IMMUNOLOGY	21	0.114
INFECTIOUS DISEASE MODELLING	21	0.114
JOURNAL OF AUTOIMMUNITY	21	0.114
JOURNAL OF CHEMICAL INFORMATION AND MODELING	21	0.114
JOURNAL OF CLINICAL INVESTIGATION	21	0.114
MICROBIAL PATHOGENESIS	21	0.114
PREVENTIVE MEDICINE REPORTS	21	0.114
BIOLOGY BASEL	20	0.109
ENVIRONMENTAL SCIENCE AND POLLUTION RESEARCH	20	0.109
INFECTION	20	0.109
JOURNAL OF GENERAL INTERNAL MEDICINE	20	0.109
JOURNAL OF HEALTH COMMUNICATION	20	0.109
FRONTIERS IN PEDIATRICS	19	0.103
INFECTIOUS DISEASES OF POVERTY	19	0.103
INTERNATIONAL JOURNAL OF CLINICAL PRACTICE	19	0.103
JOURNAL OF THE ROYAL SOCIETY INTERFACE	19	0.103
MATHEMATICAL BIOSCIENCES AND ENGINEERING	19	0.103
NEUROLOGICAL SCIENCES	19	0.103
NONLINEAR DYNAMICS	19	0.103
RSC ADVANCES	19	0.103
TRANSPLANT INFECTIOUS DISEASE	19	0.103
ACS NANO	18	0.098
ACS PHARMACOLOGY TRANSLATIONAL SCIENCE	18	0.098
BIOSENSORS BIOELECTRONICS	18	0.098
DERMATOLOGIC THERAPY	18	0.098
EUROPEAN JOURNAL OF PHARMACOLOGY	18	0.098
JOURNAL OF PERSONALIZED MEDICINE	18	0.098
PREVENTIVE MEDICINE	18	0.098
SAMJ SOUTH AFRICAN MEDICAL JOURNAL	18	0.098
TRANSBOUNDARY AND EMERGING DISEASES	18	0.098
VIRAL IMMUNOLOGY	18	0.098
AMERICAN JOURNAL OF PUBLIC HEALTH	17	0.093
ARCHIVES OF VIROLOGY	17	0.093
BLOOD	17	0.093
CMC COMPUTERS MATERIALS CONTINUA	17	0.093
HEALTH AFFAIRS	17	0.093
INTERNATIONAL JOURNAL OF PUBLIC HEALTH	17	0.093
NATURE IMMUNOLOGY	17	0.093
PAKISTAN JOURNAL OF MEDICAL HEALTH SCIENCES	17	0.093
RHEUMATOLOGY INTERNATIONAL	17	0.093
SCIENCE IMMUNOLOGY	17	0.093
ADVANCES IN EXPERIMENTAL MEDICINE AND BIOLOGY	16	0.087
CLINICAL IMMUNOLOGY	16	0.087
CLINICAL KIDNEY JOURNAL	16	0.087
COMMUNICATIONS BIOLOGY	16	0.087
IRISH JOURNAL OF MEDICAL SCIENCE	16	0.087
JOURNAL OF LAW AND THE BIOSCIENCES	16	0.087
JOURNAL OF THROMBOSIS AND HAEMOSTASIS	16	0.087
LIFE BASEL	16	0.087
NATURE MICROBIOLOGY	16	0.087
PATIENT PREFERENCE AND ADHERENCE	16	0.087
PLOS MEDICINE	16	0.087
RMD OPEN	16	0.087
TRIALS	16	0.087
AMERICAN JOURNAL OF HEALTH PROMOTION	15	0.082
ANTIVIRAL RESEARCH	15	0.082
ASIA PACIFIC JOURNAL OF PUBLIC HEALTH	15	0.082
EPIDEMICS	15	0.082
EUROPEAN JOURNAL OF RISK REGULATION	15	0.082
FRONTIERS IN NEUROLOGY	15	0.082
INTERNAL MEDICINE	15	0.082
INTERNATIONAL JOURNAL OF HEALTH PLANNING AND MANAGEMENT	15	0.082
JOURNAL OF BEHAVIORAL MEDICINE	15	0.082
JOURNAL OF CONTROLLED RELEASE	15	0.082
JOURNAL OF THE AMERICAN GERIATRICS SOCIETY	15	0.082
JOURNAL OF THE AMERICAN MEDICAL DIRECTORS ASSOCIATION	15	0.082
LANCET REGIONAL HEALTH WESTERN PACIFIC	15	0.082
MED	15	0.082
MEDICINE	15	0.082
NEPHROLOGY DIALYSIS TRANSPLANTATION	15	0.082
PERSONALITY AND INDIVIDUAL DIFFERENCES	15	0.082
PHARMACEUTICALS	15	0.082
PLOS NEGLECTED TROPICAL DISEASES	15	0.082
PUBLIC HEALTH REPORTS	15	0.082
RHEUMATOLOGY	15	0.082
COMPUTATIONAL AND STRUCTURAL BIOTECHNOLOGY JOURNAL	14	0.076
INFLAMMATORY BOWEL DISEASES	14	0.076
INTERNATIONAL JOURNAL OF PEPTIDE RESEARCH AND THERAPEUTICS	14	0.076
JOURNAL OF ALLERGY AND CLINICAL IMMUNOLOGY	14	0.076
JOURNAL OF BIOLOGICAL CHEMISTRY	14	0.076
MILITARY MEDICINE	14	0.076
PEDIATRIC INFECTIOUS DISEASE JOURNAL	14	0.076
PEDIATRICS	14	0.076
PHARMACEUTICS	14	0.076
CELL DISCOVERY	13	0.071
EUROPEAN JOURNAL OF IMMUNOLOGY	13	0.071
FRONTIERS IN CARDIOVASCULAR MEDICINE	13	0.071
FRONTIERS IN GENETICS	13	0.071
IDCASES	13	0.071
IMMUNITY INFLAMMATION AND DISEASE	13	0.071
INFECTIOUS DISEASES	13	0.071
JOURNAL OF FAMILY MEDICINE AND PRIMARY CARE	13	0.071
JOURNAL OF IMMUNOLOGICAL METHODS	13	0.071
JOURNAL OF MULTIDISCIPLINARY HEALTHCARE	13	0.071
JOURNAL OF PURE AND APPLIED MICROBIOLOGY	13	0.071
JOURNAL OF THE AMERICAN SOCIETY OF NEPHROLOGY	13	0.071
NUTRIENTS	13	0.071
SWISS MEDICAL WEEKLY	13	0.071
VIROLOGY JOURNAL	13	0.071
ACS OMEGA	12	0.065
AMERICAN JOURNAL OF OBSTETRICS AND GYNECOLOGY	12	0.065
ANALYTICAL CHEMISTRY	12	0.065
CURRENT OPINION IN VIROLOGY	12	0.065
DATA IN BRIEF	12	0.065
ENVIRONMENTAL RESEARCH	12	0.065
GENE REPORTS	12	0.065
INDIAN JOURNAL OF COMMUNITY HEALTH	12	0.065
INTERNATIONAL JOURNAL OF BIOLOGICAL MACROMOLECULES	12	0.065
JAMA ONCOLOGY	12	0.065
JOURNAL OF CLINICAL AND DIAGNOSTIC RESEARCH	12	0.065
JOURNAL OF CLINICAL IMMUNOLOGY	12	0.065
JOURNAL OF GLOBAL HEALTH	12	0.065
JOURNAL OF MOLECULAR STRUCTURE	12	0.065
JOURNAL OF PROTEOME RESEARCH	12	0.065
JOURNAL OF PUBLIC HEALTH	12	0.065
JOURNAL OF THEORETICAL BIOLOGY	12	0.065
MEDICAL SCIENCE	12	0.065
MULTIPLE SCLEROSIS JOURNAL	12	0.065
VETERINARY MICROBIOLOGY	12	0.065
ACS CENTRAL SCIENCE	11	0.06
ACS INFECTIOUS DISEASES	11	0.06
BIOETHICS	11	0.06
BIOMEDICINE PHARMACOTHERAPY	11	0.06
BLOOD ADVANCES	11	0.06
BMC HEALTH SERVICES RESEARCH	11	0.06
CIENCIA SAUDE COLETIVA	11	0.06
CLINICAL IMAGING	11	0.06
CORONAVIRUS DISEASE COVID 19	11	0.06
FRONTIERS IN CELLULAR AND INFECTION MICROBIOLOGY	11	0.06
FRONTIERS IN COMMUNICATION	11	0.06
INFECTIOUS DISEASE REPORTS	11	0.06
JOURNAL OF EDUCATION AND HEALTH PROMOTION	11	0.06
JOURNAL OF NEUROLOGY	11	0.06
JOURNAL OF THE AMERICAN PHARMACISTS ASSOCIATION	11	0.06
MATHEMATICAL BIOSCIENCES	11	0.06
NANO TODAY	11	0.06
OCULAR IMMUNOLOGY AND INFLAMMATION	11	0.06
PATHOGENS AND GLOBAL HEALTH	11	0.06
PUBLIC HEALTH NURSING	11	0.06
TRANSFUSION AND APHERESIS SCIENCE	11	0.06
TRANSPLANTATION	11	0.06
VIROLOGICA SINICA	11	0.06
ADVANCED MATERIALS	10	0.054
ARTHRITIS RHEUMATOLOGY	10	0.054
BIOMED RESEARCH INTERNATIONAL	10	0.054
BIOMEDICAL AND BIOTECHNOLOGY RESEARCH JOURNAL	10	0.054
CANADIAN JOURNAL OF PUBLIC HEALTH REVUE CANADIENNE DE SANTE PUBLIQUE	10	0.054
CLINICAL CHEMISTRY AND LABORATORY MEDICINE	10	0.054
COMPUTATIONAL AND MATHEMATICAL METHODS IN MEDICINE	10	0.054
CURRENT PSYCHOLOGY	10	0.054
FASEB JOURNAL	10	0.054
FRONTIERS IN PSYCHIATRY	10	0.054
GLOBAL PUBLIC HEALTH	10	0.054
INQUIRY THE JOURNAL OF HEALTH CARE ORGANIZATION PROVISION AND FINANCING	10	0.054
JOURNAL OF RELIGION HEALTH	10	0.054
LANCET MICROBE	10	0.054
LANCET RESPIRATORY MEDICINE	10	0.054
MEDICINA DEL LAVORO	10	0.054
MOLECULAR THERAPY	10	0.054
PLOS BIOLOGY	10	0.054
AGE AND AGEING	9	0.049
AIDS AND BEHAVIOR	9	0.049
ALLERGY AND ASTHMA PROCEEDINGS	9	0.049
ANGEWANDTE CHEMIE INTERNATIONAL EDITION	9	0.049
ANNALS OF NEUROLOGY	9	0.049
APPLIED HEALTH ECONOMICS AND HEALTH POLICY	9	0.049
BIOORGANIC CHEMISTRY	9	0.049
BIOTECHNOLOGY AND BIOENGINEERING	9	0.049
CANADIAN MEDICAL ASSOCIATION JOURNAL	9	0.049
CLINICA CHIMICA ACTA	9	0.049
CLINICAL MEDICINE	9	0.049
EPIDEMIOLOGIA PREVENZIONE	9	0.049
EPIDEMIOLOGY AND HEALTH	9	0.049
EUROPEAN HEART JOURNAL CASE REPORTS	9	0.049
EUROPEAN JOURNAL OF EPIDEMIOLOGY	9	0.049
FRONTIERS IN ONCOLOGY	9	0.049
FRONTIERS IN VETERINARY SCIENCE	9	0.049
FUTURE VIROLOGY	9	0.049
GENES	9	0.049
GLOBALIZATION AND HEALTH	9	0.049
HASTINGS CENTER REPORT	9	0.049
INTERNAL MEDICINE JOURNAL	9	0.049
ISRAEL JOURNAL OF HEALTH POLICY RESEARCH	9	0.049
JAMA INTERNAL MEDICINE	9	0.049
JAMA PEDIATRICS	9	0.049
JOURNAL OF INFECTION	9	0.049
JOURNAL OF INTERDISCIPLINARY MATHEMATICS	9	0.049
JOURNAL OF MOLECULAR GRAPHICS MODELLING	9	0.049
JOURNAL OF NEPHROLOGY	9	0.049
JOURNAL OF THE PEDIATRIC INFECTIOUS DISEASES SOCIETY	9	0.049
JOURNAL OF TRANSLATIONAL MEDICINE	9	0.049
MICROBIOLOGY AUSTRALIA	9	0.049
NATURE REVIEWS IMMUNOLOGY	9	0.049
NUCLEIC ACIDS RESEARCH	9	0.049
POSTGRADUATE MEDICAL JOURNAL	9	0.049
RESEARCH AND PRACTICE IN THROMBOSIS AND HAEMOSTASIS	9	0.049
RESEARCH IN SOCIAL ADMINISTRATIVE PHARMACY	9	0.049
SAUDI MEDICAL JOURNAL	9	0.049
SENSORS	9	0.049
SSM POPULATION HEALTH	9	0.049
TROPICAL MEDICINE AND HEALTH	9	0.049
TROPICAL MEDICINE AND INFECTIOUS DISEASE	9	0.049
VIRUS EVOLUTION	9	0.049
ACTA MEDICA MEDITERRANEA	8	0.044
ADVANCED SCIENCE	8	0.044
ALEXANDRIA ENGINEERING JOURNAL	8	0.044
AMERICAN JOURNAL OF HEMATOLOGY	8	0.044
ANALYTICAL AND BIOANALYTICAL CHEMISTRY	8	0.044
ANNALS OF OPERATIONS RESEARCH	8	0.044
AUSTRALIAN AND NEW ZEALAND JOURNAL OF PUBLIC HEALTH	8	0.044
BIOLOGICALS	8	0.044
BIOMEDICAL JOURNAL	8	0.044
BIOMOLECULES	8	0.044
BIOSCIENCE BIOTECHNOLOGY RESEARCH COMMUNICATIONS	8	0.044
BIOSCIENCE TRENDS	8	0.044
BMC VETERINARY RESEARCH	8	0.044
BRAIN BEHAVIOR AND IMMUNITY	8	0.044
CELL RESEARCH	8	0.044
CELLULAR MOLECULAR IMMUNOLOGY	8	0.044
CHAOS	8	0.044
CLINICAL EPIDEMIOLOGY AND GLOBAL HEALTH	8	0.044
CLINICAL TRANSPLANTATION	8	0.044
COMPUTER METHODS AND PROGRAMS IN BIOMEDICINE	8	0.044
CORNEA	8	0.044
CURRENT ISSUES IN TOURISM	8	0.044
DEVELOPING WORLD BIOETHICS	8	0.044
EMBO MOLECULAR MEDICINE	8	0.044
EUROPEAN JOURNAL OF PEDIATRICS	8	0.044
EUROPEAN JOURNAL OF PUBLIC HEALTH	8	0.044
EUROPEAN PHYSICAL JOURNAL SPECIAL TOPICS	8	0.044
FRONTIERS IN CHEMISTRY	8	0.044
FRONTIERS IN ENDOCRINOLOGY	8	0.044
FRONTIERS IN PLANT SCIENCE	8	0.044
GENOME MEDICINE	8	0.044
HEALTH PROMOTION PRACTICE	8	0.044
HEALTH SECURITY	8	0.044
HUMANITIES SOCIAL SCIENCES COMMUNICATIONS	8	0.044
INDIAN PEDIATRICS	8	0.044
INTERNATIONAL JOURNAL OF ANTIMICROBIAL AGENTS	8	0.044
INTERNATIONAL JOURNAL OF CLINICAL PHARMACOLOGY AND THERAPEUTICS	8	0.044
INTERNATIONAL JOURNAL OF GENERAL MEDICINE	8	0.044
JMIR RESEARCH PROTOCOLS	8	0.044
JOURNAL OF AMERICAN COLLEGE HEALTH	8	0.044
JOURNAL OF BIOMEDICAL INFORMATICS	8	0.044
JOURNAL OF CELLULAR AND MOLECULAR MEDICINE	8	0.044
JOURNAL OF CLINICAL LABORATORY ANALYSIS	8	0.044
JOURNAL OF EPIDEMIOLOGY AND COMMUNITY HEALTH	8	0.044
JOURNAL OF EXPERIMENTAL MEDICINE	8	0.044
JOURNAL OF HEART AND LUNG TRANSPLANTATION	8	0.044
JOURNAL OF INTERNAL MEDICINE	8	0.044
JOURNAL OF MEDICAL CASE REPORTS	8	0.044
JOURNAL OF NEUROIMMUNOLOGY	8	0.044
JOURNAL OF OCCUPATIONAL AND ENVIRONMENTAL MEDICINE	8	0.044
JOURNAL OF PHYSICAL CHEMISTRY LETTERS	8	0.044
JOURNAL OF PUBLIC HEALTH RESEARCH	8	0.044
LANCET PUBLIC HEALTH	8	0.044
MEDICAL JOURNAL OF AUSTRALIA	8	0.044
MEDICAL LETTER ON DRUGS AND THERAPEUTICS	8	0.044
METHODS IN MOLECULAR BIOLOGY	8	0.044
NATURE STRUCTURAL MOLECULAR BIOLOGY	8	0.044
OBSTETRICS AND GYNECOLOGY	8	0.044
ORVOSI HETILAP	8	0.044
PAKISTAN JOURNAL OF PHARMACEUTICAL SCIENCES	8	0.044
PEDIATRIC ALLERGY AND IMMUNOLOGY	8	0.044
PEDIATRIC ANNALS	8	0.044
PEDIATRIC BLOOD CANCER	8	0.044
PROCESSES	8	0.044
PSYCHOLOGY HEALTH MEDICINE	8	0.044
REVISTA DA ASSOCIACAO MEDICA BRASILEIRA	8	0.044
REVISTA DE SAUDE PUBLICA	8	0.044
REVISTA ESPANOLA DE SALUD PUBLICA	8	0.044
RISK ANALYSIS	8	0.044
STRUCTURE	8	0.044
SUSTAINABLE CITIES AND SOCIETY	8	0.044
TRANSFUSION	8	0.044
TRANSLATIONAL BEHAVIORAL MEDICINE	8	0.044
WIENER KLINISCHE WOCHENSCHRIFT	8	0.044
ADVANCES IN DIFFERENCE EQUATIONS	7	0.038
AIMS MATHEMATICS	7	0.038
AMERICAN JOURNAL OF EPIDEMIOLOGY	7	0.038
ANTIBIOTICS BASEL	7	0.038
ARCHIVES OF MEDICAL RESEARCH	7	0.038
ARCHIVES OF PUBLIC HEALTH	7	0.038
BEST PRACTICE RESEARCH CLINICAL OBSTETRICS GYNAECOLOGY	7	0.038
BIOINTERFACE RESEARCH IN APPLIED CHEMISTRY	7	0.038
BIOPHYSICAL JOURNAL	7	0.038
BLOOD CANCER JOURNAL	7	0.038
BMC BIOINFORMATICS	7	0.038
BMC GENOMICS	7	0.038
BMC NEPHROLOGY	7	0.038
BMC RESEARCH NOTES	7	0.038
BRAIN SCIENCES	7	0.038
BRITISH JOURNAL OF CLINICAL PHARMACOLOGY	7	0.038
CELL AND BIOSCIENCE	7	0.038
CEN CASE REPORTS	7	0.038
CLINICAL AND EXPERIMENTAL MEDICINE	7	0.038
COMPARATIVE MEDICINE	7	0.038
COMPUTATIONAL BIOLOGY AND CHEMISTRY	7	0.038
DIAGNOSTIC MICROBIOLOGY AND INFECTIOUS DISEASE	7	0.038
DRUG DELIVERY AND TRANSLATIONAL RESEARCH	7	0.038
ENGINEERING	7	0.038
ESC HEART FAILURE	7	0.038
EUROPEAN JOURNAL OF HEALTH LAW	7	0.038
EUROPEAN JOURNAL OF NEUROLOGY	7	0.038
EUROPEAN PHYSICAL JOURNAL PLUS	7	0.038
EUROPEAN RADIOLOGY	7	0.038
FRONTIERS IN BIOENGINEERING AND BIOTECHNOLOGY	7	0.038
FUTURE ONCOLOGY	7	0.038
IMMUNOLOGICAL INVESTIGATIONS	7	0.038
INDIAN JOURNAL OF CRITICAL CARE MEDICINE	7	0.038
INDIAN JOURNAL OF MEDICAL RESEARCH	7	0.038
INTERNATIONAL JOURNAL FOR EQUITY IN HEALTH	7	0.038
INTERNATIONAL JOURNAL OF HEALTH POLICY AND MANAGEMENT	7	0.038
INTERNATIONAL JOURNAL OF HEMATOLOGY	7	0.038
JOURNAL FOR IMMUNOTHERAPY OF CANCER	7	0.038
JOURNAL OF ADOLESCENT HEALTH	7	0.038
JOURNAL OF CLINICAL AND TRANSLATIONAL SCIENCE	7	0.038
JOURNAL OF HEMATOLOGY ONCOLOGY	7	0.038
JOURNAL OF INFECTION AND CHEMOTHERAPY	7	0.038
JOURNAL OF LAW AND MEDICINE	7	0.038
JOURNAL OF LAW MEDICINE ETHICS	7	0.038
JOURNAL OF PERINATAL MEDICINE	7	0.038
JOURNAL OF PUBLIC HEALTH HEIDELBERG	7	0.038
JOURNAL OF PUBLIC HEALTH MANAGEMENT AND PRACTICE	7	0.038
JOURNAL OF THE AMERICAN CHEMICAL SOCIETY	7	0.038
JOURNAL OF TRAVEL MEDICINE	7	0.038
LANCET GLOBAL HEALTH	7	0.038
LIFE SCIENCES	7	0.038
MEDCOMM	7	0.038
MICROBES AND INFECTION	7	0.038
MICROBIAL BIOTECHNOLOGY	7	0.038
MULTIPLE SCLEROSIS JOURNAL EXPERIMENTAL TRANSLATIONAL AND CLINICAL	7	0.038
NATURE HUMAN BEHAVIOUR	7	0.038
NEW ZEALAND MEDICAL JOURNAL	7	0.038
POULTRY SCIENCE	7	0.038
REVIEWS IN MEDICAL MICROBIOLOGY	7	0.038
REVISTA DO INSTITUTO DE MEDICINA TROPICAL DE SAO PAULO	7	0.038
SAGE OPEN MEDICAL CASE REPORTS	7	0.038
SCIENCE EDUCATION	7	0.038
SCIENTIFIC DATA	7	0.038
THERAPEUTIC INNOVATION REGULATORY SCIENCE	7	0.038
TRANSPLANTATION AND CELLULAR THERAPY	7	0.038
TRANSPLANTATION DIRECT	7	0.038
TRAVEL MEDICINE AND INFECTIOUS DISEASE	7	0.038
ADVANCED THEORY AND SIMULATIONS	6	0.033
AIMS PUBLIC HEALTH	6	0.033
AMERICAN JOURNAL OF GASTROENTEROLOGY	6	0.033
AMERICAN JOURNAL OF HEALTH SYSTEM PHARMACY	6	0.033
AMERICAN JOURNAL OF KIDNEY DISEASES	6	0.033
AMERICAN JOURNAL OF OBSTETRICS GYNECOLOGY MFM	6	0.033
AMERICAN JOURNAL OF PREVENTIVE MEDICINE	6	0.033
ANIMALS	6	0.033
ANNALI DI IGIENE MEDICINA PREVENTIVA E DI COMUNITA	6	0.033
ANNALS OF BEHAVIORAL MEDICINE	6	0.033
ANNALS OF EPIDEMIOLOGY	6	0.033
APPLIED ECONOMICS LETTERS	6	0.033
AVIAN DISEASES	6	0.033
BIOMEDICAL SIGNAL PROCESSING AND CONTROL	6	0.033
BJPSYCH OPEN	6	0.033
BMC NEUROLOGY	6	0.033
CIRCULATION	6	0.033
CLINICAL RHEUMATOLOGY	6	0.033
CLINICAL TRIALS	6	0.033
CLINICS IN DERMATOLOGY	6	0.033
Showing 500 out of 3,449 entries

## Sheet: Publishers
Publishers	Record Count	% of 18,286
Elsevier	3236	17.697
Mdpi	2308	12.622
Springer Nature	1765	9.652
Wiley	1314	7.186
Taylor & Francis	988	5.403
Frontiers Media Sa	882	4.823
NATURE PORTFOLIO	690	3.773
Oxford Univ Press	679	3.713
Public Library Science	443	2.423
Sage	432	2.362
Bmj Publishing Group	414	2.264
Amer Soc Microbiology	282	1.542
Cureus Inc	222	1.214
Lippincott Williams & Wilkins	207	1.132
Cambridge Univ Press	182	0.995
Amer Chemical Soc	178	0.973
Amer Assoc Advancement Science	160	0.875
Amer Medical Assoc	144	0.787
Dove Medical Press Ltd	133	0.727
Centers Disease Control & Prevention	130	0.711
Jmir Publications, Inc	125	0.684
Wolters Kluwer Medknow Publications	108	0.591
Natl Acad Sciences	92	0.503
IEEE	87	0.476
Mary Ann Liebert, Inc	87	0.476
Hindawi Publishing Group	83	0.454
Emerald Group Publishing	76	0.416
Massachusetts Medical Soc	71	0.388
Eur Centre Dis Prevention & Control	67	0.366
Royal Soc Chemistry	58	0.317
Royal Soc London	55	0.301
Korean Acad Medical Sciences	53	0.29
Amer Soc Clinical Investigation Inc	51	0.279
SPRINGER INT PUBL AG	51	0.279
Verduci Publisher	46	0.252
Thieme Medical Publishers	42	0.23
African Field Epidemiology Network-Afenet	40	0.219
Amer Inst Mathematical Sciences-Aims	38	0.208
Walter De Gruyter	35	0.191
Karger	34	0.186
Peerj Inc	34	0.186
Tech Science Press	31	0.17
World Scientific	31	0.17
Amer Soc Trop Med & Hygiene	29	0.159
Bentham Science Publ Ltd	29	0.159
Int Scientific Information, Inc	28	0.153
Keai Publishing Ltd	28	0.153
Sciencedomain Int	27	0.148
J Infection Developing Countries	26	0.142
Chinese Center for Disease Control and Prevention	25	0.137
Amer Coll Physicians	24	0.131
Amer Assoc Immunologists	23	0.126
Amer Soc Hematology	23	0.126
eLIFE SCIENCES PUBL LTD	22	0.12
Future Medicine Ltd	21	0.115
Korean Vaccine Soc	21	0.115
Pagepress Publ	19	0.104
Amer Soc Nephrology	18	0.098
Ios Press	18	0.098
Sa Medical Assoc	18	0.098
Amer Public Health Assoc Inc	17	0.093
Humana Press Inc	16	0.087
LAHORE MEDICAL RESEARCH CENTER LLP	16	0.087
Project Hope	16	0.087
Wiley-Hindawi	16	0.087
Aosis	15	0.082
Japan Soc Internal Medicine	15	0.082
Akademiai Kiado Zrt	14	0.077
Amer Acad Pediatrics	14	0.077
Amer Assoc Cancer Research	13	0.071
Dr M N Khan	13	0.071
E M H Swiss Medical Publishers Ltd	13	0.071
Iop Publishing Ltd	13	0.071
Mattioli 1885	13	0.071
AIP Publishing	12	0.066
Ame Publ Co	12	0.066
Csiro Publishing	12	0.066
Discovery Publication	12	0.066
INT SOC GLOBAL HEALTH	12	0.066
Indian Assoc Preventive & Social Medicine	12	0.066
Premchand Shantidevi Research Foundation	12	0.066
Slack Inc	12	0.066
Tubitak Scientific & Technical Research Council Turkey	12	0.066
Brill	11	0.06
Abrasco-Assoc Brasileira Pos-Graduacao & Saude Coletiva	10	0.055
Dustri-Verlag Dr Karl Feistle	10	0.055
Future Sci Ltd	10	0.055
Tabriz Univ Medical Sciences & Health Services	10	0.055
Termedia Publishing House Ltd	10	0.055
Cma-Canadian Medical Assoc	9	0.049
Edizioni Minerva Medica	9	0.049
Educational Publishing Foundation-American Psychological Assoc	9	0.049
Inferenze Scarl	9	0.049
Ivyspring Int Publ	9	0.049
Korean Soc Epidemiology	9	0.049
Microbiology Soc	9	0.049
Ocean Side Publications Inc	9	0.049
Roy Coll Phys London Editorial Office	9	0.049
Saudi Med J	9	0.049
Sciendo	9	0.049
Spandidos Publ Ltd	9	0.049
Assoc Medica Brasileira	8	0.044
CHIN SOCIETY IMMUNOLOGY	8	0.044
Irca-Bssa	8	0.044
Kerman Univ Medical Sciences	8	0.044
Med Letter Inc	8	0.044
Ministerio De Sanidad Y Consumo	8	0.044
Revista De Saude Publica	8	0.044
Rockefeller Univ Press	8	0.044
Soc Science & Nature	8	0.044
Univ Karachi	8	0.044
Aepress Sro	7	0.038
Amer Assoc Laboratory Animal Science	7	0.038
Amer Psychological Assoc	7	0.038
Biointerface Research Applied Chemistry	7	0.038
Indian Acad Sciences	7	0.038
Informs	7	0.038
Inst Medicina Tropical Sao Paulo	7	0.038
Jaypee Brothers Medical Publishers Pvt Ltd	7	0.038
Medicinska Naklada	7	0.038
Natl Inst Science Communication-Niscair	7	0.038
New Zealand Medical Assoc	7	0.038
Thomson Reuters Australia Ltd	7	0.038
Amer Assoc Avian Pathologists	6	0.033
Amer Board Family Medicine	6	0.033
Amer Dental Assoc	6	0.033
Anadolu Univ	6	0.033
Baishideng Publishing Group Inc	6	0.033
Begell House Inc	6	0.033
Carbone Editore	6	0.033
Edp Sciences S A	6	0.033
Johns Hopkins Univ Press	6	0.033
Malaysian Soc Parasitology Tropical Medicine	6	0.033
Medi+World Int	6	0.033
Modestum Ltd	6	0.033
Nofer Inst Occupational Medicine, Sw	6	0.033
Pan Amer Health Organization	6	0.033
Science & Information Sai Organization Ltd	6	0.033
Soc Editrice Univ	6	0.033
Soc Peruana Obstetricia & Ginecologia	6	0.033
Walter de Gruyter	6	0.033
Advanstar Communications Inc	5	0.027
Amber Publication	5	0.027
Amer Geophysical Union	5	0.027
Amer Physical Soc	5	0.027
Amer Physiological Soc	5	0.027
Amer Roentgen Ray Soc	5	0.027
Aves	5	0.027
Coll Natl Generalistes Enseignants	5	0.027
E-Century Publishing Corp	5	0.027
Endocrine Soc	5	0.027
Food Drug Law Inst	5	0.027
Gesis Leibniz Inst Social Sciences	5	0.027
Harvard Univ Press	5	0.027
Jimma Univ, Ethiopia	5	0.027
Kare Publ	5	0.027
Kluwer Law Int	5	0.027
Science & Knowledge Publ Corp Ltd	5	0.027
Soc Brasileira Medicina Tropical	5	0.027
Tohoku Univ Medical Press	5	0.027
Tsinghua Univ Press	5	0.027
Univ California Press	5	0.027
Univ Indonesia	5	0.027
World Health Organization	5	0.027
Wroclaw Medical Univ	5	0.027
Yerevan State Medical Univ	5	0.027
Acad Medicine Singapore	4	0.022
Amer Inst Physics	4	0.022
Amer Soc Testing Materials	4	0.022
Annual Reviews	4	0.022
Australian Coll Health Service Management	4	0.022
Australian Government, Dept Health & Ageing	4	0.022
Biomedpress	4	0.022
Brookings Inst Press	4	0.022
Cadernos Saude Publica	4	0.022
Canadian Science Publishing	4	0.022
Coll Amer Pathologists	4	0.022
European Respiratory Soc Journals Ltd	4	0.022
Fuji Technology Press Ltd	4	0.022
GALENOS PUBL HOUSE	4	0.022
Imr Press	4	0.022
Int Nepal Epidemiological Assoc	4	0.022
Int Research & Cooperation Assoc Bio & Socio-Sciences Advancement	4	0.022
Jobson Publishing Llc	4	0.022
Journal Pharmacy & Pharmacognosy Research-Jppres	4	0.022
KOREAN SOC ANTIMICROBIAL THERAPY	4	0.022
Korean Soc Microbiology & Biotechnology	4	0.022
Marmara Univ	4	0.022
Medical Communications	4	0.022
Nepal Medical Assoc	4	0.022
Ordem Medicos	4	0.022
Portland Press Ltd	4	0.022
Professional Medical Publications	4	0.022
Sax Inst	4	0.022
Science Press	4	0.022
Soc Nuclear Medicine Inc	4	0.022
Univ Indonesia, Fac Medicine	4	0.022
Univ Maribor, Fac Law	4	0.022
Usc Annenberg Press	4	0.022
Veterinary World	4	0.022
Amer Psychiatric Publishing, Inc	3	0.016
Amer Soc Biochemistry Molecular Biology Inc	3	0.016
Anaesthesia Pain & Intensive Care	3	0.016
Assoc Computing Machinery	3	0.016
Bristol Univ Press & Policy Press	3	0.016
British Inst Radiology	3	0.016
Cig Media Group, Lp	3	0.016
Clin Lab Publ	3	0.016
Codon Publications	3	0.016
Danish Medical Assoc	3	0.016
Elife Sciences Publications Ltd	3	0.016
Excli Journal Managing Office	3	0.016
Fundaco Oswaldo Cruz	3	0.016
Hellenic Bronchologic Soc	3	0.016
Hospital Infantil Mexico	3	0.016
Impact Journals Llc	3	0.016
Innovative Scientific Information & Services Network	3	0.016
Inst Int Relations, Prague	3	0.016
Int Journal Computer Science & Network Security-Ijcsns	3	0.016
Int Scientific Group Applied Preventive Medicine I-Gap Ev	3	0.016
Int Soc Aging & Disease	3	0.016
Int Union Against Tuberculosis Lung Disease (I U A T L D)	3	0.016
Intellect Ltd	3	0.016
Jadoun Science Publishing Group	3	0.016
Japan Focus	3	0.016
Journal Of Drugs In Dermatology	3	0.016
Journal Of Visualized Experiments	3	0.016
Knowledge E	3	0.016
Life Science Alliance Llc	3	0.016
MRE PRESS	3	0.016
Mashhad Univ Med Sciences	3	0.016
Medicina (Buenos Aires)	3	0.016
Medycyna Praktyczna Sp K Sp Zoo	3	0.016
Natl Assoc Biology Teachers Inc	3	0.016
Natl Med Assoc	3	0.016
Oscm Forum	3	0.016
Parlar Scientific Publications (P S P)	3	0.016
Pensoft Publishers	3	0.016
Pleiades Publishing Inc	3	0.016
RADIOLOGICAL SOC NORTH AMERICA (RSNA)	3	0.016
Radiological Soc North America	3	0.016
Research & Medical Education Centre	3	0.016
Royal Coll General Practitioners	3	0.016
SOC MEDICAL BIOCHEMISTS SERBIA	3	0.016
Scientific Scholar Llc	3	0.016
Swiss Chemical Soc	3	0.016
Taru Publications	3	0.016
Tehran Univ Medical Sciences	3	0.016
Ubiquity Press Ltd	3	0.016
Univ Naples Federico Ii	3	0.016
Univ Sao Paolo	3	0.016
Academic Publication Council	2	0.011
Aerospace Medical Assoc	2	0.011
Am Soc Interventional Pain Physicians	2	0.011
Amer Acad Family Physicians	2	0.011
Amer Soc Pharmacology Experimental Therapeutics	2	0.011
Amer Thoracic Soc	2	0.011
Annals Family Medicine	2	0.011
Ariesdue Srl	2	0.011
Asce-Amer Soc Civil Engineers	2	0.011
Assoc Pharmaceutical Teachers India	2	0.011
Baltic Journal Economic Studies	2	0.011
Baskent Univ	2	0.011
Bilimsel Tip Yayinevi	2	0.011
Bio-Protocol	2	0.011
Biomedical Informatics	2	0.011
Bioscientifica Ltd	2	0.011
Bohn Stafleu Van Loghum Bv	2	0.011
British Columbia Medical Association	2	0.011
C M B Assoc	2	0.011
CENTRO INVESTIGACIONES & PUBLICACIONES FARMACEUTICAS	2	0.011
Canadian Vet Med Assoc	2	0.011
Clinical & Exper Rheumatology	2	0.011
Cold Spring Harbor Lab Press, Publications Dept	2	0.011
Colegio Farmaceuticos Provincia De Buenos Aires	2	0.011
Columbia Journal Transnational Law Assoc	2	0.011
Consel Brasil Oftalmologia	2	0.011
EDICIONES PROFESIONALES INFORMACION SL-EPI	2	0.011
ELECTRONIC PUBL LTD	2	0.011
Ediciones Doyma S A	2	0.011
Edizioni Ets	2	0.011
Ejmanager Llc	2	0.011
Electrochemical Soc Inc	2	0.011
Escola Nacl Adm Publica-Enap	2	0.011
Europaische Wissenschaftliche Gesellschaft Ev	2	0.011
FUNDACAO GETULIO VARGAS, EDITORA	2	0.011
Ferrata Storti Foundation	2	0.011
Frontline Medical Communications	2	0.011
Galenos Yayincilik	2	0.011
German Medical Science-Gms	2	0.011
Gunes Kitabevi Ltd Sti	2	0.011
INST DEVELOPMENT STUDIES	2	0.011
Ibn Sina Trust	2	0.011
Igi Global	2	0.011
Inderscience Enterprises Ltd	2	0.011
Indian Nat Sci Acad	2	0.011
Indian Pharmaceutical Assoc	2	0.011
Inpharm Assoc, Phcog Net	2	0.011
Inst Education Policy Studies	2	0.011
Int Journal Pharmaceutical Sciences & Research	2	0.011
Int Press Boston, Inc	2	0.011
International Pharmaceutical Federation	2	0.011
Iranian Scientific Society Medical Entomology	2	0.011
Iustel	2	0.011
Iwa Publishing	2	0.011
JOHNS HOPKINS CENTER COMMUNICATION PROGRAMS-CCP	2	0.011
Journal Evolution Medical & Dental Sciences	2	0.011
Korea Assoc Immunologists	2	0.011
Korea Distribution Science Assoc	2	0.011
Korean Assoc Internal Medicine	2	0.011
Korean Breast Cancer Soc	2	0.011
Laboratorio Tecnologias Informacion & Nuevos Analisis Comunicacion Social	2	0.011
Literatura Medica	2	0.011
Lumen Publishing House	2	0.011
MAKERERE UNIV, COLL HEALTH SCIENCES,SCH MED	2	0.011
Magnanimitas	2	0.011
Medical Library Assoc	2	0.011
Microbiological Society Korea	2	0.011
Ministry Communications & High Technologies Republic Azerbaijan	2	0.011
Naba Al-Hayat Foundation Medical Sciences & Health Care	2	0.011
Natl Acad Inventors	2	0.011
Optical Soc Amer	2	0.011
Penerbit Univ Kebangsaan Malaysia	2	0.011
Permanyer Publ	2	0.011
Pushpa Publishing House	2	0.011
Quadrant Healthcom Inc	2	0.011
Radiation Research Soc	2	0.011
Royal Australian College General Practitioners	2	0.011
Royan Inst	2	0.011
Russian Federation Agency Science & Innovation	2	0.011
SAMI PUBLISHING CO-SPC	2	0.011
Schluetersche Verlagsgesellschaft Mbh & Co Kg	2	0.011
Seoul Korean Soc Emergency Medicine	2	0.011
Soc Argentina Pediatria	2	0.011
Sociedad Espanola Quimioterapia	2	0.011
South African Soc Greek Philosophy & Humanities	2	0.011
Springer Publishing Co	2	0.011
TOTTORI UNIV MEDICAL PRESS	2	0.011
Taiwan Assoc Aerosol Res-Taar	2	0.011
Tuengr Group	2	0.011
UNIV NAVARRA, SERVICIO PUBLICACIONES	2	0.011
Univ Amazonia	2	0.011
Univ Caxias Sul, Programa Pos-Graduacao & Turismo	2	0.011
Univ Federal Juiz Fora, Campus Univ	2	0.011
Univ Illinois	2	0.011
Univ Kebangsaan Malaysia	2	0.011
Univ Montreal, Programmes Bioethique	2	0.011
Univ Sao Paulo, Fac Saude Publica	2	0.011
Univ Studi Trento	2	0.011
Univ Toronto, Medical Soc	2	0.011
Univ Udayana	2	0.011
WESTERN LIBRARIES	2	0.011
William S Hein & Co	2	0.011
Womens Health & Action Research Centre	2	0.011
Yale J Biology Medicine, Inc	2	0.011
Yonsei Univ Coll Medicine	2	0.011
Zhejiang Univ Press	2	0.011
ABRASCO - Brazilian Association of Collective Health	1	0.005
ADEM YAVUZ SONMEZ	1	0.005
ALEXANDRU IOAN CUZA UNIV IASI FAC ECONOMICS & BUSINESS ADM	1	0.005
ARCHIVES GLOBAL PROFESSIONALS	1	0.005
ASIAN ASSOC ATMOSPHERIC ENVIRONMENT	1	0.005
ASOC ANALISIS COMPORTAMIENTO	1	0.005
ATOMIC SPECTROSCOPY PRESS LTD	1	0.005
AULA MEDICA EDICIONES	1	0.005
AVOXA-MEDIENGRUPPE DEUTSCHER APOTHEKER GMBH	1	0.005
Acad Brasileira De Ciencias	1	0.005
Acad Managed Care Pharmacy	1	0.005
Acad Medical Sciences I R Iran	1	0.005
Acta Biochimica Polonica	1	0.005
Acta Cirurgica Brasileira	1	0.005
Aesthetics Media Services-Aesthetixms	1	0.005
Akademika As, Akademika Forlag	1	0.005
Al-Bayader-Al-Rawnaq Neighborhood	1	0.005
Amer Diabetes Assoc	1	0.005
Amer Soc Heating Refrigerating Air-Conditioning Eng, Inc,	1	0.005
Amer Soc Neuroradiology	1	0.005
Arab World English Journal	1	0.005
Asean Federation Psychiatry & Mental Health	1	0.005
Asian Journal Pharmaceutics	1	0.005
Assoc Apoio Pesquisa & Saude Bucal-Apesb	1	0.005
Assoc Arquivos Neuro- Psiquiatria	1	0.005
Assoc Clinical Scientists	1	0.005
Assoc Mechanical Engineers Technicians Slovenia	1	0.005
Associacao Paulista Medicina	1	0.005
Atlantis Press	1	0.005
Auckland Univ Technology, Creative Industries Research Inst	1	0.005
Aurora Health Care, Inc	1	0.005
Australasian Military Medicine Assoc	1	0.005
Ayurveda Sahiti Prabha	1	0.005
BELITUNG RAYA FOUNDATION	1	0.005
Babol Univ Medical Sciences	1	0.005
Bahrain Medical Bulletin	1	0.005
Baycinar Medical Publ-Baycinar Tibbi Yayincilik	1	0.005
Bayrakol Medical Publisher	1	0.005
Behavioral Science Research Inst, Srinakharinwirot Univ	1	0.005
Bezmialem Vakif Univ	1	0.005
Bioaxis Dna Research Centre Private Limited	1	0.005
Bloomsbury Qatar Foundation Journals	1	0.005
Brazilian Assoc Sleep	1	0.005
British Editorial Soc Bone & Joint Surgery	1	0.005
Bucharest Acad Economic Studies, Law Dept	1	0.005
Bulgarian Soc Neurosonology & Cerebral Hemodynamics	1	0.005
Canadian Psychological Assoc	1	0.005
Cancer Intelligence Ltd	1	0.005
Carol Davila Univ Medicine & Pharmacy Publ	1	0.005
Catholic Univ Amer Press	1	0.005
Ccc Publ-Agora Univ	1	0.005
Center Transylvanian Studies	1	0.005
Centre Excellence Molecular Biology-Cemb	1	0.005
Centro Univ Sao Camilo	1	0.005
Ceska Lekarska Spolecnost J Ev Purkyne	1	0.005
Chinese Center Disease Control & Prevention	1	0.005
Christians Assoc Relationships Eastern Europe	1	0.005
Claremont Center Mathematical Sciences	1	0.005
Coll Family Physicians Canada	1	0.005
Coll Physicians & Surgeons Pakistan	1	0.005
Company Biologists Ltd	1	0.005
Complex Systems Publications Inc	1	0.005
Coordinamento Siba	1	0.005
Copd Foundation	1	0.005
Croatian Chemical Soc	1	0.005
DIGITAL COMMONS BEPRESS	1	0.005
Daedalus Enterprises Inc	1	0.005
Dermatovenerological Soc Slovenia	1	0.005
Deutscher Aerzte-Verlag Gmbh	1	0.005
Donner Inst Research Religious & Cultural History	1	0.005
Dowden Health Media	1	0.005
EUROPEAN ACAD HIV-AIDS & INFECTIOUS DISEASES	1	0.005
EUROPEAN RESEARCH CENTER	1	0.005
Economics Bulletin	1	0.005
Edra Spa	1	0.005
Edusoft Publishing	1	0.005
Ege Univ, Fac Economics & Admin Sciences	1	0.005
Enviro Research Publishers	1	0.005
Erciyes Univ Sch Medicine	1	0.005
Europe Our House	1	0.005
European Center Sustainable Development	1	0.005
European Publishing	1	0.005
Fac Engineering, Univ Kragujevac	1	0.005
Fordham Univ School Law	1	0.005
Fukushima Soc Medical Science	1	0.005
Fundacao Oswaldo Cruz, Inst Nacional Controle Qualidade & Saude	1	0.005
Gazi Univ, Fac Med	1	0.005
Giovanni Fioriti Editore	1	0.005
Gospodin Iliev Peytchinski, Ed & Pub	1	0.005
HOGREFE AG-HOGREFE AG SUISSE	1	0.005
Hacettepe Univ, Elt Dept	1	0.005
Harborside Press	1	0.005
Hellenic Soc Gastroenterology	1	0.005
Higher Education Press	1	0.005
Hong Kong Acad Medicine Press	1	0.005
Hrvatsko Farmaceutsko Drustov (Hfd)-Croation Pharmaceutical Soc	1	0.005
INDIAN SOC LABOUR ECONOMICS	1	0.005
INST EASTERN EUROPE & CENTAL ASIA	1	0.005
INST ECONOMICS RESEARCH SAS & INST FORECASTING CSPS SAS	1	0.005
INST MATHEMATICAL STATISTICS-IMS	1	0.005
ISTANBUL UNIV-CERRAHPASA	1	0.005
Imprimatur Publications	1	0.005
Indian Assoc Cultivation Science	1	0.005
Indian Counc Agricultural Res	1	0.005
Industrial Research Inst, Inc	1	0.005
Inst Brasileiro Relacoes Int	1	0.005
Inst Engineering Technology-Iet	1	0.005
Inst Information & Communication Technologies-Bulgarian Acad Sciences	1	0.005
Inst Investigacion Clinica	1	0.005
Inst Israelita Ensino & Pesquisa Albert Einstein	1	0.005
Inst Materia Medica, Chinese Acad Medical Sciences	1	0.005
Inst Math & Mechanics Azerbaijan	1	0.005
Inst Nacional Nutricion	1	0.005
Inst Nacional Salud Publica	1	0.005
Inst Rural Health Lublin, Poland	1	0.005
Int Assoc Online Engineering	1	0.005
Int Heart Journal Assoc	1	0.005
Int Inst Anticancer Research	1	0.005
Int Islamic Univ Malaysia, Press Research Management Center	1	0.005
Int Journal Health Medicine & Current Research-Ijhmcr	1	0.005
Int Journal Pharmaceutical & Phytopharmacological Research	1	0.005
Int Journal Pharmaceutical Research & Allied Sciences	1	0.005
Int Scientific Information Inc	1	0.005
Int Scientific Research Publications	1	0.005
Int Soc Art Science & Technology-Isast	1	0.005
Int Soc Hypertension Blacks-Ishib	1	0.005
Int Union Crystallography	1	0.005
Iran Univ Medical Sciences	1	0.005
Israel Medical Assoc Journal	1	0.005
Itb Journal Publ	1	0.005
Iucn-Ssc Asian Elephant Specialist Group	1	0.005
J A S S S	1	0.005
J Rheumatol Publ Co	1	0.005
Jannetti Publications, Inc	1	0.005
Japan Acad	1	0.005
Japan Epidemiological Assoc	1	0.005
Japan Soc Vet Sci	1	0.005
Japanese Soc Study Xenobiotics	1	0.005
John Benjamins Publishing Co	1	0.005
John Libbey Eurotext Ltd	1	0.005
Journal Investment Management	1	0.005
Kafkas Univ, Veteriner Fakultesi Dergisi	1	0.005
Keio Journal Medicine	1	0.005
Showing 500 out of 681 entries

## Sheet: Research Areas
Research Areas	Record Count	% of 18,370
Immunology	3063	16.674
Public Environmental Occupational Health	2114	11.508
Research Experimental Medicine	2093	11.394
General Internal Medicine	1968	10.713
Science Technology Other Topics	1522	8.285
Infectious Diseases	1354	7.371
Biochemistry Molecular Biology	1010	5.498
Microbiology	981	5.34
Virology	833	4.535
Pharmacology Pharmacy	820	4.464
Health Care Sciences Services	653	3.555
Biotechnology Applied Microbiology	563	3.065
Chemistry	562	3.059
Cell Biology	523	2.847
Environmental Sciences Ecology	508	2.765
Computer Science	363	1.976
Engineering	360	1.96
Neurosciences Neurology	327	1.78
Business Economics	275	1.497
Oncology	261	1.421
Psychology	261	1.421
Life Sciences Biomedicine Other Topics	250	1.361
Biophysics	249	1.355
Mathematical Computational Biology	248	1.35
Pediatrics	246	1.339
Social Sciences Other Topics	244	1.328
Mathematics	242	1.317
Physics	235	1.279
Hematology	234	1.274
Materials Science	227	1.236
Cardiovascular System Cardiology	194	1.056
Government Law	177	0.964
Parasitology	160	0.871
Surgery	153	0.833
Medical Informatics	149	0.811
Rheumatology	144	0.784
Tropical Medicine	142	0.773
Biomedical Social Sciences	138	0.751
Genetics Heredity	131	0.713
Urology Nephrology	130	0.708
Transplantation	128	0.697
Endocrinology Metabolism	127	0.691
Obstetrics Gynecology	125	0.68
Veterinary Sciences	122	0.664
Medical Ethics	121	0.659
Psychiatry	116	0.631
Communication	112	0.61
Respiratory System	107	0.582
Geriatrics Gerontology	103	0.561
Education Educational Research	98	0.533
Allergy	91	0.495
Radiology Nuclear Medicine Medical Imaging	91	0.495
Gastroenterology Hepatology	87	0.474
Nursing	87	0.474
Dermatology	86	0.468
Information Science Library Science	73	0.397
Social Issues	71	0.386
Telecommunications	66	0.359
Medical Laboratory Technology	63	0.343
Ophthalmology	62	0.338
Nutrition Dietetics	51	0.278
Pathology	51	0.278
Toxicology	51	0.278
Dentistry Oral Surgery Medicine	46	0.25
Operations Research Management Science	44	0.24
Food Science Technology	43	0.234
Emergency Medicine	41	0.223
International Relations	40	0.218
Plant Sciences	40	0.218
Instruments Instrumentation	36	0.196
Agriculture	34	0.185
Otorhinolaryngology	33	0.18
Legal Medicine	32	0.174
Integrative Complementary Medicine	31	0.169
Mechanics	29	0.158
Sociology	29	0.158
Public Administration	28	0.152
History Philosophy Of Science	27	0.147
Religion	26	0.142
Reproductive Biology	26	0.142
Social Work	25	0.136
Area Studies	24	0.131
Electrochemistry	22	0.12
Polymer Science	22	0.12
Mathematical Methods In Social Sciences	21	0.114
Anesthesiology	20	0.109
Rehabilitation	20	0.109
Energy Fuels	19	0.103
Physiology	19	0.103
Sport Sciences	19	0.103
Transportation	19	0.103
Zoology	19	0.103
Automation Control Systems	18	0.098
Construction Building Technology	17	0.093
Evolutionary Biology	17	0.093
Geology	17	0.093
Arts Humanities Other Topics	16	0.087
Crystallography	16	0.087
Development Studies	15	0.082
Meteorology Atmospheric Sciences	15	0.082
Water Resources	15	0.082
Orthopedics	14	0.076
Geography	13	0.071
Philosophy	13	0.071
Substance Abuse	12	0.065
Linguistics	11	0.06
Behavioral Sciences	8	0.044
Developmental Biology	8	0.044
Family Studies	8	0.044
Thermodynamics	8	0.044
Urban Studies	8	0.044
Anthropology	7	0.038
Cultural Studies	7	0.038
History	7	0.038
Acoustics	6	0.033
Remote Sensing	6	0.033
Women S Studies	6	0.033
Biodiversity Conservation	5	0.027
Criminology Penology	4	0.022
Optics	4	0.022
Physical Geography	4	0.022
Robotics	4	0.022
Spectroscopy	4	0.022
Ethnic Studies	3	0.016
Film Radio Television	3	0.016
Metallurgy Metallurgical Engineering	3	0.016
Anatomy Morphology	2	0.011
Audiology Speech Language Pathology	2	0.011
Demography	2	0.011
Microscopy	2	0.011
Mycology	2	0.011
Theater	2	0.011
Architecture	1	0.005
Art	1	0.005
Astronomy Astrophysics	1	0.005
Entomology	1	0.005
Forestry	1	0.005
Imaging Science Photographic Technology	1	0.005
Literature	1	0.005
Marine Freshwater Biology	1	0.005
Mineralogy	1	0.005

## Sheet: Countries
Countries/Regions	Record Count	% of 18,370
USA	6074	33.065
PEOPLES R CHINA	1927	10.49
ENGLAND	1813	9.869
ITALY	1340	7.295
INDIA	1311	7.137
GERMANY	1059	5.765
CANADA	817	4.447
AUSTRALIA	701	3.816
FRANCE	622	3.386
SAUDI ARABIA	622	3.386
SPAIN	592	3.223
JAPAN	517	2.814
ISRAEL	461	2.51
BRAZIL	447	2.433
TURKEY	439	2.39
SOUTH KOREA	436	2.373
NETHERLANDS	434	2.363
SWITZERLAND	433	2.357
PAKISTAN	345	1.878
IRAN	333	1.813
SOUTH AFRICA	331	1.802
BELGIUM	310	1.688
POLAND	294	1.6
EGYPT	272	1.481
SWEDEN	267	1.453
SCOTLAND	237	1.29
TAIWAN	232	1.263
GREECE	224	1.219
AUSTRIA	212	1.154
BANGLADESH	206	1.121
DENMARK	196	1.067
SINGAPORE	186	1.013
MALAYSIA	184	1.002
THAILAND	176	0.958
PORTUGAL	174	0.947
MEXICO	172	0.936
RUSSIA	166	0.904
NIGERIA	153	0.833
INDONESIA	146	0.795
NORWAY	141	0.768
U ARAB EMIRATES	133	0.724
ROMANIA	126	0.686
IRELAND	123	0.67
JORDAN	113	0.615
VIETNAM	107	0.582
CZECH REPUBLIC	99	0.539
QATAR	99	0.539
ETHIOPIA	98	0.533
FINLAND	98	0.533
NEW ZEALAND	96	0.523
ARGENTINA	92	0.501
CHILE	82	0.446
COLOMBIA	81	0.441
GHANA	78	0.425
WALES	77	0.419
PHILIPPINES	73	0.397
HUNGARY	71	0.386
PERU	61	0.332
IRAQ	59	0.321
CROATIA	56	0.305
LEBANON	56	0.305
NORTH IRELAND	54	0.294
SLOVENIA	54	0.294
MOROCCO	53	0.289
SERBIA	50	0.272
CYPRUS	48	0.261
KENYA	46	0.25
KUWAIT	46	0.25
NEPAL	43	0.234
SUDAN	40	0.218
TUNISIA	37	0.201
UKRAINE	36	0.196
OMAN	34	0.185
SLOVAKIA	33	0.18
UGANDA	32	0.174
BULGARIA	31	0.169
ECUADOR	31	0.169
CAMEROON	30	0.163
LITHUANIA	28	0.152
SRI LANKA	28	0.152
KAZAKHSTAN	25	0.136
PALESTINE	24	0.131
ZIMBABWE	24	0.131
BAHRAIN	23	0.125
ESTONIA	23	0.125
LATVIA	22	0.12
LUXEMBOURG	22	0.12
COSTA RICA	21	0.114
CUBA	21	0.114
MALTA	21	0.114
TANZANIA	20	0.109
AFGHANISTAN	19	0.103
DEM REP CONGO	19	0.103
MOZAMBIQUE	19	0.103
VENEZUELA	19	0.103
RWANDA	18	0.098
ALGERIA	16	0.087
MALAWI	16	0.087
REP CONGO	16	0.087
URUGUAY	15	0.082
TRINIDAD TOBAGO	14	0.076
YEMEN	14	0.076
SENEGAL	13	0.071
BURKINA FASO	12	0.065
SYRIA	12	0.065
LIBYA	11	0.06
BOSNIA HERCEG	10	0.054
BOLIVIA	9	0.049
GAMBIA	9	0.049
MADAGASCAR	9	0.049
SIERRA LEONE	9	0.049
BARBADOS	8	0.044
BENIN	8	0.044
GABON	8	0.044
KOSOVO	8	0.044
MALI	8	0.044
NORTH MACEDONIA	8	0.044
PANAMA	8	0.044
ALBANIA	7	0.038
ARMENIA	7	0.038
DOMINICAN REP	7	0.038
GEORGIA	7	0.038
ICELAND	7	0.038
AZERBAIJAN	6	0.033
BELARUS	6	0.033
BHUTAN	6	0.033
BRUNEI	6	0.033
CAMBODIA	6	0.033
KYRGYZSTAN	6	0.033
LIBERIA	6	0.033
PARAGUAY	6	0.033
ZAMBIA	6	0.033
BOTSWANA	5	0.027
GUINEA	5	0.027
MAURITIUS	5	0.027
MONGOLIA	5	0.027
SOMALIA	5	0.027
TOGO	5	0.027
ANGOLA	4	0.022
COTE IVOIRE	4	0.022
CURACAO	4	0.022
LIECHTENSTEIN	4	0.022
UZBEKISTAN	4	0.022
GRENADA	3	0.016
HONDURAS	3	0.016
JAMAICA	3	0.016
LAOS	3	0.016
MOLDOVA	3	0.016
MYANMAR	3	0.016
NIGER	3	0.016
SOUTH SUDAN	3	0.016
ST KITTS NEVI	3	0.016
ANGUILLA	2	0.011
BURUNDI	2	0.011
ERITREA	2	0.011
ESWATINI	2	0.011
FIJI	2	0.011
GUATEMALA	2	0.011
GUINEA BISSAU	2	0.011
GUYANA	2	0.011
HAITI	2	0.011
LESOTHO	2	0.011
MALDIVES	2	0.011
MICRONESIA	2	0.011
MONACO	2	0.011
MONTENEGRO	2	0.011
NAMIBIA	2	0.011
NICARAGUA	2	0.011
PAPUA N GUINEA	2	0.011
SAN MARINO	2	0.011
ST VINCENT	2	0.011
ARUBA	1	0.005
CENT AFR REPUBL	1	0.005
CHAD	1	0.005
DJIBOUTI	1	0.005
DOMINICA	1	0.005
EL SALVADOR	1	0.005
EQUAT GUINEA	1	0.005
FAROE ISLANDS	1	0.005
FRENCH GUIANA	1	0.005
MAURITANIA	1	0.005
NETH ANTILLES	1	0.005
SAMOA	1	0.005
SAO TOME PRIN	1	0.005
SINT MAARTEN	1	0.005
SOLOMON ISLANDS	1	0.005
UNITED KINGDOM	1	0.005
71 record(s) (0.386%) do not contain data in the field being analyzed

## Sheet: Web of Science Index
Web of Science Index	Record Count	% of 18,370
Science Citation Index Expanded (SCI-EXPANDED)	14945	81.355
Social Sciences Citation Index (SSCI)	3343	18.198
Emerging Sources Citation Index (ESCI)	2451	13.342
Arts & Humanities Citation Index (A&HCI)	68	0.37
Book Citation Index – Science (BKCI-S)	28	0.152
Index Chemicus (IC)	21	0.114
Conference Proceedings Citation Index – Science (CPCI-S)	9	0.049
Book Citation Index – Social Sciences & Humanities (BKCI-SSH)	2	0.011
Current Chemical Reactions (CCR-EXPANDED)	1	0.005
Conference Proceedings Citation Index – Social Science & Humanities (CPCI-SSH)	1	0.005
