# Supplementary material for: A Bibliometric Visualization Analysis on Vaccine Development of Coronavirus Disease 2019 (COVID-19)
Source: Vaccines (Basel). 2023 Jan 29;11(2):295. doi: 10.3390/vaccines11020295 (PMC9959778; doi:10.3390/vaccines11020295)
Supplement: Supplementary file 1 [file vaccines-11-00295-s001.zip › Appendix S8 the retracted articles.csv]

Key	Item Type	Publication Year	Author	Title	Publication Title	ISBN	ISSN	DOI	Abstract Note	Date	Date Added	Date Modified	Access Date	Pages	Num Pages	Issue	Volume	Number Of Volumes	Journal Abbreviation	Short Title	Series	Language	Withdrawal Link	Reason for withdrawal	Major Reason for withdrawal
DFB6WCKU	journalArticle	2021	Kalliantas, D.; Kallianta, M.; Karagianni, Ch S.	Homeopathy combat against coronavirus disease (Covid-19)	Journal of Public Health-Heidelberg		2198-1833	10.1007/s10389-020-01305-z	Aim Today, humanity is living through the third serious coronavirus outbreak in less than 20 years, following SARS in 2002-2003 and MERS in 2012. While the final cost on human lives and world economy remains unpredictable, the timely identification of a suitable treatment and the development of an effective vaccine remain a significant challenge and will still require time. The aim of this study …	21-Feb	2022/11/10 4:51	2022/11/10 6:05		253-253		1	29		J. Public Health-Heidelberg			English	https://link.springer.com/article/10.1007/s10389-020-01305-z	1.Error in Analyses£ºmistake made in the evaluation of the data or calculations 2.Error in Methods£ºmistake made in the experimental protocol, either in following the wrong protocol, or in erring during the performance of the protocol 3.Error in Results and/or Conclusions£º mistake made in determining the results or establishing conclusions from an experiment or analysis. The Editor-in-Chief has …	error in analyses error in methods error in results
P5X8PNIE	journalArticle	2021	Walach, Harald; Klement, Rainer J.; Aukema, Wouter	The Safety of COVID-19 Vaccinations-We Should Rethink the Policy (Publication with Expression of Concern. See vol. 9, 2021) (Retracted article. See vol. 9, 2021)	Vaccines			10.3390/vaccines9070693	Background: COVID-19 vaccines have had expedited reviews without sufficient safety data. We wanted to compare risks and benefits. Method: We calculated the number needed to vaccinate (NNTV) from a large Israeli field study to prevent one death. We accessed the Adverse Drug Reactions (ADR) database of the European Medicines Agency and of the Dutch National Register (lareb.nl) to extract the number…	21-Jul	2022/11/10 9:06	2022/11/10 9:09		693		7	9		Vaccines			English	https://www.mdpi.com/2076-393X/9/7/729/htm	1.Concerns/Issues About Data Any question, controversy or dispute over the validity of the data 2.Error in Analyses£º mistake made in the evaluation of the data or calculations. 3.Error in Data£º mistake made in the data, either in data entry, gathering or identification. 4.Error in Results and/or Conclusions£º mistake made in determining the results or establishing conclusions from an experiment…	error in analyses error in data error in results
NG5SH2UR	journalArticle	2021	Kostoff, Ronald N.; Calina, Daniela; Kanduc, Darja; Briggs, Michael B.; Vlachoyiannopoulos, Panayiotis; Svistunov, Andrey A.; Tsatsakis, Aristidis	Why are we vaccinating children against COVID-19?	Toxicology Reports			10.1016/j.toxrep.2021.08.010	This article examines issues related to COVID-19 inoculations for children. The bulk of the official COVID-19attributed deaths per capita occur in the elderly with high comorbidities, and the COVID-19 attributed deaths per capita are negligible in children. The bulk of the normalized post-inoculation deaths also occur in the elderly with high comorbidities, while the normalized post-inoculation d…	2021	2022/11/10 9:22	2022/11/10 9:22		1665-1684			8		Toxicol. Rep.			English	https://www.sciencedirect.com/science/article/pii/S2214750022001160?via%3Dihub	1.Bias Issues or Lack of Balance. 2.Concerns/Issues About Data any question, controversy or dispute over the validity of the data 3.Unreliable Results£ºthe accuracy or validity of the results is questionable. 4.Upgrade/Update of Prior Notice£ºEither a change to or affirmation of a prior notice. The focus of the paper is on a critically important public health issue. As such, it is essential that …	controversy of data evidence of bias unreliable results
KZQAJ4EW	journalArticle	2021	Banerji, Aleena; Wickner, Paige G.; Saff, Rebecca; Stone, Cosby A.; Robinson, Lacey B.; Long, Aidan A.; Wolfson, Anna R.; Williams, Paul; Khan, David A.; Phillips, Elizabeth; Blumenthal, Kimberly G.	mRNA Vaccines to Prevent COVID-19 Disease and Reported Allergic Reactions: Current Evidence and Suggested Approach	Journal of Allergy and Clinical Immunology-in Practice		2213-2198	10.1016/j.jaip.2020.12.047	The U.S. Food and Drug Administration (FDA) has recently issued an Emergency Use Authorization (EUA) for 2 highly effective coronavirus disease 2019 (COVID-19) vaccines from Pfizer-BioNTech and Moderna. This has brought hope to millions of Americans in the midst of an ongoing global pandemic. The FDA EUA guidance for both vaccines is to not administer the vaccine to individuals with a known histo…	21-Apr	2022/11/10 9:28	2022/11/10 9:28		1423-1437		4	9		J. Allergy Clin. Immunol.-Pract.			English	https://www.jaci-inpractice.org/article/S2213-2198(20)31411-2/fulltext	1.Date of Retraction/Other Unknown£º lack of publishing date given on the notice? or the date on the notice is not representative of the actual notice date. Commonly found when Publishers overwrite the original article HTML page with the retraction notice, without changing the publication date to reflect such. 2.Notice - Limited or No Information 3.Withdrawal the original article is removed from …	lack of data
52EY9N59	journalArticle	2021	Ma, Rongyang; Wu, Hong; Deng, Zhaohua	Identify and measure the degree of over-prevention behaviors in the post-COVID-19 era in China	Bmc Public Health			10.1186/s12889-021-11823-4	Background With the spread of vaccines, more and more countries have controlled the outbreak of the COVID-19. In this post-epidemic era, these countries began to revive their economy. However, pollution remains in the environment, and people's physical and psychological health has been under threat due to some over-prevention behaviors. Instruments for governmental agencies to manage these behavi…	2021/9/25	2022/11/10 9:28	2022/11/10 9:28		1743		1	21		BMC Public Health			English	https://bmcpublichealth.biomedcentral.com/articles/10.1186/s12889-021-12352-w	1.Lack of IRB/IACUC Approval£ºailure to obtain consent from the institutional ethical review board overseeing human or animal experimentation. The Editors have retracted this article because this study had not received any ethics approval. None of the authors have responded to any correspondence from the editor/publisher about this retraction.	no ethics approval
2JT7PX68	journalArticle	2021	Jin, Changzhong; Yu, Bin; Zhang, Jie; Wu, Hao; Zhou, Xipeng; Yao, Hangping; Liu, Fumin; Lu, Xiangyun; Cheng, Linfang; Jiang, Miao; Wu, Nanping	Methylene blue photochemical treatment as a reliable SARS-CoV-2 plasma virus inactivation method for blood safety and convalescent plasma therapy for COVID-19	Bmc Infectious Diseases			10.1186/s12879-021-05993-0	Background In 2020, a new coronavirus, SARS-CoV-2, quickly spread worldwide within a few months. Although coronaviruses typically infect the upper or lower respiratory tract, the virus RNA can be detected in plasma. The risk of transmitting coronavirus via transfusion of blood products remains. As more asymptomatic infections are identified in COVID-19 cases, blood safety has become particularly …	2021/4/16	2022/11/10 9:32	2022/11/10 9:32		357		1	21		BMC Infect. Dis.			English	https://bmcinfectdis.biomedcentral.com/articles/10.1186/s12879-021-06344-9	1.Concerns/Issues About Data£ºany question, controversy or dispute over the validity of the data 2.Conflict of Interest£ºauthors having affiliations with companies, associations, or institutions that may serve to influence their belief about their findings. 3.Duplication of Image also known as self-plagiarism? Used when an image from an item written by one or all authors of the original article i…	controversy of data duplication of Image unreliable results
RGI9Q2JD	journalArticle	2021	Saha, Pritam; Mukherjee, Debadyuti; Singh, Pawan Kumar; Ahmadian, Ali; Ferrara, Massimiliano; Sarkar, Ram	GraphCovidNet: A graph neural network based model for detecting COVID-19 from CT scans and X-rays of chest	Scientific Reports		2045-2322	10.1038/s41598-021-87523-1	COVID-19, a viral infection originated from Wuhan, China has spread across the world and it has currently affected over 115 million people. Although vaccination process has already started, reaching sufficient availability will take time. Considering the impact of this widespread disease, many research attempts have been made by the computer scientists to screen the COVID-19 from Chest X-Rays (CX…	2021/4/15	2022/11/10 9:32	2022/11/10 9:32		8304		1	11		Sci Rep			English	https://www.nature.com/articles/s41598-021-02469-8	1.Error in Analyses£º mistake made in the evaluation of the data or calculations 2.Unreliable Results£ºthe accuracy or validity of the results is questionable The Editors have retracted this Article.The testing accuracy for the method reported in the Article was found to be over 99% for all datasets. However, it has been brought to the Editors' attention after the publication of the Article that …	error in analyses unreliable results
6KKRWBZ3	journalArticle	2021	Dutta, Shantanu; Kumar, Ashok; Dutta, Moumita; Walsh, Caolan	Tracking COVID-19 vaccine hesitancy and logistical challenges: A machine learning approach	Plos One		1932-6203	10.1371/journal.pone.0252332	In this study, we use an effective word embedding model (word2vec) to systematically track 'vaccine hesitancy' and 'logistical challenges' associated with the Covid-19 vaccines, in the USA. To that effect, we use news articles from reputed media sources and create dictionaries to estimate different aspects of vaccine hesitancy and logistical challenges. Using machine learning and natural language…	2021/6/2	2022/11/10 9:38	2022/11/10 9:38		e0252332		6	16		PLoS One			English	https://journals.plos.org/plosone/article?id=10.1371/journal.pone.0255347	1.Breach of Policy by Author:A violation of the Journal, Publisher or Institutional accepted practices by the author. 2.Lack of Approval from Third Party: Failure to obtain agreement from original author(s). 3.Withdrawal the original article is removed from access on the Journal publishing platform. After this article [1] was published, concerns came to light regarding data use permissions. The a…	breach of policy by author lack of approval from third party
2DKT627D	journalArticle	2021	Colchero, Fernando; Eckardt, Winnie; Stoinski, Tara	Exploring the potential effect of COVID-19 on an endangered great ape (Retracted article. See vol. 12, 2022)	Scientific Reports		2045-2322	10.1038/s41598-021-00061-8	The current COVID-19 pandemic has created unmeasurable damages to society at a global level, from the irreplaceable loss of life, to the massive economic losses. In addition, the disease threatens further biodiversity loss. Due to their shared physiology with humans, primates, and particularly great apes, are susceptible to the disease. However, it is still uncertain how their populations would r…	2021/10/21	2022/11/10 9:38	2022/11/10 9:38		20715		1	11		Sci Rep			English	https://www.nature.com/articles/s41598-022-05893-6	1.Error in Analyses: mistake made in the evaluation of the data or calculations 2.Error in Methods: mistake made in the experimental protocol, either in following the wrong protocol, or in erring during the performance of the protocol 3.Error in Results and/or Conclusions: mistake made in determining the results or establishing conclusions from an experiment or analysis It was brought to our atte…	error in analyses error in methods error in results
T5KHKFNB	journalArticle	2021	Jiang, Hui; Mei, Ya-Fang	SARS-CoV-2 Spike Impairs DNA Damage Repair and Inhibits V(D)J Recombination In Vitro (Publication with Expression of Concern. See vol. 14, 2022)	Viruses-Basel			10.3390/v13102056	Severe acute respiratory syndrome coronavirus 2 (SARS-CoV-2) has led to the coronavirus disease 2019 (COVID-19) pandemic, severely affecting public health and the global economy. Adaptive immunity plays a crucial role in fighting against SARS-CoV-2 infection and directly influences the clinical outcomes of patients. Clinical studies have indicated that patients with severe COVID-19 exhibit delaye…	21-Oct	2022/11/10 9:49	2022/11/10 9:49		2056		10	13		Viruses-Basel			English	https://www.mdpi.com/1999-4915/14/5/1011	1.Concerns/Issues About Data: any question, controversy or dispute over the validity of the data 2.Error in Analyses£ºmistake made in the evaluation of the data or calculations 3.Unreliable Results£ºthe accuracy or validity of the results is questionable 4.Upgrade/Update of Prior Noticeï¼šEither a change to or affirmation of a prior notice. We are issuing this expression of concern in consultatio…	error in analyses unreliable results
